# Supplementary material for: Intensive Distribution of G2-Quaduplexes in the Pseudorabies Virus Genome and Their Sensitivity to Cations and G-Quadruplex Ligands
Source: MDPI journal article supplement (doi:10.3390/molecules24040774), 2019-02-21
Supplement: s1 [file s1]

gi|9625875|ref|NC\_001348.1| Human herpesvirus 3, complete genome

|                                                                           |                      |                                                |
|---------------------------------------------------------------------------|----------------------|------------------------------------------------|
| 191 220 173 562 CDS product membrane protein UL56                         | 191-220 6:03:01      | CCGCCCACCTGGGACCCCGCGGTCACCC                   |
| 254 288 173 562 CDS product membrane protein UL56                         | 254-288 7:04:01      | CCCCATCCCCTACCTACCCACATACGCCGAGGCC             |
| 515 546 173 562 CDS product membrane protein UL56                         | 515-546 5:02:01      | CCATTGTTGCCGTTTTCCCGAGGAACCTCCC                |
| 872 907 589 915 CDS product membrane protein V1                           | 872-907 6:03:01      | CCCGAACACCTTCCGGTACCCATACTCCGATACCC            |
| 1708 1736 1185 1850 CDS product myristylated tegument protein CIRC        | 1708-1736 5:02:01    | CCGACCCACTCTCCCAACCCTAACAGCCC                  |
| 1974 1991 1908 2447 CDS product nuclear protein UL55                      | 1974-1991 4:01:01    | CCGGTCCAACACTCCGCC                             |
| 3526 3548 2783 4141 CDS product multifunctional expression regulator      | 3526-3548 4:01:01    | GGTCACGCTGGCTCCCGCGGTGG                        |
| 5118 5138 4252 5274 CDS product envelope glycoprotein K                   | 5118-5138 5:02:01    | CCCCATACAACCGGTCCACC                           |
| 5472 5492 5326 8577 CDS product helicase-primase primase subunit          | 5472-5492 4:01:01    | CCGGGGAGCCGTTCTTCCTCC                          |
| 5947 5960 5326 8577 CDS product helicase-primase primase subunit          | 5947-5960 4:01:01    | CCAACCGCCGTCCC                                 |
| 7125 7150 5326 8577 CDS product helicase-primase primase subunit          | 7125-7150 5:02:01    | GGGTGGATTTGAGGGAATAGTGGAGG                     |
| 8692 8720 8607 9386 CDS product tegument protein UL51                     | 8692-8720 7:04:01    | CCCCCAAGGAGCCGCCCTGCTCCGCCTCC                  |
| 8989 9002 8607 9386 CDS product tegument protein UL51                     | 8989-9002 4:01:01    | GGTTGGCGCGGTGG                                 |
| 12579 12598 12160 13392 CDS product transactivating tegument protein VP16 | 12579-12598 4:01:01  | CCTAGTCCACCAAAGCAACC                           |
| 13320 13367 12160 13392 CDS product transactivating tegument protein VP16 | 13320-13367 10:07:02 | CCTCCGTCCCCATCCGAGATCCTGCCGGGGACCCACCACGCCACCC |

|                                                                |       |       |       |                                      |                                              |
|----------------------------------------------------------------|-------|-------|-------|--------------------------------------|----------------------------------------------|
| 14341                                                          | 14366 | 13590 | 16049 | CDS product tegument protein VP13/14 | 14341-14366 4:01:01                          |
| GGTTATGGAGCCTGCGGTATCAAAGG                                     |       |       |       |                                      |                                              |
| 14812                                                          | 14833 | 13590 | 16049 | CDS product tegument protein VP13/14 | 14812-14833 4:01:01 GGGCCAAGGAACGGCCATTTGG   |
| 15095                                                          | 15121 | 13590 | 16049 | CDS product tegument protein VP13/14 | 15095-15121 4:01:01                          |
| GGTTTTTTTGGGGCGTTGGCATATTGG                                    |       |       |       |                                      |                                              |
| 15944                                                          | 15967 | 13590 | 16049 | CDS product tegument protein VP13/14 | 15944-15967 5:02:01 CCCATTCCCTCCGTGGACCTAGCC |
| 16396                                                          | 16423 | 16214 | 18199 | CDS product tegument protein VP11/12 | 16396-16423 6:03:01                          |
| GGCGAGGCTTTGGAGACGGCGTAAAGG                                    |       |       |       |                                      |                                              |
| 16621                                                          | 16639 | 16214 | 18199 | CDS product tegument protein VP11/12 | 16621-16639 4:01:01 GGGGATGGACTTTGGTGGG      |
| 16751                                                          | 16784 | 16214 | 18199 | CDS product tegument protein VP11/12 | 16751-16784 5:02:01                          |
| CCGTAGTTGCCAATAAACCAATATCCAGACATCC                             |       |       |       |                                      |                                              |
| 16882                                                          | 16907 | 16214 | 18199 | CDS product tegument protein VP11/12 | 16882-16907 4:01:01                          |
| CCAGATGATCCTACAAACCCCAGCCC                                     |       |       |       |                                      |                                              |
| 16938                                                          | 16999 | 16214 | 18199 | CDS product tegument protein VP11/12 | 16938-16999 9:06:02                          |
| GGCTTACACGGCTACTGGCTACGGGTGGATGTTATGGTTCTTGGACGTTGTGGACGCCAGGG |       |       |       |                                      |                                              |
| 17091                                                          | 17117 | 16214 | 18199 | CDS product tegument protein VP11/12 | 17091-17117 4:01:01                          |
| GGGTCCTGCGGTCTCAGCGGGCACAGG                                    |       |       |       |                                      |                                              |
| 17186                                                          | 17219 | 16214 | 18199 | CDS product tegument protein VP11/12 | 17186-17219 6:03:01                          |
| GGCGAAAGGAAGAGTGGCGGGATGGTTTAAATGG                             |       |       |       |                                      |                                              |
| 17318                                                          | 17330 | 16214 | 18199 | CDS product tegument protein VP11/12 | 17318-17330 4:01:01 GGGGGATGGGGG             |
| 17635                                                          | 17656 | 16214 | 18199 | CDS product tegument protein VP11/12 | 17635-17656 4:01:01 GGGACAGGTATAGGAATTTGG    |
| 17835                                                          | 17855 | 16214 | 18199 | CDS product tegument protein VP11/12 | 17835-17855 4:01:01 GGACATAGGCCATACGGACGG    |
| 19051                                                          | 19070 | 18441 | 19346 | CDS product thymidylate synthase     | 19051-19070 4:01:01 GGGGGATATGGGCCTTGGGG     |

|                                                                                                                                      |       |       |       |                                                 |                      |                              |
|--------------------------------------------------------------------------------------------------------------------------------------|-------|-------|-------|-------------------------------------------------|----------------------|------------------------------|
| 19218                                                                                                                                | 19238 | 18441 | 19346 | CDS product thymidylate synthase                | 19218-19238 4:01:01  | CCCCAAAACCTTTTCCTTGCC        |
| 19310                                                                                                                                | 19322 | 18441 | 19346 | CDS product thymidylate synthase                | 19310-19322 4:01:01  | CCACACCCCCCCC                |
| 19903                                                                                                                                | 19919 | 19431 | 21113 | CDS product envelope glycoprotein C             | 19903-19919 5:02:01  | GGATGGCTGGGGGTGGG            |
| 20016                                                                                                                                | 20043 | 19431 | 21113 | CDS product envelope glycoprotein C             | 20016-20043 5:02:01  | CCGATGTTACCAAACCTTGAAGTCCACC |
| 20680                                                                                                                                | 21015 | 19431 | 21113 | CDS product envelope glycoprotein C             | 20680-21015 56:53:14 |                              |
| GGGTGTTGGCTGCGGGATCGGGCTTTCGGGAAGCGGCCGAGGTGGGCGCGACGGCGGGATCGGGCTTTCGGGTAGCGGCCGAGGTGGGCGCGACGGCGGGATCGGGCTTTCGGGAAGCGGCCGAGGTG     |       |       |       |                                                 |                      |                              |
| GGCGCGACGGCGGGATCGGGCTTTCGGGTAGCGGCCGAGGTGGGCGCGACGGCGGGATCGGGCTTTCGGGAAGCGGCCGAGGTGGGCGCGACGGCGGGATCGGGCTTTCGGGAAGCGGCCGAGGTGGGCGCG |       |       |       |                                                 |                      |                              |
| ACGGCGGGATCGGGCTTTCGGGAAGCGGCCGAGGTGGGCGCGACGGCGGGATCGGGCTTTCGGGTAGCGGCCGAGG                                                         |       |       |       |                                                 |                      |                              |
| 21954                                                                                                                                | 21971 | 21258 | 22478 | CDS product envelope protein UL43               | 21954-21971 4:01:01  | CCTCCCAACCCAGTTCCC           |
| 22667                                                                                                                                | 22682 | 22568 | 23794 | CDS product DNA polymerase processivity subunit | 22667-22682 4:01:01  | CCGATTCCTCCTGCC              |
| 23497                                                                                                                                | 23512 | 22568 | 23794 | CDS product DNA polymerase processivity subunit | 23497-23512 4:01:01  | CCGTCCCTCCGTTGCC             |
| 25242                                                                                                                                | 25265 | 24149 | 25516 | CDS product tegument host shutoff protein       | 25242-25265 5:02:01  |                              |
| CCTTCTGCCACCCTCATCCTCCCC                                                                                                             |       |       |       |                                                 |                      |                              |
| 26063                                                                                                                                | 26083 | 25573 | 26493 | CDS product ribonucleotide reductase subunit 2  | 26063-26083 4:01:01  |                              |
| CCCGTACCTTTTCTTCCAACC                                                                                                                |       |       |       |                                                 |                      |                              |
| 27390                                                                                                                                | 27407 | 26518 | 28845 | CDS product ribonucleotide reductase subunit 1  | 27390-27407 4:01:01  |                              |
| CCCAGCCGCCAGGACCCC                                                                                                                   |       |       |       |                                                 |                      |                              |
| 28617                                                                                                                                | 28647 | 26518 | 28845 | CDS product ribonucleotide reductase subunit 1  | 28617-28647 5:02:01  |                              |
| GGAAACGGATCGTAGGTTAATACGGCAATGG                                                                                                      |       |       |       |                                                 |                      |                              |
| 28744                                                                                                                                | 28763 | 26518 | 28845 | CDS product ribonucleotide reductase subunit 1  | 28744-28763 4:01:01  |                              |
| GGTGTGGTTGATTCTGGGCGG                                                                                                                |       |       |       |                                                 |                      |                              |
| 29054                                                                                                                                | 29078 | 29024 | 30475 | CDS product capsid triplex subunit 1            | 29054-29078 5:02:01  |                              |
| CCCCCCCACACAACCCCTCTAACC                                                                                                             |       |       |       |                                                 |                      |                              |

|                                                   |       |       |       |                                      |
|---------------------------------------------------|-------|-------|-------|--------------------------------------|
| 29099                                             | 29113 | 29024 | 30475 | CDS product capsid triplex subunit 1 |
| 29631                                             | 29651 | 29024 | 30475 | CDS product capsid triplex subunit 1 |
| 29757                                             | 29782 | 29024 | 30475 | CDS product capsid triplex subunit 1 |
| CCGAAAACCTTATGAGCCGCGTTTCC                        |       |       |       |                                      |
| 29905                                             | 29935 | 29024 | 30475 | CDS product capsid triplex subunit 1 |
| CCCCCACCTTCTCCAACGGTCCAAGGAGCC                    |       |       |       |                                      |
| 31826                                             | 31847 | 30759 | 33875 | CDS product tegument protein UL37    |
| 32732                                             | 32754 | 30759 | 33875 | CDS product tegument protein UL37    |
| 32826                                             | 32874 | 30759 | 33875 | CDS product tegument protein UL37    |
| CCGTTGACCTGCTTCCCCAGCACGTCCGTCCTTTGGTTCCTGACCGTCC |       |       |       |                                      |
| 34145                                             | 34167 | 34083 | 42374 | CDS product large tegument protein   |
| 34592                                             | 34613 | 34083 | 42374 | CDS product large tegument protein   |
| 35602                                             | 35622 | 34083 | 42374 | CDS product large tegument protein   |
| 36170                                             | 36192 | 34083 | 42374 | CDS product large tegument protein   |
| 37006                                             | 37031 | 34083 | 42374 | CDS product large tegument protein   |
| 38044                                             | 38062 | 34083 | 42374 | CDS product large tegument protein   |
| 38882                                             | 38911 | 34083 | 42374 | CDS product large tegument protein   |
| GGTACGTTGGACATTCAGGCGGTTGACTGG                    |       |       |       |                                      |
| 39106                                             | 39128 | 34083 | 42374 | CDS product large tegument protein   |
| 39160                                             | 39185 | 34083 | 42374 | CDS product large tegument protein   |
| 39610                                             | 39626 | 34083 | 42374 | CDS product large tegument protein   |
| 40488                                             | 40498 | 34083 | 42374 | CDS product large tegument protein   |
| 41218                                             | 41239 | 34083 | 42374 | CDS product large tegument protein   |

29099-29113 4:01:01 CCTCCGAACCGTTCC  
29631-29651 4:01:01 GGGGACCTTTGGCCACGGCGG  
29757-29782 4:01:01

29905-29935 6:03:01

31826-31847 4:01:01 GGCATTTGGGAAAAGGTCAGG  
32732-32754 4:01:01 CCTTTTACCGGTACACACCCCCC  
32826-32874 8:05:02

34145-34167 4:01:01 GGTGCCCTGGGACCGGCGTCAGG  
34592-34613 4:01:01 GGCCATGGGACTATAGGACAGG  
35602-35622 4:01:01 GGGATTTGTGGTGAAAAATGG  
36170-36192 4:01:01 CCAGAAGTTCCCCAGGAACCCCC  
37006-37031 4:01:01 GGTAACCGGTTTTGTGGGACTTAGGG  
38044-38062 4:01:01 CCACAATCCATATAACCCCC  
38882-38911 5:02:01

39106-39128 5:02:01 GGGGGATATGTTGGCATCGGGGG  
39160-39185 4:01:01 GGCACTCCAGGCATCGGCGTCTGTGG  
39610-39626 4:01:01 GGGGGAGGCGTCTGTGG  
40488-40498 4:01:01 CCCCCCCCCC  
41218-41239 4:01:01 GGATTATGTGGTCTTTTGGGGG



|                                                                            |       |       |       |                                              |                      |                             |
|----------------------------------------------------------------------------|-------|-------|-------|----------------------------------------------|----------------------|-----------------------------|
| 41342                                                                      | 41360 | 34083 | 42374 | CDS product large tegument protein           | 41342-41360 4:01:01  | CCCCAAGGCCCCCAAACC          |
| 41444                                                                      | 41526 | 34083 | 42374 | CDS product large tegument protein           | 41444-41526 12:09:03 |                             |
| CCCGTCCGGCCCGCGCAGCCCGCGCAGCCCGCGCAGCCCGCGCAGACCGTCCAGCCCGCGCAGCCCATAGAACC |       |       |       |                                              |                      |                             |
| 41940                                                                      | 41960 | 34083 | 42374 | CDS product large tegument protein           | 41940-41960 4:01:01  | CCGATGCCCCCAAACGGACC        |
| 42501                                                                      | 42527 | 42431 | 43138 | CDS product small capsid protein             | 42501-42527 6:03:01  | GGGGGTATTTGGGTTGGGGCGGGG    |
| 42546                                                                      | 42577 | 42431 | 43138 | CDS product small capsid protein             | 42546-42577 6:03:01  |                             |
| GGGCCGCGGGCGGTGATCCGGTTGTTGGCTGG                                           |       |       |       |                                              |                      |                             |
| 42671                                                                      | 42689 | 42431 | 43138 | CDS product small capsid protein             | 42671-42689 4:01:01  | GGTGGGGGTGTTGCGGGG          |
| 42793                                                                      | 42813 | 42431 | 43138 | CDS product small capsid protein             | 42793-42813 5:02:01  | GGATGGATTTGGGGTTGTGG        |
| 42943                                                                      | 42965 | 42431 | 43138 | CDS product small capsid protein             | 42943-42965 4:01:01  | GGCACTGGCCGCGGCTCCACGG      |
| 42999                                                                      | 43025 | 42431 | 43138 | CDS product small capsid protein             | 42999-43025 4:01:01  | GGTGACCAGGTTGCAAAGGTCCACTGG |
| 43579                                                                      | 43592 | 43212 | 44021 | CDS product nuclear egress membrane protein  | 43579-43592 4:01:01  | GGAGAGGTCGCGG               |
| 43876                                                                      | 43894 | 43212 | 44021 | CDS product nuclear egress membrane protein  | 43876-43894 4:01:01  | GGGCGGGGGGCGTTGTGG          |
| 44729                                                                      | 44751 | 44506 | 46263 | CDS product DNA packaging protein UL32       | 44729-44751 5:02:01  | GGCCTCTCGGCGGTAGGTGTGG      |
| 45263                                                                      | 45280 | 44506 | 46263 | CDS product DNA packaging protein UL32       | 45263-45280 4:01:01  | GGACGGACTGACTGGAGG          |
| 46152                                                                      | 46175 | 44506 | 46263 | CDS product DNA packaging protein UL32       | 46152-46175 5:02:01  | CCACGCAAACCAACCGCCAATGCC    |
| 46310                                                                      | 46335 | 46190 | 47128 | CDS product nuclear egress lamina protein    | 46310-46335 5:02:01  |                             |
| CCAGAACGCCATGCCGCGTCAAACC                                                  |       |       |       |                                              |                      |                             |
| 47612                                                                      | 47623 | 47052 | 50636 | CDS product DNA polymerase catalytic subunit | 47612-47623 4:01:01  | GGCGGATGGTGG                |
| 47709                                                                      | 47725 | 47052 | 50636 | CDS product DNA polymerase catalytic subunit | 47709-47725 4:01:01  |                             |
| CCAAACCCGGCCATCCC                                                          |       |       |       |                                              |                      |                             |
| 48482                                                                      | 48499 | 47052 | 50636 | CDS product DNA polymerase catalytic subunit | 48482-48499 4:01:01  |                             |
| GGTGGCATAATCGGATGG                                                         |       |       |       |                                              |                      |                             |

|                                                        |       |       |       |                                                 |                     |                  |
|--------------------------------------------------------|-------|-------|-------|-------------------------------------------------|---------------------|------------------|
| 51041                                                  | 51055 | 50857 | 54471 | CDS product single-stranded DNA-binding protein | 51041-51055 4:01:01 | GGCGGTGGTTTCTGG  |
| 51971                                                  | 51993 | 50857 | 54471 | CDS product single-stranded DNA-binding protein | 51971-51993 4:01:01 |                  |
| GGCCGGGGTCATTGGTGCGATGG                                |       |       |       |                                                 |                     |                  |
| 52028                                                  | 52043 | 50857 | 54471 | CDS product single-stranded DNA-binding protein | 52028-52043 4:01:01 | GGTGGAGGATAGCGGG |
| 52058                                                  | 52072 | 50857 | 54471 | CDS product single-stranded DNA-binding protein | 52058-52072 4:01:01 | GGATGGGGGACCGGG  |
| 53061                                                  | 53080 | 50857 | 54471 | CDS product single-stranded DNA-binding protein | 53061-53080 4:01:01 |                  |
| CCTGTATCCGCCCCAAATCC                                   |       |       |       |                                                 |                     |                  |
| 53213                                                  | 53236 | 50857 | 54471 | CDS product single-stranded DNA-binding protein | 53213-53236 4:01:01 |                  |
| GGCAGCCCGGGAAGGCTTGTAGG                                |       |       |       |                                                 |                     |                  |
| 53611                                                  | 53636 | 50857 | 54471 | CDS product single-stranded DNA-binding protein | 53611-53636 4:01:01 |                  |
| CCAGGCGCCCGCGTGACCCATCATCC                             |       |       |       |                                                 |                     |                  |
| 53855                                                  | 53884 | 50857 | 54471 | CDS product single-stranded DNA-binding protein | 53855-53884 6:03:01 |                  |
| GGCAGGGAATTGGAGCGGTTTAAACGGGGG                         |       |       |       |                                                 |                     |                  |
| 53998                                                  | 54012 | 50857 | 54471 | CDS product single-stranded DNA-binding protein | 53998-54012 4:01:01 | CCACCCTATCCGACC  |
| 56456                                                  | 56470 | 54651 | 56963 | CDS product DNA packaging terminase subunit 2   | 56456-56470 4:01:01 | CCCCCTAACACCGCC  |
| 56925                                                  | 56951 | 54651 | 56963 | CDS product DNA packaging terminase subunit 2   | 56925-56951 5:02:01 |                  |
| GGCTGGCTCCGATTCAACGGACCCGG                             |       |       |       |                                                 |                     |                  |
| 57885                                                  | 57900 | 56819 | 59614 | CDS product envelope glycoprotein B             | 57885-57900 4:01:01 | GGTTGGTTGGAAGTGG |
| 58149                                                  | 58164 | 56819 | 59614 | CDS product envelope glycoprotein B             | 58149-58164 4:01:01 | CCAGACCTACCTTGCC |
| 58678                                                  | 58706 | 56819 | 59614 | CDS product envelope glycoprotein B             | 58678-58706 6:03:01 |                  |
| GGGTCCGGGACGGTGGAGGGCCAGCTTGG                          |       |       |       |                                                 |                     |                  |
| 59073                                                  | 59126 | 56819 | 59614 | CDS product envelope glycoprotein B             | 59073-59126 8:05:02 |                  |
| GGGACTTGGGACCGCGGGCCAGGCCGTTGGACATGTGGTTCTTGGGGCCACGGG |       |       |       |                                                 |                     |                  |

|                                                |       |       |       |                                                 |             |                                   |
|------------------------------------------------|-------|-------|-------|-------------------------------------------------|-------------|-----------------------------------|
| 59179                                          | 59224 | 56819 | 59614 | CDS product envelope glycoprotein B             | 59179-59224 | 8:05:02                           |
| GGGGCATTGGCCGTGGGATTATTGGTTTTGGCGGGACTGGTAGCGG |       |       |       |                                                 |             |                                   |
| 59984                                          | 60008 | 59766 | 60197 | CDS product protein V32                         | 59984-60008 | 4:01:01 CCTTTTCGCCTTAACCGCGACAGCC |
| 60944                                          | 60961 | 60321 | 61229 | CDS product capsid scaffold protein             | 60944-60961 | 4:01:01 GGGTGGTGGATATCCCGG        |
| 60957                                          | 60989 | 60321 | 61229 | CDS product capsid scaffold protein             | 60957-60989 | 5:02:01                           |
| CCCGGAAACCGTACGGTCCCCGAAGTGTCCC                |       |       |       |                                                 |             |                                   |
| 61017                                          | 61039 | 60321 | 61229 | CDS product capsid scaffold protein             | 61017-61039 | 6:03:01 GGTGGAAGGCAGGCGGGTGTGG    |
| 61328                                          | 61350 | 60321 | 62138 | CDS product capsid maturation protease          | 61328-61350 | 4:01:01 GGGCCCCCGGGGTGGAATGTGG    |
| 62359                                          | 62375 | 62171 | 63910 | CDS product DNA packaging tegument protein UL25 | 62359-62375 | 4:01:01                           |
| GGCGGCTATGGGTAGGG                              |       |       |       |                                                 |             |                                   |
| 62939                                          | 62953 | 62171 | 63910 | CDS product DNA packaging tegument protein UL25 | 62939-62953 | 4:01:01 GGTGCAGGCGGTAGG           |
| 63419                                          | 63442 | 62171 | 63910 | CDS product DNA packaging tegument protein UL25 | 63419-63442 | 4:01:01                           |
| CCCCTTGCCCTTCCCAAGTACACC                       |       |       |       |                                                 |             |                                   |
| 63597                                          | 63625 | 62171 | 63910 | CDS product DNA packaging tegument protein UL25 | 63597-63625 | 5:02:01                           |
| CCGTCTCAGGAATCCAAAACCTTGCC                     |       |       |       |                                                 |             |                                   |
| 64856                                          | 64876 | 64807 | 65832 | CDS product thymidine kinase                    | 64856-64876 | 4:01:01 GGACGGGCGTATGGAATTGG      |
| 65188                                          | 65207 | 64807 | 65832 | CDS product thymidine kinase                    | 65188-65207 | 4:01:01 CCGACCGACACCCAATCGCC      |
| 65289                                          | 65309 | 64807 | 65832 | CDS product thymidine kinase                    | 65289-65309 | 4:01:01 CCCGCTGAACCCCCGGGACC      |
| 66528                                          | 66541 | 66074 | 68599 | CDS product envelope glycoprotein H             | 66528-66541 | 4:01:01 CCCACCAAACCCCC            |
| 66958                                          | 66980 | 66074 | 68599 | CDS product envelope glycoprotein H             | 66958-66980 | 5:02:01 CCACCGGTCCGGATCCGGGGCC    |
| 67098                                          | 67119 | 66074 | 68599 | CDS product envelope glycoprotein H             | 67098-67119 | 4:01:01 GGCCACACGGAGGCTCTGCGG     |
| 68354                                          | 68375 | 66074 | 68599 | CDS product envelope glycoprotein H             | 68354-68375 | 4:01:01 CCACAATTCCACCCTTCAATCC    |
| 68500                                          | 68544 | 66074 | 68599 | CDS product envelope glycoprotein H             | 68500-68544 | 8:05:02                           |

GGAGGGGCGTTTCTGGCGGTAGTGGGGTTTGGTATTATCGGATGG

|       |       |       |       |                                   |
|-------|-------|-------|-------|-----------------------------------|
| 69030 | 69047 | 68668 | 70293 | CDS product tegument protein UL21 |
| 69068 | 69094 | 68668 | 70293 | CDS product tegument protein UL21 |
| 69317 | 69336 | 68668 | 70293 | CDS product tegument protein UL21 |
| 69831 | 69854 | 68668 | 70293 | CDS product tegument protein UL21 |
| 69890 | 69900 | 68668 | 70293 | CDS product tegument protein UL21 |
| 69992 | 70008 | 68668 | 70293 | CDS product tegument protein UL21 |
| 71273 | 71292 | 70687 | 71355 | CDS product envelope protein UL20 |
| 72382 | 72406 | 71540 | 75730 | CDS product major capsid protein  |
| 72613 | 72639 | 71540 | 75730 | CDS product major capsid protein  |
| 73062 | 73087 | 71540 | 75730 | CDS product major capsid protein  |
| 73098 | 73120 | 71540 | 75730 | CDS product major capsid protein  |
| 73257 | 73296 | 71540 | 75730 | CDS product major capsid protein  |

CCTTCCCGGACCGCAGCGTCCCCCGGAAGCCATGCCAACC

|       |       |       |       |                                  |
|-------|-------|-------|-------|----------------------------------|
| 73832 | 73851 | 71540 | 75730 | CDS product major capsid protein |
| 73984 | 74005 | 71540 | 75730 | CDS product major capsid protein |
| 74156 | 74186 | 71540 | 75730 | CDS product major capsid protein |

CCCCAACTACCCAGAAGATCCAAGACACCC

|       |       |       |       |                                  |
|-------|-------|-------|-------|----------------------------------|
| 74534 | 74554 | 71540 | 75730 | CDS product major capsid protein |
| 74557 | 74570 | 71540 | 75730 | CDS product major capsid protein |
| 74604 | 74620 | 71540 | 75730 | CDS product major capsid protein |
| 75070 | 75087 | 71540 | 75730 | CDS product major capsid protein |
| 75161 | 75181 | 71540 | 75730 | CDS product major capsid protein |

|             |         |                              |
|-------------|---------|------------------------------|
| 69030-69047 | 4:01:01 | GGGAAGCTGGGGGAGTGG           |
| 69068-69094 | 4:01:01 | CCAACGTGCCAATAAAGCCCACTTCCC  |
| 69317-69336 | 4:01:01 | CCCCCGTTCCCATATACC           |
| 69831-69854 | 5:02:01 | GGTATTAATGGCGGTGGGTGTTGG     |
| 69890-69900 | 4:01:01 | CCCCGCCACC                   |
| 69992-70008 | 5:02:01 | CCACCGCCCCGATCCC             |
| 71273-71292 | 4:01:01 | GGACTGTTTGGTGACACGG          |
| 72382-72406 | 5:02:01 | GGACGGCAGGTTGACGGTGTGTTGG    |
| 72613-72639 | 5:02:01 | CCGTCTATACCCCCACAATCCAACCTCC |
| 73062-73087 | 4:01:01 | GGCCGAGGGTACAGAGGACACATTGG   |
| 73098-73120 | 4:01:01 | GGGGAGGTTTATGGAAACGTGGG      |
| 73257-73296 | 8:05:02 |                              |

|             |         |                        |
|-------------|---------|------------------------|
| 73832-73851 | 4:01:01 | CCGCCCAGACCGACTCCCC    |
| 73984-74005 | 4:01:01 | CCCATTACTCCACACCATGACC |
| 74156-74186 | 4:01:01 |                        |

|             |         |                       |
|-------------|---------|-----------------------|
| 74534-74554 | 4:01:01 | GGCGGGTTTTGGCAAAAATGG |
| 74557-74570 | 4:01:01 | CCACCAATCCCTCC        |
| 74604-74620 | 4:01:01 | CCAACCCGTTGCCTACC     |
| 75070-75087 | 4:01:01 | CCCACCGAACCCTACCC     |
| 75161-75181 | 4:01:01 | CCATGCCGGTGTCCACTGACC |

|                               |       |       |       |                                                      |                                             |
|-------------------------------|-------|-------|-------|------------------------------------------------------|---------------------------------------------|
| 75477                         | 75493 | 71540 | 75730 | CDS product major capsid protein                     | 75477-75493 4:01:01 GGAGGCAAAGGCTGTGG       |
| 76253                         | 76274 | 75847 | 76797 | CDS product capsid triplex subunit 2                 | 76253-76274 5:02:01 CCCTTTAACCATCCCCAGACC   |
| 76426                         | 76443 | 75847 | 76797 | CDS product capsid triplex subunit 2                 | 76426-76443 4:01:01 GGGACGGATCGGATGCGG      |
| 77633                         | 77653 | 76851 | 82593 | CDS product DNA packaging terminase subunit 1        | 77633-77653 4:01:01                         |
| CCGGTCAAACCCACACCCC           |       |       |       |                                                      |                                             |
| 78920                         | 78938 | 78170 | 80200 | CDS product DNA packaging tegument protein UL17      | 78920-78938 4:01:01                         |
| CCAGGCACCCGTCCGACC            |       |       |       |                                                      |                                             |
| 79091                         | 79106 | 78170 | 80200 | CDS product DNA packaging tegument protein UL17      | 79091-79106 4:01:01 CCGCCAGCATCCCACC        |
| 79478                         | 79506 | 78170 | 80200 | CDS product DNA packaging tegument protein UL17      | 79478-79506 6:03:01                         |
| CCCCCTTACCCGCCTTTAAACCAGGCGCC |       |       |       |                                                      |                                             |
| 79895                         | 79917 | 78170 | 80200 | CDS product DNA packaging tegument protein UL17      | 79895-79917 4:01:01                         |
| CCAAGGTCCCGTTCCCGTAGCC        |       |       |       |                                                      |                                             |
| 80262                         | 80276 | 76851 | 82593 | CDS product DNA packaging terminase subunit 1        | 80262-80276 4:01:01 CCCGTTTCCACCCCC         |
| 80477                         | 80494 | 80360 | 81451 | CDS product tegument protein UL16                    | 80477-80494 4:01:01 CCATCCTGACCGATCCCC      |
| 80851                         | 80873 | 80360 | 81451 | CDS product tegument protein UL16                    | 80851-80873 4:01:01 CCCCCGCGGCTCCGAAAAATCC  |
| 80977                         | 80999 | 80360 | 81451 | CDS product tegument protein UL16                    | 80977-80999 4:01:01 GGATGGCATGCTCGGATACTTGG |
| 81137                         | 81157 | 80360 | 81451 | CDS product tegument protein UL16                    | 81137-81157 4:01:01 GGAGAAAGCCGTCAGCGGG     |
| 83185                         | 83197 | 82719 | 83318 | CDS product tegument protein UL14                    | 83185-83197 4:01:01 CCCCCAACCTCC            |
| 83573                         | 83598 | 83168 | 84700 | CDS product tegument serine/threonine protein kinase | 83573-83598 4:01:01                         |
| GGTTTGCGGGACGGGAACGTATGGG     |       |       |       |                                                      |                                             |
| 84668                         | 84689 | 83168 | 84700 | CDS product tegument serine/threonine protein kinase | 84668-84689 4:01:01                         |
| GGCACGATCGGGATTGGATAGG        |       |       |       |                                                      |                                             |
| 84701                         | 84713 | 84667 | 86322 | CDS product deoxyribonuclease                        | 84701-84713 4:01:01 CCCCCAGCCAGCC           |

|                               |       |       |       |                                                     |                                                |
|-------------------------------|-------|-------|-------|-----------------------------------------------------|------------------------------------------------|
| 84961                         | 84985 | 84667 | 86322 | CDS product deoxyribonuclease                       | 84961-84985 4:01:01 CCACACAGCCTCAGGAGCCGCGTCC  |
| 85191                         | 85216 | 84667 | 86322 | CDS product deoxyribonuclease                       | 85191-85216 5:02:01 GGTGATGCGGCGCAATGGCGTTTGG  |
| 85737                         | 85755 | 84667 | 86322 | CDS product deoxyribonuclease                       | 85737-85755 4:01:01 GGATTTAAAGGTGGGAGGG        |
| 86246                         | 86265 | 86226 | 86471 | CDS product myristylated tegument protein           | 86246-86265 4:01:01 GGTCGAGGAGGAATCTGTGG       |
| 87065                         | 87090 | 86575 | 87882 | CDS product envelope glycoprotein M                 | 87065-87090 4:01:01 CCACGGACACCGATGACCACAGTCCC |
| 87515                         | 87540 | 86575 | 87882 | CDS product envelope glycoprotein M                 | 87515-87540 5:02:01 CCGCCATGGCCATTGCCGTTAAAGCC |
| 87601                         | 87629 | 86575 | 87882 | CDS product envelope glycoprotein M                 | 87601-87629 6:03:01                            |
| CCACCTCTATTTCCGGACCATAACCCCCC |       |       |       |                                                     |                                                |
| 87952                         | 87972 | 87881 | 90388 | CDS product DNA replication origin-binding helicase | 87952-87972 4:01:01                            |
| GGAGGGGATCTGGTTTCGTGG         |       |       |       |                                                     |                                                |
| 88939                         | 88957 | 87881 | 90388 | CDS product DNA replication origin-binding helicase | 88939-88957 4:01:01                            |
| GGGCCGGATATGGTATCGG           |       |       |       |                                                     |                                                |
| 89289                         | 89309 | 87881 | 90388 | CDS product DNA replication origin-binding helicase | 89289-89309 4:01:01                            |
| GGTTGTATTGGATGGCATGGG         |       |       |       |                                                     |                                                |
| 90339                         | 90367 | 87881 | 90388 | CDS product DNA replication origin-binding helicase | 90339-90367 5:02:01                            |
| GGGATCGTGGCCGCGGATAAACGGGGCGG |       |       |       |                                                     |                                                |
| 91051                         | 91067 | 90493 | 92808 | CDS product helicase-primase subunit                | 91051-91067 4:01:01 CCTACGCCCCGCTGACC          |
| 91348                         | 91377 | 90493 | 92808 | CDS product helicase-primase subunit                | 91348-91377 5:02:01                            |
| GGTACGCGGCGCGTTTGAAAAACCCGGG  |       |       |       |                                                     |                                                |
| 91532                         | 91550 | 90493 | 92808 | CDS product helicase-primase subunit                | 91532-91550 4:01:01 GGAAACGGATGGGTGTGG         |
| 91602                         | 91615 | 90493 | 92808 | CDS product helicase-primase subunit                | 91602-91615 4:01:01 CCCCCCTTACCTCC             |
| 92148                         | 92169 | 90493 | 92808 | CDS product helicase-primase subunit                | 92148-92169 4:01:01 CCGCCATGGAACCGGTACTCC      |
| 92156                         | 92179 | 90493 | 92808 | CDS product helicase-primase subunit                | 92156-92179 4:01:01 GGAACCGGTACTCCGGGTCGAGGG   |

|                                |       |       |       |                                               |                     |                           |
|--------------------------------|-------|-------|-------|-----------------------------------------------|---------------------|---------------------------|
| 92592                          | 92611 | 90493 | 92808 | CDS product helicase-primase subunit          | 92592-92611 4:01:01 | CCCAACCCACATGGACCTCC      |
| 93017                          | 93043 | 92855 | 93850 | CDS product tegument protein UL7              | 93017-93043 6:03:01 | GGACAGGGGGGGTCCGTGGGGCAGG |
| 93309                          | 93331 | 92855 | 93850 | CDS product tegument protein UL7              | 93309-93331 4:01:01 | CCCCGAGGGCCCAATGCCTTCC    |
| 93420                          | 93437 | 92855 | 93850 | CDS product tegument protein UL7              | 93420-93437 4:01:01 | CCCCACCGTATACACCC         |
| 93626                          | 93643 | 92855 | 93850 | CDS product tegument protein UL7              | 93626-93643 4:01:01 | CCGTTACCTCCGCGCC          |
| 93776                          | 93807 | 92855 | 93850 | CDS product tegument protein UL7              | 93776-93807 6:03:01 |                           |
| CCGGACATCCCATCGGCATCCCCGCGCTCC |       |       |       |                                               |                     |                           |
| 94732                          | 94751 | 93675 | 95984 | CDS product capsid portal protein             | 94732-94751 5:02:01 | CCACCGATCCACTTCCTTCC      |
| 95020                          | 95040 | 93675 | 95984 | CDS product capsid portal protein             | 95020-95040 4:01:01 | CCAACACCTCCCCAGAAAGCC     |
| 95233                          | 95249 | 93675 | 95984 | CDS product capsid portal protein             | 95233-95249 4:01:01 | CCGCCGCTCCTCTGGCC         |
| 95406                          | 95425 | 93675 | 95984 | CDS product capsid portal protein             | 95406-95425 4:01:01 | CCGACCCTTCCATTAAACC       |
| 95792                          | 95807 | 93675 | 95984 | CDS product capsid portal protein             | 95792-95807 4:01:01 | CCAGCCATCTTCCTCC          |
| 96570                          | 96590 | 95996 | 98641 | CDS product helicase-primase helicase subunit | 96570-96590 5:02:01 |                           |
| GGGGGACGACGGTCGCGGAGG          |       |       |       |                                               |                     |                           |
| 97767                          | 97788 | 95996 | 98641 | CDS product helicase-primase helicase subunit | 97767-97788 4:01:01 |                           |
| GGTTAATGGGGCGGTGCCGGG          |       |       |       |                                               |                     |                           |
| 97838                          | 97854 | 95996 | 98641 | CDS product helicase-primase helicase subunit | 97838-97854 4:01:01 |                           |
| CCAAAGCCCCCGAGTCC              |       |       |       |                                               |                     |                           |
| 97865                          | 97883 | 95996 | 98641 | CDS product helicase-primase helicase subunit | 97865-97883 4:01:01 |                           |
| CCTCCATACCCGAAGACCC            |       |       |       |                                               |                     |                           |
| 98367                          | 98393 | 95996 | 98641 | CDS product helicase-primase helicase subunit | 98367-98393 5:02:01 |                           |
| GGCAATGGCCACCACGGTGGAATATGG    |       |       |       |                                               |                     |                           |
| 98751                          | 98771 | 98712 | 99302 | CDS product nuclear protein UL4               | 98751-98771 4:01:01 | GGTTACATGGGGTTAGGCGGG     |

99159 99182 98712 99302 CDS product nuclear protein UL4  
 99206 99241 98712 99302 CDS product nuclear protein UL4  
 CCTGAAACCAACTGTCCTTCTTCACCACAACCGGCC  
 99989 100003 99607 100272 CDS product nuclear protein UL3  
 100243 100256 99607 100272 CDS product nuclear protein UL3  
 100386 100408 100302 101219 CDS product uracil-DNA glycosylase  
 100534 100549 100302 101219 CDS product uracil-DNA glycosylase  
 100612 100642 100302 101219 CDS product uracil-DNA glycosylase  
 CCCCTGCCTTGCCCAACTCTCCAGGCATCC  
 101107 101130 100302 101219 CDS product uracil-DNA glycosylase  
 101462 101496 101170 101649 CDS product envelope glycoprotein L  
 CCGGGGTGCCGCATAGTCCCACGCCTCATATACC  
 103174 103193 103082 104485 CDS product ubiquitin E3 ligase ICPO  
 103420 103446 103082 104485 CDS product ubiquitin E3 ligase ICPO  
 GGTCTCCCGGTTGAGGTGGTTTCTGG  
 103492 103526 103082 104485 CDS product ubiquitin E3 ligase ICPO  
 GGTCCAGGTTTGCATGGTTAGGCGGTTGGATCGG  
 103848 103862 103082 104485 CDS product ubiquitin E3 ligase ICPO  
 103889 103909 103082 104485 CDS product ubiquitin E3 ligase ICPO  
 CCATACACCACGGGGTCGCC  
 104147 104163 103082 104485 CDS product ubiquitin E3 ligase ICPO  
 104306 104342 103082 104485 CDS product ubiquitin E3 ligase ICPO  
 GGACACCGGCAGAGAGGACACTGGACGCTGGTGGAGG

99159-99182 5:02:01 CCACACCAACACCAACCCCGCACC  
 99206-99241 6:03:01  
 99989-100003 4:01:01 GGCGGATGGTGTCTGG  
 100243-100256 4:01:01 GGTACGGAAGGAGG  
 100386-100408 4:01:01 GGAACACGGGACAATGGCGACGG  
 100534-100549 5:02:01 CCAGCCGCCCCAGCC  
 100612-100642 6:03:01  
 101107-101130 4:01:01 GGGTTTTTTTGGTAACCGGATGGG  
 101462-101496 5:02:01  
 103174-103193 6:03:01 GGAGGTGGAGGGGGTATTGG  
 103420-103446 5:02:01  
 103492-103526 7:04:01  
 103848-103862 4:01:01 CCTGCCCCCGGTCC  
 103889-103909 4:01:01  
 104147-104163 4:01:01 GGTCTGGGCTTGGTGG  
 104306-104342 7:04:01



|        |        |        |        |                                                                                                       |               |                          |
|--------|--------|--------|--------|-------------------------------------------------------------------------------------------------------|---------------|--------------------------|
| 105224 | 105243 | 105201 | 109133 | CDS product transcriptional regulator ICP4<br>CCTCCCCCGCGCCCTCCCC                                     | 105224-105243 | 5:02:01                  |
| 105263 | 105279 | 105201 | 109133 | CDS product transcriptional regulator ICP4<br>GGAGGACGAGGACGAGG                                       | 105263-105279 | 4:01:01                  |
| 105289 | 105302 | 105201 | 109133 | CDS product transcriptional regulator ICP4                                                            | 105289-105302 | 4:01:01 CCACCTTGACCGCC   |
| 105374 | 105417 | 105201 | 109133 | CDS product transcriptional regulator ICP4<br>CCCCGGTGCGTCCCCGTCGTCCCCGCCCCCTCCTCGCTGTCCC             | 105374-105417 | 7:04:01                  |
| 105431 | 105455 | 105201 | 109133 | CDS product transcriptional regulator ICP4<br>CCCCACCTCCCAATCGTCCAGCTCC                               | 105431-105455 | 5:02:01                  |
| 105515 | 105538 | 105201 | 109133 | CDS product transcriptional regulator ICP4<br>CCGTTCCGAGCCCCCGTGGTGTCC                                | 105515-105538 | 5:02:01                  |
| 105548 | 105603 | 105201 | 109133 | CDS product transcriptional regulator ICP4<br>CCGTGTTCCGTCGCTCCCCTCCAACACCGTCTCCGCGGCCCAAAACCGGGCGGCC | 105548-105603 | 9:06:02                  |
| 105614 | 105630 | 105201 | 109133 | CDS product transcriptional regulator ICP4<br>GGGAATCGGGGGGAGGG                                       | 105614-105630 | 4:01:01                  |
| 105635 | 105650 | 105201 | 109133 | CDS product transcriptional regulator ICP4                                                            | 105635-105650 | 4:01:01 CCGAGCCTCGTCCGCC |
| 105664 | 105680 | 105201 | 109133 | CDS product transcriptional regulator ICP4<br>CCACCGACCGACCGGCC                                       | 105664-105680 | 5:02:01                  |
| 105699 | 105718 | 105201 | 109133 | CDS product transcriptional regulator ICP4<br>GGTTCTGCGGCAGGGTCGGG                                    | 105699-105718 | 4:01:01                  |
| 105768 | 105803 | 105201 | 109133 | CDS product transcriptional regulator ICP4<br>CCGGCCTCCGGCCCCGGCGGCCCGGTCTCCGTCCC                     | 105768-105803 | 8:05:02                  |
| 105770 | 105793 | 105201 | 109133 | CDS product transcriptional regulator ICP4                                                            | 105770-105793 | 5:02:01                  |

|                                                                        |               |                          |
|------------------------------------------------------------------------|---------------|--------------------------|
| GGCCTCCGGCCCGGCGCCCCCGG                                                |               |                          |
| 105967 106023 105201 109133 CDS product transcriptional regulator ICP4 | 105967-106023 | 8:05:02                  |
| GGTATTACGGGGCGACAGGGGACGCGGGTCTTGGGGCCCGCGGGGTACACACGG                 |               |                          |
| 106179 106223 105201 109133 CDS product transcriptional regulator ICP4 | 106179-106223 | 7:04:01                  |
| GGCCATCGGACGACGGCCTGGGCGTCCGGTCGCGCCGGGGCCCGG                          |               |                          |
| 106195 106221 105201 109133 CDS product transcriptional regulator ICP4 | 106195-106221 | 4:01:01                  |
| CCTGGGCGTCCGGTCGCGCCGGGGCCC                                            |               |                          |
| 106254 106269 105201 109133 CDS product transcriptional regulator ICP4 | 106254-106269 | 4:01:01 CCATCCCTGGGCCACC |
| 106279 106308 105201 109133 CDS product transcriptional regulator ICP4 | 106279-106308 | 6:03:01                  |
| CCACCGCGTCCAACACCAGCAACCGGCGCC                                         |               |                          |
| 106343 106368 105201 109133 CDS product transcriptional regulator ICP4 | 106343-106368 | 5:02:01                  |
| GGCCCCGGCAAAGGCCAGGTCTCGGG                                             |               |                          |
| 106411 106437 105201 109133 CDS product transcriptional regulator ICP4 | 106411-106437 | 5:02:01                  |
| CCGGCGGGCCGGTCCAGTTCCCGGCC                                             |               |                          |
| 106452 106484 105201 109133 CDS product transcriptional regulator ICP4 | 106452-106484 | 5:02:01                  |
| GGCAGGCACAACCGTTACTCAGGGCTGCCAGG                                       |               |                          |
| 106628 106647 105201 109133 CDS product transcriptional regulator ICP4 | 106628-106647 | 4:01:01                  |
| CCGCATCCAGGCGCACCTCC                                                   |               |                          |
| 106692 106707 105201 109133 CDS product transcriptional regulator ICP4 | 106692-106707 | 4:01:01 CCTCCGCCCCGACGCC |
| 106752 106778 105201 109133 CDS product transcriptional regulator ICP4 | 106752-106778 | 4:01:01                  |
| GGGCGCCAGGCCGTGGGAAACAATGGG                                            |               |                          |
| 106792 106809 105201 109133 CDS product transcriptional regulator ICP4 | 106792-106809 | 4:01:01                  |
| GGGCGATGGTTTCGGGGG                                                     |               |                          |

|        |        |        |        |                                                                                    |               |         |                |
|--------|--------|--------|--------|------------------------------------------------------------------------------------|---------------|---------|----------------|
| 106819 | 106844 | 105201 | 109133 | CDS product transcriptional regulator ICP4<br>CCTTGCGAGCCTGGTCCGACGGGACC           | 106819-106844 | 4:01:01 |                |
| 106831 | 106867 | 105201 | 109133 | CDS product transcriptional regulator ICP4<br>GGTCCGACGGGACCGGGGTATGCAGGGCCCCCGGGG | 106831-106867 | 5:02:01 |                |
| 106941 | 106968 | 105201 | 109133 | CDS product transcriptional regulator ICP4<br>GGGCCCAGAGGTGATGGTCACGGGCTCGG        | 106941-106968 | 5:02:01 |                |
| 106972 | 106994 | 105201 | 109133 | CDS product transcriptional regulator ICP4<br>CCCGCCTCTTGGCCTTGAAACC               | 106972-106994 | 4:01:01 |                |
| 107138 | 107161 | 105201 | 109133 | CDS product transcriptional regulator ICP4<br>GGCGGCCGACGGCTGAGGGTCGGG             | 107138-107161 | 5:02:01 |                |
| 107171 | 107202 | 105201 | 109133 | CDS product transcriptional regulator ICP4<br>GGCCGGGGTTGTTGGAGAAGGGTGACCGCGGG     | 107171-107202 | 5:02:01 |                |
| 107324 | 107342 | 105201 | 109133 | CDS product transcriptional regulator ICP4<br>GGCCGCGGCCGCGTGGGGG                  | 107324-107342 | 4:01:01 |                |
| 107347 | 107369 | 105201 | 109133 | CDS product transcriptional regulator ICP4<br>CCCAGAGGGCCTCCCCGTGGCC               | 107347-107369 | 5:02:01 |                |
| 107644 | 107663 | 105201 | 109133 | CDS product transcriptional regulator ICP4<br>CCTCATCCTCCCAGTGACCC                 | 107644-107663 | 4:01:01 |                |
| 107674 | 107697 | 105201 | 109133 | CDS product transcriptional regulator ICP4<br>CCCCGGACGGTCCAAACCGCACCC             | 107674-107697 | 4:01:01 |                |
| 107766 | 107799 | 105201 | 109133 | CDS product transcriptional regulator ICP4<br>GGGGGAATTATCGGGGTCTGGATCGCGGCAGGG    | 107766-107799 | 6:03:01 |                |
| 108268 | 108281 | 105201 | 109133 | CDS product transcriptional regulator ICP4                                         | 108268-108281 | 4:01:01 | CCGCCTTTGCCCCC |

|                                              |        |        |        |                                                 |               |         |                        |
|----------------------------------------------|--------|--------|--------|-------------------------------------------------|---------------|---------|------------------------|
| 108327                                       | 108349 | 105201 | 109133 | CDS product transcriptional regulator ICP4      | 108327-108349 | 4:01:01 |                        |
| GGGCCGGGTACAGGTCCACCGG                       |        |        |        |                                                 |               |         |                        |
| 108342                                       | 108359 | 105201 | 109133 | CDS product transcriptional regulator ICP4      | 108342-108359 | 4:01:01 |                        |
| CCACCGGGTTCCGCGCC                            |        |        |        |                                                 |               |         |                        |
| 108621                                       | 108666 | 105201 | 109133 | CDS product transcriptional regulator ICP4      | 108621-108666 | 8:05:02 |                        |
| GGAGACGCGGGGATACAGGGAGAAGGCCTGCGGGAACGGAGGGG |        |        |        |                                                 |               |         |                        |
| 108834                                       | 108854 | 105201 | 109133 | CDS product transcriptional regulator ICP4      | 108834-108854 | 4:01:01 |                        |
| CCCATTAGATCCTGACCGTCC                        |        |        |        |                                                 |               |         |                        |
| 108955                                       | 108982 | 105201 | 109133 | CDS product transcriptional regulator ICP4      | 108955-108982 | 5:02:01 |                        |
| CCCGTCCCACCATGACCCCGTTCTCTCC                 |        |        |        |                                                 |               |         |                        |
| 109039                                       | 109073 | 105201 | 109133 | CDS product transcriptional regulator ICP4      | 109039-109073 | 6:03:01 |                        |
| CCGCCGCGCCGCGTCCAACAGGTCCATTA ACTCC          |        |        |        |                                                 |               |         |                        |
| 111244                                       | 111272 | 110581 | 111417 | CDS product regulatory protein ICP22            | 111244-111272 | 4:01:01 |                        |
| CCCCGTCCCCAAAGAGACCCAGCGTGCC                 |        |        |        |                                                 |               |         |                        |
| 111763                                       | 111777 | 111565 | 112107 | CDS product virion protein US10                 | 111763-111777 | 4:01:01 | GGGGGAGGGCAAAGG        |
| 111825                                       | 111846 | 111565 | 112107 | CDS product virion protein US10                 | 111825-111846 | 5:02:01 | CCACCCTCGGTTCCGCCGATCC |
| 112603                                       | 112619 | 112332 | 112640 | CDS product membrane protein US9                | 112603-112619 | 4:01:01 | CCACGGCCTCACCTCC       |
| 113748                                       | 113766 | 113037 | 114218 | CDS product serine/threonine protein kinase US3 | 113748-113766 | 4:01:01 |                        |
| GGTATTATGGCTGGGCTGG                          |        |        |        |                                                 |               |         |                        |
| 114179                                       | 114198 | 113037 | 114218 | CDS product serine/threonine protein kinase US3 | 114179-114198 | 4:01:01 |                        |
| CCCGATCCATATCCAAATCC                         |        |        |        |                                                 |               |         |                        |
| 115101                                       | 115131 | 114496 | 115560 | CDS product envelope glycoprotein I             | 115101-115131 | 5:02:01 |                        |
| CCCGCGACACCCAAAGGGTCCGGTACCTCCC              |        |        |        |                                                 |               |         |                        |

|                                               |        |        |        |                                            |               |         |                           |
|-----------------------------------------------|--------|--------|--------|--------------------------------------------|---------------|---------|---------------------------|
| 115830                                        | 115853 | 115808 | 117679 | CDS product envelope glycoprotein E        | 115830-115853 | 5:02:01 | GGTGGGGGTATTGATGGGGTTTCGG |
| 116175                                        | 116198 | 115808 | 117679 | CDS product envelope glycoprotein E        | 116175-116198 | 4:01:01 | GGAGGATCTTGGGGACGATACGGG  |
| 116496                                        | 116518 | 115808 | 117679 | CDS product envelope glycoprotein E        | 116496-116518 | 5:02:01 | GGTGGTGGATGTGGATTGCGCGG   |
| 117334                                        | 117356 | 115808 | 117679 | CDS product envelope glycoprotein E        | 117334-117356 | 5:02:01 | CCGCCAACGGCCGGTCAGCCACC   |
| 117579                                        | 117601 | 115808 | 117679 | CDS product envelope glycoprotein E        | 117579-117601 | 4:01:01 | GGACTCGGAATCTACGGATACGG   |
| 117625                                        | 117641 | 115808 | 117679 | CDS product envelope glycoprotein E        | 117625-117641 | 4:01:01 | GGAGGGAGTCACGGGGG         |
| 118049                                        | 118070 | 117790 | 118332 | CDS product virion protein US10            | 118049-118070 | 5:02:01 | GGATCGGCGGAACCGAGGGTGG    |
| 118118                                        | 118132 | 117790 | 118332 | CDS product virion protein US10            | 118118-118132 | 4:01:01 | CCTTTGCCCTCCCC            |
| 118623                                        | 118651 | 118480 | 119316 | CDS product regulatory protein ICP22       | 118623-118651 | 4:01:01 |                           |
| GGCACGCTGGGGTCTCTTTGGGACGGGG                  |        |        |        |                                            |               |         |                           |
| 120822                                        | 120856 | 120764 | 124696 | CDS product transcriptional regulator ICP4 | 120822-120856 | 6:03:01 |                           |
| GGAGTTAATGGACCTGTTGGACGCGGCCGCGCGG            |        |        |        |                                            |               |         |                           |
| 120913                                        | 120940 | 120764 | 124696 | CDS product transcriptional regulator ICP4 | 120913-120940 | 5:02:01 |                           |
| GGAGAGAACGGGGTCATGGTGGGACGGG                  |        |        |        |                                            |               |         |                           |
| 121041                                        | 121061 | 120764 | 124696 | CDS product transcriptional regulator ICP4 | 121041-121061 | 4:01:01 |                           |
| GGACGGTCAGGATCTAATGGG                         |        |        |        |                                            |               |         |                           |
| 121229                                        | 121274 | 120764 | 124696 | CDS product transcriptional regulator ICP4 | 121229-121274 | 8:05:02 |                           |
| CCCCTCCGTTCCCGCAGGCCTTCTCCCCTGTATCCCCGCGTCTCC |        |        |        |                                            |               |         |                           |
| 121536                                        | 121553 | 120764 | 124696 | CDS product transcriptional regulator ICP4 | 121536-121553 | 4:01:01 |                           |
| GGCGCGGAAACCCGGTGG                            |        |        |        |                                            |               |         |                           |
| 121546                                        | 121568 | 120764 | 124696 | CDS product transcriptional regulator ICP4 | 121546-121568 | 4:01:01 |                           |
| CCCGGTGGACCTGTACCCGCCCC                       |        |        |        |                                            |               |         |                           |
| 121614                                        | 121627 | 120764 | 124696 | CDS product transcriptional regulator ICP4 | 121614-121627 | 4:01:01 | GGGGGCAAAGGCGG            |

|                                       |        |        |        |                                            |               |         |
|---------------------------------------|--------|--------|--------|--------------------------------------------|---------------|---------|
| 122096                                | 122129 | 120764 | 124696 | CDS product transcriptional regulator ICP4 | 122096-122129 | 6:03:01 |
| CCCTGCCGCGATCCAGAACCCCGATAATTCCCCC    |        |        |        |                                            |               |         |
| 122198                                | 122221 | 120764 | 124696 | CDS product transcriptional regulator ICP4 | 122198-122221 | 4:01:01 |
| GGGTGCGGTTTGGACCGTCCGGGG              |        |        |        |                                            |               |         |
| 122232                                | 122251 | 120764 | 124696 | CDS product transcriptional regulator ICP4 | 122232-122251 | 4:01:01 |
| GGGTCACTGGGAGGATGAGG                  |        |        |        |                                            |               |         |
| 122526                                | 122548 | 120764 | 124696 | CDS product transcriptional regulator ICP4 | 122526-122548 | 5:02:01 |
| GGCCACGGGGGAGGCCCTCTGGG               |        |        |        |                                            |               |         |
| 122553                                | 122571 | 120764 | 124696 | CDS product transcriptional regulator ICP4 | 122553-122571 | 4:01:01 |
| CCCCACGCGGCCGCGGCC                    |        |        |        |                                            |               |         |
| 122693                                | 122724 | 120764 | 124696 | CDS product transcriptional regulator ICP4 | 122693-122724 | 5:02:01 |
| CCCGCGGTCACCCTTCTCCAACAACCCCGGCC      |        |        |        |                                            |               |         |
| 122734                                | 122757 | 120764 | 124696 | CDS product transcriptional regulator ICP4 | 122734-122757 | 5:02:01 |
| CCCGACCCTCAGCCGTCGGCCGCC              |        |        |        |                                            |               |         |
| 122901                                | 122923 | 120764 | 124696 | CDS product transcriptional regulator ICP4 | 122901-122923 | 4:01:01 |
| GGTTTCCAAGCCAAGAGGCGGG                |        |        |        |                                            |               |         |
| 122927                                | 122954 | 120764 | 124696 | CDS product transcriptional regulator ICP4 | 122927-122954 | 5:02:01 |
| CCGAGCCCGTGACCATCACCTCGGGCCC          |        |        |        |                                            |               |         |
| 123028                                | 123064 | 120764 | 124696 | CDS product transcriptional regulator ICP4 | 123028-123064 | 5:02:01 |
| CCCCGGGGGGCCCTGCATACCCCGGTCCCGTCGGACC |        |        |        |                                            |               |         |
| 123051                                | 123076 | 120764 | 124696 | CDS product transcriptional regulator ICP4 | 123051-123076 | 4:01:01 |
| GGTCCCGTCGGACCAGGCTCGCAAGG            |        |        |        |                                            |               |         |
| 123086                                | 123103 | 120764 | 124696 | CDS product transcriptional regulator ICP4 | 123086-123103 | 4:01:01 |

|                                                       |        |        |        |                                            |               |         |                  |
|-------------------------------------------------------|--------|--------|--------|--------------------------------------------|---------------|---------|------------------|
| CCCCCGAAACCATCGCCC                                    |        |        |        |                                            |               |         |                  |
| 123117                                                | 123143 | 120764 | 124696 | CDS product transcriptional regulator ICP4 | 123117-123143 | 4:01:01 |                  |
| CCCATTGTTTCCCACGGCCTGGCGCCC                           |        |        |        |                                            |               |         |                  |
| 123188                                                | 123203 | 120764 | 124696 | CDS product transcriptional regulator ICP4 | 123188-123203 | 4:01:01 | GGCGTCCGGGCGGAGG |
| 123248                                                | 123267 | 120764 | 124696 | CDS product transcriptional regulator ICP4 | 123248-123267 | 4:01:01 |                  |
| GGAGGTGCGCCTGGATGCGG                                  |        |        |        |                                            |               |         |                  |
| 123411                                                | 123443 | 120764 | 124696 | CDS product transcriptional regulator ICP4 | 123411-123443 | 5:02:01 |                  |
| CCTGGCAGCCCTGAGTAACCGTTGTGCCTGCC                      |        |        |        |                                            |               |         |                  |
| 123458                                                | 123484 | 120764 | 124696 | CDS product transcriptional regulator ICP4 | 123458-123484 | 5:02:01 |                  |
| GGGCCGGGAAGTGGACCGGCCCGCCGG                           |        |        |        |                                            |               |         |                  |
| 123527                                                | 123552 | 120764 | 124696 | CDS product transcriptional regulator ICP4 | 123527-123552 | 5:02:01 |                  |
| CCCGAGACCTGGCCTTTGCCGGGGCC                            |        |        |        |                                            |               |         |                  |
| 123587                                                | 123616 | 120764 | 124696 | CDS product transcriptional regulator ICP4 | 123587-123616 | 6:03:01 |                  |
| GGCGCCGGTTGCTGGTGTGGACGCGGTGG                         |        |        |        |                                            |               |         |                  |
| 123626                                                | 123641 | 120764 | 124696 | CDS product transcriptional regulator ICP4 | 123626-123641 | 4:01:01 | GGTGGCCCAGGGATGG |
| 123672                                                | 123716 | 120764 | 124696 | CDS product transcriptional regulator ICP4 | 123672-123716 | 7:04:01 |                  |
| CCGGGCCCCGGCGGACCGGACGCCAGGCCGTCGTCCGATGGCC           |        |        |        |                                            |               |         |                  |
| 123674                                                | 123700 | 120764 | 124696 | CDS product transcriptional regulator ICP4 | 123674-123700 | 4:01:01 |                  |
| GGGCCCCGGCGGACCGGACGCCAGG                             |        |        |        |                                            |               |         |                  |
| 123872                                                | 123928 | 120764 | 124696 | CDS product transcriptional regulator ICP4 | 123872-123928 | 8:05:02 |                  |
| CCGTGTGTACCCGCGGGGCCCAAGACCCGCGTCCCCTGTGCCCCGTGAATACC |        |        |        |                                            |               |         |                  |
| 124092                                                | 124127 | 120764 | 124696 | CDS product transcriptional regulator ICP4 | 124092-124127 | 8:05:02 |                  |
| GGGACGGAGACCGGGGGCCGCCGGCCGGAGGCCGG                   |        |        |        |                                            |               |         |                  |

|                                                         |        |        |        |                                            |               |         |                  |
|---------------------------------------------------------|--------|--------|--------|--------------------------------------------|---------------|---------|------------------|
| 124102                                                  | 124125 | 120764 | 124696 | CDS product transcriptional regulator ICP4 | 124102-124125 | 5:02:01 |                  |
| CCGGGGGCCCGCGGGCCGAGGCC                                 |        |        |        |                                            |               |         |                  |
| 124177                                                  | 124196 | 120764 | 124696 | CDS product transcriptional regulator ICP4 | 124177-124196 | 4:01:01 |                  |
| CCCGACCCTGCCGAGAACC                                     |        |        |        |                                            |               |         |                  |
| 124215                                                  | 124231 | 120764 | 124696 | CDS product transcriptional regulator ICP4 | 124215-124231 | 5:02:01 |                  |
| GGCCGGTCGGTCGGTGG                                       |        |        |        |                                            |               |         |                  |
| 124245                                                  | 124260 | 120764 | 124696 | CDS product transcriptional regulator ICP4 | 124245-124260 | 4:01:01 | GGCGGACGAGGCTCGG |
| 124265                                                  | 124281 | 120764 | 124696 | CDS product transcriptional regulator ICP4 | 124265-124281 | 4:01:01 |                  |
| CCCTCCCCCGATTCCC                                        |        |        |        |                                            |               |         |                  |
| 124292                                                  | 124347 | 120764 | 124696 | CDS product transcriptional regulator ICP4 | 124292-124347 | 9:06:02 |                  |
| GGCCGCCCGGTTTTGGGGCCGCGGAGACGGTGTGGAGGGGAGCGACGGAACACGG |        |        |        |                                            |               |         |                  |
| 124357                                                  | 124380 | 120764 | 124696 | CDS product transcriptional regulator ICP4 | 124357-124380 | 5:02:01 |                  |
| GGACACCACGGGGGCTCGGAACGG                                |        |        |        |                                            |               |         |                  |
| 124440                                                  | 124464 | 120764 | 124696 | CDS product transcriptional regulator ICP4 | 124440-124464 | 5:02:01 |                  |
| GGAGCTGGACGATTGGGAGGTGGGG                               |        |        |        |                                            |               |         |                  |
| 124478                                                  | 124521 | 120764 | 124696 | CDS product transcriptional regulator ICP4 | 124478-124521 | 7:04:01 |                  |
| GGGACAGCGAGGAGGGGGCGGGACGAGGGGACGCACCGGGG               |        |        |        |                                            |               |         |                  |
| 124593                                                  | 124606 | 120764 | 124696 | CDS product transcriptional regulator ICP4 | 124593-124606 | 4:01:01 | GGCGGTCAAGGTGG   |
| 124616                                                  | 124632 | 120764 | 124696 | CDS product transcriptional regulator ICP4 | 124616-124632 | 4:01:01 |                  |
| CCTCGTCCTCGTCTCC                                        |        |        |        |                                            |               |         |                  |
| 124652                                                  | 124671 | 120764 | 124696 | CDS product transcriptional regulator ICP4 | 124652-124671 | 5:02:01 |                  |
| GGGGAGGGCGGGGGGAGG                                      |        |        |        |                                            |               |         |                  |



gi|50313241|ref|NC\_001491.2| Equid herpesvirus 1, complete genome

|                                     |      |      |       |                                                  |           |           |         |                              |
|-------------------------------------|------|------|-------|--------------------------------------------------|-----------|-----------|---------|------------------------------|
| 3460                                | 3473 | 2841 | 3614  | CDS product myristylated tegument protein CIRC   |           | 3460-3473 | 4:01:01 | CCCTCCAGCCCGCC               |
| 4057                                | 4073 | 3647 | 4249  | CDS product nuclear protein UL55                 | 4057-4073 | 5:02:01   |         | GGCCGGCTGGGAGGTGG            |
| 4168                                | 4202 | 3647 | 4249  | CDS product nuclear protein UL55                 | 4168-4202 | 6:03:01   |         |                              |
| CCCGCCGTGGTTCCTCCCGTGGGAGCCTATATCCC |      |      |       |                                                  |           |           |         |                              |
| 4499                                | 4522 | 4462 | 5874  | CDS product multifunctional expression regulator |           | 4499-4522 | 4:01:01 |                              |
| GGTAAACCGGAACGAGGGTGTAGG            |      |      |       |                                                  |           |           |         |                              |
| 5096                                | 5122 | 4462 | 5874  | CDS product multifunctional expression regulator |           | 5096-5122 | 5:02:01 |                              |
| CCGATCCGAAGCCGAGCACCGGAGCCC         |      |      |       |                                                  |           |           |         |                              |
| 5389                                | 5405 | 4462 | 5874  | CDS product multifunctional expression regulator |           | 5389-5405 | 4:01:01 |                              |
| CCTGCGCCGCCATGTCC                   |      |      |       |                                                  |           |           |         |                              |
| 5513                                | 5534 | 4462 | 5874  | CDS product multifunctional expression regulator |           | 5513-5534 | 4:01:01 |                              |
| CCGGCTCCGGCTTTTCCCAGCC              |      |      |       |                                                  |           |           |         |                              |
| 5589                                | 5608 | 4462 | 5874  | CDS product multifunctional expression regulator |           | 5589-5608 | 4:01:01 |                              |
| CCCATGGCCAAACGCCGGCC                |      |      |       |                                                  |           |           |         |                              |
| 6171                                | 6190 | 6011 | 7042  | CDS product envelope glycoprotein K              | 6171-6190 | 5:02:01   |         | GGGTGGCGGGAGTCGGGGGG         |
| 6258                                | 6272 | 6011 | 7042  | CDS product envelope glycoprotein K              | 6258-6272 | 4:01:01   |         | CCACCACAAACCCCC              |
| 6973                                | 7000 | 6011 | 7042  | CDS product envelope glycoprotein K              | 6973-7000 | 5:02:01   |         | GGTAAACGCGGCATAGGCGGTGATAAGG |
| 7372                                | 7388 | 7056 | 10301 | CDS product helicase-primase primase subunit     |           | 7372-7388 | 4:01:01 |                              |
| CCACCTCACCGAGTACC                   |      |      |       |                                                  |           |           |         |                              |
| 7566                                | 7578 | 7056 | 10301 | CDS product helicase-primase primase subunit     |           | 7566-7578 | 4:01:01 | GGATGGCGGGGGG                |
| 7870                                | 7891 | 7056 | 10301 | CDS product helicase-primase primase subunit     |           | 7870-7891 | 6:03:01 |                              |
| GGAGGTAAGGGGTGGCACAGG               |      |      |       |                                                  |           |           |         |                              |
| 8814                                | 8848 | 7056 | 10301 | CDS product helicase-primase primase subunit     |           | 8814-8848 | 6:03:01 |                              |

|                                    |       |       |       |                                              |             |         |                              |
|------------------------------------|-------|-------|-------|----------------------------------------------|-------------|---------|------------------------------|
| GGTGGCGTGGAATGGACACTCTGGGGTTTGTGGG |       |       |       |                                              |             |         |                              |
| 8867                               | 8882  | 7056  | 10301 | CDS product helicase-primase primase subunit | 8867-8882   | 4:01:01 | CCAGCCGCGGCCAGCC             |
| 9452                               | 9469  | 7056  | 10301 | CDS product helicase-primase primase subunit | 9452-9469   | 4:01:01 |                              |
| GGGGTTAGGTGCGGCCGG                 |       |       |       |                                              |             |         |                              |
| 9508                               | 9531  | 7056  | 10301 | CDS product helicase-primase primase subunit | 9508-9531   | 4:01:01 |                              |
| GGTCGTAGGTGCCCCGGATCTGG            |       |       |       |                                              |             |         |                              |
| 9689                               | 9711  | 7056  | 10301 | CDS product helicase-primase primase subunit | 9689-9711   | 5:02:01 |                              |
| GGAGGTCAAACCGGAGCGGCCGG            |       |       |       |                                              |             |         |                              |
| 9922                               | 9942  | 7056  | 10301 | CDS product helicase-primase primase subunit | 9922-9942   | 4:01:01 |                              |
| CCAACGCCCGGGCTCCGGTCC              |       |       |       |                                              |             |         |                              |
| 10002                              | 10015 | 7056  | 10301 | CDS product helicase-primase primase subunit | 10002-10015 | 4:01:01 | CCTCCCACCATACC               |
| 10194                              | 10213 | 7056  | 10301 | CDS product helicase-primase primase subunit | 10194-10213 | 4:01:01 |                              |
| CCCTCCGAGCTCTCCTGTCC               |       |       |       |                                              |             |         |                              |
| 10385                              | 10412 | 10300 | 11037 | CDS product tegument protein UL51            | 10385-10412 | 5:02:01 | CCCAGCTACCATGCTCCGCCTACAGTCC |
| 10471                              | 10494 | 10300 | 11037 | CDS product tegument protein UL51            | 10471-10494 | 4:01:01 | CCTCTGCCGACAACACCCGGCGCC     |
| 10576                              | 10598 | 10300 | 11037 | CDS product tegument protein UL51            | 10576-10598 | 4:01:01 | CCGACAACCCGAACCTGAACGCC      |
| 10642                              | 10665 | 10300 | 11037 | CDS product tegument protein UL51            | 10642-10665 | 4:01:01 | CCTGCCTCGCGGCCCTCATGCACC     |
| 10780                              | 10809 | 10300 | 11037 | CDS product tegument protein UL51            | 10780-10809 | 5:02:01 |                              |
| CCCTCGGCCTGGATCCCCAGGCAACCGTCC     |       |       |       |                                              |             |         |                              |
| 10920                              | 10932 | 10300 | 11037 | CDS product tegument protein UL51            | 10920-10932 | 4:01:01 | CCTCTCCTCCCCC                |
| 11141                              | 11164 | 11135 | 12115 | CDS product deoxyuridine triphosphatase      | 11141-11164 | 5:02:01 | CCGGTTGAGCCAAACCTCCATCC      |
| 11251                              | 11272 | 11135 | 12115 | CDS product deoxyuridine triphosphatase      | 11251-11272 | 4:01:01 | GGGGGAGTACGTGGGAAAGGG        |
| 11477                              | 11495 | 11135 | 12115 | CDS product deoxyuridine triphosphatase      | 11477-11495 | 4:01:01 | GGCGTGACGGCGGGGTTGG          |

|                                            |       |       |       |                                                   |                                                |
|--------------------------------------------|-------|-------|-------|---------------------------------------------------|------------------------------------------------|
| 12130                                      | 12171 | 12084 | 12386 | CDS product envelope glycoprotein N               | 12130-12171 8:05:02                            |
| GGTGGTGCTTGGTCTGGCCAGAGGGGCTGGTGGCGACCCAGG |       |       |       |                                                   |                                                |
| 12321                                      | 12340 | 12084 | 12386 | CDS product envelope glycoprotein N               | 12321-12340 4:01:01 CCTGCCAGGCATACCGCGCC       |
| 12885                                      | 12906 | 12549 | 13463 | CDS product tegument protein VP22                 | 12885-12906 5:02:01 CCTCCAATGGCCGCCAAAGCCC     |
| 12947                                      | 12975 | 12549 | 13463 | CDS product tegument protein VP22                 | 12947-12975 6:03:01                            |
| CCACCCCCACGTGTTCCAACGCGACCACC              |       |       |       |                                                   |                                                |
| 13343                                      | 13368 | 12549 | 13463 | CDS product tegument protein VP22                 | 13343-13368 4:01:01 GGGTATGCGGCAGCTGGACCCAACGG |
| 13715                                      | 13739 | 13595 | 14944 | CDS product transactivating tegument protein VP16 | 13715-13739 4:01:01                            |
| CCATCGAGTCCGTTTATTCCATTCC                  |       |       |       |                                                   |                                                |
| 13762                                      | 13785 | 13595 | 14944 | CDS product transactivating tegument protein VP16 | 13762-13785 6:03:01                            |
| CCACCGCCCAAGGCCGCCAGCCCC                   |       |       |       |                                                   |                                                |
| 13802                                      | 13832 | 13595 | 14944 | CDS product transactivating tegument protein VP16 | 13802-13832 5:02:01                            |
| GGCTACAAGGCGAGCTGGGTTTTCCGGAGGG            |       |       |       |                                                   |                                                |
| 13959                                      | 13995 | 13595 | 14944 | CDS product transactivating tegument protein VP16 | 13959-13995 6:03:01                            |
| CCTCGATAGCCTGCCCACTCCCAGCCACTATAGCCCC      |       |       |       |                                                   |                                                |
| 14026                                      | 14047 | 13595 | 14944 | CDS product transactivating tegument protein VP16 | 14026-14047 4:01:01                            |
| CCCTTCCCAGAGGTTCCCGCCC                     |       |       |       |                                                   |                                                |
| 14330                                      | 14350 | 13595 | 14944 | CDS product transactivating tegument protein VP16 | 14330-14350 4:01:01                            |
| CCTGGCGCCTTACGCCAGCC                       |       |       |       |                                                   |                                                |
| 14763                                      | 14775 | 13595 | 14944 | CDS product transactivating tegument protein VP16 | 14763-14775 4:01:01                            |
| CCCGCCCTCCCCC                              |       |       |       |                                                   |                                                |
| 14788                                      | 14814 | 13595 | 14944 | CDS product transactivating tegument protein VP16 | 14788-14814 5:02:01                            |
| CCAGGCGACCCAGTCCCGCCTCTTACC                |       |       |       |                                                   |                                                |

|                                 |       |       |       |     |         |          |         |         |
|---------------------------------|-------|-------|-------|-----|---------|----------|---------|---------|
| 15594                           | 15620 | 15317 | 17932 | CDS | product | tegument | protein | VP13/14 |
| CCCCGCACAGCCACAAGCACCCAGACC     |       |       |       |     |         |          |         |         |
| 15666                           | 15683 | 15317 | 17932 | CDS | product | tegument | protein | VP13/14 |
| 15802                           | 15819 | 15317 | 17932 | CDS | product | tegument | protein | VP13/14 |
| 15838                           | 15860 | 15317 | 17932 | CDS | product | tegument | protein | VP13/14 |
| 16182                           | 16198 | 15317 | 17932 | CDS | product | tegument | protein | VP13/14 |
| 16289                           | 16304 | 15317 | 17932 | CDS | product | tegument | protein | VP13/14 |
| 16356                           | 16373 | 15317 | 17932 | CDS | product | tegument | protein | VP13/14 |
| 16775                           | 16798 | 15317 | 17932 | CDS | product | tegument | protein | VP13/14 |
| 17097                           | 17110 | 15317 | 17932 | CDS | product | tegument | protein | VP13/14 |
| 17440                           | 17459 | 15317 | 17932 | CDS | product | tegument | protein | VP13/14 |
| 17460                           | 17488 | 15317 | 17932 | CDS | product | tegument | protein | VP13/14 |
| CCTAATCCTTCAGCGCCTGGCGGGCCACC   |       |       |       |     |         |          |         |         |
| 17674                           | 17690 | 15317 | 17932 | CDS | product | tegument | protein | VP13/14 |
| 17776                           | 17806 | 15317 | 17932 | CDS | product | tegument | protein | VP13/14 |
| GGCGCCGGCCTGGGACGCATGGTGGACATGG |       |       |       |     |         |          |         |         |
| 17852                           | 17862 | 15317 | 17932 | CDS | product | tegument | protein | VP13/14 |
| 18084                           | 18096 | 18083 | 20326 | CDS | product | tegument | protein | VP11/12 |
| 18156                           | 18171 | 18083 | 20326 | CDS | product | tegument | protein | VP11/12 |
| 18478                           | 18493 | 18083 | 20326 | CDS | product | tegument | protein | VP11/12 |
| 18920                           | 18933 | 18083 | 20326 | CDS | product | tegument | protein | VP11/12 |
| 19097                           | 19114 | 18083 | 20326 | CDS | product | tegument | protein | VP11/12 |
| 19399                           | 19428 | 18083 | 20326 | CDS | product | tegument | protein | VP11/12 |

|             |         |                         |
|-------------|---------|-------------------------|
| 15594-15620 | 4:01:01 |                         |
| 15666-15683 | 4:01:01 | GGAAGAGGAGGAAGAGGG      |
| 15802-15819 | 4:01:01 | CCCACGTCCGCCGAATCC      |
| 15838-15860 | 5:02:01 | GGTGAAATGGTGGCCGGTGCGGG |
| 16182-16198 | 4:01:01 | GGGGGACTACATGGAGG       |
| 16289-16304 | 4:01:01 | CCAACCACACCAACCC        |
| 16356-16373 | 4:01:01 | CCTGGCCCGCACACCC        |
| 16775-16798 | 4:01:01 | GGGAGAGGCGCAGGAAACTGGGG |
| 17097-17110 | 4:01:01 | GGTGGCAATGGAGG          |
| 17440-17459 | 4:01:01 | GGGGTGTTTTTGGGGGTGGG    |
| 17460-17488 | 5:02:01 |                         |
| 17674-17690 | 4:01:01 | CCTCGCCCCGGCCCTCC       |
| 17776-17806 | 6:03:01 |                         |
| 17852-17862 | 4:01:01 | CCACCTCCTCC             |
| 18084-18096 | 4:01:01 | GGACGGAGGGGGG           |
| 18156-18171 | 4:01:01 | CCTGCTGCCAACCC          |
| 18478-18493 | 4:01:01 | GGTGCGGTGGGTACAGG       |
| 18920-18933 | 4:01:01 | CCACCGCCGACCC           |
| 19097-19114 | 4:01:01 | GGCTCGATGGTGGCGTGG      |
| 19399-19428 | 6:03:01 |                         |

CCTCCCCAAGGGCCGCTACCGGCACCCCC

|                   |       |       |       |                                                 |
|-------------------|-------|-------|-------|-------------------------------------------------|
| 19495             | 19508 | 18083 | 20326 | CDS product tegument protein VP11/12            |
| 19523             | 19538 | 18083 | 20326 | CDS product tegument protein VP11/12            |
| 19722             | 19743 | 18083 | 20326 | CDS product tegument protein VP11/12            |
| 19760             | 19779 | 18083 | 20326 | CDS product tegument protein VP11/12            |
| 19800             | 19817 | 18083 | 20326 | CDS product tegument protein VP11/12            |
| 19875             | 19890 | 18083 | 20326 | CDS product tegument protein VP11/12            |
| 19926             | 19948 | 18083 | 20326 | CDS product tegument protein VP11/12            |
| 19978             | 19992 | 18083 | 20326 | CDS product tegument protein VP11/12            |
| 20002             | 20018 | 18083 | 20326 | CDS product tegument protein VP11/12            |
| 20178             | 20195 | 18083 | 20326 | CDS product tegument protein VP11/12            |
| 21518             | 21539 | 21445 | 22851 | CDS product envelope glycoprotein C             |
| 21760             | 21777 | 21445 | 22851 | CDS product envelope glycoprotein C             |
| 21971             | 21987 | 21445 | 22851 | CDS product envelope glycoprotein C             |
| 22163             | 22182 | 21445 | 22851 | CDS product envelope glycoprotein C             |
| 22273             | 22285 | 21445 | 22851 | CDS product envelope glycoprotein C             |
| 22620             | 22645 | 21445 | 22851 | CDS product envelope glycoprotein C             |
| 23153             | 23168 | 23029 | 24234 | CDS product envelope protein UL43               |
| 23243             | 23263 | 23029 | 24234 | CDS product envelope protein UL43               |
| 24114             | 24134 | 23029 | 24234 | CDS product envelope protein UL43               |
| 24678             | 24694 | 24479 | 25696 | CDS product DNA polymerase processivity subunit |
| GGCACGGCTGGGTCGGG |       |       |       |                                                 |
| 25396             | 25406 | 24479 | 25696 | CDS product DNA polymerase processivity subunit |

|             |         |                            |
|-------------|---------|----------------------------|
| 19495-19508 | 4:01:01 | CCAACCTCCCCTCC             |
| 19523-19538 | 4:01:01 | CCCCAGGACCAACCC            |
| 19722-19743 | 4:01:01 | CCCCTCAACGCCATCGCCAACC     |
| 19760-19779 | 4:01:01 | CCAATCCACTCCTTGGGCC        |
| 19800-19817 | 4:01:01 | CCCCAACCCGTTGATCC          |
| 19875-19890 | 4:01:01 | GGTCGAGGAGGTTTGG           |
| 19926-19948 | 4:01:01 | CCCCAGCCGTGCCGGGCGTTCCC    |
| 19978-19992 | 4:01:01 | CCATCGTCCCCCGCC            |
| 20002-20018 | 4:01:01 | CCACCCGCCAATTCTCC          |
| 20178-20195 | 4:01:01 | CCCCGGCCCCACCAACC          |
| 21518-21539 | 4:01:01 | CCAGCGCCAGTGCCGCGCCCC      |
| 21760-21777 | 4:01:01 | GGAACCCCTGGTAGGTGG         |
| 21971-21987 | 4:01:01 | CCTCCTCCGGATCAACC          |
| 22163-22182 | 4:01:01 | GGCTCGGGTGAACGGAAAGG       |
| 22273-22285 | 4:01:01 | CCGGCCGTCCGCC              |
| 22620-22645 | 4:01:01 | GGTGCAGGTGATTGTGGTTTCATGGG |
| 23153-23168 | 4:01:01 | CCCCAGTATACCCCC            |
| 23243-23263 | 4:01:01 | GGGCCGTGGAGTGATGCCGG       |
| 24114-24134 | 4:01:01 | GGAGGCCGCCAGGTACATGG       |
| 24678-24694 | 4:01:01 |                            |
| 25396-25406 | 4:01:01 | GGCGGGGGGGG                |

|                                 |       |       |       |                                                |                     |
|---------------------------------|-------|-------|-------|------------------------------------------------|---------------------|
| 26778                           | 26795 | 26262 | 27755 | CDS product tegument host shutoff protein      | 26778-26795 4:01:01 |
| 26966                           | 26987 | 26262 | 27755 | CDS product tegument host shutoff protein      | 26966-26987 5:02:01 |
| CCGCTGTTCCGCCAACCTCC            |       |       |       |                                                |                     |
| 27357                           | 27384 | 26262 | 27755 | CDS product tegument host shutoff protein      | 27357-27384 6:03:01 |
| GGCCTCGGCGGTCTGCGGAGGCCTCAGG    |       |       |       |                                                |                     |
| 27464                           | 27479 | 26262 | 27755 | CDS product tegument host shutoff protein      | 27464-27479 4:01:01 |
| 27565                           | 27585 | 26262 | 27755 | CDS product tegument host shutoff protein      | 27565-27585 4:01:01 |
| CCTACCCATCACCCAGGAGCC           |       |       |       |                                                |                     |
| 27974                           | 28005 | 27894 | 28859 | CDS product ribonucleotide reductase subunit 2 | 27974-28005 6:03:01 |
| GGCGAGAGGAAAGCTCGGGATGGTTGGGGG  |       |       |       |                                                |                     |
| 28291                           | 28311 | 27894 | 28859 | CDS product ribonucleotide reductase subunit 2 | 28291-28311 4:01:01 |
| GGTTGTGGGTACGGAGATAGG           |       |       |       |                                                |                     |
| 28399                           | 28429 | 27894 | 28859 | CDS product ribonucleotide reductase subunit 2 | 28399-28429 6:03:01 |
| CCTTTGCCTGTAGCCAGGCAACCTTCCGTCC |       |       |       |                                                |                     |
| 28702                           | 28725 | 27894 | 28859 | CDS product ribonucleotide reductase subunit 2 | 28702-28725 5:02:01 |
| GGTCATCGGAAATGGGAAGGTCGG        |       |       |       |                                                |                     |
| 30538                           | 30559 | 28904 | 31276 | CDS product ribonucleotide reductase subunit 1 | 30538-30559 4:01:01 |
| CCCGGCCTCTTCCATTAGAGCC          |       |       |       |                                                |                     |
| 30669                           | 30685 | 28904 | 31276 | CDS product ribonucleotide reductase subunit 1 | 30669-30685 4:01:01 |
| CCTGTCCGGCCAGCGCC               |       |       |       |                                                |                     |
| 30712                           | 30733 | 28904 | 31276 | CDS product ribonucleotide reductase subunit 1 | 30712-30733 4:01:01 |
| CCAGCCTACTTCCCCGCTGACC          |       |       |       |                                                |                     |
| 30744                           | 30760 | 28904 | 31276 | CDS product ribonucleotide reductase subunit 1 | 30744-30760 4:01:01 |

|                                           |       |       |       |                                                |                                                |
|-------------------------------------------|-------|-------|-------|------------------------------------------------|------------------------------------------------|
| CCATAGCCGGTTCCTCC                         |       |       |       |                                                |                                                |
| 31151                                     | 31169 | 28904 | 31276 | CDS product ribonucleotide reductase subunit 1 | 31151-31169 4:01:01                            |
| GGGCGGGGAGGCAGCGTGG                       |       |       |       |                                                |                                                |
| 31535                                     | 31555 | 31519 | 32916 | CDS product capsid triplex subunit 1           | 31535-31555 4:01:01 CCCAATCCTGTGGGTCCCACC      |
| 31610                                     | 31650 | 31519 | 32916 | CDS product capsid triplex subunit 1           | 31610-31650 7:04:01                            |
| GGCGTGTGGTTCTGGGGGAGTCTGAGGCTATGGCCCCCAGG |       |       |       |                                                |                                                |
| 31796                                     | 31829 | 31519 | 32916 | CDS product capsid triplex subunit 1           | 31796-31829 7:04:01                            |
| GGAGCGGGAGGGCGGCGTTTGGGTGCGGCTCTGG        |       |       |       |                                                |                                                |
| 31835                                     | 31850 | 31519 | 32916 | CDS product capsid triplex subunit 1           | 31835-31850 4:01:01 CCGCTCCCTCCGTTC            |
| 31931                                     | 31966 | 31519 | 32916 | CDS product capsid triplex subunit 1           | 31931-31966 6:03:01                            |
| CCGCCACGTACACCCTCACTCCCTCCCGCGTAACC       |       |       |       |                                                |                                                |
| 32432                                     | 32451 | 31519 | 32916 | CDS product capsid triplex subunit 1           | 32432-32451 4:01:01 CCCAAGCCTCGTCCAACCTC       |
| 32496                                     | 32537 | 31519 | 32916 | CDS product capsid triplex subunit 1           | 32496-32537 9:06:02                            |
| GGCATCGAGGTGGTGGCGGAGCGGATTATCGGAAGTCCGGG |       |       |       |                                                |                                                |
| 32709                                     | 32721 | 31519 | 32916 | CDS product capsid triplex subunit 1           | 32709-32721 4:01:01 GGGGGTGGCCTGG              |
| 33583                                     | 33609 | 33292 | 36354 | CDS product tegument protein UL37              | 33583-33609 7:04:01 GGACGGACAGGGAATGGAGGCGGTGG |
| 33933                                     | 33957 | 33292 | 36354 | CDS product tegument protein UL37              | 33933-33957 4:01:01 GGCCTAATGGTCAAGGGCTACAAGG  |
| 34012                                     | 34037 | 33292 | 36354 | CDS product tegument protein UL37              | 34012-34037 4:01:01 CCTATTTTCCCAAAGGAACCGCGACC |
| 34366                                     | 34403 | 33292 | 36354 | CDS product tegument protein UL37              | 34366-34403 6:03:01                            |
| CCGAGCACGCCAGTAACACCTGGGAGACCATCCAGGCC    |       |       |       |                                                |                                                |
| 34467                                     | 34491 | 33292 | 36354 | CDS product tegument protein UL37              | 34467-34491 5:02:01 GGAATTTTGGAGCGCGTGGTGGTGG  |
| 34706                                     | 34728 | 33292 | 36354 | CDS product tegument protein UL37              | 34706-34728 5:02:01 GGGTCTGGCGGACAAGGGAGTGG    |
| 34831                                     | 34856 | 33292 | 36354 | CDS product tegument protein UL37              | 34831-34856 4:01:01 CCACTGGGCCCCGAACCCATAGCGCC |



|                                     |       |       |       |                                    |             |         |                              |
|-------------------------------------|-------|-------|-------|------------------------------------|-------------|---------|------------------------------|
| 35170                               | 35191 | 33292 | 36354 | CDS product tegument protein UL37  | 35170-35191 | 4:01:01 | GGGCCAGGGACTACGGCGCCGG       |
| 35272                               | 35304 | 33292 | 36354 | CDS product tegument protein UL37  | 35272-35304 | 6:03:01 |                              |
| CCCCTACCCCAACCATGGCCCATGCCAACAACC   |       |       |       |                                    |             |         |                              |
| 35379                               | 35408 | 33292 | 36354 | CDS product tegument protein UL37  | 35379-35408 | 5:02:01 |                              |
| CCAGTGCCCGAACGACCCTCCGTAAAAACC      |       |       |       |                                    |             |         |                              |
| 35846                               | 35881 | 33292 | 36354 | CDS product tegument protein UL37  | 35846-35881 | 7:04:01 |                              |
| GGCCAGGGCCCAGAGGGGTTGGCAATAAGGGCCGG |       |       |       |                                    |             |         |                              |
| 35892                               | 35911 | 33292 | 36354 | CDS product tegument protein UL37  | 35892-35911 | 4:01:01 | GGGGTTCTGAGGCTCCCGG          |
| 36607                               | 36641 | 36588 | 46853 | CDS product large tegument protein | 36607-36641 | 6:03:01 |                              |
| GGCGAATAAGCGGGGGCGCTCAGGCCGATGTGG   |       |       |       |                                    |             |         |                              |
| 36797                               | 36819 | 36588 | 46853 | CDS product large tegument protein | 36797-36819 | 5:02:01 | GGGCGGCCTGGACTGTGGCCGG       |
| 37049                               | 37067 | 36588 | 46853 | CDS product large tegument protein | 37049-37067 | 4:01:01 | GGGGCTATTGGTCTGGCGG          |
| 37393                               | 37420 | 36588 | 46853 | CDS product large tegument protein | 37393-37420 | 6:03:01 | GGCTGTGGGTGCGTTTCGGAGGCGTGG  |
| 37462                               | 37478 | 36588 | 46853 | CDS product large tegument protein | 37462-37478 | 4:01:01 | GGACATGGAGGGTGTGG            |
| 37559                               | 37579 | 36588 | 46853 | CDS product large tegument protein | 37559-37579 | 5:02:01 | CCCCCGTGGACGCCTCCCACC        |
| 37857                               | 37871 | 36588 | 46853 | CDS product large tegument protein | 37857-37871 | 4:01:01 | GGCTCTCGGGGGAGG              |
| 38077                               | 38095 | 36588 | 46853 | CDS product large tegument protein | 38077-38095 | 4:01:01 | GGTGAAAATGGCGCGCGG           |
| 38449                               | 38472 | 36588 | 46853 | CDS product large tegument protein | 38449-38472 | 4:01:01 | CCTATTTGCCCAGAACCGAAACC      |
| 38689                               | 38716 | 36588 | 46853 | CDS product large tegument protein | 38689-38716 | 5:02:01 | CCTATCAGCCGTCCCTACCCGCGTAGCC |
| 38917                               | 38937 | 36588 | 46853 | CDS product large tegument protein | 38917-38937 | 4:01:01 | GGCCTCGGCGGTATCCAGGG         |
| 38932                               | 38946 | 36588 | 46853 | CDS product large tegument protein | 38932-38946 | 4:01:01 | CCAGGGACCTCCGGC              |
| 39641                               | 39665 | 36588 | 46853 | CDS product large tegument protein | 39641-39665 | 6:03:01 | CCAAACTCCACCACCTCATCCGCC     |
| 40042                               | 40055 | 36588 | 46853 | CDS product large tegument protein | 40042-40055 | 4:01:01 | GGGGTTCAGGAGG                |

|                                                               |       |       |       |                                    |             |          |                         |
|---------------------------------------------------------------|-------|-------|-------|------------------------------------|-------------|----------|-------------------------|
| 40068                                                         | 40084 | 36588 | 46853 | CDS product large tegument protein | 40068-40084 | 4:01:01  | CCGCGATAGCCGCCGCC       |
| 40110                                                         | 40126 | 36588 | 46853 | CDS product large tegument protein | 40110-40126 | 5:02:01  | CCGCCGCCACTGCCGCC       |
| 40131                                                         | 40148 | 36588 | 46853 | CDS product large tegument protein | 40131-40148 | 4:01:01  | GGGAGCTGGCGAGGCTGG      |
| 40438                                                         | 40454 | 36588 | 46853 | CDS product large tegument protein | 40438-40454 | 4:01:01  | GGAACAGGCCCTGGCGG       |
| 41344                                                         | 41365 | 36588 | 46853 | CDS product large tegument protein | 41344-41365 | 4:01:01  | GGATATTAAGGCCGTGGAGTGG  |
| 41526                                                         | 41542 | 36588 | 46853 | CDS product large tegument protein | 41526-41542 | 4:01:01  | GGGACGAGGCATGGGGG       |
| 41983                                                         | 42001 | 36588 | 46853 | CDS product large tegument protein | 41983-42001 | 4:01:01  | CCGCCCTCACCTGGAAGCC     |
| 42321                                                         | 42338 | 36588 | 46853 | CDS product large tegument protein | 42321-42338 | 4:01:01  | GGTTTGGGCTGAAAAGG       |
| 42908                                                         | 42929 | 36588 | 46853 | CDS product large tegument protein | 42908-42929 | 5:02:01  | GGCGAAAGCGGACGGCGCGCGG  |
| 42942                                                         | 42979 | 36588 | 46853 | CDS product large tegument protein | 42942-42979 | 9:06:02  |                         |
| CCTCCGCCATTCCCGGAAACCCCTGGCCACCTTTACC                         |       |       |       |                                    |             |          |                         |
| 43368                                                         | 43388 | 36588 | 46853 | CDS product large tegument protein | 43368-43388 | 4:01:01  | CCAGACCCGGGGCGACCGACC   |
| 43688                                                         | 43710 | 36588 | 46853 | CDS product large tegument protein | 43688-43710 | 4:01:01  | CCTCCAATGAACCCGGATGACCC |
| 43966                                                         | 44000 | 36588 | 46853 | CDS product large tegument protein | 43966-44000 | 7:04:01  |                         |
| GGCGTGGCAAGAGTGGTTGGAGGATGGGTTCGCGG                           |       |       |       |                                    |             |          |                         |
| 44022                                                         | 44044 | 36588 | 46853 | CDS product large tegument protein | 44022-44044 | 5:02:01  | CCAACGCCATGCCGGCGCCTCCC |
| 44145                                                         | 44167 | 36588 | 46853 | CDS product large tegument protein | 44145-44167 | 4:01:01  | CCGCCATCATGTCCGAAAGCCC  |
| 44199                                                         | 44260 | 36588 | 46853 | CDS product large tegument protein | 44199-44260 | 13:10:03 |                         |
| CCGTTCCACCTTCCGTACCTGCTCCTCCCACTCTTCCACCCGCTCCCCCTCTGCCCAATCC |       |       |       |                                    |             |          |                         |
| 44543                                                         | 44581 | 36588 | 46853 | CDS product large tegument protein | 44543-44581 | 8:05:02  |                         |
| CCAGTTCCACCCACCGATAAGCCGTCAACCACCACTCCC                       |       |       |       |                                    |             |          |                         |
| 44741                                                         | 44760 | 36588 | 46853 | CDS product large tegument protein | 44741-44760 | 5:02:01  | CCCGGAGCCAAACCACCCCC    |
| 44934                                                         | 44992 | 36588 | 46853 | CDS product large tegument protein | 44934-44992 | 11:08:02 |                         |

|                                                                            |       |       |       |                                             |                      |                           |
|----------------------------------------------------------------------------|-------|-------|-------|---------------------------------------------|----------------------|---------------------------|
| CCCAATCAACCAAGGACCCCTGCCGTAGAGACCCCGCGGCCCGGCC                             |       |       |       |                                             |                      |                           |
| 45138                                                                      | 45164 | 36588 | 46853 | CDS product large tegument protein          | 45138-45164 6:03:01  | CCCCGCCGCGGCCCGGCCAAAGACC |
| 45187                                                                      | 45271 | 36588 | 46853 | CDS product large tegument protein          | 45187-45271 15:12:03 |                           |
| CCCAAAGCCGCGCAAGGACCAGGCCAAGGACCAGGCCAAGGACCAGGCCAAGGACCAGGCCAAGGACCAGGCC  |       |       |       |                                             |                      |                           |
| 45196                                                                      | 45269 | 36588 | 46853 | CDS product large tegument protein          | 45196-45269 13:10:03 |                           |
| GGCCAAGGACCAGGCCAAGGACCAGGCCAAGGACCAGGCCAAGGACCAGGCCAAGGACCAGGCCAAGGACCAGG |       |       |       |                                             |                      |                           |
| 45565                                                                      | 45595 | 36588 | 46853 | CDS product large tegument protein          | 45565-45595 5:02:01  |                           |
| CCCATTGCCCGATTCTCCACCGACGACCCC                                             |       |       |       |                                             |                      |                           |
| 45935                                                                      | 45948 | 36588 | 46853 | CDS product large tegument protein          | 45935-45948 4:01:01  | CCGACCGCCATTCC            |
| 46097                                                                      | 46149 | 36588 | 46853 | CDS product large tegument protein          | 46097-46149 11:08:02 |                           |
| CCTCAGCCGCCACCGCAAACCAGACGCCACCGCCTCAAGAACCCCCAGCACC                       |       |       |       |                                             |                      |                           |
| 47519                                                                      | 47538 | 47403 | 48230 | CDS product nuclear egress membrane protein | 47519-47538 4:01:01  | GGAGATGCTGGCGAGGCTGG      |
| 47921                                                                      | 47935 | 47403 | 48230 | CDS product nuclear egress membrane protein | 47921-47935 4:01:01  | GGGGGCGTTGGGGG            |
| 48098                                                                      | 48115 | 47403 | 48230 | CDS product nuclear egress membrane protein | 48098-48115 4:01:01  | GGCTGGTAGGTGTTGGG         |
| 48819                                                                      | 48835 | 48763 | 50625 | CDS product DNA packaging protein UL32      | 48819-48835 4:01:01  | GGAGGCTGGCAGCCGG          |
| 49341                                                                      | 49369 | 48763 | 50625 | CDS product DNA packaging protein UL32      | 49341-49369 4:01:01  |                           |
| CCCCGCTGCGCCGCTCCGGGACGGCCCC                                               |       |       |       |                                             |                      |                           |
| 49359                                                                      | 49404 | 48763 | 50625 | CDS product DNA packaging protein UL32      | 49359-49404 10:07:02 |                           |
| GGGACGGCCCCGCGGCAACGGCCATGGCCGGCCTCGGTATGGCGG                              |       |       |       |                                             |                      |                           |
| 49521                                                                      | 49570 | 48763 | 50625 | CDS product DNA packaging protein UL32      | 49521-49570 11:08:02 |                           |
| GGCAGACATGGAGCGGCAGGCCGGCGGATGGGGCGGTGGGGTGTTTGG                           |       |       |       |                                             |                      |                           |
| 49888                                                                      | 49911 | 48763 | 50625 | CDS product DNA packaging protein UL32      | 49888-49911 4:01:01  | GGGCCTGCGTGGAGGAGTATTGG   |
| 49985                                                                      | 50004 | 48763 | 50625 | CDS product DNA packaging protein UL32      | 49985-50004 4:01:01  | GGACACGGCCACGGGGCCGG      |

|                                           |       |       |       |                                              |                                            |
|-------------------------------------------|-------|-------|-------|----------------------------------------------|--------------------------------------------|
| 50217                                     | 50243 | 48763 | 50625 | CDS product DNA packaging protein UL32       | 50217-50243 6:03:01                        |
| GGCGACTGCGGCGTGGGTGGCGGCGGG               |       |       |       |                                              |                                            |
| 50379                                     | 50401 | 48763 | 50625 | CDS product DNA packaging protein UL32       | 50379-50401 5:02:01 CCCATAGGCCCCCTCCAGAACC |
| 51009                                     | 51043 | 50618 | 51598 | CDS product nuclear egress lamina protein    | 51009-51043 7:04:01                        |
| CCCAACCTGCACCGTTTCCGGCGAGCCTCGCCTCC       |       |       |       |                                              |                                            |
| 51140                                     | 51171 | 50618 | 51598 | CDS product nuclear egress lamina protein    | 51140-51171 6:03:01                        |
| CCGCCCAGGGGGACCAGGCCGGCGTTGCCGCC          |       |       |       |                                              |                                            |
| 51147                                     | 51161 | 50618 | 51598 | CDS product nuclear egress lamina protein    | 51147-51161 4:01:01 GGGGGACCAGGCCGG        |
| 51372                                     | 51389 | 50618 | 51598 | CDS product nuclear egress lamina protein    | 51372-51389 4:01:01 CCTACTGGCCGCCTGCCC     |
| 51800                                     | 51831 | 51522 | 55184 | CDS product DNA polymerase catalytic subunit | 51800-51831 6:03:01                        |
| GAAACATAGGTCGGGTCTTCGGCGAGGTCGG           |       |       |       |                                              |                                            |
| 51852                                     | 51894 | 51522 | 55184 | CDS product DNA polymerase catalytic subunit | 51852-51894 8:05:02                        |
| GGTTGGGGCGTGCGGTCTTGTTACCACGGGGTTTTGGGCGG |       |       |       |                                              |                                            |
| 52022                                     | 52037 | 51522 | 55184 | CDS product DNA polymerase catalytic subunit | 52022-52037 4:01:01 GGTGAGGTGCGGCAGG       |
| 52213                                     | 52238 | 51522 | 55184 | CDS product DNA polymerase catalytic subunit | 52213-52238 5:02:01                        |
| CCTCTGCTGCCGCCGTGGCCACATCC                |       |       |       |                                              |                                            |
| 52462                                     | 52481 | 51522 | 55184 | CDS product DNA polymerase catalytic subunit | 52462-52481 5:02:01                        |
| CCCCCAGCTCCGATACCCCC                      |       |       |       |                                              |                                            |
| 52544                                     | 52565 | 51522 | 55184 | CDS product DNA polymerase catalytic subunit | 52544-52565 4:01:01                        |
| GGAGTAAGGCTTGTGGTTTCGG                    |       |       |       |                                              |                                            |
| 52704                                     | 52733 | 51522 | 55184 | CDS product DNA polymerase catalytic subunit | 52704-52733 6:03:01                        |
| CCGTTTGCCACCCCGTGAATCCGTAAACC             |       |       |       |                                              |                                            |
| 52790                                     | 52805 | 51522 | 55184 | CDS product DNA polymerase catalytic subunit | 52790-52805 4:01:01 GGGGGTGCTGGTGGGG       |

|                                                     |       |       |       |                                              |             |                         |
|-----------------------------------------------------|-------|-------|-------|----------------------------------------------|-------------|-------------------------|
| 53080                                               | 53131 | 51522 | 55184 | CDS product DNA polymerase catalytic subunit | 53080-53131 | 9:06:02                 |
| CCTTTGCTCCCTGGTAGCCACGGCCCTCCCGACGCCGGGCTTCCCGCCTCC |       |       |       |                                              |             |                         |
| 53164                                               | 53182 | 51522 | 55184 | CDS product DNA polymerase catalytic subunit | 53164-53182 | 4:01:01                 |
| CCGGGGTACCGTCCACACC                                 |       |       |       |                                              |             |                         |
| 53395                                               | 53411 | 51522 | 55184 | CDS product DNA polymerase catalytic subunit | 53395-53411 | 4:01:01                 |
| CCACCGCCGATAGTTCC                                   |       |       |       |                                              |             |                         |
| 53442                                               | 53459 | 51522 | 55184 | CDS product DNA polymerase catalytic subunit | 53442-53459 | 4:01:01                 |
| CCCACCAGCCTAGAGTCC                                  |       |       |       |                                              |             |                         |
| 53475                                               | 53504 | 51522 | 55184 | CDS product DNA polymerase catalytic subunit | 53475-53504 | 5:02:01                 |
| CCTATTACGCCCTCCGGTCAGGCCCTCCC                       |       |       |       |                                              |             |                         |
| 54014                                               | 54041 | 51522 | 55184 | CDS product DNA polymerase catalytic subunit | 54014-54041 | 4:01:01                 |
| GGAGATCTGGATGACCAGGTCCTCTTGG                        |       |       |       |                                              |             |                         |
| 54138                                               | 54160 | 51522 | 55184 | CDS product DNA polymerase catalytic subunit | 54138-54160 | 4:01:01                 |
| GGTATCGGCTCCAGGTTATCGGG                             |       |       |       |                                              |             |                         |
| 54232                                               | 54251 | 51522 | 55184 | CDS product DNA polymerase catalytic subunit | 54232-54251 | 4:01:01                 |
| GGGTGCCGGGTCGCAGGCGG                                |       |       |       |                                              |             |                         |
| 54367                                               | 54381 | 51522 | 55184 | CDS product DNA polymerase catalytic subunit | 54367-54381 | 4:01:01 GGCGGCTGCTGGAGG |
| 54480                                               | 54508 | 51522 | 55184 | CDS product DNA polymerase catalytic subunit | 54480-54508 | 8:05:02                 |
| CCGCCCCACCATCCCCCGCGCTGCCGCC                        |       |       |       |                                              |             |                         |
| 54519                                               | 54542 | 51522 | 55184 | CDS product DNA polymerase catalytic subunit | 54519-54542 | 5:02:01                 |
| CCGCCGTTGCCATTTCCAGGGCC                             |       |       |       |                                              |             |                         |
| 54622                                               | 54638 | 51522 | 55184 | CDS product DNA polymerase catalytic subunit | 54622-54638 | 5:02:01                 |
| CCACCTCCGCCTTTGCC                                   |       |       |       |                                              |             |                         |

|                                                             |       |       |       |                                                 |                                     |
|-------------------------------------------------------------|-------|-------|-------|-------------------------------------------------|-------------------------------------|
| 54831                                                       | 54889 | 51522 | 55184 | CDS product DNA polymerase catalytic subunit    | 54831-54889 10:07:02                |
| CCATCGCCCCGAAAATCCTGGCCGTTCCAAACCCGAATCCTGCGAGGCCAGCAACCTCC |       |       |       |                                                 |                                     |
| 54979                                                       | 54990 | 51522 | 55184 | CDS product DNA polymerase catalytic subunit    | 54979-54990 4:01:01 GGTCGGCGGGG     |
| 55665                                                       | 55682 | 55453 | 59082 | CDS product single-stranded DNA-binding protein | 55665-55682 4:01:01                 |
| GGACTGGGTGGTACTGGG                                          |       |       |       |                                                 |                                     |
| 55737                                                       | 55753 | 55453 | 59082 | CDS product single-stranded DNA-binding protein | 55737-55753 4:01:01                 |
| GGAGGCTCGGTCATCGG                                           |       |       |       |                                                 |                                     |
| 55768                                                       | 55782 | 55453 | 59082 | CDS product single-stranded DNA-binding protein | 55768-55782 4:01:01 CCCCCAACCTCACCC |
| 55889                                                       | 55907 | 55453 | 59082 | CDS product single-stranded DNA-binding protein | 55889-55907 4:01:01                 |
| CCTGTCTCCGAGACCACC                                          |       |       |       |                                                 |                                     |
| 56177                                                       | 56193 | 55453 | 59082 | CDS product single-stranded DNA-binding protein | 56177-56193 4:01:01                 |
| GGGTCCGGCGGCTGTGG                                           |       |       |       |                                                 |                                     |
| 56229                                                       | 56250 | 55453 | 59082 | CDS product single-stranded DNA-binding protein | 56229-56250 4:01:01                 |
| GGAGCGGCCACCTGGCCTTG                                        |       |       |       |                                                 |                                     |
| 56315                                                       | 56338 | 55453 | 59082 | CDS product single-stranded DNA-binding protein | 56315-56338 4:01:01                 |
| GGGAAACGCCGCAAGGGTTCGGG                                     |       |       |       |                                                 |                                     |
| 56571                                                       | 56589 | 55453 | 59082 | CDS product single-stranded DNA-binding protein | 56571-56589 4:01:01                 |
| GGACTGGTAGGAGCCATGG                                         |       |       |       |                                                 |                                     |
| 56634                                                       | 56659 | 55453 | 59082 | CDS product single-stranded DNA-binding protein | 56634-56659 6:03:01                 |
| GGGGCCCCGGCAGACGGAAGGATGG                                   |       |       |       |                                                 |                                     |
| 56667                                                       | 56702 | 55453 | 59082 | CDS product single-stranded DNA-binding protein | 56667-56702 8:05:02                 |
| CCTTCCTACCACGCTTCTACCTAATAGCCGCCCC                          |       |       |       |                                                 |                                     |
| 57262                                                       | 57284 | 55453 | 59082 | CDS product single-stranded DNA-binding protein | 57262-57284 5:02:01                 |

|                                            |       |       |       |                                                 |                                      |
|--------------------------------------------|-------|-------|-------|-------------------------------------------------|--------------------------------------|
| CCAGCCCCTGCTCAGCCCCACC                     |       |       |       |                                                 |                                      |
| 57708                                      | 57728 | 55453 | 59082 | CDS product single-stranded DNA-binding protein | 57708-57728 5:02:01                  |
| CCCGCCTCTGAGCCGCCACC                       |       |       |       |                                                 |                                      |
| 57838                                      | 57869 | 55453 | 59082 | CDS product single-stranded DNA-binding protein | 57838-57869 5:02:01                  |
| CCAGAGCCAGGGTGGCCGGCATGGCCAGCGCC           |       |       |       |                                                 |                                      |
| 57847                                      | 57861 | 55453 | 59082 | CDS product single-stranded DNA-binding protein | 57847-57861 4:01:01 GGTGGCCGGCATGG   |
| 57944                                      | 57968 | 55453 | 59082 | CDS product single-stranded DNA-binding protein | 57944-57968 4:01:01                  |
| CCTCTTCCCCGGGACACCCCCC                     |       |       |       |                                                 |                                      |
| 58003                                      | 58027 | 55453 | 59082 | CDS product single-stranded DNA-binding protein | 58003-58027 4:01:01                  |
| CCCTGCTCCAGCGCAACCAGATGCC                  |       |       |       |                                                 |                                      |
| 58475                                      | 58504 | 55453 | 59082 | CDS product single-stranded DNA-binding protein | 58475-58504 6:03:01                  |
| GGCAGGCAACTGGAACGGTCTCAACGGTGG             |       |       |       |                                                 |                                      |
| 58586                                      | 58608 | 55453 | 59082 | CDS product single-stranded DNA-binding protein | 58586-58608 6:03:01                  |
| GGCCGGGGGATTGGCACGGGGG                     |       |       |       |                                                 |                                      |
| 58815                                      | 58848 | 55453 | 59082 | CDS product single-stranded DNA-binding protein | 58815-58848 6:03:01                  |
| GGAGAGTGGAGCGTGGAGGCTGCCCAGGAGCTGG         |       |       |       |                                                 |                                      |
| 58962                                      | 58977 | 55453 | 59082 | CDS product single-stranded DNA-binding protein | 58962-58977 4:01:01 GGTGGCCTGGCCATGG |
| 59790                                      | 59815 | 59243 | 61570 | CDS product DNA packaging terminase subunit 2   | 59790-59815 4:01:01                  |
| GGGCAGCGGCATAGTGGTACCCCCGG                 |       |       |       |                                                 |                                      |
| 59826                                      | 59844 | 59243 | 61570 | CDS product DNA packaging terminase subunit 2   | 59826-59844 4:01:01                  |
| CCCCACCATCCCTGCTCC                         |       |       |       |                                                 |                                      |
| 60008                                      | 60051 | 59243 | 61570 | CDS product DNA packaging terminase subunit 2   | 60008-60051 8:05:02                  |
| GGCGCGGGCGGCGGAAGCGGCTCTCAGGGCCTCGAGGCCAGG |       |       |       |                                                 |                                      |

|                                               |       |       |       |                                               |             |                                     |
|-----------------------------------------------|-------|-------|-------|-----------------------------------------------|-------------|-------------------------------------|
| 60565                                         | 60583 | 59243 | 61570 | CDS product DNA packaging terminase subunit 2 | 60565-60583 | 4:01:01                             |
| GGGGCCGGCGAGTTGGGGG                           |       |       |       |                                               |             |                                     |
| 61468                                         | 61492 | 59243 | 61570 | CDS product DNA packaging terminase subunit 2 | 61468-61492 | 5:02:01                             |
| GGGGCAATTGGCGCGGAGACGGTGG                     |       |       |       |                                               |             |                                     |
| 61591                                         | 61603 | 61432 | 64374 | CDS product envelope glycoprotein B           | 61591-61603 | 4:01:01 CCACCCCCACCC                |
| 61684                                         | 61708 | 61432 | 64374 | CDS product envelope glycoprotein B           | 61684-61708 | 6:03:01 CCGTACCCACCACGCCAAGCCCCC    |
| 61846                                         | 61871 | 61432 | 64374 | CDS product envelope glycoprotein B           | 61846-61871 | 7:04:01 CCTGCCCACCGCTACCGGATCCACC   |
| 62068                                         | 62088 | 61432 | 64374 | CDS product envelope glycoprotein B           | 62068-62088 | 5:02:01 GGGTTCCGGTTTCGGTGGAGG       |
| 62226                                         | 62252 | 61432 | 64374 | CDS product envelope glycoprotein B           | 62226-62252 | 5:02:01 CCGGGGGCCAGAGCCTGGCAGACCACC |
| 62273                                         | 62291 | 61432 | 64374 | CDS product envelope glycoprotein B           | 62273-62291 | 4:01:01 GGGGTGGATGCCATGGAGG         |
| 62327                                         | 62342 | 61432 | 64374 | CDS product envelope glycoprotein B           | 62327-62342 | 5:02:01 GGAGGTGGAGGCGCGG            |
| 62344                                         | 62378 | 61432 | 64374 | CDS product envelope glycoprotein B           | 62344-62378 | 6:03:01                             |
| CCGTCTACCCCTACGACTCCTTCGCCCTGTCCACC           |       |       |       |                                               |             |                                     |
| 63009                                         | 63027 | 61432 | 64374 | CDS product envelope glycoprotein B           | 63009-63027 | 4:01:01 CCAGAACCTCAGCCAACCC         |
| 63080                                         | 63094 | 61432 | 64374 | CDS product envelope glycoprotein B           | 63080-63094 | 4:01:01 GGAGGCAACGGCAGG             |
| 63097                                         | 63119 | 61432 | 64374 | CDS product envelope glycoprotein B           | 63097-63119 | 4:01:01 CCGATTCTTCCAACGTCACCGCC     |
| 63290                                         | 63315 | 61432 | 64374 | CDS product envelope glycoprotein B           | 63290-63315 | 4:01:01 CCCGAGCGCCATAGTCTCCGCAACCC  |
| 63727                                         | 63748 | 61432 | 64374 | CDS product envelope glycoprotein B           | 63727-63748 | 4:01:01 GGGCTGAGCTGGAGGACACCGG      |
| 63875                                         | 63904 | 61432 | 64374 | CDS product envelope glycoprotein B           | 63875-63904 | 6:03:01                             |
| GGGCCTGGGTAAAGTGGGGAGGCCGTGGG                 |       |       |       |                                               |             |                                     |
| 64214                                         | 64236 | 61432 | 64374 | CDS product envelope glycoprotein B           | 64214-64236 | 4:01:01 GGTTCGGCCCTGAAAAAGCAGG      |
| 64599                                         | 64645 | 64578 | 65060 | CDS product protein V32                       | 64599-64645 | 7:04:01                             |
| CCACAGCTACCGGTGATGCCACGCCGAGCCGCGGTTTCCCCAGCC |       |       |       |                                               |             |                                     |



|                                    |       |       |       |                                                 |                                                 |
|------------------------------------|-------|-------|-------|-------------------------------------------------|-------------------------------------------------|
| 64991                              | 65010 | 64578 | 65060 | CDS product protein V32                         | 64991-65010 4:01:01 CCCGACACGCCCACCGCCCC        |
| 65211                              | 65228 | 65153 | 66142 | CDS product capsid scaffold protein             | 65211-65228 4:01:01 GGCCGGTGGACGCACTGG          |
| 65372                              | 65397 | 65153 | 66142 | CDS product capsid scaffold protein             | 65372-65397 4:01:01 GGGGCTTCCCCGGCTGGACCTGTGG   |
| 65412                              | 65445 | 65153 | 66142 | CDS product capsid scaffold protein             | 65412-65445 5:02:01                             |
| GGGTTGGCTGAGAGGGGATTCCCGGTAGCTGCGG |       |       |       |                                                 |                                                 |
| 65504                              | 65523 | 65153 | 66142 | CDS product capsid scaffold protein             | 65504-65523 5:02:01 GGAGGAACGGCTGGTATGGG        |
| 65540                              | 65567 | 65153 | 66142 | CDS product capsid scaffold protein             | 65540-65567 5:02:01 GTGCGGCTTGGGGCTGCGCGGTCACGG |
| 65613                              | 65629 | 65153 | 66142 | CDS product capsid scaffold protein             | 65613-65629 4:01:01 CCGCCCCATTAGATCC            |
| 65635                              | 65654 | 65153 | 66142 | CDS product capsid scaffold protein             | 65635-65654 5:02:01 GTGGTGGACGGGCGCCCGG         |
| 66385                              | 66407 | 65153 | 67093 | CDS product capsid maturation protease          | 66385-66407 4:01:01 CCCCTCTATGCCAGCTCTCTCC      |
| 66502                              | 66520 | 65153 | 67093 | CDS product capsid maturation protease          | 66502-66520 4:01:01 CCACGTGGCCGCGTCCCCC         |
| 66693                              | 66713 | 65153 | 67093 | CDS product capsid maturation protease          | 66693-66713 4:01:01 CCTCGTCCGGCCCAAGGCGCC       |
| 66903                              | 66921 | 65153 | 67093 | CDS product capsid maturation protease          | 66903-66921 4:01:01 CCTCCCCAACCACACACC          |
| 67680                              | 67695 | 67212 | 68975 | CDS product DNA packaging tegument protein UL25 | 67680-67695 4:01:01 CCCCCGCTCGCCCCC             |
| 67946                              | 67968 | 67212 | 68975 | CDS product DNA packaging tegument protein UL25 | 67946-67968 4:01:01                             |
| GGGTCCGACGGCGGTGCTCGTGG            |       |       |       |                                                 |                                                 |
| 68061                              | 68071 | 67212 | 68975 | CDS product DNA packaging tegument protein UL25 | 68061-68071 4:01:01 CCCCCTCCTCC                 |
| 68120                              | 68153 | 67212 | 68975 | CDS product DNA packaging tegument protein UL25 | 68120-68153 6:03:01                             |
| CCCGACCTTTCCGAGCGTTCCGTCTCCGAGTGCC |       |       |       |                                                 |                                                 |
| 68234                              | 68255 | 67212 | 68975 | CDS product DNA packaging tegument protein UL25 | 68234-68255 4:01:01                             |
| GGCGGATGGGCTAAATGGAGG              |       |       |       |                                                 |                                                 |
| 68392                              | 68405 | 67212 | 68975 | CDS product DNA packaging tegument protein UL25 | 68392-68405 4:01:01 CCACCGGCGCTCC               |
| 68435                              | 68468 | 67212 | 68975 | CDS product DNA packaging tegument protein UL25 | 68435-68468 6:03:01                             |

|                                                             |       |       |       |                                                 |                                                      |
|-------------------------------------------------------------|-------|-------|-------|-------------------------------------------------|------------------------------------------------------|
| CCAGGTGCCGAATACCACCCCGTTTGAGCCGCC                           |       |       |       |                                                 |                                                      |
| 68617                                                       | 68634 | 67212 | 68975 | CDS product DNA packaging tegument protein UL25 | 68617-68634 4:01:01                                  |
| GGGGCGTGGCGGCGTCGG                                          |       |       |       |                                                 |                                                      |
| 68771                                                       | 68796 | 67212 | 68975 | CDS product DNA packaging tegument protein UL25 | 68771-68796 5:02:01                                  |
| GGCCGCTGCGGCGGCTCTATGGCGGG                                  |       |       |       |                                                 |                                                      |
| 69273                                                       | 69295 | 69079 | 69897 | CDS product nuclear protein UL24                | 69273-69295 4:01:01 GGCTTTGGCCTTGTTTCCTTTGG          |
| 69954                                                       | 69971 | 69910 | 70968 | CDS product thymidine kinase                    | 69954-69971 4:01:01 GGGGCGCCGGTCAGGCGG               |
| 70211                                                       | 70242 | 69910 | 70968 | CDS product thymidine kinase                    | 70211-70242 6:03:01 CCAGAGCCGCTTTACCACGCCCTACCTTATCC |
| 70322                                                       | 70343 | 69910 | 70968 | CDS product thymidine kinase                    | 70322-70343 5:02:01 CCGCCACCCAGTCGCCTCTGCC           |
| 70402                                                       | 70429 | 69910 | 70968 | CDS product thymidine kinase                    | 70402-70429 5:02:01 CCATGGTTGCCACCCTACCCAGGGAACC     |
| 70590                                                       | 70617 | 69910 | 70968 | CDS product thymidine kinase                    | 70590-70617 5:02:01 GGGAGAGTATGGCGCGACGGCTGGGGGG     |
| 71266                                                       | 71282 | 71192 | 73738 | CDS product envelope glycoprotein H             | 71266-71282 4:01:01 CCCGTCCCAGCCACTCC                |
| 71479                                                       | 71537 | 71192 | 73738 | CDS product envelope glycoprotein H             | 71479-71537 9:06:02                                  |
| CCTCCGCAACACCAACCCTGTGTCGCCAACGGGCCGGAACCTGGGGACCCACGCGGGCC |       |       |       |                                                 |                                                      |
| 72140                                                       | 72157 | 71192 | 73738 | CDS product envelope glycoprotein H             | 72140-72157 4:01:01 GGATCTCCAGGGAGGTGG               |
| 72381                                                       | 72400 | 71192 | 73738 | CDS product envelope glycoprotein H             | 72381-72400 5:02:01 CCTCCGCCTCATTGTCCCCC             |
| 72609                                                       | 72627 | 71192 | 73738 | CDS product envelope glycoprotein H             | 72609-72627 4:01:01 GGTGGCCTTAGCGGACCGG              |
| 72751                                                       | 72772 | 71192 | 73738 | CDS product envelope glycoprotein H             | 72751-72772 4:01:01 CCCGAGCCAGGCGCGCCCGCCC           |
| 73577                                                       | 73599 | 71192 | 73738 | CDS product envelope glycoprotein H             | 73577-73599 4:01:01 CCGCCTTCGCGTCCTATTCGTCC          |
| 74804                                                       | 74825 | 74632 | 76224 | CDS product tegument protein UL21               | 74804-74825 5:02:01 CCTGCGCCGTCCTCCGATTCC            |
| 74988                                                       | 75004 | 74632 | 76224 | CDS product tegument protein UL21               | 74988-75004 4:01:01 GGGATCGGTGGGTGGG                 |
| 75075                                                       | 75101 | 74632 | 76224 | CDS product tegument protein UL21               | 75075-75101 5:02:01 GGCCACCAGGTGTGGGTCTGGGAGGGG      |
| 75453                                                       | 75477 | 74632 | 76224 | CDS product tegument protein UL21               | 75453-75477 4:01:01 GGGCTTTGGAATCAGGCGCACCTGG        |

|                                                         |       |       |       |                                   |
|---------------------------------------------------------|-------|-------|-------|-----------------------------------|
| 75673                                                   | 75690 | 74632 | 76224 | CDS product tegument protein UL21 |
| 75910                                                   | 75933 | 74632 | 76224 | CDS product tegument protein UL21 |
| 76095                                                   | 76115 | 74632 | 76224 | CDS product tegument protein UL21 |
| 76997                                                   | 77026 | 76793 | 77512 | CDS product envelope protein UL20 |
| CCCACGTCGTCCTGTTTGCCATTCTGCCC                           |       |       |       |                                   |
| 78103                                                   | 78129 | 77703 | 81833 | CDS product major capsid protein  |
| 78465                                                   | 78478 | 77703 | 81833 | CDS product major capsid protein  |
| 78853                                                   | 78876 | 77703 | 81833 | CDS product major capsid protein  |
| 78929                                                   | 78941 | 77703 | 81833 | CDS product major capsid protein  |
| 78971                                                   | 79015 | 77703 | 81833 | CDS product major capsid protein  |
| CCAACCCCGGACAGCCAGACCCTCGCACCTACCCACCCCAAACC            |       |       |       |                                   |
| 79173                                                   | 79186 | 77703 | 81833 | CDS product major capsid protein  |
| 79444                                                   | 79461 | 77703 | 81833 | CDS product major capsid protein  |
| 79815                                                   | 79840 | 77703 | 81833 | CDS product major capsid protein  |
| 79886                                                   | 79902 | 77703 | 81833 | CDS product major capsid protein  |
| 79935                                                   | 79985 | 77703 | 81833 | CDS product major capsid protein  |
| GGGCCGACATGGGCAGGGCCAGGGCTCAGGAGCTATGGGTGGATGGGGTGG     |       |       |       |                                   |
| 80030                                                   | 80051 | 77703 | 81833 | CDS product major capsid protein  |
| 80089                                                   | 80112 | 77703 | 81833 | CDS product major capsid protein  |
| 80245                                                   | 80255 | 77703 | 81833 | CDS product major capsid protein  |
| 80262                                                   | 80316 | 77703 | 81833 | CDS product major capsid protein  |
| CCCCAACCAGCCCCAGCGACCCGCGCCATCCGCTGAACCCACGCCACCTAGTGCC |       |       |       |                                   |
| 80346                                                   | 80372 | 77703 | 81833 | CDS product major capsid protein  |

|             |          |                             |
|-------------|----------|-----------------------------|
| 75673-75690 | 4:01:01  | GGGGGCAACTCGGTTAGG          |
| 75910-75933 | 4:01:01  | CCAAAGGCCTGGGCGCCCTGGGCC    |
| 76095-76115 | 4:01:01  | GGCCGTGGCATGGGGTCTAGG       |
| 76997-77026 | 4:01:01  |                             |
| 78103-78129 | 5:02:01  | GGCAGAGGCCCTGGGCCTTATCGGGGG |
| 78465-78478 | 4:01:01  | CCCCCTCCGTCGCC              |
| 78853-78876 | 4:01:01  | CCAGGCGACCAACGTTCCGTACCC    |
| 78929-78941 | 4:01:01  | CCGGCCACCGACC               |
| 78971-79015 | 9:06:02  |                             |
| 79173-79186 | 4:01:01  | CCCTACCCCCAGCC              |
| 79444-79461 | 5:02:01  | CCCCCTCCCCCTATGTCC          |
| 79815-79840 | 4:01:01  | CCGAGTACACCGTTCCCGGAGAAGCC  |
| 79886-79902 | 4:01:01  | CCGGCCCTGCTACCGCC           |
| 79935-79985 | 9:06:02  |                             |
| 80030-80051 | 4:01:01  | GGAAACACCGGCGGCCATTG        |
| 80089-80112 | 4:01:01  | CCCGATTGTACCTCACCACGACCC    |
| 80245-80255 | 4:01:01  | GGGGGCGGAGG                 |
| 80262-80316 | 10:07:02 |                             |
| 80346-80372 | 4:01:01  | CCAGAGTGGCCGTCGACACCGACGCCC |

|                                  |       |       |       |                                               |                     |                         |
|----------------------------------|-------|-------|-------|-----------------------------------------------|---------------------|-------------------------|
| 80454                            | 80464 | 77703 | 81833 | CDS product major capsid protein              | 80454-80464 4:01:01 | CCGCCACCGCC             |
| 80953                            | 80966 | 77703 | 81833 | CDS product major capsid protein              | 80953-80966 4:01:01 | GGCGGTTGGGGGGG          |
| 81001                            | 81015 | 77703 | 81833 | CDS product major capsid protein              | 81001-81015 4:01:01 | GGAATTGGGGGTGG          |
| 81021                            | 81040 | 77703 | 81833 | CDS product major capsid protein              | 81021-81040 5:02:01 | CCGCCGCTACGCAGCCGCC     |
| 81169                            | 81192 | 77703 | 81833 | CDS product major capsid protein              | 81169-81192 4:01:01 | CCTTGGGCCCCAGGGCCAAGGCC |
| 81234                            | 81250 | 77703 | 81833 | CDS product major capsid protein              | 81234-81250 4:01:01 | CCCACGGCCAGGCCGCC       |
| 81401                            | 81432 | 77703 | 81833 | CDS product major capsid protein              | 81401-81432 7:04:01 |                         |
| CCGGCCTACCCGAGCCGCGCCACCGTTAACCC |       |       |       |                                               |                     |                         |
| 81647                            | 81665 | 77703 | 81833 | CDS product major capsid protein              | 81647-81665 4:01:01 | GGCTCGACGGACCTGGTGG     |
| 82111                            | 82142 | 82083 | 83027 | CDS product capsid triplex subunit 2          | 82111-82142 5:02:01 |                         |
| CCTACTGCCCAGTGACCTATCTCCCGCTGACC |       |       |       |                                               |                     |                         |
| 82664                            | 82682 | 82083 | 83027 | CDS product capsid triplex subunit 2          | 82664-82682 4:01:01 | GGCGTGGCGGGTCTCTGG      |
| 82739                            | 82763 | 82083 | 83027 | CDS product capsid triplex subunit 2          | 82739-82763 4:01:01 |                         |
| CCAAACCTGCTCACCTGGGAACCC         |       |       |       |                                               |                     |                         |
| 82819                            | 82851 | 82083 | 83027 | CDS product capsid triplex subunit 2          | 82819-82851 6:03:01 |                         |
| CCAGCTCGTCCACCAGCAGCCCGTGCCCAACC |       |       |       |                                               |                     |                         |
| 82922                            | 82939 | 82083 | 83027 | CDS product capsid triplex subunit 2          | 82922-82939 4:01:01 | GGTGACGTGGTCGGTGGG      |
| 83180                            | 83196 | 83148 | 88917 | CDS product DNA packaging terminase subunit 1 | 83180-83196 5:02:01 |                         |
| GGTTGGCGGGAGGCTGG                |       |       |       |                                               |                     |                         |
| 83209                            | 83225 | 83148 | 88917 | CDS product DNA packaging terminase subunit 1 | 83209-83225 4:01:01 |                         |
| CCATCACCAGGGCCACC                |       |       |       |                                               |                     |                         |
| 83776                            | 83795 | 83148 | 88917 | CDS product DNA packaging terminase subunit 1 | 83776-83795 4:01:01 |                         |
| CCACACCGGTTCTGAAGCC              |       |       |       |                                               |                     |                         |

|                                        |       |       |       |                                                 |                                      |
|----------------------------------------|-------|-------|-------|-------------------------------------------------|--------------------------------------|
| 84414                                  | 84446 | 83148 | 88917 | CDS product DNA packaging terminase subunit 1   | 84414-84446 6:03:01                  |
| CCGGCTACCCTGTTCCATACCTCCCGGCGCACC      |       |       |       |                                                 |                                      |
| 84755                                  | 84777 | 84480 | 86600 | CDS product DNA packaging tegument protein UL17 | 84755-84777 4:01:01                  |
| CCGACAGTTCAGCGGACCACCC                 |       |       |       |                                                 |                                      |
| 85021                                  | 85045 | 84480 | 86600 | CDS product DNA packaging tegument protein UL17 | 85021-85045 4:01:01                  |
| CCACCCACAGTTTCCCAGAGCGCC               |       |       |       |                                                 |                                      |
| 85481                                  | 85504 | 84480 | 86600 | CDS product DNA packaging tegument protein UL17 | 85481-85504 4:01:01                  |
| CCCCCTCAGGGACCCAGGAGCCCC               |       |       |       |                                                 |                                      |
| 85566                                  | 85583 | 84480 | 86600 | CDS product DNA packaging tegument protein UL17 | 85566-85583 4:01:01                  |
| CCAACCCGCTCACCCCCC                     |       |       |       |                                                 |                                      |
| 85603                                  | 85618 | 84480 | 86600 | CDS product DNA packaging tegument protein UL17 | 85603-85618 4:01:01 CCACGCCGCCGTGGCC |
| 85734                                  | 85748 | 84480 | 86600 | CDS product DNA packaging tegument protein UL17 | 85734-85748 4:01:01 GGGGGGTCGGAGGG   |
| 85767                                  | 85786 | 84480 | 86600 | CDS product DNA packaging tegument protein UL17 | 85767-85786 4:01:01                  |
| CCGGGTCCATCAACCCCCC                    |       |       |       |                                                 |                                      |
| 85795                                  | 85817 | 84480 | 86600 | CDS product DNA packaging tegument protein UL17 | 85795-85817 5:02:01                  |
| GGCGTGTGTGGCGCCGGTGTGG                 |       |       |       |                                                 |                                      |
| 85901                                  | 85915 | 84480 | 86600 | CDS product DNA packaging tegument protein UL17 | 85901-85915 4:01:01 CCGCCGCCGTGGCC   |
| 86251                                  | 86264 | 84480 | 86600 | CDS product DNA packaging tegument protein UL17 | 86251-86264 5:02:01 GGCGGGGGGGCGG    |
| 86665                                  | 86695 | 86620 | 87732 | CDS product tegument protein UL16               | 86665-86695 6:03:01                  |
| CCGCGTCGTCCCCCAACCGCCAATAACCCC         |       |       |       |                                                 |                                      |
| 86826                                  | 86864 | 86620 | 87732 | CDS product tegument protein UL16               | 86826-86864 8:05:02                  |
| CCTCCCCGCCCCAAGCTACCCACACCGCCAAGTGCGCC |       |       |       |                                                 |                                      |
| 86985                                  | 87017 | 86620 | 87732 | CDS product tegument protein UL16               | 86985-87017 5:02:01                  |

|                                           |       |       |       |                                                      |                                                  |
|-------------------------------------------|-------|-------|-------|------------------------------------------------------|--------------------------------------------------|
| CCCTTTCCCGTAGGCACCCAGAGATTCCGCGCC         |       |       |       |                                                      |                                                  |
| 87048                                     | 87067 | 86620 | 87732 | CDS product tegument protein UL16                    | 87048-87067 4:01:01 CCGTCCGACATCCCTGACCC         |
| 87170                                     | 87188 | 86620 | 87732 | CDS product tegument protein UL16                    | 87170-87188 4:01:01 GGCTCCTGGCGTCTGGTGG          |
| 87251                                     | 87278 | 86620 | 87732 | CDS product tegument protein UL16                    | 87251-87278 5:02:01 GGCTGGATGGAAAGCCAGGGGTCTGGGG |
| 87554                                     | 87577 | 86620 | 87732 | CDS product tegument protein UL16                    | 87554-87577 4:01:01 GGTTGTGGGGATTGGCCGCACGG      |
| 87603                                     | 87618 | 86620 | 87732 | CDS product tegument protein UL16                    | 87603-87618 4:01:01 GGATGGAAACTGGTGG             |
| 88443                                     | 88473 | 83148 | 88917 | CDS product DNA packaging terminase subunit 1        | 88443-88473 5:02:01                              |
| GGCTACTTGGTGAAAGGCGTCTGAGGAGCGG           |       |       |       |                                                      |                                                  |
| 88568                                     | 88608 | 83148 | 88917 | CDS product DNA packaging terminase subunit 1        | 88568-88608 6:03:01                              |
| CCTGTCGCACCTTGGGGTCCACATAAGCCTCCACGGAGGCC |       |       |       |                                                      |                                                  |
| 88732                                     | 88763 | 83148 | 88917 | CDS product DNA packaging terminase subunit 1        | 88732-88763 6:03:01                              |
| GGAACGACGGTCTGGTGGCGCTGGGGAGTAGG          |       |       |       |                                                      |                                                  |
| 88892                                     | 88910 | 83148 | 88917 | CDS product DNA packaging terminase subunit 1        | 88892-88910 4:01:01                              |
| CCCTGCCCAGCACCTACC                        |       |       |       |                                                      |                                                  |
| 88957                                     | 88978 | 88947 | 89900 | CDS product tegument protein UL14                    | 88957-88978 4:01:01 GGCACGGTCTAGGCGCCAGAGG       |
| 89336                                     | 89355 | 88947 | 89900 | CDS product tegument protein UL14                    | 89336-89355 6:03:01 GGAGGAGCGGTGAGGTCCG          |
| 89452                                     | 89484 | 88947 | 89900 | CDS product tegument protein UL14                    | 89452-89484 5:02:01                              |
| CCCTCATTCTCCCCGCTCAACCTGTCCCGCCCC         |       |       |       |                                                      |                                                  |
| 90052                                     | 90076 | 89369 | 91153 | CDS product tegument serine/threonine protein kinase | 90052-90076 5:02:01                              |
| GGAGGCGCCGGTAGCTATGGAGAGG                 |       |       |       |                                                      |                                                  |
| 90312                                     | 90325 | 89369 | 91153 | CDS product tegument serine/threonine protein kinase | 90312-90325 4:01:01                              |
| CCCTCCCTCCGTCC                            |       |       |       |                                                      |                                                  |
| 90882                                     | 90906 | 89369 | 91153 | CDS product tegument serine/threonine protein kinase | 90882-90906 6:03:01                              |

|                                        |       |       |       |                                                      |                                                   |
|----------------------------------------|-------|-------|-------|------------------------------------------------------|---------------------------------------------------|
| CCCTGCCCTATTTCCCACCACCCCC              |       |       |       |                                                      |                                                   |
| 91051                                  | 91065 | 89369 | 91153 | CDS product tegument serine/threonine protein kinase | 91051-91065 4:01:01                               |
| CCGTCCGCCTTTACC                        |       |       |       |                                                      |                                                   |
| 91472                                  | 91510 | 91135 | 92832 | CDS product deoxyribonuclease                        | 91472-91510 6:03:01                               |
| GGTAGGAGAGATGGAGCTAGAGGGGATCGTGAACGCGG |       |       |       |                                                      |                                                   |
| 91544                                  | 91561 | 91135 | 92832 | CDS product deoxyribonuclease                        | 91544-91561 4:01:01 GGCTGGCTTTGTGGCCGG            |
| 91889                                  | 91906 | 91135 | 92832 | CDS product deoxyribonuclease                        | 91889-91906 4:01:01 GGTGGATCCTGGATGCGG            |
| 92428                                  | 92460 | 91135 | 92832 | CDS product deoxyribonuclease                        | 92428-92460 5:02:01                               |
| GGGACACAGGAGTTGGCGCTGTCGGTTCCGG        |       |       |       |                                                      |                                                   |
| 92521                                  | 92538 | 91135 | 92832 | CDS product deoxyribonuclease                        | 92521-92538 4:01:01 CCGGCCATTTTCCCACC             |
| 92702                                  | 92730 | 91135 | 92832 | CDS product deoxyribonuclease                        | 92702-92730 4:01:01 GGTGATTGTGGACCGCGAGGGTTGCTGGG |
| 92903                                  | 92929 | 92784 | 93008 | CDS product myristylated tegument protein            | 92903-92929 7:04:01                               |
| CCCCACCCCCACCTCTCCCGAAACCC             |       |       |       |                                                      |                                                   |
| 93452                                  | 93468 | 93120 | 94472 | CDS product envelope glycoprotein M                  | 93452-93468 4:01:01 GGCTTTGGATGCGGTGG             |
| 93477                                  | 93503 | 93120 | 94472 | CDS product envelope glycoprotein M                  | 93477-93503 5:02:01 GGGGCCTGGACGGAACCATGGCATGG    |
| 93775                                  | 93794 | 93120 | 94472 | CDS product envelope glycoprotein M                  | 93775-93794 4:01:01 CCGCGCGTCCGGGTCCGGCC          |
| 93925                                  | 93941 | 93120 | 94472 | CDS product envelope glycoprotein M                  | 93925-93941 4:01:01 CCGCCCCCAGGACTGCC             |
| 94031                                  | 94062 | 93120 | 94472 | CDS product envelope glycoprotein M                  | 94031-94062 5:02:01                               |
| GGTCGTTGGCCGGGTGCACCCGGCCACCGCGG       |       |       |       |                                                      |                                                   |
| 94040                                  | 94058 | 93120 | 94472 | CDS product envelope glycoprotein M                  | 94040-94058 4:01:01 CCGGGTGCACCCGGCCACC           |
| 94217                                  | 94238 | 93120 | 94472 | CDS product envelope glycoprotein M                  | 94217-94238 4:01:01 CCGCATCCACACTCCATCGACC        |
| 94496                                  | 94513 | 94390 | 97053 | CDS product DNA replication origin-binding helicase  | 94496-94513 4:01:01                               |
| GGGCGGCAGAGCGGAAGG                     |       |       |       |                                                      |                                                   |

|                                 |       |       |       |                                                     |                                      |
|---------------------------------|-------|-------|-------|-----------------------------------------------------|--------------------------------------|
| 94578                           | 94599 | 94390 | 97053 | CDS product DNA replication origin-binding helicase | 94578-94599 4:01:01                  |
| GGGGGCGACCTGGAAGAGTGGG          |       |       |       |                                                     |                                      |
| 94659                           | 94679 | 94390 | 97053 | CDS product DNA replication origin-binding helicase | 94659-94679 5:02:01                  |
| CCTCCGCCCAACAACCCGTCC           |       |       |       |                                                     |                                      |
| 95120                           | 95146 | 94390 | 97053 | CDS product DNA replication origin-binding helicase | 95120-95146 5:02:01                  |
| GGTGGATTCTTGGCTTCGGCGCGCGG      |       |       |       |                                                     |                                      |
| 95283                           | 95304 | 94390 | 97053 | CDS product DNA replication origin-binding helicase | 95283-95304 4:01:01                  |
| GGAACCAAGGTTATGGAGACGG          |       |       |       |                                                     |                                      |
| 95765                           | 95778 | 94390 | 97053 | CDS product DNA replication origin-binding helicase | 95765-95778 4:01:01                  |
| GGGTGGGTGGCCGG                  |       |       |       |                                                     |                                      |
| 96257                           | 96288 | 94390 | 97053 | CDS product DNA replication origin-binding helicase | 96257-96288 6:03:01                  |
| CCTGGGCGCCTGCCTGCGCCTCCCAGCGGCC |       |       |       |                                                     |                                      |
| 96474                           | 96498 | 94390 | 97053 | CDS product DNA replication origin-binding helicase | 96474-96498 5:02:01                  |
| GGGGGTCCGGGCTGGACATGTCCG        |       |       |       |                                                     |                                      |
| 97012                           | 97032 | 94390 | 97053 | CDS product DNA replication origin-binding helicase | 97012-97032 4:01:01                  |
| GGCCACAGGTTTACGGAGCGG           |       |       |       |                                                     |                                      |
| 97317                           | 97342 | 97069 | 99324 | CDS product helicase-primase subunit                | 97317-97342 4:01:01                  |
| GGGTGCTGGCCCCTGGCTCCCCTGGG      |       |       |       |                                                     |                                      |
| 97371                           | 97386 | 97069 | 99324 | CDS product helicase-primase subunit                | 97371-97386 4:01:01 GGTGGCATAACGGCGG |
| 97468                           | 97481 | 97069 | 99324 | CDS product helicase-primase subunit                | 97468-97481 4:01:01 CCCTCCGACCCGCC   |
| 97490                           | 97504 | 97069 | 99324 | CDS product helicase-primase subunit                | 97490-97504 4:01:01 GGGTGAAGGCGGTGG  |
| 97544                           | 97570 | 97069 | 99324 | CDS product helicase-primase subunit                | 97544-97570 5:02:01                  |
| GGTGGAGGTAGACTTGACCCAGCGGG      |       |       |       |                                                     |                                      |



|                                                                            |        |        |        |                                      |               |          |                           |
|----------------------------------------------------------------------------|--------|--------|--------|--------------------------------------|---------------|----------|---------------------------|
| 98112                                                                      | 98131  | 97069  | 99324  | CDS product helicase-primase subunit | 98112-98131   | 4:01:01  | GGGCTGTGGCCGGCTCTAGG      |
| 98153                                                                      | 98225  | 97069  | 99324  | CDS product helicase-primase subunit | 98153-98225   | 13:10:03 |                           |
| GGCTCCATGGGACCCGGAAGACAGGTGGCCCGGTGAATCGGAGGCCAAAACGGGTAGAGGGGGCGGTACACAGG |        |        |        |                                      |               |          |                           |
| 98235                                                                      | 98265  | 97069  | 99324  | CDS product helicase-primase subunit | 98235-98265   | 6:03:01  |                           |
| GGTACCGAGGATGATTGGGGGGCTGGGCGGG                                            |        |        |        |                                      |               |          |                           |
| 98471                                                                      | 98504  | 97069  | 99324  | CDS product helicase-primase subunit | 98471-98504   | 5:02:01  |                           |
| CCCCGTAGCCTATAGGTCCATCATAGCCCTATCC                                         |        |        |        |                                      |               |          |                           |
| 98577                                                                      | 98596  | 97069  | 99324  | CDS product helicase-primase subunit | 98577-98596   | 4:01:01  | GGCTTTTGGGGGGCAGCCGG      |
| 99558                                                                      | 99583  | 99421  | 100332 | CDS product tegument protein UL7     | 99558-99583   | 5:02:01  | GGGGCAGGGGTGATGGGTCTTTTGG |
| 99695                                                                      | 99715  | 99421  | 100332 | CDS product tegument protein UL7     | 99695-99715   | 4:01:01  | GGTCAAAGGGGTTGTGGTTGG     |
| 100067                                                                     | 100082 | 99421  | 100332 | CDS product tegument protein UL7     | 100067-100082 | 4:01:01  | CCGAGCCCTCCTGTCC          |
| 100143                                                                     | 100169 | 99421  | 100332 | CDS product tegument protein UL7     | 100143-100169 | 6:03:01  |                           |
| GGTCGTGAAGGAGGGGGGTAGGCCTGG                                                |        |        |        |                                      |               |          |                           |
| 100803                                                                     | 100827 | 100130 | 102391 | CDS product capsid portal protein    | 100803-100827 | 5:02:01  |                           |
| CCTCGTGCCCGAGTCCTCCCGCGCC                                                  |        |        |        |                                      |               |          |                           |
| 100882                                                                     | 100897 | 100130 | 102391 | CDS product capsid portal protein    | 100882-100897 | 4:01:01  | CCCGTCTGCCGCCGCC          |
| 101024                                                                     | 101046 | 100130 | 102391 | CDS product capsid portal protein    | 101024-101046 | 4:01:01  | CCCTCCAACATCCCGTTAATGCC   |
| 101307                                                                     | 101362 | 100130 | 102391 | CDS product capsid portal protein    | 101307-101362 | 10:07:02 |                           |
| CCACGGCCTTGAGAGCCACCCAGGGCCCTGGGCCTCGTCCTTTTCCTGCCACC                      |        |        |        |                                      |               |          |                           |
| 101605                                                                     | 101627 | 100130 | 102391 | CDS product capsid portal protein    | 101605-101627 | 4:01:01  | GGCCACGCTGGCGGTGCACCTGG   |
| 101623                                                                     | 101653 | 100130 | 102391 | CDS product capsid portal protein    | 101623-101653 | 7:04:01  |                           |
| CCTGGCCAGCTCCACCACGGCCTCCAACCCC                                            |        |        |        |                                      |               |          |                           |
| 101759                                                                     | 101780 | 100130 | 102391 | CDS product capsid portal protein    | 101759-101780 | 5:02:01  | GGGTGGACGGTCGCGCCGGGGG    |

|                                                                      |        |        |        |                                               |               |          |                              |
|----------------------------------------------------------------------|--------|--------|--------|-----------------------------------------------|---------------|----------|------------------------------|
| 101839                                                               | 101873 | 100130 | 102391 | CDS product capsid portal protein             | 101839-101873 | 6:03:01  |                              |
| GGCAAAGCTGGCGGTGCCGTCGGGTTGCTGGCGG                                   |        |        |        |                                               |               |          |                              |
| 102900                                                               | 102915 | 102375 | 105020 | CDS product helicase-primase helicase subunit | 102900-102915 | 4:01:01  |                              |
| CCTCGAGCCCGCCTCC                                                     |        |        |        |                                               |               |          |                              |
| 103831                                                               | 103859 | 102375 | 105020 | CDS product helicase-primase helicase subunit | 103831-103859 | 5:02:01  |                              |
| GGAACACGGAGTAGTGGTGGCCAGAACGG                                        |        |        |        |                                               |               |          |                              |
| 104078                                                               | 104120 | 102375 | 105020 | CDS product helicase-primase helicase subunit | 104078-104120 | 8:05:02  |                              |
| GGGCTGGACGAGGGGAGGGTCCGGGAGGCGTACAGGCGCATGG                          |        |        |        |                                               |               |          |                              |
| 104722                                                               | 104762 | 102375 | 105020 | CDS product helicase-primase helicase subunit | 104722-104762 | 7:04:01  |                              |
| GGAGTCGGTGGACGACGTGGAGCTGGACATGGCCACCGCGG                            |        |        |        |                                               |               |          |                              |
| 105341                                                               | 105353 | 105070 | 105747 | CDS product nuclear protein UL4               | 105341-105353 | 4:01:01  | CCCCCTGACCACC                |
| 105356                                                               | 105375 | 105070 | 105747 | CDS product nuclear protein UL4               | 105356-105375 | 5:02:01  | GGACGGGTCGGTACTGGTGG         |
| 105547                                                               | 105581 | 105070 | 105747 | CDS product nuclear protein UL4               | 105547-105581 | 7:04:01  |                              |
| CCGTATGTTCCACCGCTGCCATAACCGACGCCTCC                                  |        |        |        |                                               |               |          |                              |
| 105684                                                               | 105711 | 105070 | 105747 | CDS product nuclear protein UL4               | 105684-105711 | 4:01:01  | GGTACCAACGGAGCCTCGGCGTTGCTGG |
| 105714                                                               | 105734 | 105070 | 105747 | CDS product nuclear protein UL4               | 105714-105734 | 4:01:01  | CCGTGTTTTCCCTGCCTTTCC        |
| 105986                                                               | 106004 | 105877 | 106416 | CDS product protein V57                       | 105986-106004 | 4:01:01  | CCTCGCCGCGGCTGCCGCC          |
| 106136                                                               | 106205 | 105877 | 106416 | CDS product protein V57                       | 106136-106205 | 11:08:02 |                              |
| CCATGGCCAGGGCCCGAGCGTTCAGAAAGCCTCTCCGAGAGGGCCAGCTGTCCGTCGCCACCCGCCCC |        |        |        |                                               |               |          |                              |
| 106323                                                               | 106347 | 105877 | 106416 | CDS product protein V57                       | 106323-106347 | 6:03:01  | GGCGGCAAGCTTGGCGGCGGCCCGG    |
| 106768                                                               | 106787 | 106478 | 107116 | CDS product nuclear protein UL3               | 106768-106787 | 4:01:01  | GGAGAACGAGGAGGTTTTGG         |
| 106945                                                               | 106965 | 106478 | 107116 | CDS product nuclear protein UL3               | 106945-106965 | 4:01:01  | GGATTCCACGGAAGGTCGGG         |
| 106976                                                               | 106994 | 106478 | 107116 | CDS product nuclear protein UL3               | 106976-106994 | 4:01:01  | GGGGTTGGGGTGAAGTGG           |

|                                 |        |        |        |                                      |
|---------------------------------|--------|--------|--------|--------------------------------------|
| 107014                          | 107025 | 106478 | 107116 | CDS product nuclear protein UL3      |
| 107077                          | 107088 | 106478 | 107116 | CDS product nuclear protein UL3      |
| 107350                          | 107374 | 107206 | 108144 | CDS product uracil-DNA glycosylase   |
| GGGGAGCAGGACTTCTGGGCGTGGG       |        |        |        |                                      |
| 107429                          | 107454 | 107206 | 108144 | CDS product uracil-DNA glycosylase   |
| CCGCCCTGACCAGCCTGTGCCACCCC      |        |        |        |                                      |
| 107518                          | 107546 | 107206 | 108144 | CDS product uracil-DNA glycosylase   |
| CCCTGTTCGCCCACCTTTCCAAAAACCC    |        |        |        |                                      |
| 107660                          | 107685 | 107206 | 108144 | CDS product uracil-DNA glycosylase   |
| GGCCCGGCGCGTGGTACGGATCCTGG      |        |        |        |                                      |
| 110391                          | 110421 | 110387 | 111985 | CDS product ubiquitin E3 ligase ICP0 |
| GGTTTCTCCGGTATCTTTGGCAGTTGTGGGG |        |        |        |                                      |
| 110528                          | 110544 | 110387 | 111985 | CDS product ubiquitin E3 ligase ICP0 |
| 110635                          | 110656 | 110387 | 111985 | CDS product ubiquitin E3 ligase ICP0 |
| CCCACCAAATAGCCCTGCTCCC          |        |        |        |                                      |
| 110849                          | 110874 | 110387 | 111985 | CDS product ubiquitin E3 ligase ICP0 |
| GGTGCAACGGGTGGTCCCGGGGGGG       |        |        |        |                                      |
| 110981                          | 111001 | 110387 | 111985 | CDS product ubiquitin E3 ligase ICP0 |
| GGCTGATCGGTGGTATTCAGG           |        |        |        |                                      |
| 111082                          | 111106 | 110387 | 111985 | CDS product ubiquitin E3 ligase ICP0 |
| GGTGCGGGAGTTGGTTCTGGGCTGG       |        |        |        |                                      |
| 111153                          | 111177 | 110387 | 111985 | CDS product ubiquitin E3 ligase ICP0 |
| CCGGCCTTCTCCCCCGTCTGCGCCC       |        |        |        |                                      |

|               |         |                   |
|---------------|---------|-------------------|
| 107014-107025 | 4:01:01 | GGGGGCTGGTGG      |
| 107077-107088 | 4:01:01 | CCACCCCCACCC      |
| 107350-107374 | 4:01:01 |                   |
| 107429-107454 | 6:03:01 |                   |
| 107518-107546 | 6:03:01 |                   |
| 107660-107685 | 5:02:01 |                   |
| 110391-110421 | 4:01:01 |                   |
| 110528-110544 | 4:01:01 | GGGTAGGGCACCGGGGG |
| 110635-110656 | 4:01:01 |                   |
| 110849-110874 | 5:02:01 |                   |
| 110981-111001 | 4:01:01 |                   |
| 111082-111106 | 5:02:01 |                   |
| 111153-111177 | 5:02:01 |                   |

|                                              |        |        |        |                                            |               |         |                 |
|----------------------------------------------|--------|--------|--------|--------------------------------------------|---------------|---------|-----------------|
| 111181                                       | 111195 | 110387 | 111985 | CDS product ubiquitin E3 ligase ICP0       | 111181-111195 | 4:01:01 | GGTGGGTGGCCCCGG |
| 111281                                       | 111301 | 110387 | 111985 | CDS product ubiquitin E3 ligase ICP0       | 111281-111301 | 4:01:01 |                 |
| GGGTCCGTTAGGTTGTTGGG                         |        |        |        |                                            |               |         |                 |
| 111589                                       | 111610 | 110387 | 111985 | CDS product ubiquitin E3 ligase ICP0       | 111589-111610 | 5:02:01 |                 |
| CCTTTCGACCAGCCAGTCCACC                       |        |        |        |                                            |               |         |                 |
| 114148                                       | 114181 | 114128 | 118591 | CDS product transcriptional regulator ICP4 | 114148-114181 | 7:04:01 |                 |
| CCAGTCTCCTCCGTCCTCGTCGTCGACACCACC            |        |        |        |                                            |               |         |                 |
| 114193                                       | 114238 | 114128 | 118591 | CDS product transcriptional regulator ICP4 | 114193-114238 | 8:05:02 |                 |
| GGGAGCGCGGCGGAGGGCCTGGGCCACGCCGGGCTCGGGCCGGG |        |        |        |                                            |               |         |                 |
| 114246                                       | 114270 | 114128 | 118591 | CDS product transcriptional regulator ICP4 | 114246-114270 | 5:02:01 |                 |
| CCACCAGCTCCACATCGCCGGCCCC                    |        |        |        |                                            |               |         |                 |
| 114350                                       | 114374 | 114128 | 118591 | CDS product transcriptional regulator ICP4 | 114350-114374 | 4:01:01 |                 |
| CCGAACCCGGGCTCCCAGTCGACCC                    |        |        |        |                                            |               |         |                 |
| 114377                                       | 114408 | 114128 | 118591 | CDS product transcriptional regulator ICP4 | 114377-114408 | 6:03:01 |                 |
| GGGGCTCGGCGGCGGGAGCCTCGGTGATGG               |        |        |        |                                            |               |         |                 |
| 114417                                       | 114438 | 114128 | 118591 | CDS product transcriptional regulator ICP4 | 114417-114438 | 4:01:01 |                 |
| GGGGCTCGGCCTCGGCGTCGG                        |        |        |        |                                            |               |         |                 |
| 114492                                       | 114525 | 114128 | 118591 | CDS product transcriptional regulator ICP4 | 114492-114525 | 6:03:01 |                 |
| CCGAGGGCTCCACGGCCCCAGCGCCGCGCCGCC            |        |        |        |                                            |               |         |                 |
| 114522                                       | 114544 | 114128 | 118591 | CDS product transcriptional regulator ICP4 | 114522-114544 | 4:01:01 |                 |
| GGCCGCAGGCGAGGTACACGGG                       |        |        |        |                                            |               |         |                 |
| 114570                                       | 114586 | 114128 | 118591 | CDS product transcriptional regulator ICP4 | 114570-114586 | 4:01:01 |                 |
| GGTTGGCCGCGCGGTGG                            |        |        |        |                                            |               |         |                 |

|        |        |        |        |                                                                                             |               |         |                  |
|--------|--------|--------|--------|---------------------------------------------------------------------------------------------|---------------|---------|------------------|
| 114614 | 114644 | 114128 | 118591 | CDS product transcriptional regulator ICP4<br>GGGTCGTGGAACCCGAGGCCCTCGGCCTGGG               | 114614-114644 | 5:02:01 |                  |
| 114625 | 114663 | 114128 | 118591 | CDS product transcriptional regulator ICP4<br>CCCAGGCCCTCGGCCTGGGCCGCATGTCCTGCAGCC          | 114625-114663 | 6:03:01 |                  |
| 114673 | 114691 | 114128 | 118591 | CDS product transcriptional regulator ICP4<br>GGGCAGGACGCGCTGGCGG                           | 114673-114691 | 4:01:01 |                  |
| 114751 | 114769 | 114128 | 118591 | CDS product transcriptional regulator ICP4<br>GGCCACGTTGGAGGAGCGG                           | 114751-114769 | 4:01:01 |                  |
| 114849 | 114894 | 114128 | 118591 | CDS product transcriptional regulator ICP4<br>GGGTGCTGGAGGTGAGGACCGCGCGGCTGAGGTGGCGCTCCCGGG | 114849-114894 | 8:05:02 |                  |
| 114968 | 114985 | 114128 | 118591 | CDS product transcriptional regulator ICP4<br>CCGTCCTGGGGCCAATCC                            | 114968-114985 | 4:01:01 |                  |
| 115024 | 115048 | 114128 | 118591 | CDS product transcriptional regulator ICP4<br>GGCGGAGCCCAGGCGCAGGCAGAGG                     | 115024-115048 | 5:02:01 |                  |
| 115063 | 115082 | 114128 | 118591 | CDS product transcriptional regulator ICP4<br>GGTGAAGGCCAGGTCCCCGG                          | 115063-115082 | 4:01:01 |                  |
| 115116 | 115151 | 114128 | 118591 | CDS product transcriptional regulator ICP4<br>CCGAGACGTCCGGGGCCCCGGTCCAGTTGCCGGCCC          | 115116-115151 | 6:03:01 |                  |
| 115147 | 115190 | 114128 | 118591 | CDS product transcriptional regulator ICP4<br>GGCCCAGGCGTGGGACCGCTTGGTGAGGATGCGGTTCCCCAGGG  | 115147-115190 | 7:04:01 |                  |
| 115183 | 115216 | 114128 | 118591 | CDS product transcriptional regulator ICP4<br>CCCCAGGGCCGCGCAGCAGCGCGAGAGTCCCCC             | 115183-115216 | 6:03:01 |                  |
| 115255 | 115270 | 114128 | 118591 | CDS product transcriptional regulator ICP4                                                  | 115255-115270 | 4:01:01 | GGGGCGGGAGGCCGGG |

|        |        |        |        |                                                                                                           |               |          |               |
|--------|--------|--------|--------|-----------------------------------------------------------------------------------------------------------|---------------|----------|---------------|
| 115266 | 115294 | 114128 | 118591 | CDS product transcriptional regulator ICP4<br>CCGGGAGTCCGCCAGCAGGTCCTCGTCC                                | 115266-115294 | 5:02:01  |               |
| 115314 | 115330 | 114128 | 118591 | CDS product transcriptional regulator ICP4<br>CCACCACCTTCACGTCC                                           | 115314-115330 | 4:01:01  |               |
| 115379 | 115398 | 114128 | 118591 | CDS product transcriptional regulator ICP4<br>CCGCTGGCCGCCAGTCCCC                                         | 115379-115398 | 4:01:01  |               |
| 115409 | 115428 | 114128 | 118591 | CDS product transcriptional regulator ICP4<br>CCGTCCCGGGCCGGGGGCC                                         | 115409-115428 | 4:01:01  |               |
| 115437 | 115472 | 114128 | 118591 | CDS product transcriptional regulator ICP4<br>GGGCCGCGATGGTGGCCAGGGCTGGGGATCGAAGG                         | 115437-115472 | 6:03:01  |               |
| 115481 | 115507 | 114128 | 118591 | CDS product transcriptional regulator ICP4<br>GGGCGCCAGGCCTCGGGGAACAGCTGG                                 | 115481-115507 | 4:01:01  |               |
| 115620 | 115679 | 114128 | 118591 | CDS product transcriptional regulator ICP4<br>GGTCGGGGCCCTCGGCTGGCATGGGTCCCAGGGCCCGGGAGCCTGGTGGCCCCGGGTGG | 115620-115679 | 11:08:02 |               |
| 115646 | 115685 | 114128 | 118591 | CDS product transcriptional regulator ICP4<br>CCCAGGGCCCGGGAGCCTGGTGGCCCGGGTGGCCACCC                      | 115646-115685 | 6:03:01  |               |
| 115693 | 115705 | 114128 | 118591 | CDS product transcriptional regulator ICP4                                                                | 115693-115705 | 4:01:01  | GGGGCCCGGAGGG |
| 115737 | 115796 | 114128 | 118591 | CDS product transcriptional regulator ICP4<br>GGGCGGACGAGGAGAAGGAGGCCGAGGCTCCGGCCTGGGCCCGGGCTCCAGGGGCTCGG | 115737-115796 | 11:08:02 |               |
| 115758 | 115786 | 114128 | 118591 | CDS product transcriptional regulator ICP4<br>CCGAGGCTCCGGCCTGGGCCGCCGGCTCC                               | 115758-115786 | 6:03:01  |               |
| 115801 | 115830 | 114128 | 118591 | CDS product transcriptional regulator ICP4<br>CCGCTTGCCGCTCTTGCCCCTGGGGCGCCC                              | 115801-115830 | 4:01:01  |               |

|        |        |        |        |                                                                                             |               |         |                  |
|--------|--------|--------|--------|---------------------------------------------------------------------------------------------|---------------|---------|------------------|
| 115822 | 115843 | 114128 | 118591 | CDS product transcriptional regulator ICP4<br>GGGGCGCCCGTGGATGGCACGG                        | 115822-115843 | 4:01:01 |                  |
| 115875 | 115898 | 114128 | 118591 | CDS product transcriptional regulator ICP4<br>GGCTGAGGTGGGCCGGGAGGCGG                       | 115875-115898 | 6:03:01 |                  |
| 115962 | 115985 | 114128 | 118591 | CDS product transcriptional regulator ICP4<br>GGGTGGCCCGGCAGCAGGTGGCGG                      | 115962-115985 | 6:03:01 |                  |
| 115992 | 116007 | 114128 | 118591 | CDS product transcriptional regulator ICP4                                                  | 115992-116007 | 4:01:01 | CCCCGGCGCCTCCGCC |
| 116013 | 116047 | 114128 | 118591 | CDS product transcriptional regulator ICP4<br>GGGAGTGCTGGGGGACTGGGAGTGGGACGAGGGG            | 116013-116047 | 6:03:01 |                  |
| 116068 | 116104 | 114128 | 118591 | CDS product transcriptional regulator ICP4<br>GGGGACGGTGGGCCACAGGGCGGCAGGGTCTGAAGG          | 116068-116104 | 7:04:01 |                  |
| 116107 | 116127 | 114128 | 118591 | CDS product transcriptional regulator ICP4<br>CCCCTCCGCGCCGCGGAGCC                          | 116107-116127 | 4:01:01 |                  |
| 116116 | 116136 | 114128 | 118591 | CDS product transcriptional regulator ICP4<br>GGCCGCGGAGCCGGAAGGG                           | 116116-116136 | 4:01:01 |                  |
| 116146 | 116171 | 114128 | 118591 | CDS product transcriptional regulator ICP4<br>GGGCGAGGACGATGAGGGCTGCTGGG                    | 116146-116171 | 4:01:01 |                  |
| 116180 | 116201 | 114128 | 118591 | CDS product transcriptional regulator ICP4<br>GGTGGGGCCAGCAGGGACACGG                        | 116180-116201 | 4:01:01 |                  |
| 116202 | 116224 | 114128 | 118591 | CDS product transcriptional regulator ICP4<br>CCTCCCCAACATCCCCCGACC                         | 116202-116224 | 6:03:01 |                  |
| 116245 | 116291 | 114128 | 118591 | CDS product transcriptional regulator ICP4<br>GGCCTGGGTGACGGTCCAGGCCGAGGCCGGGGCCCCCGCCCTCGG | 116245-116291 | 8:05:02 |                  |

|                                                                                                                          |               |          |                 |
|--------------------------------------------------------------------------------------------------------------------------|---------------|----------|-----------------|
| 116260 116287 114128 118591 CDS product transcriptional regulator ICP4<br>CCAGGCCGAGGCCCGGGCCCGGGCCCC                    | 116260-116287 | 6:03:01  |                 |
| 116304 116332 114128 118591 CDS product transcriptional regulator ICP4<br>CCAGCGGCGCCACGGTCCGGGCCACCACC                  | 116304-116332 | 6:03:01  |                 |
| 116365 116386 114128 118591 CDS product transcriptional regulator ICP4<br>GGAGCCCAGGCGGTGGGTAGGG                         | 116365-116386 | 5:02:01  |                 |
| 116394 116426 114128 118591 CDS product transcriptional regulator ICP4<br>CCCCGAGGAGCCTGGCCCGCTCGACCAGGTCCC              | 116394-116426 | 5:02:01  |                 |
| 116448 116467 114128 118591 CDS product transcriptional regulator ICP4<br>CCGCCGTCTCCAGCCCGGCC                           | 116448-116467 | 5:02:01  |                 |
| 116488 116509 114128 118591 CDS product transcriptional regulator ICP4<br>GGGAGGGCAGGCGGGAGAGGGG                         | 116488-116509 | 5:02:01  |                 |
| 116553 116567 114128 118591 CDS product transcriptional regulator ICP4                                                   | 116553-116567 | 4:01:01  | GGAGGCCGAGGAGGG |
| 116626 116672 114128 118591 CDS product transcriptional regulator ICP4<br>GGCGGACGGCCTGGGCGCCCTGGTCCCCGAGCGGCCGCGGCCGCGG | 116626-116672 | 9:06:02  |                 |
| 116635 116677 114128 118591 CDS product transcriptional regulator ICP4<br>CCTGGGCGCCCTGGTCCCCGAGCGGCCGCGGCCGCGGCAGCC     | 116635-116677 | 6:03:01  |                 |
| 116724 116754 114128 118591 CDS product transcriptional regulator ICP4<br>GGACGCGGACCGAGGGCGCCGGGGCCTCGGG                | 116724-116754 | 5:02:01  |                 |
| 116763 116810 114128 118591 CDS product transcriptional regulator ICP4<br>GGCTGGCCGCGGCAGCGCGGCCTGGGCCGGGTAGCCGCCACGGCGG | 116763-116810 | 10:07:02 |                 |
| 116784 116803 114128 118591 CDS product transcriptional regulator ICP4<br>CCTGGGCCGGGTAGCCGGCC                           | 116784-116803 | 4:01:01  |                 |



|                                                       |        |        |        |                                            |               |         |                 |
|-------------------------------------------------------|--------|--------|--------|--------------------------------------------|---------------|---------|-----------------|
| 116820                                                | 116833 | 114128 | 118591 | CDS product transcriptional regulator ICP4 | 116820-116833 | 4:01:01 | CCGGCCTCCCCGCC  |
| 116863                                                | 116884 | 114128 | 118591 | CDS product transcriptional regulator ICP4 | 116863-116884 | 5:02:01 |                 |
| GGCGCGCCGGAGGCTCTGGAGG                                |        |        |        |                                            |               |         |                 |
| 116913                                                | 116936 | 114128 | 118591 | CDS product transcriptional regulator ICP4 | 116913-116936 | 5:02:01 |                 |
| GGCGGCTCATGGCCACCGAGGCGG                              |        |        |        |                                            |               |         |                 |
| 116965                                                | 116985 | 114128 | 118591 | CDS product transcriptional regulator ICP4 | 116965-116985 | 4:01:01 |                 |
| CCCGGCCGCCATGGCGTCCCC                                 |        |        |        |                                            |               |         |                 |
| 116991                                                | 117005 | 114128 | 118591 | CDS product transcriptional regulator ICP4 | 116991-117005 | 4:01:01 | GGGGCAGGGGGTTGG |
| 117258                                                | 117291 | 114128 | 118591 | CDS product transcriptional regulator ICP4 | 117258-117291 | 6:03:01 |                 |
| CCCACAGCCCGTCCCGCGAGTCCCGGTCCCCC                      |        |        |        |                                            |               |         |                 |
| 117321                                                | 117342 | 114128 | 118591 | CDS product transcriptional regulator ICP4 | 117321-117342 | 4:01:01 |                 |
| CCGACCCGGGCCAGGGGTCCCC                                |        |        |        |                                            |               |         |                 |
| 117328                                                | 117350 | 114128 | 118591 | CDS product transcriptional regulator ICP4 | 117328-117350 | 4:01:01 |                 |
| GGGCCAGGGGTCCCCGACGGGG                                |        |        |        |                                            |               |         |                 |
| 117393                                                | 117406 | 114128 | 118591 | CDS product transcriptional regulator ICP4 | 117393-117406 | 4:01:01 | CCGCCGCCGGGGCC  |
| 117420                                                | 117436 | 114128 | 118591 | CDS product transcriptional regulator ICP4 | 117420-117436 | 4:01:01 |                 |
| CCGCCGCCCGGTAGCC                                      |        |        |        |                                            |               |         |                 |
| 117479                                                | 117533 | 114128 | 118591 | CDS product transcriptional regulator ICP4 | 117479-117533 | 9:06:02 |                 |
| GGGGCCTCCTCGGCCGTGCCTGGGTCTGGGTCTGGGTATGGGTCTGGGGTTGG |        |        |        |                                            |               |         |                 |
| 117483                                                | 117499 | 114128 | 118591 | CDS product transcriptional regulator ICP4 | 117483-117499 | 4:01:01 |                 |
| CCTCCTCGGCCGGTGCC                                     |        |        |        |                                            |               |         |                 |
| 117572                                                | 117615 | 114128 | 118591 | CDS product transcriptional regulator ICP4 | 117572-117615 | 8:05:02 |                 |
| GGACGCTGGTCCTTGGGGAGCCGGTGAGGGTCCGGCCCCGGCGG          |        |        |        |                                            |               |         |                 |

|                                                    |        |        |        |                                            |               |         |               |
|----------------------------------------------------|--------|--------|--------|--------------------------------------------|---------------|---------|---------------|
| 117710                                             | 117721 | 114128 | 118591 | CDS product transcriptional regulator ICP4 | 117710-117721 | 4:01:01 | GGAGGGAGGAGG  |
| 117731                                             | 117747 | 114128 | 118591 | CDS product transcriptional regulator ICP4 | 117731-117747 | 4:01:01 |               |
| GGGCGGCTGGGAGCGGG                                  |        |        |        |                                            |               |         |               |
| 117758                                             | 117799 | 114128 | 118591 | CDS product transcriptional regulator ICP4 | 117758-117799 | 8:05:02 |               |
| GGAGCCGAGCGGGTGCGCCGGGGAAGCGGCGCCGAGCGG            |        |        |        |                                            |               |         |               |
| 117809                                             | 117832 | 114128 | 118591 | CDS product transcriptional regulator ICP4 | 117809-117832 | 5:02:01 |               |
| GGGGTGGCGGCCCCAGCGGCCGGG                           |        |        |        |                                            |               |         |               |
| 117819                                             | 117843 | 114128 | 118591 | CDS product transcriptional regulator ICP4 | 117819-117843 | 4:01:01 |               |
| CCCCAGCGGCCGGGCGATCCCCTCC                          |        |        |        |                                            |               |         |               |
| 117844                                             | 117887 | 114128 | 118591 | CDS product transcriptional regulator ICP4 | 117844-117887 | 8:05:02 |               |
| GGAGGACGGCCCCGGGAGAGCCGGCGGCCGAGGGGTTTCGCGG        |        |        |        |                                            |               |         |               |
| 117918                                             | 117930 | 114128 | 118591 | CDS product transcriptional regulator ICP4 | 117918-117930 | 4:01:01 | CCTCCTCGCCGCC |
| 117978                                             | 118009 | 114128 | 118591 | CDS product transcriptional regulator ICP4 | 117978-118009 | 6:03:01 |               |
| CCCCGGCACCATCCGCCTGGTCGTCCTCGTCC                   |        |        |        |                                            |               |         |               |
| 118051                                             | 118090 | 114128 | 118591 | CDS product transcriptional regulator ICP4 | 118051-118090 | 7:04:01 |               |
| CCGGACCCGGGGTGCCGGGGACCCTCCGCCCCGGGAGGCC           |        |        |        |                                            |               |         |               |
| 118082                                             | 118133 | 114128 | 118591 | CDS product transcriptional regulator ICP4 | 118082-118133 | 9:06:02 |               |
| GGGGAGGCCGAGGATGGAACTCGGGCTGCGGGGACCCGGGCAGGTCTCGG |        |        |        |                                            |               |         |               |
| 118152                                             | 118176 | 114128 | 118591 | CDS product transcriptional regulator ICP4 | 118152-118176 | 5:02:01 |               |
| CCGGGTGCGCCGCGTCCCCACCGCC                          |        |        |        |                                            |               |         |               |
| 118177                                             | 118201 | 114128 | 118591 | CDS product transcriptional regulator ICP4 | 118177-118201 | 4:01:01 |               |
| GGGTGATGAGGAGCCCGTGCCCCG                           |        |        |        |                                            |               |         |               |
| 118190                                             | 118219 | 114128 | 118591 | CDS product transcriptional regulator ICP4 | 118190-118219 | 5:02:01 |               |

|                                                                        |               |          |                      |
|------------------------------------------------------------------------|---------------|----------|----------------------|
| CCCGTGGCCCGGCGACCGTTCCCCGGGGCC                                         |               |          |                      |
| 118214 118231 114128 118591 CDS product transcriptional regulator ICP4 | 118214-118231 | 4:01:01  |                      |
| GGGGCCACGGAGGAGTGG                                                     |               |          |                      |
| 118259 118295 114128 118591 CDS product transcriptional regulator ICP4 | 118259-118295 | 7:04:01  |                      |
| GGAGCCGGGCTGGGTGCCGGGGACGCCGGCTGGGCGG                                  |               |          |                      |
| 118316 118333 114128 118591 CDS product transcriptional regulator ICP4 | 118316-118333 | 4:01:01  |                      |
| CCGCCGCTGCCGGCGGCC                                                     |               |          |                      |
| 118342 118359 114128 118591 CDS product transcriptional regulator ICP4 | 118342-118359 | 4:01:01  |                      |
| CCGCTTCGCCTTCCCTCC                                                     |               |          |                      |
| 118362 118390 114128 118591 CDS product transcriptional regulator ICP4 | 118362-118390 | 6:03:01  |                      |
| GGGGCTCGGGAGTCGGAGACGGCGGAGGG                                          |               |          |                      |
| 118458 118478 114128 118591 CDS product transcriptional regulator ICP4 | 118458-118478 | 5:02:01  |                      |
| GGTCGGGCGCGGCGGGCTGGG                                                  |               |          |                      |
| 118492 118519 114128 118591 CDS product transcriptional regulator ICP4 | 118492-118519 | 5:02:01  |                      |
| GGCCGCGCTGGCTGCGCGGATGAGGGGG                                           |               |          |                      |
| 121430 121473 121368 122249 CDS product regulatory protein ICP22       | 121430-121473 | 11:08:02 |                      |
| CCGTCCACCAGCCCCCTCATCCCGTCCCTGACCCCCCTCGCCCCC                          |               |          |                      |
| 121483 121502 121368 122249 CDS product regulatory protein ICP22       | 121483-121502 | 4:01:01  | CCCGTCCCCACGCTCCAGCC |
| 121533 121566 121368 122249 CDS product regulatory protein ICP22       | 121533-121566 | 6:03:01  |                      |
| GGCTCCCCGGCGGCTCGGACCATCCGAATACGG                                      |               |          |                      |
| 121571 121614 121368 122249 CDS product regulatory protein ICP22       | 121571-121614 | 7:04:01  |                      |
| CCGCTATCCCCGCGGGCCCTGCGCCCGTACCTGGCCCGGGGGCC                           |               |          |                      |
| 121603 121619 121368 122249 CDS product regulatory protein ICP22       | 121603-121619 | 4:01:01  | GGCCCGGGGGCCAGGGG    |

121695 121717 121368 122249 CDS product regulatory protein ICP22  
CCACCTCCTCGATCCACGTGACC

121894 121925 121368 122249 CDS product regulatory protein ICP22  
CCTGGAGCCGCCGAGCGACCCCCGAATACCC

122065 122078 121368 122249 CDS product regulatory protein ICP22

122136 122171 121368 122249 CDS product regulatory protein ICP22  
CCGATGCCCCACCAACAACCACCACCCTACAACCC

122194 122212 121368 122249 CDS product regulatory protein ICP22

122912 122959 122862 123572 CDS product virion protein US10  
GGCGAGGAGTCCGGAGCGGGGACGGGGACGGGGCGGGCGGGACGGG

123049 123062 122862 123572 CDS product virion protein US10

123081 123105 122862 123572 CDS product virion protein US10

123150 123170 122862 123572 CDS product virion protein US10

123214 123236 122862 123572 CDS product virion protein US10

123448 123466 122862 123572 CDS product virion protein US10

123475 123532 122862 123572 CDS product virion protein US10  
CCTGCGCGCCGCGGCCGCAAGCTCCCTCTCCAGCTGCCCTCGGCCATCGGACCGCC

124381 124402 124376 125194 CDS product virion protein V67

124425 124474 124376 125194 CDS product virion protein V67  
GGCTGCGGGGCTGCCTGGCCCCTCTGGGGTGGGGGTCAGGGGAGCTCTGG

124618 124640 124376 125194 CDS product virion protein V67

124681 124697 124376 125194 CDS product virion protein V67

124719 124738 124376 125194 CDS product virion protein V67

121695-121717 5:02:01

121894-121925 6:03:01

122065-122078 4:01:01 GGACGTGGGGGAGG

122136-122171 8:05:02

122194-122212 4:01:01 CCGCAAGCGCCAACCCCCC

122912-122959 10:07:02

123049-123062 4:01:01 GGCGGAGGCAGCGG

123081-123105 5:02:01 CCGGGCCGCCCGCGGAGGCCTGGCC

123150-123170 4:01:01 CCAGCCCCATGCCCGTCTTCC

123214-123236 5:02:01 GGATCTCGGCGCGGCGCCGGTGG

123448-123466 5:02:01 CCCCCGCCACGCAGCCGCC

123475-123532 9:06:02

124381-124402 4:01:01 GGCCACGGGGGTGTCTTCGGGG

124425-124474 8:05:02

124618-124640 5:02:01 GGCGATGGCGGGGGGAACCTTGG

124681-124697 4:01:01 GGCATCGGCGGCGTCCG

124719-124738 4:01:01 CCGCGGGTTCTCCTCGCCC

|                                                                      |        |        |        |                                                 |               |          |                              |
|----------------------------------------------------------------------|--------|--------|--------|-------------------------------------------------|---------------|----------|------------------------------|
| 124754                                                               | 124781 | 124376 | 125194 | CDS product virion protein V67                  | 124754-124781 | 6:03:01  | GGGTAGAGGAACGGCAGGCGGACGAAGG |
| 124822                                                               | 124838 | 124376 | 125194 | CDS product virion protein V67                  | 124822-124838 | 4:01:01  | GGGCAGCGGCAGGGCGG            |
| 124851                                                               | 124876 | 124376 | 125194 | CDS product virion protein V67                  | 124851-124876 | 7:04:01  | CCTCTCCGGCCACCACCCCTCGACC    |
| 125050                                                               | 125093 | 124376 | 125194 | CDS product virion protein V67                  | 125050-125093 | 9:06:02  |                              |
| GGAGTTGGCGGCCCCCGGCCGCGGCTGCGGCGAAGGTGGGG                            |        |        |        |                                                 |               |          |                              |
| 125103                                                               | 125128 | 124376 | 125194 | CDS product virion protein V67                  | 125103-125128 | 6:03:01  | GGTGGGCGGGTTGGCATTGCGGCGG    |
| 125155                                                               | 125171 | 124376 | 125194 | CDS product virion protein V67                  | 125155-125171 | 5:02:01  | GGTGCCGGCGGTGGCGG            |
| 125260                                                               | 125290 | 125019 | 126275 | CDS product virion protein US2                  | 125260-125290 | 7:04:01  |                              |
| GGGCTAGGCGGTGGTGGGTGTAAAGGCGAGG                                      |        |        |        |                                                 |               |          |                              |
| 125430                                                               | 125505 | 125019 | 126275 | CDS product virion protein US2                  | 125430-125505 | 14:11:03 |                              |
| GGCGGGCGCGGGCGCCCGGGTCCCCGGGCGGGGCGGTCGCGCGCGGCCGTGGACCGAGCGGGCGCGGG |        |        |        |                                                 |               |          |                              |
| 125536                                                               | 125559 | 125019 | 126275 | CDS product virion protein US2                  | 125536-125559 | 7:04:01  | CCCCCCCCTCCGACGGCCGCCGCC     |
| 125562                                                               | 125584 | 125019 | 126275 | CDS product virion protein US2                  | 125562-125584 | 4:01:01  | GGCAGCGGCCGCCCGGGGCGGG       |
| 126483                                                               | 126511 | 126411 | 127559 | CDS product serine/threonine protein kinase US3 | 126483-126511 | 7:04:01  |                              |
| CCACGCCTCCGCTACCACCTCCCACACCC                                        |        |        |        |                                                 |               |          |                              |
| 126533                                                               | 126551 | 126411 | 127559 | CDS product serine/threonine protein kinase US3 | 126533-126551 | 4:01:01  |                              |
| GGTGCGGCCGCGGACGAGG                                                  |        |        |        |                                                 |               |          |                              |
| 126853                                                               | 126872 | 126411 | 127559 | CDS product serine/threonine protein kinase US3 | 126853-126872 | 4:01:01  |                              |
| GGACACCTTGGTATCGGGG                                                  |        |        |        |                                                 |               |          |                              |
| 127111                                                               | 127137 | 126411 | 127559 | CDS product serine/threonine protein kinase US3 | 127111-127137 | 5:02:01  |                              |
| GGAACCCGCGGACCTGGGCCTGGCTGG                                          |        |        |        |                                                 |               |          |                              |
| 127787                                                               | 127817 | 127681 | 128916 | CDS product envelope glycoprotein G             | 127787-127817 | 6:03:01  |                              |
| CCCACCAAACACCCAGCCCGAACGCCACCC                                       |        |        |        |                                                 |               |          |                              |

|                                                                                     |        |        |        |                                     |               |          |                         |
|-------------------------------------------------------------------------------------|--------|--------|--------|-------------------------------------|---------------|----------|-------------------------|
| 128281                                                                              | 128300 | 127681 | 128916 | CDS product envelope glycoprotein G | 128281-128300 | 4:01:01  | CCAGCCCACACCCGCGTGCC    |
| 128492                                                                              | 128506 | 127681 | 128916 | CDS product envelope glycoprotein G | 128492-128506 | 4:01:01  | GGTGGGTGCGGTTGG         |
| 129252                                                                              | 129272 | 129097 | 131490 | CDS product envelope glycoprotein J | 129252-129272 | 5:02:01  | CCCACCACGAGTCCACCTACC   |
| 129285                                                                              | 129313 | 129097 | 131490 | CDS product envelope glycoprotein J | 129285-129313 | 5:02:01  |                         |
| CCCCCACAATCAACCCACATCCTCCCC                                                         |        |        |        |                                     |               |          |                         |
| 129379                                                                              | 129404 | 129097 | 131490 | CDS product envelope glycoprotein J | 129379-129404 | 4:01:01  |                         |
| CCAGCACAACCTCTATTCCAACATCC                                                          |        |        |        |                                     |               |          |                         |
| 129418                                                                              | 129437 | 129097 | 131490 | CDS product envelope glycoprotein J | 129418-129437 | 4:01:01  | CCACCACAACAACCCCAACC    |
| 129466                                                                              | 129494 | 129097 | 131490 | CDS product envelope glycoprotein J | 129466-129494 | 4:01:01  |                         |
| CCGCGGCTCCCAACGCGCGCTACAACC                                                         |        |        |        |                                     |               |          |                         |
| 129607                                                                              | 129626 | 129097 | 131490 | CDS product envelope glycoprotein J | 129607-129626 | 4:01:01  | CCACCACTGTTCCAACAACC    |
| 129772                                                                              | 129869 | 129097 | 131490 | CDS product envelope glycoprotein J | 129772-129869 | 19:16:04 |                         |
| CCTCTGCAACCACCGCGGCTACCACCACCGCGGCTACCACCACCGCGGCTACCACCACCGCGGCTACCACCACCGCGGCTACC |        |        |        |                                     |               |          |                         |
| 129916                                                                              | 129959 | 129097 | 131490 | CDS product envelope glycoprotein J | 129916-129959 | 8:05:02  |                         |
| CCACGTCCACCCCTCAGTTCCACTGCCACATCTGCCACTCCC                                          |        |        |        |                                     |               |          |                         |
| 130312                                                                              | 130331 | 129097 | 131490 | CDS product envelope glycoprotein J | 130312-130331 | 4:01:01  | CCGACTCTTCCACCGTGCCC    |
| 130450                                                                              | 130486 | 129097 | 131490 | CDS product envelope glycoprotein J | 130450-130486 | 6:03:01  |                         |
| CCGGAAATACCACCCCATCACCTTCCCCGCGTACCCC                                               |        |        |        |                                     |               |          |                         |
| 130553                                                                              | 130565 | 129097 | 131490 | CDS product envelope glycoprotein J | 130553-130565 | 4:01:01  | CCACACCACCGCC           |
| 130596                                                                              | 130618 | 129097 | 131490 | CDS product envelope glycoprotein J | 130596-130618 | 4:01:01  | GGTCGCGCAGGGGGTCGTCGGGG |
| 130740                                                                              | 130763 | 129097 | 131490 | CDS product envelope glycoprotein J | 130740-130763 | 5:02:01  | CCTCAGTCCCGCCAGACCGACCC |
| 131053                                                                              | 131085 | 129097 | 131490 | CDS product envelope glycoprotein J | 131053-131085 | 6:03:01  |                         |
| CCACCAAATCAACCACAATACCGTGTCCGGGCC                                                   |        |        |        |                                     |               |          |                         |

|                                                                                                               |                                                |
|---------------------------------------------------------------------------------------------------------------|------------------------------------------------|
| 131689 131717 131583 132791 CDS product envelope glycoprotein D<br>GGTTCGAGGACGCCAGGATAGGCCAAAGG              | 131689-131717 5:02:01                          |
| 132413 132435 131583 132791 CDS product envelope glycoprotein D                                               | 132413-132435 5:02:01 CCCGTGCCTCCGATAACCACCC   |
| 132481 132519 131583 132791 CDS product envelope glycoprotein D<br>CCCGAAACCAGGCCAGGCGGACCCCAAACCAATCAGCC     | 132481-132519 6:03:01                          |
| 133413 133431 132899 134173 CDS product envelope glycoprotein I                                               | 133413-133431 4:01:01 CCCCATCCAATGCCCACC       |
| 133614 133630 132899 134173 CDS product envelope glycoprotein I                                               | 133614-133630 4:01:01 GGTTATTGGTCAGGAGG        |
| 133631 133655 132899 134173 CDS product envelope glycoprotein I<br>CCCTGTTATGCCATTGGTTCCAGCC                  | 133631-133655 4:01:01                          |
| 133975 134010 132899 134173 CDS product envelope glycoprotein I<br>GGACAGGGGGGCGCATCGGCGCCGAACGGAGACGG        | 133975-134010 7:04:01                          |
| 134074 134090 132899 134173 CDS product envelope glycoprotein I                                               | 134074-134090 5:02:01 CCTCCAACCCCAAACC         |
| 134783 134819 134406 136058 CDS product envelope glycoprotein E<br>CCAATCCTTGCCGAAACCCGCAGCGTCCTACAAATCC      | 134783-134819 6:03:01                          |
| 134915 134934 134406 136058 CDS product envelope glycoprotein E                                               | 134915-134934 4:01:01 CCGCCCAAACAACCGCAACC     |
| 134952 134993 134406 136058 CDS product envelope glycoprotein E<br>CCCCGCCACCCGTAACCGTTCCTCAGGTTCCCGTAAAGACCC | 134952-134993 7:04:01                          |
| 135181 135207 134406 136058 CDS product envelope glycoprotein E<br>CCCGACAGCCATGGCCTGCCTGCACCC                | 135181-135207 5:02:01                          |
| 135437 135454 134406 136058 CDS product envelope glycoprotein E                                               | 135437-135454 4:01:01 GGACATCCGGAGGCGTGG       |
| 135859 135899 134406 136058 CDS product envelope glycoprotein E<br>CCCACCACCTCCCAAACAGCTCCACAGCTCCCACCATACC   | 135859-135899 9:06:02                          |
| 135929 135952 134406 136058 CDS product envelope glycoprotein E                                               | 135929-135952 5:02:01 GGCAGGTCCGGATTCAAGGTTTGG |

|                                                           |        |        |        |                                   |
|-----------------------------------------------------------|--------|--------|--------|-----------------------------------|
| 136186                                                    | 136212 | 136055 | 136447 | CDS product membrane protein US8A |
| CCCAGATCCGGCTCAACCTCCGATTCC                               |        |        |        |                                   |
| 136784                                                    | 136797 | 136783 | 137442 | CDS product membrane protein US9  |
| 136942                                                    | 136955 | 136783 | 137442 | CDS product membrane protein US9  |
| 137066                                                    | 137083 | 136783 | 137442 | CDS product membrane protein US9  |
| 137324                                                    | 137352 | 136783 | 137442 | CDS product membrane protein US9  |
| GGCCCGCAGGCACAGGCGGCGCGGTGG                               |        |        |        |                                   |
| 137987                                                    | 138003 | 137966 | 138784 | CDS product virion protein V67    |
| 138030                                                    | 138055 | 137966 | 138784 | CDS product virion protein V67    |
| 138065                                                    | 138108 | 137966 | 138784 | CDS product virion protein V67    |
| CCCCACCTTCGCCGAGCCGCGCGGGGGGCGCCAACTCC                    |        |        |        |                                   |
| 138282                                                    | 138307 | 137966 | 138784 | CDS product virion protein V67    |
| 138320                                                    | 138336 | 137966 | 138784 | CDS product virion protein V67    |
| 138377                                                    | 138404 | 137966 | 138784 | CDS product virion protein V67    |
| 138420                                                    | 138439 | 137966 | 138784 | CDS product virion protein V67    |
| 138461                                                    | 138477 | 137966 | 138784 | CDS product virion protein V67    |
| 138518                                                    | 138540 | 137966 | 138784 | CDS product virion protein V67    |
| 138684                                                    | 138733 | 137966 | 138784 | CDS product virion protein V67    |
| CCAGAGCTCCCCTGACCCCCACCCAGAGGGGCCAGGCAGCCCCGCAGCC         |        |        |        |                                   |
| 138756                                                    | 138777 | 137966 | 138784 | CDS product virion protein V67    |
| 139626                                                    | 139683 | 139588 | 140298 | CDS product virion protein US10   |
| GGCGGTCCGATGGGCCGAGGGCAGCTGGAGAGGGAGCTTGCGCCGCGGGCGCGCAGG |        |        |        |                                   |
| 139692                                                    | 139710 | 139588 | 140298 | CDS product virion protein US10   |

|               |         |                            |
|---------------|---------|----------------------------|
| 136186-136212 | 5:02:01 |                            |
| 136784-136797 | 4:01:01 | GGAGAAGGCGGAGG             |
| 136942-136955 | 4:01:01 | CCGCTACCTCCACC             |
| 137066-137083 | 4:01:01 | CCCGTCTCCCCCATCACC         |
| 137324-137352 | 6:03:01 |                            |
| 137987-138003 | 5:02:01 | CCGCCACCGCCGGCACC          |
| 138030-138055 | 6:03:01 | CCGCCGCAATGCCAACCCGCCCCACC |
| 138065-138108 | 9:06:02 |                            |
| 138282-138307 | 7:04:01 | GGTCGAGGGGTGGTGGCCGAGAGG   |
| 138320-138336 | 4:01:01 | CCGCCCTGCCGCTGCCC          |
| 138377-138404 | 6:03:01 | CCTTCGTCCGCTGCCGTTCTCTACCC |
| 138420-138439 | 4:01:01 | GGGCGAGGAGGAACCCGCGG       |
| 138461-138477 | 4:01:01 | CCGACGCCGCCGATGCC          |
| 138518-138540 | 5:02:01 | CCAAGGTTCCCCCGCCATCGCC     |
| 138684-138733 | 8:05:02 |                            |
| 138756-138777 | 4:01:01 | CCCCGAAGACCCCCGTGGCC       |
| 139626-139683 | 9:06:02 |                            |
| 139692-139710 | 5:02:01 | GGCGGTGCGTGGCGGGG          |



|                                                 |        |        |        |                                            |
|-------------------------------------------------|--------|--------|--------|--------------------------------------------|
| 139922                                          | 139944 | 139588 | 140298 | CDS product virion protein US10            |
| 139988                                          | 140008 | 139588 | 140298 | CDS product virion protein US10            |
| 140053                                          | 140077 | 139588 | 140298 | CDS product virion protein US10            |
| 140096                                          | 140109 | 139588 | 140298 | CDS product virion protein US10            |
| 140199                                          | 140246 | 139588 | 140298 | CDS product virion protein US10            |
| CCCGTCCGCGCCCGCCCCGTCCCCGTCCCCGCTCCGGACTCCTCGCC |        |        |        |                                            |
| 140946                                          | 140964 | 140911 | 141792 | CDS product regulatory protein ICP22       |
| 140987                                          | 141022 | 140911 | 141792 | CDS product regulatory protein ICP22       |
| GGGTTGTAGGTTGGTGGTTGTTGGTGGGGGCATCGG            |        |        |        |                                            |
| 141080                                          | 141093 | 140911 | 141792 | CDS product regulatory protein ICP22       |
| 141233                                          | 141264 | 140911 | 141792 | CDS product regulatory protein ICP22       |
| GGGTATTCGGGGGTCGCTCGGCGGCTCCAGG                 |        |        |        |                                            |
| 141441                                          | 141463 | 140911 | 141792 | CDS product regulatory protein ICP22       |
| GGTCACGTGGATCGAGGAGGTGG                         |        |        |        |                                            |
| 141539                                          | 141555 | 140911 | 141792 | CDS product regulatory protein ICP22       |
| 141544                                          | 141587 | 140911 | 141792 | CDS product regulatory protein ICP22       |
| GGCCCCCGGGCCAGGTACGGGCGCAGGGCCGCGGGGATAGCGG     |        |        |        |                                            |
| 141592                                          | 141625 | 140911 | 141792 | CDS product regulatory protein ICP22       |
| CCGTATTCGGATGGTCCGAGCCCGGGGAGCC                 |        |        |        |                                            |
| 141656                                          | 141675 | 140911 | 141792 | CDS product regulatory protein ICP22       |
| 141685                                          | 141728 | 140911 | 141792 | CDS product regulatory protein ICP22       |
| GGGGCGAGGGGTGAGGGACGGGATGAGGGGGCTGGTGGACGG      |        |        |        |                                            |
| 144639                                          | 144666 | 144569 | 149032 | CDS product transcriptional regulator ICP4 |

|               |          |                          |
|---------------|----------|--------------------------|
| 139922-139944 | 5:02:01  | CCACCGGCGCCGCGCCGAGATCC  |
| 139988-140008 | 4:01:01  | GGAAGACGGGCATGGGGCTGG    |
| 140053-140077 | 5:02:01  | GGCCAGGCCTCCGCGGGCGCCCGG |
| 140096-140109 | 4:01:01  | CCGCTGCCTCCGCC           |
| 140199-140246 | 10:07:02 |                          |
|               |          |                          |
| 140946-140964 | 4:01:01  | GGGGGTTGGCGCTTGC GG      |
| 140987-141022 | 8:05:02  |                          |
|               |          |                          |
| 141080-141093 | 4:01:01  | CCTCCCCACGTCC            |
| 141233-141264 | 6:03:01  |                          |
|               |          |                          |
| 141441-141463 | 5:02:01  |                          |
|               |          |                          |
| 141539-141555 | 4:01:01  | CCCCTGGCCCCGGGCC         |
| 141544-141587 | 7:04:01  |                          |
|               |          |                          |
| 141592-141625 | 6:03:01  |                          |
|               |          |                          |
| 141656-141675 | 4:01:01  | GGCTGGAGCGTGGGGACGGG     |
| 141685-141728 | 11:08:02 |                          |
|               |          |                          |
| 144639-144666 | 5:02:01  |                          |

|                                                                        |               |         |  |  |  |  |
|------------------------------------------------------------------------|---------------|---------|--|--|--|--|
| CCCCCTCATCCGCGCAGCCAGCGCGGCC                                           |               |         |  |  |  |  |
| 144680 144700 144569 149032 CDS product transcriptional regulator ICP4 | 144680-144700 | 5:02:01 |  |  |  |  |
| CCCAGCCCCGCGCGCCCGACC                                                  |               |         |  |  |  |  |
| 144768 144796 144569 149032 CDS product transcriptional regulator ICP4 | 144768-144796 | 6:03:01 |  |  |  |  |
| CCCTCCGCGTCTCCGACTCCCGAGCCCC                                           |               |         |  |  |  |  |
| 144799 144816 144569 149032 CDS product transcriptional regulator ICP4 | 144799-144816 | 4:01:01 |  |  |  |  |
| GGAGGGAAGGCGAAGCGG                                                     |               |         |  |  |  |  |
| 144825 144842 144569 149032 CDS product transcriptional regulator ICP4 | 144825-144842 | 4:01:01 |  |  |  |  |
| GGCCGCCGGCAGCGGCGG                                                     |               |         |  |  |  |  |
| 144863 144899 144569 149032 CDS product transcriptional regulator ICP4 | 144863-144899 | 7:04:01 |  |  |  |  |
| CCGCCCAGCCGGCGTCCCCGGCACCCAGCCCGGCTCC                                  |               |         |  |  |  |  |
| 144927 144944 144569 149032 CDS product transcriptional regulator ICP4 | 144927-144944 | 4:01:01 |  |  |  |  |
| CCACTCCTCCGTGGCCCC                                                     |               |         |  |  |  |  |
| 144939 144968 144569 149032 CDS product transcriptional regulator ICP4 | 144939-144968 | 5:02:01 |  |  |  |  |
| GGCCCCGGGGAACGGTCGCCGGGCCACGGG                                         |               |         |  |  |  |  |
| 144957 144981 144569 149032 CDS product transcriptional regulator ICP4 | 144957-144981 | 4:01:01 |  |  |  |  |
| CCGGGCCACGGGCTCCTCATCACC                                               |               |         |  |  |  |  |
| 144982 145006 144569 149032 CDS product transcriptional regulator ICP4 | 144982-145006 | 5:02:01 |  |  |  |  |
| GGCGGTGGGGACGCGGCCGACCCGG                                              |               |         |  |  |  |  |
| 145025 145076 144569 149032 CDS product transcriptional regulator ICP4 | 145025-145076 | 9:06:02 |  |  |  |  |
| CCGAGACCTGCCCGGGTCCCCGAGCCCGAGTTTCCATCCTCGGCCTCCCC                     |               |         |  |  |  |  |
| 145068 145107 144569 149032 CDS product transcriptional regulator ICP4 | 145068-145107 | 7:04:01 |  |  |  |  |
| GGCCTCCCCGGGCGGAGGGTCCCCGGCACCCCGGTCCGG                                |               |         |  |  |  |  |

|                                                                                                                                |                                      |
|--------------------------------------------------------------------------------------------------------------------------------|--------------------------------------|
| 145149 145180 144569 149032 CDS product transcriptional regulator ICP4<br>GGACGAGGACGACCAGGCGGATGGTGCCGGGG                     | 145149-145180 6:03:01                |
| 145228 145240 144569 149032 CDS product transcriptional regulator ICP4                                                         | 145228-145240 4:01:01 GGCGGCGAGGAGG  |
| 145271 145314 144569 149032 CDS product transcriptional regulator ICP4<br>CCGCGAAAACCCCGTCGGCCGCCGGCTCTCCCGGGCCGTCCTCC         | 145271-145314 8:05:02                |
| 145315 145339 144569 149032 CDS product transcriptional regulator ICP4<br>GGAGGGGATCGCCCGGCCGCTGGGG                            | 145315-145339 4:01:01                |
| 145326 145349 144569 149032 CDS product transcriptional regulator ICP4<br>CCCGGCCGCTGGGGCCGCCACCCC                             | 145326-145349 5:02:01                |
| 145359 145400 144569 149032 CDS product transcriptional regulator ICP4<br>CCGCTCCGGCGCCGCTTCCCCGGCGCACCCGCTCCGGCTCC            | 145359-145400 8:05:02                |
| 145411 145427 144569 149032 CDS product transcriptional regulator ICP4<br>CCCCTCCAGCCGCC                                       | 145411-145427 4:01:01                |
| 145437 145448 144569 149032 CDS product transcriptional regulator ICP4                                                         | 145437-145448 4:01:01 CCTCTCCCTCC    |
| 145543 145586 144569 149032 CDS product transcriptional regulator ICP4<br>CCGCCGGCCGGAGCCCTACCGGCTCCCAAGGACCAGCGTCC            | 145543-145586 8:05:02                |
| 145625 145679 144569 149032 CDS product transcriptional regulator ICP4<br>CCAACCCAGACCCATACCCAGACCCAGACCCAGGACCGGCCGAGGAGGCCCC | 145625-145679 9:06:02                |
| 145659 145675 144569 149032 CDS product transcriptional regulator ICP4<br>GGCACCGGCCGAGGAGG                                    | 145659-145675 4:01:01                |
| 145722 145738 144569 149032 CDS product transcriptional regulator ICP4<br>GGCTACCGGGGCGGCGG                                    | 145722-145738 4:01:01                |
| 145752 145765 144569 149032 CDS product transcriptional regulator ICP4                                                         | 145752-145765 4:01:01 GGCCCCGGCGGCGG |

|                                                  |        |        |        |                                            |               |          |                |
|--------------------------------------------------|--------|--------|--------|--------------------------------------------|---------------|----------|----------------|
| 145808                                           | 145830 | 144569 | 149032 | CDS product transcriptional regulator ICP4 | 145808-145830 | 4:01:01  |                |
| CCCCGTCCGGGGACCCCTGGCCC                          |        |        |        |                                            |               |          |                |
| 145816                                           | 145837 | 144569 | 149032 | CDS product transcriptional regulator ICP4 | 145816-145837 | 4:01:01  |                |
| GGGGACCCCTGGCCCGGGTCGG                           |        |        |        |                                            |               |          |                |
| 145867                                           | 145900 | 144569 | 149032 | CDS product transcriptional regulator ICP4 | 145867-145900 | 6:03:01  |                |
| GGGGGGACCGGGGACTCGCGGGACGGGCTGTGGG               |        |        |        |                                            |               |          |                |
| 146153                                           | 146167 | 144569 | 149032 | CDS product transcriptional regulator ICP4 | 146153-146167 | 4:01:01  | CCAACCCCTGCCCC |
| 146173                                           | 146193 | 144569 | 149032 | CDS product transcriptional regulator ICP4 | 146173-146193 | 4:01:01  |                |
| GGGGACGCCATGGCGGCCGGG                            |        |        |        |                                            |               |          |                |
| 146222                                           | 146245 | 144569 | 149032 | CDS product transcriptional regulator ICP4 | 146222-146245 | 5:02:01  |                |
| CCGCCTCGGTGGCCATGAGCCGCC                         |        |        |        |                                            |               |          |                |
| 146274                                           | 146295 | 144569 | 149032 | CDS product transcriptional regulator ICP4 | 146274-146295 | 5:02:01  |                |
| CCTCCAGAGCCTCCGGCGCGCC                           |        |        |        |                                            |               |          |                |
| 146325                                           | 146338 | 144569 | 149032 | CDS product transcriptional regulator ICP4 | 146325-146338 | 4:01:01  | GGCGGGGAGGCCGG |
| 146348                                           | 146395 | 144569 | 149032 | CDS product transcriptional regulator ICP4 | 146348-146395 | 10:07:02 |                |
| CCGCCGTGGCCGGCTACCCGGCCCAGGCCGCCGCTGCCGCGGCCAGCC |        |        |        |                                            |               |          |                |
| 146355                                           | 146374 | 144569 | 149032 | CDS product transcriptional regulator ICP4 | 146355-146374 | 4:01:01  |                |
| GGCCGGCTACCCGGCCCAGG                             |        |        |        |                                            |               |          |                |
| 146404                                           | 146434 | 144569 | 149032 | CDS product transcriptional regulator ICP4 | 146404-146434 | 5:02:01  |                |
| CCCAGGCCCCGGCGCCCTCGGTCCGCGTCC                   |        |        |        |                                            |               |          |                |
| 146481                                           | 146523 | 144569 | 149032 | CDS product transcriptional regulator ICP4 | 146481-146523 | 6:03:01  |                |
| GGCTGCCGCGGCCGCGCCGCTCCGGGGACCAGGGCGCCCAGG       |        |        |        |                                            |               |          |                |
| 146486                                           | 146532 | 144569 | 149032 | CDS product transcriptional regulator ICP4 | 146486-146532 | 9:06:02  |                |

|                                                 |        |        |        |                                            |               |         |                 |
|-------------------------------------------------|--------|--------|--------|--------------------------------------------|---------------|---------|-----------------|
| CCGCGGCCGCGGCCGCTCCGGGGACCAGGGCGCCCAGGCCGTCCGCC |        |        |        |                                            |               |         |                 |
| 146591                                          | 146605 | 144569 | 149032 | CDS product transcriptional regulator ICP4 | 146591-146605 | 4:01:01 | CCCTCCTGCGCCTCC |
| 146649                                          | 146670 | 144569 | 149032 | CDS product transcriptional regulator ICP4 | 146649-146670 | 5:02:01 |                 |
| CCCCTCTCCCGCCTGCCCTCCC                          |        |        |        |                                            |               |         |                 |
| 146691                                          | 146710 | 144569 | 149032 | CDS product transcriptional regulator ICP4 | 146691-146710 | 5:02:01 |                 |
| GGCCGGGCTGGAGACGGCGG                            |        |        |        |                                            |               |         |                 |
| 146732                                          | 146764 | 144569 | 149032 | CDS product transcriptional regulator ICP4 | 146732-146764 | 5:02:01 |                 |
| GGGACCTGGTCGAGCGGGCCAGGCTCCTCGGGG               |        |        |        |                                            |               |         |                 |
| 146772                                          | 146793 | 144569 | 149032 | CDS product transcriptional regulator ICP4 | 146772-146793 | 5:02:01 |                 |
| CCCTACCCACCGCCTGGGCTCC                          |        |        |        |                                            |               |         |                 |
| 146826                                          | 146854 | 144569 | 149032 | CDS product transcriptional regulator ICP4 | 146826-146854 | 6:03:01 |                 |
| GGTGGTGGCCCGGACCGTGGCGCCGCTGG                   |        |        |        |                                            |               |         |                 |
| 146867                                          | 146913 | 144569 | 149032 | CDS product transcriptional regulator ICP4 | 146867-146913 | 8:05:02 |                 |
| CCGAGGGGGCCCGGGCCCGGGCCTCGGCCTGGACCGTCACCCAGGCC |        |        |        |                                            |               |         |                 |
| 146871                                          | 146898 | 144569 | 149032 | CDS product transcriptional regulator ICP4 | 146871-146898 | 6:03:01 |                 |
| GGGGGCCCCGGGCCCGGGCCTCGGCCTGG                   |        |        |        |                                            |               |         |                 |
| 146934                                          | 146956 | 144569 | 149032 | CDS product transcriptional regulator ICP4 | 146934-146956 | 6:03:01 |                 |
| GGTCGGGGGGATGTTGGGGGAGG                         |        |        |        |                                            |               |         |                 |
| 146957                                          | 146978 | 144569 | 149032 | CDS product transcriptional regulator ICP4 | 146957-146978 | 4:01:01 |                 |
| CCGTGTCCCTGCTGGCCCCACC                          |        |        |        |                                            |               |         |                 |
| 146987                                          | 147012 | 144569 | 149032 | CDS product transcriptional regulator ICP4 | 146987-147012 | 4:01:01 |                 |
| CCCAGCAGCCCTCATCGTCCTCGCCC                      |        |        |        |                                            |               |         |                 |
| 147022                                          | 147042 | 144569 | 149032 | CDS product transcriptional regulator ICP4 | 147022-147042 | 4:01:01 |                 |

|                                                           |        |        |        |                                            |               |          |                  |
|-----------------------------------------------------------|--------|--------|--------|--------------------------------------------|---------------|----------|------------------|
| CCCTTCTCCGGCTCCGCGGCC                                     |        |        |        |                                            |               |          |                  |
| 147031                                                    | 147051 | 144569 | 149032 | CDS product transcriptional regulator ICP4 | 147031-147051 | 4:01:01  |                  |
| GGCTCCGCGGCCGCGGAGGGG                                     |        |        |        |                                            |               |          |                  |
| 147054                                                    | 147090 | 144569 | 149032 | CDS product transcriptional regulator ICP4 | 147054-147090 | 7:04:01  |                  |
| CCTTCAGACCCTGCCGCCCCTGTGGCCCACCGTCCCC                     |        |        |        |                                            |               |          |                  |
| 147111                                                    | 147145 | 144569 | 149032 | CDS product transcriptional regulator ICP4 | 147111-147145 | 6:03:01  |                  |
| CCCCTCGTCCCACTCCCAGTCCCCCAGCACTCCC                        |        |        |        |                                            |               |          |                  |
| 147151                                                    | 147166 | 144569 | 149032 | CDS product transcriptional regulator ICP4 | 147151-147166 | 4:01:01  | GGCGGAGGCGCCGGGG |
| 147173                                                    | 147196 | 144569 | 149032 | CDS product transcriptional regulator ICP4 | 147173-147196 | 6:03:01  |                  |
| CCGCCACCTGCTGCCGGGCCACCC                                  |        |        |        |                                            |               |          |                  |
| 147260                                                    | 147283 | 144569 | 149032 | CDS product transcriptional regulator ICP4 | 147260-147283 | 6:03:01  |                  |
| CCGCCTCCCCGGCCACCTCAGCC                                   |        |        |        |                                            |               |          |                  |
| 147315                                                    | 147336 | 144569 | 149032 | CDS product transcriptional regulator ICP4 | 147315-147336 | 4:01:01  |                  |
| CCGTGCCATCCACGGGCGCCCC                                    |        |        |        |                                            |               |          |                  |
| 147328                                                    | 147357 | 144569 | 149032 | CDS product transcriptional regulator ICP4 | 147328-147357 | 4:01:01  |                  |
| GGGCGCCCCAGGGCAAGAGCGGCAAGCGG                             |        |        |        |                                            |               |          |                  |
| 147362                                                    | 147421 | 144569 | 149032 | CDS product transcriptional regulator ICP4 | 147362-147421 | 11:08:02 |                  |
| CCGAGCCCCTGGAGCCGGCGGCCAGGCCGAGCCTCGGCCTCCTTCTCCTCGTCCGCC |        |        |        |                                            |               |          |                  |
| 147372                                                    | 147400 | 144569 | 149032 | CDS product transcriptional regulator ICP4 | 147372-147400 | 6:03:01  |                  |
| GGAGCCGGCGGCCAGGCCGAGCCTCGG                               |        |        |        |                                            |               |          |                  |
| 147453                                                    | 147465 | 144569 | 149032 | CDS product transcriptional regulator ICP4 | 147453-147465 | 4:01:01  | CCCTCCGGCCCCC    |
| 147473                                                    | 147512 | 144569 | 149032 | CDS product transcriptional regulator ICP4 | 147473-147512 | 6:03:01  |                  |
| GGGTGGCCACCCGGGCCACCAGGCTCCCCGGGCCCTGGG                   |        |        |        |                                            |               |          |                  |

|                                                              |        |        |        |                                            |               |          |                   |
|--------------------------------------------------------------|--------|--------|--------|--------------------------------------------|---------------|----------|-------------------|
| 147479                                                       | 147538 | 144569 | 149032 | CDS product transcriptional regulator ICP4 | 147479-147538 | 11:08:02 |                   |
| CCACCCCGGGCCACCAGGCTCCCCGGGCCCTGGGACCCATGCCAGCCGAGGGCCCCGACC |        |        |        |                                            |               |          |                   |
| 147651                                                       | 147677 | 144569 | 149032 | CDS product transcriptional regulator ICP4 | 147651-147677 | 4:01:01  |                   |
| CCAGCTGTTCCCGAGGCCTGGCGCCC                                   |        |        |        |                                            |               |          |                   |
| 147686                                                       | 147721 | 144569 | 149032 | CDS product transcriptional regulator ICP4 | 147686-147721 | 6:03:01  |                   |
| CCTTCGATCCCCAGGCCCTGGCCACCATCGCGGCC                          |        |        |        |                                            |               |          |                   |
| 147730                                                       | 147749 | 144569 | 149032 | CDS product transcriptional regulator ICP4 | 147730-147749 | 4:01:01  |                   |
| GGCCCCCGGCCCGGGACGG                                          |        |        |        |                                            |               |          |                   |
| 147760                                                       | 147779 | 144569 | 149032 | CDS product transcriptional regulator ICP4 | 147760-147779 | 4:01:01  |                   |
| GGGGAGCTGGCGGCCAGCGG                                         |        |        |        |                                            |               |          |                   |
| 147828                                                       | 147844 | 144569 | 149032 | CDS product transcriptional regulator ICP4 | 147828-147844 | 4:01:01  |                   |
| GGACGTGAAGGTGGTGG                                            |        |        |        |                                            |               |          |                   |
| 147864                                                       | 147892 | 144569 | 149032 | CDS product transcriptional regulator ICP4 | 147864-147892 | 5:02:01  |                   |
| GGACGAGGACCTGCTGGGCGGACTCCCGG                                |        |        |        |                                            |               |          |                   |
| 147888                                                       | 147903 | 144569 | 149032 | CDS product transcriptional regulator ICP4 | 147888-147903 | 4:01:01  | CCCGGCCCTCCCGCCCC |
| 147942                                                       | 147975 | 144569 | 149032 | CDS product transcriptional regulator ICP4 | 147942-147975 | 6:03:01  |                   |
| GGGGGACTCTCGGCGCTGCTGGCGGCCCTGGGG                            |        |        |        |                                            |               |          |                   |
| 147968                                                       | 148011 | 144569 | 149032 | CDS product transcriptional regulator ICP4 | 147968-148011 | 7:04:01  |                   |
| CCCTGGGGAACCGCATCCTCACCAAGCGGTCCCACGCCTGGGCC                 |        |        |        |                                            |               |          |                   |
| 148007                                                       | 148042 | 144569 | 149032 | CDS product transcriptional regulator ICP4 | 148007-148042 | 6:03:01  |                   |
| GGGCCGCAACTGGACCGGGGCCCCGGACGTCTCGG                          |        |        |        |                                            |               |          |                   |
| 148076                                                       | 148095 | 144569 | 149032 | CDS product transcriptional regulator ICP4 | 148076-148095 | 4:01:01  |                   |
| CCGGGGACCTGGCCTTCACC                                         |        |        |        |                                            |               |          |                   |

|        |        |        |        |                                                                                            |               |         |
|--------|--------|--------|--------|--------------------------------------------------------------------------------------------|---------------|---------|
| 148110 | 148134 | 144569 | 149032 | CDS product transcriptional regulator ICP4<br>CCTCTGCCCTGCGCCTGGGCTCCGCC                   | 148110-148134 | 5:02:01 |
| 148173 | 148190 | 144569 | 149032 | CDS product transcriptional regulator ICP4<br>GGATTGGCCCCAGGACGG                           | 148173-148190 | 4:01:01 |
| 148264 | 148309 | 144569 | 149032 | CDS product transcriptional regulator ICP4<br>CCCCGGGAGCGCCACCTCAGCCGCGGTCCTCACCTCCAGCACCC | 148264-148309 | 8:05:02 |
| 148389 | 148407 | 144569 | 149032 | CDS product transcriptional regulator ICP4<br>CCGCTCCTCCAACGTGGCC                          | 148389-148407 | 4:01:01 |
| 148467 | 148485 | 144569 | 149032 | CDS product transcriptional regulator ICP4<br>CCGCCAGCGCGTCCTGCCC                          | 148467-148485 | 4:01:01 |
| 148495 | 148533 | 144569 | 149032 | CDS product transcriptional regulator ICP4<br>GGCTGCAAGGACATGCGGGCCAGGCCGAGGGCCTCGGG       | 148495-148533 | 6:03:01 |
| 148514 | 148544 | 144569 | 149032 | CDS product transcriptional regulator ICP4<br>CCCAGGCCGAGGGCCTCGGGTTCCACGACCC              | 148514-148544 | 5:02:01 |
| 148572 | 148588 | 144569 | 149032 | CDS product transcriptional regulator ICP4<br>CCACCGCGGGCCAACC                             | 148572-148588 | 4:01:01 |
| 148614 | 148636 | 144569 | 149032 | CDS product transcriptional regulator ICP4<br>CCCCGTGTACCTCGCCTGCGGCC                      | 148614-148636 | 4:01:01 |
| 148633 | 148666 | 144569 | 149032 | CDS product transcriptional regulator ICP4<br>GGCCGGCGCGGCGCTGGGGCCGTGGAGCCCTCGG           | 148633-148666 | 6:03:01 |
| 148720 | 148741 | 144569 | 149032 | CDS product transcriptional regulator ICP4<br>CCCAGCGCCGAGGCCGAGCCCC                       | 148720-148741 | 4:01:01 |
| 148750 | 148781 | 144569 | 149032 | CDS product transcriptional regulator ICP4                                                 | 148750-148781 | 6:03:01 |



|                                                                  |        |        |        |                                                  |               |         |
|------------------------------------------------------------------|--------|--------|--------|--------------------------------------------------|---------------|---------|
| CCCATCACCGAGGCTCCCCGCCGCCGAGCCCC                                 |        |        |        |                                                  |               |         |
| 148784                                                           | 148808 | 144569 | 149032 | CDS product transcriptional regulator ICP4       | 148784-148808 | 4:01:01 |
| GGGTGCGACTGGGAGCCCCGGTTTCGG                                      |        |        |        |                                                  |               |         |
| 148888                                                           | 148912 | 144569 | 149032 | CDS product transcriptional regulator ICP4       | 148888-148912 | 5:02:01 |
| GGGGCCGGCGATGTGGAGCTGGTGG                                        |        |        |        |                                                  |               |         |
| 148920                                                           | 148965 | 144569 | 149032 | CDS product transcriptional regulator ICP4       | 148920-148965 | 8:05:02 |
| CCCCGGCCCCGAGCCCCGGCGTGGCCCAGGCCCTCCGCCGCGCTCCC                  |        |        |        |                                                  |               |         |
| 148977                                                           | 149010 | 144569 | 149032 | CDS product transcriptional regulator ICP4       | 148977-149010 | 7:04:01 |
| GGTGGTGTGCGACGACGAGGACGGAGGAGACTGG                               |        |        |        |                                                  |               |         |
| gi 9629732 ref NC_001844.1  Equid herpesvirus 4, complete genome |        |        |        |                                                  |               |         |
| 2928                                                             | 2954   | 2457   | 3227   | CDS product myristylated tegument protein CIRC   | 2928-2954     | 6:03:01 |
| CCACCAACCACGCTTCCACCGAAAACC                                      |        |        |        |                                                  |               |         |
| 3145                                                             | 3174   | 2457   | 3227   | CDS product myristylated tegument protein CIRC   | 3145-3174     | 5:02:01 |
| CCCACCCAGCGAGCCAAACTGCCTTACACC                                   |        |        |        |                                                  |               |         |
| 3672                                                             | 3688   | 3262   | 3864   | CDS product nuclear protein UL55                 | 3672-3688     | 5:02:01 |
| 4268                                                             | 4303   | 4081   | 5484   | CDS product multifunctional expression regulator | 4268-4303     | 6:03:01 |
| CCGGAGACACCGCTCGGCGCCACTCCCAACGGCCC                              |        |        |        |                                                  |               |         |
| 4589                                                             | 4620   | 4081   | 5484   | CDS product multifunctional expression regulator | 4589-4620     | 5:02:01 |
| CCAAGTCCCGTAGGGACCGCGCCGCTTCTGCC                                 |        |        |        |                                                  |               |         |
| 4863                                                             | 4879   | 4081   | 5484   | CDS product multifunctional expression regulator | 4863-4879     | 4:01:01 |
| GGCGTTGGCGGCTGCGG                                                |        |        |        |                                                  |               |         |
| 4992                                                             | 5009   | 4081   | 5484   | CDS product multifunctional expression regulator | 4992-5009     | 4:01:01 |

|                                          |       |       |       |                                                   |             |         |                      |
|------------------------------------------|-------|-------|-------|---------------------------------------------------|-------------|---------|----------------------|
| CCACCCGCCAGACGGTCC                       |       |       |       |                                                   |             |         |                      |
| 5785                                     | 5797  | 5618  | 6649  | CDS product envelope glycoprotein K               | 5785-5797   | 4:01:01 | GGGGGCTGGGGG         |
| 5902                                     | 5936  | 5618  | 6649  | CDS product envelope glycoprotein K               | 5902-5936   | 5:02:01 |                      |
| GGGGTATAGCTGGGAGCAGGGAGTATGGACTAAGG      |       |       |       |                                                   |             |         |                      |
| 7276                                     | 7302  | 6658  | 9900  | CDS product helicase-primase primase subunit      | 7276-7302   | 5:02:01 |                      |
| CCGCCATAAACCTCCCCAGAGTCGCCC              |       |       |       |                                                   |             |         |                      |
| 7457                                     | 7470  | 6658  | 9900  | CDS product helicase-primase primase subunit      | 7457-7470   | 4:01:01 | CCTCCGGTCCCGCC       |
| 7480                                     | 7493  | 6658  | 9900  | CDS product helicase-primase primase subunit      | 7480-7493   | 4:01:01 | GGTGGTGGTACCGG       |
| 8437                                     | 8458  | 6658  | 9900  | CDS product helicase-primase primase subunit      | 8437-8458   | 4:01:01 |                      |
| GGTTTGGTAGATGGAATTAAGG                   |       |       |       |                                                   |             |         |                      |
| 8466                                     | 8481  | 6658  | 9900  | CDS product helicase-primase primase subunit      | 8466-8481   | 4:01:01 | CCAGCCATGTCCAGCC     |
| 9096                                     | 9115  | 6658  | 9900  | CDS product helicase-primase primase subunit      | 9096-9115   | 4:01:01 |                      |
| GGTGGCTTGTAGGTCGTAGG                     |       |       |       |                                                   |             |         |                      |
| 9987                                     | 10018 | 9899  | 10633 | CDS product tegument protein UL51                 | 9987-10018  | 7:04:01 |                      |
| CCCAGCCACCATGCTCCGCCTACAGTCCGCCC         |       |       |       |                                                   |             |         |                      |
| 10728                                    | 10748 | 10722 | 11702 | CDS product deoxyuridine triphosphatase           | 10728-10748 | 4:01:01 | CCTGTTGAACCAAAGCCCCC |
| 10835                                    | 10860 | 10722 | 11702 | CDS product deoxyuridine triphosphatase           | 10835-10860 | 6:03:01 |                      |
| GGTGGCGAATAGGTAGGAAAGGGGG                |       |       |       |                                                   |             |         |                      |
| 11912                                    | 11931 | 11671 | 11973 | CDS product envelope glycoprotein N               | 11912-11931 | 4:01:01 | CCAGGCATACCGCGCCTTCC |
| 12464                                    | 12506 | 12128 | 13042 | CDS product tegument protein VP22                 | 12464-12506 | 7:04:01 |                      |
| CCTCCCATGGCCGTTTGAGCCCCACAAAACACACCCACCC |       |       |       |                                                   |             |         |                      |
| 12671                                    | 12692 | 12128 | 13042 | CDS product tegument protein VP22                 | 12671-12692 | 4:01:01 | CCCCAAAACGCCAAGACGCC |
| 13543                                    | 13558 | 13173 | 14519 | CDS product transactivating tegument protein VP16 | 13543-13558 | 4:01:01 |                      |

|                                                   |       |       |       |                                                   |             |                                 |
|---------------------------------------------------|-------|-------|-------|---------------------------------------------------|-------------|---------------------------------|
| CCTGCCCATACCCACC                                  |       |       |       |                                                   |             |                                 |
| 14338                                             | 14389 | 13173 | 14519 | CDS product transactivating tegument protein VP16 |             | 14338-14389 10:07:02            |
| CCCACCATCCCCAGCGCCGTTTACCAGGGGATCCAGTTCACCGCTTACC |       |       |       |                                                   |             |                                 |
| 15166                                             | 15187 | 14890 | 17484 | CDS product tegument protein VP13/14              | 15166-15187 | 4:01:01 CCCCCGCGCAGCCACAAGCACC  |
| 15800                                             | 15820 | 14890 | 17484 | CDS product tegument protein VP13/14              | 15800-15820 | 4:01:01 CCACCCGGTTGCCATGAACCC   |
| 16400                                             | 16414 | 14890 | 17484 | CDS product tegument protein VP13/14              | 16400-16414 | 4:01:01 CCAACCGCTTCCCCC         |
| 16649                                             | 16662 | 14890 | 17484 | CDS product tegument protein VP13/14              | 16649-16662 | 4:01:01 GGTGGCAATGGAGG          |
| 16961                                             | 16972 | 14890 | 17484 | CDS product tegument protein VP13/14              | 16961-16972 | 4:01:01 GGTGGATGGGGG            |
| 17226                                             | 17242 | 14890 | 17484 | CDS product tegument protein VP13/14              | 17226-17242 | 4:01:01 CCACGCCCTGGACCCCC       |
| 17328                                             | 17358 | 14890 | 17484 | CDS product tegument protein VP13/14              | 17328-17358 | 6:03:01                         |
| GGCGCCGTTTGGGGCGCATGGTGGACATGG                    |       |       |       |                                                   |             |                                 |
| 17651                                             | 17677 | 17633 | 19864 | CDS product tegument protein VP11/12              | 17651-17677 | 4:01:01                         |
| CCTCATGGGCCCGCGTTTCCAAAAACC                       |       |       |       |                                                   |             |                                 |
| 18290                                             | 18310 | 17633 | 19864 | CDS product tegument protein VP11/12              | 18290-18310 | 4:01:01 GGTGGCTATTGTGGTTTATGG   |
| 18647                                             | 18664 | 17633 | 19864 | CDS product tegument protein VP11/12              | 18647-18664 | 5:02:01 GGTGGACGGCGGCGTGG       |
| 18755                                             | 18786 | 17633 | 19864 | CDS product tegument protein VP11/12              | 18755-18786 | 5:02:01                         |
| GGGCAAACATGGAAAAGGGAACGGTTATGTGG                  |       |       |       |                                                   |             |                                 |
| 18945                                             | 18974 | 17633 | 19864 | CDS product tegument protein VP11/12              | 18945-18974 | 6:03:01                         |
| CCCGCCCCAGGGACCTCTTCTGCGCCACC                     |       |       |       |                                                   |             |                                 |
| 19268                                             | 19287 | 17633 | 19864 | CDS product tegument protein VP11/12              | 19268-19287 | 5:02:01 CCTCCACGCCTTCGCCAACC    |
| 19422                                             | 19444 | 17633 | 19864 | CDS product tegument protein VP11/12              | 19422-19444 | 4:01:01 GGAGGAAATTTGGCAATTGCGGG |
| 20087                                             | 20105 | 20018 | 20698 | CDS product membrane protein UL45                 | 20087-20105 | 4:01:01 GGGCTGAGTGGGCGGGCGG     |
| 20554                                             | 20583 | 20018 | 20698 | CDS product membrane protein UL45                 | 20554-20583 | 6:03:01                         |

|                                |       |       |       |                                                 |             |                                    |
|--------------------------------|-------|-------|-------|-------------------------------------------------|-------------|------------------------------------|
| GGTTGGTTGGGGTAGAGTCGGCAGCGGTGG |       |       |       |                                                 |             |                                    |
| 21447                          | 21459 | 20939 | 22396 | CDS product envelope glycoprotein C             | 21447-21459 | 4:01:01 GGAGGCTGGGGGG              |
| 21662                          | 21687 | 20939 | 22396 | CDS product envelope glycoprotein C             | 21662-21687 | 4:01:01 GGGTGAACGGAGAGGTCCATTAGGGG |
| 22282                          | 22301 | 20939 | 22396 | CDS product envelope glycoprotein C             | 22282-22301 | 5:02:01 GGTTGGTGTGGCTGGACTGG       |
| 22648                          | 22668 | 22575 | 23786 | CDS product envelope protein UL43               | 22648-22668 | 4:01:01 GGGTTGCGGCCAAACGGCTGG      |
| 24016                          | 24041 | 24002 | 25222 | CDS product DNA polymerase processivity subunit | 24016-24041 | 4:01:01                            |
| GGGAGCTTCGGGACAGGGAATTTTGG     |       |       |       |                                                 |             |                                    |
| 24522                          | 24537 | 24002 | 25222 | CDS product DNA polymerase processivity subunit | 24522-24537 | 4:01:01 CCACCTGCCTATCTCC           |
| 24853                          | 24874 | 24002 | 25222 | CDS product DNA polymerase processivity subunit | 24853-24874 | 5:02:01                            |
| GGTTGGCTGGGCCTTGGTCCGG         |       |       |       |                                                 |             |                                    |
| 24882                          | 24904 | 24002 | 25222 | CDS product DNA polymerase processivity subunit | 24882-24904 | 4:01:01                            |
| CCAATAAACCCCTGCGTCCGTCC        |       |       |       |                                                 |             |                                    |
| 26009                          | 26033 | 25765 | 27255 | CDS product tegument host shutoff protein       | 26009-26033 | 4:01:01                            |
| GGACAGAGGTATATACGGTGATGGG      |       |       |       |                                                 |             |                                    |
| 26164                          | 26185 | 25765 | 27255 | CDS product tegument host shutoff protein       | 26164-26185 | 5:02:01                            |
| CCAACGGTTCCACCACCCAGCC         |       |       |       |                                                 |             |                                    |
| 26469                          | 26487 | 25765 | 27255 | CDS product tegument host shutoff protein       | 26469-26487 | 4:01:01 CCATTGTTTCCCCCTACCC        |
| 27173                          | 27188 | 25765 | 27255 | CDS product tegument host shutoff protein       | 27173-27188 | 4:01:01 CCACATTCCCACCCCC           |
| 27447                          | 27471 | 27362 | 28324 | CDS product ribonucleotide reductase subunit 2  | 27447-27471 | 6:03:01                            |
| GGGGGAAGCTTGGTGGGGTTTGGG       |       |       |       |                                                 |             |                                    |
| 27494                          | 27517 | 27362 | 28324 | CDS product ribonucleotide reductase subunit 2  | 27494-27517 | 5:02:01                            |
| CCAATTTCCCCAAAAGCCTGTCC        |       |       |       |                                                 |             |                                    |
| 27561                          | 27584 | 27362 | 28324 | CDS product ribonucleotide reductase subunit 2  | 27561-27584 | 5:02:01                            |

|                                  |       |       |       |                                                |                                                |
|----------------------------------|-------|-------|-------|------------------------------------------------|------------------------------------------------|
| GGTGGGTGCTTTTGGGGGCATGGG         |       |       |       |                                                |                                                |
| 29166                            | 29191 | 28363 | 30732 | CDS product ribonucleotide reductase subunit 1 | 29166-29191 4:01:01                            |
| CCCCTGAATTCCAAGTCCCAGCGACC       |       |       |       |                                                |                                                |
| 29329                            | 29341 | 28363 | 30732 | CDS product ribonucleotide reductase subunit 1 | 29329-29341 4:01:01 GGAGGTGGAAGGG              |
| 29574                            | 29592 | 28363 | 30732 | CDS product ribonucleotide reductase subunit 1 | 29574-29592 4:01:01                            |
| CCCAAATCCACACCGCTCC              |       |       |       |                                                |                                                |
| 29677                            | 29698 | 28363 | 30732 | CDS product ribonucleotide reductase subunit 1 | 29677-29698 4:01:01                            |
| CCGCTTCTCCATCCACGTACC            |       |       |       |                                                |                                                |
| 29998                            | 30018 | 28363 | 30732 | CDS product ribonucleotide reductase subunit 1 | 29998-30018 4:01:01                            |
| CCAACCTCTTCCATAAGAGCC            |       |       |       |                                                |                                                |
| 30171                            | 30192 | 28363 | 30732 | CDS product ribonucleotide reductase subunit 1 | 30171-30192 5:02:01                            |
| CCAGCCAACCTCACCGTAACC            |       |       |       |                                                |                                                |
| 31058                            | 31084 | 30967 | 32355 | CDS product capsid triplex subunit 1           | 31058-31084 5:02:01                            |
| GGCGAATGGTTCTGGGGGAGTCCGAGG      |       |       |       |                                                |                                                |
| 31203                            | 31234 | 30967 | 32355 | CDS product capsid triplex subunit 1           | 31203-31234 6:03:01                            |
| GGGTGGGCATCTAGGCTCGCACGGCCGGTTGG |       |       |       |                                                |                                                |
| 31264                            | 31294 | 30967 | 32355 | CDS product capsid triplex subunit 1           | 31264-31294 5:02:01                            |
| GGGTGTGGATCTGGTGCGTCGGCTCCCTCGG  |       |       |       |                                                |                                                |
| 31944                            | 31965 | 30967 | 32355 | CDS product capsid triplex subunit 1           | 31944-31965 4:01:01 GGCATCAAGGTGGTTTCGTAGG     |
| 32860                            | 32882 | 32712 | 35777 | CDS product tegument protein UL37              | 32860-32882 4:01:01 GGTATCTGTGGAAGAGGCAGCGG    |
| 33003                            | 33029 | 32712 | 35777 | CDS product tegument protein UL37              | 33003-33029 4:01:01 GGACCGACCGGAAACGGAAGCCGTGG |
| 33625                            | 33641 | 32712 | 35777 | CDS product tegument protein UL37              | 33625-33641 4:01:01 GGCGGGAATGGTAGCGG          |
| 34127                            | 34148 | 32712 | 35777 | CDS product tegument protein UL37              | 34127-34148 4:01:01 GGTTTGGCAGACAAGGGCGTGG     |

34799 34828 32712 35777 CDS product tegument protein UL37  
 CCTTTACCGGAACGGCCAACCGTTAGAACC  
 35150 35174 32712 35777 CDS product tegument protein UL37  
 35311 35331 32712 35777 CDS product tegument protein UL37  
 36019 36047 36006 46610 CDS product large tegument protein  
 CCCACCTGTTCCAACGGCCGGTGGGGCCC  
 36034 36069 36006 46610 CDS product large tegument protein  
 GGCCGGTGGGGCCCAGGCTGATGTGGTGGTTATAGG  
 36974 36994 36006 46610 CDS product large tegument protein  
 37116 37140 36006 46610 CDS product large tegument protein  
 37260 37281 36006 46610 CDS product large tegument protein  
 37318 37343 36006 46610 CDS product large tegument protein  
 37483 37503 36006 46610 CDS product large tegument protein  
 37571 37585 36006 46610 CDS product large tegument protein  
 38104 38123 36006 46610 CDS product large tegument protein  
 38899 38930 36006 46610 CDS product large tegument protein  
 GGCTCCTGGAGCGTTGGAACAGCTGGCGAAGG  
 39082 39098 36006 46610 CDS product large tegument protein  
 40299 40313 36006 46610 CDS product large tegument protein  
 40759 40780 36006 46610 CDS product large tegument protein  
 40933 40956 36006 46610 CDS product large tegument protein  
 41376 41416 36006 46610 CDS product large tegument protein  
 CCGGAATAGCCGCTGCCGGTAGCCGCCCCACCTGGAAGCC

34799-34828 5:02:01  
 35150-35174 4:01:01 GGAGACATGGCACTGGCCACAGAGG  
 35311-35331 4:01:01 GGGGGGCTCCGAGGCACCCGG  
 36019-36047 5:02:01  
 36034-36069 7:04:01  
 36974-36994 5:02:01 CCCCCGTGGACTCCCCCACC  
 37116-37140 5:02:01 GGGCCGAGGTATTGGATGATGGGGG  
 37260-37281 4:01:01 GGAGGATTTTCAGGATTTCTGG  
 37318-37343 5:02:01 GGGGGTCCTAGGCGTGGAGATAGAGG  
 37483-37503 4:01:01 GGCGTTTTTGGTGAAAAATGG  
 37571-37585 4:01:01 CCAGACCAATCCGCC  
 38104-38123 4:01:01 CCTTGCCTCAGTCCCTAACC  
 38899-38930 5:02:01  
 39082-39098 4:01:01 GGCTGGCGTAGGACCGG  
 40299-40313 4:01:01 GGGCTTTGGAGGAGG  
 40759-40780 4:01:01 GGACGTTAAGCCGTGGAGTGG  
 40933-40956 4:01:01 GGTTAGCTGGGATGAGGCATGGGG  
 41376-41416 8:05:02

[illegible]

|                                                            |       |       |       |                                                 |                      |                         |
|------------------------------------------------------------|-------|-------|-------|-------------------------------------------------|----------------------|-------------------------|
| 48691                                                      | 48713 | 48515 | 50365 | CDS product DNA packaging protein UL32          | 48691-48713 4:01:01  | CCCACGCCCAAACCTCAACACCC |
| 49099                                                      | 49117 | 48515 | 50365 | CDS product DNA packaging protein UL32          | 49099-49117 4:01:01  | GGAGTTGGATCTGGGACGG     |
| 49131                                                      | 49156 | 48515 | 50365 | CDS product DNA packaging protein UL32          | 49131-49156 4:01:01  |                         |
| GGCGTTAACGGGCGCTGGTATGATGG                                 |       |       |       |                                                 |                      |                         |
| 49993                                                      | 50014 | 48515 | 50365 | CDS product DNA packaging protein UL32          | 49993-50014 4:01:01  | GGAGACGCGGGTAGGTTTATGG  |
| 50119                                                      | 50141 | 48515 | 50365 | CDS product DNA packaging protein UL32          | 50119-50141 4:01:01  | CCACTGGGCGCTCCCCAGGAACC |
| 51950                                                      | 51960 | 51262 | 54924 | CDS product DNA polymerase catalytic subunit    | 51950-51960 4:01:01  | CCTCCGCCGCC             |
| 52441                                                      | 52463 | 51262 | 54924 | CDS product DNA polymerase catalytic subunit    | 52441-52463 4:01:01  |                         |
| CCGTTTGCCACACCGGTGAATCC                                    |       |       |       |                                                 |                      |                         |
| 52817                                                      | 52875 | 51262 | 54924 | CDS product DNA polymerase catalytic subunit    | 52817-52875 10:07:02 |                         |
| CCTTTGCTCCTTGGTATCCCACAATCCTACCTGTGCCGGGTTTTCCGCCCCCTGTTTC |       |       |       |                                                 |                      |                         |
| 53970                                                      | 53988 | 51262 | 54924 | CDS product DNA polymerase catalytic subunit    | 53970-53988 5:02:01  |                         |
| GGTTCCGGGCCGGAGGCGG                                        |       |       |       |                                                 |                      |                         |
| 54217                                                      | 54245 | 51262 | 54924 | CDS product DNA polymerase catalytic subunit    | 54217-54245 7:04:01  |                         |
| CCTCCCCACCAGCCGCCGTGTTTCCACC                               |       |       |       |                                                 |                      |                         |
| 54589                                                      | 54623 | 51262 | 54924 | CDS product DNA polymerase catalytic subunit    | 54589-54623 6:03:01  |                         |
| CCGTTCCAAACCCGAATCCTGCGAGGCCAGCAACC                        |       |       |       |                                                 |                      |                         |
| 55390                                                      | 55407 | 55178 | 58804 | CDS product single-stranded DNA-binding protein | 55390-55407 4:01:01  |                         |
| GGCCTTGCGGCGCTGGG                                          |       |       |       |                                                 |                      |                         |
| 55521                                                      | 55538 | 55178 | 58804 | CDS product single-stranded DNA-binding protein | 55521-55538 4:01:01  |                         |
| GGCAAGACGGAGGTTTGG                                         |       |       |       |                                                 |                      |                         |
| 55546                                                      | 55562 | 55178 | 58804 | CDS product single-stranded DNA-binding protein | 55546-55562 4:01:01  |                         |
| CCATTTTCCTCCCCACC                                          |       |       |       |                                                 |                      |                         |



|                              |       |       |       |                                                 |                                      |
|------------------------------|-------|-------|-------|-------------------------------------------------|--------------------------------------|
| 56040                        | 56064 | 55178 | 58804 | CDS product single-stranded DNA-binding protein | 56040-56064 4:01:01                  |
| GGGAACCTCTGGTAAAGGTTCTGGG    |       |       |       |                                                 |                                      |
| 56079                        | 56094 | 55178 | 58804 | CDS product single-stranded DNA-binding protein | 56079-56094 4:01:01 GGGGGACGGTAGCGGG |
| 56296                        | 56314 | 55178 | 58804 | CDS product single-stranded DNA-binding protein | 56296-56314 4:01:01                  |
| GGCCTGGTTGGCGCCATGG          |       |       |       |                                                 |                                      |
| 56387                        | 56413 | 55178 | 58804 | CDS product single-stranded DNA-binding protein | 56387-56413 5:02:01                  |
| CCAATCCTTCTTACCACCGCTTTTACC  |       |       |       |                                                 |                                      |
| 56480                        | 56502 | 55178 | 58804 | CDS product single-stranded DNA-binding protein | 56480-56502 4:01:01                  |
| CCGAGACCAGCCAGCTGCTCCC       |       |       |       |                                                 |                                      |
| 56987                        | 57006 | 55178 | 58804 | CDS product single-stranded DNA-binding protein | 56987-57006 4:01:01                  |
| CCGGCACCTGCTCGGCCTCC         |       |       |       |                                                 |                                      |
| 57280                        | 57297 | 55178 | 58804 | CDS product single-stranded DNA-binding protein | 57280-57297 4:01:01                  |
| GGTCAGTCGGTGGAGGGG           |       |       |       |                                                 |                                      |
| 57466                        | 57493 | 55178 | 58804 | CDS product single-stranded DNA-binding protein | 57466-57493 5:02:01                  |
| GGGGACATGGCTAGGGTTAGCATGGAGG |       |       |       |                                                 |                                      |
| 57631                        | 57649 | 55178 | 58804 | CDS product single-stranded DNA-binding protein | 57631-57649 4:01:01                  |
| GGTGCGGTTGGCTTTTTTG          |       |       |       |                                                 |                                      |
| 57704                        | 57715 | 55178 | 58804 | CDS product single-stranded DNA-binding protein | 57704-57715 4:01:01 CCCCCAACCCCC     |
| 57956                        | 57978 | 55178 | 58804 | CDS product single-stranded DNA-binding protein | 57956-57978 4:01:01                  |
| CCAGACGACCTCGTGATCCGGCC      |       |       |       |                                                 |                                      |
| 57975                        | 57993 | 55178 | 58804 | CDS product single-stranded DNA-binding protein | 57975-57993 4:01:01                  |
| GGCCGCGGTATTGGCCTGG          |       |       |       |                                                 |                                      |
| 58200                        | 58229 | 55178 | 58804 | CDS product single-stranded DNA-binding protein | 58200-58229 6:03:01                  |

|                                            |       |       |       |                                                 |                                                 |
|--------------------------------------------|-------|-------|-------|-------------------------------------------------|-------------------------------------------------|
| GGCAGGCAACTGGAATGGCCTCAACGGCGG             |       |       |       |                                                 |                                                 |
| 58311                                      | 58333 | 55178 | 58804 | CDS product single-stranded DNA-binding protein | 58311-58333 6:03:01                             |
| GGCTGGCGGATTTGGTATGGGG                     |       |       |       |                                                 |                                                 |
| 58540                                      | 58567 | 55178 | 58804 | CDS product single-stranded DNA-binding protein | 58540-58567 5:02:01                             |
| GGGGAGTGGAGCGTGGAGGCCGCCAGG                |       |       |       |                                                 |                                                 |
| 60624                                      | 60641 | 58964 | 61285 | CDS product DNA packaging terminase subunit 2   | 60624-60641 4:01:01                             |
| GGCGGTGAGTGGCGCCGG                         |       |       |       |                                                 |                                                 |
| 60887                                      | 60918 | 58964 | 61285 | CDS product DNA packaging terminase subunit 2   | 60887-60918 5:02:01                             |
| GGTTTATGGTTACTGCGGCTAAAGGTGATTGG           |       |       |       |                                                 |                                                 |
| 61299                                      | 61313 | 61147 | 64074 | CDS product envelope glycoprotein B             | 61299-61313 4:01:01 CCAGCTACCTCCCCC             |
| 61422                                      | 61464 | 61147 | 64074 | CDS product envelope glycoprotein B             | 61422-61464 6:03:01                             |
| CCCAGTACTCCCGCTCAACCCAGTCCGCTAAAACCGTTGACC |       |       |       |                                                 |                                                 |
| 61552                                      | 61564 | 61147 | 64074 | CDS product envelope glycoprotein B             | 61552-61564 4:01:01 CCTGCCCCGCCGCC              |
| 61980                                      | 61997 | 61147 | 64074 | CDS product envelope glycoprotein B             | 61980-61997 4:01:01 GGATGGATGCCATGGAGG          |
| 62709                                      | 62739 | 61147 | 64074 | CDS product envelope glycoprotein B             | 62709-62739 6:03:01                             |
| CCAGAACCTACTCCAACCCAAGAGAGCCTCC            |       |       |       |                                                 |                                                 |
| 63576                                      | 63605 | 61147 | 64074 | CDS product envelope glycoprotein B             | 63576-63605 6:03:01                             |
| GGCCTTGTAAGGTGGGAGAGGCAGTTGGG              |       |       |       |                                                 |                                                 |
| 63618                                      | 63633 | 61147 | 64074 | CDS product envelope glycoprotein B             | 63618-63633 4:01:01 GGAGCGGCTGGCGCGG            |
| 63696                                      | 63723 | 61147 | 64074 | CDS product envelope glycoprotein B             | 63696-63723 4:01:01 GGCTGTTGGTAATTGCGGGCTTAGTGG |
| 64317                                      | 64339 | 64268 | 64750 | CDS product protein V32                         | 64317-64339 4:01:01 GGCTGCATCGGCTACCGCGGCGG     |
| 64607                                      | 64626 | 64268 | 64750 | CDS product protein V32                         | 64607-64626 4:01:01 CCAGGGACCCCCATGTGTCC        |
| 64677                                      | 64697 | 64268 | 64750 | CDS product protein V32                         | 64677-64697 4:01:01 CCCAGACACACCCACCGCCCC       |

|                                          |       |       |       |                                                 |                     |                            |
|------------------------------------------|-------|-------|-------|-------------------------------------------------|---------------------|----------------------------|
| 65060                                    | 65076 | 64827 | 65822 | CDS product capsid scaffold protein             | 65060-65076 4:01:01 | GGCGGGCACCGGTGTGG          |
| 65182                                    | 65203 | 64827 | 65822 | CDS product capsid scaffold protein             | 65182-65203 4:01:01 | GGGGAACGCCCGGTGGGACGGG     |
| 65970                                    | 65995 | 64827 | 66770 | CDS product capsid maturation protease          | 65970-65995 5:02:01 |                            |
| CCGCAGGTGCCAACCAGCTCCGCCCC               |       |       |       |                                                 |                     |                            |
| 66063                                    | 66084 | 64827 | 66770 | CDS product capsid maturation protease          | 66063-66084 4:01:01 | CCCTCTATGCCGGCCTCGCGCC     |
| 66489                                    | 66515 | 64827 | 66770 | CDS product capsid maturation protease          | 66489-66515 5:02:01 |                            |
| CCTGCCGAGTTGCCAAAACCGCACCC               |       |       |       |                                                 |                     |                            |
| 66580                                    | 66598 | 64827 | 66770 | CDS product capsid maturation protease          | 66580-66598 4:01:01 | CCTCCCCTACCACACACCC        |
| 67734                                    | 67744 | 66885 | 68648 | CDS product DNA packaging tegument protein UL25 | 67734-67744 4:01:01 | CCTCCTCCCC                 |
| 67795                                    | 67817 | 66885 | 68648 | CDS product DNA packaging tegument protein UL25 | 67795-67817 5:02:01 |                            |
| CCACCTTCCCGATGGCTCCATCC                  |       |       |       |                                                 |                     |                            |
| 67949                                    | 67964 | 66885 | 68648 | CDS product DNA packaging tegument protein UL25 | 67949-67964 4:01:01 | GGCGGAATATGGACGG           |
| 68101                                    | 68141 | 66885 | 68648 | CDS product DNA packaging tegument protein UL25 | 68101-68141 7:04:01 |                            |
| CCCTGTACCAGGTGCCAAAACCACTCCGTTTGACCCTCCC |       |       |       |                                                 |                     |                            |
| 68356                                    | 68378 | 66885 | 68648 | CDS product DNA packaging tegument protein UL25 | 68356-68378 4:01:01 |                            |
| CCACTTTAGCCACTTGCCGCTCC                  |       |       |       |                                                 |                     |                            |
| 69157                                    | 69172 | 68749 | 69567 | CDS product nuclear protein UL24                | 69157-69172 4:01:01 | GGAGGCAAGGTTTTGG           |
| 69883                                    | 69917 | 69582 | 70640 | CDS product thymidine kinase                    | 69883-69917 6:03:01 |                            |
| CCAAAGCCGCTTTACCACGCCCTACCTGATACTCC      |       |       |       |                                                 |                     |                            |
| 69994                                    | 70015 | 69582 | 70640 | CDS product thymidine kinase                    | 69994-70015 5:02:01 | CCGCCACCCGGTCGCTCTACC      |
| 70262                                    | 70287 | 69582 | 70640 | CDS product thymidine kinase                    | 70262-70287 4:01:01 | GGGCGAGTTTGGCGCGACGGTTGGGG |
| 71166                                    | 71183 | 70858 | 73425 | CDS product envelope glycoprotein H             | 71166-71183 4:01:01 | CCTCCCAAACACCAACCC         |
| 71199                                    | 71224 | 70858 | 73425 | CDS product envelope glycoprotein H             | 71199-71224 4:01:01 | CCAGAACCCGGTGACCCACGCGGACC |

|                                              |       |       |       |                                     |
|----------------------------------------------|-------|-------|-------|-------------------------------------|
| 71370                                        | 71388 | 70858 | 73425 | CDS product envelope glycoprotein H |
| 71717                                        | 71728 | 70858 | 73425 | CDS product envelope glycoprotein H |
| 72685                                        | 72710 | 70858 | 73425 | CDS product envelope glycoprotein H |
| 72723                                        | 72739 | 70858 | 73425 | CDS product envelope glycoprotein H |
| 74379                                        | 74398 | 74243 | 75832 | CDS product tegument protein UL21   |
| 74421                                        | 74436 | 74243 | 75832 | CDS product tegument protein UL21   |
| 74680                                        | 74712 | 74243 | 75832 | CDS product tegument protein UL21   |
| GGCATCGGCCACCAGGTGGGGTCTGGTAACGG             |       |       |       |                                     |
| 74946                                        | 74971 | 74243 | 75832 | CDS product tegument protein UL21   |
| 75224                                        | 75241 | 74243 | 75832 | CDS product tegument protein UL21   |
| 75518                                        | 75550 | 74243 | 75832 | CDS product tegument protein UL21   |
| CCAAAAGCCTGGGTACCCTGGACCAATACTTCC            |       |       |       |                                     |
| 77494                                        | 77514 | 77301 | 81428 | CDS product major capsid protein    |
| 77707                                        | 77727 | 77301 | 81428 | CDS product major capsid protein    |
| 78181                                        | 78206 | 77301 | 81428 | CDS product major capsid protein    |
| 78569                                        | 78613 | 77301 | 81428 | CDS product major capsid protein    |
| CCAACCCAGGACAGCCAGATCCCCGAACCTACCCACCCAGACC  |       |       |       |                                     |
| 78715                                        | 78731 | 77301 | 81428 | CDS product major capsid protein    |
| 79120                                        | 79143 | 77301 | 81428 | CDS product major capsid protein    |
| 79430                                        | 79452 | 77301 | 81428 | CDS product major capsid protein    |
| 79554                                        | 79580 | 77301 | 81428 | CDS product major capsid protein    |
| 79860                                        | 79904 | 77301 | 81428 | CDS product major capsid protein    |
| CCCCACCAGCCCCAGCGACCCGCGCCACCCGCTCAATCCGCGCC |       |       |       |                                     |

|             |         |                             |
|-------------|---------|-----------------------------|
| 71370-71388 | 4:01:01 | GGCAACCCGGTTGGAGTGG         |
| 71717-71728 | 4:01:01 | CCGCCTTCCCCC                |
| 72685-72710 | 5:02:01 | CCGTTATCCCACCTCGCCTGTACACC  |
| 72723-72739 | 4:01:01 | GGCTTGAGGACGACGG            |
| 74379-74398 | 4:01:01 | CCACCGGCAAGCCGCTTCCC        |
| 74421-74436 | 4:01:01 | CCGCCCCCCCATAACC            |
| 74680-74712 | 7:04:01 |                             |
| 74946-74971 | 5:02:01 | CCAAGCCCGGCCATGGTTCCTCAACC  |
| 75224-75241 | 4:01:01 | GGGGCCTGGATACGGGG           |
| 75518-75550 | 5:02:01 |                             |
| 77494-77514 | 4:01:01 | GGTGCGTTTTTGGAGCTCGG        |
| 77707-77727 | 4:01:01 | GGCTTTGGGTCTGATAGGAGG       |
| 78181-78206 | 5:02:01 | GGAGGATATGGCCGCGGACGTTCCGG  |
| 78569-78613 | 8:05:02 |                             |
| 78715-78731 | 4:01:01 | GGTGCCATCAGGAGGG            |
| 79120-79143 | 5:02:01 | GGCTACGGTTTTGGCGGTACGTGG    |
| 79430-79452 | 4:01:01 | GGGAAGCAGTGGGTGGACAGGG      |
| 79554-79580 | 5:02:01 | GGGCACAGGATCTATGGGTGGATGGGG |
| 79860-79904 | 9:06:02 |                             |

|                                   |       |       |       |                                                 |                                              |
|-----------------------------------|-------|-------|-------|-------------------------------------------------|----------------------------------------------|
| 80754                             | 80787 | 77301 | 81428 | CDS product major capsid protein                | 80754-80787 6:03:01                          |
| CCGGAAACCGCCTAGGACCCCAAGGTCCCCGCC |       |       |       |                                                 |                                              |
| 80996                             | 81027 | 77301 | 81428 | CDS product major capsid protein                | 80996-81027 5:02:01                          |
| CCCCTTACCCCAACCGTGCTACCGTTAACCC   |       |       |       |                                                 |                                              |
| 81696                             | 81716 | 81661 | 82605 | CDS product capsid triplex subunit 2            | 81696-81716 4:01:01 CCAGGAGACCTGTCTCCTTCC    |
| 82235                             | 82260 | 81661 | 82605 | CDS product capsid triplex subunit 2            | 82235-82260 5:02:01                          |
| GGTCAACGGAGTGGCGAGGTCGCTGG        |       |       |       |                                                 |                                              |
| 82397                             | 82429 | 81661 | 82605 | CDS product capsid triplex subunit 2            | 82397-82429 6:03:01                          |
| CCAGCTTATCCACCAGCAGCCCGTACCCAGCC  |       |       |       |                                                 |                                              |
| 82732                             | 82747 | 82703 | 88469 | CDS product DNA packaging terminase subunit 1   | 82732-82747 5:02:01 GGTGGTAGGTGGAAGG         |
| 83331                             | 83350 | 82703 | 88469 | CDS product DNA packaging terminase subunit 1   | 83331-83350 4:01:01                          |
| CCACGCCGGTTCCTGAAGCC              |       |       |       |                                                 |                                              |
| 84312                             | 84336 | 84037 | 86157 | CDS product DNA packaging tegument protein UL17 | 84312-84336 5:02:01                          |
| CCTACTATTCCTTCAGACCACCCC          |       |       |       |                                                 |                                              |
| 84743                             | 84759 | 84037 | 86157 | CDS product DNA packaging tegument protein UL17 | 84743-84759 4:01:01                          |
| GGCGCGGCTTGAGGAGG                 |       |       |       |                                                 |                                              |
| 85291                             | 85305 | 84037 | 86157 | CDS product DNA packaging tegument protein UL17 | 85291-85305 4:01:01 GGGGGGTAGGAGGG           |
| 85458                             | 85472 | 84037 | 86157 | CDS product DNA packaging tegument protein UL17 | 85458-85472 4:01:01 CCACCGCCTGTGGCC          |
| 86218                             | 86235 | 86176 | 87285 | CDS product tegument protein UL16               | 86218-86235 4:01:01 CCTCGTTGTCCCCAACC        |
| 86601                             | 86624 | 86176 | 87285 | CDS product tegument protein UL16               | 86601-86624 5:02:01 CCGTCCGACGTGCCCAACCCTGCC |
| 86723                             | 86748 | 86176 | 87285 | CDS product tegument protein UL16               | 86723-86748 5:02:01 GGCACCGGGTGTGGTGGTATAAGG |
| 86808                             | 86830 | 86176 | 87285 | CDS product tegument protein UL16               | 86808-86830 5:02:01 GGTGGAAGGCCAGAGGTTGGG    |
| 86996                             | 87006 | 86176 | 87285 | CDS product tegument protein UL16               | 86996-87006 4:01:01 GGTGGAGGGGG              |

|                                                   |       |       |       |                                                      |                                                   |
|---------------------------------------------------|-------|-------|-------|------------------------------------------------------|---------------------------------------------------|
| 87156                                             | 87171 | 86176 | 87285 | CDS product tegument protein UL16                    | 87156-87171 4:01:01 GGATGGAACTGGTGG               |
| 87724                                             | 87735 | 82703 | 88469 | CDS product DNA packaging terminase subunit 1        | 87724-87735 4:01:01 GGCGGATGGTGG                  |
| 88888                                             | 88936 | 88499 | 89464 | CDS product tegument protein UL14                    | 88888-88936 9:06:02                               |
| GGTGGCAGCGGTGAAGCAGGCGAGTCGGAGGAATGGCTCGGTCACGAGG |       |       |       |                                                      |                                                   |
| 89341                                             | 89369 | 88499 | 89464 | CDS product tegument protein UL14                    | 89341-89369 6:03:01                               |
| GGCCCGGCCAGTCAGGAATGGCTGGGTGG                     |       |       |       |                                                      |                                                   |
| 89616                                             | 89635 | 88921 | 90717 | CDS product tegument serine/threonine protein kinase | 89616-89635 4:01:01                               |
| GGAGGTGCCGGAAGTTATGG                              |       |       |       |                                                      |                                                   |
| 91036                                             | 91059 | 90699 | 92396 | CDS product deoxyribonuclease                        | 91036-91059 4:01:01 GGTGGGACAAATGGAGATTGAGGG      |
| 91428                                             | 91443 | 90699 | 92396 | CDS product deoxyribonuclease                        | 91428-91443 4:01:01 CCGAAGCCGCCACCCC              |
| 91550                                             | 91571 | 90699 | 92396 | CDS product deoxyribonuclease                        | 91550-91571 4:01:01 GGTGTTGTGGGGCATCTTTGG         |
| 92266                                             | 92294 | 90699 | 92396 | CDS product deoxyribonuclease                        | 92266-92294 4:01:01 GGTGATTGTGGACCGCGAGGGTTGCTGGG |
| 92467                                             | 92486 | 92348 | 92575 | CDS product myristylated tegument protein            | 92467-92486 5:02:01 CCCCCGCCCCCCCCGAGGCC          |
| 93336                                             | 93355 | 92681 | 94033 | CDS product envelope glycoprotein M                  | 93336-93355 4:01:01 CCGCGCGTCCGTGGCCCGCC          |
| 94139                                             | 94160 | 93951 | 96614 | CDS product DNA replication origin-binding helicase  | 94139-94160 4:01:01                               |
| GGGGGAGACTTGGAAGAGTGGG                            |       |       |       |                                                      |                                                   |
| 95557                                             | 95575 | 93951 | 96614 | CDS product DNA replication origin-binding helicase  | 95557-95575 4:01:01                               |
| CCAATTCCCCTGACCGCC                                |       |       |       |                                                      |                                                   |
| 96035                                             | 96050 | 93951 | 96614 | CDS product DNA replication origin-binding helicase  | 96035-96050 4:01:01                               |
| GGGGGTCCGGGCTGG                                   |       |       |       |                                                      |                                                   |
| 96627                                             | 96653 | 96626 | 98881 | CDS product helicase-primase subunit                 | 96627-96653 5:02:01                               |
| GGGGGAAAACGTGGAATGGTTTAATGG                       |       |       |       |                                                      |                                                   |
| 96867                                             | 96899 | 96626 | 98881 | CDS product helicase-primase subunit                 | 96867-96899 5:02:01                               |

|                                    |        |        |        |                                               |               |                                     |
|------------------------------------|--------|--------|--------|-----------------------------------------------|---------------|-------------------------------------|
| GGTACCTGGGTGTTGGCCGTTGGCCCTCTGGG   |        |        |        |                                               |               |                                     |
| 98134                              | 98153  | 96626  | 98881  | CDS product helicase-primase subunit          | 98134-98153   | 4:01:01 GGCTTTTGGGGGCAGCTGG         |
| 99078                              | 99100  | 98942  | 99850  | CDS product tegument protein UL7              | 99078-99100   | 5:02:01 GGGGCAGGGTTTATCGGGTTGG      |
| 99199                              | 99232  | 98942  | 99850  | CDS product tegument protein UL7              | 99199-99232   | 5:02:01                             |
| GGGGAGCACTCGGGTCTGGTCAAACGGGTTGTGG |        |        |        |                                               |               |                                     |
| 99661                              | 99687  | 98942  | 99850  | CDS product tegument protein UL7              | 99661-99687   | 5:02:01 GGTCGTGAAGGAAGGGGCAGCCCCGGG |
| 99780                              | 99796  | 98942  | 99850  | CDS product tegument protein UL7              | 99780-99796   | 4:01:01 CCTCCACCATTTCGTCC           |
| 100472                             | 100488 | 99648  | 101891 | CDS product capsid portal protein             | 100472-100488 | 4:01:01 CCCGCCGTTTCCAGCCC           |
| 101126                             | 101156 | 99648  | 101891 | CDS product capsid portal protein             | 101126-101156 | 6:03:01                             |
| CCTCGCCAGTTCAACCACAGCCTCCAACCCC    |        |        |        |                                               |               |                                     |
| 101952                             | 101966 | 101875 | 104517 | CDS product helicase-primase helicase subunit | 101952-101966 | 4:01:01                             |
| CCGTCTACCTCCTCC                    |        |        |        |                                               |               |                                     |
| 104775                             | 104794 | 104567 | 105250 | CDS product nuclear protein UL4               | 104775-104794 | 4:01:01 GGTGCTGGATTGTGGCGTGG        |
| 104822                             | 104850 | 104567 | 105250 | CDS product nuclear protein UL4               | 104822-104850 | 5:02:01                             |
| CCGATAGCACCAGAGTTCCACTAACCACC      |        |        |        |                                               |               |                                     |
| 105012                             | 105030 | 104567 | 105250 | CDS product nuclear protein UL4               | 105012-105030 | 4:01:01 CCATGCCCTGACCTGTACC         |
| 106466                             | 106487 | 105971 | 106606 | CDS product nuclear protein UL3               | 106466-106487 | 5:02:01 GGGGTTGTGGGAGCGGTGGTGG      |
| 106557                             | 106578 | 105971 | 106606 | CDS product nuclear protein UL3               | 106557-106578 | 5:02:01 CCTCGACCGGCCATCCCCACCC      |
| 107008                             | 107036 | 106696 | 107640 | CDS product uracil-DNA glycosylase            | 107008-107036 | 4:01:01                             |
| CCCTGACTGGCCATTTATCCAAAAATCC       |        |        |        |                                               |               |                                     |
| 107154                             | 107175 | 106696 | 107640 | CDS product uracil-DNA glycosylase            | 107154-107175 | 4:01:01 GGGTGCATGGTACGGATCCTGG      |
| 107171                             | 107196 | 106696 | 107640 | CDS product uracil-DNA glycosylase            | 107171-107196 | 4:01:01                             |
| CCTGGCCCACGATAACCACACGAACC         |        |        |        |                                               |               |                                     |

|                                                                                                                  |                                           |
|------------------------------------------------------------------------------------------------------------------|-------------------------------------------|
| 107528 107552 106696 107640 CDS product uracil-DNA glycosylase<br>GGCTGGCTTTGCTGGTGGGTATTGG                      | 107528-107552 5:02:01                     |
| 110229 110260 110103 111713 CDS product ubiquitin E3 ligase ICP0<br>GGGGACAACGGGTCTGGGTATGGCACAGGTGG             | 110229-110260 6:03:01                     |
| 110770 110788 110103 111713 CDS product ubiquitin E3 ligase ICP0                                                 | 110770-110788 4:01:01 CCCCCACGGCTTCCCGACC |
| 110858 110904 110103 111713 CDS product ubiquitin E3 ligase ICP0<br>CCTTCTACCCCGTCCCCCGTCTTCCCGTCTTCCACGTCTACCCC | 110858-110904 7:04:01                     |
| 110912 110954 110103 111713 CDS product ubiquitin E3 ligase ICP0<br>GGGTGCGTTAGGCCTGGGTGCACGGGTCTGGGGTTTTCTGGG   | 110912-110954 6:03:01                     |
| 113124 113147 113094 117422 CDS product transcriptional regulator ICP4<br>CCGTCCTCCTCGTCCGATACCACC               | 113124-113147 6:03:01                     |
| 113212 113233 113094 117422 CDS product transcriptional regulator ICP4<br>CCAGCTCCACGTCCCCCGGTCC                 | 113212-113233 5:02:01                     |
| 113313 113337 113094 117422 CDS product transcriptional regulator ICP4<br>CCGAACCCCGGTCCCACTCAACCC               | 113313-113337 4:01:01                     |
| 113340 113356 113094 117422 CDS product transcriptional regulator ICP4<br>GGGGCTCGGCGGCGAGG                      | 113340-113356 4:01:01                     |
| 113456 113475 113094 117422 CDS product transcriptional regulator ICP4<br>GGCGGGCTCCACGGCCCCGG                   | 113456-113475 4:01:01                     |
| 113464 113488 113094 117422 CDS product transcriptional regulator ICP4<br>CCACGGCCCCGGTCCGCGCCGTCC               | 113464-113488 5:02:01                     |
| 113524 113556 113094 117422 CDS product transcriptional regulator ICP4<br>GGCCCCATCGGTTGGCCGCGGGTGGCTCTGGG       | 113524-113556 6:03:01                     |



|        |        |        |        |                                                                                              |               |         |                  |
|--------|--------|--------|--------|----------------------------------------------------------------------------------------------|---------------|---------|------------------|
| 113664 | 113682 | 113094 | 117422 | CDS product transcriptional regulator ICP4<br>GGTGGCAGTGGAACGCGGG                            | 113664-113682 | 4:01:01 |                  |
| 113691 | 113730 | 113094 | 117422 | CDS product transcriptional regulator ICP4<br>CCGGCCCCGGGTGTCCACCGTGTAGGCCACGTTGGCCGCCC      | 113691-113730 | 7:04:01 |                  |
| 113812 | 113857 | 113094 | 117422 | CDS product transcriptional regulator ICP4<br>GGGTGCTGGAAGTGAGGACCGCGCGGCTGAGGTGGCGCTCCCGGGG | 113812-113857 | 7:04:01 |                  |
| 113911 | 113929 | 113094 | 117422 | CDS product transcriptional regulator ICP4<br>GGTACTGGCTGATGGCGGG                            | 113911-113929 | 4:01:01 |                  |
| 113931 | 113948 | 113094 | 117422 | CDS product transcriptional regulator ICP4<br>CCGTCCTGGGGCCAGTCC                             | 113931-113948 | 4:01:01 |                  |
| 113987 | 114005 | 113094 | 117422 | CDS product transcriptional regulator ICP4<br>GGCGGAGCCCAGGCGAAGG                            | 113987-114005 | 4:01:01 |                  |
| 114047 | 114078 | 113094 | 117422 | CDS product transcriptional regulator ICP4<br>GGAGAGGAGCAGGACTCCCTGGGCGTTTAGGG               | 114047-114078 | 5:02:01 |                  |
| 114095 | 114114 | 113094 | 117422 | CDS product transcriptional regulator ICP4<br>CCCAGTCCAGTTGCCAGCCC                           | 114095-114114 | 4:01:01 |                  |
| 114139 | 114179 | 113094 | 117422 | CDS product transcriptional regulator ICP4<br>CCCGGTTCCCCAGGGCCGCCAGCAGCGCCGAGAGCCCCCCC      | 114139-114179 | 7:04:01 |                  |
| 114218 | 114233 | 113094 | 117422 | CDS product transcriptional regulator ICP4                                                   | 114218-114233 | 4:01:01 | GGGTCGGGTGGTTGGG |
| 114237 | 114257 | 113094 | 117422 | CDS product transcriptional regulator ICP4<br>CCACCCAGCAGGTCCTCGTCC                          | 114237-114257 | 4:01:01 |                  |
| 114320 | 114348 | 113094 | 117422 | CDS product transcriptional regulator ICP4<br>GGCAGCCCCGGCGGCGAGCGGTCCGCTGG                  | 114320-114348 | 6:03:01 |                  |

|        |        |        |        |                                                                                                                         |               |          |                 |
|--------|--------|--------|--------|-------------------------------------------------------------------------------------------------------------------------|---------------|----------|-----------------|
| 114372 | 114391 | 113094 | 117422 | CDS product transcriptional regulator ICP4<br>CCCTCCCTGGCCGAGGCC                                                        | 114372-114391 | 4:01:01  |                 |
| 114400 | 114473 | 113094 | 117422 | CDS product transcriptional regulator ICP4<br>GGGCTGCGATGGTAGCCAGGGCCTGGGGTCTGAAGGTAAGCGCGGGCGCCAGGCCTCGGGGAACAGCGGGTGG | 114400-114473 | 11:08:02 |                 |
| 114530 | 114545 | 113094 | 117422 | CDS product transcriptional regulator ICP4                                                                              | 114530-114545 | 4:01:01  | GGGGGTGGCGTGTGG |
| 114580 | 114607 | 113094 | 117422 | CDS product transcriptional regulator ICP4<br>GGCGGTGTGGCCCTCGGGCGGCATGGG                                               | 114580-114607 | 6:03:01  |                 |
| 114687 | 114725 | 113094 | 117422 | CDS product transcriptional regulator ICP4<br>CCTCCGCGGGACCCGGGAGCTCCCCGCCCGGCTCC                                       | 114687-114725 | 8:05:02  |                 |
| 114740 | 114769 | 113094 | 117422 | CDS product transcriptional regulator ICP4<br>CCGCTTCCCGCTCTTGCCCTGGGGCGCCC                                             | 114740-114769 | 4:01:01  |                 |
| 114776 | 114808 | 113094 | 117422 | CDS product transcriptional regulator ICP4<br>GGGACGGTCGTTCGGGGAGGCGTAGGGTGCCGG                                         | 114776-114808 | 6:03:01  |                 |
| 114805 | 114821 | 113094 | 117422 | CDS product transcriptional regulator ICP4<br>CCGGTCCGCCCCCTCCC                                                         | 114805-114821 | 5:02:01  |                 |
| 114844 | 114876 | 113094 | 117422 | CDS product transcriptional regulator ICP4<br>GGCCGAGGATAGCCTGGGAGGCAGCCGGTGGGG                                         | 114844-114876 | 6:03:01  |                 |
| 114896 | 114937 | 113094 | 117422 | CDS product transcriptional regulator ICP4<br>GGGGCGAGCCTGGGTCTGGGTGGCCCGGAGCAGGTTGTCGG                                 | 114896-114937 | 7:04:01  |                 |
| 115002 | 115049 | 113094 | 117422 | CDS product transcriptional regulator ICP4<br>GGCTTCCCGGAACAGTGGGCCACAAGGCGGGGATGCGGGAGGTCTGG                           | 115002-115049 | 8:05:02  |                 |
| 115058 | 115071 | 113094 | 117422 | CDS product transcriptional regulator ICP4                                                                              | 115058-115071 | 4:01:01  | GGAGGAGGAGAGGG  |
| 115137 | 115166 | 113094 | 117422 | CDS product transcriptional regulator ICP4                                                                              | 115137-115166 | 6:03:01  |                 |

|                                                                        |               |         |                 |
|------------------------------------------------------------------------|---------------|---------|-----------------|
| CCCACGGCTTCCCCAACATGCCCCGGCC                                           |               |         |                 |
| 115187 115224 113094 117422 CDS product transcriptional regulator ICP4 | 115187-115224 | 7:04:01 |                 |
| GGCCTGGGTGATGGTCCAGGCCGAGGCCCGGGCCCGGG                                 |               |         |                 |
| 115202 115232 113094 117422 CDS product transcriptional regulator ICP4 | 115202-115232 | 6:03:01 |                 |
| CCAGGCCGAGGCCCGGGCCCGGGCTCCCTCC                                        |               |         |                 |
| 115267 115289 113094 117422 CDS product transcriptional regulator ICP4 | 115267-115289 | 4:01:01 |                 |
| CCACAACCAGAACCGCGCGGACC                                                |               |         |                 |
| 115307 115328 113094 117422 CDS product transcriptional regulator ICP4 | 115307-115328 | 5:02:01 |                 |
| GGGGCCCAGGCGGTGGATAGGG                                                 |               |         |                 |
| 115430 115451 113094 117422 CDS product transcriptional regulator ICP4 | 115430-115451 | 5:02:01 |                 |
| GGGAGGGCAGGCGGGAGAGGGG                                                 |               |         |                 |
| 115568 115605 113094 117422 CDS product transcriptional regulator ICP4 | 115568-115605 | 8:05:02 |                 |
| GGCGGTAGGCTTGGGGTTCTGGTACCAGGACCCGCGG                                  |               |         |                 |
| 115593 115610 113094 117422 CDS product transcriptional regulator ICP4 | 115593-115610 | 4:01:01 |                 |
| CCAGGACCCGCGGCCGCC                                                     |               |         |                 |
| 115619 115644 113094 117422 CDS product transcriptional regulator ICP4 | 115619-115644 | 4:01:01 |                 |
| CCGTGGCCCGAGGGCCGCGCACACC                                              |               |         |                 |
| 115676 115690 113094 117422 CDS product transcriptional regulator ICP4 | 115676-115690 | 4:01:01 | GGCCGGGGGATCCGG |
| 115729 115745 113094 117422 CDS product transcriptional regulator ICP4 | 115729-115745 | 4:01:01 |                 |
| CCGTGACCCCGGCCGCC                                                      |               |         |                 |
| 115840 115869 113094 117422 CDS product transcriptional regulator ICP4 | 115840-115869 | 5:02:01 |                 |
| GGTCGTAGCGGCGGCTCATGGCCACCGAGG                                         |               |         |                 |
| 115901 115921 113094 117422 CDS product transcriptional regulator ICP4 | 115901-115921 | 4:01:01 |                 |

|                                                                        |               |          |               |  |  |  |
|------------------------------------------------------------------------|---------------|----------|---------------|--|--|--|
| CCCGGCCGCCATGGCGTCCCC                                                  |               |          |               |  |  |  |
| 115996 116022 113094 117422 CDS product transcriptional regulator ICP4 | 115996-116022 | 5:02:01  |               |  |  |  |
| GGCAGAACTGGGCCAGGTTCTGGTCGG                                            |               |          |               |  |  |  |
| 116136 116157 113094 117422 CDS product transcriptional regulator ICP4 | 116136-116157 | 5:02:01  |               |  |  |  |
| GGTACGGCGGTCTGGGCTTCGG                                                 |               |          |               |  |  |  |
| 116194 116227 113094 117422 CDS product transcriptional regulator ICP4 | 116194-116227 | 6:03:01  |               |  |  |  |
| CCCAGAGCCCGTCCCGCGAGTCCCGGTTCCCCC                                      |               |          |               |  |  |  |
| 116264 116284 113094 117422 CDS product transcriptional regulator ICP4 | 116264-116284 | 4:01:01  |               |  |  |  |
| GGGCCATGGGTCTCCGGATGG                                                  |               |          |               |  |  |  |
| 116370 116426 113094 117422 CDS product transcriptional regulator ICP4 | 116370-116426 | 11:08:02 |               |  |  |  |
| GGGAGGGCCTCTTCGGCCCCGGTTGTGGCGCGGTCTGGGGTATGGGTCTTGGGTGG               |               |          |               |  |  |  |
| 116557 116570 113094 117422 CDS product transcriptional regulator ICP4 | 116557-116570 | 4:01:01  | CCCTAACCCCTCC |  |  |  |
| 116595 116637 113094 117422 CDS product transcriptional regulator ICP4 | 116595-116637 | 6:03:01  |               |  |  |  |
| GGGCGAGGGGCCCGCCCGGTTACTCGGGTGGGAGCGCCGG                               |               |          |               |  |  |  |
| 116742 116797 113094 117422 CDS product transcriptional regulator ICP4 | 116742-116797 | 11:08:02 |               |  |  |  |
| GGGACCCGGTGGCCGTTGGGTTTTTGC GCGCTCGGCGAGGATGGGGGCGAGG                  |               |          |               |  |  |  |
| 116930 116954 113094 117422 CDS product transcriptional regulator ICP4 | 116930-116954 | 5:02:01  |               |  |  |  |
| CCGGCCCCTTGGCGCCGCCTCCCC                                               |               |          |               |  |  |  |
| 116957 117009 113094 117422 CDS product transcriptional regulator ICP4 | 116957-117009 | 10:07:02 |               |  |  |  |
| GGGGGAGGCCGAGGGTGGAACTCGGCCCGGGAGACCCCGGCAGGTCTCGG                     |               |          |               |  |  |  |
| 117039 117083 113094 117422 CDS product transcriptional regulator ICP4 | 117039-117083 | 8:05:02  |               |  |  |  |
| CCTCCGCCGATGATCCGGTGTCCCTGCGACCGGCCCTGTAGCC                            |               |          |               |  |  |  |
| 117166 117190 113094 117422 CDS product transcriptional regulator ICP4 | 117166-117190 | 5:02:01  |               |  |  |  |

|                                                                             |               |         |                      |
|-----------------------------------------------------------------------------|---------------|---------|----------------------|
| CCGGAGACCGCTTTGCCTTCCCGCC                                                   |               |         |                      |
| 117193 117221 113094 117422 CDS product transcriptional regulator ICP4      | 117193-117221 | 7:04:01 |                      |
| GGGGCTCGGGGGCCGGGAAGGCGGCGGG                                                |               |         |                      |
| 117256 117280 113094 117422 CDS product transcriptional regulator ICP4      | 117256-117280 | 4:01:01 |                      |
| CCACCCCAAACATCCCCTGGCTTCC                                                   |               |         |                      |
| 117294 117311 113094 117422 CDS product transcriptional regulator ICP4      | 117294-117311 | 4:01:01 |                      |
| GGGGCGGCCGGGTATGG                                                           |               |         |                      |
| 117323 117347 113094 117422 CDS product transcriptional regulator ICP4      | 117323-117347 | 4:01:01 |                      |
| GGCCGCGCTGGCTGCGCGGATGAGG                                                   |               |         |                      |
| 120131 120166 120069 120923 CDS product regulatory protein ICP22            | 120131-120166 | 8:05:02 |                      |
| CCGTCCACCAGCCCCATCATACCTCCCTGTCCCCC                                         |               |         |                      |
| 120181 120200 120069 120923 CDS product regulatory protein ICP22            | 120181-120200 | 4:01:01 | CCCATCCCCACGCTCCAGCC |
| 120599 120623 120069 120923 CDS product regulatory protein ICP22            | 120599-120623 | 5:02:01 |                      |
| CCGCCCAGCAAGCCACCCAAAACCC                                                   |               |         |                      |
| 120670 120687 120069 120923 CDS product regulatory protein ICP22            | 120670-120687 | 4:01:01 | GGAGGAAGAGGCTAGCGG   |
| 120823 120851 120069 120923 CDS product regulatory protein ICP22            | 120823-120851 | 6:03:01 |                      |
| CCCCACCAACCTCCCACCACAGTGCCC                                                 |               |         |                      |
| 123126 123138 122631 123491 CDS product virion protein V67                  | 123126-123138 | 4:01:01 | GGAGGTGGTAGGG        |
| 123669 123688 123585 124559 CDS product virion protein US2                  | 123669-123688 | 4:01:01 | GGAGATAGGTGCTAGGTGG  |
| 125395 125435 124695 125849 CDS product serine/threonine protein kinase US3 | 125395-125435 | 7:04:01 |                      |
| GGTTGTGGACCCCATGGACCTTGGTTTGGCTGGTACCGTGG                                   |               |         |                      |
| 126059 126083 125970 127277 CDS product envelope glycoprotein G             | 126059-126083 | 4:01:01 |                      |
| CCCCGCAAAACCGGTCCCATGCCCC                                                   |               |         |                      |

|                                           |        |        |        |                                     |
|-------------------------------------------|--------|--------|--------|-------------------------------------|
| 127602                                    | 127642 | 127455 | 129707 | CDS product envelope glycoprotein J |
| CCCCCACCACGGGCCCCACTACCACATCTTCCCAAACATCC |        |        |        |                                     |
| 128583                                    | 128595 | 127455 | 129707 | CDS product envelope glycoprotein J |
| 128961                                    | 128982 | 127455 | 129707 | CDS product envelope glycoprotein J |
| 129282                                    | 129302 | 127455 | 129707 | CDS product envelope glycoprotein J |
| 129897                                    | 129913 | 129798 | 131006 | CDS product envelope glycoprotein D |
| 129929                                    | 129947 | 129798 | 131006 | CDS product envelope glycoprotein D |
| 130718                                    | 130734 | 129798 | 131006 | CDS product envelope glycoprotein D |
| 131507                                    | 131529 | 131111 | 132373 | CDS product envelope glycoprotein I |
| 131626                                    | 131643 | 131111 | 132373 | CDS product envelope glycoprotein I |
| 131755                                    | 131772 | 131111 | 132373 | CDS product envelope glycoprotein I |
| 131956                                    | 131985 | 131111 | 132373 | CDS product envelope glycoprotein I |
| CCACCCCCCAAACCGCAAACCACTTCTTCC            |        |        |        |                                     |
| 132203                                    | 132222 | 131111 | 132373 | CDS product envelope glycoprotein I |
| 132269                                    | 132290 | 131111 | 132373 | CDS product envelope glycoprotein I |
| 133362                                    | 133389 | 132593 | 134239 | CDS product envelope glycoprotein E |
| CCCAACCGCTATGGCCTGCCTGCACCCC              |        |        |        |                                     |
| 133618                                    | 133635 | 132593 | 134239 | CDS product envelope glycoprotein E |
| 134041                                    | 134058 | 132593 | 134239 | CDS product envelope glycoprotein E |
| 134107                                    | 134130 | 132593 | 134239 | CDS product envelope glycoprotein E |
| 134173                                    | 134192 | 132593 | 134239 | CDS product envelope glycoprotein E |
| 134470                                    | 134492 | 134273 | 134605 | CDS product membrane protein US8A   |
| 135041                                    | 135054 | 134911 | 135573 | CDS product membrane protein US9    |

|               |         |                          |
|---------------|---------|--------------------------|
| 127602-127642 | 7:04:01 |                          |
| 128583-128595 | 4:01:01 | CCACCAAACCCCC            |
| 128961-128982 | 5:02:01 | CCCCACCCCCACAAGGCAACC    |
| 129282-129302 | 4:01:01 | CCACAATACCATGTCCAGGCC    |
| 129897-129913 | 4:01:01 | GGCGTGTGGTTCGGGGG        |
| 129929-129947 | 4:01:01 | CCCGAGTTTCCACCACCCC      |
| 130718-130734 | 4:01:01 | CCAAAACCCAATCCACC        |
| 131507-131529 | 4:01:01 | CCCGGCCACAGCCCGAGATTCC   |
| 131626-131643 | 4:01:01 | CCAGAGCCAGTTCCAACC       |
| 131755-131772 | 4:01:01 | CCGACTCCTCGCCCAGCC       |
| 131956-131985 | 6:03:01 |                          |
| 132203-132222 | 4:01:01 | GGAGCCGGTTGGCGTGTGGG     |
| 132269-132290 | 5:02:01 | CCTCGCCACCATCCCACAAGCC   |
| 133362-133389 | 5:02:01 |                          |
| 133618-133635 | 4:01:01 | GGACATCCGGAGGCGTGG       |
| 134041-134058 | 5:02:01 | CCACAACCTCCACCAGCC       |
| 134107-134130 | 5:02:01 | GGCCGGTCGGGTTTCAAGGTCTGG |
| 134173-134192 | 4:01:01 | CCAACCCACCCGTCGGACC      |
| 134470-134492 | 5:02:01 | CCACCATCTCCAGAACCCGAGCC  |
| 135041-135054 | 4:01:01 | GGCAGAGGCGGTGG           |

|                                                                      |        |        |        |                                      |               |          |                            |
|----------------------------------------------------------------------|--------|--------|--------|--------------------------------------|---------------|----------|----------------------------|
| 135065                                                               | 135087 | 134911 | 135573 | CDS product membrane protein US9     | 135065-135087 | 4:01:01  | GGAGGTAGCTACGGCTGCTTTGG    |
| 135206                                                               | 135224 | 134911 | 135573 | CDS product membrane protein US9     | 135206-135224 | 4:01:01  | CCCCCGTCCCCAGAGGCC         |
| 135221                                                               | 135246 | 134911 | 135573 | CDS product membrane protein US9     | 135221-135246 | 5:02:01  |                            |
| GGCCGTAGGTATTGAGGATGTGGTGG                                           |        |        |        |                                      |               |          |                            |
| 135418                                                               | 135435 | 134911 | 135573 | CDS product membrane protein US9     | 135418-135435 | 4:01:01  | CGCCAGCCTGTTCATCC          |
| 135439                                                               | 135473 | 134911 | 135573 | CDS product membrane protein US9     | 135439-135473 | 8:05:02  |                            |
| GGGTCGGCCGGCGGCAGGCGCGGCGACACAGGCGG                                  |        |        |        |                                      |               |          |                            |
| 135968                                                               | 136035 | 135917 | 136603 | CDS product virion protein US10      | 135968-136035 | 13:10:03 |                            |
| GGGGGCAGGGGAGCGGGAGCTTTCGGCCTCGGGTACGCAGGTACGCGGCGGCGGCGGCGTGTCTGGGG |        |        |        |                                      |               |          |                            |
| 136044                                                               | 136079 | 135917 | 136603 | CDS product virion protein US10      | 136044-136079 | 7:04:01  |                            |
| CCGGATCGGCCCCCGCCATGTCCAGCAGCGCCACCC                                 |        |        |        |                                      |               |          |                            |
| 136253                                                               | 136276 | 135917 | 136603 | CDS product virion protein US10      | 136253-136276 | 4:01:01  | GGCGGGCGCCTAGGTCTACCAGG    |
| 136272                                                               | 136288 | 135917 | 136603 | CDS product virion protein US10      | 136272-136288 | 4:01:01  | CCAGGTACCTCCCCACC          |
| 136525                                                               | 136551 | 135917 | 136603 | CDS product virion protein US10      | 136525-136551 | 6:03:01  | CCCCTACCGCCTCCGCAGTCTCCCCC |
| 136562                                                               | 136576 | 135917 | 136603 | CDS product virion protein US10      | 136562-136576 | 4:01:01  | CCCCGTCTACCGCC             |
| 137197                                                               | 137225 | 137127 | 137981 | CDS product regulatory protein ICP22 | 137197-137225 | 6:03:01  |                            |
| GGGCACGTGTGGTGGGAGGGTTGGTGGGG                                        |        |        |        |                                      |               |          |                            |
| 137361                                                               | 137378 | 137127 | 137981 | CDS product regulatory protein ICP22 | 137361-137378 | 4:01:01  | CCGCTAGCCTCTTCCTCC         |
| 137425                                                               | 137449 | 137127 | 137981 | CDS product regulatory protein ICP22 | 137425-137449 | 5:02:01  |                            |
| GGGTTTTGGGTGGCTTGCTGGGCGG                                            |        |        |        |                                      |               |          |                            |
| 137848                                                               | 137867 | 137127 | 137981 | CDS product regulatory protein ICP22 | 137848-137867 | 4:01:01  | GGCTGGAGCGTGGGGATGGG       |
| 137882                                                               | 137917 | 137127 | 137981 | CDS product regulatory protein ICP22 | 137882-137917 | 8:05:02  |                            |
| GGGGGACAGGGAGGGTATGATGGGGCTGGTGGACGG                                 |        |        |        |                                      |               |          |                            |

|        |        |        |        |                                                                                                       |               |                        |
|--------|--------|--------|--------|-------------------------------------------------------------------------------------------------------|---------------|------------------------|
| 140701 | 140725 | 140628 | 144956 | CDS product transcriptional regulator ICP4<br>CCTCATCCGCGCAGCCAGCGCGGCC                               | 140701-140725 | 4:01:01                |
| 140737 | 140754 | 140628 | 144956 | CDS product transcriptional regulator ICP4<br>CCATACCCCGGCCGCCCC                                      | 140737-140754 | 4:01:01                |
| 140768 | 140792 | 140628 | 144956 | CDS product transcriptional regulator ICP4<br>GGAAGCCAGGGGATGTTGGGGTGG                                | 140768-140792 | 4:01:01                |
| 140827 | 140855 | 140628 | 144956 | CDS product transcriptional regulator ICP4<br>CCCGCCGCTTCCCCGCCCCGAGCCCC                              | 140827-140855 | 7:04:01                |
| 140858 | 140882 | 140628 | 144956 | CDS product transcriptional regulator ICP4<br>GGCGGAAGGCAAAGCGGTCTCCGG                                | 140858-140882 | 5:02:01                |
| 140965 | 141009 | 140628 | 144956 | CDS product transcriptional regulator ICP4<br>GGCTACAGGGCCGGTCGCAGGGACACGGATCATCGGGCGGAGG             | 140965-141009 | 8:05:02                |
| 141039 | 141091 | 140628 | 144956 | CDS product transcriptional regulator ICP4<br>CCGAGACCTGCCGGGGTCTCCCGGGCCGAGTTTCCACCCTCGGCCTCCCC      | 141039-141091 | 10:07:02               |
| 141094 | 141118 | 140628 | 144956 | CDS product transcriptional regulator ICP4<br>GGGGAGGCCGGCGCCAAGGGGCCGG                               | 141094-141118 | 5:02:01                |
| 141251 | 141306 | 140628 | 144956 | CDS product transcriptional regulator ICP4<br>CCTCGCCCCATCCCTCGCGAGCGCGCAAAAACCAACCGGCCACCGGTCCCC     | 141251-141306 | 11:08:02               |
| 141411 | 141453 | 140628 | 144956 | CDS product transcriptional regulator ICP4<br>CCGGCGTCCCACCCGAGTAACCGGGCGGGCCCCTCGCCCC                | 141411-141453 | 6:03:01                |
| 141478 | 141491 | 140628 | 144956 | CDS product transcriptional regulator ICP4                                                            | 141478-141491 | 4:01:01 GGAGGGGGTTAGGG |
| 141622 | 141678 | 140628 | 144956 | CDS product transcriptional regulator ICP4<br>CCACCCAAGACCCATACCCAGACCGCGCCACAACCGGGGCCGAAGAGGCCCTCCC | 141622-141678 | 11:08:02               |



|                                       |        |        |        |                                            |               |         |                 |
|---------------------------------------|--------|--------|--------|--------------------------------------------|---------------|---------|-----------------|
| 141764                                | 141784 | 140628 | 144956 | CDS product transcriptional regulator ICP4 | 141764-141784 | 4:01:01 |                 |
| CCATCCGGAGACCCATGGCCC                 |        |        |        |                                            |               |         |                 |
| 141821                                | 141854 | 140628 | 144956 | CDS product transcriptional regulator ICP4 | 141821-141854 | 6:03:01 |                 |
| GGGGGAACCGGGGACTCGCGGGACGGGCTCTGGG    |        |        |        |                                            |               |         |                 |
| 141891                                | 141912 | 140628 | 144956 | CDS product transcriptional regulator ICP4 | 141891-141912 | 5:02:01 |                 |
| CCGAAGCCCAGACCGCCGTACC                |        |        |        |                                            |               |         |                 |
| 142026                                | 142052 | 140628 | 144956 | CDS product transcriptional regulator ICP4 | 142026-142052 | 5:02:01 |                 |
| CCGACCAGAACCTGGCCCAGTTCTGCC           |        |        |        |                                            |               |         |                 |
| 142127                                | 142147 | 140628 | 144956 | CDS product transcriptional regulator ICP4 | 142127-142147 | 4:01:01 |                 |
| GGGGACGCCATGGCGGCCGGG                 |        |        |        |                                            |               |         |                 |
| 142179                                | 142208 | 140628 | 144956 | CDS product transcriptional regulator ICP4 | 142179-142208 | 5:02:01 |                 |
| CCTCGGTGGCCATGAGCCGCCGCTACGACC        |        |        |        |                                            |               |         |                 |
| 142303                                | 142319 | 140628 | 144956 | CDS product transcriptional regulator ICP4 | 142303-142319 | 4:01:01 |                 |
| GGCGGCCGGGGTCACGG                     |        |        |        |                                            |               |         |                 |
| 142358                                | 142372 | 140628 | 144956 | CDS product transcriptional regulator ICP4 | 142358-142372 | 4:01:01 | CCGGATCCCCCGGCC |
| 142404                                | 142429 | 140628 | 144956 | CDS product transcriptional regulator ICP4 | 142404-142429 | 4:01:01 |                 |
| GGGTGTGCGCGGCCCTCGGGCCACGG            |        |        |        |                                            |               |         |                 |
| 142438                                | 142455 | 140628 | 144956 | CDS product transcriptional regulator ICP4 | 142438-142455 | 4:01:01 |                 |
| GGCGGCCGCGGGTCCTGG                    |        |        |        |                                            |               |         |                 |
| 142443                                | 142480 | 140628 | 144956 | CDS product transcriptional regulator ICP4 | 142443-142480 | 8:05:02 |                 |
| CCGCGGGTCCTGGTACCAGAACCCCAAGCCTACCGCC |        |        |        |                                            |               |         |                 |
| 142597                                | 142618 | 140628 | 144956 | CDS product transcriptional regulator ICP4 | 142597-142618 | 5:02:01 |                 |
| CCCCTCTCCCGCCTGCCCTCCC                |        |        |        |                                            |               |         |                 |

|        |        |        |        |                                                                                               |               |         |                |
|--------|--------|--------|--------|-----------------------------------------------------------------------------------------------|---------------|---------|----------------|
| 142720 | 142741 | 140628 | 144956 | CDS product transcriptional regulator ICP4<br>CCCTATCCACCGCCTGGGCCCC                          | 142720-142741 | 5:02:01 |                |
| 142759 | 142781 | 140628 | 144956 | CDS product transcriptional regulator ICP4<br>GGTCCGCGCGTTCTGGTTGTGG                          | 142759-142781 | 4:01:01 |                |
| 142816 | 142846 | 140628 | 144956 | CDS product transcriptional regulator ICP4<br>GGAGGGAGCCCGGGCCCGGCCTCGGCCTGG                  | 142816-142846 | 6:03:01 |                |
| 142824 | 142861 | 140628 | 144956 | CDS product transcriptional regulator ICP4<br>CCCGGGCCCGGGCCTCGGCCTGGACCATCACCCAGGCC          | 142824-142861 | 7:04:01 |                |
| 142882 | 142911 | 140628 | 144956 | CDS product transcriptional regulator ICP4<br>GGCCGGGGGCATGTTGGGGGAAGCCGTGGG                  | 142882-142911 | 6:03:01 |                |
| 142977 | 142990 | 140628 | 144956 | CDS product transcriptional regulator ICP4                                                    | 142977-142990 | 4:01:01 | CCCTCTCCTCCTCC |
| 142999 | 143046 | 140628 | 144956 | CDS product transcriptional regulator ICP4<br>CCAGACCTCCCGCATCCCCGCCTTGTGGCCCACTGTTCCCGGAAGCC | 142999-143046 | 8:05:02 |                |
| 143111 | 143152 | 140628 | 144956 | CDS product transcriptional regulator ICP4<br>CCGACAACCTGCTCCCGGGCCACCCAGACCCAGGCTCGCCCC      | 143111-143152 | 7:04:01 |                |
| 143172 | 143204 | 140628 | 144956 | CDS product transcriptional regulator ICP4<br>CCCCACCGGCTGCCTCCCAGGCTATCCTCGGCC               | 143172-143204 | 6:03:01 |                |
| 143227 | 143243 | 140628 | 144956 | CDS product transcriptional regulator ICP4<br>GGGAGGGGGCGGACCGG                               | 143227-143243 | 5:02:01 |                |
| 143240 | 143272 | 140628 | 144956 | CDS product transcriptional regulator ICP4<br>CCGGCACCTACGCCTCCCCGAACGACCGTCCC                | 143240-143272 | 6:03:01 |                |
| 143279 | 143308 | 140628 | 144956 | CDS product transcriptional regulator ICP4<br>GGGCGCCCCAGGGGCAAGAGCGGAAGCGG                   | 143279-143308 | 4:01:01 |                |

|                                                                          |        |        |        |                                            |               |          |                  |
|--------------------------------------------------------------------------|--------|--------|--------|--------------------------------------------|---------------|----------|------------------|
| 143323                                                                   | 143361 | 140628 | 144956 | CDS product transcriptional regulator ICP4 | 143323-143361 | 8:05:02  |                  |
| GGAGCCGGCGGGGGGAGCTCCCGGGTCCCGCGGAGG                                     |        |        |        |                                            |               |          |                  |
| 143441                                                                   | 143468 | 140628 | 144956 | CDS product transcriptional regulator ICP4 | 143441-143468 | 6:03:01  |                  |
| CCCATGCCGCCGAGGGGCCACACCGCC                                              |        |        |        |                                            |               |          |                  |
| 143503                                                                   | 143518 | 140628 | 144956 | CDS product transcriptional regulator ICP4 | 143503-143518 | 4:01:01  | CCACACGCCACCCCCC |
| 143575                                                                   | 143648 | 140628 | 144956 | CDS product transcriptional regulator ICP4 | 143575-143648 | 11:08:02 |                  |
| CCACCCGCTGTTCCCGAGGCCTGGCGCCCCGCGCTTACCTTCGACCCCAGGCCCTGGCTACCATCGCAGCCC |        |        |        |                                            |               |          |                  |
| 143657                                                                   | 143676 | 140628 | 144956 | CDS product transcriptional regulator ICP4 | 143657-143676 | 4:01:01  |                  |
| GGGCCTCCGCCAGGGAGGG                                                      |        |        |        |                                            |               |          |                  |
| 143700                                                                   | 143728 | 140628 | 144956 | CDS product transcriptional regulator ICP4 | 143700-143728 | 6:03:01  |                  |
| CCAGCGGACCGCTCCGCCCGGGGCTGCC                                             |        |        |        |                                            |               |          |                  |
| 143791                                                                   | 143811 | 140628 | 144956 | CDS product transcriptional regulator ICP4 | 143791-143811 | 4:01:01  |                  |
| GGACGAGGACCTGCTGGGTGG                                                    |        |        |        |                                            |               |          |                  |
| 143815                                                                   | 143830 | 140628 | 144956 | CDS product transcriptional regulator ICP4 | 143815-143830 | 4:01:01  | CCCAACCACCCGACCC |
| 143869                                                                   | 143909 | 140628 | 144956 | CDS product transcriptional regulator ICP4 | 143869-143909 | 7:04:01  |                  |
| GGGGGGCTCTCGGCGTGCTGGCGGCCCTGGGGAACCGGG                                  |        |        |        |                                            |               |          |                  |
| 143934                                                                   | 143953 | 140628 | 144956 | CDS product transcriptional regulator ICP4 | 143934-143953 | 4:01:01  |                  |
| GGGCTGGCAACTGGACTGGG                                                     |        |        |        |                                            |               |          |                  |
| 143970                                                                   | 144001 | 140628 | 144956 | CDS product transcriptional regulator ICP4 | 143970-144001 | 5:02:01  |                  |
| CCCTAAACGCCCAGGAGTCCTGCTCCTCTCC                                          |        |        |        |                                            |               |          |                  |
| 144043                                                                   | 144061 | 140628 | 144956 | CDS product transcriptional regulator ICP4 | 144043-144061 | 4:01:01  |                  |
| CCTTCGCCTGGGCTCCGCC                                                      |        |        |        |                                            |               |          |                  |
| 144100                                                                   | 144117 | 140628 | 144956 | CDS product transcriptional regulator ICP4 | 144100-144117 | 4:01:01  |                  |

|                                               |        |        |        |                                            |               |         |  |
|-----------------------------------------------|--------|--------|--------|--------------------------------------------|---------------|---------|--|
| GGACTGGCCCCAGGACGG                            |        |        |        |                                            |               |         |  |
| 144119                                        | 144137 | 140628 | 144956 | CDS product transcriptional regulator ICP4 | 144119-144137 | 4:01:01 |  |
| CCCCCATCAGCCAGTACC                            |        |        |        |                                            |               |         |  |
| 144191                                        | 144236 | 140628 | 144956 | CDS product transcriptional regulator ICP4 | 144191-144236 | 7:04:01 |  |
| CCCCGGGAGCGCCACCTCAGCCGCGGGTCCTCACTTCCAGCACCC |        |        |        |                                            |               |         |  |
| 144318                                        | 144357 | 140628 | 144956 | CDS product transcriptional regulator ICP4 | 144318-144357 | 7:04:01 |  |
| GGGCGGCAACGTGGCCTACACGGTGGACACCCGGGCGCG       |        |        |        |                                            |               |         |  |
| 144366                                        | 144384 | 140628 | 144956 | CDS product transcriptional regulator ICP4 | 144366-144384 | 4:01:01 |  |
| CCGCGTTCCACTGCCACC                            |        |        |        |                                            |               |         |  |
| 144492                                        | 144524 | 140628 | 144956 | CDS product transcriptional regulator ICP4 | 144492-144524 | 6:03:01 |  |
| CCCAGAGCCACCGCGCGCCAACCGATGGGGCC              |        |        |        |                                            |               |         |  |
| 144560                                        | 144584 | 140628 | 144956 | CDS product transcriptional regulator ICP4 | 144560-144584 | 5:02:01 |  |
| GGACGGCGCGGAGCCGGGGCCGTGG                     |        |        |        |                                            |               |         |  |
| 144573                                        | 144592 | 140628 | 144956 | CDS product transcriptional regulator ICP4 | 144573-144592 | 4:01:01 |  |
| CCGGGGCCGTGGAGCCCGCC                          |        |        |        |                                            |               |         |  |
| 144692                                        | 144708 | 140628 | 144956 | CDS product transcriptional regulator ICP4 | 144692-144708 | 4:01:01 |  |
| CCTCGCCGCGAGCCCC                              |        |        |        |                                            |               |         |  |
| 144711                                        | 144735 | 140628 | 144956 | CDS product transcriptional regulator ICP4 | 144711-144735 | 4:01:01 |  |
| GGGTTGAGTGGGAGCCGGGTTTCGG                     |        |        |        |                                            |               |         |  |
| 144815                                        | 144836 | 140628 | 144956 | CDS product transcriptional regulator ICP4 | 144815-144836 | 5:02:01 |  |
| GGACCGGGGACGTGGAGCTGG                         |        |        |        |                                            |               |         |  |
| 144901                                        | 144924 | 140628 | 144956 | CDS product transcriptional regulator ICP4 | 144901-144924 | 6:03:01 |  |
| GGTGGTATCGGACGAGGAGGACGG                      |        |        |        |                                            |               |         |  |

|                                                                   |      |      |      |                                                  |                                             |
|-------------------------------------------------------------------|------|------|------|--------------------------------------------------|---------------------------------------------|
| gi 9629818 ref NC_001847.1  Bovine herpesvirus 1, complete genome |      |      |      |                                                  |                                             |
| 492                                                               | 530  | 486  | 1229 | CDS product myristylated tegument protein CIRC   | 492-530 9:06:02                             |
|                                                                   |      |      |      | CCCGCGCCTCCGCGCCTGCTGCCGGCCCCCCCCAGCCC           |                                             |
| 619                                                               | 656  | 486  | 1229 | CDS product myristylated tegument protein CIRC   | 619-656 6:03:01                             |
|                                                                   |      |      |      | CCCCGTGTACCACCACATGCGCCGCGGCCGACGGCCC            |                                             |
| 682                                                               | 707  | 486  | 1229 | CDS product myristylated tegument protein CIRC   | 682-707 5:02:01 CCGCGCCTATGCCATCTTGCCCTGCC  |
| 758                                                               | 784  | 486  | 1229 | CDS product myristylated tegument protein CIRC   | 758-784 6:03:01 CCCACCACTGGCCTGCACCGCCTCGCC |
| 888                                                               | 902  | 486  | 1229 | CDS product myristylated tegument protein CIRC   | 888-902 4:01:01 CCACCCCCGAGATCC             |
| 922                                                               | 964  | 486  | 1229 | CDS product myristylated tegument protein CIRC   | 922-964 9:06:02                             |
|                                                                   |      |      |      | CCCGGCCCTTCCCACCGCCGCCCTCGGCCGCGCGCCGCTCC        |                                             |
| 988                                                               | 1016 | 486  | 1229 | CDS product myristylated tegument protein CIRC   | 988-1016 6:03:01                            |
|                                                                   |      |      |      | CCGGCCCCGACGCACCTTCTGCCCCCACC                    |                                             |
| 1918                                                              | 1949 | 1658 | 2860 | CDS product multifunctional expression regulator | 1918-1949 6:03:01                           |
|                                                                   |      |      |      | GGGGCAGGTGGCGAGGCTTAGCCGGCGCGCGG                 |                                             |
| 2223                                                              | 2242 | 1658 | 2860 | CDS product multifunctional expression regulator | 2223-2242 4:01:01                           |
|                                                                   |      |      |      | GGTAGAGGTCGCGGCCGTGG                             |                                             |
| 2260                                                              | 2280 | 1658 | 2860 | CDS product multifunctional expression regulator | 2260-2280 4:01:01                           |
|                                                                   |      |      |      | GGTGACGCGGCGGCCCTCGGG                            |                                             |
| 2486                                                              | 2496 | 1658 | 2860 | CDS product multifunctional expression regulator | 2486-2496 4:01:01 CCCCCGCCGCC               |
| 2584                                                              | 2603 | 1658 | 2860 | CDS product multifunctional expression regulator | 2584-2603 4:01:01                           |
|                                                                   |      |      |      | CCTGCGCGGCCGCCGCGGCC                             |                                             |
| 2624                                                              | 2640 | 1658 | 2860 | CDS product multifunctional expression regulator | 2624-2640 4:01:01                           |

|                                      |      |      |      |                                                  |           |                                   |
|--------------------------------------|------|------|------|--------------------------------------------------|-----------|-----------------------------------|
| GGAGGTGCTTCGGCGGG                    |      |      |      |                                                  |           |                                   |
| 2672                                 | 2691 | 1658 | 2860 | CDS product multifunctional expression regulator | 2672-2691 | 5:02:01                           |
| GGCGGCTCGGCCGGCATCGG                 |      |      |      |                                                  |           |                                   |
| 2697                                 | 2710 | 1658 | 2860 | CDS product multifunctional expression regulator | 2697-2710 | 4:01:01                           |
| CCTCCGCGCCCTCC                       |      |      |      |                                                  |           |                                   |
| 3189                                 | 3218 | 3040 | 4038 | CDS product envelope glycoprotein K              | 3189-3218 | 6:03:01                           |
| CCCGCTCTCGCGCCGTCGCCGCCATCGCC        |      |      |      |                                                  |           |                                   |
| 3229                                 | 3241 | 3040 | 4038 | CDS product envelope glycoprotein K              | 3229-3241 | 4:01:01 CCTCCGCGCCGCC             |
| 3317                                 | 3345 | 3040 | 4038 | CDS product envelope glycoprotein K              | 3317-3345 | 5:02:01                           |
| GGTACAGCGGGTAGGCGCCGCGCAGGGG         |      |      |      |                                                  |           |                                   |
| 3355                                 | 3391 | 3040 | 4038 | CDS product envelope glycoprotein K              | 3355-3391 | 7:04:01                           |
| CCGACGCTGCCGGCCGCGCAATCCGCGCGCCGAGCC |      |      |      |                                                  |           |                                   |
| 3449                                 | 3462 | 3040 | 4038 | CDS product envelope glycoprotein K              | 3449-3462 | 4:01:01 GGGGGTCGAGGCGG            |
| 3672                                 | 3696 | 3040 | 4038 | CDS product envelope glycoprotein K              | 3672-3696 | 5:02:01 CCATGCCAGCAGGCCGCCGCGAGCC |
| 3807                                 | 3829 | 3040 | 4038 | CDS product envelope glycoprotein K              | 3807-3829 | 4:01:01 GGCGTGCCGGCACGGGGCGTCGG   |
| 4039                                 | 4063 | 4013 | 7237 | CDS product helicase-primase primase subunit     | 4039-4063 | 4:01:01                           |
| CCGCGCCGCGCGCCCCGAGAGATCC            |      |      |      |                                                  |           |                                   |
| 4066                                 | 4087 | 4013 | 7237 | CDS product helicase-primase primase subunit     | 4066-4087 | 4:01:01                           |
| GGTGAACACGGTACCGAGGCGG               |      |      |      |                                                  |           |                                   |
| 4276                                 | 4294 | 4013 | 7237 | CDS product helicase-primase primase subunit     | 4276-4294 | 4:01:01                           |
| GGCTTTGGCGGCCACGAGG                  |      |      |      |                                                  |           |                                   |
| 4400                                 | 4422 | 4013 | 7237 | CDS product helicase-primase primase subunit     | 4400-4422 | 4:01:01                           |
| CCACGGTCGCCGCCGTCGACGCC              |      |      |      |                                                  |           |                                   |

|      |      |      |      |                                                                                                            |           |          |                |
|------|------|------|------|------------------------------------------------------------------------------------------------------------|-----------|----------|----------------|
| 4468 | 4487 | 4013 | 7237 | CDS product helicase-primase primase subunit<br>GGCCGCGCGGTTGACGGCGG                                       | 4468-4487 | 4:01:01  |                |
| 4558 | 4616 | 4013 | 7237 | CDS product helicase-primase primase subunit<br>GGGTGGCGCGCGTGGAAGTGGAAGTGGTGCGGGTCGCGGTGCGCGGCGACGAAGGCGG | 4558-4616 | 11:08:02 |                |
| 4770 | 4792 | 4013 | 7237 | CDS product helicase-primase primase subunit<br>GGCTCATGGCCTCGGCGAAGGGG                                    | 4770-4792 | 4:01:01  |                |
| 4932 | 4963 | 4013 | 7237 | CDS product helicase-primase primase subunit<br>CCGCCGCGCTTCCCGCGCCCTCCGCGCCGCC                            | 4932-4963 | 7:04:01  |                |
| 5070 | 5091 | 4013 | 7237 | CDS product helicase-primase primase subunit<br>GGTCGGGCGCGGCCAGGACGG                                      | 5070-5091 | 5:02:01  |                |
| 5158 | 5194 | 4013 | 7237 | CDS product helicase-primase primase subunit<br>GGGGTGTGCGGGCCAGGCATCGGCGGCGATTTCGGGG                      | 5158-5194 | 6:03:01  |                |
| 5253 | 5281 | 4013 | 7237 | CDS product helicase-primase primase subunit<br>GGTCTCCGCGGGGAGGGGCGCTTGAGG                                | 5253-5281 | 6:03:01  |                |
| 5308 | 5324 | 4013 | 7237 | CDS product helicase-primase primase subunit<br>GGTTACGGCGAGGCGGG                                          | 5308-5324 | 4:01:01  |                |
| 5358 | 5414 | 4013 | 7237 | CDS product helicase-primase primase subunit<br>GGTCGCGCGGCGCGCCGGGCCCAGGCTCCGGCGGTCCGAGCGGCCGGCGGCACAGG   | 5358-5414 | 11:08:02 |                |
| 5373 | 5403 | 4013 | 7237 | CDS product helicase-primase primase subunit<br>CCGGGCCCAGGCTCCGGCGGTCCGAGCGGCC                            | 5373-5403 | 5:02:01  |                |
| 5485 | 5498 | 4013 | 7237 | CDS product helicase-primase primase subunit                                                               | 5485-5498 | 4:01:01  | GGCGGCGGCAGCGG |
| 5499 | 5518 | 4013 | 7237 | CDS product helicase-primase primase subunit<br>CCGCCGCAACCTCGACCGCC                                       | 5499-5518 | 5:02:01  |                |

|      |      |      |      |                                                                                        |           |         |
|------|------|------|------|----------------------------------------------------------------------------------------|-----------|---------|
| 5616 | 5639 | 4013 | 7237 | CDS product helicase-primase primase subunit<br>GGTAGACGGGCGTGGGCGCCGCGG               | 5616-5639 | 4:01:01 |
| 5634 | 5665 | 4013 | 7237 | CDS product helicase-primase primase subunit<br>CCGCGGTCCCGCGCGCCAAAGAGCCCGTCC         | 5634-5665 | 5:02:01 |
| 5759 | 5775 | 4013 | 7237 | CDS product helicase-primase primase subunit<br>CCGCCGTCCGGCGCGCC                      | 5759-5775 | 4:01:01 |
| 6151 | 6188 | 4013 | 7237 | CDS product helicase-primase primase subunit<br>GGGGGGCTCGGTGGCGGTGACGGCGCGCAGGTGCTCGG | 6151-6188 | 8:05:02 |
| 6297 | 6320 | 4013 | 7237 | CDS product helicase-primase primase subunit<br>GGCAGCGGACCTCGGCGAGGTCGG               | 6297-6320 | 5:02:01 |
| 6445 | 6481 | 4013 | 7237 | CDS product helicase-primase primase subunit<br>GGGGTTAGGCGGCGCGGCGACGGCGTACGTGGCCAGG  | 6445-6481 | 7:04:01 |
| 6493 | 6524 | 4013 | 7237 | CDS product helicase-primase primase subunit<br>GGCCTGCAGGTCGTAGGTAGCGGCGTCGCCGG       | 6493-6524 | 5:02:01 |
| 6682 | 6706 | 4013 | 7237 | CDS product helicase-primase primase subunit<br>GGCTAGGCCGCGGCGGCCGCCGGG               | 6682-6706 | 6:03:01 |
| 6766 | 6783 | 4013 | 7237 | CDS product helicase-primase primase subunit<br>GGTGCGGCCGGTGCGAGG                     | 6766-6783 | 4:01:01 |
| 6786 | 6805 | 4013 | 7237 | CDS product helicase-primase primase subunit<br>CCAGCTGCTCCGTGGCCACC                   | 6786-6805 | 4:01:01 |
| 6957 | 6980 | 4013 | 7237 | CDS product helicase-primase primase subunit<br>GGGCCAGGCGCGGGTCGCGGCGG                | 6957-6980 | 5:02:01 |
| 6986 | 7003 | 4013 | 7237 | CDS product helicase-primase primase subunit                                           | 6986-7003 | 4:01:01 |



|                                                                         |      |      |      |                                              |           |                                  |  |
|-------------------------------------------------------------------------|------|------|------|----------------------------------------------|-----------|----------------------------------|--|
| CCGCCCCGGCGGGCCGCCC                                                     |      |      |      |                                              |           |                                  |  |
| 7027                                                                    | 7051 | 4013 | 7237 | CDS product helicase-primase primase subunit | 7027-7051 | 5:02:01                          |  |
| CCGCGCATCCGCCAGCGCCAGCGCC                                               |      |      |      |                                              |           |                                  |  |
| 7124                                                                    | 7147 | 4013 | 7237 | CDS product helicase-primase primase subunit | 7124-7147 | 5:02:01                          |  |
| CCACGGCCGGGCTCCTCCTGGCCC                                                |      |      |      |                                              |           |                                  |  |
| 7186                                                                    | 7204 | 4013 | 7237 | CDS product helicase-primase primase subunit | 7186-7204 | 4:01:01                          |  |
| GGTGGCGTACAGGATTGG                                                      |      |      |      |                                              |           |                                  |  |
| 7248                                                                    | 7281 | 7236 | 7967 | CDS product tegument protein UL51            | 7248-7281 | 8:05:02                          |  |
| GGCTGGTCGGGTGGCTGTGCGGGCGGGCGGGGG                                       |      |      |      |                                              |           |                                  |  |
| 7399                                                                    | 7435 | 7236 | 7967 | CDS product tegument protein UL51            | 7399-7435 | 7:04:01                          |  |
| GGAGGACGTGGCGCGCTCGGCAGACGGCACGCGGCGG                                   |      |      |      |                                              |           |                                  |  |
| 7584                                                                    | 7597 | 7236 | 7967 | CDS product tegument protein UL51            | 7584-7597 | 4:01:01 CCTGCCTGGCCGCC           |  |
| 7618                                                                    | 7661 | 7236 | 7967 | CDS product tegument protein UL51            | 7618-7661 | 8:05:02                          |  |
| GGTGGGCGCTGTGGAGGGCACGACGGACAGCATGGTGGACCAGG                            |      |      |      |                                              |           |                                  |  |
| 7726                                                                    | 7769 | 7236 | 7967 | CDS product tegument protein UL51            | 7726-7769 | 9:06:02                          |  |
| GGGCATTCAGGCGCAGGGCGGGCGGGAGGCGGCGGCCAGGG                               |      |      |      |                                              |           |                                  |  |
| 7780                                                                    | 7802 | 7236 | 7967 | CDS product tegument protein UL51            | 7780-7802 | 4:01:01 GGCCGTTGGTGCCGAGGCTCGGG  |  |
| 7803                                                                    | 7875 | 7236 | 7967 | CDS product tegument protein UL51            | 7803-7875 | 13:10:03                         |  |
| CCCCGCCGCCCTGCCGCGGCAGCCGGCCGCTCGGCGCCGGTCGCCGTGTCTCCGGCACCGCCGGTGGCGCC |      |      |      |                                              |           |                                  |  |
| 7821                                                                    | 7844 | 7236 | 7967 | CDS product tegument protein UL51            | 7821-7844 | 4:01:01 GGCAGCCGGCCGCCTCGGCGCCGG |  |
| 7887                                                                    | 7907 | 7236 | 7967 | CDS product tegument protein UL51            | 7887-7907 | 5:02:01 CCGCCACAAAACCACTAGCC     |  |
| 7926                                                                    | 7945 | 7236 | 7967 | CDS product tegument protein UL51            | 7926-7945 | 5:02:01 CCGCCGCTTCTCCCCCGCC      |  |
| 8050                                                                    | 8076 | 8045 | 9022 | CDS product deoxyuridine triphosphatase      | 8050-8076 | 4:01:01                          |  |

|                                           |      |      |       |                                         |           |         |                         |
|-------------------------------------------|------|------|-------|-----------------------------------------|-----------|---------|-------------------------|
| CCCGGTGGACCCAAAGCCGCGCGGCC                |      |      |       |                                         |           |         |                         |
| 8130                                      | 8154 | 8045 | 9022  | CDS product deoxyuridine triphosphatase | 8130-8154 | 5:02:01 |                         |
| GGCGCGGGGCCCCAGGGCGGGCGG                  |      |      |       |                                         |           |         |                         |
| 8165                                      | 8205 | 8045 | 9022  | CDS product deoxyuridine triphosphatase | 8165-8205 | 7:04:01 |                         |
| GGGCTAGTTGGGAAGGGCTCGCGGTCGTTGAGGCCGGACGG |      |      |       |                                         |           |         |                         |
| 8304                                      | 8338 | 8045 | 9022  | CDS product deoxyuridine triphosphatase | 8304-8338 | 7:04:01 |                         |
| GGCAGGGCTCCCCGGGGGGCCAGGCTGTCGGCAGG       |      |      |       |                                         |           |         |                         |
| 8506                                      | 8529 | 8045 | 9022  | CDS product deoxyuridine triphosphatase | 8506-8529 | 4:01:01 | GGGGCGAACGTGGCAAAGAAGGG |
| 8575                                      | 8600 | 8045 | 9022  | CDS product deoxyuridine triphosphatase | 8575-8600 | 5:02:01 |                         |
| GGCGATGAGGCGAGGCAGCGTGGTGG                |      |      |       |                                         |           |         |                         |
| 8639                                      | 8664 | 8045 | 9022  | CDS product deoxyuridine triphosphatase | 8639-8664 | 5:02:01 |                         |
| GGGGGAGCGGCCGCTGCGGACTCGGG                |      |      |       |                                         |           |         |                         |
| 8719                                      | 8739 | 8045 | 9022  | CDS product deoxyuridine triphosphatase | 8719-8739 | 5:02:01 | GGCCACGGCTGGTGGGCGGGG   |
| 8925                                      | 8947 | 8045 | 9022  | CDS product deoxyuridine triphosphatase | 8925-8947 | 6:03:01 | CCAACCGCCAGGGGGCCGCCTCC |
| 9057                                      | 9090 | 8970 | 9260  | CDS product envelope glycoprotein N     | 9057-9090 | 6:03:01 |                         |
| GGCGCGAGGGGGCAATGGACTTTTGAGCGCAGG         |      |      |       |                                         |           |         |                         |
| 9238                                      | 9255 | 8970 | 9260  | CDS product envelope glycoprotein N     | 9238-9255 | 4:01:01 | GGAGTCGCGGGGGCGGGG      |
| 9576                                      | 9599 | 9384 | 10160 | CDS product tegument protein VP22       | 9576-9599 | 6:03:01 | CCGTCCAGCCCGCCGCCCGGGCC |
| 9638                                      | 9659 | 9384 | 10160 | CDS product tegument protein VP22       | 9638-9659 | 6:03:01 | CCCGCCGCCGCGCGGCCCGCC   |
| 9670                                      | 9690 | 9384 | 10160 | CDS product tegument protein VP22       | 9670-9690 | 4:01:01 | CCGGGCGTCCTCGCGCCCGCC   |
| 9699                                      | 9727 | 9384 | 10160 | CDS product tegument protein VP22       | 9699-9727 | 8:05:02 |                         |
| CCGCCGACCCGCCGCTCCTCCGGCCAGCC             |      |      |       |                                         |           |         |                         |
| 9734                                      | 9755 | 9384 | 10160 | CDS product tegument protein VP22       | 9734-9755 | 4:01:01 | GGGTCTCCGGCGGCGCCGGG    |

|                                                     |       |       |       |                                                   |             |                                 |
|-----------------------------------------------------|-------|-------|-------|---------------------------------------------------|-------------|---------------------------------|
| 9762                                                | 9793  | 9384  | 10160 | CDS product tegument protein VP22                 | 9762-9793   | 6:03:01                         |
| CCGTCGGTCCACCTCGACCTCGCGGCCCCC                      |       |       |       |                                                   |             |                                 |
| 10077                                               | 10099 | 9384  | 10160 | CDS product tegument protein VP22                 | 10077-10099 | 4:01:01 CCGCGCGGGCCCAGCGCCCCGCC |
| 10448                                               | 10474 | 10344 | 11792 | CDS product transactivating tegument protein VP16 | 10448-10474 | 6:03:01                         |
| CCGCCCCCGCGCCCGGCTCCCCTGGCC                         |       |       |       |                                                   |             |                                 |
| 10533                                               | 10556 | 10344 | 11792 | CDS product transactivating tegument protein VP16 | 10533-10556 | 5:02:01                         |
| GGGCCATGGAGCGGTGGAACGAGG                            |       |       |       |                                                   |             |                                 |
| 10654                                               | 10679 | 10344 | 11792 | CDS product transactivating tegument protein VP16 | 10654-10679 | 4:01:01                         |
| GGTGCCTGGGACGCGGAGCGCTTGG                           |       |       |       |                                                   |             |                                 |
| 10699                                               | 10723 | 10344 | 11792 | CDS product transactivating tegument protein VP16 | 10699-10723 | 6:03:01                         |
| CCAGCCGCTTCCCGACCGCCGGCC                            |       |       |       |                                                   |             |                                 |
| 10720                                               | 10763 | 10344 | 11792 | CDS product transactivating tegument protein VP16 | 10720-10763 | 8:05:02                         |
| GGCCTCGGAGGAGGGCCTCCCGGAGTATGTGGCCGGCGTACAGG        |       |       |       |                                                   |             |                                 |
| 10858                                               | 10898 | 10344 | 11792 | CDS product transactivating tegument protein VP16 | 10858-10898 | 8:05:02                         |
| GGCGGCGCGTGGCCGAGGCGCGGGCGGGCGGCCAGG                |       |       |       |                                                   |             |                                 |
| 10911                                               | 10930 | 10344 | 11792 | CDS product transactivating tegument protein VP16 | 10911-10930 | 5:02:01                         |
| GGCAGCTGGTGGCGGCGCGG                                |       |       |       |                                                   |             |                                 |
| 10942                                               | 10964 | 10344 | 11792 | CDS product transactivating tegument protein VP16 | 10942-10964 | 5:02:01                         |
| GGCGAGCCGGCTGGCGCGGCTGG                             |       |       |       |                                                   |             |                                 |
| 11088                                               | 11104 | 10344 | 11792 | CDS product transactivating tegument protein VP16 | 11088-11104 | 4:01:01                         |
| CCTGCCTGTTCCACCCC                                   |       |       |       |                                                   |             |                                 |
| 11120                                               | 11170 | 10344 | 11792 | CDS product transactivating tegument protein VP16 | 11120-11170 | 10:07:02                        |
| GGCGTCGTGGCGCTGGAGGACGGCTTCTTGGACGCGGCGGAGCTGCGGCGG |       |       |       |                                                   |             |                                 |

|                                                  |       |       |       |                                                   |                                             |
|--------------------------------------------------|-------|-------|-------|---------------------------------------------------|---------------------------------------------|
| 11206                                            | 11252 | 10344 | 11792 | CDS product transactivating tegument protein VP16 | 11206-11252 8:05:02                         |
| GGTCCGCGGGGCTGGTCGAGGTGAAGTGGGGCCTCTGGTGGAGG     |       |       |       |                                                   |                                             |
| 11335                                            | 11363 | 10344 | 11792 | CDS product transactivating tegument protein VP16 | 11335-11363 7:04:01                         |
| GGCCGGCGGGCGGCTGGCGCCGAGCGGG                     |       |       |       |                                                   |                                             |
| 11519                                            | 11557 | 10344 | 11792 | CDS product transactivating tegument protein VP16 | 11519-11557 7:04:01                         |
| CCTTCAGCCAAGGGCGCGCCCGGCCGAGTTGCCGCC             |       |       |       |                                                   |                                             |
| 11628                                            | 11670 | 10344 | 11792 | CDS product transactivating tegument protein VP16 | 11628-11670 7:04:01                         |
| CCTTGCCCTTAGCCGAGCCCGCGGCAGCCCTGGCCCCGGCCCC      |       |       |       |                                                   |                                             |
| 11682                                            | 11730 | 10344 | 11792 | CDS product transactivating tegument protein VP16 | 11682-11730 8:05:02                         |
| CCCCAGCCGAGCCCGCGGCGGCCGTCGCCGGCCAAGCCCGGCAAACCC |       |       |       |                                                   |                                             |
| 11986                                            | 12009 | 11963 | 14182 | CDS product tegument protein VP13/14              | 11986-12009 5:02:01 CCTGAGCGCCGCCGCGCGTCTCC |
| 12018                                            | 12049 | 11963 | 14182 | CDS product tegument protein VP13/14              | 12018-12049 5:02:01                         |
| CCGCACGCACCCGTTCCAGCGCCCTCTGCCC                  |       |       |       |                                                   |                                             |
| 12100                                            | 12140 | 11963 | 14182 | CDS product tegument protein VP13/14              | 12100-12140 7:04:01                         |
| CCGCGGGTCCGGCGCCCGCGGCCGTACTTCCAGCGGCCCCC        |       |       |       |                                                   |                                             |
| 12502                                            | 12515 | 11963 | 14182 | CDS product tegument protein VP13/14              | 12502-12515 5:02:01 GGCGGCGGGGGCGG          |
| 12645                                            | 12688 | 11963 | 14182 | CDS product tegument protein VP13/14              | 12645-12688 10:07:02                        |
| GGAGGCGGCCGCTGCGGCTGCGGGGAGAGGAGCGTGGTGGAGG      |       |       |       |                                                   |                                             |
| 12740                                            | 12762 | 11963 | 14182 | CDS product tegument protein VP13/14              | 12740-12762 5:02:01 GGATTTTGAGGGCCGGTGCGG   |
| 12842                                            | 12863 | 11963 | 14182 | CDS product tegument protein VP13/14              | 12842-12863 4:01:01 GGCGCGCTTGGGAGATGGCCGG  |
| 12893                                            | 12910 | 11963 | 14182 | CDS product tegument protein VP13/14              | 12893-12910 4:01:01 GGAGCACGGTGGACCCGG      |
| 12948                                            | 12975 | 11963 | 14182 | CDS product tegument protein VP13/14              | 12948-12975 5:02:01                         |
| GGGCACCCGGCCCCGGCTAGTGTGGCGG                     |       |       |       |                                                   |                                             |

|                                     |       |       |       |                                      |
|-------------------------------------|-------|-------|-------|--------------------------------------|
| 13010                               | 13025 | 11963 | 14182 | CDS product tegument protein VP13/14 |
| 13129                               | 13147 | 11963 | 14182 | CDS product tegument protein VP13/14 |
| 13150                               | 13169 | 11963 | 14182 | CDS product tegument protein VP13/14 |
| 13166                               | 13186 | 11963 | 14182 | CDS product tegument protein VP13/14 |
| 13587                               | 13603 | 11963 | 14182 | CDS product tegument protein VP13/14 |
| 13604                               | 13621 | 11963 | 14182 | CDS product tegument protein VP13/14 |
| 13819                               | 13842 | 11963 | 14182 | CDS product tegument protein VP13/14 |
| 13908                               | 13942 | 11963 | 14182 | CDS product tegument protein VP13/14 |
| GGTGCGCCCGGTGTTCTCGGTGGAGTTCCGGGAGG |       |       |       |                                      |
| 13998                               | 14020 | 11963 | 14182 | CDS product tegument protein VP13/14 |
| 14074                               | 14094 | 11963 | 14182 | CDS product tegument protein VP13/14 |
| 14103                               | 14125 | 11963 | 14182 | CDS product tegument protein VP13/14 |
| 14392                               | 14414 | 14314 | 16560 | CDS product tegument protein VP11/12 |
| 14396                               | 14424 | 14314 | 16560 | CDS product tegument protein VP11/12 |
| GGCCGCGCCCGTGGTGGCCTTGCAGGAGG       |       |       |       |                                      |
| 14507                               | 14532 | 14314 | 16560 | CDS product tegument protein VP11/12 |
| GGAGGCGCTGTTCTGTCTCGGACTCGG         |       |       |       |                                      |
| 14584                               | 14603 | 14314 | 16560 | CDS product tegument protein VP11/12 |
| 14691                               | 14721 | 14314 | 16560 | CDS product tegument protein VP11/12 |
| GGCGCGGCCGCGCGCGCGGCGATGGAGCAGG     |       |       |       |                                      |
| 15039                               | 15058 | 14314 | 16560 | CDS product tegument protein VP11/12 |
| 15134                               | 15156 | 14314 | 16560 | CDS product tegument protein VP11/12 |
| 15259                               | 15282 | 14314 | 16560 | CDS product tegument protein VP11/12 |

|             |         |                          |
|-------------|---------|--------------------------|
| 13010-13025 | 5:02:01 | GGCTGGGGGTGGGGGG         |
| 13129-13147 | 4:01:01 | GGCCGGGGCGCGCGGGCGG      |
| 13150-13169 | 5:02:01 | CCGCGCCGCCTGCCGCGGCC     |
| 13166-13186 | 5:02:01 | GGCCGGCGGTGGGCTGCTGG     |
| 13587-13603 | 4:01:01 | GGAGACGGTGGACTCGG        |
| 13604-13621 | 4:01:01 | CCACCTTCCAAGAGGCC        |
| 13819-13842 | 5:02:01 | GGCGCAGCGGTGTACGGGGGCCGG |
| 13908-13942 | 6:03:01 |                          |
|             |         |                          |
| 13998-14020 | 5:02:01 | GGCCGGCAAGCGCGGGTCATGG   |
| 14074-14094 | 4:01:01 | GGTTCGCGGCCGGTGTCTGGG    |
| 14103-14125 | 5:02:01 | GGACATCGCGGAGCGCTGGCGG   |
| 14392-14414 | 4:01:01 | CCACGGCCGCGCCGTGGTGGCC   |
| 14396-14424 | 6:03:01 |                          |
|             |         |                          |
| 14507-14532 | 5:02:01 |                          |
|             |         |                          |
| 14584-14603 | 4:01:01 | GGGTGCTGGCGGGCGCGGG      |
| 14691-14721 | 7:04:01 |                          |
|             |         |                          |
| 15039-15058 | 4:01:01 | CCGCGCGAGCCGCGCCGCC      |
| 15134-15156 | 5:02:01 | GGCCCTGACGGCGCGGTGCTGG   |
| 15259-15282 | 5:02:01 | CCGTACACCACCACCTGCAGTACC |

|       |       |       |       |                                                                      |                      |                      |
|-------|-------|-------|-------|----------------------------------------------------------------------|----------------------|----------------------|
| 15402 | 15419 | 14314 | 16560 | CDS product tegument protein VP11/12                                 | 15402-15419 4:01:01  | CCGACCATGACTTCCGCC   |
| 15424 | 15455 | 14314 | 16560 | CDS product tegument protein VP11/12                                 | 15424-15455 6:03:01  |                      |
|       |       |       |       | GGGCGGCCCTGGAGCGCGGCACGGCGAGCTGG                                     |                      |                      |
| 15535 | 15567 | 14314 | 16560 | CDS product tegument protein VP11/12                                 | 15535-15567 6:03:01  |                      |
|       |       |       |       | GGCTCGGCGGGAGCCGCGGGCTGCTGGCGCCCG                                    |                      |                      |
| 15579 | 15604 | 14314 | 16560 | CDS product tegument protein VP11/12                                 | 15579-15604 5:02:01  |                      |
|       |       |       |       | CCGTCGGGCCGCGGCCGCCGCTGCCC                                           |                      |                      |
| 15616 | 15661 | 14314 | 16560 | CDS product tegument protein VP11/12                                 | 15616-15661 10:07:02 |                      |
|       |       |       |       | CCGCGCGCCCTTGCCAGCCTGCCGGCCGCGGCCGCCGCCCTCC                          |                      |                      |
| 15662 | 15688 | 14314 | 16560 | CDS product tegument protein VP11/12                                 | 15662-15688 5:02:01  |                      |
|       |       |       |       | GGGCTCGGGCTCGGGCTCGGGCTCGGG                                          |                      |                      |
| 15817 | 15831 | 14314 | 16560 | CDS product tegument protein VP11/12                                 | 15817-15831 5:02:01  | GGCGGAGGCGGCGG       |
| 15929 | 15968 | 14314 | 16560 | CDS product tegument protein VP11/12                                 | 15929-15968 7:04:01  |                      |
|       |       |       |       | CCCCATGCCTGCCCCGCGCCCCGCGGTGGCCGCGGCGCC                              |                      |                      |
| 15990 | 16028 | 14314 | 16560 | CDS product tegument protein VP11/12                                 | 15990-16028 7:04:01  |                      |
|       |       |       |       | CCCATGCCTGCCCCGCGCCCCGCGGCGGCCGCGGCGCC                               |                      |                      |
| 16049 | 16088 | 14314 | 16560 | CDS product tegument protein VP11/12                                 | 16049-16088 7:04:01  |                      |
|       |       |       |       | CCCCATGCCTGCCCCGCGCCCCGCGGCGGCCGCGGCGCC                              |                      |                      |
| 16145 | 16164 | 14314 | 16560 | CDS product tegument protein VP11/12                                 | 16145-16164 4:01:01  | GGACGAGGGCAAGGACGAGG |
| 16177 | 16208 | 14314 | 16560 | CDS product tegument protein VP11/12                                 | 16177-16208 5:02:01  |                      |
|       |       |       |       | CCGGGGCGACCGCCCGTTGGCCGCGGACCCC                                      |                      |                      |
| 16244 | 16314 | 14314 | 16560 | CDS product tegument protein VP11/12                                 | 16244-16314 12:09:03 |                      |
|       |       |       |       | CCTCCGCGTCCCGGCTCGGCCCCGGCCCCGGCCCCGGCCCCGTGACCGAGCGCCGGGTAATCCAACCC |                      |                      |

|                                     |       |       |       |                                      |             |         |                             |
|-------------------------------------|-------|-------|-------|--------------------------------------|-------------|---------|-----------------------------|
| 16256                               | 16281 | 14314 | 16560 | CDS product tegument protein VP11/12 | 16256-16281 | 5:02:01 |                             |
| GGCCTCGGCCCCGGCCCCGGCCCCGG          |       |       |       |                                      |             |         |                             |
| 16334                               | 16368 | 14314 | 16560 | CDS product tegument protein VP11/12 | 16334-16368 | 5:02:01 |                             |
| CCCTCGGCTCCGCGCCCTAGACGACCGGCACGGCC |       |       |       |                                      |             |         |                             |
| 16360                               | 16390 | 14314 | 16560 | CDS product tegument protein VP11/12 | 16360-16390 | 7:04:01 |                             |
| GGCACGGCCTGGAGGCGCTGGCGGCTGCCGG     |       |       |       |                                      |             |         |                             |
| 16387                               | 16416 | 14314 | 16560 | CDS product tegument protein VP11/12 | 16387-16416 | 5:02:01 |                             |
| CCGGTGCCGCTCACACCGCGCGCCACAACC      |       |       |       |                                      |             |         |                             |
| 16528                               | 16545 | 14314 | 16560 | CDS product tegument protein VP11/12 | 16528-16545 | 4:01:01 | GGCCTGAGGTGGAGAGGG          |
| 16820                               | 16853 | 16683 | 18209 | CDS product envelope glycoprotein C  | 16820-16853 | 6:03:01 |                             |
| GGCGGTGCGGAGAACTCGGGCAGCGGTGCCGGG   |       |       |       |                                      |             |         |                             |
| 17078                               | 17098 | 16683 | 18209 | CDS product envelope glycoprotein C  | 17078-17098 | 5:02:01 | GGGCGGGCGGTAAACGGCCGG       |
| 17164                               | 17185 | 16683 | 18209 | CDS product envelope glycoprotein C  | 17164-17185 | 6:03:01 | GGTTGGGCGGGTGGGCGGTTGG      |
| 18446                               | 18472 | 18388 | 19524 | CDS product envelope protein UL43    | 18446-18472 | 5:02:01 | CCTTGGCCACGTGCGCCGCGGCCAGCC |
| 18481                               | 18502 | 18388 | 19524 | CDS product envelope protein UL43    | 18481-18502 | 4:01:01 | CCGCGCCCGCAGCGCCGACCC       |
| 18512                               | 18540 | 18388 | 19524 | CDS product envelope protein UL43    | 18512-18540 | 5:02:01 |                             |
| CCACCAGCGTGCCCGCGGCTGCCGAGGCC       |       |       |       |                                      |             |         |                             |
| 18556                               | 18569 | 18388 | 19524 | CDS product envelope protein UL43    | 18556-18569 | 4:01:01 | CCGCCGTCCGCGCC              |
| 18726                               | 18749 | 18388 | 19524 | CDS product envelope protein UL43    | 18726-18749 | 5:02:01 | CCAGCGCCACCGCCCTCGAGCCC     |
| 18760                               | 18783 | 18388 | 19524 | CDS product envelope protein UL43    | 18760-18783 | 5:02:01 | CCCGGGGCCAGAGCGCCGCCGCC     |
| 18786                               | 18799 | 18388 | 19524 | CDS product envelope protein UL43    | 18786-18799 | 4:01:01 | GGCTAAGGCGGCGG              |
| 18908                               | 18934 | 18388 | 19524 | CDS product envelope protein UL43    | 18908-18934 | 5:02:01 | CCAGAGTCCGAGCGCCGCTACCGCC   |
| 18959                               | 18978 | 18388 | 19524 | CDS product envelope protein UL43    | 18959-18978 | 4:01:01 | CCAGCGCCCGCGGGCGTCC         |

|                                                                    |       |       |       |                                                 |                                           |
|--------------------------------------------------------------------|-------|-------|-------|-------------------------------------------------|-------------------------------------------|
| 18992                                                              | 19061 | 18388 | 19524 | CDS product envelope protein UL43               | 18992-19061 11:08:02                      |
| CCAGCGCGGCCGCGCGCCCGCGCGCCAGCGCCTCGGGCGCGCGCCCCAGCGCCCGGCCGAAAGGCC |       |       |       |                                                 |                                           |
| 19209                                                              | 19237 | 18388 | 19524 | CDS product envelope protein UL43               | 19209-19237 6:03:01                       |
| GGCGGGGCGGGGTCTGTGGCCCAGACGG                                       |       |       |       |                                                 |                                           |
| 19397                                                              | 19418 | 18388 | 19524 | CDS product envelope protein UL43               | 19397-19418 5:02:01 CCAGGGCCGCCCATCAAGCC  |
| 19429                                                              | 19449 | 18388 | 19524 | CDS product envelope protein UL43               | 19429-19449 4:01:01 CCCATGGCCACCAGCGCGCCC |
| 19487                                                              | 19507 | 18388 | 19524 | CDS product envelope protein UL43               | 19487-19507 4:01:01 CCCCCGCGCAGCCGCTCACCC |
| 19609                                                              | 19635 | 19597 | 20823 | CDS product DNA polymerase processivity subunit | 19609-19635 6:03:01                       |
| CCCCCTCCCCGCCCCGATCCGGGCCC                                         |       |       |       |                                                 |                                           |
| 19642                                                              | 19670 | 19597 | 20823 | CDS product DNA polymerase processivity subunit | 19642-19670 5:02:01                       |
| GGGCCCCGGGCGCCGCGTCGGCGCGCGG                                       |       |       |       |                                                 |                                           |
| 19750                                                              | 19769 | 19597 | 20823 | CDS product DNA polymerase processivity subunit | 19750-19769 5:02:01                       |
| GGTTGGCCGGACGCGGCGGG                                               |       |       |       |                                                 |                                           |
| 19779                                                              | 19801 | 19597 | 20823 | CDS product DNA polymerase processivity subunit | 19779-19801 5:02:01                       |
| GGGAAGCGGGGTGCGGGCTCGG                                             |       |       |       |                                                 |                                           |
| 19821                                                              | 19848 | 19597 | 20823 | CDS product DNA polymerase processivity subunit | 19821-19848 9:06:02                       |
| GGCGGAGGCGGTGGCGGTGGCGGGGCGG                                       |       |       |       |                                                 |                                           |
| 19902                                                              | 19923 | 19597 | 20823 | CDS product DNA polymerase processivity subunit | 19902-19923 5:02:01                       |
| GGCGGCGCTGGCGGGCGCGAGG                                             |       |       |       |                                                 |                                           |
| 19945                                                              | 19962 | 19597 | 20823 | CDS product DNA polymerase processivity subunit | 19945-19962 5:02:01                       |
| CCGCCGACCTGCCGACC                                                  |       |       |       |                                                 |                                           |
| 20054                                                              | 20070 | 19597 | 20823 | CDS product DNA polymerase processivity subunit | 20054-20070 4:01:01                       |
| CCCTGCGGCCGCCGCC                                                   |       |       |       |                                                 |                                           |



|                                |       |       |       |                                                 |                                        |
|--------------------------------|-------|-------|-------|-------------------------------------------------|----------------------------------------|
| 20184                          | 20214 | 19597 | 20823 | CDS product DNA polymerase processivity subunit | 20184-20214 5:02:01                    |
| GGACTCGGCGCTCAGGCAACGGGCGGCCGG |       |       |       |                                                 |                                        |
| 20540                          | 20560 | 19597 | 20823 | CDS product DNA polymerase processivity subunit | 20540-20560 5:02:01                    |
| GGGCGGGGCCCCACTGGAAGG          |       |       |       |                                                 |                                        |
| 20667                          | 20692 | 19597 | 20823 | CDS product DNA polymerase processivity subunit | 20667-20692 4:01:01                    |
| GGGCCAAAGGGGCTCAGCAGGGCGG      |       |       |       |                                                 |                                        |
| 20757                          | 20779 | 19597 | 20823 | CDS product DNA polymerase processivity subunit | 20757-20779 5:02:01                    |
| GGACAGACCGGCGGTGAGGCGGG        |       |       |       |                                                 |                                        |
| 21125                          | 21140 | 21068 | 22447 | CDS product tegument host shutoff protein       | 21125-21140 4:01:01 CCATCACCACGCCGCC   |
| 21312                          | 21336 | 21068 | 22447 | CDS product tegument host shutoff protein       | 21312-21336 4:01:01                    |
| GGACCGCGGCATCCACGGGGACCGG      |       |       |       |                                                 |                                        |
| 21315                          | 21342 | 21068 | 22447 | CDS product tegument host shutoff protein       | 21315-21342 4:01:01                    |
| CCGCGGCATCCACGGGGACCGGCGGCC    |       |       |       |                                                 |                                        |
| 21388                          | 21411 | 21068 | 22447 | CDS product tegument host shutoff protein       | 21388-21411 5:02:01                    |
| GGCGGCTCGGGCCGCTCGGGCGG        |       |       |       |                                                 |                                        |
| 21435                          | 21452 | 21068 | 22447 | CDS product tegument host shutoff protein       | 21435-21452 4:01:01 GGAGGACGAGGTGCTGGG |
| 21504                          | 21520 | 21068 | 22447 | CDS product tegument host shutoff protein       | 21504-21520 4:01:01 GGAGGCAACGGCGAAGG  |
| 21540                          | 21556 | 21068 | 22447 | CDS product tegument host shutoff protein       | 21540-21556 4:01:01 GGCGGGGCCGCGGGG    |
| 21876                          | 21903 | 21068 | 22447 | CDS product tegument host shutoff protein       | 21876-21903 6:03:01                    |
| GGTGCAGCAGGTGTTGCGGGGCTGCGG    |       |       |       |                                                 |                                        |
| 21911                          | 21933 | 21068 | 22447 | CDS product tegument host shutoff protein       | 21911-21933 4:01:01                    |
| CCGAGGCCGAGCCCGCGACTACC        |       |       |       |                                                 |                                        |
| 21976                          | 22005 | 21068 | 22447 | CDS product tegument host shutoff protein       | 21976-22005 5:02:01                    |

|                                                                           |       |       |       |                                                |                                  |
|---------------------------------------------------------------------------|-------|-------|-------|------------------------------------------------|----------------------------------|
| GGTCGTCCGGGCGCTGGGCCGCGCGCCGG                                             |       |       |       |                                                |                                  |
| 21994                                                                     | 22014 | 21068 | 22447 | CDS product tegument host shutoff protein      | 21994-22014 4:01:01              |
| CCGCGGCGCCGGTTGCCGCC                                                      |       |       |       |                                                |                                  |
| 22356                                                                     | 22377 | 21068 | 22447 | CDS product tegument host shutoff protein      | 22356-22377 5:02:01              |
| CCCCACTCCACCCCATTGCG                                                      |       |       |       |                                                |                                  |
| 22397                                                                     | 22431 | 21068 | 22447 | CDS product tegument host shutoff protein      | 22397-22431 5:02:01              |
| GGGACGAGGCCCCCGGGGCCGGGTCGCGACGG                                          |       |       |       |                                                |                                  |
| 22642                                                                     | 22674 | 22563 | 23507 | CDS product ribonucleotide reductase subunit 2 | 22642-22674 6:03:01              |
| GGGCCAAAGGAAAATCGGTCCAGGAGGCGGGG                                          |       |       |       |                                                |                                  |
| 22837                                                                     | 22849 | 22563 | 23507 | CDS product ribonucleotide reductase subunit 2 | 22837-22849 4:01:01 GGGCCGCGGCGG |
| 22915                                                                     | 22937 | 22563 | 23507 | CDS product ribonucleotide reductase subunit 2 | 22915-22937 4:01:01              |
| GGCTGATGAGGTCGTTGTTTGG                                                    |       |       |       |                                                |                                  |
| 22954                                                                     | 22974 | 22563 | 23507 | CDS product ribonucleotide reductase subunit 2 | 22954-22974 4:01:01              |
| GGTTGTGGGTGCGCAGGTAGG                                                     |       |       |       |                                                |                                  |
| 23041                                                                     | 23117 | 22563 | 23507 | CDS product ribonucleotide reductase subunit 2 | 23041-23117 13:10:03             |
| CCACCGACTCTGCCGCGCCACGCGCGCTCGAGCCAGTCCACCTTGCGCCGACCGCCGGGTCGCCAGGGCGCCC |       |       |       |                                                |                                  |
| 23284                                                                     | 23303 | 22563 | 23507 | CDS product ribonucleotide reductase subunit 2 | 23284-23303 4:01:01              |
| GGTCATCGGCGGCCGAGAGG                                                      |       |       |       |                                                |                                  |
| 23340                                                                     | 23360 | 22563 | 23507 | CDS product ribonucleotide reductase subunit 2 | 23340-23360 4:01:01              |
| CCGCTGAGCCGCGCCACGTCC                                                     |       |       |       |                                                |                                  |
| 23485                                                                     | 23504 | 22563 | 23507 | CDS product ribonucleotide reductase subunit 2 | 23485-23504 5:02:01              |
| CCGCGTCCGCGCCTCGGCC                                                       |       |       |       |                                                |                                  |
| 23730                                                                     | 23768 | 23526 | 25889 | CDS product ribonucleotide reductase subunit 1 | 23730-23768 6:03:01              |

|                                        |       |       |       |                                                |                                    |
|----------------------------------------|-------|-------|-------|------------------------------------------------|------------------------------------|
| GGGGCGCGGTCGGCGCAGAGGTCGATCAGGCGCTCTTG |       |       |       |                                                |                                    |
| 23795                                  | 23819 | 23526 | 25889 | CDS product ribonucleotide reductase subunit 1 | 23795-23819 4:01:01                |
| GGCCAGCGGATGCCCCGGGCGGAGG              |       |       |       |                                                |                                    |
| 23997                                  | 24017 | 23526 | 25889 | CDS product ribonucleotide reductase subunit 1 | 23997-24017 4:01:01                |
| CCCTCGCTGCCCTCCGTCACC                  |       |       |       |                                                |                                    |
| 24026                                  | 24045 | 23526 | 25889 | CDS product ribonucleotide reductase subunit 1 | 24026-24045 4:01:01                |
| GGACACGGTCGGCATAAGGG                   |       |       |       |                                                |                                    |
| 24218                                  | 24255 | 23526 | 25889 | CDS product ribonucleotide reductase subunit 1 | 24218-24255 7:04:01                |
| GGCGCTGGTGGCCATGACGGCCAGGAGCAGGCGCTCGG |       |       |       |                                                |                                    |
| 24428                                  | 24459 | 23526 | 25889 | CDS product ribonucleotide reductase subunit 1 | 24428-24459 6:03:01                |
| GGCGGCCGTGGCGGCCCGCTGGACAGAGCGG        |       |       |       |                                                |                                    |
| 24760                                  | 24783 | 23526 | 25889 | CDS product ribonucleotide reductase subunit 1 | 24760-24783 4:01:01                |
| CCGTAAAGGCCGGGCCGTGCAGCC               |       |       |       |                                                |                                    |
| 24835                                  | 24860 | 23526 | 25889 | CDS product ribonucleotide reductase subunit 1 | 24835-24860 5:02:01                |
| GGCCTTCGAGGTGGGCGAGGTAGCGG             |       |       |       |                                                |                                    |
| 25168                                  | 25181 | 23526 | 25889 | CDS product ribonucleotide reductase subunit 1 | 25168-25181 4:01:01 CCTCCACGGCCTCC |
| 25352                                  | 25377 | 23526 | 25889 | CDS product ribonucleotide reductase subunit 1 | 25352-25377 4:01:01                |
| CCCAAAGGCCGGCTCCCGCATCGTCC             |       |       |       |                                                |                                    |
| 25382                                  | 25395 | 23526 | 25889 | CDS product ribonucleotide reductase subunit 1 | 25382-25395 4:01:01 GGCGGCGGTGCGGG |
| 25769                                  | 25791 | 23526 | 25889 | CDS product ribonucleotide reductase subunit 1 | 25769-25791 7:04:01                |
| GGCGGCGGGCGGCGGCGGCACGG                |       |       |       |                                                |                                    |
| 25794                                  | 25817 | 23526 | 25889 | CDS product ribonucleotide reductase subunit 1 | 25794-25817 4:01:01                |
| CCGCAGCCCAGCTGCGCCATTCC                |       |       |       |                                                |                                    |

|                                         |       |       |       |                                      |             |                                    |
|-----------------------------------------|-------|-------|-------|--------------------------------------|-------------|------------------------------------|
| 26244                                   | 26275 | 26231 | 27655 | CDS product capsid triplex subunit 1 | 26244-26275 | 6:03:01                            |
| CCACCCAGTCCCCGGTTCCCCACACCAAGCCC        |       |       |       |                                      |             |                                    |
| 26470                                   | 26491 | 26231 | 27655 | CDS product capsid triplex subunit 1 | 26470-26491 | 4:01:01 GGGGCAGCGGTAGCCGCGCGG      |
| 26552                                   | 26564 | 26231 | 27655 | CDS product capsid triplex subunit 1 | 26552-26564 | 4:01:01 CCCGCCGTCCCCC              |
| 26885                                   | 26905 | 26231 | 27655 | CDS product capsid triplex subunit 1 | 26885-26905 | 4:01:01 CCGCCCAGGCACCCGAGTGCC      |
| 26912                                   | 26948 | 26231 | 27655 | CDS product capsid triplex subunit 1 | 26912-26948 | 6:03:01                            |
| GGGAACGCGCGGCAGCGGATCATGGCCTGCAGGCAGG   |       |       |       |                                      |             |                                    |
| 26979                                   | 27004 | 26231 | 27655 | CDS product capsid triplex subunit 1 | 26979-27004 | 5:02:01                            |
| GGCGGTCGCCGAGTTGAAATGAGG                |       |       |       |                                      |             |                                    |
| 27046                                   | 27059 | 26231 | 27655 | CDS product capsid triplex subunit 1 | 27046-27059 | 4:01:01 GGCGGCGCAGGCGG             |
| 27322                                   | 27348 | 26231 | 27655 | CDS product capsid triplex subunit 1 | 27322-27348 | 6:03:01                            |
| GGGCGAGAGGACGGCGGTGCCGGCGGG             |       |       |       |                                      |             |                                    |
| 27458                                   | 27499 | 26231 | 27655 | CDS product capsid triplex subunit 1 | 27458-27499 | 7:04:01                            |
| CCCCGGGGTGCCCGCCGCGAGCGCCCAACCGCAGGCGCC |       |       |       |                                      |             |                                    |
| 27517                                   | 27539 | 26231 | 27655 | CDS product capsid triplex subunit 1 | 27517-27539 | 5:02:01 GGCTTCGGCGGCAGAGGCCTCGG    |
| 27534                                   | 27547 | 26231 | 27655 | CDS product capsid triplex subunit 1 | 27534-27547 | 4:01:01 CCTCGGCCGCCGCC             |
| 27550                                   | 27562 | 26231 | 27655 | CDS product capsid triplex subunit 1 | 27550-27562 | 4:01:01 GGCGGCGGCGGGG              |
| 27575                                   | 27592 | 26231 | 27655 | CDS product capsid triplex subunit 1 | 27575-27592 | 5:02:01 GGCGGCGGCGGCTGGG           |
| 27913                                   | 27939 | 27871 | 30945 | CDS product tegument protein UL37    | 27913-27939 | 6:03:01 GGTTGGATGGCGAGGTCGCCGCCCGG |
| 27950                                   | 27972 | 27871 | 30945 | CDS product tegument protein UL37    | 27950-27972 | 5:02:01 GGAGGCCAGGCGGCCGTCTCGG     |
| 27977                                   | 27995 | 27871 | 30945 | CDS product tegument protein UL37    | 27977-27995 | 4:01:01 CCTCCTCGCGTCCGGGCCC        |
| 28160                                   | 28179 | 27871 | 30945 | CDS product tegument protein UL37    | 28160-28179 | 4:01:01 GGCCGGCGTTCCGGACCTGG       |
| 28199                                   | 28221 | 27871 | 30945 | CDS product tegument protein UL37    | 28199-28221 | 4:01:01 GGCGCCGTTGGGTTACCTGGCGG    |

|                                   |       |       |       |                                   |
|-----------------------------------|-------|-------|-------|-----------------------------------|
| 28214                             | 28238 | 27871 | 30945 | CDS product tegument protein UL37 |
| 28241                             | 28257 | 27871 | 30945 | CDS product tegument protein UL37 |
| 28274                             | 28287 | 27871 | 30945 | CDS product tegument protein UL37 |
| 28319                             | 28345 | 27871 | 30945 | CDS product tegument protein UL37 |
| 28346                             | 28369 | 27871 | 30945 | CDS product tegument protein UL37 |
| 28513                             | 28534 | 27871 | 30945 | CDS product tegument protein UL37 |
| 28598                             | 28632 | 27871 | 30945 | CDS product tegument protein UL37 |
| GGACACGGCGCCGGGCTGGCTGAGGCGTTGCGG |       |       |       |                                   |
| 28721                             | 28740 | 27871 | 30945 | CDS product tegument protein UL37 |
| 28854                             | 28868 | 27871 | 30945 | CDS product tegument protein UL37 |
| 28963                             | 28979 | 27871 | 30945 | CDS product tegument protein UL37 |
| 28982                             | 29003 | 27871 | 30945 | CDS product tegument protein UL37 |
| 29093                             | 29122 | 27871 | 30945 | CDS product tegument protein UL37 |
| GGCGGTGGGCTGCGTGGCGGTGGCGGGCGG    |       |       |       |                                   |
| 29321                             | 29349 | 27871 | 30945 | CDS product tegument protein UL37 |
| GGCGCTGGCGGCAGAGCCGCGGCCGCGG      |       |       |       |                                   |
| 29484                             | 29513 | 27871 | 30945 | CDS product tegument protein UL37 |
| CCGCCCCGCGCCGAAGCGCCGCCCGCGGCC    |       |       |       |                                   |
| 29531                             | 29550 | 27871 | 30945 | CDS product tegument protein UL37 |
| 29627                             | 29657 | 27871 | 30945 | CDS product tegument protein UL37 |
| CCCGGCCCTTTGCGCCCCACTTCGCGCGCGCC  |       |       |       |                                   |
| 29666                             | 29685 | 27871 | 30945 | CDS product tegument protein UL37 |
| 29754                             | 29769 | 27871 | 30945 | CDS product tegument protein UL37 |

|             |         |                            |
|-------------|---------|----------------------------|
| 28214-28238 | 4:01:01 | CCTGGCGGCCGCGCGCCTGCGCGCC  |
| 28241-28257 | 4:01:01 | GGCGGCGTTCGGCCCGG          |
| 28274-28287 | 4:01:01 | GGTGGTGGAGTGGG             |
| 28319-28345 | 4:01:01 | GGACGCGCGTGCGTGGGTGTGTTAGG |
| 28346-28369 | 4:01:01 | CCCCGACCCTGCGTGCCGCTCGCC   |
| 28513-28534 | 4:01:01 | CCGCGGACCCGCGGCGCCGCC      |
| 28598-28632 | 6:03:01 |                            |
|             |         |                            |
| 28721-28740 | 4:01:01 | GGCGGCGCTGGCCTACCGGG       |
| 28854-28868 | 4:01:01 | GGCGGCGTGGTGCGG            |
| 28963-28979 | 4:01:01 | CCACGCCAGACCAAGCC          |
| 28982-29003 | 4:01:01 | GGAGACGCTGGCCGCGCGGGG      |
| 29093-29122 | 8:05:02 |                            |
|             |         |                            |
| 29321-29349 | 6:03:01 |                            |
|             |         |                            |
| 29484-29513 | 6:03:01 |                            |
|             |         |                            |
| 29531-29550 | 4:01:01 | GGCCGCGGGCGGCGCTTCGG       |
| 29627-29657 | 6:03:01 |                            |
|             |         |                            |
| 29666-29685 | 4:01:01 | GGACGTGCTGGTGGCTGCGG       |
| 29754-29769 | 4:01:01 | GGCGGGGAGCGGTGG            |

29801 29822 27871 30945 CDS product tegument protein UL37  
 29945 29965 27871 30945 CDS product tegument protein UL37  
 30093 30112 27871 30945 CDS product tegument protein UL37  
 30197 30238 27871 30945 CDS product tegument protein UL37

GGGTGCGTGGCGCTCGGCGGACCTGGCCGACGCGGTGCGCGG

30247 30269 27871 30945 CDS product tegument protein UL37  
 30363 30375 27871 30945 CDS product tegument protein UL37  
 30398 30451 27871 30945 CDS product tegument protein UL37

GGCGGGCCACTCGGCGCTGGTGGGGCGCAGACGGCGCTGGCGCTGGCCGCCG

30461 30482 27871 30945 CDS product tegument protein UL37  
 30592 30624 27871 30945 CDS product tegument protein UL37

GGCTCCGCGCGTCTGGGACGAGGTCCAGGAGG

30686 30753 27871 30945 CDS product tegument protein UL37

GGCGGTGCTGGCGCTGTTGGAGGGCTACCCGGAGGTTCGGGGAGACGAGGGCAGCCCGCGCTCCTGG

30764 30784 27871 30945 CDS product tegument protein UL37  
 30832 30848 27871 30945 CDS product tegument protein UL37  
 30851 30875 27871 30945 CDS product tegument protein UL37  
 30919 30939 27871 30945 CDS product tegument protein UL37  
 31125 31150 31040 40651 CDS product large tegument protein  
 31181 31199 31040 40651 CDS product large tegument protein  
 31305 31327 31040 40651 CDS product large tegument protein  
 31329 31347 31040 40651 CDS product large tegument protein  
 31479 31511 31040 40651 CDS product large tegument protein

29801-29822 5:02:01 GGCCCTGGCGGCCGGGCTCTGG  
 29945-29965 4:01:01 CCCGCCTGTGCCCCGCGCGCCC  
 30093-30112 5:02:01 GGCGCGGTGGCGCGGCTGGG  
 30197-30238 7:04:01

30247-30269 4:01:01 CCGAAGCCGCGCGCGCCCGGGCC  
 30363-30375 4:01:01 GGCGGCGGGCTGG  
 30398-30451 9:06:02

30461-30482 5:02:01 GGCGGGCGCGGAGGCGCCGGG  
 30592-30624 6:03:01

30686-30753 11:08:02

30764-30784 4:01:01 GGACGTGGCCGACTGGGCGGG  
 30832-30848 4:01:01 CCGCCGCGTCTGCCGCC  
 30851-30875 5:02:01 GGCAAACACGGCGCGGGGCCGTGG  
 30919-30939 4:01:01 CCAGTCGCCCCGCCGAGCCC  
 31125-31150 5:02:01 GGCGCTGGGGCCGGGACGCGGTGG  
 31181-31199 4:01:01 GGCTGGCCTTCGCGGGCGG  
 31305-31327 5:02:01 CCTGCCAAACCGCATCACCGACC  
 31329-31347 4:01:01 GGCGGGCGCGGGGAGCGGG  
 31479-31511 5:02:01

|                                                                 |       |       |       |                                    |                                              |
|-----------------------------------------------------------------|-------|-------|-------|------------------------------------|----------------------------------------------|
| GGCGCTGGTGATCGTGGGCGCCATGGGCGTCGG                               |       |       |       |                                    |                                              |
| 31803                                                           | 31839 | 31040 | 40651 | CDS product large tegument protein | 31803-31839 6:03:01                          |
| CCCGCGCGCGCCGGCCAACACGGCCTGCCTTACGGCC                           |       |       |       |                                    |                                              |
| 31836                                                           | 31861 | 31040 | 40651 | CDS product large tegument protein | 31836-31861 7:04:01 GGCCGTGGCGGTGGGCGGCGGGGG |
| 31950                                                           | 31983 | 31040 | 40651 | CDS product large tegument protein | 31950-31983 6:03:01                          |
| GGCCGCGGCCGCGGCTCGCGCGCGGGTAAGCGG                               |       |       |       |                                    |                                              |
| 31997                                                           | 32016 | 31040 | 40651 | CDS product large tegument protein | 31997-32016 5:02:01 GGCGGCGGCGGGCCCCGTGG     |
| 32009                                                           | 32041 | 31040 | 40651 | CDS product large tegument protein | 32009-32041 5:02:01                          |
| CCCCGTGGACGCCGCCCTCGAGCCGCGAGGACC                               |       |       |       |                                    |                                              |
| 32088                                                           | 32152 | 31040 | 40651 | CDS product large tegument protein | 32088-32152 13:10:03                         |
| GGTCCGGGGCGCGGAGACGGCGGGGGCCGGGGAAGATTGGGGGAGGGGGAAACGCGGCTGCGG |       |       |       |                                    |                                              |
| 32153                                                           | 32165 | 31040 | 40651 | CDS product large tegument protein | 32153-32165 4:01:01 CCCGCCCGCCGCC            |
| 32177                                                           | 32196 | 31040 | 40651 | CDS product large tegument protein | 32177-32196 4:01:01 CCGCCGCGCCCGCGCACGCC     |
| 32202                                                           | 32222 | 31040 | 40651 | CDS product large tegument protein | 32202-32222 4:01:01 GGCGTGCGCGGCGGAGCTTGG    |
| 32232                                                           | 32254 | 31040 | 40651 | CDS product large tegument protein | 32232-32254 5:02:01 GGCGGAGGTTACGCGGCCTTGG   |
| 32243                                                           | 32263 | 31040 | 40651 | CDS product large tegument protein | 32243-32263 4:01:01 CCGCGGCCTTGGACGCCGTCC    |
| 32441                                                           | 32459 | 31040 | 40651 | CDS product large tegument protein | 32441-32459 4:01:01 CCCCCTCGGCCGTCCAGCC      |
| 32467                                                           | 32482 | 31040 | 40651 | CDS product large tegument protein | 32467-32482 4:01:01 GGGGCGGTGGCCCAGG         |
| 32527                                                           | 32548 | 31040 | 40651 | CDS product large tegument protein | 32527-32548 4:01:01 GGGATGGTGCTCGAGGGGCTGG   |
| 32592                                                           | 32611 | 31040 | 40651 | CDS product large tegument protein | 32592-32611 4:01:01 GGCGCTGGGCGACCTGGCGG     |
| 32676                                                           | 32717 | 31040 | 40651 | CDS product large tegument protein | 32676-32717 9:06:02                          |
| GGACGAGCTGGAGGGCGAGGTGGACGGCGCCGGCGGCGCGGG                      |       |       |       |                                    |                                              |
| 32763                                                           | 32779 | 31040 | 40651 | CDS product large tegument protein | 32763-32779 4:01:01 CCTCTCGGCCTCCGGCC        |

|                                                                  |       |       |       |                                    |
|------------------------------------------------------------------|-------|-------|-------|------------------------------------|
| 32769                                                            | 32784 | 31040 | 40651 | CDS product large tegument protein |
| 32870                                                            | 32889 | 31040 | 40651 | CDS product large tegument protein |
| 32913                                                            | 32929 | 31040 | 40651 | CDS product large tegument protein |
| 32949                                                            | 32975 | 31040 | 40651 | CDS product large tegument protein |
| 32982                                                            | 33016 | 31040 | 40651 | CDS product large tegument protein |
| GGTGCCCGCGGACAGCGCGGTGGCCGACTTGCGCG                              |       |       |       |                                    |
| 33059                                                            | 33075 | 31040 | 40651 | CDS product large tegument protein |
| 33146                                                            | 33160 | 31040 | 40651 | CDS product large tegument protein |
| 33240                                                            | 33263 | 31040 | 40651 | CDS product large tegument protein |
| 33266                                                            | 33303 | 31040 | 40651 | CDS product large tegument protein |
| CCGCGCCGGGCGCCGCGGCCTCCGCTGCCGCGGTCC                             |       |       |       |                                    |
| 33367                                                            | 33385 | 31040 | 40651 | CDS product large tegument protein |
| 33399                                                            | 33413 | 31040 | 40651 | CDS product large tegument protein |
| 33469                                                            | 33508 | 31040 | 40651 | CDS product large tegument protein |
| GGGCGCTCGCGTCGCGGGCGTCGCTGGAGGCGAGCATGG                          |       |       |       |                                    |
| 33531                                                            | 33554 | 31040 | 40651 | CDS product large tegument protein |
| 33564                                                            | 33581 | 31040 | 40651 | CDS product large tegument protein |
| 33648                                                            | 33673 | 31040 | 40651 | CDS product large tegument protein |
| 33699                                                            | 33766 | 31040 | 40651 | CDS product large tegument protein |
| GGCCGCGCCCGCGCGGGGCTAGAGGCGCAGGCGCTCGCGGCGGGCGCGCTGGCCGAGCTGGGGG |       |       |       |                                    |
| 33840                                                            | 33861 | 31040 | 40651 | CDS product large tegument protein |
| 34008                                                            | 34034 | 31040 | 40651 | CDS product large tegument protein |
| 34068                                                            | 34090 | 31040 | 40651 | CDS product large tegument protein |

|             |          |                            |
|-------------|----------|----------------------------|
| 32769-32784 | 4:01:01  | GGCCTCCGGCCGCGG            |
| 32870-32889 | 4:01:01  | CCCGCTGGCCGCGAGACC         |
| 32913-32929 | 4:01:01  | GGCGCTGGAGGGCACGG          |
| 32949-32975 | 5:02:01  | CCTGGACGCCGTCCCGCCGACGACCC |
| 32982-33016 | 6:03:01  |                            |
| 33059-33075 | 5:02:01  | CCGCCGCCCTCTCCGCC          |
| 33146-33160 | 4:01:01  | CCATCTGGCCGACC             |
| 33240-33263 | 6:03:01  | GGCGGCGGGTGGCTCGGCTTG      |
| 33266-33303 | 7:04:01  |                            |
| 33367-33385 | 4:01:01  | GGCTCGCGGCTGGGTGG          |
| 33399-33413 | 4:01:01  | GGCGCAGCGGAAGG             |
| 33469-33508 | 6:03:01  |                            |
| 33531-33554 | 7:04:01  | GGCGGCGCGGGCGGGCGGGG       |
| 33564-33581 | 4:01:01  | GGAGGCGCCGGGCGCGGG         |
| 33648-33673 | 5:02:01  | GGACGCCCTGGCGACGGGCGGGCGG  |
| 33699-33766 | 11:08:02 |                            |
| 33840-33861 | 4:01:01  | GGCGCCGCGCGCTGGAGCGG       |
| 34008-34034 | 5:02:01  | GGCGCGGGCGCGCTGGCCGGGCTGGG |
| 34068-34090 | 4:01:01  | GGGCCAGGCGATGGGCCCCGCG     |



|                                                         |       |       |       |                                    |             |                                     |
|---------------------------------------------------------|-------|-------|-------|------------------------------------|-------------|-------------------------------------|
| 34107                                                   | 34162 | 31040 | 40651 | CDS product large tegument protein | 34107-34162 | 9:06:02                             |
| GGGGCACGCGGAGCGCGTGGCGGCCGCCGTGGCTCGCGCGCGGCGGAGCCTGCGG |       |       |       |                                    |             |                                     |
| 34156                                                   | 34182 | 31040 | 40651 | CDS product large tegument protein | 34156-34182 | 5:02:01 CCTGCGGCGCCTGCCGCGGTGGCCGCC |
| 34203                                                   | 34229 | 31040 | 40651 | CDS product large tegument protein | 34203-34229 | 6:03:01 GGCGGCTGAGGCGCTGCGGGCCGGGGG |
| 34306                                                   | 34322 | 31040 | 40651 | CDS product large tegument protein | 34306-34322 | 4:01:01 GGCGCGCGCGGCTGGG            |
| 34440                                                   | 34465 | 31040 | 40651 | CDS product large tegument protein | 34440-34465 | 6:03:01 GGCAGACGCGCGCTGGGGGCGGCGG   |
| 34478                                                   | 34534 | 31040 | 40651 | CDS product large tegument protein | 34478-34534 | 12:09:03                            |
| GGGCCGCGGACGAGCCGCGGTGGCCGCCGCGGCGAGGATGCGGACGGCGCGAGG  |       |       |       |                                    |             |                                     |
| 34545                                                   | 34565 | 31040 | 40651 | CDS product large tegument protein | 34545-34565 | 4:01:01 GGCCGACGCGGACGGCGCCGG       |
| 34629                                                   | 34650 | 31040 | 40651 | CDS product large tegument protein | 34629-34650 | 5:02:01 GGCCCGGGCGCTGGCGCGGCGG      |
| 34665                                                   | 34686 | 31040 | 40651 | CDS product large tegument protein | 34665-34686 | 4:01:01 CCGGCGCCTGCGCGCCGAGGCC      |
| 34718                                                   | 34741 | 31040 | 40651 | CDS product large tegument protein | 34718-34741 | 5:02:01 GGCAGGAGGAGCGCTGGCGCGAGG    |
| 34844                                                   | 34879 | 31040 | 40651 | CDS product large tegument protein | 34844-34879 | 7:04:01                             |
| GGCCGCTGGCGCGGCGAGGCCGACCGGGCGCTGGAGG                   |       |       |       |                                    |             |                                     |
| 35157                                                   | 35173 | 31040 | 40651 | CDS product large tegument protein | 35157-35173 | 4:01:01 GGAGGGCGACCTGGCGG           |
| 35213                                                   | 35236 | 31040 | 40651 | CDS product large tegument protein | 35213-35236 | 5:02:01 GGGGGCACGCGGCCTTCGAGGAGG    |
| 35277                                                   | 35299 | 31040 | 40651 | CDS product large tegument protein | 35277-35299 | 6:03:01 GGCGGCCGCGGGCGCGCGGCGG      |
| 35496                                                   | 35551 | 31040 | 40651 | CDS product large tegument protein | 35496-35551 | 10:07:02                            |
| GGCCGCGGCGGAGAGGCGCTAGAGGCGGCAAAGGCGGCGCGCGGAGGCCACGG   |       |       |       |                                    |             |                                     |
| 35572                                                   | 35596 | 31040 | 40651 | CDS product large tegument protein | 35572-35596 | 5:02:01 GGCGAGGTCGTGGCTGCCGAGGCGG   |
| 35618                                                   | 35641 | 31040 | 40651 | CDS product large tegument protein | 35618-35641 | 4:01:01 CCGGGCTGGCCAACCTCAAGAACC    |
| 35688                                                   | 35706 | 31040 | 40651 | CDS product large tegument protein | 35688-35706 | 4:01:01 CCGCGCCGCTCGGCGGCC          |
| 35736                                                   | 35784 | 31040 | 40651 | CDS product large tegument protein | 35736-35784 | 11:08:02                            |

|                                                             |       |       |       |                                    |                                                |
|-------------------------------------------------------------|-------|-------|-------|------------------------------------|------------------------------------------------|
| GGCGGCCGTGGAGGAGGCGCCGGAGCTGGACGTGGCCGCGGTGGAGTGG           |       |       |       |                                    |                                                |
| 35915                                                       | 35959 | 31040 | 40651 | CDS product large tegument protein | 35915-35959 10:07:02                           |
| GGCGGCAGCTGGAGTCGGCGGCGGCGCGTGGGACGGCGCGTGGG                |       |       |       |                                    |                                                |
| 35979                                                       | 35994 | 31040 | 40651 | CDS product large tegument protein | 35979-35994 4:01:01 CCGCCGCGCGGCCGCC           |
| 36042                                                       | 36066 | 31040 | 40651 | CDS product large tegument protein | 36042-36066 5:02:01 GGCGGCCGCGGCGTGGTGCTGGGG   |
| 36112                                                       | 36143 | 31040 | 40651 | CDS product large tegument protein | 36112-36143 6:03:01                            |
| GGCGCGCTGGACGCGCGGCTGGCGGAGCGCGG                            |       |       |       |                                    |                                                |
| 36158                                                       | 36180 | 31040 | 40651 | CDS product large tegument protein | 36158-36180 4:01:01 CCTTCCACGAAGCCGCGCGCGCC    |
| 36219                                                       | 36235 | 31040 | 40651 | CDS product large tegument protein | 36219-36235 4:01:01 GGCGGTGCGCGGCGAGG          |
| 36287                                                       | 36310 | 31040 | 40651 | CDS product large tegument protein | 36287-36310 5:02:01 CCGAGCTCCCGCCTGGCCGCC      |
| 36526                                                       | 36548 | 31040 | 40651 | CDS product large tegument protein | 36526-36548 4:01:01 GGGCGCGTGGCGGCCCTTCTGGG    |
| 36607                                                       | 36627 | 31040 | 40651 | CDS product large tegument protein | 36607-36627 4:01:01 CCGCGCGCCTACCTGGACGCC      |
| 36739                                                       | 36760 | 31040 | 40651 | CDS product large tegument protein | 36739-36760 6:03:01 GGCGTGGTGGAGGCGGCTTCGG     |
| 36875                                                       | 36886 | 31040 | 40651 | CDS product large tegument protein | 36875-36886 4:01:01 GGGGGCTGGCGG               |
| 36987                                                       | 37029 | 31040 | 40651 | CDS product large tegument protein | 36987-37029 7:04:01                            |
| GGCCGAGCGGGGCTGCGGCCAGCGGGCGCCGGCGAGCGGG                    |       |       |       |                                    |                                                |
| 37227                                                       | 37252 | 31040 | 40651 | CDS product large tegument protein | 37227-37252 4:01:01 GGGAGAGCCCGGTGCGAGGCGCCCGG |
| 37261                                                       | 37289 | 31040 | 40651 | CDS product large tegument protein | 37261-37289 7:04:01                            |
| GGCGGCGGCGGACGACCCGGCGGACGG                                 |       |       |       |                                    |                                                |
| 37301                                                       | 37314 | 31040 | 40651 | CDS product large tegument protein | 37301-37314 4:01:01 CCATCCGCGCCGCC             |
| 37329                                                       | 37344 | 31040 | 40651 | CDS product large tegument protein | 37329-37344 4:01:01 CCGCCTTTCCCGTCC            |
| 37590                                                       | 37650 | 31040 | 40651 | CDS product large tegument protein | 37590-37650 12:09:03                           |
| GGGCGGCCCTTCGAAGACGCGGCGGCGCTGGCCGCTGCGGCTGCGGCGCCGGGGGCCGG |       |       |       |                                    |                                                |

|                                                                                                                         |       |       |       |                                    |                                               |
|-------------------------------------------------------------------------------------------------------------------------|-------|-------|-------|------------------------------------|-----------------------------------------------|
| 37764                                                                                                                   | 37798 | 31040 | 40651 | CDS product large tegument protein | 37764-37798 5:02:01                           |
| GGGCGCGCCGTTGTCGTGGCCATGGAGAACCCGG                                                                                      |       |       |       |                                    |                                               |
| 37871                                                                                                                   | 37887 | 31040 | 40651 | CDS product large tegument protein | 37871-37887 4:01:01 CCGACGCGCCTGCCGCC         |
| 37910                                                                                                                   | 37927 | 31040 | 40651 | CDS product large tegument protein | 37910-37927 4:01:01 GGGGGGAGCGGCTGCTGG        |
| 38081                                                                                                                   | 38093 | 31040 | 40651 | CDS product large tegument protein | 38081-38093 4:01:01 CCGCCGCGCCGCC             |
| 38173                                                                                                                   | 38198 | 31040 | 40651 | CDS product large tegument protein | 38173-38198 6:03:01 CCCCCGCGGCCAGCGCCGCCGACCC |
| 38274                                                                                                                   | 38298 | 31040 | 40651 | CDS product large tegument protein | 38274-38298 5:02:01 CCCCCCGTGTTCAGCACGCCACC   |
| 38321                                                                                                                   | 38345 | 31040 | 40651 | CDS product large tegument protein | 38321-38345 7:04:01 GGGCGGCGGAGGTGGCGGCAGCGG  |
| 38418                                                                                                                   | 38446 | 31040 | 40651 | CDS product large tegument protein | 38418-38446 6:03:01                           |
| GGCACCGGCACTGGCACCGGCTTCGGCGG                                                                                           |       |       |       |                                    |                                               |
| 38505                                                                                                                   | 38517 | 31040 | 40651 | CDS product large tegument protein | 38505-38517 4:01:01 CCCGCCGGCCCCC             |
| 38532                                                                                                                   | 38544 | 31040 | 40651 | CDS product large tegument protein | 38532-38544 4:01:01 CCCGCCGGCCCCC             |
| 38559                                                                                                                   | 38571 | 31040 | 40651 | CDS product large tegument protein | 38559-38571 4:01:01 CCCGCCGGCCCCC             |
| 38617                                                                                                                   | 38636 | 31040 | 40651 | CDS product large tegument protein | 38617-38636 4:01:01 GGAGCCGCGGAGGCTCCTGG      |
| 38684                                                                                                                   | 38702 | 31040 | 40651 | CDS product large tegument protein | 38684-38702 4:01:01 CCATGCCCGCCGCGTTGCC       |
| 38712                                                                                                                   | 38906 | 31040 | 40651 | CDS product large tegument protein | 38712-38906 44:41:11                          |
| CCCGCCGCGCGAAGCCTGGTCTCCGCAGCGCTCCAGTGCCTCCGGGGCCGCGCTGCCGCCGGCCCCGCCATTGCCGCCGGCCCCGCCATTGCCGCCGGCCCCGCCATTGCCACCGCCGG |       |       |       |                                    |                                               |
| CCCCGCCATTGCCGCCGGCCCCGCCATTGCCGCCGGCCCCGCCATTGCCGCCGGCCCC                                                              |       |       |       |                                    |                                               |
| 38915                                                                                                                   | 39020 | 31040 | 40651 | CDS product large tegument protein | 38915-39020 20:17:05                          |
| CCCCGTTCCGGCCCCGCCATTGCCGCCGGGCCCTGACTCCGGCCCTGACTCCGGCCCCGACTCCGGCCCCGACTCCGGCCCCGCCATTGCCGCTGCCGGCCCC                 |       |       |       |                                    |                                               |
| 39027                                                                                                                   | 39058 | 31040 | 40651 | CDS product large tegument protein | 39027-39058 6:03:01                           |
| GGTTTTGGTTCCGGCCCCGGTTCCGGCTCCGG                                                                                        |       |       |       |                                    |                                               |
| 39037                                                                                                                   | 39131 | 31040 | 40651 | CDS product large tegument protein | 39037-39131 18:15:04                          |

CCGGCCCCGGTTCCGGCTCCGGCCCCGATTCCGGCTCCGGCCCCGACTCCGGCTCCGGCCCCGACTCCGGCTCCGCCATTGCCGCCGCCGGCTCC

|                                                                                                    |       |       |       |                                    |             |          |                        |
|----------------------------------------------------------------------------------------------------|-------|-------|-------|------------------------------------|-------------|----------|------------------------|
| 39244                                                                                              | 39263 | 31040 | 40651 | CDS product large tegument protein | 39244-39263 | 4:01:01  | CCCGCCAGCGTTCCGGCGCC   |
| 39325                                                                                              | 39338 | 31040 | 40651 | CDS product large tegument protein | 39325-39338 | 4:01:01  | CCGTCCAGACCGCC         |
| 39349                                                                                              | 39392 | 31040 | 40651 | CDS product large tegument protein | 39349-39392 | 8:05:02  |                        |
| CCCGTGCCTGGCTTGCCCTGCCGCCGAGCCGGGTCCAAGCACC                                                        |       |       |       |                                    |             |          |                        |
| 39403                                                                                              | 39570 | 31040 | 40651 | CDS product large tegument protein | 39403-39570 | 32:29:08 |                        |
| CCCGCGCCGCCCCCGCGCCAGAGCGGCCCCGCGCCGCCCCCGCGCCAGAGCGGCCCCGCGCGCCCCCGCGCCAGAGCGGCCCCGCGCGCCCCCGCGCC |       |       |       |                                    |             |          |                        |
| AGAGCGGCCCCGCGCGCCCCCGCGCCAGAGCGGCCCCGCG                                                           |       |       |       |                                    |             |          |                        |
| 39618                                                                                              | 39631 | 31040 | 40651 | CDS product large tegument protein | 39618-39631 | 4:01:01  | GGTGGGCCAGGTGG         |
| 39673                                                                                              | 39693 | 31040 | 40651 | CDS product large tegument protein | 39673-39693 | 4:01:01  | CCTGGCGCGCCCGCCAGGCCC  |
| 39725                                                                                              | 39744 | 31040 | 40651 | CDS product large tegument protein | 39725-39744 | 4:01:01  | CCCGGGCCGTTGACCCTACC   |
| 39829                                                                                              | 39847 | 31040 | 40651 | CDS product large tegument protein | 39829-39847 | 4:01:01  | CCGCCTGGCCCCGCTCCCC    |
| 39856                                                                                              | 39889 | 31040 | 40651 | CDS product large tegument protein | 39856-39889 | 7:04:01  |                        |
| CCCCCTGCGCCTTCGGCCCTGCCGGCGCCGCGCC                                                                 |       |       |       |                                    |             |          |                        |
| 39916                                                                                              | 40052 | 31040 | 40651 | CDS product large tegument protein | 39916-40052 | 25:22:06 |                        |
| CCGGCGCCCCCGATCGCGCCCCGATCGCGCCCCGATCGCGCCCCGATCGCGCCCCGATCGCGCCCCGATCGCGCCCCGATCGCGCCCCCGCCATGCC  |       |       |       |                                    |             |          |                        |
| GGCACCCCC                                                                                          |       |       |       |                                    |             |          |                        |
| 40082                                                                                              | 40118 | 31040 | 40651 | CDS product large tegument protein | 40082-40118 | 8:05:02  |                        |
| CCGCGCCCCCAATCGCGCCCCCGCCACGCCAGCGCC                                                               |       |       |       |                                    |             |          |                        |
| 40129                                                                                              | 40148 | 31040 | 40651 | CDS product large tegument protein | 40129-40148 | 4:01:01  | CCCCTTGCCGCGCCGGTGCC   |
| 40143                                                                                              | 40165 | 31040 | 40651 | CDS product large tegument protein | 40143-40165 | 5:02:01  | GGTGCTCGGTTGGTAGGTGCGG |
| 40324                                                                                              | 40345 | 31040 | 40651 | CDS product large tegument protein | 40324-40345 | 5:02:01  | CCCGCGCCCCCAAGTCCCCC   |
| 40358                                                                                              | 40378 | 31040 | 40651 | CDS product large tegument protein | 40358-40378 | 4:01:01  | CCGACGCCACCGATAGCTCCC  |

|                                   |       |       |       |                                             |                                              |
|-----------------------------------|-------|-------|-------|---------------------------------------------|----------------------------------------------|
| 40380                             | 40408 | 31040 | 40651 | CDS product large tegument protein          | 40380-40408 6:03:01                          |
| GGACGGAAGCGGGCCGAAACGGAAGAGG      |       |       |       |                                             |                                              |
| 40419                             | 40442 | 31040 | 40651 | CDS product large tegument protein          | 40419-40442 5:02:01 GGAAGCGGGGGGCGACGGCCCCGG |
| 40831                             | 40850 | 40812 | 41186 | CDS product small capsid protein            | 40831-40850 5:02:01 CCGCCGCGCCAGCGTCCTCC     |
| 40879                             | 40890 | 40812 | 41186 | CDS product small capsid protein            | 40879-40890 4:01:01 GGGGAGGAAGG              |
| 41030                             | 41051 | 40812 | 41186 | CDS product small capsid protein            | 41030-41051 4:01:01 CCGGGCCGCGCTCACCTGCTCC   |
| 41128                             | 41162 | 40812 | 41186 | CDS product small capsid protein            | 41128-41162 6:03:01                          |
| GGGTGTCGGGGTGATGGTAGCCGCGCACTAGGG |       |       |       |                                             |                                              |
| 41357                             | 41371 | 41231 | 42013 | CDS product nuclear egress membrane protein | 41357-41371 4:01:01 CCGGCGCCGCCGGCC          |
| 41548                             | 41575 | 41231 | 42013 | CDS product nuclear egress membrane protein | 41548-41575 4:01:01                          |
| GGACATCATGGCGCGAAAGGGCCGTGGG      |       |       |       |                                             |                                              |
| 41766                             | 41792 | 41231 | 42013 | CDS product nuclear egress membrane protein | 41766-41792 4:01:01                          |
| CCGTCTGCGCCCAGCTGGCCATTAGCC       |       |       |       |                                             |                                              |
| 41863                             | 41892 | 41231 | 42013 | CDS product nuclear egress membrane protein | 41863-41892 6:03:01                          |
| GGGCGGGCGGCGCGGGTCCCAGGGCTGGGG    |       |       |       |                                             |                                              |
| 41966                             | 41985 | 41231 | 42013 | CDS product nuclear egress membrane protein | 41966-41985 4:01:01 CCCTCGCCCTCGCCCTCGCC     |
| 42185                             | 42198 | 42124 | 42450 | CDS product DNA packaging protein UL33      | 42185-42198 4:01:01 CCTTCCTCGCCTCC           |
| 42221                             | 42239 | 42124 | 42450 | CDS product DNA packaging protein UL33      | 42221-42239 5:02:01 CCGCCCGCCCGCCCGAGCC      |
| 42291                             | 42305 | 42124 | 42450 | CDS product DNA packaging protein UL33      | 42291-42305 4:01:01 GGCGTCGGTGGTGGG          |
| 42389                             | 42420 | 42124 | 42450 | CDS product DNA packaging protein UL33      | 42389-42420 5:02:01                          |
| CCAGCTCGGCCACGTCCTCGGTGGCCAGCGCC  |       |       |       |                                             |                                              |
| 42469                             | 42488 | 42431 | 44236 | CDS product DNA packaging protein UL32      | 42469-42488 5:02:01 GGCGCCGGTGCGGCGCATGG     |
| 42628                             | 42659 | 42431 | 44236 | CDS product DNA packaging protein UL32      | 42628-42659 7:04:01                          |

GGGGACGAGGACGGGGGTGGTACAGGGACGG

42669 42680 42431 44236 CDS product DNA packaging protein UL32

42713 42747 42431 44236 CDS product DNA packaging protein UL32

CCGCCCGCGCTGGCCATCGACCGGCCCTGCGCC

42793 42816 42431 44236 CDS product DNA packaging protein UL32

42844 42861 42431 44236 CDS product DNA packaging protein UL32

42891 42927 42431 44236 CDS product DNA packaging protein UL32

CCTGATGGACCGGCACTTCCTAGCCGCGCACCGCGCC

43011 43028 42431 44236 CDS product DNA packaging protein UL32

43088 43108 42431 44236 CDS product DNA packaging protein UL32

43113 43165 42431 44236 CDS product DNA packaging protein UL32

GGCAACGCGGGCGCTGCTGGCTCGGCGGCGGAGGCGCCCGAGGCGCCGCGG

43276 43316 42431 44236 CDS product DNA packaging protein UL32

GGTGGCGGTGGGGGCGCGGGCGGCGCGGCCCGGGGGG

43412 43428 42431 44236 CDS product DNA packaging protein UL32

43535 43548 42431 44236 CDS product DNA packaging protein UL32

43644 43669 42431 44236 CDS product DNA packaging protein UL32

GGCGCTGGGGCCGGTGCTGGCCACGG

43846 43871 42431 44236 CDS product DNA packaging protein UL32

GGCGCGCCGGTCGAGGGCGACGGCGG

44115 44139 42431 44236 CDS product DNA packaging protein UL32

CCAGCGGTTCCTCCCAAGCCGACC

44306 44327 44229 45314 CDS product nuclear egress lamina protein

42669-42680 4:01:01 GGAGGGGGGCGG

42713-42747 7:04:01

42793-42816 4:01:01 CCCCCCTGGGTGGCCGACTACGCC

42844-42861 4:01:01 CCGCCCTGTGCCGTGGCC

42891-42927 6:03:01

43011-43028 4:01:01 GGACGGCGGCGTTCCCGG

43088-43108 4:01:01 CCAACTACTCCTTCCTCATCC

43113-43165 11:08:02

43276-43316 10:07:02

43412-43428 4:01:01 CCGCGGCCAGCGCCGCC

43535-43548 4:01:01 CCGCGCGCGCCGCC

43644-43669 5:02:01

43846-43871 5:02:01

44115-44139 5:02:01

44306-44327 4:01:01

|                                         |       |       |       |                                              |                                      |
|-----------------------------------------|-------|-------|-------|----------------------------------------------|--------------------------------------|
| GGCGACTGGGCAACGGCCCCGG                  |       |       |       |                                              |                                      |
| 44322                                   | 44357 | 44229 | 45314 | CDS product nuclear egress lamina protein    | 44322-44357 6:03:01                  |
| CCCCGGCCTCGACACCAGCCCCGGCCCCGGGGCGCC    |       |       |       |                                              |                                      |
| 44439                                   | 44465 | 44229 | 45314 | CDS product nuclear egress lamina protein    | 44439-44465 5:02:01                  |
| CCCGCTCCCGGGGCCCGGCCACGCGCC             |       |       |       |                                              |                                      |
| 44488                                   | 44504 | 44229 | 45314 | CDS product nuclear egress lamina protein    | 44488-44504 4:01:01 GGGGGCGCGGCGCGCG |
| 44707                                   | 44733 | 44229 | 45314 | CDS product nuclear egress lamina protein    | 44707-44733 5:02:01                  |
| CCCCGCCTGCACCGTGACGGCGAGCC              |       |       |       |                                              |                                      |
| 44803                                   | 44825 | 44229 | 45314 | CDS product nuclear egress lamina protein    | 44803-44825 6:03:01                  |
| CCGGGCCTTCCTGGCCTCCATCC                 |       |       |       |                                              |                                      |
| 44834                                   | 44862 | 44229 | 45314 | CDS product nuclear egress lamina protein    | 44834-44862 7:04:01                  |
| GGCGGGACGGACGACGGCGGCTTTGGCGG           |       |       |       |                                              |                                      |
| 44868                                   | 44890 | 44229 | 45314 | CDS product nuclear egress lamina protein    | 44868-44890 5:02:01                  |
| CCCCCGGCCCCGGCGGCCCCACC                 |       |       |       |                                              |                                      |
| 45042                                   | 45074 | 44229 | 45314 | CDS product nuclear egress lamina protein    | 45042-45074 8:05:02                  |
| CCATCCACCTGCACCACCGCCTGCTGGACCACC       |       |       |       |                                              |                                      |
| 45139                                   | 45162 | 44229 | 45314 | CDS product nuclear egress lamina protein    | 45139-45162 6:03:01                  |
| GGTGCGCCGGGACGGGGGTGGGGG                |       |       |       |                                              |                                      |
| 45190                                   | 45212 | 44229 | 45314 | CDS product nuclear egress lamina protein    | 45190-45212 5:02:01                  |
| GGTGCCGGCGGTGAGCGGGGG                   |       |       |       |                                              |                                      |
| 45428                                   | 45466 | 45238 | 48978 | CDS product DNA polymerase catalytic subunit | 45428-45466 7:04:01                  |
| GGGCCTTGAAGGTGGCGCCGACGGTGCCTAGGAGGTGGG |       |       |       |                                              |                                      |
| 45503                                   | 45534 | 45238 | 48978 | CDS product DNA polymerase catalytic subunit | 45503-45534 5:02:01                  |

|                                  |       |       |       |                                              |                                     |
|----------------------------------|-------|-------|-------|----------------------------------------------|-------------------------------------|
| CCCGCGCATACCCCGGGTCCTCGGCCATGTCC |       |       |       |                                              |                                     |
| 45570                            | 45586 | 45238 | 48978 | CDS product DNA polymerase catalytic subunit | 45570-45586 4:01:01                 |
| GGGCGGCGCGGACGGGG                |       |       |       |                                              |                                     |
| 45741                            | 45762 | 45238 | 48978 | CDS product DNA polymerase catalytic subunit | 45741-45762 5:02:01                 |
| GGCGTAGGCCTCCGGTGGGCGG           |       |       |       |                                              |                                     |
| 45891                            | 45919 | 45238 | 48978 | CDS product DNA polymerase catalytic subunit | 45891-45919 6:03:01                 |
| GGGCGGCACGGCCGAGGCCTCGGCCGCGG    |       |       |       |                                              |                                     |
| 46033                            | 46049 | 45238 | 48978 | CDS product DNA polymerase catalytic subunit | 46033-46049 4:01:01                 |
| CCGCCGCCGACAAGGCC                |       |       |       |                                              |                                     |
| 46130                            | 46161 | 45238 | 48978 | CDS product DNA polymerase catalytic subunit | 46130-46161 6:03:01                 |
| CCGCCGAAACCCGGCGGCCATGCCGTCGCC   |       |       |       |                                              |                                     |
| 46208                            | 46230 | 45238 | 48978 | CDS product DNA polymerase catalytic subunit | 46208-46230 4:01:01                 |
| CCGAGTCCGTGTCGCCGTAAACC          |       |       |       |                                              |                                     |
| 46241                            | 46258 | 45238 | 48978 | CDS product DNA polymerase catalytic subunit | 46241-46258 5:02:01                 |
| GGTAGCGGCCGGCGGCGG               |       |       |       |                                              |                                     |
| 46259                            | 46275 | 45238 | 48978 | CDS product DNA polymerase catalytic subunit | 46259-46275 5:02:01                 |
| CCGCCCGGGCCGGCC                  |       |       |       |                                              |                                     |
| 46488                            | 46503 | 45238 | 48978 | CDS product DNA polymerase catalytic subunit | 46488-46503 4:01:01 GGGCGGCGGGTGGGG |
| 46772                            | 46796 | 45238 | 48978 | CDS product DNA polymerase catalytic subunit | 46772-46796 5:02:01                 |
| CCAAAACCTTGCCCCCTGGTACCC         |       |       |       |                                              |                                     |
| 46824                            | 46859 | 45238 | 48978 | CDS product DNA polymerase catalytic subunit | 46824-46859 7:04:01                 |
| CCGGTCCGCCGCGCCGCGGCCCTCGTTCCCCC |       |       |       |                                              |                                     |
| 46870                            | 46915 | 45238 | 48978 | CDS product DNA polymerase catalytic subunit | 46870-46915 9:06:02                 |



|                                                 |       |       |       |                                              |                     |
|-------------------------------------------------|-------|-------|-------|----------------------------------------------|---------------------|
| CCCCCTCGTCCTCCTCTTCTCCTCGCCGCGAGCCGCGTCGGCCC    |       |       |       |                                              |                     |
| 46931                                           | 46976 | 45238 | 48978 | CDS product DNA polymerase catalytic subunit | 46931-46976 9:06:02 |
| CCCCCGTCCCCGCCGGCGCCCCGCGCCGCGCGGCTCGGCTCC      |       |       |       |                                              |                     |
| 46965                                           | 47000 | 45238 | 48978 | CDS product DNA polymerase catalytic subunit | 46965-47000 6:03:01 |
| GGCCTCGGCTCCGGCGAGGCGCTTTTGGGTGTCCGG            |       |       |       |                                              |                     |
| 47084                                           | 47121 | 45238 | 48978 | CDS product DNA polymerase catalytic subunit | 47084-47121 8:05:02 |
| CCGTGATTCCGGCCAGCCGCGCCACCGCCGACAGCTCC          |       |       |       |                                              |                     |
| 47185                                           | 47214 | 45238 | 48978 | CDS product DNA polymerase catalytic subunit | 47185-47214 5:02:01 |
| CCGATGACGCGCGCCCCTCGGGCCCGGCC                   |       |       |       |                                              |                     |
| 47234                                           | 47280 | 45238 | 48978 | CDS product DNA polymerase catalytic subunit | 47234-47280 9:06:02 |
| CCTTGTAGTCCAGGTCCACCTTCCGCTCCCGCAGGGCCTCCTCGGCC |       |       |       |                                              |                     |
| 47601                                           | 47623 | 45238 | 48978 | CDS product DNA polymerase catalytic subunit | 47601-47623 5:02:01 |
| GGCGGGCGCGGGAGCCCGGCGG                          |       |       |       |                                              |                     |
| 47639                                           | 47662 | 45238 | 48978 | CDS product DNA polymerase catalytic subunit | 47639-47662 6:03:01 |
| GGAAGCCGGCGGCAGGTCGCAGG                         |       |       |       |                                              |                     |
| 47732                                           | 47766 | 45238 | 48978 | CDS product DNA polymerase catalytic subunit | 47732-47766 6:03:01 |
| GGACGACGAGGTCTCGGCGTTGGCGGCCGCCGGG              |       |       |       |                                              |                     |
| 47759                                           | 47784 | 45238 | 48978 | CDS product DNA polymerase catalytic subunit | 47759-47784 5:02:01 |
| CCGCCGGGAACGCCAGCCCGTCGCCC                      |       |       |       |                                              |                     |
| 48143                                           | 48165 | 45238 | 48978 | CDS product DNA polymerase catalytic subunit | 48143-48165 5:02:01 |
| CCGCTGCCTCGACCACCGCGACC                         |       |       |       |                                              |                     |
| 48190                                           | 48208 | 45238 | 48978 | CDS product DNA polymerase catalytic subunit | 48190-48208 4:01:01 |
| CCCAGGTAACCGCCGGGCC                             |       |       |       |                                              |                     |

|                                            |       |       |       |                                              |                     |                 |
|--------------------------------------------|-------|-------|-------|----------------------------------------------|---------------------|-----------------|
| 48219                                      | 48232 | 45238 | 48978 | CDS product DNA polymerase catalytic subunit | 48219-48232 4:01:01 | GGCCCCGGCCGGCGG |
| 48236                                      | 48264 | 45238 | 48978 | CDS product DNA polymerase catalytic subunit | 48236-48264 5:02:01 |                 |
| CCTGCTGTGCCGCGCCGGCGGCCAGGGCC              |       |       |       |                                              |                     |                 |
| 48252                                      | 48268 | 45238 | 48978 | CDS product DNA polymerase catalytic subunit | 48252-48268 4:01:01 |                 |
| GGCGGCCAGGGCCGAGG                          |       |       |       |                                              |                     |                 |
| 48324                                      | 48340 | 45238 | 48978 | CDS product DNA polymerase catalytic subunit | 48324-48340 4:01:01 |                 |
| GGCTAGGTCGACGGCGG                          |       |       |       |                                              |                     |                 |
| 48397                                      | 48414 | 45238 | 48978 | CDS product DNA polymerase catalytic subunit | 48397-48414 4:01:01 |                 |
| CCGTCCTCCGACATGCCC                         |       |       |       |                                              |                     |                 |
| 48428                                      | 48450 | 45238 | 48978 | CDS product DNA polymerase catalytic subunit | 48428-48450 5:02:01 |                 |
| CCGTGGCGCCGCGGGCCGGGCC                     |       |       |       |                                              |                     |                 |
| 48432                                      | 48466 | 45238 | 48978 | CDS product DNA polymerase catalytic subunit | 48432-48466 6:03:01 |                 |
| GGCGCCGCGGGCCGGGCTCGGCGGCAAAGCGGG          |       |       |       |                                              |                     |                 |
| 48701                                      | 48743 | 45238 | 48978 | CDS product DNA polymerase catalytic subunit | 48701-48743 9:06:02 |                 |
| CCGCCGCCCCCGCAGCCTCGTCGTCCGTGCCGCGTCGGCGCC |       |       |       |                                              |                     |                 |
| 48738                                      | 48764 | 45238 | 48978 | CDS product DNA polymerase catalytic subunit | 48738-48764 4:01:01 |                 |
| GGCGCCGTCGGCGTCCAGGCAGCGCGG                |       |       |       |                                              |                     |                 |
| 48776                                      | 48793 | 45238 | 48978 | CDS product DNA polymerase catalytic subunit | 48776-48793 5:02:01 |                 |
| GGAAGGACGAGGCGGCGG                         |       |       |       |                                              |                     |                 |
| 48809                                      | 48837 | 45238 | 48978 | CDS product DNA polymerase catalytic subunit | 48809-48837 7:04:01 |                 |
| CCGCGCGCCCGCCCGCGGCCCGCCGCC                |       |       |       |                                              |                     |                 |
| 48891                                      | 48924 | 45238 | 48978 | CDS product DNA polymerase catalytic subunit | 48891-48924 6:03:01 |                 |
| GGGGGCGCCTCGGCCGCGGGCGCGAGGTACGGG          |       |       |       |                                              |                     |                 |

|                               |       |       |       |                                                 |                      |
|-------------------------------|-------|-------|-------|-------------------------------------------------|----------------------|
| 49234                         | 49253 | 49233 | 52844 | CDS product single-stranded DNA-binding protein | 49234-49253 4:01:01  |
| GGACGCGGCGCCAAGACGG           |       |       |       |                                                 |                      |
| 49445                         | 49469 | 49233 | 52844 | CDS product single-stranded DNA-binding protein | 49445-49469 5:02:01  |
| GGCCTGGGTGGCGGGGCTGACGG       |       |       |       |                                                 |                      |
| 49481                         | 49497 | 49233 | 52844 | CDS product single-stranded DNA-binding protein | 49481-49497 4:01:01  |
| CCCAGCCACTACCACCC             |       |       |       |                                                 |                      |
| 49528                         | 49556 | 49233 | 52844 | CDS product single-stranded DNA-binding protein | 49528-49556 5:02:01  |
| CCTGCGCGCCAGCACGGCCGCGCCAAACC |       |       |       |                                                 |                      |
| 49708                         | 49727 | 49233 | 52844 | CDS product single-stranded DNA-binding protein | 49708-49727 4:01:01  |
| GGAGGCTTTCAAGGAGACGG          |       |       |       |                                                 |                      |
| 49780                         | 49796 | 49233 | 52844 | CDS product single-stranded DNA-binding protein | 49780-49796 4:01:01  |
| GGGCGCCGGCGAGGCGG             |       |       |       |                                                 |                      |
| 49957                         | 49973 | 49233 | 52844 | CDS product single-stranded DNA-binding protein | 49957-49973 4:01:01  |
| GGGCCCCGCCGCGGTGG             |       |       |       |                                                 |                      |
| 50095                         | 50116 | 49233 | 52844 | CDS product single-stranded DNA-binding protein | 50095-50116 5:02:01  |
| GGGGCGCGGTGGCGCCGCGGG         |       |       |       |                                                 |                      |
| 50126                         | 50150 | 49233 | 52844 | CDS product single-stranded DNA-binding protein | 50126-50150 5:02:01  |
| GGCGCGGACCCGGGCGGCGCAAGG      |       |       |       |                                                 |                      |
| 50178                         | 50207 | 49233 | 52844 | CDS product single-stranded DNA-binding protein | 50178-50207 7:04:01  |
| GGCTGGCCTCGGTGATGGCGGCGACACGG |       |       |       |                                                 |                      |
| 50398                         | 50420 | 49233 | 52844 | CDS product single-stranded DNA-binding protein | 50398-50420 6:03:01  |
| GGAGGTGGACGACGGCGGCGCGG       |       |       |       |                                                 |                      |
| 50439                         | 50496 | 49233 | 52844 | CDS product single-stranded DNA-binding protein | 50439-50496 11:08:02 |

|       |       |       |       |                                                           |                     |
|-------|-------|-------|-------|-----------------------------------------------------------|---------------------|
|       |       |       |       | CCGCCGCCGGCTTCCACCGCTTCTACCAGATCGCCGCCCCCTACGCTGCCGGAACCC |                     |
| 50519 | 50548 | 49233 | 52844 | CDS product single-stranded DNA-binding protein           | 50519-50548 6:03:01 |
|       |       |       |       | CCGCTGCCGCAGACCGGCGCCGGTCCGGCC                            |                     |
| 50584 | 50608 | 49233 | 52844 | CDS product single-stranded DNA-binding protein           | 50584-50608 4:01:01 |
|       |       |       |       | GGACCACCTGGCGCTGGCGTGCGGG                                 |                     |
| 50790 | 50817 | 49233 | 52844 | CDS product single-stranded DNA-binding protein           | 50790-50817 5:02:01 |
|       |       |       |       | GGCTGCGGCACCGGCTGCCCCGGTTTG                               |                     |
| 51258 | 51278 | 49233 | 52844 | CDS product single-stranded DNA-binding protein           | 51258-51278 4:01:01 |
|       |       |       |       | GGCGCTCGGTGCTGGCCGTGG                                     |                     |
| 51320 | 51337 | 49233 | 52844 | CDS product single-stranded DNA-binding protein           | 51320-51337 4:01:01 |
|       |       |       |       | GGGCAGCCGGTGGACGGG                                        |                     |
| 51439 | 51455 | 49233 | 52844 | CDS product single-stranded DNA-binding protein           | 51439-51455 4:01:01 |
|       |       |       |       | GGAGGCCGCGGTCGCGG                                         |                     |
| 51520 | 51542 | 49233 | 52844 | CDS product single-stranded DNA-binding protein           | 51520-51542 4:01:01 |
|       |       |       |       | GGTAAGCCTGGAGGTCTTCAAGG                                   |                     |
| 51731 | 51758 | 49233 | 52844 | CDS product single-stranded DNA-binding protein           | 51731-51758 6:03:01 |
|       |       |       |       | CCGCCCGGAGCCCGACGCCCAACCCCC                               |                     |
| 51974 | 52006 | 49233 | 52844 | CDS product single-stranded DNA-binding protein           | 51974-52006 5:02:01 |
|       |       |       |       | GGGCTCACGGCGATCGTGGCCGGGCGCGACGG                          |                     |
| 52061 | 52081 | 49233 | 52844 | CDS product single-stranded DNA-binding protein           | 52061-52081 4:01:01 |
|       |       |       |       | CCCACGCCGCGGCGGCCGCC                                      |                     |
| 52072 | 52088 | 49233 | 52844 | CDS product single-stranded DNA-binding protein           | 52072-52088 4:01:01 |
|       |       |       |       | GGCGGCCGCCGAGGAGG                                         |                     |

|                                                          |       |       |       |                                                 |                                   |
|----------------------------------------------------------|-------|-------|-------|-------------------------------------------------|-----------------------------------|
| 52099                                                    | 52128 | 49233 | 52844 | CDS product single-stranded DNA-binding protein | 52099-52128 7:04:01               |
| GGCGGAGGCCCGCCCGAGGTGTGGGCGGG                            |       |       |       |                                                 |                                   |
| 52131                                                    | 52148 | 49233 | 52844 | CDS product single-stranded DNA-binding protein | 52131-52148 4:01:01               |
| CCTTCGCCGCCAGCAACC                                       |       |       |       |                                                 |                                   |
| 52159                                                    | 52191 | 49233 | 52844 | CDS product single-stranded DNA-binding protein | 52159-52191 5:02:01               |
| GGTCATGGCCACGCGGCCCGGTAGTGCTGGG                          |       |       |       |                                                 |                                   |
| 52243                                                    | 52272 | 49233 | 52844 | CDS product single-stranded DNA-binding protein | 52243-52272 6:03:01               |
| GGCGGGCAACTGGAGCGGCCTCAACGGGGG                           |       |       |       |                                                 |                                   |
| 52421                                                    | 52448 | 49233 | 52844 | CDS product single-stranded DNA-binding protein | 52421-52448 4:01:01               |
| GGCAGCAACGGCGCGCTGGCGCAGACGG                             |       |       |       |                                                 |                                   |
| 52489                                                    | 52529 | 49233 | 52844 | CDS product single-stranded DNA-binding protein | 52489-52529 8:05:02               |
| GGAGCACATGGACCTGGACGACTGGGCGGCCCTGGTGGAGG                |       |       |       |                                                 |                                   |
| 52552                                                    | 52610 | 49233 | 52844 | CDS product single-stranded DNA-binding protein | 52552-52610 11:08:02              |
| GGTGGAGCTGACGGAGCGCGGCCCGCGCGCCCGGGGATGGTCGCCGGAGGGCGCGG |       |       |       |                                                 |                                   |
| 52630                                                    | 52652 | 49233 | 52844 | CDS product single-stranded DNA-binding protein | 52630-52652 5:02:01               |
| GGAGCTCGAGGCGCGGCCGAGG                                   |       |       |       |                                                 |                                   |
| 52724                                                    | 52747 | 49233 | 52844 | CDS product single-stranded DNA-binding protein | 52724-52747 5:02:01               |
| GGCGGCCCGTGGCCGGGGCCGGG                                  |       |       |       |                                                 |                                   |
| 52729                                                    | 52778 | 49233 | 52844 | CDS product single-stranded DNA-binding protein | 52729-52778 9:06:02               |
| CCCCGTGGCCGGGGCCGGGCCCGCGCCTGGAGCCAAGCGCCCCGACC          |       |       |       |                                                 |                                   |
| 53095                                                    | 53116 | 53058 | 55538 | CDS product DNA packaging terminase subunit 2   | 53095-53116 4:01:01               |
| CCTCGGCTCCGAGCCTGGCCCC                                   |       |       |       |                                                 |                                   |
| 53153                                                    | 53165 | 53058 | 55538 | CDS product DNA packaging terminase subunit 2   | 53153-53165 4:01:01 GGCGGGGCGGCGG |

|                                            |       |       |       |                                               |                                      |
|--------------------------------------------|-------|-------|-------|-----------------------------------------------|--------------------------------------|
| 53257                                      | 53272 | 53058 | 55538 | CDS product DNA packaging terminase subunit 2 | 53257-53272 4:01:01 CCGCCACCTCGACGCC |
| 53607                                      | 53629 | 53058 | 55538 | CDS product DNA packaging terminase subunit 2 | 53607-53629 4:01:01                  |
| CCTCAACCGACGCCGCGCTCGCC                    |       |       |       |                                               |                                      |
| 53658                                      | 53684 | 53058 | 55538 | CDS product DNA packaging terminase subunit 2 | 53658-53684 7:04:01                  |
| GGGCCACGGTGGCGGGCGGGGTGG                   |       |       |       |                                               |                                      |
| 53770                                      | 53783 | 53058 | 55538 | CDS product DNA packaging terminase subunit 2 | 53770-53783 4:01:01 GGGCCGCGGCTGG    |
| 53880                                      | 53924 | 53058 | 55538 | CDS product DNA packaging terminase subunit 2 | 53880-53924 11:08:02                 |
| GGGCGCGGCTGGCGGCGCAGCGGCGGCTGGCGGCGCTGGCGG |       |       |       |                                               |                                      |
| 53938                                      | 53950 | 53058 | 55538 | CDS product DNA packaging terminase subunit 2 | 53938-53950 4:01:01 GGGGGCGGGCGGG    |
| 53978                                      | 53997 | 53058 | 55538 | CDS product DNA packaging terminase subunit 2 | 53978-53997 5:02:01                  |
| GGAGGCGACGGCGACGGCGG                       |       |       |       |                                               |                                      |
| 54037                                      | 54057 | 53058 | 55538 | CDS product DNA packaging terminase subunit 2 | 54037-54057 4:01:01                  |
| CCACGTCTCCGCCCCGGCGCC                      |       |       |       |                                               |                                      |
| 54120                                      | 54155 | 53058 | 55538 | CDS product DNA packaging terminase subunit 2 | 54120-54155 8:05:02                  |
| CCGCCGCCAGCGCCGTCGCCGCCTTCGCCGGAACC        |       |       |       |                                               |                                      |
| 54199                                      | 54215 | 53058 | 55538 | CDS product DNA packaging terminase subunit 2 | 54199-54215 4:01:01                  |
| GGCCGCGGCGGAGATGG                          |       |       |       |                                               |                                      |
| 54259                                      | 54287 | 53058 | 55538 | CDS product DNA packaging terminase subunit 2 | 54259-54287 5:02:01                  |
| GGACAAGCTGGCGCAGCTGGACGGCGTGG              |       |       |       |                                               |                                      |
| 54385                                      | 54407 | 53058 | 55538 | CDS product DNA packaging terminase subunit 2 | 54385-54407 4:01:01                  |
| CCGGCGCCTCAGCGCCCGGACC                     |       |       |       |                                               |                                      |
| 54441                                      | 54465 | 53058 | 55538 | CDS product DNA packaging terminase subunit 2 | 54441-54465 6:03:01                  |
| GGCGGGCGGCCGCGGGCGAGGCGGG                  |       |       |       |                                               |                                      |

|                                                                                                         |       |       |       |                                               |             |          |                     |
|---------------------------------------------------------------------------------------------------------|-------|-------|-------|-----------------------------------------------|-------------|----------|---------------------|
| 54475                                                                                                   | 54495 | 53058 | 55538 | CDS product DNA packaging terminase subunit 2 | 54475-54495 | 5:02:01  |                     |
| GGTTGGCCTCGGCGGCCCGG                                                                                    |       |       |       |                                               |             |          |                     |
| 54526                                                                                                   | 54542 | 53058 | 55538 | CDS product DNA packaging terminase subunit 2 | 54526-54542 | 5:02:01  |                     |
| GGAGGAGGGCGGGACGG                                                                                       |       |       |       |                                               |             |          |                     |
| 54551                                                                                                   | 54659 | 53058 | 55538 | CDS product DNA packaging terminase subunit 2 | 54551-54659 | 23:20:05 |                     |
| GGCGGCGCCGGGGCCGGGTGGGGGCGGTGGGGCGGGCCGTCCGGGGCGCAGACGGCGGGGCGGCGGGAGGACGACGGCCCCGCGGGCTGGGCGGCGCTGGCGG |       |       |       |                                               |             |          |                     |
| 54850                                                                                                   | 54865 | 53058 | 55538 | CDS product DNA packaging terminase subunit 2 | 54850-54865 | 4:01:01  | CCGCGCCTTCGCGCC     |
| 54871                                                                                                   | 54893 | 53058 | 55538 | CDS product DNA packaging terminase subunit 2 | 54871-54893 | 5:02:01  |                     |
| GGCGAGCGGGCACGGTGGTGG                                                                                   |       |       |       |                                               |             |          |                     |
| 54898                                                                                                   | 54916 | 53058 | 55538 | CDS product DNA packaging terminase subunit 2 | 54898-54916 | 4:01:01  |                     |
| CCGCGCCTCGGACGCCACC                                                                                     |       |       |       |                                               |             |          |                     |
| 55138                                                                                                   | 55163 | 53058 | 55538 | CDS product DNA packaging terminase subunit 2 | 55138-55163 | 7:04:01  |                     |
| GGCGCCGCGGGGGCGGGTGGGCGG                                                                                |       |       |       |                                               |             |          |                     |
| 55321                                                                                                   | 55351 | 53058 | 55538 | CDS product DNA packaging terminase subunit 2 | 55321-55351 | 6:03:01  |                     |
| GGACCGAACGGCGCCGGGCCCGGACGGGCGG                                                                         |       |       |       |                                               |             |          |                     |
| 55425                                                                                                   | 55448 | 53058 | 55538 | CDS product DNA packaging terminase subunit 2 | 55425-55448 | 5:02:01  |                     |
| GGGCGCCGAGACGGTCGGCGAGG                                                                                 |       |       |       |                                               |             |          |                     |
| 55609                                                                                                   | 55677 | 55394 | 58192 | CDS product envelope glycoprotein B           | 55609-55677 | 13:10:03 |                     |
| CCCCCGGCGCCCCGCCGAAGAGGCGGAGCCCGGCGCCCCCGGAGCCCCAGCCCCCGGCCCC                                           |       |       |       |                                               |             |          |                     |
| 55776                                                                                                   | 55794 | 55394 | 58192 | CDS product envelope glycoprotein B           | 55776-55794 | 4:01:01  | CCCGCCGCCCTCGGGCGCC |
| 55788                                                                                                   | 55806 | 55394 | 58192 | CDS product envelope glycoprotein B           | 55788-55806 | 4:01:01  | GGGCGCCACGGTGGTCCGG |
| 56074                                                                                                   | 56089 | 55394 | 58192 | CDS product envelope glycoprotein B           | 56074-56089 | 4:01:01  | GGGCGCAAGGTGGTGG    |
| 56190                                                                                                   | 56208 | 55394 | 58192 | CDS product envelope glycoprotein B           | 56190-56208 | 4:01:01  | GGCGCTGGGCTCGGCGGGG |

|                                                        |       |       |       |                                     |
|--------------------------------------------------------|-------|-------|-------|-------------------------------------|
| 56244                                                  | 56266 | 55394 | 58192 | CDS product envelope glycoprotein B |
| 56523                                                  | 56542 | 55394 | 58192 | CDS product envelope glycoprotein B |
| 56864                                                  | 56888 | 55394 | 58192 | CDS product envelope glycoprotein B |
| 56901                                                  | 56930 | 55394 | 58192 | CDS product envelope glycoprotein B |
| CCGCGCCGCGCCGTCTGCGCCCGGCGGCC                          |       |       |       |                                     |
| 56923                                                  | 56977 | 55394 | 58192 | CDS product envelope glycoprotein B |
| GGCGGCCCGGCGCGCCAACGGGCCCGCGGACGGCGACGCCGGCGGGCGGG     |       |       |       |                                     |
| 57020                                                  | 57040 | 55394 | 58192 | CDS product envelope glycoprotein B |
| 57060                                                  | 57082 | 55394 | 58192 | CDS product envelope glycoprotein B |
| 57162                                                  | 57174 | 55394 | 58192 | CDS product envelope glycoprotein B |
| 57282                                                  | 57303 | 55394 | 58192 | CDS product envelope glycoprotein B |
| 57324                                                  | 57346 | 55394 | 58192 | CDS product envelope glycoprotein B |
| 57382                                                  | 57397 | 55394 | 58192 | CDS product envelope glycoprotein B |
| 57654                                                  | 57676 | 55394 | 58192 | CDS product envelope glycoprotein B |
| 57708                                                  | 57761 | 55394 | 58192 | CDS product envelope glycoprotein B |
| GGGCCTGGGCGCCGTCGGGCAGGCGGTGGGCACGGTGGTGCTGGGCGCCGCGGG |       |       |       |                                     |
| 57814                                                  | 57838 | 55394 | 58192 | CDS product envelope glycoprotein B |
| 57884                                                  | 57903 | 55394 | 58192 | CDS product envelope glycoprotein B |
| 57969                                                  | 57985 | 55394 | 58192 | CDS product envelope glycoprotein B |
| 58732                                                  | 58768 | 58678 | 59604 | CDS product capsid scaffold protein |
| GGCGGTTGGGCGGGCGGAGGCTGGCCATGGCGCTGG                   |       |       |       |                                     |
| 58772                                                  | 58808 | 58678 | 59604 | CDS product capsid scaffold protein |
| CCACCGTCGCGGCCACCCGGGCTCCTCCGGCGGCC                    |       |       |       |                                     |

|             |          |                           |
|-------------|----------|---------------------------|
| 56244-56266 | 4:01:01  | GGAAGAAGTGGAGGCGCGCTCGG   |
| 56523-56542 | 4:01:01  | GGCCAAGTGGCGCGAGGCGG      |
| 56864-56888 | 5:02:01  | CCGCCGCGGCGCCCAAGCCGGGCCC |
| 56901-56930 | 5:02:01  |                           |
| 56923-56977 | 10:07:02 |                           |
| 57020-57040 | 4:01:01  | CCTACGACCACATCCAGGACC     |
| 57060-57082 | 5:02:01  | CCGCCTGGCCACGTCCTGGTGCC   |
| 57162-57174 | 4:01:01  | CCGCCGCGCCGCC             |
| 57282-57303 | 5:02:01  | CCGCCCGCCGGTCTCCTTTGCC    |
| 57324-57346 | 5:02:01  | GGTGGAGGGCCAGCTCGGCGAGG   |
| 57382-57397 | 4:01:01  | CCCTGCACCGCCAACC          |
| 57654-57676 | 4:01:01  | GGTCAAGACGGACGGCAATATGG   |
| 57708-57761 | 10:07:02 |                           |
| 57814-57838 | 4:01:01  | GGCGGCTGGCCACGGGGCTGCTGG  |
| 57884-57903 | 4:01:01  | CCCGCCTCCGAGCAACCCC       |
| 57969-57985 | 4:01:01  | GGGCGAGGAAGAGGAGG         |
| 58732-58768 | 9:06:02  |                           |
| 58772-58808 | 7:04:01  |                           |



|                                                      |       |       |       |                                        |
|------------------------------------------------------|-------|-------|-------|----------------------------------------|
| 58782                                                | 58805 | 58678 | 59604 | CDS product capsid scaffold protein    |
| 58815                                                | 58838 | 58678 | 59604 | CDS product capsid scaffold protein    |
| 58868                                                | 58887 | 58678 | 59604 | CDS product capsid scaffold protein    |
| 58876                                                | 58914 | 58678 | 59604 | CDS product capsid scaffold protein    |
| GGCGCCTGGGCCGGTGCAGGGTCGGCACTTGGGCCGGG               |       |       |       |                                        |
| 58910                                                | 58927 | 58678 | 59604 | CDS product capsid scaffold protein    |
| 58998                                                | 59020 | 58678 | 59604 | CDS product capsid scaffold protein    |
| 59052                                                | 59074 | 58678 | 59604 | CDS product capsid scaffold protein    |
| 59089                                                | 59141 | 58678 | 59604 | CDS product capsid scaffold protein    |
| GGTGGCGGGTGGCGCGCGGAGGAGAGTGGTGGTGAGGCGGCAGCTCGGCTGG |       |       |       |                                        |
| 59179                                                | 59195 | 58678 | 59604 | CDS product capsid scaffold protein    |
| 59207                                                | 59232 | 58678 | 59604 | CDS product capsid scaffold protein    |
| 59229                                                | 59253 | 58678 | 59604 | CDS product capsid scaffold protein    |
| 59254                                                | 59279 | 58678 | 59604 | CDS product capsid scaffold protein    |
| 59297                                                | 59323 | 58678 | 59604 | CDS product capsid scaffold protein    |
| 59368                                                | 59392 | 58678 | 59604 | CDS product capsid scaffold protein    |
| 59386                                                | 59406 | 58678 | 59604 | CDS product capsid scaffold protein    |
| 59407                                                | 59447 | 58678 | 59604 | CDS product capsid scaffold protein    |
| GGCATCGGGGGCGGAGCGGCGGCGGCAGCGGCGGCGGCCGG            |       |       |       |                                        |
| 59458                                                | 59479 | 58678 | 59604 | CDS product capsid scaffold protein    |
| 59604                                                | 59652 | 58678 | 60543 | CDS product capsid maturation protease |
| GGCAGGCGGTGGGGGCGGCGGGGCGGTGCCGGCGGAAGCTCTGGCTGG     |       |       |       |                                        |
| 59906                                                | 59935 | 58678 | 60543 | CDS product capsid maturation protease |

|             |          |                            |
|-------------|----------|----------------------------|
| 58782-58805 | 4:01:01  | GGCCACCCCGGGCTCCTCCGGCGG   |
| 58815-58838 | 5:02:01  | GGCGGCGGCCGCGACGGTCGCTGG   |
| 58868-58887 | 4:01:01  | CCTGCGCCGGCGCCTGGGCC       |
| 58876-58914 | 7:04:01  |                            |
| 58910-58927 | 4:01:01  | CCGGGCCCCGACCTACCC         |
| 58998-59020 | 4:01:01  | GGCAGGACCGTAGGGGTAGCCGG    |
| 59052-59074 | 5:02:01  | GGACACGGCGGAGCGAGCTTGG     |
| 59089-59141 | 13:10:03 |                            |
| 59179-59195 | 5:02:01  | CCGCCGCCGCTCCGGCC          |
| 59207-59232 | 4:01:01  | CCCAGTTGTACCGGCGCCGCTTGCC  |
| 59229-59253 | 7:04:01  | GGCCAGGGGGCGGCGGTCCAGGGGG  |
| 59254-59279 | 5:02:01  | CCGTCGTAGCCCGAGCCGTCCGCGCC |
| 59297-59323 | 5:02:01  | GGCCGTGCGCGATGGCGCCGCCAGGG |
| 59368-59392 | 5:02:01  | GGGTGCCAGGGCGGCGCCGCGCGG   |
| 59386-59406 | 4:01:01  | CCGGCGGCGCCGTACCAGCCC      |
| 59407-59447 | 11:08:02 |                            |
| 59458-59479 | 6:03:01  | GGAGCCGGCGGAGGCGGCGCGG     |
| 59604-59652 | 13:10:03 |                            |
| 59906-59935 | 5:02:01  |                            |

|                                 |       |       |       |                                                 |                                         |
|---------------------------------|-------|-------|-------|-------------------------------------------------|-----------------------------------------|
| GGGGCACCGGCCAGGCGCGTCGCCGAGGG   |       |       |       |                                                 |                                         |
| 59958                           | 59971 | 58678 | 60543 | CDS product capsid maturation protease          | 59958-59971 4:01:01 GGCGAGGAGGGCGG      |
| 60355                           | 60374 | 58678 | 60543 | CDS product capsid maturation protease          | 60355-60374 5:02:01 GGCAGCGGGCGGCGGGCGG |
| 60780                           | 60793 | 60602 | 62398 | CDS product DNA packaging tegument protein UL25 | 60780-60793 4:01:01 CCGCCACGACCTCC      |
| 60799                           | 60823 | 60602 | 62398 | CDS product DNA packaging tegument protein UL25 | 60799-60823 6:03:01                     |
| GGGCGCGGGCGGGCGCGGTGGCGG        |       |       |       |                                                 |                                         |
| 61052                           | 61083 | 60602 | 62398 | CDS product DNA packaging tegument protein UL25 | 61052-61083 5:02:01                     |
| CCCACGGCGCGTCGAGGCCGCCATCGGCGCC |       |       |       |                                                 |                                         |
| 61107                           | 61128 | 60602 | 62398 | CDS product DNA packaging tegument protein UL25 | 61107-61128 4:01:01                     |
| CCGCCCCGGGCACCAGCGTGCC          |       |       |       |                                                 |                                         |
| 61182                           | 61205 | 60602 | 62398 | CDS product DNA packaging tegument protein UL25 | 61182-61205 5:02:01                     |
| GGCGGCGCACCAGGAGCAAGGCGG        |       |       |       |                                                 |                                         |
| 61239                           | 61258 | 60602 | 62398 | CDS product DNA packaging tegument protein UL25 | 61239-61258 4:01:01                     |
| GGTCCTCGGCGAGGAAAAGG            |       |       |       |                                                 |                                         |
| 61347                           | 61368 | 60602 | 62398 | CDS product DNA packaging tegument protein UL25 | 61347-61368 5:02:01                     |
| CCGCGCCGCCCGCTAGCGCGCC          |       |       |       |                                                 |                                         |
| 61448                           | 61462 | 60602 | 62398 | CDS product DNA packaging tegument protein UL25 | 61448-61462 4:01:01 CCCGCGCCGCCGCC      |
| 61540                           | 61570 | 60602 | 62398 | CDS product DNA packaging tegument protein UL25 | 61540-61570 5:02:01                     |
| GGCGCGGGCCAGGGCGTCCAGGTACGCCGGG |       |       |       |                                                 |                                         |
| 61618                           | 61639 | 60602 | 62398 | CDS product DNA packaging tegument protein UL25 | 61618-61639 4:01:01                     |
| GGCAACGGCACGGTGCGCGAGG          |       |       |       |                                                 |                                         |
| 61716                           | 61732 | 60602 | 62398 | CDS product DNA packaging tegument protein UL25 | 61716-61732 5:02:01                     |
| CCGCCACCGCGGCCGCC               |       |       |       |                                                 |                                         |

|                                                           |       |       |       |                                                 |             |          |
|-----------------------------------------------------------|-------|-------|-------|-------------------------------------------------|-------------|----------|
| 61844                                                     | 61860 | 60602 | 62398 | CDS product DNA packaging tegument protein UL25 | 61844-61860 | 5:02:01  |
| CCCGCCGACCCCCGCC                                          |       |       |       |                                                 |             |          |
| 61890                                                     | 61907 | 60602 | 62398 | CDS product DNA packaging tegument protein UL25 | 61890-61907 | 5:02:01  |
| GGTCGGCGGCCAGGGTGG                                        |       |       |       |                                                 |             |          |
| 61976                                                     | 61999 | 60602 | 62398 | CDS product DNA packaging tegument protein UL25 | 61976-61999 | 7:04:01  |
| CCCGCGCCGCGCCCCCTCTCC                                     |       |       |       |                                                 |             |          |
| 62008                                                     | 62027 | 60602 | 62398 | CDS product DNA packaging tegument protein UL25 | 62008-62027 | 4:01:01  |
| GGCGGCGCGGCCCGCGCGGG                                      |       |       |       |                                                 |             |          |
| 62018                                                     | 62083 | 60602 | 62398 | CDS product DNA packaging tegument protein UL25 | 62018-62083 | 15:12:03 |
| CCCGCGGGGCGGACTCCGCCCGCGTCCGCCTCTCCGCCGCGCGCCCTCTCCAGGTCC |       |       |       |                                                 |             |          |
| 62100                                                     | 62116 | 60602 | 62398 | CDS product DNA packaging tegument protein UL25 | 62100-62116 | 5:02:01  |
| CCTCCGCCACCCGGGCC                                         |       |       |       |                                                 |             |          |
| 62181                                                     | 62213 | 60602 | 62398 | CDS product DNA packaging tegument protein UL25 | 62181-62213 | 6:03:01  |
| CCGCGCCGCTGCCGCGCCTGGTTCCGCGCCC                           |       |       |       |                                                 |             |          |
| 62386                                                     | 62412 | 62380 | 63261 | CDS product nuclear protein UL24                | 62386-62412 | 5:02:01  |
| CCCGAGCGCCATGGCCCCGATGCCGCC                               |       |       |       |                                                 |             |          |
| 62434                                                     | 62454 | 62380 | 63261 | CDS product nuclear protein UL24                | 62434-62454 | 4:01:01  |
| CCCAGGCACGCCGCGCCGCC                                      |       |       |       |                                                 |             |          |
| 62488                                                     | 62532 | 62380 | 63261 | CDS product nuclear protein UL24                | 62488-62532 | 8:05:02  |
| CCCGCGTGCTGCTGCCGCCACCGGGCGGCCGCTCTCCCGGCC                |       |       |       |                                                 |             |          |
| 62539                                                     | 62575 | 62380 | 63261 | CDS product nuclear protein UL24                | 62539-62575 | 8:05:02  |
| GGGCCGGGGTCGCCGCGGGCGGCCGCGGGTGGCGG                       |       |       |       |                                                 |             |          |
| 62576                                                     | 62601 | 62380 | 63261 | CDS product nuclear protein UL24                | 62576-62601 | 5:02:01  |
| CCACAGCCGCCCTTTTGCCCGTAGCC                                |       |       |       |                                                 |             |          |
| 62616                                                     | 62635 | 62380 | 63261 | CDS product nuclear protein UL24                | 62616-62635 | 4:01:01  |
| CCCCTTCTGCCGCGCGGCC                                       |       |       |       |                                                 |             |          |
| 62830                                                     | 62863 | 62380 | 63261 | CDS product nuclear protein UL24                | 62830-62863 | 6:03:01  |

|                                                      |       |       |       |                                  |                                                   |
|------------------------------------------------------|-------|-------|-------|----------------------------------|---------------------------------------------------|
| GGCGCTAGGACCACCGGTCTGGGCCCGGGGGG                     |       |       |       |                                  |                                                   |
| 62993                                                | 63019 | 62380 | 63261 | CDS product nuclear protein UL24 | 62993-63019 5:02:01 CCCGGGCGTGCCTGCCTCCGCGACCC    |
| 63101                                                | 63123 | 62380 | 63261 | CDS product nuclear protein UL24 | 63101-63123 4:01:01 CCTCCGGGCGCCAAACTTGCCC        |
| 63203                                                | 63231 | 62380 | 63261 | CDS product nuclear protein UL24 | 63203-63231 5:02:01                               |
| GGCTGTGGCACCGGATCCCGCGCGCAGG                         |       |       |       |                                  |                                                   |
| 63303                                                | 63323 | 63260 | 64339 | CDS product thymidine kinase     | 63303-63323 4:01:01 GGACGGCGCGCACGGGTGGG          |
| 63493                                                | 63508 | 63260 | 64339 | CDS product thymidine kinase     | 63493-63508 4:01:01 GGCGCCGGCGGGCCGG              |
| 63525                                                | 63541 | 63260 | 64339 | CDS product thymidine kinase     | 63525-63541 4:01:01 GGACGGCGCGGCCCTGG             |
| 63613                                                | 63629 | 63260 | 64339 | CDS product thymidine kinase     | 63613-63629 4:01:01 CCGCCTGGGCCGGCGCC             |
| 63619                                                | 63635 | 63260 | 64339 | CDS product thymidine kinase     | 63619-63635 4:01:01 GGGCCGGCGCCGGGCGG             |
| 63657                                                | 63709 | 63260 | 64339 | CDS product thymidine kinase     | 63657-63709 9:06:02                               |
| CCGCCACCCCGTGGCCGCGTGCCTCTGCTACCCCTTCGCCGCTACTGCCTCC |       |       |       |                                  |                                                   |
| 63746                                                | 63778 | 63260 | 64339 | CDS product thymidine kinase     | 63746-63778 7:04:01                               |
| CCGCCATGCCCCGGAAGCGCCCGGGGCAACC                      |       |       |       |                                  |                                                   |
| 63791                                                | 63804 | 63260 | 64339 | CDS product thymidine kinase     | 63791-63804 4:01:01 CCCTCCCCCGGCC                 |
| 63822                                                | 63842 | 63260 | 64339 | CDS product thymidine kinase     | 63822-63842 5:02:01 GGCGGCGGGGCCAGGCCCGG          |
| 63924                                                | 63967 | 63260 | 64339 | CDS product thymidine kinase     | 63924-63967 8:05:02                               |
| GGGGGGCGCATGGCGCGACGGCTGGGACGCGCTGGAGTGGGCGG         |       |       |       |                                  |                                                   |
| 64083                                                | 64097 | 63260 | 64339 | CDS product thymidine kinase     | 64083-64097 4:01:01 GGGCGGCGGGACGGG               |
| 64118                                                | 64139 | 63260 | 64339 | CDS product thymidine kinase     | 64118-64139 4:01:01 GGGCGCTGGACGCCCTGGCCGG        |
| 64130                                                | 64153 | 63260 | 64339 | CDS product thymidine kinase     | 64130-64153 6:03:01 CCCTGGCCGGCCGCTCGCCGCCC       |
| 64245                                                | 64259 | 63260 | 64339 | CDS product thymidine kinase     | 64245-64259 4:01:01 GGACGGGCGGGCGG                |
| 64302                                                | 64331 | 63260 | 64339 | CDS product thymidine kinase     | 64302-64331 7:04:01 GGCGGGGAGGCCACGGCGGGCCCTAGGGG |

|       |       |       |       |                                     |
|-------|-------|-------|-------|-------------------------------------|
| 64506 | 64529 | 64455 | 66983 | CDS product envelope glycoprotein H |
| 64532 | 64545 | 64455 | 66983 | CDS product envelope glycoprotein H |
| 64590 | 64616 | 64455 | 66983 | CDS product envelope glycoprotein H |
| 64632 | 64650 | 64455 | 66983 | CDS product envelope glycoprotein H |
| 64900 | 64919 | 64455 | 66983 | CDS product envelope glycoprotein H |
| 64962 | 64983 | 64455 | 66983 | CDS product envelope glycoprotein H |
| 65002 | 65015 | 64455 | 66983 | CDS product envelope glycoprotein H |
| 65182 | 65205 | 64455 | 66983 | CDS product envelope glycoprotein H |
| 65318 | 65343 | 64455 | 66983 | CDS product envelope glycoprotein H |
| 65366 | 65387 | 64455 | 66983 | CDS product envelope glycoprotein H |
| 65508 | 65564 | 64455 | 66983 | CDS product envelope glycoprotein H |

CCGCGCGCCGCGGACCGAGCGCCGGCCCCGCGCCCAACGCTGCCTACCACGCGTACC

|       |       |       |       |                                     |
|-------|-------|-------|-------|-------------------------------------|
| 65565 | 65583 | 64455 | 66983 | CDS product envelope glycoprotein H |
| 65608 | 65625 | 64455 | 66983 | CDS product envelope glycoprotein H |
| 65889 | 65915 | 64455 | 66983 | CDS product envelope glycoprotein H |
| 66069 | 66091 | 64455 | 66983 | CDS product envelope glycoprotein H |
| 66085 | 66110 | 64455 | 66983 | CDS product envelope glycoprotein H |
| 66125 | 66150 | 64455 | 66983 | CDS product envelope glycoprotein H |
| 66252 | 66278 | 64455 | 66983 | CDS product envelope glycoprotein H |
| 66284 | 66305 | 64455 | 66983 | CDS product envelope glycoprotein H |
| 66313 | 66356 | 64455 | 66983 | CDS product envelope glycoprotein H |

GGCGGCGCTCGGCATGCTGGGCCGGGAGGCCTCTTCGGCCCGG

|       |       |       |       |                                     |
|-------|-------|-------|-------|-------------------------------------|
| 66401 | 66417 | 64455 | 66983 | CDS product envelope glycoprotein H |
|-------|-------|-------|-------|-------------------------------------|

|             |         |                            |
|-------------|---------|----------------------------|
| 64506-64529 | 6:03:01 | CCGCGGGCGCCCCCGCCGCCGCC    |
| 64532-64545 | 4:01:01 | GGCGGCGCGGGGGG             |
| 64590-64616 | 6:03:01 | GGGAAATGGTGGTCGAGCCGGGCCGG |
| 64632-64650 | 4:01:01 | CCATCCGCTGCCTCGGGCC        |
| 64900-64919 | 5:02:01 | CCTGGTGCCGAGCCGCCCCC       |
| 64962-64983 | 5:02:01 | CCGCGCGCCCGCCGCCGCCCC      |
| 65002-65015 | 4:01:01 | GGCGGGCGGGTGG              |
| 65182-65205 | 6:03:01 | GGCTCGGCTGGCGGTGGGGCTCGG   |
| 65318-65343 | 6:03:01 | CCGCCACCCGGGCCCGCGCCGGTCC  |
| 65366-65387 | 4:01:01 | GGCTACGGGAACCTCGCGGTGG     |
| 65508-65564 | 9:06:02 |                            |

|             |         |                            |
|-------------|---------|----------------------------|
| 65565-65583 | 4:01:01 | GGGTCGCGCGCGGCTGGG         |
| 65608-65625 | 4:01:01 | GGGGGCGCTCGCGGACGG         |
| 65889-65915 | 5:02:01 | GGCTGCTGGCCACGGCGTGGTGTCGG |
| 66069-66091 | 4:01:01 | CCGCCGGGCACGCCACGGCGGCC    |
| 66085-66110 | 6:03:01 | GGCGGCCGCGCTGGACCTGGAGGAGG |
| 66125-66150 | 6:03:01 | GGCGGCGCGCCGGGGGGCGACGCGGG |
| 66252-66278 | 5:02:01 | GGGCCGCGCTGGACGCTGGCTGGAGG |
| 66284-66305 | 5:02:01 | CCCGCGCCCGCGCGCCGAACC      |
| 66313-66356 | 8:05:02 |                            |

|             |         |                   |
|-------------|---------|-------------------|
| 66401-66417 | 4:01:01 | GGCGGGTGGGGCGCGGG |
|-------------|---------|-------------------|

|                                      |       |       |       |                                     |
|--------------------------------------|-------|-------|-------|-------------------------------------|
| 66568                                | 66587 | 64455 | 66983 | CDS product envelope glycoprotein H |
| 66592                                | 66612 | 64455 | 66983 | CDS product envelope glycoprotein H |
| 66870                                | 66900 | 64455 | 66983 | CDS product envelope glycoprotein H |
| GGGCGTCGGTAGGCGGGGCGCTGGTCGCGGG      |       |       |       |                                     |
| 67145                                | 67179 | 67133 | 68857 | CDS product tegument protein UL21   |
| CCGGCTCCAGCTTCCCCCTTCTCCCTCCCCTTCGCC |       |       |       |                                     |
| 67226                                | 67244 | 67133 | 68857 | CDS product tegument protein UL21   |
| 67376                                | 67395 | 67133 | 68857 | CDS product tegument protein UL21   |
| 67580                                | 67612 | 67133 | 68857 | CDS product tegument protein UL21   |
| CCGCCCGCGTCTCCGCCGGCGCCGCTTTTCC      |       |       |       |                                     |
| 67701                                | 67720 | 67133 | 68857 | CDS product tegument protein UL21   |
| 67728                                | 67760 | 67133 | 68857 | CDS product tegument protein UL21   |
| GGGGCGCGCGCGCGGTGCGGATAATTGGCGG      |       |       |       |                                     |
| 67883                                | 67911 | 67133 | 68857 | CDS product tegument protein UL21   |
| CCGACAAAGCCGCGCGTCCGCGCGGCC          |       |       |       |                                     |
| 67920                                | 67951 | 67133 | 68857 | CDS product tegument protein UL21   |
| CCGTGCGCGCGGCCACCAAGTCCCCGCGCGCC     |       |       |       |                                     |
| 68071                                | 68095 | 67133 | 68857 | CDS product tegument protein UL21   |
| 68217                                | 68247 | 67133 | 68857 | CDS product tegument protein UL21   |
| CCCCTTCTCCGGCGCGCGCCGAGCCCGCC        |       |       |       |                                     |
| 68281                                | 68304 | 67133 | 68857 | CDS product tegument protein UL21   |
| 68526                                | 68550 | 67133 | 68857 | CDS product tegument protein UL21   |
| 68727                                | 68741 | 67133 | 68857 | CDS product tegument protein UL21   |

|             |         |                            |
|-------------|---------|----------------------------|
| 66568-66587 | 5:02:01 | GGCCAGCGGCGCGGTGGAGG       |
| 66592-66612 | 4:01:01 | CCGCCTTGCGGTCCCCGCCCC      |
| 66870-66900 | 6:03:01 |                            |
| 67145-67179 | 6:03:01 |                            |
| 67226-67244 | 5:02:01 | CCGGCCGCCCAAGCCGCC         |
| 67376-67395 | 4:01:01 | CCAGCGCGGCGAGCCCCGCC       |
| 67580-67612 | 8:05:02 |                            |
| 67701-67720 | 4:01:01 | CCGCGTCCGCGACCGTGCCC       |
| 67728-67760 | 7:04:01 |                            |
| 67883-67911 | 4:01:01 |                            |
| 67920-67951 | 6:03:01 |                            |
| 68071-68095 | 4:01:01 | GGCCCAGGCATTGTAGGTCCGCGGG  |
| 68217-68247 | 6:03:01 |                            |
| 68281-68304 | 5:02:01 | GGGGGCGCACGGGCCGCGCGGGG    |
| 68526-68550 | 5:02:01 | CCGCGCCCCGCGGCCGGGGCCCCGCC |
| 68727-68741 | 4:01:01 | CCGCCTCCCCGCCCC            |

|                                                                                          |       |       |       |                                   |             |          |                            |
|------------------------------------------------------------------------------------------|-------|-------|-------|-----------------------------------|-------------|----------|----------------------------|
| 69033                                                                                    | 69050 | 68969 | 69664 | CDS product envelope protein UL20 | 69033-69050 | 5:02:01  | GGAAGAGGGGCGGCCGG          |
| 69060                                                                                    | 69088 | 68969 | 69664 | CDS product envelope protein UL20 | 69060-69088 | 5:02:01  |                            |
| GGGAGACAGCGGCTCGGACGACGAGGAGG                                                            |       |       |       |                                   |             |          |                            |
| 69117                                                                                    | 69136 | 68969 | 69664 | CDS product envelope protein UL20 | 69117-69136 | 4:01:01  | GGCGTACGGGGCGACGTGG        |
| 69195                                                                                    | 69217 | 68969 | 69664 | CDS product envelope protein UL20 | 69195-69217 | 4:01:01  | GGCGTACGTGGTCTTTGGCGCGG    |
| 69335                                                                                    | 69353 | 68969 | 69664 | CDS product envelope protein UL20 | 69335-69353 | 5:02:01  | GGCTGGCGGCGGCCGCGGG        |
| 69366                                                                                    | 69384 | 68969 | 69664 | CDS product envelope protein UL20 | 69366-69384 | 4:01:01  | GGGCGTGCGGGCGGACCGG        |
| 69394                                                                                    | 69487 | 68969 | 69664 | CDS product envelope protein UL20 | 69394-69487 | 16:13:04 |                            |
| GGGCGCGGGCCTCGGGCGCTGTGGCGGCGTGGTGTGGCGCGCGCGGCTCTTTGCGGCGGTGGCGTGCCGGCGGCCTTTGCGGGCCCCG |       |       |       |                                   |             |          |                            |
| 69510                                                                                    | 69527 | 68969 | 69664 | CDS product envelope protein UL20 | 69510-69527 | 6:03:01  | GGCGGTGGCGGACGGCGG         |
| 69537                                                                                    | 69549 | 68969 | 69664 | CDS product envelope protein UL20 | 69537-69549 | 4:01:01  | GGCGGCGGCGGGG              |
| 69558                                                                                    | 69583 | 68969 | 69664 | CDS product envelope protein UL20 | 69558-69583 | 6:03:01  | GGCCGGGCTGGCGGCGTACACGGCGG |
| 69754                                                                                    | 69771 | 69737 | 73894 | CDS product major capsid protein  | 69754-69771 | 4:01:01  | CCTCCGCGCGCGCCCGCC         |
| 69777                                                                                    | 69794 | 69737 | 73894 | CDS product major capsid protein  | 69777-69794 | 4:01:01  | GGGCGGGCTGGTCTCCGG         |
| 69945                                                                                    | 69964 | 69737 | 73894 | CDS product major capsid protein  | 69945-69964 | 4:01:01  | GGAGCTCGGGCTCTCGGTGG       |
| 70057                                                                                    | 70077 | 69737 | 73894 | CDS product major capsid protein  | 70057-70077 | 4:01:01  | CCACATCCGGTGGACCAGCCC      |
| 70482                                                                                    | 70516 | 69737 | 73894 | CDS product major capsid protein  | 70482-70516 | 6:03:01  |                            |
| GGACCTCGTGGGCTGCACGGCCGCGTCGGTGGCGG                                                      |       |       |       |                                   |             |          |                            |
| 70546                                                                                    | 70583 | 69737 | 73894 | CDS product major capsid protein  | 70546-70583 | 7:04:01  |                            |
| GGGCGCCCGGTGGATGGCGTGCTGGTGACGACGGCGGG                                                   |       |       |       |                                   |             |          |                            |
| 70595                                                                                    | 70636 | 69737 | 73894 | CDS product major capsid protein  | 70595-70636 | 8:05:02  |                            |
| GGCTGCTGGGCGCGTGCTGGCGCTGGCCGACTCGGAGGCGG                                                |       |       |       |                                   |             |          |                            |
| 70746                                                                                    | 70783 | 69737 | 73894 | CDS product major capsid protein  | 70746-70783 | 7:04:01  |                            |

|                                                                   |       |       |       |                                  |                                                 |
|-------------------------------------------------------------------|-------|-------|-------|----------------------------------|-------------------------------------------------|
| GGGGCTGGAGGGGACCGCGGGCCCGGGCTGGCCGTGG                             |       |       |       |                                  |                                                 |
| 70821                                                             | 70848 | 69737 | 73894 | CDS product major capsid protein | 70821-70848 6:03:01 GGCGGACCTGGTGGCCGTGGGGACCGG |
| 71002                                                             | 71024 | 69737 | 73894 | CDS product major capsid protein | 71002-71024 5:02:01 CCGCCGCCCCGGGCACCCCGACCC    |
| 71130                                                             | 71190 | 69737 | 73894 | CDS product major capsid protein | 71130-71190 12:09:03                            |
| GGACGTGGACCCGGTGCTGGCGGCGCTCGGCCGGCGGCCAGAGGCGAGAGGCGGAGTGG       |       |       |       |                                  |                                                 |
| 71221                                                             | 71250 | 69737 | 73894 | CDS product major capsid protein | 71221-71250 5:02:01                             |
| GGCGAGCAGGAGCTCGCGGACCAGGTGCGG                                    |       |       |       |                                  |                                                 |
| 71322                                                             | 71342 | 69737 | 73894 | CDS product major capsid protein | 71322-71342 4:01:01 GGAACAGATGGTGGCGCCCGG       |
| 71413                                                             | 71432 | 69737 | 73894 | CDS product major capsid protein | 71413-71432 5:02:01 CCAGGGCCACCCAACCCACC        |
| 71562                                                             | 71585 | 69737 | 73894 | CDS product major capsid protein | 71562-71585 6:03:01 GGCAACGGTGGCGGCGGTGCGCGG    |
| 71793                                                             | 71824 | 69737 | 73894 | CDS product major capsid protein | 71793-71824 5:02:01                             |
| GGACTGCACGGCGGTCTACAAGGACCTGCTGG                                  |       |       |       |                                  |                                                 |
| 71928                                                             | 71945 | 69737 | 73894 | CDS product major capsid protein | 71928-71945 4:01:01 CCCGGTGCTTCCGCCGCC          |
| 71984                                                             | 72001 | 69737 | 73894 | CDS product major capsid protein | 71984-72001 4:01:01 GGCGGACCCGGCGCGCGG          |
| 72112                                                             | 72136 | 69737 | 73894 | CDS product major capsid protein | 72112-72136 5:02:01 GGCGGCGGCCCCGGGGCGTACCCGG   |
| 72258                                                             | 72280 | 69737 | 73894 | CDS product major capsid protein | 72258-72280 4:01:01 GGTGCAGTCGGTCGTGGTGCCGG     |
| 72301                                                             | 72363 | 69737 | 73894 | CDS product major capsid protein | 72301-72363 10:07:02                            |
| CCGCCCCGCGGGCCCCGAGCACCCGCGCCACCCGCTGCACCCGACGAACCTGGTGGCCAACCTCC |       |       |       |                                  |                                                 |
| 72393                                                             | 72406 | 69737 | 73894 | CDS product major capsid protein | 72393-72406 4:01:01 GGCGGTGGACGCGG              |
| 72431                                                             | 72456 | 69737 | 73894 | CDS product major capsid protein | 72431-72456 4:01:01 CCGTGACCAACATGGCCGAGCGCACC  |
| 72459                                                             | 72479 | 69737 | 73894 | CDS product major capsid protein | 72459-72479 6:03:01 GGTGGTGGTGGTGGACGCGGG       |
| 72635                                                             | 72649 | 69737 | 73894 | CDS product major capsid protein | 72635-72649 4:01:01 CCTGCCCGGACCACC             |
| 72993                                                             | 73011 | 69737 | 73894 | CDS product major capsid protein | 72993-73011 5:02:01 GGCGGTGCGCGGCGTCCGG         |



|                                                        |       |       |       |                                      |                      |                            |
|--------------------------------------------------------|-------|-------|-------|--------------------------------------|----------------------|----------------------------|
| 73041                                                  | 73066 | 69737 | 73894 | CDS product major capsid protein     | 73041-73066 5:02:01  | GGACCTCGGCGTGGGCTACACGGCGG |
| 73067                                                  | 73083 | 69737 | 73894 | CDS product major capsid protein     | 73067-73083 4:01:01  | CCTACGCCGCCGCGGCC          |
| 73155                                                  | 73175 | 69737 | 73894 | CDS product major capsid protein     | 73155-73175 4:01:01  | GGTGAACGGGGACGCGGACGG      |
| 73240                                                  | 73259 | 69737 | 73894 | CDS product major capsid protein     | 73240-73259 4:01:01  | CCCATTATGCCCCGCGGCC        |
| 73260                                                  | 73288 | 69737 | 73894 | CDS product major capsid protein     | 73260-73288 6:03:01  |                            |
| GGCGGGCACGGCGCGGGCAGGCTGCGG                            |       |       |       |                                      |                      |                            |
| 73335                                                  | 73354 | 69737 | 73894 | CDS product major capsid protein     | 73335-73354 4:01:01  | CCGCTCGCCGTGCAACCCCC       |
| 73357                                                  | 73375 | 69737 | 73894 | CDS product major capsid protein     | 73357-73375 4:01:01  | GGGCGCTCGGCAGGCGCGG        |
| 73422                                                  | 73476 | 69737 | 73894 | CDS product major capsid protein     | 73422-73476 10:07:02 |                            |
| CCATGGCCAGGGCGACCCGGCCACCCGCACCGCGCCACCGTTAACCCGTGGGCC |       |       |       |                                      |                      |                            |
| 73575                                                  | 73594 | 69737 | 73894 | CDS product major capsid protein     | 73575-73594 5:02:01  | GGCGGAGGTGTCGGCCAAGG       |
| 73620                                                  | 73634 | 69737 | 73894 | CDS product major capsid protein     | 73620-73634 4:01:01  | GGAGGTGGGCGCGGG            |
| 73773                                                  | 73788 | 69737 | 73894 | CDS product major capsid protein     | 73773-73788 4:01:01  | CCGCCTCGCCGCGCCC           |
| 73789                                                  | 73829 | 69737 | 73894 | CDS product major capsid protein     | 73789-73829 9:06:02  |                            |
| GGCGGCGCGGCCGCGGGCGTCGAGGGCCGGCTGGAGGAGGG              |       |       |       |                                      |                      |                            |
| 73845                                                  | 73865 | 69737 | 73894 | CDS product major capsid protein     | 73845-73865 4:01:01  | CCTGATCCGCGACGCCTCGCC      |
| 74044                                                  | 74057 | 73983 | 74933 | CDS product capsid triplex subunit 2 | 74044-74057 4:01:01  | CCTAGCCGCCCTCC             |
| 74113                                                  | 74129 | 73983 | 74933 | CDS product capsid triplex subunit 2 | 74113-74129 4:01:01  | GGCGGACGTGGCGCTGG          |
| 74178                                                  | 74203 | 73983 | 74933 | CDS product capsid triplex subunit 2 | 74178-74203 5:02:01  |                            |
| CCGCGTACCGCTGCCGGTTCCCGGCC                             |       |       |       |                                      |                      |                            |
| 74368                                                  | 74384 | 73983 | 74933 | CDS product capsid triplex subunit 2 | 74368-74384 4:01:01  | GGCCTCGGCGGGCGCGG          |
| 74431                                                  | 74480 | 73983 | 74933 | CDS product capsid triplex subunit 2 | 74431-74480 9:06:02  |                            |
| GGTGGCGCGCGTGTTGGCGCGCGGTAGAGGCGCTGGGGGACCGCGCGG       |       |       |       |                                      |                      |                            |

|                                                |       |       |       |                                               |                      |                      |
|------------------------------------------------|-------|-------|-------|-----------------------------------------------|----------------------|----------------------|
| 74665                                          | 74684 | 73983 | 74933 | CDS product capsid triplex subunit 2          | 74665-74684 4:01:01  | GGGCCTGCAGGACGGCGTGG |
| 74740                                          | 74757 | 73983 | 74933 | CDS product capsid triplex subunit 2          | 74740-74757 4:01:01  | CCTGGAGCCGGCCGAGCC   |
| 74760                                          | 74776 | 73983 | 74933 | CDS product capsid triplex subunit 2          | 74760-74776 5:02:01  | GGCAGGACGGCGGCCGG    |
| 74792                                          | 74809 | 73983 | 74933 | CDS product capsid triplex subunit 2          | 74792-74809 4:01:01  | GGGGCGCTGGCGGCCTGG   |
| 74818                                          | 74844 | 73983 | 74933 | CDS product capsid triplex subunit 2          | 74818-74844 5:02:01  |                      |
| GGCGACCCGGCTGGGAGACGGGTCGG                     |       |       |       |                                               |                      |                      |
| 75086                                          | 75133 | 75077 | 80655 | CDS product DNA packaging terminase subunit 1 | 75086-75133 10:07:02 |                      |
| GGCGGGCGGGGGCCAGCGGCAGAAGGCGCCGTCGGTGGGCGGGAGG |       |       |       |                                               |                      |                      |
| 75197                                          | 75225 | 75077 | 80655 | CDS product DNA packaging terminase subunit 1 | 75197-75225 5:02:01  |                      |
| CCCAGAAGGCCCGGGCCCCGCCGGGGCC                   |       |       |       |                                               |                      |                      |
| 75205                                          | 75244 | 75077 | 80655 | CDS product DNA packaging terminase subunit 1 | 75205-75244 7:04:01  |                      |
| GGCCCCGGCCCCCGGGGGCCGGGTGCTCTCGGTTAGG          |       |       |       |                                               |                      |                      |
| 75288                                          | 75320 | 75077 | 80655 | CDS product DNA packaging terminase subunit 1 | 75288-75320 6:03:01  |                      |
| GGCGCACGGTCAGCGAGGCCAGGTCCTGGGAGG              |       |       |       |                                               |                      |                      |
| 75348                                          | 75368 | 75077 | 80655 | CDS product DNA packaging terminase subunit 1 | 75348-75368 4:01:01  |                      |
| GGATGAAGTGGTCAAAGGCGG                          |       |       |       |                                               |                      |                      |
| 75418                                          | 75433 | 75077 | 80655 | CDS product DNA packaging terminase subunit 1 | 75418-75433 4:01:01  | GGGCGGGCGGCAGTGG     |
| 75448                                          | 75476 | 75077 | 80655 | CDS product DNA packaging terminase subunit 1 | 75448-75476 6:03:01  |                      |
| GGCGGGCATGGGCACGGCACCGGACGCGG                  |       |       |       |                                               |                      |                      |
| 75561                                          | 75587 | 75077 | 80655 | CDS product DNA packaging terminase subunit 1 | 75561-75587 5:02:01  |                      |
| GGCCGTCGAGGCGGCGCCGGTGCACGG                    |       |       |       |                                               |                      |                      |
| 75672                                          | 75709 | 75077 | 80655 | CDS product DNA packaging terminase subunit 1 | 75672-75709 7:04:01  |                      |
| CCAGGCCAGCACCAGCCAGCTGCCGCGATGCCGCCCC          |       |       |       |                                               |                      |                      |

|                               |       |       |       |                                                 |                                     |
|-------------------------------|-------|-------|-------|-------------------------------------------------|-------------------------------------|
| 75715                         | 75740 | 75077 | 80655 | CDS product DNA packaging terminase subunit 1   | 75715-75740 5:02:01                 |
| GGCGATGCCGGAGCCGGAGGCGCGGG    |       |       |       |                                                 |                                     |
| 75778                         | 75808 | 75077 | 80655 | CDS product DNA packaging terminase subunit 1   | 75778-75808 6:03:01                 |
| CCGCTCGGGCCACGGGCCGCGGGCCGCC  |       |       |       |                                                 |                                     |
| 75849                         | 75877 | 75077 | 80655 | CDS product DNA packaging terminase subunit 1   | 75849-75877 5:02:01                 |
| GGGTGAACACGGCCGCGGGCTCGGCGCGG |       |       |       |                                                 |                                     |
| 75885                         | 75897 | 75077 | 80655 | CDS product DNA packaging terminase subunit 1   | 75885-75897 4:01:01 CCTCGCCGCCGCC   |
| 75922                         | 75941 | 75077 | 80655 | CDS product DNA packaging terminase subunit 1   | 75922-75941 5:02:01                 |
| GGGCAGGAAGGTCTCGGCGG          |       |       |       |                                                 |                                     |
| 76013                         | 76027 | 75077 | 80655 | CDS product DNA packaging terminase subunit 1   | 76013-76027 4:01:01 CCGCCGTGCGCCGCC |
| 76117                         | 76139 | 75077 | 80655 | CDS product DNA packaging terminase subunit 1   | 76117-76139 4:01:01                 |
| GGCCTTGCCGGTGTGGTCGAGG        |       |       |       |                                                 |                                     |
| 76191                         | 76207 | 75077 | 80655 | CDS product DNA packaging terminase subunit 1   | 76191-76207 4:01:01                 |
| GGACGGCCTCGGGGCGG             |       |       |       |                                                 |                                     |
| 76307                         | 76330 | 75077 | 80655 | CDS product DNA packaging terminase subunit 1   | 76307-76330 5:02:01                 |
| CCGACCTCGTCCCGACCCGACGCC      |       |       |       |                                                 |                                     |
| 76386                         | 76406 | 76332 | 78437 | CDS product DNA packaging tegument protein UL17 | 76386-76406 4:01:01                 |
| CCGCGGGCACCGTCGTCCACC         |       |       |       |                                                 |                                     |
| 76431                         | 76452 | 76332 | 78437 | CDS product DNA packaging tegument protein UL17 | 76431-76452 4:01:01                 |
| GGGCCGCCGGGGCGGACCCCGG        |       |       |       |                                                 |                                     |
| 76465                         | 76499 | 76332 | 78437 | CDS product DNA packaging tegument protein UL17 | 76465-76499 9:06:02                 |
| GGCCTCGGGGGGGCGCGGGGCGCGGGGGG |       |       |       |                                                 |                                     |
| 76637                         | 76662 | 76332 | 78437 | CDS product DNA packaging tegument protein UL17 | 76637-76662 5:02:01                 |

|                                                                         |                      |                |
|-------------------------------------------------------------------------|----------------------|----------------|
| CCCACGCAGCCGGCGGCCCGCCCCC                                               |                      |                |
| 76713 76732 76332 78437 CDS product DNA packaging tegument protein UL17 | 76713-76732 4:01:01  |                |
| CCCTGCCCCGTCGCCCTGCCC                                                   |                      |                |
| 76774 76800 76332 78437 CDS product DNA packaging tegument protein UL17 | 76774-76800 5:02:01  |                |
| GGCGCTGCGGCTGGAAATGGCCGACGG                                             |                      |                |
| 76863 76886 76332 78437 CDS product DNA packaging tegument protein UL17 | 76863-76886 5:02:01  |                |
| CCGACGTCCCGCGCCTGGCCGCC                                                 |                      |                |
| 76918 76954 76332 78437 CDS product DNA packaging tegument protein UL17 | 76918-76954 9:06:02  |                |
| CCATGCCGGCCTGCCGGCCGCCCGTCGCCGGGCC                                      |                      |                |
| 76994 77008 76332 78437 CDS product DNA packaging tegument protein UL17 | 76994-77008 4:01:01  | CCGCCGCTGCCGCC |
| 77020 77041 76332 78437 CDS product DNA packaging tegument protein UL17 | 77020-77041 4:01:01  |                |
| CCGCCCGAGCGCCTGCTGGCC                                                   |                      |                |
| 77059 77078 76332 78437 CDS product DNA packaging tegument protein UL17 | 77059-77078 4:01:01  |                |
| CCCCGCCGCGGTGCCCCGC                                                     |                      |                |
| 77223 77275 76332 78437 CDS product DNA packaging tegument protein UL17 | 77223-77275 13:10:03 |                |
| CCGCCCGCCTGCGCCGCCACCGCGCCGGTCCTGCCCTCCCGACGCCGCGACC                    |                      |                |
| 77293 77346 76332 78437 CDS product DNA packaging tegument protein UL17 | 77293-77346 9:06:02  |                |
| GGAGCCGCGGGCCCGGGCCCGGACTTGCGCGGTGCGCGGGCGCTGGCGGG                      |                      |                |
| 77297 77314 76332 78437 CDS product DNA packaging tegument protein UL17 | 77297-77314 4:01:01  |                |
| CCGCGGGCCGCCGGGCC                                                       |                      |                |
| 77536 77578 76332 78437 CDS product DNA packaging tegument protein UL17 | 77536-77578 8:05:02  |                |
| GGCGGGCTGGGGCGGGCGCCGGGCGCCCGGCCCGCCGG                                  |                      |                |
| 77554 77581 76332 78437 CDS product DNA packaging tegument protein UL17 | 77554-77581 6:03:01  |                |

|                                     |       |       |       |     |         |          |              |          |              |             |         |
|-------------------------------------|-------|-------|-------|-----|---------|----------|--------------|----------|--------------|-------------|---------|
| CCGGGCGCGCCGCGCCGCGCCGCGCCGCGCC     |       |       |       |     |         |          |              |          |              |             |         |
| 77692                               | 77715 | 76332 | 78437 | CDS | product | DNA      | packaging    | tegument | protein UL17 | 77692-77715 | 5:02:01 |
| GGCGGCGCGCTGGGCGAGGACGG             |       |       |       |     |         |          |              |          |              |             |         |
| 77823                               | 77849 | 76332 | 78437 | CDS | product | DNA      | packaging    | tegument | protein UL17 | 77823-77849 | 5:02:01 |
| CCCGCCCGGACCTACCCCAGCGTTCC          |       |       |       |     |         |          |              |          |              |             |         |
| 77876                               | 77899 | 76332 | 78437 | CDS | product | DNA      | packaging    | tegument | protein UL17 | 77876-77899 | 5:02:01 |
| GGATGTCTGGAGGACGTGGCGCGG            |       |       |       |     |         |          |              |          |              |             |         |
| 77938                               | 77957 | 76332 | 78437 | CDS | product | DNA      | packaging    | tegument | protein UL17 | 77938-77957 | 4:01:01 |
| GGGGGCGCTCTCGGCCCGGG                |       |       |       |     |         |          |              |          |              |             |         |
| 77983                               | 77993 | 76332 | 78437 | CDS | product | DNA      | packaging    | tegument | protein UL17 | 77983-77993 | 4:01:01 |
| 78013                               | 78036 | 76332 | 78437 | CDS | product | DNA      | packaging    | tegument | protein UL17 | 78013-78036 | 4:01:01 |
| CCCCGGCGGCCGGGGCGTCTGCC             |       |       |       |     |         |          |              |          |              |             |         |
| 78107                               | 78125 | 76332 | 78437 | CDS | product | DNA      | packaging    | tegument | protein UL17 | 78107-78125 | 4:01:01 |
| GGCGGGGAGGTCATAAAGG                 |       |       |       |     |         |          |              |          |              |             |         |
| 78145                               | 78180 | 76332 | 78437 | CDS | product | DNA      | packaging    | tegument | protein UL17 | 78145-78180 | 7:04:01 |
| GGCCACGACGGCGCAGGAGTCCGGGCGGCGCCGGG |       |       |       |     |         |          |              |          |              |             |         |
| 78324                               | 78350 | 76332 | 78437 | CDS | product | DNA      | packaging    | tegument | protein UL17 | 78324-78350 | 4:01:01 |
| CCCTGGAGGCCGACGTCGCCGCGCACC         |       |       |       |     |         |          |              |          |              |             |         |
| 78376                               | 78396 | 76332 | 78437 | CDS | product | DNA      | packaging    | tegument | protein UL17 | 78376-78396 | 5:02:01 |
| GGCGGTGCTCGGGCGGCTGGG               |       |       |       |     |         |          |              |          |              |             |         |
| 78397                               | 78432 | 76332 | 78437 | CDS | product | DNA      | packaging    | tegument | protein UL17 | 78397-78432 | 8:05:02 |
| CCGCCCCCTCCCCGCGCCCCAGGCGCGCCGCCCC  |       |       |       |     |         |          |              |          |              |             |         |
| 78826                               | 78859 | 78471 | 79490 | CDS | product | tegument | protein UL16 |          |              | 78826-78859 | 7:04:01 |

|                                                 |       |       |       |                                               |                                          |
|-------------------------------------------------|-------|-------|-------|-----------------------------------------------|------------------------------------------|
| CCCCGCGCCGGCCGACCTCCCCGACCCGAGCGCC              |       |       |       |                                               |                                          |
| 78955                                           | 78973 | 78471 | 79490 | CDS product tegument protein UL16             | 78955-78973 4:01:01 GGCGCCGGGCGTGTGGTGG  |
| 79061                                           | 79078 | 78471 | 79490 | CDS product tegument protein UL16             | 79061-79078 4:01:01 GGGGGCGTGCTCGGGCGG   |
| 79174                                           | 79193 | 78471 | 79490 | CDS product tegument protein UL16             | 79174-79193 4:01:01 CCCGTGCGCCGCGCCGTGCC |
| 79343                                           | 79390 | 78471 | 79490 | CDS product tegument protein UL16             | 79343-79390 8:05:02                      |
| GGCGTCGGGCGCGCGGCGAAGCGGTGCCGGTGAACGGCGCCGGCTGG |       |       |       |                                               |                                          |
| 79729                                           | 79764 | 75077 | 80655 | CDS product DNA packaging terminase subunit 1 | 79729-79764 7:04:01                      |
| CCGCCGAACCACTGCCGGAGCCGCGCCACGATCTCC            |       |       |       |                                               |                                          |
| 79773                                           | 79791 | 75077 | 80655 | CDS product DNA packaging terminase subunit 1 | 79773-79791 4:01:01                      |
| GGGCTCGGTGGCTTTGCGG                             |       |       |       |                                               |                                          |
| 79873                                           | 79912 | 75077 | 80655 | CDS product DNA packaging terminase subunit 1 | 79873-79912 7:04:01                      |
| CCGTGCCGCCGTGGTACCAGGAACACCGTGGCCCGCTGCC        |       |       |       |                                               |                                          |
| 80106                                           | 80122 | 75077 | 80655 | CDS product DNA packaging terminase subunit 1 | 80106-80122 5:02:01                      |
| GGCGCGGGGGGGGTCGG                               |       |       |       |                                               |                                          |
| 80158                                           | 80176 | 75077 | 80655 | CDS product DNA packaging terminase subunit 1 | 80158-80176 4:01:01                      |
| CCCACCAGCCGGCTGAACC                             |       |       |       |                                               |                                          |
| 80399                                           | 80416 | 75077 | 80655 | CDS product DNA packaging terminase subunit 1 | 80399-80416 4:01:01                      |
| GGCGAGAGCCGTGGCGG                               |       |       |       |                                               |                                          |
| 80477                                           | 80500 | 75077 | 80655 | CDS product DNA packaging terminase subunit 1 | 80477-80500 5:02:01                      |
| GGTGGCGCTTGGGGCCGCAACGG                         |       |       |       |                                               |                                          |
| 80531                                           | 80577 | 75077 | 80655 | CDS product DNA packaging terminase subunit 1 | 80531-80577 9:06:02                      |
| CCTCCCCGCGGGCGCCGCCGCCGCTCGGGCCGCGCTCCCCGTTCC   |       |       |       |                                               |                                          |
| 80719                                           | 80755 | 80718 | 81386 | CDS product tegument protein UL14             | 80719-80755 6:03:01                      |

|                                               |       |       |       |                                                      |                                             |
|-----------------------------------------------|-------|-------|-------|------------------------------------------------------|---------------------------------------------|
| GGCGACGGCGGCTCGCGGGAGACCCGGCGCCGGGG           |       |       |       |                                                      |                                             |
| 80775                                         | 80792 | 80718 | 81386 | CDS product tegument protein UL14                    | 80775-80792 5:02:01 GGCGGCGGCTGCGGCTGG      |
| 80852                                         | 80873 | 80718 | 81386 | CDS product tegument protein UL14                    | 80852-80873 4:01:01 GGCGGACCGGGACGACCCGG    |
| 80920                                         | 80942 | 80718 | 81386 | CDS product tegument protein UL14                    | 80920-80942 5:02:01 GGGGGGCGAGATCCGGGCGGCGG |
| 80994                                         | 81025 | 80718 | 81386 | CDS product tegument protein UL14                    | 80994-81025 6:03:01                         |
| CCGCCCAAGCGGCCGTGGCCGCCGTGCTGGCC              |       |       |       |                                                      |                                             |
| 81091                                         | 81111 | 80718 | 81386 | CDS product tegument protein UL14                    | 81091-81111 4:01:01 GGACCAGGAGGAGCGCATGGG   |
| 81124                                         | 81170 | 80718 | 81386 | CDS product tegument protein UL14                    | 81124-81170 9:06:02                         |
| GGACTGCGGGGCGACGTGGGCGTGGGCGGGCCTGGCTGGACGGGG |       |       |       |                                                      |                                             |
| 81263                                         | 81278 | 80718 | 81386 | CDS product tegument protein UL14                    | 81263-81278 4:01:01 GGAGGGCTCGGCGCGG        |
| 81305                                         | 81337 | 80718 | 81386 | CDS product tegument protein UL14                    | 81305-81337 8:05:02                         |
| GGCTCGGCGGCAGCGCGGCGGGCCAGGCTGGG              |       |       |       |                                                      |                                             |
| 81365                                         | 81395 | 81301 | 82779 | CDS product tegument serine/threonine protein kinase | 81365-81395 7:04:01                         |
| CCGCCCCACAGACCCCCTGACCCCCGCGCC                |       |       |       |                                                      |                                             |
| 81408                                         | 81425 | 81301 | 82779 | CDS product tegument serine/threonine protein kinase | 81408-81425 4:01:01                         |
| CCCCCGCTCCGGCGCGCC                            |       |       |       |                                                      |                                             |
| 81463                                         | 81492 | 81301 | 82779 | CDS product tegument serine/threonine protein kinase | 81463-81492 7:04:01                         |
| CCGCCCTCGCGCCTCGGGCCCGGATCC                   |       |       |       |                                                      |                                             |
| 81501                                         | 81529 | 81301 | 82779 | CDS product tegument serine/threonine protein kinase | 81501-81529 6:03:01                         |
| CCGCGCGCGATCCGCCCCGCGAGCCGCC                  |       |       |       |                                                      |                                             |
| 81660                                         | 81677 | 81301 | 82779 | CDS product tegument serine/threonine protein kinase | 81660-81677 4:01:01                         |
| GGGGCCGGCGGCTACGGG                            |       |       |       |                                                      |                                             |
| 81697                                         | 81719 | 81301 | 82779 | CDS product tegument serine/threonine protein kinase | 81697-81719 4:01:01                         |

|                                 |       |       |       |                                                      |                                                 |
|---------------------------------|-------|-------|-------|------------------------------------------------------|-------------------------------------------------|
| CCGCCGGCGTGGCCGTAAAGACC         |       |       |       |                                                      |                                                 |
| 81808                           | 81826 | 81301 | 82779 | CDS product tegument serine/threonine protein kinase | 81808-81826 4:01:01                             |
| CCGACGCCATCATCCGGCC             |       |       |       |                                                      |                                                 |
| 81878                           | 81908 | 81301 | 82779 | CDS product tegument serine/threonine protein kinase | 81878-81908 7:04:01                             |
| GGACCTGGTGGCCTACGCGGAGGCGGCGGGG |       |       |       |                                                      |                                                 |
| 81913                           | 81929 | 81301 | 82779 | CDS product tegument serine/threonine protein kinase | 81913-81929 4:01:01                             |
| CCGTCCTGTCGCCCCGCC              |       |       |       |                                                      |                                                 |
| 82205                           | 82234 | 81301 | 82779 | CDS product tegument serine/threonine protein kinase | 82205-82234 6:03:01                             |
| CCTGCCGCCCACGCCCGGATGCCAGACCC   |       |       |       |                                                      |                                                 |
| 82280                           | 82305 | 81301 | 82779 | CDS product tegument serine/threonine protein kinase | 82280-82305 4:01:01                             |
| CCTCGACTTCCTTAACCGGCACGGCC      |       |       |       |                                                      |                                                 |
| 82316                           | 82338 | 81301 | 82779 | CDS product tegument serine/threonine protein kinase | 82316-82338 4:01:01                             |
| CCCCGAGCCGCTGCCCCGCGGACC        |       |       |       |                                                      |                                                 |
| 82476                           | 82505 | 81301 | 82779 | CDS product tegument serine/threonine protein kinase | 82476-82505 5:02:01                             |
| GGGCTGGTCATCGGCATTCTGGCGCACCGG  |       |       |       |                                                      |                                                 |
| 82580                           | 82608 | 81301 | 82779 | CDS product tegument serine/threonine protein kinase | 82580-82608 5:02:01                             |
| GGCCGTGCGGGCGGCCATCGGCAACGTGG   |       |       |       |                                                      |                                                 |
| 82613                           | 82637 | 81301 | 82779 | CDS product tegument serine/threonine protein kinase | 82613-82637 4:01:01                             |
| CCGCGCGCCTTCGACCGCACTACC        |       |       |       |                                                      |                                                 |
| 82887                           | 82913 | 82776 | 84239 | CDS product deoxyribonuclease                        | 82887-82913 6:03:01 GGCCGAGGCGGCGGGCGAAGGCGACGG |
| 82990                           | 83008 | 82776 | 84239 | CDS product deoxyribonuclease                        | 82990-83008 4:01:01 GGCGCGGCGCGCCCCGGGG         |
| 83028                           | 83050 | 82776 | 84239 | CDS product deoxyribonuclease                        | 83028-83050 5:02:01 CCGCGACCCGCGGCCAGGCCGCC     |
| 83061                           | 83125 | 82776 | 84239 | CDS product deoxyribonuclease                        | 83061-83125 10:07:02                            |



GGTGGCTGCTCCGGCGGAGCCTGGCCACGGCCTCGTCGGTCCGCTGGGGCGCCGCCGGCCCGCGG

|       |       |       |       |                               |
|-------|-------|-------|-------|-------------------------------|
| 83071 | 83092 | 82776 | 84239 | CDS product deoxyribonuclease |
| 83112 | 83127 | 82776 | 84239 | CDS product deoxyribonuclease |
| 83236 | 83260 | 82776 | 84239 | CDS product deoxyribonuclease |
| 83264 | 83284 | 82776 | 84239 | CDS product deoxyribonuclease |
| 83326 | 83339 | 82776 | 84239 | CDS product deoxyribonuclease |
| 83350 | 83369 | 82776 | 84239 | CDS product deoxyribonuclease |
| 83376 | 83397 | 82776 | 84239 | CDS product deoxyribonuclease |
| 83468 | 83485 | 82776 | 84239 | CDS product deoxyribonuclease |
| 83604 | 83629 | 82776 | 84239 | CDS product deoxyribonuclease |
| 83654 | 83681 | 82776 | 84239 | CDS product deoxyribonuclease |
| 83691 | 83730 | 82776 | 84239 | CDS product deoxyribonuclease |

CCGACGCCTGGGCGCCGCCCGCCTGCCGGCGCCGCACC

|       |       |       |       |                                           |
|-------|-------|-------|-------|-------------------------------------------|
| 83938 | 83965 | 82776 | 84239 | CDS product deoxyribonuclease             |
| 84040 | 84053 | 82776 | 84239 | CDS product deoxyribonuclease             |
| 84171 | 84202 | 82776 | 84239 | CDS product deoxyribonuclease             |
| 84213 | 84229 | 84191 | 84460 | CDS product myristylated tegument protein |
| 84291 | 84327 | 84191 | 84460 | CDS product myristylated tegument protein |

CCTCGACGACCTGCAGGCCCTGACGGCCGGGGCCGCC

|       |       |       |       |                                           |
|-------|-------|-------|-------|-------------------------------------------|
| 84306 | 84349 | 84191 | 84460 | CDS product myristylated tegument protein |
|-------|-------|-------|-------|-------------------------------------------|

GGCCCTGACGGCCGGGGCCGCCGCGGGGAGGAGGGCGGCGAGG

|       |       |       |       |                                           |
|-------|-------|-------|-------|-------------------------------------------|
| 84414 | 84445 | 84191 | 84460 | CDS product myristylated tegument protein |
|-------|-------|-------|-------|-------------------------------------------|

CCCCCCGTAAAACCGTACCGGCCGAGCGCC

83071-83092 4:01:01 CCGGCGGAGCCTGGCCACGGCC

83112-83127 4:01:01 CCGCCGCCCCGCGGCC

83236-83260 5:02:01 CCCGCCGCGGACCTCCCAACGCC

83264-83284 6:03:01 GGGCTGGCGGACGGCGGGGG

83326-83339 4:01:01 GGCCGGGGCGGCGG

83350-83369 5:02:01 GGCGGGGGCGGGCGAGAGG

83376-83397 4:01:01 CCTGCGCCTCCTGATCGACCC

83468-83485 4:01:01 CCGCATCCACCCAGACC

83604-83629 5:02:01 CCTTCCTGCGGTCCGTGCGCCGCC

83654-83681 4:01:01 GGCTGCCCCGCGCCGCGGAAGCGCTGG

83691-83730 9:06:02

83938-83965 4:01:01 CCTCGGGGCCACTTCCCCGAGCGGCC

84040-84053 4:01:01 GGGCCGGGGCGG

84171-84202 6:03:01 GGGCGCCGTCAAGGAGTCATGGGACAGGCGG

84213-84229 4:01:01 CCGATGCCGCCGCAACC

84291-84327 6:03:01

84306-84349 9:06:02

84414-84445 6:03:01

|                                         |       |       |       |                                                     |                                                |
|-----------------------------------------|-------|-------|-------|-----------------------------------------------------|------------------------------------------------|
| 84544                                   | 84574 | 84530 | 85846 | CDS product envelope glycoprotein M                 | 84544-84574 9:06:02                            |
| GGGGGGTGGGAGCGGGGGGGGGCGGGG             |       |       |       |                                                     |                                                |
| 84585                                   | 84603 | 84530 | 85846 | CDS product envelope glycoprotein M                 | 84585-84603 4:01:01 GGGAGTGGGGGACCTCCGG        |
| 84614                                   | 84638 | 84530 | 85846 | CDS product envelope glycoprotein M                 | 84614-84638 6:03:01 GGTATGGTTGGCGGGCGGGCGGGG   |
| 84813                                   | 84827 | 84530 | 85846 | CDS product envelope glycoprotein M                 | 84813-84827 4:01:01 GGTGGTGCAGGCAGG            |
| 84853                                   | 84878 | 84530 | 85846 | CDS product envelope glycoprotein M                 | 84853-84878 4:01:01 GGCCACGGCCAGCAGGGCGACGCCGG |
| 84875                                   | 84896 | 84530 | 85846 | CDS product envelope glycoprotein M                 | 84875-84896 4:01:01 CCGGCCAGCGCCAGCTTTACCC     |
| 84984                                   | 85008 | 84530 | 85846 | CDS product envelope glycoprotein M                 | 84984-85008 5:02:01 CCACCAGCGTTCCAAAGCCGCGCC   |
| 85120                                   | 85135 | 84530 | 85846 | CDS product envelope glycoprotein M                 | 85120-85135 4:01:01 CCCCAGCCCCGCCCCC           |
| 85179                                   | 85195 | 84530 | 85846 | CDS product envelope glycoprotein M                 | 85179-85195 4:01:01 CCAGCAGGCCGCCGGCC          |
| 85210                                   | 85246 | 84530 | 85846 | CDS product envelope glycoprotein M                 | 85210-85246 6:03:01                            |
| GGCGCGCCCGGGGCCAGCAGGCGGTGGCGCGCGG      |       |       |       |                                                     |                                                |
| 85285                                   | 85304 | 84530 | 85846 | CDS product envelope glycoprotein M                 | 85285-85304 4:01:01 GGCGCCGGGCAGCCCGCGG        |
| 85324                                   | 85364 | 84530 | 85846 | CDS product envelope glycoprotein M                 | 85324-85364 9:06:02                            |
| GGCGGCCGGCGGCCAGGTGCGCGAGGTAGGTGGCCGCGG |       |       |       |                                                     |                                                |
| 85414                                   | 85432 | 84530 | 85846 | CDS product envelope glycoprotein M                 | 85414-85432 4:01:01 CCAGGCCGCCAGCGCGCCC        |
| 85488                                   | 85503 | 84530 | 85846 | CDS product envelope glycoprotein M                 | 85488-85503 4:01:01 CCGCCGAAAACCCCC            |
| 85582                                   | 85602 | 84530 | 85846 | CDS product envelope glycoprotein M                 | 85582-85602 4:01:01 GGAGAAGGCCGCTGTGGTCGG      |
| 85634                                   | 85669 | 84530 | 85846 | CDS product envelope glycoprotein M                 | 85634-85669 6:03:01                            |
| CCGAGCTCCCCTGCGCCAGGCGCGCCGTCGGCC       |       |       |       |                                                     |                                                |
| 85819                                   | 85835 | 84530 | 85846 | CDS product envelope glycoprotein M                 | 85819-85835 4:01:01 GGCGGCAGGCTGCGCGG          |
| 85849                                   | 85877 | 85845 | 88424 | CDS product DNA replication origin-binding helicase | 85849-85877 5:02:01                            |
| GGCAACGCCGGGGCAGCGCCGATGCGG             |       |       |       |                                                     |                                                |

|                                               |       |       |       |                                                     |                     |
|-----------------------------------------------|-------|-------|-------|-----------------------------------------------------|---------------------|
| 85990                                         | 86005 | 85845 | 88424 | CDS product DNA replication origin-binding helicase | 85990-86005 4:01:01 |
| CCGGCGCCACCCCGCC                              |       |       |       |                                                     |                     |
| 86130                                         | 86156 | 85845 | 88424 | CDS product DNA replication origin-binding helicase | 86130-86156 6:03:01 |
| GGTTGGGCGAGGCGCTGGGGGCCACGG                   |       |       |       |                                                     |                     |
| 86278                                         | 86312 | 85845 | 88424 | CDS product DNA replication origin-binding helicase | 86278-86312 6:03:01 |
| GGGCGCGCCTACCGCGGCTGCTGGTGCAAGTGG             |       |       |       |                                                     |                     |
| 86448                                         | 86492 | 85845 | 88424 | CDS product DNA replication origin-binding helicase | 86448-86492 7:04:01 |
| GGCTGTTGCGGCGGTGCCC GCGATTGTGGCGATGGACGCGACGG |       |       |       |                                                     |                     |
| 86629                                         | 86661 | 85845 | 88424 | CDS product DNA replication origin-binding helicase | 86629-86661 7:04:01 |
| GGCGGCGCGCTTAAGGGGACGCCGAGGACGG               |       |       |       |                                                     |                     |
| 87088                                         | 87109 | 85845 | 88424 | CDS product DNA replication origin-binding helicase | 87088-87109 6:03:01 |
| GGTGGCTGAGGACGGCGGCTGG                        |       |       |       |                                                     |                     |
| 87376                                         | 87397 | 85845 | 88424 | CDS product DNA replication origin-binding helicase | 87376-87397 4:01:01 |
| CCGACGGCCCGCGGCCGCGGCC                        |       |       |       |                                                     |                     |
| 87414                                         | 87432 | 85845 | 88424 | CDS product DNA replication origin-binding helicase | 87414-87432 4:01:01 |
| CCGCCGGCATCCCGTCCCC                           |       |       |       |                                                     |                     |
| 87433                                         | 87452 | 85845 | 88424 | CDS product DNA replication origin-binding helicase | 87433-87452 4:01:01 |
| GGTGTCGGCCGAGGGCCTGG                          |       |       |       |                                                     |                     |
| 87441                                         | 87475 | 85845 | 88424 | CDS product DNA replication origin-binding helicase | 87441-87475 7:04:01 |
| CCGAGGGCCTGGCCGAGCACCCGCGCGTGGCCGCC           |       |       |       |                                                     |                     |
| 87608                                         | 87626 | 85845 | 88424 | CDS product DNA replication origin-binding helicase | 87608-87626 5:02:01 |
| CCCGCCGCCCGCAAAGCC                            |       |       |       |                                                     |                     |
| 87674                                         | 87697 | 85845 | 88424 | CDS product DNA replication origin-binding helicase | 87674-87697 4:01:01 |

|                                                           |       |       |       |                                                     |                                              |
|-----------------------------------------------------------|-------|-------|-------|-----------------------------------------------------|----------------------------------------------|
| CCCGTGCTACCGAGGCCGGCGCC                                   |       |       |       |                                                     |                                              |
| 87706                                                     | 87733 | 85845 | 88424 | CDS product DNA replication origin-binding helicase | 87706-87733 5:02:01                          |
| GGCGGCTTTGGCGCCCGGGCTGCGCTGG                              |       |       |       |                                                     |                                              |
| 87766                                                     | 87804 | 85845 | 88424 | CDS product DNA replication origin-binding helicase | 87766-87804 7:04:01                          |
| GGCCCCGGCGCTGGGGCTGCTGCGGCGCCGCGGCGCGG                    |       |       |       |                                                     |                                              |
| 87934                                                     | 87993 | 85845 | 88424 | CDS product DNA replication origin-binding helicase | 87934-87993 9:06:02                          |
| GGCGGGCGTGATGGCCCGGGGCTGTGGTCGCTGTGGCCGCGGGCTTTCTGGGCGGGG |       |       |       |                                                     |                                              |
| 88003                                                     | 88028 | 85845 | 88424 | CDS product DNA replication origin-binding helicase | 88003-88028 5:02:01                          |
| GGGGCGGGGCGTGGGGCTGGGCGCGG                                |       |       |       |                                                     |                                              |
| 88062                                                     | 88084 | 85845 | 88424 | CDS product DNA replication origin-binding helicase | 88062-88084 4:01:01                          |
| GGGAAGAGGTGTTCTGGGGCCCCG                                  |       |       |       |                                                     |                                              |
| 88309                                                     | 88342 | 85845 | 88424 | CDS product DNA replication origin-binding helicase | 88309-88342 6:03:01                          |
| CCCGGAGCCCGGGCCCGACGCGCCCCCGAAGCC                         |       |       |       |                                                     |                                              |
| 88681                                                     | 88697 | 88485 | 90731 | CDS product helicase-primase subunit                | 88681-88697 4:01:01 GGCCGCGCGGCTGGAGG        |
| 88710                                                     | 88724 | 88485 | 90731 | CDS product helicase-primase subunit                | 88710-88724 5:02:01 CCGCCGCGCCCCC            |
| 88875                                                     | 88911 | 88485 | 90731 | CDS product helicase-primase subunit                | 88875-88911 7:04:01                          |
| CCGCCGAGGAGCCCCCGATGCCGCCGACGCGGCCCC                      |       |       |       |                                                     |                                              |
| 88933                                                     | 88985 | 88485 | 90731 | CDS product helicase-primase subunit                | 88933-88985 10:07:02                         |
| GGCGCTACGGCTGGCCGTAGAGGAAGACGCGGTGCGCGCGGCGGCGGCGG        |       |       |       |                                                     |                                              |
| 89046                                                     | 89062 | 88485 | 90731 | CDS product helicase-primase subunit                | 89046-89062 4:01:01 CCGACCTCTCCGCGCCC        |
| 89121                                                     | 89139 | 88485 | 90731 | CDS product helicase-primase subunit                | 89121-89139 4:01:01 CCGACATCGCCCAGCCCC       |
| 89142                                                     | 89165 | 88485 | 90731 | CDS product helicase-primase subunit                | 89142-89165 5:02:01 GGAAGCGGGCCGGGCGCCTGGCGG |
| 89277                                                     | 89296 | 88485 | 90731 | CDS product helicase-primase subunit                | 89277-89296 4:01:01 CCTTTTCGCCGATGGCCGCC     |

|                                                       |       |       |       |                                      |                                                |
|-------------------------------------------------------|-------|-------|-------|--------------------------------------|------------------------------------------------|
| 89339                                                 | 89368 | 88485 | 90731 | CDS product helicase-primase subunit | 89339-89368 5:02:01                            |
| GGACCGGCGCAGGTCCTCGGCTTTCTGGGG                        |       |       |       |                                      |                                                |
| 89448                                                 | 89464 | 88485 | 90731 | CDS product helicase-primase subunit | 89448-89464 4:01:01 CCGCCGACGCCGGCGCC          |
| 89623                                                 | 89655 | 88485 | 90731 | CDS product helicase-primase subunit | 89623-89655 5:02:01                            |
| GGGCGGCAGCGACGGGTCAGATTGCCCCGCGG                      |       |       |       |                                      |                                                |
| 89727                                                 | 89750 | 88485 | 90731 | CDS product helicase-primase subunit | 89727-89750 4:01:01 CCTTTTTTCCCACCTGTACCCC     |
| 89965                                                 | 90005 | 88485 | 90731 | CDS product helicase-primase subunit | 89965-90005 6:03:01                            |
| GGATGGCTTTTGGGGCGCCTTCGGGGACGCGGCGCCGAGG              |       |       |       |                                      |                                                |
| 90294                                                 | 90316 | 88485 | 90731 | CDS product helicase-primase subunit | 90294-90316 4:01:01 CCGTCGCCCAGCCCGAGCGCCCC    |
| 90333                                                 | 90346 | 88485 | 90731 | CDS product helicase-primase subunit | 90333-90346 4:01:01 CCGCCGCCGCGGCC             |
| 90469                                                 | 90490 | 88485 | 90731 | CDS product helicase-primase subunit | 90469-90490 4:01:01 GGACGCGGACCAGGCCCCCCGG     |
| 90478                                                 | 90492 | 88485 | 90731 | CDS product helicase-primase subunit | 90478-90492 4:01:01 CCACGGCCCCCGGCC            |
| 90505                                                 | 90521 | 88485 | 90731 | CDS product helicase-primase subunit | 90505-90521 4:01:01 GGCGGGCCACGAGGCGG          |
| 90942                                                 | 90965 | 90784 | 91683 | CDS product tegument protein UL7     | 90942-90965 6:03:01 CCCGCCGCGCCGCGCCGCGCCGCC   |
| 91269                                                 | 91321 | 90784 | 91683 | CDS product tegument protein UL7     | 91269-91321 9:06:02                            |
| GGGGCGGCACAAGGCCAGCCGGTACGGCAGCACGGCAGCGGGCACGGTAGTGG |       |       |       |                                      |                                                |
| 91341                                                 | 91360 | 90784 | 91683 | CDS product tegument protein UL7     | 91341-91360 4:01:01 GGCGGTGAGCACGGCGAAGG       |
| 91370                                                 | 91384 | 90784 | 91683 | CDS product tegument protein UL7     | 91370-91384 4:01:01 GGAAGGCCGGCATGG            |
| 91507                                                 | 91530 | 90784 | 91683 | CDS product tegument protein UL7     | 91507-91530 4:01:01 GGCGGCCCTGCTGGGATCTCGCGG   |
| 91716                                                 | 91741 | 91640 | 93706 | CDS product capsid portal protein    | 91716-91741 5:02:01 GGCTGCGGCTGCGGCTGCGGCTGCGG |
| 91764                                                 | 91789 | 91640 | 93706 | CDS product capsid portal protein    | 91764-91789 5:02:01 GGCTGCGGCTGCGGCTGCGGCTGCGG |
| 91926                                                 | 91948 | 91640 | 93706 | CDS product capsid portal protein    | 91926-91948 6:03:01 CCTCTCCGACCTGCACGCCTCC     |
| 92003                                                 | 92024 | 91640 | 93706 | CDS product capsid portal protein    | 92003-92024 4:01:01 GGCGCCAGGATCAAGGAGATGG     |

|                                      |       |       |       |                                   |             |         |                          |
|--------------------------------------|-------|-------|-------|-----------------------------------|-------------|---------|--------------------------|
| 92043                                | 92059 | 91640 | 93706 | CDS product capsid portal protein | 92043-92059 | 4:01:01 | CCGACACCTCCTGGCCC        |
| 92103                                | 92131 | 91640 | 93706 | CDS product capsid portal protein | 92103-92131 | 5:02:01 |                          |
| CCTGCTCCCACAGCCGCGAGCCGCTCC          |       |       |       |                                   |             |         |                          |
| 92227                                | 92255 | 91640 | 93706 | CDS product capsid portal protein | 92227-92255 | 6:03:01 |                          |
| CCCCAATTCCGCCGTCCGCGGGGCCCCGCC       |       |       |       |                                   |             |         |                          |
| 92265                                | 92293 | 91640 | 93706 | CDS product capsid portal protein | 92265-92293 | 7:04:01 |                          |
| CCCGGGCCGGCCGGCGGCCGCCCCCCCC         |       |       |       |                                   |             |         |                          |
| 92268                                | 92281 | 91640 | 93706 | CDS product capsid portal protein | 92268-92281 | 4:01:01 | GGGCCGGCCGGCGG           |
| 92300                                | 92319 | 91640 | 93706 | CDS product capsid portal protein | 92300-92319 | 4:01:01 | GGCGTCGGCCGCTTGGGCGG     |
| 92377                                | 92393 | 91640 | 93706 | CDS product capsid portal protein | 92377-92393 | 4:01:01 | GGCCAGGTCGCGGTTGG        |
| 92502                                | 92541 | 91640 | 93706 | CDS product capsid portal protein | 92502-92541 | 9:06:02 |                          |
| CCGCCCCCGCCCGCGCGGCCGCGCCGCGCCAAATCC |       |       |       |                                   |             |         |                          |
| 92694                                | 92712 | 91640 | 93706 | CDS product capsid portal protein | 92694-92712 | 4:01:01 | CCGCGTCCTCGCCCTCACC      |
| 92728                                | 92745 | 91640 | 93706 | CDS product capsid portal protein | 92728-92745 | 4:01:01 | GGACGGCGCGCCCGGCGG       |
| 92770                                | 92785 | 91640 | 93706 | CDS product capsid portal protein | 92770-92785 | 4:01:01 | CCGCCCCACCAGCACC         |
| 92847                                | 92867 | 91640 | 93706 | CDS product capsid portal protein | 92847-92867 | 4:01:01 | CCAGGACCTCGCCGTGCAGCC    |
| 93063                                | 93086 | 91640 | 93706 | CDS product capsid portal protein | 93063-93086 | 5:02:01 | CCTCGCATTCGCCAGCACCCGCC  |
| 93124                                | 93156 | 91640 | 93706 | CDS product capsid portal protein | 93124-93156 | 6:03:01 |                          |
| GGGAAGCGGCCCCCGCGCCTGGACGGTGCCGG     |       |       |       |                                   |             |         |                          |
| 93153                                | 93176 | 91640 | 93706 | CDS product capsid portal protein | 93153-93176 | 4:01:01 | CCGGCACCGCGAGGCCGATGCGCC |
| 93219                                | 93242 | 91640 | 93706 | CDS product capsid portal protein | 93219-93242 | 4:01:01 | GGGCGAAGCTGGCCGGGTGCCGG  |
| 93231                                | 93250 | 91640 | 93706 | CDS product capsid portal protein | 93231-93250 | 4:01:01 | CCGGGCTGCCGGCGCCCCC      |
| 93333                                | 93369 | 91640 | 93706 | CDS product capsid portal protein | 93333-93369 | 7:04:01 |                          |

|                                             |       |       |       |                                               |                                           |
|---------------------------------------------|-------|-------|-------|-----------------------------------------------|-------------------------------------------|
| CCGCGAGCCGCACCACCTCTGCCTCGCCGCGCGGGCC       |       |       |       |                                               |                                           |
| 93424                                       | 93442 | 91640 | 93706 | CDS product capsid portal protein             | 93424-93442 4:01:01 CCAATCCCGCGCCACGTCC   |
| 93607                                       | 93640 | 91640 | 93706 | CDS product capsid portal protein             | 93607-93640 5:02:01                       |
| CCGCACCCACTCGCCCGGCGGCCCCGGAGCGCCC          |       |       |       |                                               |                                           |
| 93623                                       | 93643 | 91640 | 93706 | CDS product capsid portal protein             | 93623-93643 4:01:01 GGCGGCCCCGGAGCGCCCCGG |
| 93831                                       | 93874 | 93756 | 96272 | CDS product helicase-primase helicase subunit | 93831-93874 9:06:02                       |
| GGATCCGGCAGCTGGAGGCCGCGGGCTGCCGGCGGCGGCCCGG |       |       |       |                                               |                                           |
| 93892                                       | 93918 | 93756 | 96272 | CDS product helicase-primase helicase subunit | 93892-93918 4:01:01                       |
| CCGCGCGGCCGCGGGCGCGGAGTCCCC                 |       |       |       |                                               |                                           |
| 94080                                       | 94097 | 93756 | 96272 | CDS product helicase-primase helicase subunit | 94080-94097 5:02:01                       |
| CCGCCGCTACCACAGCC                           |       |       |       |                                               |                                           |
| 94185                                       | 94202 | 93756 | 96272 | CDS product helicase-primase helicase subunit | 94185-94202 4:01:01                       |
| CCAGCCCGCCCAGCATCC                          |       |       |       |                                               |                                           |
| 94260                                       | 94277 | 93756 | 96272 | CDS product helicase-primase helicase subunit | 94260-94277 4:01:01                       |
| GGCGGCTGCTGGGCGCGG                          |       |       |       |                                               |                                           |
| 94312                                       | 94330 | 93756 | 96272 | CDS product helicase-primase helicase subunit | 94312-94330 4:01:01                       |
| GGCGGAGCTCGCGGCGGGG                         |       |       |       |                                               |                                           |
| 94420                                       | 94438 | 93756 | 96272 | CDS product helicase-primase helicase subunit | 94420-94438 4:01:01                       |
| GGCCGGGCTGCTGGGCCGG                         |       |       |       |                                               |                                           |
| 94621                                       | 94645 | 93756 | 96272 | CDS product helicase-primase helicase subunit | 94621-94645 5:02:01                       |
| CCTCACCTGCCTTATACCAACCCC                    |       |       |       |                                               |                                           |
| 94888                                       | 94904 | 93756 | 96272 | CDS product helicase-primase helicase subunit | 94888-94904 4:01:01                       |
| CCGCCTCCACGCGCACC                           |       |       |       |                                               |                                           |

|       |       |       |       |                                                                                                 |                     |
|-------|-------|-------|-------|-------------------------------------------------------------------------------------------------|---------------------|
| 94990 | 95010 | 93756 | 96272 | CDS product helicase-primase helicase subunit<br>CCGCACCGCCACGGGCCAGCC                          | 94990-95010 5:02:01 |
| 95002 | 95049 | 93756 | 96272 | CDS product helicase-primase helicase subunit<br>GGGCCAGCCGGGCTGGGGTGGAAAAATGGCTGCAGGCCAACTCGGG | 95002-95049 8:05:02 |
| 95074 | 95097 | 93756 | 96272 | CDS product helicase-primase helicase subunit<br>CCGCGACCAGGACGCCCAGTCACC                       | 95074-95097 4:01:01 |
| 95360 | 95378 | 93756 | 96272 | CDS product helicase-primase helicase subunit<br>CCCGGCCTGGACCCGGGCC                            | 95360-95378 4:01:01 |
| 95363 | 95384 | 93756 | 96272 | CDS product helicase-primase helicase subunit<br>GGCCTGGACCCGGGCCGCGTGG                         | 95363-95384 4:01:01 |
| 95440 | 95474 | 93756 | 96272 | CDS product helicase-primase helicase subunit<br>GGACGACGCGGTCGACTGGCGGGGCTGGCGGCGG             | 95440-95474 8:05:02 |
| 95486 | 95507 | 93756 | 96272 | CDS product helicase-primase helicase subunit<br>GGCTCTGAGGCCGGCGCCGGGG                         | 95486-95507 4:01:01 |
| 95581 | 95600 | 93756 | 96272 | CDS product helicase-primase helicase subunit<br>CCAGCGCCCTACGTCCGCC                            | 95581-95600 4:01:01 |
| 95762 | 95780 | 93756 | 96272 | CDS product helicase-primase helicase subunit<br>GGCGGGCTGGTCTCCATGG                            | 95762-95780 4:01:01 |
| 95842 | 95863 | 93756 | 96272 | CDS product helicase-primase helicase subunit<br>GGAGGAGCCCGGCCGCGCCGG                          | 95842-95863 5:02:01 |
| 95849 | 95869 | 93756 | 96272 | CDS product helicase-primase helicase subunit<br>CCCGGCCGGCGCCGGCTCCCC                          | 95849-95869 4:01:01 |
| 95974 | 95993 | 93756 | 96272 | CDS product helicase-primase helicase subunit                                                   | 95974-95993 4:01:01 |



|                                                      |       |       |       |                                               |                                                      |
|------------------------------------------------------|-------|-------|-------|-----------------------------------------------|------------------------------------------------------|
| GGAGGCGCTGGACGACAAGG                                 |       |       |       |                                               |                                                      |
| 96042                                                | 96074 | 93756 | 96272 | CDS product helicase-primase helicase subunit | 96042-96074 6:03:01                                  |
| CCATGACCATCGCCCGCTCCCAGGGCCTGAGCC                    |       |       |       |                                               |                                                      |
| 96156                                                | 96183 | 93756 | 96272 | CDS product helicase-primase helicase subunit | 96156-96183 4:01:01                                  |
| CCCATTCTCCGAATGAACCTCAACCC                           |       |       |       |                                               |                                                      |
| 96294                                                | 96318 | 96293 | 96850 | CDS product nuclear protein UL4               | 96294-96318 4:01:01 GCGCTCGCGGCCCCGGGCCGGG           |
| 96362                                                | 96382 | 96293 | 96850 | CDS product nuclear protein UL4               | 96362-96382 4:01:01 CCCCTTGTGGGCCTGCCCC              |
| 96414                                                | 96448 | 96293 | 96850 | CDS product nuclear protein UL4               | 96414-96448 8:05:02                                  |
| GGGGATCGCTCGGTGTCGGTGGGCGGGGCTGG                     |       |       |       |                                               |                                                      |
| 96739                                                | 96759 | 96293 | 96850 | CDS product nuclear protein UL4               | 96739-96759 5:02:01 CCGGCGACGCGCCGCCCCC              |
| 96812                                                | 96834 | 96293 | 96850 | CDS product nuclear protein UL4               | 96812-96834 4:01:01 CCCGCCCTCGGGCTCCCGCCCC           |
| 96918                                                | 96973 | 96914 | 97294 | CDS product protein V57                       | 96918-96973 12:09:03                                 |
| GGAACGTGCGTAATTGGGGGGAAAGGGCGGTCGGGGCGGCGGTGGGCGGCGG |       |       |       |                                               |                                                      |
| 97026                                                | 97057 | 96914 | 97294 | CDS product protein V57                       | 97026-97057 6:03:01 GGCGCGGGCCCCGGGCCTCCGCGGGCGGCAGG |
| 97164                                                | 97183 | 96914 | 97294 | CDS product protein V57                       | 97164-97183 4:01:01 CCCCACCGCGGCGGCGCC               |
| 97201                                                | 97214 | 96914 | 97294 | CDS product protein V57                       | 97201-97214 4:01:01 GGCGCGCGGTTGG                    |
| 97236                                                | 97263 | 96914 | 97294 | CDS product protein V57                       | 97236-97263 7:04:01 CCGCCACCGTGGCCACCGGGCCTCCCC      |
| 97548                                                | 97573 | 97297 | 97911 | CDS product nuclear protein UL3               | 97548-97573 5:02:01 CCGCGCGCGCAGCCGCGCCAGGGCC        |
| 97756                                                | 97788 | 97297 | 97911 | CDS product nuclear protein UL3               | 97756-97788 7:04:01                                  |
| CCCAGACCCGCCGCTGCCAGGCCGGGCCCGGCC                    |       |       |       |                                               |                                                      |
| 97821                                                | 97852 | 97297 | 97911 | CDS product nuclear protein UL3               | 97821-97852 8:05:02 GGCGGGGCAGAAGCGGAAGCGCGGCGGCGG   |
| 97863                                                | 97878 | 97297 | 97911 | CDS product nuclear protein UL3               | 97863-97878 5:02:01 CCAGCCGCGGCCGCC                  |
| 98089                                                | 98114 | 97958 | 98863 | CDS product uracil DNA glycosylase            | 98089-98114 5:02:01 CCGCTTCCCGGCCGCCCAAAGGCC         |

|                                                                                        |        |        |        |                                      |               |                                   |
|----------------------------------------------------------------------------------------|--------|--------|--------|--------------------------------------|---------------|-----------------------------------|
| 98175                                                                                  | 98206  | 97958  | 98863  | CDS product uracil DNA glycosylase   | 98175-98206   | 7:04:01                           |
| CCAGTACCGCGTGCACCAGCCGCCCCAGCCC                                                        |        |        |        |                                      |               |                                   |
| 98355                                                                                  | 98373  | 97958  | 98863  | CDS product uracil DNA glycosylase   | 98355-98373   | 5:02:01 GGAGGCTGGGTGGGACCGG       |
| 98692                                                                                  | 98717  | 97958  | 98863  | CDS product uracil DNA glycosylase   | 98692-98717   | 5:02:01 GGGGCGCCGCGCTTGGGCGGCGCGG |
| 98758                                                                                  | 98855  | 97958  | 98863  | CDS product uracil DNA glycosylase   | 98758-98855   | 17:14:04                          |
| CCGAAGCCGGGGCCGAAGCCGGGGCCGAAGCCGGGGCCGAAGCCGGGGCCGAAGCCGGGGCCGAAGCCGGGGCCGGGGCCGGGGCC |        |        |        |                                      |               |                                   |
| 98838                                                                                  | 98859  | 97958  | 98863  | CDS product uracil DNA glycosylase   | 98838-98859   | 4:01:01 GGGGCCGGGGCCGGGGCCGGGG    |
| 98878                                                                                  | 98900  | 98866  | 99342  | CDS product envelope glycoprotein L  | 98878-98900   | 4:01:01 CCGTCGCCAGGGCCGAGGGACC    |
| 98909                                                                                  | 98925  | 98866  | 99342  | CDS product envelope glycoprotein L  | 98909-98925   | 4:01:01 GGTATCGGGGCGGCAGG         |
| 98938                                                                                  | 98954  | 98866  | 99342  | CDS product envelope glycoprotein L  | 98938-98954   | 5:02:01 GGCGGCGGTGGCAGCGG         |
| 99160                                                                                  | 99180  | 98866  | 99342  | CDS product envelope glycoprotein L  | 99160-99180   | 5:02:01 CCCGCCAGGCCGGGGCCGCC      |
| 101124                                                                                 | 101145 | 100670 | 102700 | CDS product ubiquitin E3 ligase ICPO | 101124-101145 | 5:02:01                           |
| CCGCCCGCGGCCGGGGTCCC                                                                   |        |        |        |                                      |               |                                   |
| 101156                                                                                 | 101191 | 100670 | 102700 | CDS product ubiquitin E3 ligase ICPO | 101156-101191 | 7:04:01                           |
| CCCGCCGAGCGCGCCCCGGGGCCGCGGGGGCC                                                       |        |        |        |                                      |               |                                   |
| 101164                                                                                 | 101211 | 100670 | 102700 | CDS product ubiquitin E3 ligase ICPO | 101164-101211 | 10:07:02                          |
| GGCCGGCCCCGGGGCCCGCGGGGGCCGGGTCGGCGGGGCGGGCGGG                                         |        |        |        |                                      |               |                                   |
| 101239                                                                                 | 101290 | 100670 | 102700 | CDS product ubiquitin E3 ligase ICPO | 101239-101290 | 10:07:02                          |
| GGAGATGGGCGCGGGGGCTGGGGCCGGGGCCGGGGTCGGGGCGCGG                                         |        |        |        |                                      |               |                                   |
| 101335                                                                                 | 101401 | 100670 | 102700 | CDS product ubiquitin E3 ligase ICPO | 101335-101401 | 12:09:03                          |
| CCCAGCTCCCCAGCAGCCTGGCCCGGCGTCCCCTCGTCCCTCCTCACTGCCCCCCCCAGCCC                         |        |        |        |                                      |               |                                   |
| 101411                                                                                 | 101443 | 100670 | 102700 | CDS product ubiquitin E3 ligase ICPO | 101411-101443 | 6:03:01                           |
| CCCGCCGCGACTCCCAAGCCCGCTCCCTCCCC                                                       |        |        |        |                                      |               |                                   |

|                                                                                                                                                                                                                                        |                                         |
|----------------------------------------------------------------------------------------------------------------------------------------------------------------------------------------------------------------------------------------|-----------------------------------------|
| 101498 101518 100670 102700 CDS product ubiquitin E3 ligase ICPO<br>GGCGCCGCCGGAATCGGGG                                                                                                                                                | 101498-101518 4:01:01                   |
| 101658 101705 100670 102700 CDS product ubiquitin E3 ligase ICPO<br>CCGCAGGCCGCCGAGCCGGCCGCCAGACGCCCCCGGTGCGCC                                                                                                                         | 101658-101705 9:06:02                   |
| 101715 101743 100670 102700 CDS product ubiquitin E3 ligase ICPO<br>CCTCCGCGTCCGTCTCCGGCTCCGTTTC                                                                                                                                       | 101715-101743 6:03:01                   |
| 101755 101771 100670 102700 CDS product ubiquitin E3 ligase ICPO                                                                                                                                                                       | 101755-101771 5:02:01 GGCGGTCAGGTCGGAGG |
| 101817 101842 100670 102700 CDS product ubiquitin E3 ligase ICPO<br>CCTCCGAGCCCTCCGAGTCCGAGTCC                                                                                                                                         | 101817-101842 6:03:01                   |
| 101859 101874 100670 102700 CDS product ubiquitin E3 ligase ICPO                                                                                                                                                                       | 101859-101874 4:01:01 CCACCCACGGCCGCC   |
| 102095 102131 100670 102700 CDS product ubiquitin E3 ligase ICPO<br>CCCACCAGAGCGCCCTCGACCCACTCCACCACCCGCC                                                                                                                              | 102095-102131 8:05:02                   |
| 102144 102160 100670 102700 CDS product ubiquitin E3 ligase ICPO                                                                                                                                                                       | 102144-102160 4:01:01 CCCCCGGCCCATGCTCC |
| 102161 102190 100670 102700 CDS product ubiquitin E3 ligase ICPO<br>GGCGTGTTCGGCAGCAAGGCAGGCGCGG                                                                                                                                       | 102161-102190 5:02:01                   |
| 102216 102391 100670 102700 CDS product ubiquitin E3 ligase ICPO<br>CCTGCGCCGCTCCGCGCCTCGCCCCGCGCCCCCGGCGCTCCGGCCGCTGCCCCCGGCGCCTCTGGCCTCCCCGGCTCCTCGCCCCCGGCCCCGCGCGCCTCGCTCCCGTCC<br>GCGGCCCCGGCTTCCCCCGCGCCCCCGAGGCCTCGCGTTCGGCCGCC | 102216-102391 36:33:09                  |
| 102438 102481 100670 102700 CDS product ubiquitin E3 ligase ICPO<br>CCGCGTCCGGCTCCAACGCGCCGTCCGCCCCGGCCCTCCCCC                                                                                                                         | 102438-102481 10:07:02                  |
| 102568 102581 100670 102700 CDS product ubiquitin E3 ligase ICPO                                                                                                                                                                       | 102568-102581 4:01:01 CCCCTCCAGCCACC    |
| 102582 102618 100670 102700 CDS product ubiquitin E3 ligase ICPO<br>GGCGGATGCAGGCCAGGCAGAAGGCGTGCAGGCAGG                                                                                                                               | 102582-102618 7:04:01                   |

|        |        |        |        |                                                                                                        |               |          |                  |
|--------|--------|--------|--------|--------------------------------------------------------------------------------------------------------|---------------|----------|------------------|
| 102677 | 102693 | 100670 | 102700 | CDS product ubiquitin E3 ligase ICP0                                                                   | 102677-102693 | 4:01:01  | GGGGCAGCGCGGGCGG |
| 103683 | 103708 | 103673 | 107704 | CDS product transcriptional regulator ICP4<br>CCGGCCCGCCCGCGCGCCGGCC                                   | 103683-103708 | 6:03:01  |                  |
| 103744 | 103778 | 103673 | 107704 | CDS product transcriptional regulator ICP4<br>GGACGAGGACGAGGACGAGGAGGAGGAGGAGG                         | 103744-103778 | 9:06:02  |                  |
| 103804 | 103870 | 103673 | 107704 | CDS product transcriptional regulator ICP4<br>CCCGCGCCGGGGCCCGCGGCCCGCCCGCCCGCGCGCGGAAGCCCGAGCCCGCGCCC | 103804-103870 | 14:11:03 |                  |
| 103886 | 103904 | 103673 | 107704 | CDS product transcriptional regulator ICP4<br>GGCACC CGGGCCGGCGGGG                                     | 103886-103904 | 4:01:01  |                  |
| 103932 | 103948 | 103673 | 107704 | CDS product transcriptional regulator ICP4<br>CCACCAGGCCCGCCCC                                         | 103932-103948 | 5:02:01  |                  |
| 103977 | 104023 | 103673 | 107704 | CDS product transcriptional regulator ICP4<br>CCCGCGGGCCCTGGTCCGCGTCCAGTCCACGCCGGGCGCGCGGCC            | 103977-104023 | 8:05:02  |                  |
| 104011 | 104031 | 103673 | 107704 | CDS product transcriptional regulator ICP4<br>GGGCGCCGCGGCCGCGGGCGG                                    | 104011-104031 | 4:01:01  |                  |
| 104034 | 104053 | 103673 | 107704 | CDS product transcriptional regulator ICP4<br>CCGCCGCGCCTCCAGCACC                                      | 104034-104053 | 5:02:01  |                  |
| 104057 | 104090 | 103673 | 107704 | CDS product transcriptional regulator ICP4<br>GGCGGCGCCTCGGCGCGCGCTCCGGCAGCGCGG                        | 104057-104090 | 6:03:01  |                  |
| 104103 | 104116 | 103673 | 107704 | CDS product transcriptional regulator ICP4                                                             | 104103-104116 | 4:01:01  | CCACC CGCGCGGCC  |
| 104149 | 104174 | 103673 | 107704 | CDS product transcriptional regulator ICP4<br>CCGCCCCGAGGCCAGGTACACCGGCC                               | 104149-104174 | 5:02:01  |                  |
| 104158 | 104181 | 103673 | 107704 | CDS product transcriptional regulator ICP4                                                             | 104158-104181 | 4:01:01  |                  |

|                                                                           |        |        |        |                                            |               |          |                  |
|---------------------------------------------------------------------------|--------|--------|--------|--------------------------------------------|---------------|----------|------------------|
| GGCCAGGTACACCGGCCGACGCG                                                   |        |        |        |                                            |               |          |                  |
| 104199                                                                    | 104219 | 103673 | 107704 | CDS product transcriptional regulator ICP4 | 104199-104219 | 6:03:01  |                  |
| GGTTGGCGGCGCGGTGGCTGG                                                     |        |        |        |                                            |               |          |                  |
| 104220                                                                    | 104292 | 103673 | 107704 | CDS product transcriptional regulator ICP4 | 104220-104292 | 12:09:03 |                  |
| CCGCCTCGCCCTCCACGAAGTCCGGCTCCCCGAGCCCCAGCGCCGCGCCCTGCGCGGCCATGTCCTTGCGCCC |        |        |        |                                            |               |          |                  |
| 104330                                                                    | 104369 | 103673 | 107704 | CDS product transcriptional regulator ICP4 | 104330-104369 | 7:04:01  |                  |
| GGCGGCACGGGCACCGCGGTGCGCGGGCCCAGGCGCGTGG                                  |        |        |        |                                            |               |          |                  |
| 104577                                                                    | 104595 | 103673 | 107704 | CDS product transcriptional regulator ICP4 | 104577-104595 | 4:01:01  |                  |
| CCTGCCCCGACGGCCGGGCC                                                      |        |        |        |                                            |               |          |                  |
| 104641                                                                    | 104663 | 103673 | 107704 | CDS product transcriptional regulator ICP4 | 104641-104663 | 6:03:01  |                  |
| CCGCCGCCGCGCCGCGGCCAGCC                                                   |        |        |        |                                            |               |          |                  |
| 104751                                                                    | 104777 | 103673 | 107704 | CDS product transcriptional regulator ICP4 | 104751-104777 | 5:02:01  |                  |
| CCGGCGCGCCCGTCCAGCGCCCGGCC                                                |        |        |        |                                            |               |          |                  |
| 104847                                                                    | 104872 | 103673 | 107704 | CDS product transcriptional regulator ICP4 | 104847-104872 | 5:02:01  |                  |
| GGCGCGGCGGCCACTCGGGCCGCCGG                                                |        |        |        |                                            |               |          |                  |
| 104895                                                                    | 104910 | 103673 | 107704 | CDS product transcriptional regulator ICP4 | 104895-104910 | 4:01:01  | CCGCCAGCGCCTCCCC |
| 104971                                                                    | 104987 | 103673 | 107704 | CDS product transcriptional regulator ICP4 | 104971-104987 | 4:01:01  |                  |
| CCAGGCCACGCGCCGCC                                                         |        |        |        |                                            |               |          |                  |
| 105013                                                                    | 105032 | 103673 | 107704 | CDS product transcriptional regulator ICP4 | 105013-105032 | 4:01:01  |                  |
| GGGGCCCCGCGCGGCGCGGG                                                      |        |        |        |                                            |               |          |                  |
| 105074                                                                    | 105103 | 103673 | 107704 | CDS product transcriptional regulator ICP4 | 105074-105103 | 5:02:01  |                  |
| GGGCGCCAGGGCTCGGGGAAGAGCGGGTGG                                            |        |        |        |                                            |               |          |                  |
| 105105                                                                    | 105124 | 103673 | 107704 | CDS product transcriptional regulator ICP4 | 105105-105124 | 4:01:01  |                  |

|                                                                                                                    |        |        |        |                                            |               |                          |
|--------------------------------------------------------------------------------------------------------------------|--------|--------|--------|--------------------------------------------|---------------|--------------------------|
| CCGCGAGCCGCGCCGCGACC                                                                                               |        |        |        |                                            |               |                          |
| 105154                                                                                                             | 105175 | 103673 | 107704 | CDS product transcriptional regulator ICP4 | 105154-105175 | 4:01:01                  |
| GGCGCTGGGCGCGGGCGTGTGG                                                                                             |        |        |        |                                            |               |                          |
| 105184                                                                                                             | 105199 | 103673 | 107704 | CDS product transcriptional regulator ICP4 | 105184-105199 | 4:01:01 GGGCGGCACGCGGCGG |
| 105211                                                                                                             | 105237 | 103673 | 107704 | CDS product transcriptional regulator ICP4 | 105211-105237 | 6:03:01                  |
| GGCGGCGGGGCCCGGGCGGCATGGG                                                                                          |        |        |        |                                            |               |                          |
| 105249                                                                                                             | 105264 | 103673 | 107704 | CDS product transcriptional regulator ICP4 | 105249-105264 | 4:01:01 GGGCGGGCAGCGGCGG |
| 105267                                                                                                             | 105286 | 103673 | 107704 | CDS product transcriptional regulator ICP4 | 105267-105286 | 5:02:01                  |
| CCCGCCGCGCGGCCCGGCC                                                                                                |        |        |        |                                            |               |                          |
| 105278                                                                                                             | 105302 | 103673 | 107704 | CDS product transcriptional regulator ICP4 | 105278-105302 | 6:03:01                  |
| GGCCCCGCGCGTCGCGGCGGCGG                                                                                            |        |        |        |                                            |               |                          |
| 105333                                                                                                             | 105457 | 103673 | 107704 | CDS product transcriptional regulator ICP4 | 105333-105457 | 26:23:06                 |
| CCTCCCCGAGGGCCCCCGCGGCGGCCGAGGGCCGCGCTCGCCGTCCCCGTCCCCGTCCCCTTCTCCTCCTCCTCCTCCTCCTCCTCGGCCCTTCTTCCTTCCCTCGGACCC    |        |        |        |                                            |               |                          |
| 105355                                                                                                             | 105368 | 103673 | 107704 | CDS product transcriptional regulator ICP4 | 105355-105368 | 4:01:01 GGCGGCCGCGCAGGG  |
| 105467                                                                                                             | 105673 | 103673 | 107704 | CDS product transcriptional regulator ICP4 | 105467-105673 | 44:41:11                 |
| CCCGCCGCGGGCGGGGCGGCCCTCTTCCTCCTCTTCCTCCTCTTCCTCCTCTTCCTCCTTTTCCTCCTCTTCCTCCTCTTCGCGCTCTTCGTCTCCCGTCCTCCCGTCCTCCGC |        |        |        |                                            |               |                          |
| CTCGGACCCGTCCTCCGGTCCGCCCCGCGGCCCCGGCCCTCATGTCTCCACCTCCACTTCCACCGCCCCCGGCC                                         |        |        |        |                                            |               |                          |
| 105662                                                                                                             | 105695 | 103673 | 107704 | CDS product transcriptional regulator ICP4 | 105662-105695 | 7:04:01                  |
| GGCCCCGGCCCCGCGCGGCGGCGCGCGCGG                                                                                     |        |        |        |                                            |               |                          |
| 105686                                                                                                             | 105721 | 103673 | 107704 | CDS product transcriptional regulator ICP4 | 105686-105721 | 8:05:02                  |
| CCGGCGCGGCGCCCCCGCGGCGGCCTCCAGGGCC                                                                                 |        |        |        |                                            |               |                          |
| 105732                                                                                                             | 105757 | 103673 | 107704 | CDS product transcriptional regulator ICP4 | 105732-105757 | 7:04:01                  |
| CCGCCAGCCGCGCGGCACCTCCGCC                                                                                          |        |        |        |                                            |               |                          |

|                                                        |        |        |        |                                            |               |         |                |
|--------------------------------------------------------|--------|--------|--------|--------------------------------------------|---------------|---------|----------------|
| 105840                                                 | 105871 | 103673 | 107704 | CDS product transcriptional regulator ICP4 | 105840-105871 | 7:04:01 |                |
| CCACGGTCCGCGCCGCCAGCGCGCCGCCTCC                        |        |        |        |                                            |               |         |                |
| 105984                                                 | 106006 | 103673 | 107704 | CDS product transcriptional regulator ICP4 | 105984-106006 | 4:01:01 |                |
| CCGGGTGCGCCGCCAGCGGTCC                                 |        |        |        |                                            |               |         |                |
| 106007                                                 | 106036 | 103673 | 107704 | CDS product transcriptional regulator ICP4 | 106007-106036 | 6:03:01 |                |
| GGCGCGCAGGCCGCGGCCGGCAGGCCGCGG                         |        |        |        |                                            |               |         |                |
| 106017                                                 | 106074 | 103673 | 107704 | CDS product transcriptional regulator ICP4 | 106017-106074 | 9:06:02 |                |
| CCGCGGCCGGCAGGCCGCGGCCCGCGGCCGAGAGCACCGGGAGCCCGGCGCGCC |        |        |        |                                            |               |         |                |
| 106058                                                 | 106088 | 103673 | 107704 | CDS product transcriptional regulator ICP4 | 106058-106088 | 7:04:01 |                |
| GGGAGCCCGGCGGCCGGCGCGCGCGGGG                           |        |        |        |                                            |               |         |                |
| 106089                                                 | 106102 | 103673 | 107704 | CDS product transcriptional regulator ICP4 | 106089-106102 | 4:01:01 | CCGCCTCCAGCGCC |
| 106107                                                 | 106126 | 103673 | 107704 | CDS product transcriptional regulator ICP4 | 106107-106126 | 4:01:01 |                |
| GGCAGGCGACGGCGCAGCGG                                   |        |        |        |                                            |               |         |                |
| 106155                                                 | 106174 | 103673 | 107704 | CDS product transcriptional regulator ICP4 | 106155-106174 | 4:01:01 |                |
| CCGCCCCGCGCGTGCTCGCC                                   |        |        |        |                                            |               |         |                |
| 106175                                                 | 106191 | 103673 | 107704 | CDS product transcriptional regulator ICP4 | 106175-106191 | 4:01:01 |                |
| GGCGGCAGGGGCGCCGG                                      |        |        |        |                                            |               |         |                |
| 106244                                                 | 106276 | 103673 | 107704 | CDS product transcriptional regulator ICP4 | 106244-106276 | 7:04:01 |                |
| CCGCTGCCGCGCGCGCCGCTCCGGGTAGGCC                        |        |        |        |                                            |               |         |                |
| 106255                                                 | 106283 | 103673 | 107704 | CDS product transcriptional regulator ICP4 | 106255-106283 | 6:03:01 |                |
| GGCGCCGGCCTCCGGGTAGGCCATGGGG                           |        |        |        |                                            |               |         |                |
| 106338                                                 | 106358 | 103673 | 107704 | CDS product transcriptional regulator ICP4 | 106338-106358 | 4:01:01 |                |
| GGCGGCTCATGGCCACGCAGG                                  |        |        |        |                                            |               |         |                |

|        |        |        |        |                                                                                                  |               |          |                  |
|--------|--------|--------|--------|--------------------------------------------------------------------------------------------------|---------------|----------|------------------|
| 106566 | 106582 | 103673 | 107704 | CDS product transcriptional regulator ICP4<br>CCAGGTCCACCAGCGCC                                  | 106566-106582 | 4:01:01  |                  |
| 106594 | 106612 | 103673 | 107704 | CDS product transcriptional regulator ICP4<br>CCCCGCGTCCCCATCTCC                                 | 106594-106612 | 4:01:01  |                  |
| 106626 | 106645 | 103673 | 107704 | CDS product transcriptional regulator ICP4<br>CCGCGGGCCCCGCGGCCGCC                               | 106626-106645 | 4:01:01  |                  |
| 106728 | 106743 | 103673 | 107704 | CDS product transcriptional regulator ICP4                                                       | 106728-106743 | 5:02:01  | GGCCGGGCGGCGGCGG |
| 106751 | 106767 | 103673 | 107704 | CDS product transcriptional regulator ICP4<br>CCGGGCCACGCCTCGCC                                  | 106751-106767 | 4:01:01  |                  |
| 106860 | 106878 | 103673 | 107704 | CDS product transcriptional regulator ICP4<br>GGCGCCGCGGCGGGGGGG                                 | 106860-106878 | 5:02:01  |                  |
| 106889 | 106943 | 103673 | 107704 | CDS product transcriptional regulator ICP4<br>GGCGGCGAGGGCGCCGGGGGCCGGGCGCGGCCCGCGGGCGCCGGGCCCCG | 106889-106943 | 10:07:02 |                  |
| 106934 | 106951 | 103673 | 107704 | CDS product transcriptional regulator ICP4<br>CCGGGCCCCGCGCCCGCC                                 | 106934-106951 | 4:01:01  |                  |
| 106958 | 106982 | 103673 | 107704 | CDS product transcriptional regulator ICP4<br>GGGGCCGCTTTGGTTCTGGTCCCGG                          | 106958-106982 | 4:01:01  |                  |
| 106978 | 107014 | 103673 | 107704 | CDS product transcriptional regulator ICP4<br>CCCGGCCCCAGTCCCGGCTCAGCCTCGGCCTCGGCC               | 106978-107014 | 7:04:01  |                  |
| 107035 | 107070 | 103673 | 107704 | CDS product transcriptional regulator ICP4<br>CCCCTCCCGGGCCTCGCCCCATCGTCCTCGGGCCC                | 107035-107070 | 7:04:01  |                  |
| 107085 | 107109 | 103673 | 107704 | CDS product transcriptional regulator ICP4<br>CCTCGGGCCCGCTGTCCTCGGACCC                          | 107085-107109 | 4:01:01  |                  |



|                                                                            |        |        |        |                                            |               |          |             |
|----------------------------------------------------------------------------|--------|--------|--------|--------------------------------------------|---------------|----------|-------------|
| 107124                                                                     | 107200 | 103673 | 107704 | CDS product transcriptional regulator ICP4 | 107124-107200 | 13:10:03 |             |
| CCTCGGGCCCAACGTCGCCGGCCTCGGTCTGGCCCCGAGGGACCGCCGCCCCCGCCTCAGTCCCCGCTTCGGCC |        |        |        |                                            |               |          |             |
| 107143                                                                     | 107165 | 103673 | 107704 | CDS product transcriptional regulator ICP4 | 107143-107165 | 4:01:01  |             |
| GGCCTCGGTCTGGCCCCGAGGG                                                     |        |        |        |                                            |               |          |             |
| 107211                                                                     | 107221 | 103673 | 107704 | CDS product transcriptional regulator ICP4 | 107211-107221 | 4:01:01  | CCGCCCCCGCC |
| 107224                                                                     | 107264 | 103673 | 107704 | CDS product transcriptional regulator ICP4 | 107224-107264 | 7:04:01  |             |
| GGCTTCGATGGCGGCGGCTATGACGGCCGCTTCGGCCGCGG                                  |        |        |        |                                            |               |          |             |
| 107250                                                                     | 107302 | 103673 | 107704 | CDS product transcriptional regulator ICP4 | 107250-107302 | 12:09:03 |             |
| CCGCTTCGGCCGCGGCGCCTCCGCCCCGGCCGCGCCGCTCCACCGCGACC                         |        |        |        |                                            |               |          |             |
| 107334                                                                     | 107365 | 103673 | 107704 | CDS product transcriptional regulator ICP4 | 107334-107365 | 8:05:02  |             |
| CCGCGTCCTCCGCGCCTCCGCCCCCTCGGCC                                            |        |        |        |                                            |               |          |             |
| 107376                                                                     | 107437 | 103673 | 107704 | CDS product transcriptional regulator ICP4 | 107376-107437 | 10:07:02 |             |
| CCGCGACGTCCGCGTCCTCGGCGCCCCCGCGTCCCTGGCGCCGGCGTCCTCGCCGATCTCC              |        |        |        |                                            |               |          |             |
| 107446                                                                     | 107465 | 103673 | 107704 | CDS product transcriptional regulator ICP4 | 107446-107465 | 4:01:01  |             |
| GGCCTCGGCGCCCTCGGTGG                                                       |        |        |        |                                            |               |          |             |
| 107448                                                                     | 107491 | 103673 | 107704 | CDS product transcriptional regulator ICP4 | 107448-107491 | 7:04:01  |             |
| CCTCGGCGCCCTCGGTGGCCCCCGGTCTCCGGCGCCGTCGTCC                                |        |        |        |                                            |               |          |             |
| 107502                                                                     | 107528 | 103673 | 107704 | CDS product transcriptional regulator ICP4 | 107502-107528 | 7:04:01  |             |
| CCGCGTCCTCCCCGCCACCATCCGCC                                                 |        |        |        |                                            |               |          |             |
| 107536                                                                     | 107563 | 103673 | 107704 | CDS product transcriptional regulator ICP4 | 107536-107563 | 5:02:01  |             |
| GGCCAGCTCGGCGGGGCGGCCCGCCGG                                                |        |        |        |                                            |               |          |             |
| 107604                                                                     | 107641 | 103673 | 107704 | CDS product transcriptional regulator ICP4 | 107604-107641 | 7:04:01  |             |
| CCGGGTCTCCTCCGAGCCCCCGTCGGGCCGAGGTCC                                       |        |        |        |                                            |               |          |             |

|                                                                               |        |        |        |                                      |               |          |                      |
|-------------------------------------------------------------------------------|--------|--------|--------|--------------------------------------|---------------|----------|----------------------|
| 112804                                                                        | 112830 | 112768 | 113670 | CDS product regulatory protein ICP22 | 112804-112830 | 6:03:01  |                      |
| CCTGCCGCTCTGCCGCTGCCCCGACC                                                    |        |        |        |                                      |               |          |                      |
| 112871                                                                        | 112895 | 112768 | 113670 | CDS product regulatory protein ICP22 | 112871-112895 | 4:01:01  |                      |
| CCGCGGCCCCGGGCGCCTTCTGCCCC                                                    |        |        |        |                                      |               |          |                      |
| 113088                                                                        | 113112 | 112768 | 113670 | CDS product regulatory protein ICP22 | 113088-113112 | 4:01:01  |                      |
| CCCGAGCAGGCCGGCCCCGCTGCGCC                                                    |        |        |        |                                      |               |          |                      |
| 113125                                                                        | 113144 | 112768 | 113670 | CDS product regulatory protein ICP22 | 113125-113144 | 6:03:01  | CCGCCGCCGCCCGGGCCCC  |
| 113153                                                                        | 113185 | 112768 | 113670 | CDS product regulatory protein ICP22 | 113153-113185 | 6:03:01  |                      |
| CCCGCTGTCGCCCCCGGCGCGCCTGCCGGGCCC                                             |        |        |        |                                      |               |          |                      |
| 113243                                                                        | 113292 | 112768 | 113670 | CDS product regulatory protein ICP22 | 113243-113292 | 13:10:03 |                      |
| GGAGGACGAGGAGCGGACGAGGAGGGGAGGAGAACGGCGGCGAGGGGG                              |        |        |        |                                      |               |          |                      |
| 113293                                                                        | 113372 | 112768 | 113670 | CDS product regulatory protein ICP22 | 113293-113372 | 17:14:04 |                      |
| CCGCCGCCGAAAGCCCCCCCCCGGTGCCGCCGCGAGCCGGTCCTCTCCTCCGCCTCGCCCGGGCCTCGGCCGTCTCC |        |        |        |                                      |               |          |                      |
| 113385                                                                        | 113408 | 112768 | 113670 | CDS product regulatory protein ICP22 | 113385-113408 | 6:03:01  |                      |
| CCCACCGCTCCTCTTCCACCTCC                                                       |        |        |        |                                      |               |          |                      |
| 113462                                                                        | 113519 | 112768 | 113670 | CDS product regulatory protein ICP22 | 113462-113519 | 10:07:02 |                      |
| CCCCGGGCCCCGGGACCCGCGCCCCGGCGCGCGGGCCCCGGCGCCGGCGGCCCCCCC                     |        |        |        |                                      |               |          |                      |
| 113486                                                                        | 113512 | 112768 | 113670 | CDS product regulatory protein ICP22 | 113486-113512 | 6:03:01  |                      |
| GGCCGGCGCCGGGCCCGGCGCCGGCGG                                                   |        |        |        |                                      |               |          |                      |
| 113531                                                                        | 113549 | 112768 | 113670 | CDS product regulatory protein ICP22 | 113531-113549 | 4:01:01  | CCGGCGCCGGCCCCGCGCCC |
| 113563                                                                        | 113602 | 112768 | 113670 | CDS product regulatory protein ICP22 | 113563-113602 | 8:05:02  |                      |
| CCTCCGGCTCCTCGCCGGGCTCCTCGCCATACCCGTCGCC                                      |        |        |        |                                      |               |          |                      |
| 113637                                                                        | 113658 | 112768 | 113670 | CDS product regulatory protein ICP22 | 113637-113658 | 5:02:01  |                      |

|                                               |        |        |        |                                                 |               |         |                             |
|-----------------------------------------------|--------|--------|--------|-------------------------------------------------|---------------|---------|-----------------------------|
| CCCGCGCCGCCAAGCGCCGCC                         |        |        |        |                                                 |               |         |                             |
| 114547                                        | 114566 | 114213 | 114944 | CDS product virion protein V67                  | 114547-114566 | 4:01:01 | CCGCCAGCGGGCCTCGTCC         |
| 114642                                        | 114658 | 114213 | 114944 | CDS product virion protein V67                  | 114642-114658 | 4:01:01 | GGTCGGCGCGCGCGGG            |
| 114730                                        | 114754 | 114213 | 114944 | CDS product virion protein V67                  | 114730-114754 | 4:01:01 | GGGGCTTGGACGAGGGCACCACCGG   |
| 114824                                        | 114862 | 114213 | 114944 | CDS product virion protein V67                  | 114824-114862 | 8:05:02 |                             |
| CCAGCCACCAAGCCCCCTCGCATCCGGGACCGGTGCC         |        |        |        |                                                 |               |         |                             |
| 114851                                        | 114879 | 114213 | 114944 | CDS product virion protein V67                  | 114851-114879 | 6:03:01 |                             |
| GGGACCGGTGCCGGGTCGCGGTGCGGG                   |        |        |        |                                                 |               |         |                             |
| 115118                                        | 115129 | 115001 | 115663 | CDS product virion protein US2                  | 115118-115129 | 4:01:01 | CCACCGGCCACC                |
| 115136                                        | 115168 | 115001 | 115663 | CDS product virion protein US2                  | 115136-115168 | 5:02:01 |                             |
| GGGAGTGTGCGGGTATCGTAGGGCGGCCACGGG             |        |        |        |                                                 |               |         |                             |
| 115179                                        | 115213 | 115001 | 115663 | CDS product virion protein US2                  | 115179-115213 | 7:04:01 |                             |
| CCGGGCCGCGCCGGGAGCCGCCACGCCGCTCCC             |        |        |        |                                                 |               |         |                             |
| 115358                                        | 115384 | 115001 | 115663 | CDS product virion protein US2                  | 115358-115384 | 5:02:01 | CCGTCGACCACGCTGACCCACTCCGCC |
| 115385                                        | 115432 | 115001 | 115663 | CDS product virion protein US2                  | 115385-115432 | 9:06:02 |                             |
| GGTTGGCGGTGGCGGGCTAAGCCGGCGCCCCGGCGCGGCCAAGGG |        |        |        |                                                 |               |         |                             |
| 115530                                        | 115562 | 115001 | 115663 | CDS product virion protein US2                  | 115530-115562 | 5:02:01 |                             |
| CCGTCGTCCCAGCCGGCTTGCCGTCAGCGCCC              |        |        |        |                                                 |               |         |                             |
| 115999                                        | 116021 | 115796 | 117202 | CDS product serine/threonine protein kinase US3 | 115999-116021 | 6:03:01 |                             |
| CCGCCGGCCAGAACCGGTCCGCC                       |        |        |        |                                                 |               |         |                             |
| 116014                                        | 116047 | 115796 | 117202 | CDS product serine/threonine protein kinase US3 | 116014-116047 | 6:03:01 |                             |
| GGTCCGCCGACGCGGACGGGATCGAAGGGGGG              |        |        |        |                                                 |               |         |                             |
| 116473                                        | 116497 | 115796 | 117202 | CDS product serine/threonine protein kinase US3 | 116473-116497 | 4:01:01 |                             |

|                                             |                                                 |               |         |                       |  |  |
|---------------------------------------------|-------------------------------------------------|---------------|---------|-----------------------|--|--|
| GGGGAGCTGGTGTGCGTGCTGG                      |                                                 |               |         |                       |  |  |
| 116562 116581 115796 117202                 | CDS product serine/threonine protein kinase US3 | 116562-116581 | 4:01:01 |                       |  |  |
| GGCGCTGGCGGTGACGCGGG                        |                                                 |               |         |                       |  |  |
| 116595 116617 115796 117202                 | CDS product serine/threonine protein kinase US3 | 116595-116617 | 4:01:01 |                       |  |  |
| CCTCGCGTACCTGCACTCCCGCC                     |                                                 |               |         |                       |  |  |
| 116682 116710 115796 117202                 | CDS product serine/threonine protein kinase US3 | 116682-116710 | 5:02:01 |                       |  |  |
| GGGCGACTTTGGCGCGGCACACGGGCCGG               |                                                 |               |         |                       |  |  |
| 116731 116749 115796 117202                 | CDS product serine/threonine protein kinase US3 | 116731-116749 | 4:01:01 |                       |  |  |
| GGCCTGGCCGGCACCTGG                          |                                                 |               |         |                       |  |  |
| 116871 116903 115796 117202                 | CDS product serine/threonine protein kinase US3 | 116871-116903 | 5:02:01 |                       |  |  |
| GGGCCCCGAGGGCGAGGACGCCGAGGCATCGGG           |                                                 |               |         |                       |  |  |
| 116989 117016 115796 117202                 | CDS product serine/threonine protein kinase US3 | 116989-117016 | 5:02:01 |                       |  |  |
| CCACCCAGCCCCACTGACCGGCTGACCC                |                                                 |               |         |                       |  |  |
| 117045 117073 115796 117202                 | CDS product serine/threonine protein kinase US3 | 117045-117073 | 5:02:01 |                       |  |  |
| CCGAGAGCCGCACAGCCCGTACCGCTGCC               |                                                 |               |         |                       |  |  |
| 117084 117118 115796 117202                 | CDS product serine/threonine protein kinase US3 | 117084-117118 | 7:04:01 |                       |  |  |
| CCGGCTGCCCTGCGACGCCGACCGCCTCCTACACC         |                                                 |               |         |                       |  |  |
| 117339 117381 117337 118671                 | CDS product envelope glycoprotein G             | 117339-117381 | 9:06:02 |                       |  |  |
| CCTGCCGCCCCGACCGGCACCTTGGCCGCCGTCGCCCTAATCC |                                                 |               |         |                       |  |  |
| 117462 117500 117337 118671                 | CDS product envelope glycoprotein G             | 117462-117500 | 7:04:01 |                       |  |  |
| CCCTCCCGCCCGCTGGGGCCCGTCCTGAACCTAGCGGCC     |                                                 |               |         |                       |  |  |
| 117517 117537 117337 118671                 | CDS product envelope glycoprotein G             | 117517-117537 | 4:01:01 | GGGTTTCGGTGCGCGCGGTGG |  |  |
| 117560 117598 117337 118671                 | CDS product envelope glycoprotein G             | 117560-117598 | 8:05:02 |                       |  |  |

|                                                                                     |        |        |        |                                     |               |                                 |
|-------------------------------------------------------------------------------------|--------|--------|--------|-------------------------------------|---------------|---------------------------------|
| GGCCCTCTTGACATGGCGGAGACGGTGGTGGCCGCGG                                               |        |        |        |                                     |               |                                 |
| 117591                                                                              | 117611 | 117337 | 118671 | CDS product envelope glycoprotein G | 117591-117611 | 4:01:01 CCCGGCGGACCGCGAGCCGCC   |
| 117803                                                                              | 117827 | 117337 | 118671 | CDS product envelope glycoprotein G | 117803-117827 | 4:01:01                         |
| CCCCGGCCTGTACGACCGCGGGACC                                                           |        |        |        |                                     |               |                                 |
| 117918                                                                              | 117942 | 117337 | 118671 | CDS product envelope glycoprotein G | 117918-117942 | 5:02:01                         |
| GGGCTGGACCGAGGGCTCGGTGTGG                                                           |        |        |        |                                     |               |                                 |
| 118232                                                                              | 118250 | 117337 | 118671 | CDS product envelope glycoprotein G | 118232-118250 | 4:01:01 CCGGACCGCCAGCGGGCCC     |
| 118406                                                                              | 118456 | 117337 | 118671 | CDS product envelope glycoprotein G | 118406-118456 | 9:06:02                         |
| CCAGGAGCCCGCTCGCTCGAGCGCGCCCGATGCCCGCGCCACCGATCC                                    |        |        |        |                                     |               |                                 |
| 118475                                                                              | 118493 | 117337 | 118671 | CDS product envelope glycoprotein G | 118475-118493 | 4:01:01 CCTGCCCCGATGACCCCGCC    |
| 118573                                                                              | 118595 | 117337 | 118671 | CDS product envelope glycoprotein G | 118573-118595 | 4:01:01 CCTGCCGGCTCGCCCGCGCAGCC |
| 118612                                                                              | 118631 | 117337 | 118671 | CDS product envelope glycoprotein G | 118612-118631 | 4:01:01 CCCGCGCCGCCACGTCGCC     |
| 118987                                                                              | 119007 | 118896 | 120149 | CDS product envelope glycoprotein D | 118987-119007 | 4:01:01 CCCGCCGGCGTACCCGATGCC   |
| 119040                                                                              | 119059 | 118896 | 120149 | CDS product envelope glycoprotein D | 119040-119059 | 4:01:01 CCGGGCCCATAACGTCGCC     |
| 119299                                                                              | 119316 | 118896 | 120149 | CDS product envelope glycoprotein D | 119299-119316 | 4:01:01 CCGCTACCGCACACCCCC      |
| 119690                                                                              | 119704 | 118896 | 120149 | CDS product envelope glycoprotein D | 119690-119704 | 5:02:01 CCGCCGCCTGCCGCC         |
| 119715                                                                              | 119728 | 118896 | 120149 | CDS product envelope glycoprotein D | 119715-119728 | 4:01:01 CCCCCGCGCCACCC          |
| 119740                                                                              | 119823 | 118896 | 120149 | CDS product envelope glycoprotein D | 119740-119823 | 13:10:03                        |
| GGCCCGCGAGGATGAAGGGGAGACCGAGGACGGGGCAGCCGGGCGGGAGGGCAACGGCGGCCCCCAGGACCCGAAGGCGACGG |        |        |        |                                     |               |                                 |
| 119867                                                                              | 119902 | 118896 | 120149 | CDS product envelope glycoprotein D | 119867-119902 | 7:04:01                         |
| CCGAAACCCGGCCCCAGCCCCGACGCCGACCGCCCC                                                |        |        |        |                                     |               |                                 |
| 119935                                                                              | 119979 | 118896 | 120149 | CDS product envelope glycoprotein D | 119935-119979 | 10:07:02                        |
| CCCCCGCCCCGCCCCGCTACGCCCGCGCCCCGACGCCGTGCC                                          |        |        |        |                                     |               |                                 |

|                                                          |        |        |        |                                     |
|----------------------------------------------------------|--------|--------|--------|-------------------------------------|
| 119990                                                   | 120011 | 118896 | 120149 | CDS product envelope glycoprotein D |
| 120027                                                   | 120040 | 118896 | 120149 | CDS product envelope glycoprotein D |
| 120305                                                   | 120319 | 120287 | 121435 | CDS product envelope glycoprotein I |
| 120450                                                   | 120471 | 120287 | 121435 | CDS product envelope glycoprotein I |
| 120548                                                   | 120566 | 120287 | 121435 | CDS product envelope glycoprotein I |
| 120584                                                   | 120606 | 120287 | 121435 | CDS product envelope glycoprotein I |
| 120671                                                   | 120689 | 120287 | 121435 | CDS product envelope glycoprotein I |
| 120721                                                   | 120743 | 120287 | 121435 | CDS product envelope glycoprotein I |
| 120802                                                   | 120840 | 120287 | 121435 | CDS product envelope glycoprotein I |
| CCCGGAGACCCAGAGCCGCGCCGCGCACCCCGGCGCC                    |        |        |        |                                     |
| 120921                                                   | 120954 | 120287 | 121435 | CDS product envelope glycoprotein I |
| CCCCGCAGGCGCGCCACCACGCCCGGCCCCACC                        |        |        |        |                                     |
| 121043                                                   | 121101 | 120287 | 121435 | CDS product envelope glycoprotein I |
| CCCTCACCACGCCCCGCGCGCCTGACCGCCAGCCCCGCGCCAGCCCCTCCCGTGCC |        |        |        |                                     |
| 121112                                                   | 121125 | 120287 | 121435 | CDS product envelope glycoprotein I |
| 121254                                                   | 121268 | 120287 | 121435 | CDS product envelope glycoprotein I |
| 121357                                                   | 121374 | 120287 | 121435 | CDS product envelope glycoprotein I |
| 121380                                                   | 121402 | 120287 | 121435 | CDS product envelope glycoprotein I |
| 121391                                                   | 121419 | 120287 | 121435 | CDS product envelope glycoprotein I |
| CCCGGCCAAAGGCGCCCCCTCGCCACC                              |        |        |        |                                     |
| 121719                                                   | 121734 | 121714 | 123441 | CDS product envelope glycoprotein E |
| 121789                                                   | 121816 | 121714 | 123441 | CDS product envelope glycoprotein E |
| CCGAGGCCAAGCCCGCGACCGAAACCCC                             |        |        |        |                                     |

|               |          |                         |
|---------------|----------|-------------------------|
| 119990-120011 | 4:01:01  | GGGATCGGCATTGCGGCTGCGG  |
| 120027-120040 | 5:02:01  | CCGCCGCGCGCC            |
| 120305-120319 | 4:01:01  | GGATGGTGGTGCTGG         |
| 120450-120471 | 4:01:01  | CCTGGAACACCAGCTCCCGGCC  |
| 120548-120566 | 4:01:01  | CCGCGTTCGCCTCCTGCCC     |
| 120584-120606 | 4:01:01  | CCTTTCGCTCCTGCCTGCACGCC |
| 120671-120689 | 4:01:01  | CCATCGCCCATCCGCGCCC     |
| 120721-120743 | 4:01:01  | GGCATCTACGGCGGCACCGCGGG |
| 120802-120840 | 6:03:01  |                         |
| 120921-120954 | 7:04:01  |                         |
| 121043-121101 | 14:11:03 |                         |
| 121112-121125 | 4:01:01  | CCGCCCCGGCGCC           |
| 121254-121268 | 4:01:01  | CCGCCGCTGCTGCC          |
| 121357-121374 | 4:01:01  | CCGAGCGCCCCAGCCACC      |
| 121380-121402 | 4:01:01  | GGCACTGGGCTCCCGGCCAAAGG |
| 121391-121419 | 6:03:01  |                         |
| 121719-121734 | 4:01:01  | CCCACCGCGCGCCCC         |
| 121789-121816 | 5:02:01  |                         |

|                                                                                                                                         |                                                |
|-----------------------------------------------------------------------------------------------------------------------------------------|------------------------------------------------|
| 121817 121848 121714 123441 CDS product envelope glycoprotein E<br>GGGCTCGGCTTCGGTCGACACGGTCTTCACGG                                     | 121817-121848 5:02:01                          |
| 121936 121977 121714 123441 CDS product envelope glycoprotein E<br>CCTGCTCGCCGCCCGTGCCGAGCCCGTCTGCCTCGACGACC                            | 121936-121977 7:04:01                          |
| 122011 122045 121714 123441 CDS product envelope glycoprotein E<br>CCTGCCTGCGAACC GCCCGCGTGGCCCCGCTGGCC                                 | 122011-122045 6:03:01                          |
| 122168 122179 121714 123441 CDS product envelope glycoprotein E                                                                         | 122168-122179 4:01:01 GGAGGACGGCGG             |
| 122200 122226 121714 123441 CDS product envelope glycoprotein E<br>GGCTCATCGGCGACGCCGGCGACGAGG                                          | 122200-122226 4:01:01                          |
| 122252 122275 121714 123441 CDS product envelope glycoprotein E                                                                         | 122252-122275 4:01:01 GGTCGCGACGGCCGGCGCGCAGGG |
| 122301 122337 121714 123441 CDS product envelope glycoprotein E<br>CCAGCGACCGGGCCACCCCGGCCCGCCGCCCCACC                                  | 122301-122337 9:06:02                          |
| 122555 122588 121714 123441 CDS product envelope glycoprotein E<br>CCACCCCGAGGCACCGGCCTGCCTGCACCCCGCC                                   | 122555-122588 7:04:01                          |
| 122613 122630 121714 123441 CDS product envelope glycoprotein E                                                                         | 122613-122630 4:01:01 CCGTACCGCTCCGAGACC       |
| 122657 122672 121714 123441 CDS product envelope glycoprotein E                                                                         | 122657-122672 4:01:01 CCGCCCGGACCCTGCC         |
| 122881 122950 121714 123441 CDS product envelope glycoprotein E<br>CCGACCACACGCGCCCCGAGGCCGAGCCGCCGACGCTCCCGAGCCAGGCCACCGCTCACCAGCGAGCC | 122881-122950 12:09:03                         |
| 122961 122978 121714 123441 CDS product envelope glycoprotein E                                                                         | 122961-122978 4:01:01 CCCACCGGGCCCGCGCCC       |
| 122980 123025 121714 123441 CDS product envelope glycoprotein E<br>GGCTTGTGGTGCTGGTGGGCGCGCTTGACTCGCGGGACTGGTGGG                        | 122980-123025 8:05:02                          |
| 123089 123136 121714 123441 CDS product envelope glycoprotein E<br>CCTCAACCCCTTCGGGCCCGTATACACCAGCTTGCCGACCAACGAGCC                     | 123089-123136 7:04:01                          |

|                                                                           |        |        |        |                                      |               |                                 |
|---------------------------------------------------------------------------|--------|--------|--------|--------------------------------------|---------------|---------------------------------|
| 123247                                                                    | 123274 | 121714 | 123441 | CDS product envelope glycoprotein E  | 123247-123274 | 5:02:01                         |
| CCTACGACCTCGCCGGCGCCCCAGAGCC                                              |        |        |        |                                      |               |                                 |
| 123610                                                                    | 123626 | 123548 | 123982 | CDS product membrane protein US9     | 123610-123626 | 5:02:01 CCCCTTCACCGCCGCC        |
| 123635                                                                    | 123655 | 123548 | 123982 | CDS product membrane protein US9     | 123635-123655 | 4:01:01 CCATCGTGTCCATCCCCATCC   |
| 123698                                                                    | 123720 | 123548 | 123982 | CDS product membrane protein US9     | 123698-123720 | 4:01:01 CCGGCACCGCGGCAGCCGCACCC |
| 123843                                                                    | 123876 | 123548 | 123982 | CDS product membrane protein US9     | 123843-123876 | 8:05:02                         |
| GGGGCGGCAGCAGCGGCGGCGGCATCGGCGGCGG                                        |        |        |        |                                      |               |                                 |
| 123910                                                                    | 123944 | 123548 | 123982 | CDS product membrane protein US9     | 123910-123944 | 7:04:01                         |
| GGCCTCGGGCCTGCGCGGCGGCGGCAGCGGCAGG                                        |        |        |        |                                      |               |                                 |
| 124558                                                                    | 124579 | 124548 | 125450 | CDS product regulatory protein ICP22 | 124558-124579 | 5:02:01                         |
| GGCGGCGCTTGCCGCGCGGG                                                      |        |        |        |                                      |               |                                 |
| 124614                                                                    | 124653 | 124548 | 125450 | CDS product regulatory protein ICP22 | 124614-124653 | 8:05:02                         |
| GGCGACGGGTATGGCGAGGAGCCCGGCGAGGAGCCGGAGG                                  |        |        |        |                                      |               |                                 |
| 124667                                                                    | 124685 | 124548 | 125450 | CDS product regulatory protein ICP22 | 124667-124685 | 4:01:01 GGGCGGGGCCGGCGCCGG      |
| 124697                                                                    | 124754 | 124548 | 125450 | CDS product regulatory protein ICP22 | 124697-124754 | 10:07:02                        |
| GGGGGGCCGCCGCGCCGGGCCCCGCGCCGGCGGGTCCCCGGGCCCCGGG                         |        |        |        |                                      |               |                                 |
| 124704                                                                    | 124730 | 124548 | 125450 | CDS product regulatory protein ICP22 | 124704-124730 | 6:03:01                         |
| CCGCCGCGCCGGGCCCCGCGCCGGCC                                                |        |        |        |                                      |               |                                 |
| 124808                                                                    | 124831 | 124548 | 125450 | CDS product regulatory protein ICP22 | 124808-124831 | 6:03:01                         |
| GGAGGTGGAAGAGGACGCGGTGGG                                                  |        |        |        |                                      |               |                                 |
| 124844                                                                    | 124923 | 124548 | 125450 | CDS product regulatory protein ICP22 | 124844-124923 | 17:14:04                        |
| GGAGACGGCCGAGGCCGCGGGCGAGGCGGAGAGGACCGGGCTCGGGCGGCACCGGGGGGGCTTTCGGCGGCGG |        |        |        |                                      |               |                                 |
| 124924                                                                    | 124973 | 124548 | 125450 | CDS product regulatory protein ICP22 | 124924-124973 | 13:10:03                        |



|                                                               |        |        |        |     |         |                           |       |               |          |
|---------------------------------------------------------------|--------|--------|--------|-----|---------|---------------------------|-------|---------------|----------|
| 125031                                                        | 125063 | 124548 | 125450 | CDS | product | regulatory protein        | ICP22 | 125031-125063 | 6:03:01  |
| GGGCCCCGGCAGGCGCGCCGGGGCGACAGCGGG                             |        |        |        |     |         |                           |       |               |          |
| 125072                                                        | 125091 | 124548 | 125450 | CDS | product | regulatory protein        | ICP22 | 125072-125091 | 6:03:01  |
| 125104                                                        | 125128 | 124548 | 125450 | CDS | product | regulatory protein        | ICP22 | 125104-125128 | 4:01:01  |
| GGCGCAGCGGGCCGGCCTGCTCGGG                                     |        |        |        |     |         |                           |       |               |          |
| 125321                                                        | 125345 | 124548 | 125450 | CDS | product | regulatory protein        | ICP22 | 125321-125345 | 4:01:01  |
| GGGGCAGAAGGCGCCCGGGCCGCGG                                     |        |        |        |     |         |                           |       |               |          |
| 125386                                                        | 125412 | 124548 | 125450 | CDS | product | regulatory protein        | ICP22 | 125386-125412 | 6:03:01  |
| GGTCGGGCGAGCGGCAGAGGCGGCAGG                                   |        |        |        |     |         |                           |       |               |          |
| 130575                                                        | 130612 | 130514 | 134545 | CDS | product | transcriptional regulator | ICP4  | 130575-130612 | 7:04:01  |
| GGACCTCGGCCCGACGGGGGGCTCGGAGGAAGACCCGG                        |        |        |        |     |         |                           |       |               |          |
| 130653                                                        | 130680 | 130514 | 134545 | CDS | product | transcriptional regulator | ICP4  | 130653-130680 | 5:02:01  |
| CCGGCGGGCCGCCCGCGCCGAGCTGGCC                                  |        |        |        |     |         |                           |       |               |          |
| 130688                                                        | 130714 | 130514 | 134545 | CDS | product | transcriptional regulator | ICP4  | 130688-130714 | 7:04:01  |
| GGCGGATGGTGGGCGGGGAGGACGCGG                                   |        |        |        |     |         |                           |       |               |          |
| 130725                                                        | 130768 | 130514 | 134545 | CDS | product | transcriptional regulator | ICP4  | 130725-130768 | 7:04:01  |
| GGACGACGGCGCCGAGACGCGGGGGCCACCGAGGGCGCCGAGG                   |        |        |        |     |         |                           |       |               |          |
| 130751                                                        | 130770 | 130514 | 134545 | CDS | product | transcriptional regulator | ICP4  | 130751-130770 | 4:01:01  |
| CCACCGAGGGCGCCGAGGCC                                          |        |        |        |     |         |                           |       |               |          |
| 130779                                                        | 130840 | 130514 | 134545 | CDS | product | transcriptional regulator | ICP4  | 130779-130840 | 10:07:02 |
| GGAGATCGGCGAGGACGCCGGCGCCAGGGACGCGGGGGCGCCGAGGACGCGGACGTCGCGG |        |        |        |     |         |                           |       |               |          |
| 130851                                                        | 130882 | 130514 | 134545 | CDS | product | transcriptional regulator | ICP4  | 130851-130882 | 8:05:02  |

|                                                                           |               |                     |
|---------------------------------------------------------------------------|---------------|---------------------|
| GGCCGAGGGGGCGGAGGGCGCGGAGGACGCGG                                          |               |                     |
| 130914 130966 130514 134545 CDS product transcriptional regulator ICP4    | 130914-130966 | 12:09:03            |
| GGTCGCGGTGGAGGCGGCCGCGCGGGGCGGAGGCGGCCGCGGCCGAAGCGG                       |               |                     |
| 130952 130992 130514 134545 CDS product transcriptional regulator ICP4    | 130952-130992 | 7:04:01             |
| CCGCGGCCGAAGCGGCCGTCATAGCCGCCCATCGAAGCC                                   |               |                     |
| 130995 131005 130514 134545 CDS product transcriptional regulator ICP4    | 130995-131005 | 4:01:01 GGCGGGGGCGG |
| 131016 131092 130514 134545 CDS product transcriptional regulator ICP4    | 131016-131092 | 13:10:03            |
| GGCCGAAGCGGGACTGAGGCGGGGGCGGCGGTGCCCTCGGGGCCAGGACCGAGCGCGGACGTTGGGCCCGAGG |               |                     |
| 131051 131073 130514 134545 CDS product transcriptional regulator ICP4    | 131051-131073 | 4:01:01             |
| CCCTCGGGGCCAGGACCGAGGCC                                                   |               |                     |
| 131107 131131 130514 134545 CDS product transcriptional regulator ICP4    | 131107-131131 | 4:01:01             |
| GGGTCCGAGGACAGCGGGCCCGAGG                                                 |               |                     |
| 131146 131181 130514 134545 CDS product transcriptional regulator ICP4    | 131146-131181 | 7:04:01             |
| GGGCCCCGAGGACGATGGGGGCGAGGCCCGGGAGGGG                                     |               |                     |
| 131202 131238 130514 134545 CDS product transcriptional regulator ICP4    | 131202-131238 | 7:04:01             |
| GGCCGAGGCCGAGGCTGAGGCCGGGACTGGGGCCGGG                                     |               |                     |
| 131234 131258 130514 134545 CDS product transcriptional regulator ICP4    | 131234-131258 | 4:01:01             |
| CCGGGACCAGAACCAAGCGGCCCC                                                  |               |                     |
| 131265 131282 130514 134545 CDS product transcriptional regulator ICP4    | 131265-131282 | 4:01:01             |
| GGCGGGCGCCGGGCCCCG                                                        |               |                     |
| 131273 131327 130514 134545 CDS product transcriptional regulator ICP4    | 131273-131327 | 10:07:02            |
| CCGGGCCCGGCGCCCCGCGGGCCGCGCCCCGGCCCCGGCGCCCTCGCCCGC                       |               |                     |
| 131338 131356 130514 134545 CDS product transcriptional regulator ICP4    | 131338-131356 | 5:02:01             |

|                               |        |        |        |                                            |               |         |                 |
|-------------------------------|--------|--------|--------|--------------------------------------------|---------------|---------|-----------------|
| CCCCCCCCCGCGGCGGCC            |        |        |        |                                            |               |         |                 |
| 131449                        | 131465 | 130514 | 134545 | CDS product transcriptional regulator ICP4 | 131449-131465 | 4:01:01 |                 |
| GGCGAGCGGTGGCCCGG             |        |        |        |                                            |               |         |                 |
| 131473                        | 131488 | 130514 | 134545 | CDS product transcriptional regulator ICP4 | 131473-131488 | 5:02:01 | CCGCCGCCGCCGGCC |
| 131571                        | 131590 | 130514 | 134545 | CDS product transcriptional regulator ICP4 | 131571-131590 | 4:01:01 |                 |
| GGCGGCCGCGGGCCCGCGG           |        |        |        |                                            |               |         |                 |
| 131604                        | 131622 | 130514 | 134545 | CDS product transcriptional regulator ICP4 | 131604-131622 | 4:01:01 |                 |
| GGAGATGGGGACGCGGGG            |        |        |        |                                            |               |         |                 |
| 131634                        | 131650 | 130514 | 134545 | CDS product transcriptional regulator ICP4 | 131634-131650 | 4:01:01 |                 |
| GGCGCTGGTGGACCTGG             |        |        |        |                                            |               |         |                 |
| 131858                        | 131878 | 130514 | 134545 | CDS product transcriptional regulator ICP4 | 131858-131878 | 4:01:01 |                 |
| CCTGCGTGGCCATGAGCCGCC         |        |        |        |                                            |               |         |                 |
| 131933                        | 131961 | 130514 | 134545 | CDS product transcriptional regulator ICP4 | 131933-131961 | 6:03:01 |                 |
| CCCCATGGCCTACCCGGAGGCCGCGCC   |        |        |        |                                            |               |         |                 |
| 131940                        | 131972 | 130514 | 134545 | CDS product transcriptional regulator ICP4 | 131940-131972 | 7:04:01 |                 |
| GGCCTACCCGGAGCCGCGCGCGGCAGCGG |        |        |        |                                            |               |         |                 |
| 132025                        | 132041 | 130514 | 134545 | CDS product transcriptional regulator ICP4 | 132025-132041 | 4:01:01 |                 |
| CCGGCGCCCTGCCGCC              |        |        |        |                                            |               |         |                 |
| 132042                        | 132061 | 130514 | 134545 | CDS product transcriptional regulator ICP4 | 132042-132061 | 4:01:01 |                 |
| GGCGAGCACGGCGGGCGG            |        |        |        |                                            |               |         |                 |
| 132090                        | 132109 | 130514 | 134545 | CDS product transcriptional regulator ICP4 | 132090-132109 | 4:01:01 |                 |
| CCGCTGCGCCGTCGCCTGCC          |        |        |        |                                            |               |         |                 |
| 132114                        | 132127 | 130514 | 134545 | CDS product transcriptional regulator ICP4 | 132114-132127 | 4:01:01 | GGCGCTGGAGGCGG  |

|                                                                                                                                |        |        |        |                                            |               |          |                |
|--------------------------------------------------------------------------------------------------------------------------------|--------|--------|--------|--------------------------------------------|---------------|----------|----------------|
| 132128                                                                                                                         | 132158 | 130514 | 134545 | CDS product transcriptional regulator ICP4 | 132128-132158 | 7:04:01  |                |
| CCCGCCGCGCCGCCGCGCCGCGGGCTCCC                                                                                                  |        |        |        |                                            |               |          |                |
| 132142                                                                                                                         | 132199 | 130514 | 134545 | CDS product transcriptional regulator ICP4 | 132142-132199 | 9:06:02  |                |
| GGCGCCGCGGGCTCCCGGTGCTCTCGGCCGCGCGGGCCGCGCCTGCCGCGCGG                                                                          |        |        |        |                                            |               |          |                |
| 132180                                                                                                                         | 132209 | 130514 | 134545 | CDS product transcriptional regulator ICP4 | 132180-132209 | 6:03:01  |                |
| CCGCGGCCTGCCGGCCGCGCCTGCGCGCC                                                                                                  |        |        |        |                                            |               |          |                |
| 132210                                                                                                                         | 132232 | 130514 | 134545 | CDS product transcriptional regulator ICP4 | 132210-132232 | 4:01:01  |                |
| GGACGCGCTGGCGGCGACCCGG                                                                                                         |        |        |        |                                            |               |          |                |
| 132345                                                                                                                         | 132376 | 130514 | 134545 | CDS product transcriptional regulator ICP4 | 132345-132376 | 7:04:01  |                |
| GGAGGCGCCGCGCTGGCGGCGGACCGTGG                                                                                                  |        |        |        |                                            |               |          |                |
| 132459                                                                                                                         | 132484 | 130514 | 134545 | CDS product transcriptional regulator ICP4 | 132459-132484 | 7:04:01  |                |
| GGCGGAGGTGCCGCGCGGCTGGCGG                                                                                                      |        |        |        |                                            |               |          |                |
| 132495                                                                                                                         | 132530 | 130514 | 134545 | CDS product transcriptional regulator ICP4 | 132495-132530 | 8:05:02  |                |
| GGCCCTGGAGGCCGCCGGCGGGGCGCCGGCGCCGG                                                                                            |        |        |        |                                            |               |          |                |
| 132521                                                                                                                         | 132554 | 130514 | 134545 | CDS product transcriptional regulator ICP4 | 132521-132554 | 7:04:01  |                |
| CCGGCGCCGGCGCCCGCGCCGGCGGGGGCC                                                                                                 |        |        |        |                                            |               |          |                |
| 132543                                                                                                                         | 132749 | 130514 | 134545 | CDS product transcriptional regulator ICP4 | 132543-132749 | 44:41:11 |                |
| GGGCCGGGGCCGGTGGAAGTGGAGGTGGAGGACATGAGGGCCGGGCGCCGCGGGCGGACCCGGAGGACGGGTCCGAGGCGGAGGACGGGGAGGACGGGGAGGACGAAGAGGCGGAAGAGGAGGAAG |        |        |        |                                            |               |          |                |
| AGGAGGAAAAGGAGGAAGAGGAGGAAGAGGAGGAAGAGGAGGAAGAGGAGGAAGAGGGCCGCCCGGCCGGCGCGG                                                    |        |        |        |                                            |               |          |                |
| 132759                                                                                                                         | 132883 | 130514 | 134545 | CDS product transcriptional regulator ICP4 | 132759-132883 | 26:23:06 |                |
| GGGTCCGAGGGAAGGAAGAAGGGCCGAGGAGGAGGAGGAGGAGGAGGAGGAAGAAGGGGACGGGGACGGGCGAGGCGGCGGCCCTGCCGGCCCGCGGGGGCCCTCGGGGAGG               |        |        |        |                                            |               |          |                |
| 132848                                                                                                                         | 132861 | 130514 | 134545 | CDS product transcriptional regulator ICP4 | 132848-132861 | 4:01:01  | CCCTGCCGGCCGCC |
| 132914                                                                                                                         | 132938 | 130514 | 134545 | CDS product transcriptional regulator ICP4 | 132914-132938 | 6:03:01  |                |

|                                |        |        |        |                                            |               |         |                 |
|--------------------------------|--------|--------|--------|--------------------------------------------|---------------|---------|-----------------|
| CCGCCGCCGCCGACGCGCGCGGCC       |        |        |        |                                            |               |         |                 |
| 132930                         | 132949 | 130514 | 134545 | CDS product transcriptional regulator ICP4 | 132930-132949 | 5:02:01 |                 |
| GGCCGGGCCGCGCGCGCGG            |        |        |        |                                            |               |         |                 |
| 132952                         | 132967 | 130514 | 134545 | CDS product transcriptional regulator ICP4 | 132952-132967 | 4:01:01 | CCGCCGCTGCCGCCC |
| 132979                         | 133005 | 130514 | 134545 | CDS product transcriptional regulator ICP4 | 132979-133005 | 6:03:01 |                 |
| CCCATGCCGCCCGCGCGCCCCGCC       |        |        |        |                                            |               |         |                 |
| 133017                         | 133032 | 130514 | 134545 | CDS product transcriptional regulator ICP4 | 133017-133032 | 4:01:01 | CCGCCGCTGCCGCCC |
| 133041                         | 133062 | 130514 | 134545 | CDS product transcriptional regulator ICP4 | 133041-133062 | 4:01:01 |                 |
| CCACACGCCCGCGCCCCAGCGCC        |        |        |        |                                            |               |         |                 |
| 133092                         | 133111 | 130514 | 134545 | CDS product transcriptional regulator ICP4 | 133092-133111 | 4:01:01 |                 |
| GGTCGCGCGCGGCTCGCGG            |        |        |        |                                            |               |         |                 |
| 133113                         | 133142 | 130514 | 134545 | CDS product transcriptional regulator ICP4 | 133113-133142 | 5:02:01 |                 |
| CCACCCGCTCTTCCCCGAGCCCTGGCGCCC |        |        |        |                                            |               |         |                 |
| 133184                         | 133203 | 130514 | 134545 | CDS product transcriptional regulator ICP4 | 133184-133203 | 4:01:01 |                 |
| CCCGCCGCCGCGCGGGCCCC           |        |        |        |                                            |               |         |                 |
| 133229                         | 133245 | 130514 | 134545 | CDS product transcriptional regulator ICP4 | 133229-133245 | 4:01:01 |                 |
| GGCGGCGCGTGGCCTGG              |        |        |        |                                            |               |         |                 |
| 133306                         | 133321 | 130514 | 134545 | CDS product transcriptional regulator ICP4 | 133306-133321 | 4:01:01 | GGGAGGCGCTGGCGG |
| 133344                         | 133369 | 130514 | 134545 | CDS product transcriptional regulator ICP4 | 133344-133369 | 5:02:01 |                 |
| CCGGCGGCCCGAGTGCCGCCGCGCC      |        |        |        |                                            |               |         |                 |
| 133439                         | 133465 | 130514 | 134545 | CDS product transcriptional regulator ICP4 | 133439-133465 | 5:02:01 |                 |
| GGGCCGGGCGCTGGACGGGCGCGCCG     |        |        |        |                                            |               |         |                 |
| 133553                         | 133575 | 130514 | 134545 | CDS product transcriptional regulator ICP4 | 133553-133575 | 6:03:01 |                 |

|                                                                         |        |        |        |                                            |               |          |                |
|-------------------------------------------------------------------------|--------|--------|--------|--------------------------------------------|---------------|----------|----------------|
| GGCTGGCCGCGGCGCGGCGGCGG                                                 |        |        |        |                                            |               |          |                |
| 133621                                                                  | 133639 | 130514 | 134545 | CDS product transcriptional regulator ICP4 | 133621-133639 | 4:01:01  |                |
| GGCCCCGCGCGTCGGGCAGG                                                    |        |        |        |                                            |               |          |                |
| 133847                                                                  | 133886 | 130514 | 134545 | CDS product transcriptional regulator ICP4 | 133847-133886 | 7:04:01  |                |
| CCACGCGCCTGGGCCCCGCGCACCGCGGTGCCCGTGCCGCC                               |        |        |        |                                            |               |          |                |
| 133924                                                                  | 133996 | 130514 | 134545 | CDS product transcriptional regulator ICP4 | 133924-133996 | 12:09:03 |                |
| GGGCGCAAGGACATGGCCGCGCAGGGCGCGGCTGGGGCTCGGGGAGCCGGACTTCGTGGAGGGCGAGGCGG |        |        |        |                                            |               |          |                |
| 133997                                                                  | 134017 | 130514 | 134545 | CDS product transcriptional regulator ICP4 | 133997-134017 | 6:03:01  |                |
| CCAGCCACCGCGCCGCCAAC                                                    |        |        |        |                                            |               |          |                |
| 134035                                                                  | 134058 | 130514 | 134545 | CDS product transcriptional regulator ICP4 | 134035-134058 | 4:01:01  |                |
| CCGCTGCGGCGCGGTGTACCTGGCC                                               |        |        |        |                                            |               |          |                |
| 134042                                                                  | 134067 | 130514 | 134545 | CDS product transcriptional regulator ICP4 | 134042-134067 | 5:02:01  |                |
| GGCCGGTGTACCTGGCCTGCGGGCGG                                              |        |        |        |                                            |               |          |                |
| 134100                                                                  | 134113 | 130514 | 134545 | CDS product transcriptional regulator ICP4 | 134100-134113 | 4:01:01  | GGCCGCGGCGGTGG |
| 134126                                                                  | 134159 | 130514 | 134545 | CDS product transcriptional regulator ICP4 | 134126-134159 | 6:03:01  |                |
| CCGCGCTGCCGAGCCGCGCGCCGAGGCGCCGCC                                       |        |        |        |                                            |               |          |                |
| 134163                                                                  | 134182 | 130514 | 134545 | CDS product transcriptional regulator ICP4 | 134163-134182 | 5:02:01  |                |
| GGTGCTGGAGGCCGCGGCGG                                                    |        |        |        |                                            |               |          |                |
| 134185                                                                  | 134205 | 130514 | 134545 | CDS product transcriptional regulator ICP4 | 134185-134205 | 4:01:01  |                |
| CCGCCCCGCGCGCGCGCGCCC                                                   |        |        |        |                                            |               |          |                |
| 134193                                                                  | 134239 | 130514 | 134545 | CDS product transcriptional regulator ICP4 | 134193-134239 | 8:05:02  |                |
| GGCCGCGCGCGCCGCGGTGGACTGGGACGCGGACCAGGGCCCCGCGG                         |        |        |        |                                            |               |          |                |
| 134268                                                                  | 134284 | 130514 | 134545 | CDS product transcriptional regulator ICP4 | 134268-134284 | 5:02:01  |                |

|        |        |        |        |                                                                                                    |               |         |
|--------|--------|--------|--------|----------------------------------------------------------------------------------------------------|---------------|---------|
| 134312 | 134330 | 130514 | 134545 | CDS product transcriptional regulator ICP4<br>CCCCGCCGGCCCGGTGCC                                   | 134312-134330 | 4:01:01 |
| 134346 | 134412 | 130514 | 134545 | CDS product transcriptional regulator ICP4<br>GGGCGCGGGCTCGGGCTTCCCGCGCCGGCGGGCGGCCGGCGGCCCGCGCGGG | 134346-134412 | 14:11:0 |
| 134438 | 134472 | 130514 | 134545 | CDS product transcriptional regulator ICP4<br>CCTCCTCCTCCTCCTCGTCCTCGTCCTCGTCC                     | 134438-134472 | 9:06:02 |
| 134508 | 134533 | 130514 | 134545 | CDS product transcriptional regulator ICP4<br>GGCCGCGCCGCCGCGGGCGGGCCGG                            | 134508-134533 | 6:03:01 |

|      |      |      |      |                                                                  |                              |         |                     |
|------|------|------|------|------------------------------------------------------------------|------------------------------|---------|---------------------|
| 960  | 973  | 784  | 1329 | CDS product membrane protein UL56A                               | 960-973                      | 4:01:01 | CCTCCCACACCCCC      |
| 994  | 1012 | 784  | 1329 | CDS product membrane protein UL56A                               | 994-1012                     | 5:02:01 | CCATTGCCTCCAATCCACC |
| 1701 | 1728 | 1571 | 2452 | CDS product multifunctional expression regulator-related protein |                              |         | 1701-1728           |
|      |      |      |      | 5:02:01                                                          | CCCCCAACACGCCGCGCTCACATGCCCC |         |                     |

|                           |       |       |       |                                                   |             |         |                            |
|---------------------------|-------|-------|-------|---------------------------------------------------|-------------|---------|----------------------------|
| 4016                      | 4033  | 3946  | 4497  | CDS product nuclear protein UL55                  | 4016-4033   | 4:01:01 | CCTCCGCTGCACCTGCCC         |
| 7161                      | 7178  | 6288  | 7301  | CDS product envelope glycoprotein K               | 7161-7178   | 4:01:01 | CCTCCCTGTACCGGAGCC         |
| 8167                      | 8180  | 7306  | 10551 | CDS product helicase-primase primase subunit      | 8167-8180   | 4:01:01 | GGAGGCGGTACTGG             |
| 10629                     | 10655 | 10562 | 11257 | CDS product tegument protein UL51                 | 10629-10655 | 4:01:01 | GGTTCGTGAAAAACCGGTCCATCTGG |
| 11081                     | 11102 | 10562 | 11257 | CDS product tegument protein UL51                 | 11081-11102 | 4:01:01 | CCATGCTAACCCCTGCGCCTCC     |
| 14210                     | 14235 | 14182 | 15402 | CDS product transactivating tegument protein VP16 | 14210-14235 | 4:01:01 |                            |
| GGAACAGTGGCATAATAGGCATTGG |       |       |       |                                                   |             |         |                            |
| 16140                     | 16168 | 15721 | 17649 | CDS product tegument protein VP13/14              | 16140-16168 | 5:02:01 |                            |

[illegible]



|                                    |       |       |       |                                                 |                                               |
|------------------------------------|-------|-------|-------|-------------------------------------------------|-----------------------------------------------|
| 44672                              | 44685 | 44597 | 45241 | CDS product nuclear egress membrane protein     | 44672-44685 4:01:01 GGTGGGGGAAATGG            |
| 49045                              | 49065 | 48395 | 51913 | CDS product DNA polymerase catalytic subunit    | 49045-49065 4:01:01                           |
| GGGAGGAAGCGGTTTTCCTGG              |       |       |       |                                                 |                                               |
| 50467                              | 50486 | 48395 | 51913 | CDS product DNA polymerase catalytic subunit    | 50467-50486 4:01:01                           |
| CCCACCTTTCCCAACATCCC               |       |       |       |                                                 |                                               |
| 53280                              | 53299 | 52099 | 55683 | CDS product single-stranded DNA-binding protein | 53280-53299 4:01:01                           |
| GGTAAAGATGGGGTCCGGG                |       |       |       |                                                 |                                               |
| 53868                              | 53886 | 52099 | 55683 | CDS product single-stranded DNA-binding protein | 53868-53886 4:01:01                           |
| CCGTTTTCTCCGAGGGCC                 |       |       |       |                                                 |                                               |
| 54835                              | 54860 | 52099 | 55683 | CDS product single-stranded DNA-binding protein | 54835-54860 4:01:01                           |
| CCAAGCGACCACATAATCCATCTCC          |       |       |       |                                                 |                                               |
| 55086                              | 55111 | 52099 | 55683 | CDS product single-stranded DNA-binding protein | 55086-55111 5:02:01                           |
| GGAAATTGGAGTGGCCTTAACGGTGG         |       |       |       |                                                 |                                               |
| 55569                              | 55585 | 52099 | 55683 | CDS product single-stranded DNA-binding protein | 55569-55585 4:01:01                           |
| CCACCTTCATACCAACC                  |       |       |       |                                                 |                                               |
| 57121                              | 57143 | 55770 | 58052 | CDS product DNA packaging terminase subunit 2   | 57121-57143 4:01:01                           |
| GGCATCCGAGGTTTATGGATGGG            |       |       |       |                                                 |                                               |
| 60136                              | 60169 | 57911 | 60661 | CDS product envelope glycoprotein B             | 60136-60169 6:03:01                           |
| GGTTTGGGTACTGCGGGACAGGCCGTTGGTCAGG |       |       |       |                                                 |                                               |
| 60241                              | 60265 | 57911 | 60661 | CDS product envelope glycoprotein B             | 60241-60265 4:01:01 GGTGCATTGGCTGTTGGACTGTTGG |
| 62385                              | 62410 | 61291 | 63057 | CDS product capsid maturation protease          | 62385-62410 5:02:01                           |
| CCCCGAAATACCGCCTCCATTCTCC          |       |       |       |                                                 |                                               |
| 62932                              | 62956 | 61291 | 63057 | CDS product capsid maturation protease          | 62932-62956 5:02:01                           |

GGTAAGGGGTTTTAGGCGTAAGG

|       |       |       |       |                                                 |
|-------|-------|-------|-------|-------------------------------------------------|
| 63859 | 63873 | 63088 | 64827 | CDS product DNA packaging tegument protein UL25 |
| 64984 | 65003 | 64891 | 65637 | CDS product nuclear protein UL24                |
| 66480 | 66505 | 65663 | 66676 | CDS product thymidine kinase                    |
| 67396 | 67423 | 66849 | 69407 | CDS product envelope glycoprotein H             |
| 67518 | 67539 | 66849 | 69407 | CDS product envelope glycoprotein H             |
| 67754 | 67776 | 66849 | 69407 | CDS product envelope glycoprotein H             |
| 69729 | 69753 | 69458 | 71059 | CDS product tegument protein UL21               |
| 70889 | 70917 | 69458 | 71059 | CDS product tegument protein UL21               |

CCGGGTCCCACGCCACGTACCACATGTCC

|       |       |       |       |                                   |
|-------|-------|-------|-------|-----------------------------------|
| 73180 | 73199 | 72198 | 76376 | CDS product major capsid protein  |
| 73506 | 73527 | 72198 | 76376 | CDS product major capsid protein  |
| 73907 | 73926 | 72198 | 76376 | CDS product major capsid protein  |
| 81047 | 81063 | 80862 | 81944 | CDS product tegument protein UL16 |
| 81406 | 81422 | 80862 | 81944 | CDS product tegument protein UL16 |
| 81645 | 81661 | 80862 | 81944 | CDS product tegument protein UL16 |
| 83651 | 83681 | 83181 | 83780 | CDS product tegument protein UL14 |

CCCTCCCCGATTCCCCATGCTCCACCAACCC

|       |       |       |       |                                           |
|-------|-------|-------|-------|-------------------------------------------|
| 85964 | 85987 | 85120 | 86649 | CDS product deoxyribonuclease             |
| 86319 | 86343 | 85120 | 86649 | CDS product deoxyribonuclease             |
| 86669 | 86688 | 86649 | 86897 | CDS product myristylated tegument protein |
| 87988 | 88027 | 86982 | 88274 | CDS product envelope glycoprotein M       |

CCGGTGCCCCATATCCTTTATTTCGGCCCCACACCCCC

63859-63873 4:01:01 GGAGCCGGAGGTAGG

64984-65003 4:01:01 GGATTTGGATTTAAGGTTGG

66480-66505 5:02:01 GGATTTATGGAAATGGGGTATGGGGG

67396-67423 5:02:01 CCTGTTACCAACAAGACCCACCGCACCC

67518-67539 4:01:01 CCACCTTAAAAACCCACGTTCC

67754-67776 5:02:01 CCCCTGGACCCGACCCGGGACC

69729-69753 4:01:01 CCGGAACACCCAATAATCCAATTCC

70889-70917 5:02:01

73180-73199 4:01:01 GGCTTTGGTTATGGGTAAGG

73506-73527 4:01:01 CCCCTCCTGATAAACCGGATCC

73907-73926 4:01:01 CCAGGTCCCGAAAGACCTCC

81047-81063 4:01:01 CCATTTATTCTCCGCC

81406-81422 4:01:01 GGGAGTATGGTGGTCGG

81645-81661 4:01:01 GGAGAAAGCCGGGCGG

83651-83681 6:03:01

85964-85987 4:01:01 CCGTGCCAAATACCTATTTACCCC

86319-86343 5:02:01 CCCGTTTCGCCAATCCACGCCACC

86669-86688 4:01:01 GGCCGAGGAGGAATTTGTGG

87988-88027 7:04:01

|                                   |        |        |        |                                                     |               |         |
|-----------------------------------|--------|--------|--------|-----------------------------------------------------|---------------|---------|
| 88432                             | 88454  | 88310  | 90760  | CDS product DNA replication origin-binding helicase | 88432-88454   | 4:01:01 |
| CCTAATGATCCACAGTTCCGTCC           |        |        |        |                                                     |               |         |
| 90585                             | 90607  | 88310  | 90760  | CDS product DNA replication origin-binding helicase | 90585-90607   | 4:01:01 |
| GGAAGCACGGTTTATGGTTGCGG           |        |        |        |                                                     |               |         |
| 91971                             | 91996  | 90877  | 93174  | CDS product helicase-primase subunit                | 91971-91996   | 5:02:01 |
| CCGTGGACCATTTCATCCACCCTTACC       |        |        |        |                                                     |               |         |
| 92966                             | 92986  | 90877  | 93174  | CDS product helicase-primase subunit                | 92966-92986   | 4:01:01 |
| CCCCAGGGCCATCCCAAAGCC             |        |        |        |                                                     |               |         |
| 93453                             | 93478  | 93243  | 94157  | CDS product tegument protein UL7                    | 93453-93478   | 5:02:01 |
| GGCGGTGAGGATTTATTGGTGAATGG        |        |        |        |                                                     |               |         |
| 94276                             | 94291  | 94048  | 96255  | CDS product capsid portal protein                   | 94276-94291   | 4:01:01 |
| CCCCGCCGTTCCAACC                  |        |        |        |                                                     |               |         |
| 100493                            | 100511 | 100404 | 101306 | CDS product uracil DNA glycosylase                  | 100493-100511 | 4:01:01 |
| GGAGAGAGGAGAGGGGTGG               |        |        |        |                                                     |               |         |
| 100744                            | 100765 | 100404 | 101306 | CDS product uracil DNA glycosylase                  | 100744-100765 | 4:01:01 |
| GGGTCGGTAAAGGCAAGTGGGG            |        |        |        |                                                     |               |         |
| 102960                            | 102981 | 102915 | 104426 | CDS product ubiquitin E3 ligase ICP0                | 102960-102981 | 4:01:01 |
| CCCTGTTTCTACCGCGTCTCC             |        |        |        |                                                     |               |         |
| 103727                            | 103747 | 102915 | 104426 | CDS product ubiquitin E3 ligase ICP0                | 103727-103747 | 4:01:01 |
| CCCATATCCATTTGCCTGTCC             |        |        |        |                                                     |               |         |
| 103776                            | 103798 | 102915 | 104426 | CDS product ubiquitin E3 ligase ICP0                | 103776-103798 | 4:01:01 |
| GGTGGTTCCGTTGGAACACCAGG           |        |        |        |                                                     |               |         |
| 104262                            | 104294 | 102915 | 104426 | CDS product ubiquitin E3 ligase ICP0                | 104262-104294 | 5:02:01 |
| GGACACTGGGCGCTTGTGGAAGTCCAGGTTTGG |        |        |        |                                                     |               |         |
| 105826                            | 105845 | 105265 | 109104 | CDS product transcriptional regulator ICP4          | 105826-105845 | 4:01:01 |
| GGCACGTCGGACGGTCTCGG              |        |        |        |                                                     |               |         |
| 105847                            | 105870 | 105265 | 109104 | CDS product transcriptional regulator ICP4          | 105847-105870 | 4:01:01 |
| CCCGCGCTGCCGGGCCTGCGGCCC          |        |        |        |                                                     |               |         |

|                                         |        |        |        |                                            |               |         |                  |
|-----------------------------------------|--------|--------|--------|--------------------------------------------|---------------|---------|------------------|
| 105858                                  | 105896 | 105265 | 109104 | CDS product transcriptional regulator ICP4 | 105858-105896 | 6:03:01 |                  |
| GGGCCTGCGGCCCTCGGGGAGGTAGACGGGTCGCAGGGG |        |        |        |                                            |               |         |                  |
| 105956                                  | 105984 | 105265 | 109104 | CDS product transcriptional regulator ICP4 | 105956-105984 | 7:04:01 |                  |
| CCGCCGCCCCACGGCCAATCCCTGCGCC            |        |        |        |                                            |               |         |                  |
| 106211                                  | 106230 | 105265 | 109104 | CDS product transcriptional regulator ICP4 | 106211-106230 | 4:01:01 |                  |
| CCGCTCTTGCCAGACCGGCC                    |        |        |        |                                            |               |         |                  |
| 106370                                  | 106390 | 105265 | 109104 | CDS product transcriptional regulator ICP4 | 106370-106390 | 5:02:01 |                  |
| GGCCGGCGGAGGCGAGCCTGG                   |        |        |        |                                            |               |         |                  |
| 106483                                  | 106501 | 105265 | 109104 | CDS product transcriptional regulator ICP4 | 106483-106501 | 4:01:01 |                  |
| CCGCTCCAGTTACCGGCCC                     |        |        |        |                                            |               |         |                  |
| 106759                                  | 106776 | 105265 | 109104 | CDS product transcriptional regulator ICP4 | 106759-106776 | 4:01:01 |                  |
| CCGCCGTGTCCCCTGGCC                      |        |        |        |                                            |               |         |                  |
| 106806                                  | 106827 | 105265 | 109104 | CDS product transcriptional regulator ICP4 | 106806-106827 | 5:02:01 |                  |
| CCTTAACACCGCGCCGACGCC                   |        |        |        |                                            |               |         |                  |
| 107104                                  | 107127 | 105265 | 109104 | CDS product transcriptional regulator ICP4 | 107104-107127 | 5:02:01 |                  |
| CCCGCCAGTCCGCTCCTCTCACCC                |        |        |        |                                            |               |         |                  |
| 107189                                  | 107209 | 105265 | 109104 | CDS product transcriptional regulator ICP4 | 107189-107209 | 4:01:01 |                  |
| CCGGGGCCGCTACCGCGGCC                    |        |        |        |                                            |               |         |                  |
| 107245                                  | 107260 | 105265 | 109104 | CDS product transcriptional regulator ICP4 | 107245-107260 | 4:01:01 | GGGTAGGCCATGGTGG |
| 107331                                  | 107353 | 105265 | 109104 | CDS product transcriptional regulator ICP4 | 107331-107353 | 6:03:01 |                  |
| GGCGGCGGCGCGTGTGGAAGGG                  |        |        |        |                                            |               |         |                  |
| 107354                                  | 107376 | 105265 | 109104 | CDS product transcriptional regulator ICP4 | 107354-107376 | 4:01:01 |                  |
| CCCACAGAGCCTCTCCACGTGCC                 |        |        |        |                                            |               |         |                  |

|                                                       |        |        |        |                                                 |               |         |                     |
|-------------------------------------------------------|--------|--------|--------|-------------------------------------------------|---------------|---------|---------------------|
| 107681                                                | 107703 | 105265 | 109104 | CDS product transcriptional regulator ICP4      | 107681-107703 | 5:02:01 |                     |
| CCCCCGACGGTCCAAACCTCACC                               |        |        |        |                                                 |               |         |                     |
| 107969                                                | 108012 | 105265 | 109104 | CDS product transcriptional regulator ICP4      | 107969-108012 | 7:04:01 |                     |
| CCTCTTCCTTGCCCGTACCCGTCGCCTGCTTGCCCGTGTGTCC           |        |        |        |                                                 |               |         |                     |
| 108180                                                | 108234 | 105265 | 109104 | CDS product transcriptional regulator ICP4      | 108180-108234 | 9:06:02 |                     |
| CCTGGGTCCGGGTTGCCCCCGGTGCGCCACAATCCCCGACCACACCGGTGTCC |        |        |        |                                                 |               |         |                     |
| 108419                                                | 108434 | 105265 | 109104 | CDS product transcriptional regulator ICP4      | 108419-108434 | 4:01:01 | CCGCCGATGTCTTCC     |
| 108547                                                | 108587 | 105265 | 109104 | CDS product transcriptional regulator ICP4      | 108547-108587 | 7:04:01 |                     |
| GGGGACCTTGGTGTGCGTGGATCGGTAGGTTCTGGGAAGG              |        |        |        |                                                 |               |         |                     |
| 108607                                                | 108635 | 105265 | 109104 | CDS product transcriptional regulator ICP4      | 108607-108635 | 4:01:01 |                     |
| GGGGACCTCGGGGCCGTGGGTGCTTGG                           |        |        |        |                                                 |               |         |                     |
| 108770                                                | 108786 | 105265 | 109104 | CDS product transcriptional regulator ICP4      | 108770-108786 | 4:01:01 |                     |
| CCGGGGCCAAATCCACC                                     |        |        |        |                                                 |               |         |                     |
| 110558                                                | 110579 | 110490 | 111275 | CDS product regulatory protein ICP22            | 110558-110579 | 4:01:01 |                     |
| GGAGCCCGGGAGTACGGCTCGG                                |        |        |        |                                                 |               |         |                     |
| 110703                                                | 110726 | 110490 | 111275 | CDS product regulatory protein ICP22            | 110703-110726 | 4:01:01 |                     |
| GGGCATCGGGACGGGTTACAAGG                               |        |        |        |                                                 |               |         |                     |
| 111512                                                | 111542 | 111497 | 112060 | CDS product virion protein US10                 | 111512-111542 | 5:02:01 |                     |
| CCGAACCCGTCAACCCGGGTTCTGCTACCC                        |        |        |        |                                                 |               |         |                     |
| 111755                                                | 111772 | 111497 | 112060 | CDS product virion protein US10                 | 111755-111772 | 4:01:01 | CCTTCCCTGCCGTGCGCC  |
| 114041                                                | 114060 | 112890 | 114071 | CDS product serine/threonine protein kinase US3 | 114041-114060 | 4:01:01 |                     |
| CCGGACCCATATCCCAACCC                                  |        |        |        |                                                 |               |         |                     |
| 116871                                                | 116890 | 115583 | 117397 | CDS product envelope glycoprotein E             | 116871-116890 | 4:01:01 | GGAACCGGGTCCGGATTGG |

|                                                                        |                                         |
|------------------------------------------------------------------------|-----------------------------------------|
| 117340 117370 115583 117397 CDS product envelope glycoprotein E        | 117340-117370 6:03:01                   |
| GGCGCGGAGTGCGGCGGGTCTGGATACACGG                                        |                                         |
| 117777 117794 117491 118054 CDS product virion protein US10            | 117777-117794 4:01:01 GGCGCACGGCAGGAAGG |
| 118007 118037 117491 118054 CDS product virion protein US10            | 118007-118037 5:02:01                   |
| GGGTAGCAGGAACCCGGGTTGACGGGTTTCGG                                       |                                         |
| 118823 118846 118276 119061 CDS product regulatory protein ICP22       | 118823-118846 4:01:01                   |
| CCCTTGTAACCCGTCCCGATGCCC                                               |                                         |
| 118970 118991 118276 119061 CDS product regulatory protein ICP22       | 118970-118991 4:01:01                   |
| CCGAGCCGTACTCCCGGGCTCC                                                 |                                         |
| 120763 120779 120447 124286 CDS product transcriptional regulator ICP4 | 120763-120779 4:01:01                   |
| GGTGGATTGGCCCCGG                                                       |                                         |
| 120914 120942 120447 124286 CDS product transcriptional regulator ICP4 | 120914-120942 4:01:01                   |
| CCAAGCGACCCACGGGCCCGAGGTCCCC                                           |                                         |
| 120962 121002 120447 124286 CDS product transcriptional regulator ICP4 | 120962-121002 7:04:01                   |
| CCTTCCCAGAAACCTACCGATCCACGCACACCAAGGTCCCC                              |                                         |
| 121115 121130 120447 124286 CDS product transcriptional regulator ICP4 | 121115-121130 4:01:01 GGAAGGACATCGGCGG  |
| 121315 121369 120447 124286 CDS product transcriptional regulator ICP4 | 121315-121369 9:06:02                   |
| GGACACCGGTGTGGTCGGGGATTGTGGCGCACGCGGGGCGAACCCGGACCCAGG                 |                                         |
| 121537 121580 120447 124286 CDS product transcriptional regulator ICP4 | 121537-121580 7:04:01                   |
| GGACACACGGGACAAGCAGGCGACGGGTACGGGCAAGGAAGAGG                           |                                         |
| 121846 121868 120447 124286 CDS product transcriptional regulator ICP4 | 121846-121868 5:02:01                   |
| GGTGAGGTTTGGACCGTCGGGGG                                                |                                         |
| 122173 122195 120447 124286 CDS product transcriptional regulator ICP4 | 122173-122195 4:01:01                   |

|                                        |        |        |        |                                            |               |         |                  |
|----------------------------------------|--------|--------|--------|--------------------------------------------|---------------|---------|------------------|
| GGCACGTGGAGAGGCTCTGTGGG                |        |        |        |                                            |               |         |                  |
| 122196                                 | 122218 | 120447 | 124286 | CDS product transcriptional regulator ICP4 | 122196-122218 | 6:03:01 |                  |
| CCCTTCCACACGCCGCCGCCG                  |        |        |        |                                            |               |         |                  |
| 122289                                 | 122304 | 120447 | 124286 | CDS product transcriptional regulator ICP4 | 122289-122304 | 4:01:01 | CCACCATGGCCTACCC |
| 122340                                 | 122360 | 120447 | 124286 | CDS product transcriptional regulator ICP4 | 122340-122360 | 4:01:01 |                  |
| GGGCCGCGGTAGCGGCCCGG                   |        |        |        |                                            |               |         |                  |
| 122422                                 | 122445 | 120447 | 124286 | CDS product transcriptional regulator ICP4 | 122422-122445 | 5:02:01 |                  |
| GGGTGAGAGGAGCGGACTGGCGGG               |        |        |        |                                            |               |         |                  |
| 122722                                 | 122743 | 120447 | 124286 | CDS product transcriptional regulator ICP4 | 122722-122743 | 5:02:01 |                  |
| GGCGTGGCGGCCGGTGTTAAGG                 |        |        |        |                                            |               |         |                  |
| 122773                                 | 122790 | 120447 | 124286 | CDS product transcriptional regulator ICP4 | 122773-122790 | 4:01:01 |                  |
| GGCCAGGGGACACGGCGG                     |        |        |        |                                            |               |         |                  |
| 123048                                 | 123066 | 120447 | 124286 | CDS product transcriptional regulator ICP4 | 123048-123066 | 4:01:01 |                  |
| GGGCCGGTAACTGGAGCGG                    |        |        |        |                                            |               |         |                  |
| 123159                                 | 123179 | 120447 | 124286 | CDS product transcriptional regulator ICP4 | 123159-123179 | 5:02:01 |                  |
| CCAGGCTCGCCTCCGCCGGCC                  |        |        |        |                                            |               |         |                  |
| 123319                                 | 123338 | 120447 | 124286 | CDS product transcriptional regulator ICP4 | 123319-123338 | 4:01:01 |                  |
| GGCCGGTCTGGCAAGAGCGG                   |        |        |        |                                            |               |         |                  |
| 123565                                 | 123593 | 120447 | 124286 | CDS product transcriptional regulator ICP4 | 123565-123593 | 7:04:01 |                  |
| GGCGCAGGGATTGGCCGTGGGGGCGGCGG          |        |        |        |                                            |               |         |                  |
| 123653                                 | 123691 | 120447 | 124286 | CDS product transcriptional regulator ICP4 | 123653-123691 | 6:03:01 |                  |
| CCCCTGCGACCCGTCTACCTCCCCGAGGGCCGAGGCCC |        |        |        |                                            |               |         |                  |
| 123679                                 | 123702 | 120447 | 124286 | CDS product transcriptional regulator ICP4 | 123679-123702 | 4:01:01 |                  |

|                                                                        |               |         |                             |
|------------------------------------------------------------------------|---------------|---------|-----------------------------|
| GGGCCGCAGGCCCGGCAGCGCGG                                                |               |         |                             |
| 123704 123723 120447 124286 CDS product transcriptional regulator ICP4 | 123704-123723 | 4:01:01 |                             |
| CCGAGACCGTCCGACGTGCC                                                   |               |         |                             |
| 123799 123818 120447 124286 CDS product transcriptional regulator ICP4 | 123799-123818 | 4:01:01 |                             |
| GGTAGCGGGGAGATCGGTGG                                                   |               |         |                             |
| 123879 123900 120447 124286 CDS product transcriptional regulator ICP4 | 123879-123900 | 4:01:01 |                             |
| GGCCACCGGGTTTCGGGAGCGG                                                 |               |         |                             |
| 123910 123927 120447 124286 CDS product transcriptional regulator ICP4 | 123910-123927 | 5:02:01 |                             |
| GGTGGAGATGGGGGATGG                                                     |               |         |                             |
| 124045 124059 120447 124286 CDS product transcriptional regulator ICP4 | 124045-124059 | 4:01:01 | GGGCGCGGGTGGCGG             |
| 124108 124132 120447 124286 CDS product transcriptional regulator ICP4 | 124108-124132 | 4:01:01 |                             |
| CCGAGACCGCGGCGCCCGTCGCTCC                                              |               |         |                             |
| 124193 124221 120447 124286 CDS product transcriptional regulator ICP4 | 124193-124221 | 5:02:01 |                             |
| GGGGTGTTTAGGACGGGCGCGCACGG                                             |               |         |                             |
| gi 123318702 ref NC_005261.2  Bovine herpesvirus 5, complete genome    |               |         |                             |
| 732 778 598 1335 CDS product myristylated tegument protein CIRC        | 732-778       | 8:05:02 |                             |
| CCCATGTACCACCACATGCGCCGCGGCCGCGGCCACACCACGCC                           |               |         |                             |
| 794 819 598 1335 CDS product myristylated tegument protein CIRC        | 794-819       | 6:03:01 | CCGCGCCTACGCCATCCTGCCCTGCC  |
| 870 896 598 1335 CDS product myristylated tegument protein CIRC        | 870-896       | 6:03:01 | CCCGCCACTGGCCTGCACCGCCTCGCC |
| 1000 1014 598 1335 CDS product myristylated tegument protein CIRC      | 1000-1014     | 4:01:01 | CCACCCCGAGATCC              |
| 1025 1052 598 1335 CDS product myristylated tegument protein CIRC      | 1025-1052     | 6:03:01 |                             |
| CCAGGCGGACCAGGCCTTCCCGCCGCC                                            |               |         |                             |



|      |      |      |      |                                                         |           |          |              |
|------|------|------|------|---------------------------------------------------------|-----------|----------|--------------|
| 1097 | 1152 | 598  | 1335 | CDS product myristylated tegument protein CIRC          | 1097-1152 | 11:08:02 |              |
|      |      |      |      | CCCGCCACCCGCGCCTTCTGCCCCACCAGCTGGCCGAGGGCTCCATCCTGGACC  |           |          |              |
| 1264 | 1295 | 598  | 1335 | CDS product myristylated tegument protein CIRC          | 1264-1295 | 7:04:01  |              |
|      |      |      |      | CCGACACCACGTCCGCCCCAGTCCCGGCACC                         |           |          |              |
| 1959 | 1977 | 1702 | 2913 | CDS product multifunctional expression regulator        | 1959-1977 | 5:02:01  |              |
|      |      |      |      | GGCTGGGCAGGTGGCGAGG                                     |           |          |              |
| 2082 | 2137 | 1702 | 2913 | CDS product multifunctional expression regulator        | 2082-2137 | 9:06:02  |              |
|      |      |      |      | GGCGCCGCGCGTGGCCACGATGGGGTCCTTGGTGCGCAGGGGAGGTTCTTGGCGG |           |          |              |
| 2216 | 2235 | 1702 | 2913 | CDS product multifunctional expression regulator        | 2216-2235 | 4:01:01  |              |
|      |      |      |      | CCCGCAGCGCCCGCGCCGCC                                    |           |          |              |
| 2267 | 2286 | 1702 | 2913 | CDS product multifunctional expression regulator        | 2267-2286 | 4:01:01  |              |
|      |      |      |      | GGTAGAGGTCGCGGCCGTGG                                    |           |          |              |
| 2304 | 2326 | 1702 | 2913 | CDS product multifunctional expression regulator        | 2304-2326 | 5:02:01  |              |
|      |      |      |      | GGTGACGCGGCGGCCCTCGGGG                                  |           |          |              |
| 2331 | 2362 | 1702 | 2913 | CDS product multifunctional expression regulator        | 2331-2362 | 6:03:01  |              |
|      |      |      |      | CCGCTCCGGGCCAAAGTCCAGCACGGCCGCC                         |           |          |              |
| 2456 | 2497 | 1702 | 2913 | CDS product multifunctional expression regulator        | 2456-2497 | 7:04:01  |              |
|      |      |      |      | CCGTGGCCCTCTGCGCCGCCTCGGCCATGCTCCGCGCGAGCC              |           |          |              |
| 2519 | 2530 | 1702 | 2913 | CDS product multifunctional expression regulator        | 2519-2530 | 4:01:01  | GGGCGGAGGCGG |
| 2567 | 2605 | 1702 | 2913 | CDS product multifunctional expression regulator        | 2567-2605 | 9:06:02  |              |
|      |      |      |      | CCGCCTCGCGCTCCGCCCGGGCCGCGAGCCCGCGCC                    |           |          |              |
| 2641 | 2656 | 1702 | 2913 | CDS product multifunctional expression regulator        | 2641-2656 | 4:01:01  |              |
|      |      |      |      | CCTCGCCCGCGCGCC                                         |           |          |              |

|                                                        |      |      |      |                                                  |           |          |                             |
|--------------------------------------------------------|------|------|------|--------------------------------------------------|-----------|----------|-----------------------------|
| 2666                                                   | 2705 | 1702 | 2913 | CDS product multifunctional expression regulator | 2666-2705 | 7:04:01  |                             |
| CCCCCGCGCCAGGGGCGCCCCGGCGCCCCGTCCTCGCC                 |      |      |      |                                                  |           |          |                             |
| 2771                                                   | 2784 | 1702 | 2913 | CDS product multifunctional expression regulator | 2771-2784 | 4:01:01  |                             |
| CCCCTCCACCACC                                          |      |      |      |                                                  |           |          |                             |
| 2797                                                   | 2816 | 1702 | 2913 | CDS product multifunctional expression regulator | 2797-2816 | 4:01:01  |                             |
| GGGGCCCGCGGGGGCGCGGG                                   |      |      |      |                                                  |           |          |                             |
| 2819                                                   | 2835 | 1702 | 2913 | CDS product multifunctional expression regulator | 2819-2835 | 4:01:01  |                             |
| CCTTGTCCTCCCTCC                                        |      |      |      |                                                  |           |          |                             |
| 3274                                                   | 3317 | 3135 | 4130 | CDS product envelope glycoprotein K              | 3274-3317 | 8:05:02  |                             |
| CCTTCCTGATCCCGCTCTCGCCGTCGCCAGCGGCGCCGCCCCC            |      |      |      |                                                  |           |          |                             |
| 3322                                                   | 3341 | 3135 | 4130 | CDS product envelope glycoprotein K              | 3322-3341 | 5:02:01  | GGCGGCGGGGGCTTGCGG          |
| 3368                                                   | 3386 | 3135 | 4130 | CDS product envelope glycoprotein K              | 3368-3386 | 4:01:01  | GGCGAAGCGGCGACGTGG          |
| 3406                                                   | 3433 | 3135 | 4130 | CDS product envelope glycoprotein K              | 3406-3433 | 4:01:01  | GGTACATCGGGTACGCGCCGCGCAGGG |
| 3442                                                   | 3497 | 3135 | 4130 | CDS product envelope glycoprotein K              | 3442-3497 | 11:08:02 |                             |
| CCACGCCGACGCTGCCGGCCGCCGACCCGCGCGCCGAGCCGCGCCAGGCCCTCC |      |      |      |                                                  |           |          |                             |
| 3544                                                   | 3567 | 3135 | 4130 | CDS product envelope glycoprotein K              | 3544-3567 | 6:03:01  | GGGGGTCGAGGCGGAAGTCGGCGG    |
| 3624                                                   | 3642 | 3135 | 4130 | CDS product envelope glycoprotein K              | 3624-3642 | 4:01:01  | GGGCCGTGGCCGCCATGG          |
| 3627                                                   | 3644 | 3135 | 4130 | CDS product envelope glycoprotein K              | 3627-3644 | 4:01:01  | CCGTGGCCGCCATGGCC           |
| 3683                                                   | 3699 | 3135 | 4130 | CDS product envelope glycoprotein K              | 3683-3699 | 4:01:01  | GGGGCTGAGGAGGTCGG           |
| 3901                                                   | 3918 | 3135 | 4130 | CDS product envelope glycoprotein K              | 3901-3918 | 4:01:01  | GGGCGTGGAGGCACGGGG          |
| 4108                                                   | 4120 | 3135 | 4130 | CDS product envelope glycoprotein K              | 4108-4120 | 4:01:01  | CCGTCCGCCCCC                |
| 4151                                                   | 4179 | 4105 | 7362 | CDS product helicase-primase primase subunit     | 4151-4179 | 5:02:01  |                             |
| GGTCCACGGTGAACACGGTCCCGAGGCGG                          |      |      |      |                                                  |           |          |                             |

|      |      |      |      |                                                                                                  |           |         |
|------|------|------|------|--------------------------------------------------------------------------------------------------|-----------|---------|
| 4380 | 4410 | 4105 | 7362 | CDS product helicase-primase primase subunit<br>GGCGGCCACGAGGCGGGCGCCGGGCCCTGG                   | 4380-4410 | 6:03:01 |
| 4494 | 4513 | 4105 | 7362 | CDS product helicase-primase primase subunit<br>GGCGCCGCGGTTGTCGGCGG                             | 4494-4513 | 4:01:01 |
| 4562 | 4585 | 4105 | 7362 | CDS product helicase-primase primase subunit<br>GGAAGGCCGCGCGGTTGACGGCGG                         | 4562-4585 | 5:02:01 |
| 4685 | 4726 | 4105 | 7362 | CDS product helicase-primase primase subunit<br>GGTGCGGGTCGCGGTGCGCGGCGACGAAGGCGGCCACGTCGG       | 4685-4726 | 7:04:01 |
| 4774 | 4796 | 4105 | 7362 | CDS product helicase-primase primase subunit<br>CCGCCCCGCGCGCCCGGCTTGCC                          | 4774-4796 | 4:01:01 |
| 4865 | 4893 | 4105 | 7362 | CDS product helicase-primase primase subunit<br>GGTAGCGGCTCATGGCTCGGCGAAGGGG                     | 4865-4893 | 5:02:01 |
| 4944 | 4992 | 4105 | 7362 | CDS product helicase-primase primase subunit<br>GGGGCCGCGGCAATGAGGTAGGGCGCCGGGACGGGCACGGCCACGCGG | 4944-4992 | 8:05:02 |
| 5024 | 5066 | 4105 | 7362 | CDS product helicase-primase primase subunit<br>CCGCTAGGGCCGCGCGCCCGCGTCCTCGGCGCCAGCGCCCC        | 5024-5066 | 8:05:02 |
| 5068 | 5096 | 4105 | 7362 | CDS product helicase-primase primase subunit<br>GGCGGCTCGCCGGGCGGGCGTCCGCGGG                     | 5068-5096 | 5:02:01 |
| 5193 | 5232 | 4105 | 7362 | CDS product helicase-primase primase subunit<br>GGACGGCGAGGCGCTGCCGGCGGGAGGGCGGCCGAGGGG          | 5193-5232 | 8:05:02 |
| 5256 | 5292 | 4105 | 7362 | CDS product helicase-primase primase subunit<br>GGGGTGCGGGGCCAGGCGTCGGCGGCGGCCTCGGGG             | 5256-5292 | 7:04:01 |
| 5351 | 5379 | 4105 | 7362 | CDS product helicase-primase primase subunit                                                     | 5351-5379 | 5:02:01 |

GGTCCCCGCGGGGATGGGGCGCCTAAGG

|                                                |      |      |      |                                              |           |         |              |
|------------------------------------------------|------|------|------|----------------------------------------------|-----------|---------|--------------|
| 5406                                           | 5422 | 4105 | 7362 | CDS product helicase-primase primase subunit | 5406-5422 | 4:01:01 |              |
| GGTCACGGCGAGGCGGG                              |      |      |      |                                              |           |         |              |
| 5464                                           | 5480 | 4105 | 7362 | CDS product helicase-primase primase subunit | 5464-5480 | 4:01:01 |              |
| GGCGCGGGCGGGCCCGG                              |      |      |      |                                              |           |         |              |
| 5497                                           | 5513 | 4105 | 7362 | CDS product helicase-primase primase subunit | 5497-5513 | 4:01:01 |              |
| CCCCCGCCGCGCTGCC                               |      |      |      |                                              |           |         |              |
| 5534                                           | 5545 | 4105 | 7362 | CDS product helicase-primase primase subunit | 5534-5545 | 4:01:01 | GGAGGAGGGCGG |
| 5592                                           | 5608 | 4105 | 7362 | CDS product helicase-primase primase subunit | 5592-5608 | 4:01:01 |              |
| GGCAGCGGCGACGGCGG                              |      |      |      |                                              |           |         |              |
| 5609                                           | 5655 | 4105 | 7362 | CDS product helicase-primase primase subunit | 5609-5655 | 9:06:02 |              |
| CCGCGACCTCGGCCGCCACCTCCCCGGGTCCAGGGCGGCCACGTCC |      |      |      |                                              |           |         |              |
| 5694                                           | 5711 | 4105 | 7362 | CDS product helicase-primase primase subunit | 5694-5711 | 4:01:01 |              |
| GGCCTGGTGGCCGCGCGG                             |      |      |      |                                              |           |         |              |
| 5723                                           | 5746 | 4105 | 7362 | CDS product helicase-primase primase subunit | 5723-5746 | 4:01:01 |              |
| GGTAGACGGGCGCGGGCACC GCGG                      |      |      |      |                                              |           |         |              |
| 5741                                           | 5772 | 4105 | 7362 | CDS product helicase-primase primase subunit | 5741-5772 | 5:02:01 |              |
| CCGCGGTCCCGCGCGCGCCAAAAAGCCCGTCC               |      |      |      |                                              |           |         |              |
| 5875                                           | 5906 | 4105 | 7362 | CDS product helicase-primase primase subunit | 5875-5906 | 6:03:01 |              |
| GGCGCGGGCGGCGGCGTCGGGGCCAGCGG                  |      |      |      |                                              |           |         |              |
| 5911                                           | 5937 | 4105 | 7362 | CDS product helicase-primase primase subunit | 5911-5937 | 6:03:01 |              |
| CCCGCGCGCGCGCGGCGTGCCGTCC                      |      |      |      |                                              |           |         |              |
| 6021                                           | 6063 | 4105 | 7362 | CDS product helicase-primase primase subunit | 6021-6063 | 7:04:01 |              |

|                                                |      |      |      |                                              |           |          |              |
|------------------------------------------------|------|------|------|----------------------------------------------|-----------|----------|--------------|
| GGTGCGCCCGGGGGCCCGTCGGTCCTCGCGCGGGCGCCAGG      |      |      |      |                                              |           |          |              |
| 6090                                           | 6124 | 4105 | 7362 | CDS product helicase-primase primase subunit | 6090-6124 | 6:03:01  |              |
| GGCCTCGGCCGTCGCGGGGGCAGCCGGGCGACGG             |      |      |      |                                              |           |          |              |
| 6209                                           | 6220 | 4105 | 7362 | CDS product helicase-primase primase subunit | 6209-6220 | 4:01:01  | GGAGGCGGGAGG |
| 6230                                           | 6253 | 4105 | 7362 | CDS product helicase-primase primase subunit | 6230-6253 | 5:02:01  |              |
| GGCGCGGCGCAAGGGGGCGCCGG                        |      |      |      |                                              |           |          |              |
| 6264                                           | 6310 | 4105 | 7362 | CDS product helicase-primase primase subunit | 6264-6310 | 10:07:02 |              |
| GGCAGCGGCGGGGGCTCGGTGGCGGTGACGGCACGCAGGTGCTCGG |      |      |      |                                              |           |          |              |
| 6359                                           | 6381 | 4105 | 7362 | CDS product helicase-primase primase subunit | 6359-6381 | 4:01:01  |              |
| CCACGAACTCCGGGTCGGCCACC                        |      |      |      |                                              |           |          |              |
| 6386                                           | 6402 | 4105 | 7362 | CDS product helicase-primase primase subunit | 6386-6402 | 4:01:01  |              |
| GGCTGCGGCGGTCTGTGG                             |      |      |      |                                              |           |          |              |
| 6419                                           | 6438 | 4105 | 7362 | CDS product helicase-primase primase subunit | 6419-6438 | 4:01:01  |              |
| GGCAGCGGACCTCGGCGAGG                           |      |      |      |                                              |           |          |              |
| 6567                                           | 6603 | 4105 | 7362 | CDS product helicase-primase primase subunit | 6567-6603 | 7:04:01  |              |
| GGGGTTGGGCGGCGGCGACGGCGTACGTGGCCAGG            |      |      |      |                                              |           |          |              |
| 6615                                           | 6660 | 4105 | 7362 | CDS product helicase-primase primase subunit | 6615-6660 | 8:05:02  |              |
| GGCCTGCAGGTCGTAGGTGGCGGCGTCGCCGGCGGCTCGGCCTGG  |      |      |      |                                              |           |          |              |
| 6729                                           | 6748 | 4105 | 7362 | CDS product helicase-primase primase subunit | 6729-6748 | 4:01:01  |              |
| GGGGTTCGCGCCGGAGTTGG                           |      |      |      |                                              |           |          |              |
| 6804                                           | 6828 | 4105 | 7362 | CDS product helicase-primase primase subunit | 6804-6828 | 5:02:01  |              |
| GGCCAGGCCGCGGCGCCCGGCCGGG                      |      |      |      |                                              |           |          |              |
| 6806                                           | 6825 | 4105 | 7362 | CDS product helicase-primase primase subunit | 6806-6825 | 4:01:01  |              |

|                                                              |      |      |      |                                              |           |                                    |  |
|--------------------------------------------------------------|------|------|------|----------------------------------------------|-----------|------------------------------------|--|
| CCAGGCCGCGGCGCCCGGCC                                         |      |      |      |                                              |           |                                    |  |
| 7065                                                         | 7105 | 4105 | 7362 | CDS product helicase-primase primase subunit | 7065-7105 | 7:04:01                            |  |
| GGCGCAGGCAAAGACGGGCCAGGCGGGGCGCGCGCGG                        |      |      |      |                                              |           |                                    |  |
| 7111                                                         | 7128 | 4105 | 7362 | CDS product helicase-primase primase subunit | 7111-7128 | 4:01:01                            |  |
| CCGCCCCGCGGGCGCCCC                                           |      |      |      |                                              |           |                                    |  |
| 7249                                                         | 7271 | 4105 | 7362 | CDS product helicase-primase primase subunit | 7249-7271 | 5:02:01                            |  |
| CCGCGCGCGGCTCCTCCTGGCC                                       |      |      |      |                                              |           |                                    |  |
| 7373                                                         | 7414 | 7361 | 8149 | CDS product tegument protein UL51            | 7373-7414 | 9:06:02                            |  |
| GGCTGGTTGGGTGGCTGTGCGGGCGTGGCGGGGCGCGCGG                     |      |      |      |                                              |           |                                    |  |
| 7476                                                         | 7489 | 7361 | 8149 | CDS product tegument protein UL51            | 7476-7489 | 5:02:01 GGAGGCGGTGGTGG             |  |
| 7490                                                         | 7514 | 7361 | 8149 | CDS product tegument protein UL51            | 7490-7514 | 4:01:01 CCGTCAGCTCCTGCTGCCGCGCC    |  |
| 7521                                                         | 7560 | 7361 | 8149 | CDS product tegument protein UL51            | 7521-7560 | 9:06:02                            |  |
| GGTGGAGGACGTGGTGCGCTCGGCGGACGGCGCGCGCGG                      |      |      |      |                                              |           |                                    |  |
| 7743                                                         | 7786 | 7361 | 8149 | CDS product tegument protein UL51            | 7743-7786 | 8:05:02                            |  |
| GGTGGGCGCCGTGGAGGGCACGACGGACAGCATGGTGGACCAGG                 |      |      |      |                                              |           |                                    |  |
| 7851                                                         | 7874 | 7361 | 8149 | CDS product tegument protein UL51            | 7851-7874 | 4:01:01 GGGCATCCGGGCGCAGGGCGCGGG   |  |
| 7884                                                         | 7905 | 7361 | 8149 | CDS product tegument protein UL51            | 7884-7905 | 5:02:01 GGAGGCGAAGGCGAAGGCCGGG     |  |
| 7914                                                         | 7939 | 7361 | 8149 | CDS product tegument protein UL51            | 7914-7939 | 5:02:01 GGCGGTCGCCGGTGCTGAAGGCCGGG |  |
| 7935                                                         | 7996 | 7361 | 8149 | CDS product tegument protein UL51            | 7935-7996 | 12:09:03                           |  |
| CCGGGCCCCGCCCCCTGCCGCTGCAGCCGGCGGGCCTGCCTCCGGCCCCGGCCCCGGCCC |      |      |      |                                              |           |                                    |  |
| 8008                                                         | 8051 | 7361 | 8149 | CDS product tegument protein UL51            | 8008-8051 | 12:09:03                           |  |
| CCCCCGGTCCCGCCCTGCCGCCGCCGCCACCGTTGCCGCG                     |      |      |      |                                              |           |                                    |  |
| 8105                                                         | 8127 | 7361 | 8149 | CDS product tegument protein UL51            | 8105-8127 | 6:03:01 CCGCCTCCTCCTCTACGCCCGCC    |  |

|                                                                        |      |      |       |                                         |           |          |                             |
|------------------------------------------------------------------------|------|------|-------|-----------------------------------------|-----------|----------|-----------------------------|
| 8292                                                                   | 8318 | 8287 | 9252  | CDS product deoxyuridine triphosphatase | 8292-8318 | 4:01:01  |                             |
| CCCGGTGGACCCGAAGCCGCGCGACCC                                            |      |      |       |                                         |           |          |                             |
| 8343                                                                   | 8361 | 8287 | 9252  | CDS product deoxyuridine triphosphatase | 8343-8361 | 4:01:01  | GGCGAGGTCGGCGACGCGG         |
| 8372                                                                   | 8448 | 8287 | 9252  | CDS product deoxyuridine triphosphatase | 8372-8448 | 15:12:03 |                             |
| GGCGCGGGGCGCCGGGGGCGGGCGGGCGGGGCTTGTCGGGAAGGGCTCGCGGTCGTTGAGGCTGGGCGGG |      |      |       |                                         |           |          |                             |
| 8546                                                                   | 8580 | 8287 | 9252  | CDS product deoxyuridine triphosphatase | 8546-8580 | 7:04:01  |                             |
| GGCAGGGCTCCCCAGGGGGCCAGGCTGTCGGCAGG                                    |      |      |       |                                         |           |          |                             |
| 8748                                                                   | 8771 | 8287 | 9252  | CDS product deoxyuridine triphosphatase | 8748-8771 | 4:01:01  | GGGGGCGAACGTGGCAAAGAAGGG    |
| 8782                                                                   | 8805 | 8287 | 9252  | CDS product deoxyuridine triphosphatase | 8782-8805 | 7:04:01  | CCCGCCTCCCACCCGGCCCCCGCC    |
| 8825                                                                   | 8842 | 8287 | 9252  | CDS product deoxyuridine triphosphatase | 8825-8842 | 4:01:01  | GGCGGGGCACCGTGGCGG          |
| 8874                                                                   | 8896 | 8287 | 9252  | CDS product deoxyuridine triphosphatase | 8874-8896 | 4:01:01  | CCCCCGCGGGGCCGGGCGCCC       |
| 8952                                                                   | 8972 | 8287 | 9252  | CDS product deoxyuridine triphosphatase | 8952-8972 | 5:02:01  | GGCGGGCGGGCGGGCCCCGGG       |
| 9066                                                                   | 9086 | 8287 | 9252  | CDS product deoxyuridine triphosphatase | 9066-9086 | 4:01:01  | CCGCCCCGCGGTGCCTCTCC        |
| 9098                                                                   | 9126 | 8287 | 9252  | CDS product deoxyuridine triphosphatase | 9098-9126 | 5:02:01  |                             |
| CCGCCAGCGCAACCGGGCCCCAGAGCGCC                                          |      |      |       |                                         |           |          |                             |
| 9170                                                                   | 9180 | 8287 | 9252  | CDS product deoxyuridine triphosphatase | 9170-9180 | 4:01:01  | CCTCCGCCGCC                 |
| 9287                                                                   | 9321 | 9203 | 9490  | CDS product envelope glycoprotein N     | 9287-9321 | 5:02:01  |                             |
| GGCGCGAGGAAGCGATGGACTTCTGGAGCGCGGGG                                    |      |      |       |                                         |           |          |                             |
| 9471                                                                   | 9485 | 9203 | 9490  | CDS product envelope glycoprotein N     | 9471-9485 | 4:01:01  | GGTGCGGGGCGGGG              |
| 9625                                                                   | 9656 | 9624 | 10427 | CDS product tegument protein VP22       | 9625-9656 | 5:02:01  |                             |
| GGCCCCGTTCCACAGGTCCTCGGACGACGAGG                                       |      |      |       |                                         |           |          |                             |
| 9764                                                                   | 9790 | 9624 | 10427 | CDS product tegument protein VP22       | 9764-9790 | 5:02:01  | CCCGAGCCCAAGCCCAGGCCCGGGCCC |
| 9780                                                                   | 9802 | 9624 | 10427 | CDS product tegument protein VP22       | 9780-9802 | 4:01:01  | GGCCCCGGGCCCCACGGGCGCCGG    |

|                                                              |       |       |       |                                                   |             |          |                         |
|--------------------------------------------------------------|-------|-------|-------|---------------------------------------------------|-------------|----------|-------------------------|
| 9810                                                         | 9844  | 9624  | 10427 | CDS product tegument protein VP22                 | 9810-9844   | 6:03:01  |                         |
| CCCGCTCGTGCCCTGGCGCCGACCGCCCCGTCC                            |       |       |       |                                                   |             |          |                         |
| 9872                                                         | 9896  | 9624  | 10427 | CDS product tegument protein VP22                 | 9872-9896   | 6:03:01  | CCCGCCGCCGCGCGCCGCCCGCC |
| 9922                                                         | 9970  | 9624  | 10427 | CDS product tegument protein VP22                 | 9922-9970   | 9:06:02  |                         |
| CCCGCCGCGGCCGCTCCCGCCCAACGCTCCCGCTACCAGGCAGGCC               |       |       |       |                                                   |             |          |                         |
| 9981                                                         | 9994  | 9624  | 10427 | CDS product tegument protein VP22                 | 9981-9994   | 4:01:01  | CCTCCGGCGCCGCC          |
| 10005                                                        | 10068 | 9624  | 10427 | CDS product tegument protein VP22                 | 10005-10068 | 14:11:03 |                         |
| CCGCGCCCGTCCCGCCCCGAACCCGCGCGCCCCCGGCGCCGCCGTCGCGTCCGGCCGGCC |       |       |       |                                                   |             |          |                         |
| 10290                                                        | 10309 | 9624  | 10427 | CDS product tegument protein VP22                 | 10290-10309 | 5:02:01  | CCGGGCTCCTCGCCGCCGCC    |
| 10318                                                        | 10357 | 9624  | 10427 | CDS product tegument protein VP22                 | 10318-10357 | 8:05:02  |                         |
| CCTAGCCACGCGGGCCAGCGCCCCGCGCTCCGGCCCCC                       |       |       |       |                                                   |             |          |                         |
| 10351                                                        | 10370 | 9624  | 10427 | CDS product tegument protein VP22                 | 10351-10370 | 4:01:01  | GGCCCCGCGGGCGGCAGGG     |
| 10371                                                        | 10384 | 9624  | 10427 | CDS product tegument protein VP22                 | 10371-10384 | 4:01:01  | CCCCACGCCAGCC           |
| 10406                                                        | 10420 | 9624  | 10427 | CDS product tegument protein VP22                 | 10406-10420 | 4:01:01  | GGCGGGCGGGCCCGG         |
| 10689                                                        | 10708 | 10620 | 12068 | CDS product transactivating tegument protein VP16 | 10689-10708 | 4:01:01  |                         |
| CCCCTGACGGTCCGTCCCCC                                         |       |       |       |                                                   |             |          |                         |
| 10724                                                        | 10750 | 10620 | 12068 | CDS product transactivating tegument protein VP16 | 10724-10750 | 6:03:01  |                         |
| CCGCCCCCGCGCCCGGCGCCCCTGGCC                                  |       |       |       |                                                   |             |          |                         |
| 10809                                                        | 10832 | 10620 | 12068 | CDS product transactivating tegument protein VP16 | 10809-10832 | 5:02:01  |                         |
| GGGCCATGGAGCGGTGGAACGAGG                                     |       |       |       |                                                   |             |          |                         |
| 10927                                                        | 10955 | 10620 | 12068 | CDS product transactivating tegument protein VP16 | 10927-10955 | 5:02:01  |                         |
| GGCGGTGCCTGGGGACGCGGAGCGCTTGG                                |       |       |       |                                                   |             |          |                         |
| 10975                                                        | 10999 | 10620 | 12068 | CDS product transactivating tegument protein VP16 | 10975-10999 | 6:03:01  |                         |



|                                                    |       |       |       |                                                   |                                              |
|----------------------------------------------------|-------|-------|-------|---------------------------------------------------|----------------------------------------------|
| CCAGCCGCTTCCCGCACCGCCGGCC                          |       |       |       |                                                   |                                              |
| 10996                                              | 11039 | 10620 | 12068 | CDS product transactivating tegument protein VP16 | 10996-11039 8:05:02                          |
| GGCCTCGGAGGAGGGCCTCCCGAGTATGTGGCCGGCGTACAGG        |       |       |       |                                                   |                                              |
| 11134                                              | 11174 | 10620 | 12068 | CDS product transactivating tegument protein VP16 | 11134-11174 8:05:02                          |
| GGCGGCGCGTGCCGAGGCGCGGCGGGCGGGCGCCAGG              |       |       |       |                                                   |                                              |
| 11187                                              | 11206 | 10620 | 12068 | CDS product transactivating tegument protein VP16 | 11187-11206 5:02:01                          |
| GGCAGCTGGTGGCGGCGCGG                               |       |       |       |                                                   |                                              |
| 11364                                              | 11380 | 10620 | 12068 | CDS product transactivating tegument protein VP16 | 11364-11380 4:01:01                          |
| CCTGCCTGTTCCACCCC                                  |       |       |       |                                                   |                                              |
| 11396                                              | 11446 | 10620 | 12068 | CDS product transactivating tegument protein VP16 | 11396-11446 10:07:02                         |
| GGCGTCGTGGCGCTGGAGGACGGCTTCTTGACGCGGCGGAGCTGCGGCGG |       |       |       |                                                   |                                              |
| 11482                                              | 11528 | 10620 | 12068 | CDS product transactivating tegument protein VP16 | 11482-11528 8:05:02                          |
| GGTCCGCGCGGGCTGGTCGAGGTTGAAGTGGGGCCTCTGGTGGAGG     |       |       |       |                                                   |                                              |
| 11611                                              | 11639 | 10620 | 12068 | CDS product transactivating tegument protein VP16 | 11611-11639 7:04:01                          |
| GGCCGGCGGGCGGCTGGCGCCGAGCGGG                       |       |       |       |                                                   |                                              |
| 11795                                              | 11833 | 10620 | 12068 | CDS product transactivating tegument protein VP16 | 11795-11833 7:04:01                          |
| CCTTCAGCCAAGGGCGCCGCCCGGCGAGTTGCCGCC               |       |       |       |                                                   |                                              |
| 11904                                              | 11946 | 10620 | 12068 | CDS product transactivating tegument protein VP16 | 11904-11946 7:04:01                          |
| CCTTGGCCTTAGCCGAGCCCGCGGCAGCCCTGGCCCCGGCCCC        |       |       |       |                                                   |                                              |
| 11958                                              | 12006 | 10620 | 12068 | CDS product transactivating tegument protein VP16 | 11958-12006 8:05:02                          |
| CCCCAGCCGAGCCCGCGGCGGCCGTCGCCGGGCCAAGCCCGGCAAACCC  |       |       |       |                                                   |                                              |
| 12262                                              | 12285 | 12239 | 14464 | CDS product tegument protein VP13/14              | 12262-12285 5:02:01 CCTGAGCGCCGCCCGCGCCGCTCC |
| 12294                                              | 12334 | 12239 | 14464 | CDS product tegument protein VP13/14              | 12294-12334 6:03:01                          |

|                                             |       |       |       |                                      |                                              |
|---------------------------------------------|-------|-------|-------|--------------------------------------|----------------------------------------------|
| CCGCACGCACCCGTTCCAGCGCCCCTCTGCCCCGGCGGAGCC  |       |       |       |                                      |                                              |
| 12378                                       | 12419 | 12239 | 14464 | CDS product tegument protein VP13/14 | 12378-12419 7:04:01                          |
| CCCGCGGGTCCGGCGCCCGCGCCTGACTTCCAGCGGCCCCC   |       |       |       |                                      |                                              |
| 12614                                       | 12642 | 12239 | 14464 | CDS product tegument protein VP13/14 | 12614-12642 5:02:01                          |
| CCCACCTGCGCGCCATAGAGGCCCTGCCC               |       |       |       |                                      |                                              |
| 12781                                       | 12807 | 12239 | 14464 | CDS product tegument protein VP13/14 | 12781-12807 7:04:01                          |
| GGCGGCGGGGCGGCCAGGAACCCGGG                  |       |       |       |                                      |                                              |
| 12907                                       | 12922 | 12239 | 14464 | CDS product tegument protein VP13/14 | 12907-12922 4:01:01 CCCCCGCTCCTCAGCC         |
| 12924                                       | 12967 | 12239 | 14464 | CDS product tegument protein VP13/14 | 12924-12967 10:07:02                         |
| GGAGGCGGCCGCTGCGGCTGCGGGGAGAGGAGCGTGGTGGAGG |       |       |       |                                      |                                              |
| 13019                                       | 13041 | 12239 | 14464 | CDS product tegument protein VP13/14 | 13019-13041 5:02:01 GGATTTTGAGGGCCGGGTGCGG   |
| 13121                                       | 13142 | 12239 | 14464 | CDS product tegument protein VP13/14 | 13121-13142 4:01:01 GGCGCGCCTGGGAGATGGCCGG   |
| 13172                                       | 13189 | 12239 | 14464 | CDS product tegument protein VP13/14 | 13172-13189 4:01:01 GGAGCACGGTGGACCCGG       |
| 13227                                       | 13254 | 12239 | 14464 | CDS product tegument protein VP13/14 | 13227-13254 6:03:01                          |
| GGGCACCCGGCCCCGCTGGTGTGGCGG                 |       |       |       |                                      |                                              |
| 13289                                       | 13304 | 12239 | 14464 | CDS product tegument protein VP13/14 | 13289-13304 5:02:01 GGCTGGGGGTGGGGGG         |
| 13409                                       | 13427 | 12239 | 14464 | CDS product tegument protein VP13/14 | 13409-13427 4:01:01 GGCCGGGGCGCGGGGCGG       |
| 13449                                       | 13468 | 12239 | 14464 | CDS product tegument protein VP13/14 | 13449-13468 5:02:01 GGCGCGGTTGGGCTGCTGG      |
| 13869                                       | 13885 | 12239 | 14464 | CDS product tegument protein VP13/14 | 13869-13885 4:01:01 GGAGACGGTGGACTCGG        |
| 13886                                       | 13903 | 12239 | 14464 | CDS product tegument protein VP13/14 | 13886-13903 4:01:01 CCACCTTCCAGGAGCCCC       |
| 13933                                       | 13956 | 12239 | 14464 | CDS product tegument protein VP13/14 | 13933-13956 5:02:01 GGGGAGGCCTACGTGGCGGTGCGG |
| 14101                                       | 14124 | 12239 | 14464 | CDS product tegument protein VP13/14 | 14101-14124 5:02:01 GGCGCAGCGGTGTACGGGGGCCGG |
| 14190                                       | 14224 | 12239 | 14464 | CDS product tegument protein VP13/14 | 14190-14224 6:03:01                          |

|                                        |       |       |       |                                      |                                              |
|----------------------------------------|-------|-------|-------|--------------------------------------|----------------------------------------------|
| GGTGCGCCCGGTGTCCCTGGTGGAGTTCTGGGAGG    |       |       |       |                                      |                                              |
| 14280                                  | 14302 | 12239 | 14464 | CDS product tegument protein VP13/14 | 14280-14302 5:02:01 GGCCGGCAAGCGGCGGGTCATGG  |
| 14356                                  | 14376 | 12239 | 14464 | CDS product tegument protein VP13/14 | 14356-14376 4:01:01 GGTTCGCGGCCGGTGCTTGGG    |
| 14385                                  | 14407 | 12239 | 14464 | CDS product tegument protein VP13/14 | 14385-14407 5:02:01 GGACATCGCGGAGCGCTGGCGG   |
| 14670                                  | 14707 | 14597 | 16801 | CDS product tegument protein VP11/12 | 14670-14707 6:03:01                          |
| GGACGCCACGGCCGCGGCCGTAGTGGCCCTGCAGGAGG |       |       |       |                                      |                                              |
| 14675                                  | 14698 | 14597 | 16801 | CDS product tegument protein VP11/12 | 14675-14698 4:01:01 CCACGGCCGCGGCCGTAGTGGCCC |
| 14790                                  | 14815 | 14597 | 16801 | CDS product tegument protein VP11/12 | 14790-14815 5:02:01                          |
| GGAGGCGCTGTTCTGTCTCGACTCGG             |       |       |       |                                      |                                              |
| 14867                                  | 14886 | 14597 | 16801 | CDS product tegument protein VP11/12 | 14867-14886 4:01:01 GGGTGCTGGCGGGCGCGCGG     |
| 14974                                  | 15004 | 14597 | 16801 | CDS product tegument protein VP11/12 | 14974-15004 7:04:01                          |
| GGCGCGGCCGCGCGCGCGATGGAGCAGG           |       |       |       |                                      |                                              |
| 15090                                  | 15112 | 14597 | 16801 | CDS product tegument protein VP11/12 | 15090-15112 4:01:01 GGCGTACAAGCCGCTGCGGCGG   |
| 15322                                  | 15341 | 14597 | 16801 | CDS product tegument protein VP11/12 | 15322-15341 4:01:01 CCGCGCGAGCCGCGGCCGCC     |
| 15360                                  | 15377 | 14597 | 16801 | CDS product tegument protein VP11/12 | 15360-15377 5:02:01 CCACCTGACCGCCGGCCC       |
| 15417                                  | 15439 | 14597 | 16801 | CDS product tegument protein VP11/12 | 15417-15439 5:02:01 GGCCCTGACGGCGGCGGCTGG    |
| 15519                                  | 15541 | 14597 | 16801 | CDS product tegument protein VP11/12 | 15519-15541 4:01:01 GGCCGCGGTCGAGCTGGCGTCGG  |
| 15542                                  | 15565 | 14597 | 16801 | CDS product tegument protein VP11/12 | 15542-15565 5:02:01 CCGTGACCAACCTGCAGTACC    |
| 15676                                  | 15702 | 14597 | 16801 | CDS product tegument protein VP11/12 | 15676-15702 6:03:01                          |
| CCGCTGATGCCAACCATGACCTCCGCC            |       |       |       |                                      |                                              |
| 15707                                  | 15738 | 14597 | 16801 | CDS product tegument protein VP11/12 | 15707-15738 6:03:01                          |
| GGGCGGCGCTGGAGCGGCACGCGAGCTGG          |       |       |       |                                      |                                              |
| 15818                                  | 15850 | 14597 | 16801 | CDS product tegument protein VP11/12 | 15818-15850 6:03:01                          |

|                                                                     |       |       |       |                                      |                                             |
|---------------------------------------------------------------------|-------|-------|-------|--------------------------------------|---------------------------------------------|
| GGCTCGGCGGGAGCCGCGGGCTGCTGGCGCCGG                                   |       |       |       |                                      |                                             |
| 15847                                                               | 15923 | 14597 | 16801 | CDS product tegument protein VP11/12 | 15847-15923 15:12:03                        |
| CCGGTGCGCCGCCGCGCGGCCCGCAGAGCCACGCGCCCCCTGCCAGCCCGCCGCGCGGCCACCCACC |       |       |       |                                      |                                             |
| 16067                                                               | 16081 | 14597 | 16801 | CDS product tegument protein VP11/12 | 16067-16081 5:02:01 GGCGGGAGGCGGCGG         |
| 16115                                                               | 16134 | 14597 | 16801 | CDS product tegument protein VP11/12 | 16115-16134 4:01:01 CCTCGTCCCCGCCCTTCGCC    |
| 16179                                                               | 16201 | 14597 | 16801 | CDS product tegument protein VP11/12 | 16179-16201 5:02:01 CCCCATGCCCGCCCCGCCGCCCC |
| 16242                                                               | 16264 | 14597 | 16801 | CDS product tegument protein VP11/12 | 16242-16264 5:02:01 CCCCATGCCCGCCCCGCCGCCCC |
| 16375                                                               | 16396 | 14597 | 16801 | CDS product tegument protein VP11/12 | 16375-16396 4:01:01 GGAGCCGAGCCGGGGACGGGG   |
| 16479                                                               | 16545 | 14597 | 16801 | CDS product tegument protein VP11/12 | 16479-16545 11:08:02                        |
| CCGGCCCCGCGCCCCGGCCCCGGCCCCGGCCCCGTGCACCGAGCGCCGGGCAACCCTACCCGGTCC  |       |       |       |                                      |                                             |
| 16481                                                               | 16507 | 14597 | 16801 | CDS product tegument protein VP11/12 | 16481-16507 5:02:01                         |
| GGCCCCGCGCCCCGGCCCCGGCCCCGG                                         |       |       |       |                                      |                                             |
| 16560                                                               | 16594 | 14597 | 16801 | CDS product tegument protein VP11/12 | 16560-16594 6:03:01                         |
| CCCGCGCCTCCGCGCCCTAGAGGACCCGCACGGCC                                 |       |       |       |                                      |                                             |
| 16591                                                               | 16616 | 14597 | 16801 | CDS product tegument protein VP11/12 | 16591-16616 6:03:01                         |
| GGCCTGGAGGCGCTGGCGGCCGCCGG                                          |       |       |       |                                      |                                             |
| 16610                                                               | 16642 | 14597 | 16801 | CDS product tegument protein VP11/12 | 16610-16642 6:03:01                         |
| CCGCCGGCGCGGCACACCGCGGCCACAACC                                      |       |       |       |                                      |                                             |
| 16664                                                               | 16683 | 14597 | 16801 | CDS product tegument protein VP11/12 | 16664-16683 4:01:01 CCCGCGCCAGCGGGTCCTCC    |
| 16741                                                               | 16759 | 14597 | 16801 | CDS product tegument protein VP11/12 | 16741-16759 5:02:01 CCTCCACCTTCCCGCGCCC     |
| 17081                                                               | 17103 | 17022 | 18482 | CDS product envelope glycoprotein C  | 17081-17103 4:01:01 GGCGCCGAGCCCGAGGCGACGG  |
| 17159                                                               | 17211 | 17022 | 18482 | CDS product envelope glycoprotein C  | 17159-17211 9:06:02                         |
| GGCGGTGCGGAGAACTCGGGCAGCGGCCCGGTAGCCGGTGGCAGTGCAGG                  |       |       |       |                                      |                                             |

|                                                               |       |       |       |                                     |
|---------------------------------------------------------------|-------|-------|-------|-------------------------------------|
| 17414                                                         | 17456 | 17022 | 18482 | CDS product envelope glycoprotein C |
| GGGCGGGCGGTAGACGGCCGGCGTGGCAGCCGCGGCGAAGCGG                   |       |       |       |                                     |
| 17500                                                         | 17521 | 17022 | 18482 | CDS product envelope glycoprotein C |
| 17638                                                         | 17657 | 17022 | 18482 | CDS product envelope glycoprotein C |
| 17666                                                         | 17682 | 17022 | 18482 | CDS product envelope glycoprotein C |
| 17683                                                         | 17702 | 17022 | 18482 | CDS product envelope glycoprotein C |
| 17709                                                         | 17741 | 17022 | 18482 | CDS product envelope glycoprotein C |
| GGCCGGGGCTCGACGGAGACGGCGGGTGCGCGG                             |       |       |       |                                     |
| 17813                                                         | 17873 | 17022 | 18482 | CDS product envelope glycoprotein C |
| GGCTGCGGCGGTCAGGGAGCGCACGGTCAGGGGCAGGCTGCCGGGGTCGGCGGGCGAGGGG |       |       |       |                                     |
| 17945                                                         | 17971 | 17022 | 18482 | CDS product envelope glycoprotein C |
| 18084                                                         | 18108 | 17022 | 18482 | CDS product envelope glycoprotein C |
| 18188                                                         | 18205 | 17022 | 18482 | CDS product envelope glycoprotein C |
| 18243                                                         | 18277 | 17022 | 18482 | CDS product envelope glycoprotein C |
| GGCGTGGCCGGGGGGCTGTGGGAAGGAGCTGTGGG                           |       |       |       |                                     |
| 18317                                                         | 18349 | 17022 | 18482 | CDS product envelope glycoprotein C |
| GGCCGGGGTTGGGGAGGGCGGGCTTGGGGAGGG                             |       |       |       |                                     |
| 18360                                                         | 18384 | 17022 | 18482 | CDS product envelope glycoprotein C |
| 18385                                                         | 18401 | 17022 | 18482 | CDS product envelope glycoprotein C |
| 18729                                                         | 18755 | 18671 | 19813 | CDS product envelope protein UL43   |
| 18764                                                         | 18785 | 18671 | 19813 | CDS product envelope protein UL43   |
| 18795                                                         | 18829 | 18671 | 19813 | CDS product envelope protein UL43   |
| CCACCAGCGCGCCCGCGGTGGCCGAGGCCAGGGCC                           |       |       |       |                                     |

|             |                                    |
|-------------|------------------------------------|
| 17414-17456 | 8:05:02                            |
| 17500-17521 | 6:03:01 GGTGCGGGGTGGGCGGTTGG       |
| 17638-17657 | 4:01:01 GGCGCGTGGAGCGCGGCGGG       |
| 17666-17682 | 4:01:01 GGCGGCGCGGCACACGG          |
| 17683-17702 | 4:01:01 CCGCGTAGCCGGCGCCCTCC       |
| 17709-17741 | 6:03:01                            |
| 17813-17873 | 11:08:02                           |
| 17945-17971 | 5:02:01 GGGCGGGCGCGCGGAAGGGTTGGG   |
| 18084-18108 | 5:02:01 GGCTCGGCATACGGGGCGGCCACGG  |
| 18188-18205 | 5:02:01 GGCGGGCGCGCGCCGG           |
| 18243-18277 | 7:04:01                            |
| 18317-18349 | 7:04:01                            |
| 18360-18384 | 6:03:01 GGCGGGGCAAGGGCGAGGGCGAGG   |
| 18385-18401 | 4:01:01 CCTCGCCCTCCGCTTCC          |
| 18729-18755 | 5:02:01 CCTTGGCCACGTGCGCCGCGCCAGCC |
| 18764-18785 | 4:01:01 CCGCGCCCGCGCGCCGACCC       |
| 18795-18829 | 6:03:01                            |

|                                                |       |       |       |                                           |
|------------------------------------------------|-------|-------|-------|-------------------------------------------|
| 18811                                          | 18834 | 18671 | 19813 | CDS product envelope protein UL43         |
| 18839                                          | 18852 | 18671 | 19813 | CDS product envelope protein UL43         |
| 19009                                          | 19032 | 18671 | 19813 | CDS product envelope protein UL43         |
| 19043                                          | 19072 | 18671 | 19813 | CDS product envelope protein UL43         |
| CCCGGGGCCAGAGCGCCGCCGCGCGGCC                   |       |       |       |                                           |
| 19066                                          | 19082 | 18671 | 19813 | CDS product envelope protein UL43         |
| 19156                                          | 19173 | 18671 | 19813 | CDS product envelope protein UL43         |
| 19191                                          | 19214 | 18671 | 19813 | CDS product envelope protein UL43         |
| 19252                                          | 19268 | 18671 | 19813 | CDS product envelope protein UL43         |
| 19292                                          | 19344 | 18671 | 19813 | CDS product envelope protein UL43         |
| CCCGCGGCCAGCGCCTCGGGCCGCGCCCCAGCGCCGCCGAGAGGCC |       |       |       |                                           |
| 19450                                          | 19469 | 18671 | 19813 | CDS product envelope protein UL43         |
| 19458                                          | 19482 | 18671 | 19813 | CDS product envelope protein UL43         |
| 19492                                          | 19520 | 18671 | 19813 | CDS product envelope protein UL43         |
| GGCAGCGCGGGGCCCGCGGCCAGACGG                    |       |       |       |                                           |
| 19626                                          | 19642 | 18671 | 19813 | CDS product envelope protein UL43         |
| 19686                                          | 19707 | 18671 | 19813 | CDS product envelope protein UL43         |
| 19760                                          | 19796 | 18671 | 19813 | CDS product envelope protein UL43         |
| CCGCAGCCGGCCTTCGTTCCCGCGCAGCCGCTACCC           |       |       |       |                                           |
| 21602                                          | 21626 | 21358 | 22722 | CDS product tegument host shutoff protein |
| GGACCGCGGCATCCACGGGGACCGG                      |       |       |       |                                           |
| 21605                                          | 21632 | 21358 | 22722 | CDS product tegument host shutoff protein |
| CCGCGGCATCCACGGGGACCGGCGGCC                    |       |       |       |                                           |

|             |         |                          |
|-------------|---------|--------------------------|
| 18811-18834 | 5:02:01 | GGTGGCCGAGGCCAGGGCCGCGGG |
| 18839-18852 | 4:01:01 | CCGCCCTCCGCGCC           |
| 19009-19032 | 5:02:01 | CCAGCGCCCGCGCCCTCAGCCCC  |
| 19043-19072 | 5:02:01 |                          |
| 19066-19082 | 4:01:01 | GGCGGCCAGGGCAACGG        |
| 19156-19173 | 4:01:01 | GGGGTCGGCGGGCAGGG        |
| 19191-19214 | 4:01:01 | CCAGGGTCCGAGCGCCGCATACC  |
| 19252-19268 | 4:01:01 | GGCGGCGTCCGCGCGG         |
| 19292-19344 | 9:06:02 |                          |
| 19450-19469 | 4:01:01 | GGCGTAGGCCGCGCCGCGG      |
| 19458-19482 | 4:01:01 | CCGCGGCCGCGCCGTCAGCGCCCC |
| 19492-19520 | 5:02:01 |                          |
| 19626-19642 | 4:01:01 | CCGCTGCCGCGGCCGCC        |
| 19686-19707 | 5:02:01 | CCAGCGCCCGCCGTCAGGCC     |
| 19760-19796 | 6:03:01 |                          |
| 21602-21626 | 4:01:01 |                          |
| 21605-21632 | 4:01:01 |                          |

|                                     |       |       |       |                                                |                                        |
|-------------------------------------|-------|-------|-------|------------------------------------------------|----------------------------------------|
| 21678                               | 21701 | 21358 | 22722 | CDS product tegument host shutoff protein      | 21678-21701 5:02:01                    |
| GGCGGCTCAGGCCGCTCGGGCGG             |       |       |       |                                                |                                        |
| 21725                               | 21742 | 21358 | 22722 | CDS product tegument host shutoff protein      | 21725-21742 4:01:01 GGAGGACGAGGTGCTGGG |
| 21770                               | 21784 | 21358 | 22722 | CDS product tegument host shutoff protein      | 21770-21784 4:01:01 GGACGCGGCGGCCGG    |
| 21795                               | 21816 | 21358 | 22722 | CDS product tegument host shutoff protein      | 21795-21816 6:03:01                    |
| GGCGGGGAGGAGGCGCGAGGG               |       |       |       |                                                |                                        |
| 21836                               | 21852 | 21358 | 22722 | CDS product tegument host shutoff protein      | 21836-21852 4:01:01 GGCGGGGCGCGCGGG    |
| 22136                               | 22159 | 21358 | 22722 | CDS product tegument host shutoff protein      | 22136-22159 5:02:01                    |
| CCACACGGACCTGCACCAGCCGCC            |       |       |       |                                                |                                        |
| 22172                               | 22199 | 21358 | 22722 | CDS product tegument host shutoff protein      | 22172-22199 6:03:01                    |
| GGTGCAGCAGGTGGTGCGGGGGCTGCGG        |       |       |       |                                                |                                        |
| 22204                               | 22232 | 21358 | 22722 | CDS product tegument host shutoff protein      | 22204-22232 6:03:01                    |
| CCGCCGCGCCGAGCCCGCACCACAC           |       |       |       |                                                |                                        |
| 22235                               | 22249 | 21358 | 22722 | CDS product tegument host shutoff protein      | 22235-22249 4:01:01 GGCGGAGGAGTCCGG    |
| 22269                               | 22289 | 21358 | 22722 | CDS product tegument host shutoff protein      | 22269-22289 4:01:01                    |
| CCGCGGCCCCGGCTGCCGCC                |       |       |       |                                                |                                        |
| 22631                               | 22652 | 21358 | 22722 | CDS product tegument host shutoff protein      | 22631-22652 5:02:01                    |
| CCCCACCCGCCCCCTTCGCC                |       |       |       |                                                |                                        |
| 22672                               | 22710 | 21358 | 22722 | CDS product tegument host shutoff protein      | 22672-22710 7:04:01                    |
| GGGACGAGGCCTCCGCGGGCCGGGCGCGGCGGCCG |       |       |       |                                                |                                        |
| 22681                               | 22716 | 21358 | 22722 | CDS product tegument host shutoff protein      | 22681-22716 7:04:01                    |
| CCTCCGCGGGCCGGGCGCGGCGGCGGCCGCC     |       |       |       |                                                |                                        |
| 22926                               | 22958 | 22847 | 23794 | CDS product ribonucleotide reductase subunit 2 | 22926-22958 6:03:01                    |

|                                                            |       |       |       |                                                |                                  |
|------------------------------------------------------------|-------|-------|-------|------------------------------------------------|----------------------------------|
| GGGCCAGAGGAAAATCGGTCCCAGGAGGCGGGG                          |       |       |       |                                                |                                  |
| 22970                                                      | 22981 | 22847 | 23794 | CDS product ribonucleotide reductase subunit 2 | 22970-22981 4:01:01 GGAGGCAGGTGG |
| 23202                                                      | 23224 | 22847 | 23794 | CDS product ribonucleotide reductase subunit 2 | 23202-23224 4:01:01              |
| GGCTGATGAGGTCGTTGGTTTGG                                    |       |       |       |                                                |                                  |
| 23241                                                      | 23261 | 22847 | 23794 | CDS product ribonucleotide reductase subunit 2 | 23241-23261 4:01:01              |
| GGTTGTGGGTGCGCAGGTAGG                                      |       |       |       |                                                |                                  |
| 23328                                                      | 23386 | 22847 | 23794 | CDS product ribonucleotide reductase subunit 2 | 23328-23386 10:07:02             |
| CCACCGACTCGGCCGCGGCCACGCGCGCTCGAGCCAGTCCACCTTGCGCCGGACTGCC |       |       |       |                                                |                                  |
| 23403                                                      | 23428 | 22847 | 23794 | CDS product ribonucleotide reductase subunit 2 | 23403-23428 5:02:01              |
| CCTCCACGTAGCCCGCGCGCGCCACC                                 |       |       |       |                                                |                                  |
| 23571                                                      | 23590 | 22847 | 23794 | CDS product ribonucleotide reductase subunit 2 | 23571-23590 4:01:01              |
| GGTCATCGGCGGCCGAGAGG                                       |       |       |       |                                                |                                  |
| 23627                                                      | 23647 | 22847 | 23794 | CDS product ribonucleotide reductase subunit 2 | 23627-23647 4:01:01              |
| CCGCTGAGCCGCGCCACGTCC                                      |       |       |       |                                                |                                  |
| 24018                                                      | 24056 | 23814 | 26216 | CDS product ribonucleotide reductase subunit 1 | 24018-24056 6:03:01              |
| GGGGCGGGTCGGCGCAGAGGTCGATCAGGCGCTCCTGG                     |       |       |       |                                                |                                  |
| 24083                                                      | 24107 | 23814 | 26216 | CDS product ribonucleotide reductase subunit 1 | 24083-24107 4:01:01              |
| GGCCAGCGGGTGCCCGGGCGCGAGG                                  |       |       |       |                                                |                                  |
| 24285                                                      | 24305 | 23814 | 26216 | CDS product ribonucleotide reductase subunit 1 | 24285-24305 4:01:01              |
| CCCTCGCTGCCCTCCGTCACC                                      |       |       |       |                                                |                                  |
| 24314                                                      | 24333 | 23814 | 26216 | CDS product ribonucleotide reductase subunit 1 | 24314-24333 4:01:01              |
| GGACACGGTCGGCATGAGGG                                       |       |       |       |                                                |                                  |
| 24506                                                      | 24543 | 23814 | 26216 | CDS product ribonucleotide reductase subunit 1 | 24506-24543 7:04:01              |



|                                           |       |       |       |                                                |                                    |
|-------------------------------------------|-------|-------|-------|------------------------------------------------|------------------------------------|
| GGCGCTGGTGGCCATGACGGCCAGGAGCAGGCGCTCGG    |       |       |       |                                                |                                    |
| 24716                                     | 24747 | 23814 | 26216 | CDS product ribonucleotide reductase subunit 1 | 24716-24747 7:04:01                |
| GGCGGCGGTGGCGGCCCGCGTGGACAGCGCGG          |       |       |       |                                                |                                    |
| 25006                                     | 25035 | 23814 | 26216 | CDS product ribonucleotide reductase subunit 1 | 25006-25035 5:02:01                |
| CCTCGACGCCCAGCCCCCTCGCGCTCCAGCC           |       |       |       |                                                |                                    |
| 25072                                     | 25091 | 23814 | 26216 | CDS product ribonucleotide reductase subunit 1 | 25072-25091 4:01:01                |
| GGCTGAGGTGCGAGGCGCGG                      |       |       |       |                                                |                                    |
| 25132                                     | 25148 | 23814 | 26216 | CDS product ribonucleotide reductase subunit 1 | 25132-25148 4:01:01                |
| GGTAGCGAGGTAGCGG                          |       |       |       |                                                |                                    |
| 25456                                     | 25469 | 23814 | 26216 | CDS product ribonucleotide reductase subunit 1 | 25456-25469 4:01:01 CCTCCACGGCCTCC |
| 25640                                     | 25665 | 23814 | 26216 | CDS product ribonucleotide reductase subunit 1 | 25640-25665 4:01:01                |
| CCCGAAGGCCGGCTCCCGCATCGTCC                |       |       |       |                                                |                                    |
| 25704                                     | 25726 | 23814 | 26216 | CDS product ribonucleotide reductase subunit 1 | 25704-25726 4:01:01                |
| CCCATGGACTCCAGCGCCCCGCC                   |       |       |       |                                                |                                    |
| 26036                                     | 26079 | 23814 | 26216 | CDS product ribonucleotide reductase subunit 1 | 26036-26079 12:09:03               |
| GGCGCGGGAGGGCTGGGAGGCGGCGGGCGGCGGCGGCACGG |       |       |       |                                                |                                    |
| 26082                                     | 26105 | 23814 | 26216 | CDS product ribonucleotide reductase subunit 1 | 26082-26105 5:02:01                |
| CCGCAGCCCAGCCGCGCCCACTCC                  |       |       |       |                                                |                                    |
| 26138                                     | 26151 | 23814 | 26216 | CDS product ribonucleotide reductase subunit 1 | 26138-26151 4:01:01 GGCCGGGCAGGCGG |
| 26594                                     | 26632 | 26581 | 28014 | CDS product capsid triplex subunit 1           | 26594-26632 8:05:02                |
| CCACCCAGTCCCCGGCCCCCACACCAGGCCCTCGATCC    |       |       |       |                                                |                                    |
| 26744                                     | 26768 | 26581 | 28014 | CDS product capsid triplex subunit 1           | 26744-26768 5:02:01                |
| GGGTGGGCCCGCGGGCGGCGCTCGG                 |       |       |       |                                                |                                    |

|                                                |       |       |       |                                      |
|------------------------------------------------|-------|-------|-------|--------------------------------------|
| 26820                                          | 26841 | 26581 | 28014 | CDS product capsid triplex subunit 1 |
| 26873                                          | 26914 | 26581 | 28014 | CDS product capsid triplex subunit 1 |
| CCGCGGCCCCGTCCGCCCCCGCTCCTCGCCCGCCGTCCCC       |       |       |       |                                      |
| 27114                                          | 27153 | 26581 | 28014 | CDS product capsid triplex subunit 1 |
| GGCCGGCACGTGGGCGGTGGAGCGGGTGTGCGGCCTGG         |       |       |       |                                      |
| 27234                                          | 27256 | 26581 | 28014 | CDS product capsid triplex subunit 1 |
| 27257                                          | 27298 | 26581 | 28014 | CDS product capsid triplex subunit 1 |
| GGTGCGGGAACGCGTGGCAGCGGATCATGGCCTGCAGGCAGG     |       |       |       |                                      |
| 27416                                          | 27439 | 26581 | 28014 | CDS product capsid triplex subunit 1 |
| 27440                                          | 27468 | 26581 | 28014 | CDS product capsid triplex subunit 1 |
| CCCGCAGCCCCCGGGCGCCGCGCCGCC                    |       |       |       |                                      |
| 27528                                          | 27547 | 26581 | 28014 | CDS product capsid triplex subunit 1 |
| 27673                                          | 27698 | 26581 | 28014 | CDS product capsid triplex subunit 1 |
| GGCGAAAGGACGGCGCGCCGGCGGG                      |       |       |       |                                      |
| 27752                                          | 27772 | 26581 | 28014 | CDS product capsid triplex subunit 1 |
| 27808                                          | 27855 | 26581 | 28014 | CDS product capsid triplex subunit 1 |
| CCCCGGGGCGCCCGCCGCGGGCCCCGCTGCCCCAGGAGCCGCCACC |       |       |       |                                      |
| 27873                                          | 27901 | 26581 | 28014 | CDS product capsid triplex subunit 1 |
| GGCGGCCCGCCGCGCGGAAGCGGCGCCGG                  |       |       |       |                                      |
| 27934                                          | 27951 | 26581 | 28014 | CDS product capsid triplex subunit 1 |
| 28342                                          | 28359 | 28300 | 31464 | CDS product tegument protein UL37    |
| 28360                                          | 28376 | 28300 | 31464 | CDS product tegument protein UL37    |
| 28385                                          | 28398 | 28300 | 31464 | CDS product tegument protein UL37    |

|             |          |                          |
|-------------|----------|--------------------------|
| 26820-26841 | 4:01:01  | GGGGCAGCGGTAGGCCGCGCGG   |
| 26873-26914 | 11:08:02 |                          |
| 27114-27153 | 7:04:01  |                          |
| 27234-27256 | 4:01:01  | CCCGCCAGGCACCCAAACGCC    |
| 27257-27298 | 7:04:01  |                          |
| 27416-27439 | 5:02:01  | GGAAGGAAAAGGCCACGAGGGAGG |
| 27440-27468 | 6:03:01  |                          |
| 27528-27547 | 6:03:01  | GGGGGCGCGGTGGCGGCGG      |
| 27673-27698 | 6:03:01  |                          |
| 27752-27772 | 4:01:01  | GGATGGTCACGGTCGCGTCGG    |
| 27808-27855 | 9:06:02  |                          |
| 27873-27901 | 6:03:01  |                          |
| 27934-27951 | 4:01:01  | GGCGACGCGGCGGCCGGG       |
| 28342-28359 | 4:01:01  | GGCTGGACGGCGACGCGG       |
| 28360-28376 | 4:01:01  | CCGCCGACCCGCGGCC         |
| 28385-28398 | 4:01:01  | GGAGGCCAGGCGG            |

28582 28616 28300 31464 CDS product tegument protein UL37  
 CCGCCGCCCTCATGGCCGGCGTCCGGGACCTGGCC  
 28595 28621 28300 31464 CDS product tegument protein UL37  
 28634 28664 28300 31464 CDS product tegument protein UL37  
 GCGCGCGCTGGGCTACCTGGCGGCCGCGCGG  
 28676 28692 28300 31464 CDS product tegument protein UL37  
 28709 28721 28300 31464 CDS product tegument protein UL37  
 28754 28780 28300 31464 CDS product tegument protein UL37  
 28781 28804 28300 31464 CDS product tegument protein UL37  
 28915 28943 28300 31464 CDS product tegument protein UL37  
 GGAAGGTGCCCATGGCTGCCGTGGCGCGG  
 28948 28977 28300 31464 CDS product tegument protein UL37  
 CCGCGGACGCCGCGGCGCCCGCTGGCCC  
 29045 29067 28300 31464 CDS product tegument protein UL37  
 29093 29115 28300 31464 CDS product tegument protein UL37  
 29289 29337 28300 31464 CDS product tegument protein UL37  
 GCGCGGTGGCGCGGCTGCTGGAGCGCGGGCGCGGACGCGGGCAGGG  
 29351 29397 28300 31464 CDS product tegument protein UL37  
 GGCGGCGGCCCTGGCGCGGGTCGCGGAGCACGCGGCGGCCGTCTGGG  
 29423 29456 28300 31464 CDS product tegument protein UL37  
 GGACCAGCCCGTGGAGACGCTGGCCGCGGCGGGG  
 29513 29535 28300 31464 CDS product tegument protein UL37  
 29552 29581 28300 31464 CDS product tegument protein UL37

28582-28616 7:04:01  
 28595-28621 5:02:01 GGCCGGCGTCCGGGACCTGGCCAACGG  
 28634-28664 5:02:01  
 28676-28692 4:01:01 GCGGCGTTCCGCCCCG  
 28709-28721 4:01:01 GGTGGTGGAGTGG  
 28754-28780 4:01:01 GGACGCGCGTGCCTGGGCGTGCTGGG  
 28781-28804 4:01:01 CCCCAGCCCCGCGCCCCGCTCGCC  
 28915-28943 5:02:01  
 28948-28977 5:02:01  
 29045-29067 5:02:01 GGGGCTGGCGGAGGCCTTCGCGG  
 29093-29115 4:01:01 GGCGCTGGTGCCCGTGGGCGAGG  
 29289-29337 9:06:02  
 29351-29397 9:06:02  
 29423-29456 6:03:01  
 29513-29535 4:01:01 CCCGAGCCGCGGCCGCGCGCC  
 29552-29581 8:05:02

|                                                       |       |       |       |                                   |                                                |
|-------------------------------------------------------|-------|-------|-------|-----------------------------------|------------------------------------------------|
| GGCGGTGGGCTGCGTGGCGGTGGCGGGCGG                        |       |       |       |                                   |                                                |
| 29780                                                 | 29824 | 28300 | 31464 | CDS product tegument protein UL37 | 29780-29824 7:04:01                            |
| GGCACTCGTGCCGAGGCCGCGCGCGGACAAGCGGGCCGCGG             |       |       |       |                                   |                                                |
| 29836                                                 | 29892 | 28300 | 31464 | CDS product tegument protein UL37 | 29836-29892 13:10:03                           |
| GGGCGGCCGCGAGGGCGGCGGCGGACCGGGCAGAGGCGGCGGCGCCGCTAGGG |       |       |       |                                   |                                                |
| 29956                                                 | 29969 | 28300 | 31464 | CDS product tegument protein UL37 | 29956-29969 4:01:01 CCCCCCGCGGCC               |
| 30096                                                 | 30146 | 28300 | 31464 | CDS product tegument protein UL37 | 30096-30146 8:05:02                            |
| CCCCTGCCGTCCTGCGGGACCGGCCTTCGCGCCCTACTTCGCCGCTGCC     |       |       |       |                                   |                                                |
| 30229                                                 | 30278 | 28300 | 31464 | CDS product tegument protein UL37 | 30229-30278 9:06:02                            |
| GGGCGCGGACTGCGGTGCCGGGCGGTGGCCAACGTGGACGGCTACCGG      |       |       |       |                                   |                                                |
| 30290                                                 | 30311 | 28300 | 31464 | CDS product tegument protein UL37 | 30290-30311 5:02:01 GGCCCTGGCGGCCGGGCTCTGG     |
| 30392                                                 | 30411 | 28300 | 31464 | CDS product tegument protein UL37 | 30392-30411 5:02:01 GGCGCCGTGGCCGCGGCGG        |
| 30434                                                 | 30454 | 28300 | 31464 | CDS product tegument protein UL37 | 30434-30454 4:01:01 CCCGCCGTGCCGCGCGCCC        |
| 30547                                                 | 30581 | 28300 | 31464 | CDS product tegument protein UL37 | 30547-30581 7:04:01                            |
| CCGCCTCCATGGCCGCGGCCGTGGGCGCCGTCGCC                   |       |       |       |                                   |                                                |
| 30582                                                 | 30603 | 28300 | 31464 | CDS product tegument protein UL37 | 30582-30603 6:03:01 GGCGCGGTGGCGGGCTGGGGG      |
| 30650                                                 | 30670 | 28300 | 31464 | CDS product tegument protein UL37 | 30650-30670 4:01:01 GGCGGTGTACGCGCGCGTGG       |
| 30686                                                 | 30727 | 28300 | 31464 | CDS product tegument protein UL37 | 30686-30727 7:04:01                            |
| GGGCACGTGGCGCTCGGCGGACCTGGCCGACGCGGTGCGCGG            |       |       |       |                                   |                                                |
| 30812                                                 | 30837 | 28300 | 31464 | CDS product tegument protein UL37 | 30812-30837 4:01:01 GGCGCTGCAGGAGTGCAGAGCCGCGG |
| 30832                                                 | 30850 | 28300 | 31464 | CDS product tegument protein UL37 | 30832-30850 4:01:01 CCGCGGACGCCGCCCGCC         |
| 30852                                                 | 30864 | 28300 | 31464 | CDS product tegument protein UL37 | 30852-30864 4:01:01 GGCGGCGGGCTGG              |
| 30887                                                 | 30940 | 28300 | 31464 | CDS product tegument protein UL37 | 30887-30940 9:06:02                            |

|                                                                       |       |       |       |                                    |                                               |
|-----------------------------------------------------------------------|-------|-------|-------|------------------------------------|-----------------------------------------------|
| GGCGGGCCACTCGGCGCTGGTGGGGCGCAGACGGCGCTGGCGCTGGCCGCCGG                 |       |       |       |                                    |                                               |
| 30950                                                                 | 30971 | 28300 | 31464 | CDS product tegument protein UL37  | 30950-30971 5:02:01 GGCGGGCGCGGAGGCGCCGGG     |
| 31081                                                                 | 31113 | 28300 | 31464 | CDS product tegument protein UL37  | 31081-31113 6:03:01                           |
| GGCTCCGCGGCGTCTGGGACGAGGTCCAGGAGG                                     |       |       |       |                                    |                                               |
| 31124                                                                 | 31140 | 28300 | 31464 | CDS product tegument protein UL37  | 31124-31140 4:01:01 GGCGGCCCCGGGGCCGG         |
| 31172                                                                 | 31242 | 28300 | 31464 | CDS product tegument protein UL37  | 31172-31242 11:08:02                          |
| GGAGGCGGTGCTGGCGCTGCTGGAGGGCTACTCGGAAGTCCAGGGCGACGAGGGAGCCCGGCGCTCTTG |       |       |       |                                    |                                               |
| 31253                                                                 | 31285 | 28300 | 31464 | CDS product tegument protein UL37  | 31253-31285 6:03:01                           |
| GGACGTGGCCGACTGGGCGGGCGTGACCGCGG                                      |       |       |       |                                    |                                               |
| 31320                                                                 | 31339 | 28300 | 31464 | CDS product tegument protein UL37  | 31320-31339 5:02:01 GGCGGCAACGGCGACGGCGG      |
| 31349                                                                 | 31382 | 28300 | 31464 | CDS product tegument protein UL37  | 31349-31382 9:06:02                           |
| GGCGGCGGGGCGGACGCGGCGGGGGCCGTGG                                       |       |       |       |                                    |                                               |
| 31649                                                                 | 31674 | 31564 | 41178 | CDS product large tegument protein | 31649-31674 5:02:01 GGCGCTAGGGCCGGGACGCGGTTGG |
| 31705                                                                 | 31723 | 31564 | 41178 | CDS product large tegument protein | 31705-31723 4:01:01 GGCTGGCCTTCGCGGGCGG       |
| 31769                                                                 | 31785 | 31564 | 41178 | CDS product large tegument protein | 31769-31785 4:01:01 GGAGGGCGCGGCGTGGG         |
| 31829                                                                 | 31851 | 31564 | 41178 | CDS product large tegument protein | 31829-31851 5:02:01 CCTGCCCAACCGCATCGCCGACC   |
| 31852                                                                 | 31871 | 31564 | 41178 | CDS product large tegument protein | 31852-31871 4:01:01 GGCGGACGCGGACAGCGGG       |
| 32003                                                                 | 32035 | 31564 | 41178 | CDS product large tegument protein | 32003-32035 5:02:01                           |
| GGCGCTGGTGATCGTGGGCGCCATGGGCGTGGG                                     |       |       |       |                                    |                                               |
| 32176                                                                 | 32193 | 31564 | 41178 | CDS product large tegument protein | 32176-32193 4:01:01 GGTGGGCGGGCGCGCTGG        |
| 32360                                                                 | 32397 | 31564 | 41178 | CDS product large tegument protein | 32360-32397 8:05:02                           |
| GGCCGTGGCGGTGGGCGGCGCGGGGCGGAGTGCGAGG                                 |       |       |       |                                    |                                               |
| 32414                                                                 | 32446 | 31564 | 41178 | CDS product large tegument protein | 32414-32446 6:03:01                           |

|                                                 |       |       |       |                                    |                                                 |
|-------------------------------------------------|-------|-------|-------|------------------------------------|-------------------------------------------------|
| CCCGGGCTCGCCGGCGCTGCCGCCCGCCGAGCC               |       |       |       |                                    |                                                 |
| 32474                                           | 32507 | 31564 | 41178 | CDS product large tegument protein | 32474-32507 6:03:01                             |
| GGCCGCGGCCGCGGCCCGCGCGGGAAAGCGG                 |       |       |       |                                    |                                                 |
| 32521                                           | 32540 | 31564 | 41178 | CDS product large tegument protein | 32521-32540 5:02:01 GGCGGCGCGGGCCCCGTGG         |
| 32533                                           | 32565 | 31564 | 41178 | CDS product large tegument protein | 32533-32565 5:02:01                             |
| CCCCGTGGACGCCGCCCTCGAGCCGCGAGGACC               |       |       |       |                                    |                                                 |
| 32608                                           | 32634 | 31564 | 41178 | CDS product large tegument protein | 32608-32634 6:03:01 GGAAGGTCCGGGGCGCGGAGTCGGCGG |
| 32643                                           | 32682 | 31564 | 41178 | CDS product large tegument protein | 32643-32682 9:06:02                             |
| GGGGAGGGCTGGGGAGGGGCGGGGTGGGAGCGGGAGAGG         |       |       |       |                                    |                                                 |
| 32686                                           | 32711 | 31564 | 41178 | CDS product large tegument protein | 32686-32711 6:03:01 CCGCCCTGGCGCCCCGACCGCCGCC   |
| 32717                                           | 32736 | 31564 | 41178 | CDS product large tegument protein | 32717-32736 5:02:01 GGGCGCCGGGCGGGGGAGG         |
| 32747                                           | 32767 | 31564 | 41178 | CDS product large tegument protein | 32747-32767 4:01:01 GGCTGCGCGCGGAGCTTGG         |
| 32792                                           | 32823 | 31564 | 41178 | CDS product large tegument protein | 32792-32823 6:03:01                             |
| GGCCCTGGAGGGCGTCCGGGCGCACGCGGCGG                |       |       |       |                                    |                                                 |
| 32988                                           | 33004 | 31564 | 41178 | CDS product large tegument protein | 32988-33004 4:01:01 CCCTCGGCCGTCCAGCC           |
| 33012                                           | 33027 | 31564 | 41178 | CDS product large tegument protein | 33012-33027 4:01:01 GGGGCGGTGGCCCAGG            |
| 33072                                           | 33093 | 31564 | 41178 | CDS product large tegument protein | 33072-33093 4:01:01 GGGATGGTGCTCGAGGGGCTGG      |
| 33106                                           | 33117 | 31564 | 41178 | CDS product large tegument protein | 33106-33117 4:01:01 GGCTGGCGGAGG                |
| 33181                                           | 33197 | 31564 | 41178 | CDS product large tegument protein | 33181-33197 4:01:01 CCGCCGTGCGGCCGCC            |
| 33221                                           | 33271 | 31564 | 41178 | CDS product large tegument protein | 33221-33271 10:07:02                            |
| GGACGAGCTGGAGGGCGAGGTGGACGGCGCCCGCGGCGGCGACGCGG |       |       |       |                                    |                                                 |
| 33317                                           | 33333 | 31564 | 41178 | CDS product large tegument protein | 33317-33333 4:01:01 CCTCTGGCCTCCGGCC            |
| 33323                                           | 33338 | 31564 | 41178 | CDS product large tegument protein | 33323-33338 4:01:01 GGCCTCCGGCCGCGG             |

|                                                                           |       |       |       |                                    |                                                |
|---------------------------------------------------------------------------|-------|-------|-------|------------------------------------|------------------------------------------------|
| 33415                                                                     | 33443 | 31564 | 41178 | CDS product large tegument protein | 33415-33443 5:02:01                            |
| CCTGCGAGGCCCGCGCAGCCGCCGAGACC                                             |       |       |       |                                    |                                                |
| 33467                                                                     | 33483 | 31564 | 41178 | CDS product large tegument protein | 33467-33483 4:01:01 GGCCTGGAGGGCACGG           |
| 33503                                                                     | 33529 | 31564 | 41178 | CDS product large tegument protein | 33503-33529 5:02:01 CCTGGACGCCGTCCGCCCGACACCC  |
| 33536                                                                     | 33570 | 31564 | 41178 | CDS product large tegument protein | 33536-33570 7:04:01                            |
| GGCGCCCGCGGACGGCGCGGTGGCCGACCTGGCGG                                       |       |       |       |                                    |                                                |
| 33613                                                                     | 33629 | 31564 | 41178 | CDS product large tegument protein | 33613-33629 5:02:01 CCGCCGCCCTGTCCGCC          |
| 33794                                                                     | 33817 | 31564 | 41178 | CDS product large tegument protein | 33794-33817 6:03:01 GCGGCGCGGGTGGCCCGGCTTGG    |
| 33822                                                                     | 33850 | 31564 | 41178 | CDS product large tegument protein | 33822-33850 7:04:01                            |
| CCGCCCCGGCGGCCGCCGCCGCCGCCGCC                                             |       |       |       |                                    |                                                |
| 33890                                                                     | 33906 | 31564 | 41178 | CDS product large tegument protein | 33890-33906 4:01:01 GCGGCGGGCGCAACGG           |
| 33921                                                                     | 33939 | 31564 | 41178 | CDS product large tegument protein | 33921-33939 4:01:01 GGCTCGCGGCCTGGGTGG         |
| 33953                                                                     | 33967 | 31564 | 41178 | CDS product large tegument protein | 33953-33967 4:01:01 GGCGCAGGCGGAGGG            |
| 34023                                                                     | 34062 | 31564 | 41178 | CDS product large tegument protein | 34023-34062 6:03:01                            |
| GGGCGCTCGGCTCGCGGGCGTCGCTGGAGGCTAGCATGG                                   |       |       |       |                                    |                                                |
| 34081                                                                     | 34112 | 31564 | 41178 | CDS product large tegument protein | 34081-34112 8:05:02                            |
| CCGCCCGCGCTCCCGCGCTGCCGCCGCGGCC                                           |       |       |       |                                    |                                                |
| 34128                                                                     | 34191 | 31564 | 41178 | CDS product large tegument protein | 34128-34191 14:11:03                           |
| GGCGCGGGCGGGCGGCACGGGGCCCCTGGGCCCCGGGGCCGAGGAGCGGCGGATGCCGCGG             |       |       |       |                                    |                                                |
| 34186                                                                     | 34211 | 31564 | 41178 | CDS product large tegument protein | 34186-34211 5:02:01 CCGCGGACGCCCGCTCCGCGGCGCC  |
| 34232                                                                     | 34257 | 31564 | 41178 | CDS product large tegument protein | 34232-34257 5:02:01 GGACGCCCTGGCGACGGGCGGCGCGG |
| 34283                                                                     | 34362 | 31564 | 41178 | CDS product large tegument protein | 34283-34362 15:12:03                           |
| GGCCGCGGCCCGCGCGGAGCTGGAGGCGCAGCGGCCGCGCGGCGCGCGCGCGGAGCTGGGGAGCGGCGCGCGG |       |       |       |                                    |                                                |

|                                                                                        |       |       |       |                                    |             |          |                            |
|----------------------------------------------------------------------------------------|-------|-------|-------|------------------------------------|-------------|----------|----------------------------|
| 34424                                                                                  | 34445 | 31564 | 41178 | CDS product large tegument protein | 34424-34445 | 4:01:01  | GGCACCCGGCGCGCTGGAGCGG     |
| 34454                                                                                  | 34479 | 31564 | 41178 | CDS product large tegument protein | 34454-34479 | 6:03:01  | GGACGCGGGCGCGCGGACGGCGGAGG |
| 34523                                                                                  | 34544 | 31564 | 41178 | CDS product large tegument protein | 34523-34544 | 4:01:01  | GGGCGTGCAGGACCGGCTGTGG     |
| 34568                                                                                  | 34642 | 31564 | 41178 | CDS product large tegument protein | 34568-34642 | 13:10:03 |                            |
| GGCGCTGGAGAACCCGGGCGCGCTGGCGCCGGGGCGCTGGCCGGGCTGGGCCCGGCCTTCGCGGCGGTGCTGGG             |       |       |       |                                    |             |          |                            |
| 34652                                                                                  | 34674 | 31564 | 41178 | CDS product large tegument protein | 34652-34674 | 4:01:01  | GGGACAGGCGCTGGGCCCTGCGG    |
| 34730                                                                                  | 34755 | 31564 | 41178 | CDS product large tegument protein | 34730-34755 | 5:02:01  | GGCGGCGGAGCCCGCGGCGCCCGCGG |
| 34740                                                                                  | 34763 | 31564 | 41178 | CDS product large tegument protein | 34740-34763 | 5:02:01  | CCCGCGGCGCCCGCGGCCCGCGC    |
| 34790                                                                                  | 34820 | 31564 | 41178 | CDS product large tegument protein | 34790-34820 | 6:03:01  |                            |
| GGCGGAGGCGCTGCGGGCCAGGGCGCGGGG                                                         |       |       |       |                                    |             |          |                            |
| 34823                                                                                  | 34842 | 31564 | 41178 | CDS product large tegument protein | 34823-34842 | 4:01:01  | CCCGCCGAGTTCGCCTTCC        |
| 34890                                                                                  | 34906 | 31564 | 41178 | CDS product large tegument protein | 34890-34906 | 4:01:01  | GGCGCGGCGGCTGGG            |
| 34919                                                                                  | 34939 | 31564 | 41178 | CDS product large tegument protein | 34919-34939 | 4:01:01  | GGCCGTGGGCGAGGCCTCGGG      |
| 34979                                                                                  | 35070 | 31564 | 41178 | CDS product large tegument protein | 34979-35070 | 18:15:04 |                            |
| GGCGGCGGGCGCGGACGCGGCGGAGACGGCGGCAGCGACGCGCGGACGCGGCGCTGGGCGCGCGGAGGAGGTGCTGCGGGCCGCGG |       |       |       |                                    |             |          |                            |
| 35081                                                                                  | 35124 | 31564 | 41178 | CDS product large tegument protein | 35081-35124 | 9:06:02  |                            |
| GGCCGAGGCCGCTGGCGGCGAGGACGCGGAAGGCGCGGGCGAGG                                           |       |       |       |                                    |             |          |                            |
| 35135                                                                                  | 35148 | 31564 | 41178 | CDS product large tegument protein | 35135-35148 | 4:01:01  | GGACGGCGAGGCGG             |
| 35152                                                                                  | 35170 | 31564 | 41178 | CDS product large tegument protein | 35152-35170 | 4:01:01  | CCGCCGGGCGCCTGGGGCC        |
| 35157                                                                                  | 35178 | 31564 | 41178 | CDS product large tegument protein | 35157-35178 | 4:01:01  | GGGCGCCTGGGGCCGAGGCGG      |
| 35204                                                                                  | 35225 | 31564 | 41178 | CDS product large tegument protein | 35204-35225 | 5:02:01  | GGCCCAGGCGCTGGCGCGGCGG     |
| 35240                                                                                  | 35261 | 31564 | 41178 | CDS product large tegument protein | 35240-35261 | 4:01:01  | CCGGCGCCTGCGCGCCGAGGCC     |
| 35293                                                                                  | 35316 | 31564 | 41178 | CDS product large tegument protein | 35293-35316 | 5:02:01  | GGCAGGAGGAGCGCTGGCGCGAGG   |



|                                                      |       |       |       |                                    |             |                                   |
|------------------------------------------------------|-------|-------|-------|------------------------------------|-------------|-----------------------------------|
| 35419                                                | 35454 | 31564 | 41178 | CDS product large tegument protein | 35419-35454 | 7:04:01                           |
| GGCCGCTGGCGCGGCAGGCCGACGGGGCGCTGGAGG                 |       |       |       |                                    |             |                                   |
| 35467                                                | 35487 | 31564 | 41178 | CDS product large tegument protein | 35467-35487 | 4:01:01 GGGCGACGGCGGCCATCGAGG     |
| 35684                                                | 35698 | 31564 | 41178 | CDS product large tegument protein | 35684-35698 | 4:01:01 GGCTCGGGCGGCGG            |
| 35732                                                | 35748 | 31564 | 41178 | CDS product large tegument protein | 35732-35748 | 4:01:01 GGAGGGCGACCTGGCGG         |
| 35741                                                | 35765 | 31564 | 41178 | CDS product large tegument protein | 35741-35765 | 4:01:01 CCTGGCGGCCGTGCCCCGGCTCGCC |
| 35788                                                | 35811 | 31564 | 41178 | CDS product large tegument protein | 35788-35811 | 5:02:01 GGGGCGACGCGGCTTTCGAGGAGG  |
| 35852                                                | 35874 | 31564 | 41178 | CDS product large tegument protein | 35852-35874 | 6:03:01 GGCGGCCGGCGGGCGCGGCGG     |
| 36014                                                | 36038 | 31564 | 41178 | CDS product large tegument protein | 36014-36038 | 4:01:01 CCACGCCCGCTTCGCCGCTCGGCC  |
| 36077                                                | 36132 | 31564 | 41178 | CDS product large tegument protein | 36077-36132 | 10:07:02                          |
| GGCCGCGCGCGAGAGGCGCTAGAGGCGGCAAAGCGGCGCGCGGAGGCCACGG |       |       |       |                                    |             |                                   |
| 36153                                                | 36177 | 31564 | 41178 | CDS product large tegument protein | 36153-36177 | 6:03:01 GGCGAGGTCGTGGCGGCCGAGGCGG |
| 36199                                                | 36222 | 31564 | 41178 | CDS product large tegument protein | 36199-36222 | 4:01:01 CCGGGCTGGCCAACCTCAAGAACC  |
| 36269                                                | 36287 | 31564 | 41178 | CDS product large tegument protein | 36269-36287 | 4:01:01 CCGCGCCGCTCGGCGGCC        |
| 36317                                                | 36365 | 31564 | 41178 | CDS product large tegument protein | 36317-36365 | 11:08:02                          |
| GGCGCCGTGGAGGAGGCGCCGAGCTGGACGTGGCCGCGGTGGAGTGG      |       |       |       |                                    |             |                                   |
| 36496                                                | 36540 | 31564 | 41178 | CDS product large tegument protein | 36496-36540 | 10:07:02                          |
| GGCGGCAGCTGGAGTCGGCGGCGGCGGCTGGGACGGCGCGTGGG         |       |       |       |                                    |             |                                   |
| 36584                                                | 36612 | 31564 | 41178 | CDS product large tegument protein | 36584-36612 | 4:01:01                           |
| GGACCACGAGGGCGCCAAGGCGCGCGCG                         |       |       |       |                                    |             |                                   |
| 36623                                                | 36647 | 31564 | 41178 | CDS product large tegument protein | 36623-36647 | 5:02:01 GGCGCCGCGGCGTGGTGCTGGGG   |
| 36693                                                | 36724 | 31564 | 41178 | CDS product large tegument protein | 36693-36724 | 6:03:01                           |
| GGCGCGCTGGACGCGCGGCTGGCGGAGCGCGG                     |       |       |       |                                    |             |                                   |

|                                                                  |       |       |       |                                    |             |          |                         |
|------------------------------------------------------------------|-------|-------|-------|------------------------------------|-------------|----------|-------------------------|
| 36739                                                            | 36761 | 31564 | 41178 | CDS product large tegument protein | 36739-36761 | 4:01:01  | CCTTCCACGAGACCGCGCGCGCC |
| 36800                                                            | 36816 | 31564 | 41178 | CDS product large tegument protein | 36800-36816 | 4:01:01  | GGCGGTGCGCGGCGAGG       |
| 36878                                                            | 36894 | 31564 | 41178 | CDS product large tegument protein | 36878-36894 | 4:01:01  | GGCCTGGGCGGCGCAGG       |
| 36903                                                            | 36924 | 31564 | 41178 | CDS product large tegument protein | 36903-36924 | 4:01:01  | CCCTTCCGGGACCTGCTGGTCC  |
| 36987                                                            | 37008 | 31564 | 41178 | CDS product large tegument protein | 36987-37008 | 5:02:01  | GGCGCGGCCGCGGCTCGGGCGG  |
| 37107                                                            | 37143 | 31564 | 41178 | CDS product large tegument protein | 37107-37143 | 7:04:01  |                         |
| GGCCGCGTGGCGGCGCTCCTGGGCGACGAGGCGGCGG                            |       |       |       |                                    |             |          |                         |
| 37310                                                            | 37341 | 31564 | 41178 | CDS product large tegument protein | 37310-37341 | 8:05:02  |                         |
| GGACAACGGCGGCGTGGTGGAGGCGGCCTCGG                                 |       |       |       |                                    |             |          |                         |
| 37510                                                            | 37530 | 31564 | 41178 | CDS product large tegument protein | 37510-37530 | 5:02:01  | CCGCCACGCTGCCCCGCCGCC   |
| 37568                                                            | 37636 | 31564 | 41178 | CDS product large tegument protein | 37568-37636 | 14:11:03 |                         |
| GGCCGAGCGGGGCTGCGGCCGTGCGGGCGCCGCTGGGCGGCGGCAGCGGCGGCGAGGGGCGCGG |       |       |       |                                    |             |          |                         |
| 37646                                                            | 37657 | 31564 | 41178 | CDS product large tegument protein | 37646-37657 | 4:01:01  | GGGCGGCGGCGG            |
| 37778                                                            | 37818 | 31564 | 41178 | CDS product large tegument protein | 37778-37818 | 8:05:02  |                         |
| GGACGGTGTCTTGGCCGAGGCGCTCGCGGGCCGGTGGCGG                         |       |       |       |                                    |             |          |                         |
| 37839                                                            | 37897 | 31564 | 41178 | CDS product large tegument protein | 37839-37897 | 13:10:03 |                         |
| GGCGGCGCGCGCGGCGGCCGTGCCGCTGGGCGGCGGGGCGGACGCCGCGGACGG           |       |       |       |                                    |             |          |                         |
| 37909                                                            | 37922 | 31564 | 41178 | CDS product large tegument protein | 37909-37922 | 4:01:01  | CCATCCGCGCCGCC          |
| 37931                                                            | 37952 | 31564 | 41178 | CDS product large tegument protein | 37931-37952 | 5:02:01  | CCCGGGCCGCTCTCCCCGTCC   |
| 38114                                                            | 38136 | 31564 | 41178 | CDS product large tegument protein | 38114-38136 | 4:01:01  | GGTGGACTCGCTGGGCGCGCAGG |
| 38152                                                            | 38169 | 31564 | 41178 | CDS product large tegument protein | 38152-38169 | 4:01:01  | CCTTCTGCGCGCGGCC        |
| 38198                                                            | 38238 | 31564 | 41178 | CDS product large tegument protein | 38198-38238 | 8:05:02  |                         |
| GGGCGGGCCCTCGGAGGACGCGGCGGCGCTGGCCGACGCGG                        |       |       |       |                                    |             |          |                         |

|                                                                                                     |       |       |       |                                    |             |          |                            |
|-----------------------------------------------------------------------------------------------------|-------|-------|-------|------------------------------------|-------------|----------|----------------------------|
| 38230                                                                                               | 38249 | 31564 | 41178 | CDS product large tegument protein | 38230-38249 | 4:01:01  | CCGCAGCGGCCAGCGCCGCC       |
| 38372                                                                                               | 38397 | 31564 | 41178 | CDS product large tegument protein | 38372-38397 | 4:01:01  | GGGCGCGCCGGTCGTCGTGGCCATGG |
| 38479                                                                                               | 38508 | 31564 | 41178 | CDS product large tegument protein | 38479-38508 | 5:02:01  |                            |
| CCGACGCGCTGCCGCGGTGTCCTCGGACC                                                                       |       |       |       |                                    |             |          |                            |
| 38518                                                                                               | 38535 | 31564 | 41178 | CDS product large tegument protein | 38518-38535 | 4:01:01  | GGGGGAGCGGCTGCTGG          |
| 38623                                                                                               | 38637 | 31564 | 41178 | CDS product large tegument protein | 38623-38637 | 4:01:01  | CCGCGCCGCCCTGCC            |
| 38689                                                                                               | 38701 | 31564 | 41178 | CDS product large tegument protein | 38689-38701 | 4:01:01  | CCGCCGCGCCGCC              |
| 38738                                                                                               | 38754 | 31564 | 41178 | CDS product large tegument protein | 38738-38754 | 4:01:01  | CCGGGACCTGCCGAGCC          |
| 38781                                                                                               | 38806 | 31564 | 41178 | CDS product large tegument protein | 38781-38806 | 6:03:01  | CCCCCGCAGCCGACCCCGCGACCC   |
| 38878                                                                                               | 38920 | 31564 | 41178 | CDS product large tegument protein | 38878-38920 | 8:05:02  |                            |
| CCCACCCCCCGTCTTCCGGCACGCCGCGGACCCGTTTC                                                              |       |       |       |                                    |             |          |                            |
| 38929                                                                                               | 38953 | 31564 | 41178 | CDS product large tegument protein | 38929-38953 | 7:04:01  | GGCCGGCGCCGGCGGCGGCAGCGG   |
| 38957                                                                                               | 39062 | 31564 | 41178 | CDS product large tegument protein | 38957-39062 | 18:15:04 |                            |
| CCGCGCGCCAACGCCCCGCGGCGCGGTGCCCCAAGGCCGACCCGCCCCAGCTCCGGCCGCGCCTCCGGCCCCGCGGAGCCCGCCCTCGCCTGGGGGGCC |       |       |       |                                    |             |          |                            |
| 39055                                                                                               | 39075 | 31564 | 41178 | CDS product large tegument protein | 39055-39075 | 5:02:01  | GGGGGCGCAGGAGTGGCTGG       |
| 39118                                                                                               | 39137 | 31564 | 41178 | CDS product large tegument protein | 39118-39137 | 4:01:01  | CCGCCTACTCGCCGAGCCC        |
| 39195                                                                                               | 39230 | 31564 | 41178 | CDS product large tegument protein | 39195-39230 | 7:04:01  |                            |
| CCTGCCCGTACGCCGGCACCTTACCCGCCCGAGCCC                                                                |       |       |       |                                    |             |          |                            |
| 39265                                                                                               | 39284 | 31564 | 41178 | CDS product large tegument protein | 39265-39284 | 5:02:01  | CCGCCTACCGGCCCGGTCC        |
| 39274                                                                                               | 39295 | 31564 | 41178 | CDS product large tegument protein | 39274-39295 | 4:01:01  | GGCCCGGTCCGAGGGGACGG       |
| 39299                                                                                               | 39328 | 31564 | 41178 | CDS product large tegument protein | 39299-39328 | 7:04:01  |                            |
| CCCACCAGAGTCCGCGCCGCCCCACGCC                                                                        |       |       |       |                                    |             |          |                            |
| 39338                                                                                               | 39368 | 31564 | 41178 | CDS product large tegument protein | 39338-39368 | 8:05:02  |                            |

|                                                                                                              |       |       |       |                                    |                                                 |
|--------------------------------------------------------------------------------------------------------------|-------|-------|-------|------------------------------------|-------------------------------------------------|
| CCCGCCAGAGCCCGCGCCACCCCGCCCCC                                                                                |       |       |       |                                    |                                                 |
| 39405                                                                                                        | 39419 | 31564 | 41178 | CDS product large tegument protein | 39405-39419 4:01:01 CCCGCCCCGAGGCC              |
| 39449                                                                                                        | 39472 | 31564 | 41178 | CDS product large tegument protein | 39449-39472 5:02:01 CCGCCTGACGCGCCGCACCGGGCC    |
| 39509                                                                                                        | 39538 | 31564 | 41178 | CDS product large tegument protein | 39509-39538 6:03:01                             |
| CCCGCTGCCCCGCGCCCCCGGCGGCTCC                                                                                 |       |       |       |                                    |                                                 |
| 39548                                                                                                        | 39631 | 31564 | 41178 | CDS product large tegument protein | 39548-39631 17:14:04                            |
| CCCGCCGCCCCGCGCCTTGCCGCCGACGGCCGCGGTGCCGCGCGTCCCCAGCCTCGCCGCCGCGCCCCAGATTCTCC                                |       |       |       |                                    |                                                 |
| 39641                                                                                                        | 39680 | 31564 | 41178 | CDS product large tegument protein | 39641-39680 9:06:02                             |
| CCCGCCGCCCCGCGGTCCCGCCGCCGCGGCCGCCAGTACC                                                                     |       |       |       |                                    |                                                 |
| 39690                                                                                                        | 39722 | 31564 | 41178 | CDS product large tegument protein | 39690-39722 9:06:02                             |
| CCAGCCTCGCCGCCAGCGCCCCCGCCGCTCCC                                                                             |       |       |       |                                    |                                                 |
| 39733                                                                                                        | 39772 | 31564 | 41178 | CDS product large tegument protein | 39733-39772 9:06:02                             |
| CCCCGGGACCGCTCCGCCGCCACCTCCCTCGTTGCCGCC                                                                      |       |       |       |                                    |                                                 |
| 39801                                                                                                        | 39827 | 31564 | 41178 | CDS product large tegument protein | 39801-39827 5:02:01 CCCGGCGCCCAGACGGTCCGCCGGCCC |
| 39815                                                                                                        | 39836 | 31564 | 41178 | CDS product large tegument protein | 39815-39836 4:01:01 GGTCCGCCGCCCCGGGGCTCGG      |
| 39869                                                                                                        | 39892 | 31564 | 41178 | CDS product large tegument protein | 39869-39892 6:03:01 CCCGCCGCCCCCGTTTTGCCGCC     |
| 39899                                                                                                        | 39937 | 31564 | 41178 | CDS product large tegument protein | 39899-39937 8:05:02                             |
| GGGGCGCCGGCGGACGGTCCGCCGGCCGGGGCTCGGG                                                                        |       |       |       |                                    |                                                 |
| 39946                                                                                                        | 40060 | 31564 | 41178 | CDS product large tegument protein | 39946-40060 23:20:05                            |
| CCGGCCGCGCCGCCGAGCCCGCCCGCCCTGCCAGCCGTTAGCCCGCCCGGGCCACCCGCCGTCTCCCCACCGCCCCGAGCCCGCCCAAGCCCGCGGACGCCGGCCCCC |       |       |       |                                    |                                                 |
| 40046                                                                                                        | 40068 | 31564 | 41178 | CDS product large tegument protein | 40046-40068 4:01:01 GGACCCGCCCCCAGGTGCGG        |
| 40071                                                                                                        | 40152 | 31564 | 41178 | CDS product large tegument protein | 40071-40152 18:15:04                            |
| CCCGCGCCGCTCCGCCGCTCCGCCGCTCCGCCGCTCCGCCGCTCCGCCGCGCCACCGAGCCAACCC                                           |       |       |       |                                    |                                                 |

|                                                          |       |       |       |                                    |                      |                            |
|----------------------------------------------------------|-------|-------|-------|------------------------------------|----------------------|----------------------------|
| 40153                                                    | 40178 | 31564 | 41178 | CDS product large tegument protein | 40153-40178 5:02:01  | GGGCGGACGGGCCGGCACCGCCGGGG |
| 40164                                                    | 40183 | 31564 | 41178 | CDS product large tegument protein | 40164-40183 5:02:01  | CCGGCACCGCCGGGGCCGCC       |
| 40206                                                    | 40237 | 31564 | 41178 | CDS product large tegument protein | 40206-40237 6:03:01  |                            |
| CCGGCGGCCCCGGCGCCCCAAGGGCCCCCCC                          |       |       |       |                                    |                      |                            |
| 40253                                                    | 40283 | 31564 | 41178 | CDS product large tegument protein | 40253-40283 6:03:01  |                            |
| CCCGGCGCCGCCGAAGCCCAGACCCGCGCCC                          |       |       |       |                                    |                      |                            |
| 40293                                                    | 40313 | 31564 | 41178 | CDS product large tegument protein | 40293-40313 4:01:01  | CCCGGCGCGCCCGCCAAGCCC      |
| 40391                                                    | 40411 | 31564 | 41178 | CDS product large tegument protein | 40391-40411 4:01:01  | GGGCCCCGGCCCCGCGGACGG      |
| 40448                                                    | 40498 | 31564 | 41178 | CDS product large tegument protein | 40448-40498 11:08:02 |                            |
| CCCGCCACCCGACCCCGCGACCCAGCCGGCCGGCCGCGCCAGCGCTCC         |       |       |       |                                    |                      |                            |
| 40505                                                    | 40536 | 31564 | 41178 | CDS product large tegument protein | 40505-40536 6:03:01  |                            |
| GGCCGCGGCGCTTCCGGCCGCGGCCGCGCCG                          |       |       |       |                                    |                      |                            |
| 40518                                                    | 40576 | 31564 | 41178 | CDS product large tegument protein | 40518-40576 12:09:03 |                            |
| CCGGCCGCGGCCCGGCCGCGCCCGCGACCCAGCCGGCCGGGCCGCGCCAGCGCTCC |       |       |       |                                    |                      |                            |
| 40583                                                    | 40632 | 31564 | 41178 | CDS product large tegument protein | 40583-40632 8:05:02  |                            |
| GGCCGCGGCGCCTCCGGCCGCGGCCCGGCTGGCGCCCCCGGCCAGCCGG        |       |       |       |                                    |                      |                            |
| 40585                                                    | 40608 | 31564 | 41178 | CDS product large tegument protein | 40585-40608 5:02:01  | CCGCGGCGCCTCCGGCCGCGGCCC   |
| 40617                                                    | 40639 | 31564 | 41178 | CDS product large tegument protein | 40617-40639 6:03:01  | CCCCCGGCCAGCCGGCGCCTCC     |
| 40653                                                    | 40669 | 31564 | 41178 | CDS product large tegument protein | 40653-40669 5:02:01  | CCCGCCGCCCCCGCCC           |
| 40673                                                    | 40689 | 31564 | 41178 | CDS product large tegument protein | 40673-40689 4:01:01  | GGATGTGGGCGGCCGGG          |
| 40685                                                    | 40708 | 31564 | 41178 | CDS product large tegument protein | 40685-40708 4:01:01  | CCGGGCGCGCCCGACGGCCCGCC    |
| 40814                                                    | 40832 | 31564 | 41178 | CDS product large tegument protein | 40814-40832 4:01:01  | GGCGGACGCCGAGGCGCGG        |
| 40845                                                    | 40889 | 31564 | 41178 | CDS product large tegument protein | 40845-40889 9:06:02  |                            |

|                                                      |       |       |       |                                             |                                         |
|------------------------------------------------------|-------|-------|-------|---------------------------------------------|-----------------------------------------|
| CCCGCGCCCCCGAGCCCCCGTCGACCCCGCCTCGACACCGCC           |       |       |       |                                             |                                         |
| 40916                                                | 40947 | 31564 | 41178 | CDS product large tegument protein          | 40916-40947 7:04:01                     |
| GGAGACGGAGACGGAGGCGGAAGAGACGGAGG                     |       |       |       |                                             |                                         |
| 40956                                                | 40974 | 31564 | 41178 | CDS product large tegument protein          | 40956-40974 4:01:01 GGCCGCGCCCCAGGCCGGG |
| 41418                                                | 41436 | 41405 | 41782 | CDS product small capsid protein            | 41418-41436 4:01:01 CCGAGGCCGAAGCCGCGCC |
| 41664                                                | 41681 | 41405 | 41782 | CDS product small capsid protein            | 41664-41681 4:01:01 GGAGCGGGCGGGACGCGG  |
| 41707                                                | 41758 | 41405 | 41782 | CDS product small capsid protein            | 41707-41758 9:06:02                     |
| GGGCAGCAGGTCCCGTAGGGTGTGCGGGGTGATGGTGGCCGGCGCGCTGGGG |       |       |       |                                             |                                         |
| 41866                                                | 41911 | 41827 | 42657 | CDS product nuclear egress membrane protein | 41866-41911 8:05:02                     |
| CCAAAGACTCCGCCCACAAGCGCCGCGAGGACCGCGAGCCCCCGCC       |       |       |       |                                             |                                         |
| 41948                                                | 41977 | 41827 | 42657 | CDS product nuclear egress membrane protein | 41948-41977 7:04:01                     |
| GGCTCCCGGCGCCCCGGCGGCGGCGGCGG                        |       |       |       |                                             |                                         |
| 42079                                                | 42116 | 41827 | 42657 | CDS product nuclear egress membrane protein | 42079-42116 7:04:01                     |
| CCCAGCCGCTCCTGGACCGCGCGGTCCAGCAGCCGGCC               |       |       |       |                                             |                                         |
| 42201                                                | 42219 | 41827 | 42657 | CDS product nuclear egress membrane protein | 42201-42219 4:01:01 GGCGCGGAATGGCCGCGGG |
| 42410                                                | 42436 | 41827 | 42657 | CDS product nuclear egress membrane protein | 42410-42436 4:01:01                     |
| CCGTCTGCGCCCAGCTGGCCATCAGCC                          |       |       |       |                                             |                                         |
| 42507                                                | 42536 | 41827 | 42657 | CDS product nuclear egress membrane protein | 42507-42536 6:03:01                     |
| GGGCGGGCGGCGCGGGTCCCAGGGCTGGGG                       |       |       |       |                                             |                                         |
| 42596                                                | 42622 | 41827 | 42657 | CDS product nuclear egress membrane protein | 42596-42622 5:02:01                     |
| GGCTCCGGGAGGAGCCCTCGGCATCGG                          |       |       |       |                                             |                                         |
| 42799                                                | 42812 | 42738 | 43070 | CDS product DNA packaging protein UL33      | 42799-42812 4:01:01 CCTTCCTCGCCTCC      |
| 42839                                                | 42853 | 42738 | 43070 | CDS product DNA packaging protein UL33      | 42839-42853 4:01:01 CCGCCCCCGGGGCC      |

|                                             |       |       |       |                                        |             |                                  |
|---------------------------------------------|-------|-------|-------|----------------------------------------|-------------|----------------------------------|
| 42865                                       | 42890 | 42738 | 43070 | CDS product DNA packaging protein UL33 | 42865-42890 | 4:01:01                          |
| CCGAGGCCAGGCGCGCCGTGAAGGCC                  |       |       |       |                                        |             |                                  |
| 42905                                       | 42919 | 42738 | 43070 | CDS product DNA packaging protein UL33 | 42905-42919 | 4:01:01 GCGTCGGTGGTGGG           |
| 42946                                       | 42968 | 42738 | 43070 | CDS product DNA packaging protein UL33 | 42946-42968 | 4:01:01 CCACGTCCTCGAACCAGATCTCC  |
| 43009                                       | 43040 | 42738 | 43070 | CDS product DNA packaging protein UL33 | 43009-43040 | 5:02:01                          |
| CCAGCTCGGCCACGTCCTCGGTGGCCAGCGCC            |       |       |       |                                        |             |                                  |
| 43089                                       | 43108 | 43051 | 44847 | CDS product DNA packaging protein UL32 | 43089-43108 | 5:02:01 GCGCCGGCGGCGGCGAGGG      |
| 43120                                       | 43138 | 43051 | 44847 | CDS product DNA packaging protein UL32 | 43120-43138 | 4:01:01 GGGCGGAGGGCGCGTTCGG      |
| 43223                                       | 43242 | 43051 | 44847 | CDS product DNA packaging protein UL32 | 43223-43242 | 4:01:01 GGAGGTGCCCGGCCGCGGG      |
| 43256                                       | 43299 | 43051 | 44847 | CDS product DNA packaging protein UL32 | 43256-43299 | 10:07:02                         |
| GGAGGGGGACGCGGACGCGGACGGGGAGGGGGCGGCGCCGCGG |       |       |       |                                        |             |                                  |
| 43324                                       | 43351 | 43051 | 44847 | CDS product DNA packaging protein UL32 | 43324-43351 | 6:03:01                          |
| CCGCCCGCGCTGGCCATCGACCGGCC                  |       |       |       |                                        |             |                                  |
| 43404                                       | 43427 | 43051 | 44847 | CDS product DNA packaging protein UL32 | 43404-43427 | 4:01:01 CCCCCCTGGGTCGCCGACTACGCC |
| 43455                                       | 43472 | 43051 | 44847 | CDS product DNA packaging protein UL32 | 43455-43472 | 4:01:01 CCGCCCTGCGCCGTGGCC       |
| 43502                                       | 43538 | 43051 | 44847 | CDS product DNA packaging protein UL32 | 43502-43538 | 6:03:01                          |
| CCTGATGGACCGCACTTCCTGGCCGCGCACCGCGCC        |       |       |       |                                        |             |                                  |
| 43622                                       | 43648 | 43051 | 44847 | CDS product DNA packaging protein UL32 | 43622-43648 | 7:04:01                          |
| GGACGGCGGCGTTCCCGGCGGCGGCGG                 |       |       |       |                                        |             |                                  |
| 43659                                       | 43683 | 43051 | 44847 | CDS product DNA packaging protein UL32 | 43659-43683 | 4:01:01                          |
| GGCGCCGCTGGGGGGCGCGCCGGG                    |       |       |       |                                        |             |                                  |
| 43730                                       | 43758 | 43051 | 44847 | CDS product DNA packaging protein UL32 | 43730-43758 | 4:01:01                          |
| GGCGACGGGGCGCTGTTGGCGTCGACGG                |       |       |       |                                        |             |                                  |

|                                                        |       |       |       |                                           |             |          |                       |
|--------------------------------------------------------|-------|-------|-------|-------------------------------------------|-------------|----------|-----------------------|
| 43769                                                  | 43789 | 43051 | 44847 | CDS product DNA packaging protein UL32    | 43769-43789 | 5:02:01  | GGAGGCGGCGCCCGCGGACGG |
| 43887                                                  | 43936 | 43051 | 44847 | CDS product DNA packaging protein UL32    | 43887-43936 | 12:09:03 |                       |
| GGCGGCTGCGGCGGTGGCGGCGCGCGGGCGGCGGCGTCCCGGGG           |       |       |       |                                           |             |          |                       |
| 44022                                                  | 44058 | 43051 | 44847 | CDS product DNA packaging protein UL32    | 44022-44058 | 8:05:02  |                       |
| CCCGCCGGCGCCCCGCCGGCGCCGCCCGCCGCGGACC                  |       |       |       |                                           |             |          |                       |
| 44054                                                  | 44073 | 43051 | 44847 | CDS product DNA packaging protein UL32    | 44054-44073 | 4:01:01  | GGACCGGTGGGCGTACGCGG  |
| 44146                                                  | 44166 | 43051 | 44847 | CDS product DNA packaging protein UL32    | 44146-44166 | 5:02:01  | CCCGCCGCACCGCGTTCGACC |
| 44261                                                  | 44280 | 43051 | 44847 | CDS product DNA packaging protein UL32    | 44261-44280 | 4:01:01  | GGGCGCGGTGCTGGCCACGG  |
| 44457                                                  | 44482 | 43051 | 44847 | CDS product DNA packaging protein UL32    | 44457-44482 | 5:02:01  |                       |
| GGCGCGCCGGTCGAAGGCGACGGCGG                             |       |       |       |                                           |             |          |                       |
| 44726                                                  | 44750 | 43051 | 44847 | CDS product DNA packaging protein UL32    | 44726-44750 | 5:02:01  |                       |
| CCAGCTCTTCCCCCGAAGCCAACC                               |       |       |       |                                           |             |          |                       |
| 44851                                                  | 44884 | 44840 | 45979 | CDS product nuclear egress lamina protein | 44851-44884 | 7:04:01  |                       |
| GGGAGGTGCGGCCGGGCCCGGAGCTGGAGCTGG                      |       |       |       |                                           |             |          |                       |
| 44899                                                  | 44942 | 44840 | 45979 | CDS product nuclear egress lamina protein | 44899-44942 | 7:04:01  |                       |
| CCCACGCCCCGCGCGCGCGGCGACCGACCCCGAGCCCC                 |       |       |       |                                           |             |          |                       |
| 44943                                                  | 44973 | 44840 | 45979 | CDS product nuclear egress lamina protein | 44943-44973 | 6:03:01  |                       |
| GGGCTCGGCCCGGTCCGAGCGGCGGGGCGG                         |       |       |       |                                           |             |          |                       |
| 44984                                                  | 45044 | 44840 | 45979 | CDS product nuclear egress lamina protein | 44984-45044 | 11:08:02 |                       |
| CCCCGCCCGCTCCCGCTCCCGTCCCGTCCCGTCCCGTCCCGTCCCGTTCCTGCC |       |       |       |                                           |             |          |                       |
| 45048                                                  | 45084 | 44840 | 45979 | CDS product nuclear egress lamina protein | 45048-45084 | 7:04:01  |                       |
| GGAGCGGTCCCGGTCCCGGTCCCGGTCCCGGTCCCGG                  |       |       |       |                                           |             |          |                       |
| 45056                                                  | 45088 | 44840 | 45979 | CDS product nuclear egress lamina protein | 45056-45088 | 6:03:01  |                       |



|                                        |       |       |       |                                              |                                           |
|----------------------------------------|-------|-------|-------|----------------------------------------------|-------------------------------------------|
| CCCGGTCCCGGTCCCGGTCCCGGTCCCGGTCCC      |       |       |       |                                              |                                           |
| 45141                                  | 45169 | 44840 | 45979 | CDS product nuclear egress lamina protein    | 45141-45169 4:01:01                       |
| GGGCGCGCGGCGCGCGGGGCGCGCGCGG           |       |       |       |                                              |                                           |
| 45195                                  | 45210 | 44840 | 45979 | CDS product nuclear egress lamina protein    | 45195-45210 5:02:01 CCTGGCCTCCTCCCC       |
| 45360                                  | 45386 | 44840 | 45979 | CDS product nuclear egress lamina protein    | 45360-45386 5:02:01                       |
| CCCCGCCTGCACCGTGACCGGTGGCCC            |       |       |       |                                              |                                           |
| 45379                                  | 45412 | 44840 | 45979 | CDS product nuclear egress lamina protein    | 45379-45412 6:03:01                       |
| GGTGGCCCGCGGATGGGCCGCGGACCGCGCGG       |       |       |       |                                              |                                           |
| 45459                                  | 45481 | 44840 | 45979 | CDS product nuclear egress lamina protein    | 45459-45481 6:03:01                       |
| CCGGGCCTTCCTGGCCTCCATCC                |       |       |       |                                              |                                           |
| 45529                                  | 45548 | 44840 | 45979 | CDS product nuclear egress lamina protein    | 45529-45548 5:02:01 GGCGGCGTCGGGCCCCGGCGG |
| 45569                                  | 45588 | 44840 | 45979 | CDS product nuclear egress lamina protein    | 45569-45588 4:01:01 CCGAGGTCCTGGCCCAGCCC  |
| 45707                                  | 45739 | 44840 | 45979 | CDS product nuclear egress lamina protein    | 45707-45739 8:05:02                       |
| CCATCCACCTGCACCACCGCCTGCTGGACCACC      |       |       |       |                                              |                                           |
| 45804                                  | 45827 | 44840 | 45979 | CDS product nuclear egress lamina protein    | 45804-45827 6:03:01                       |
| GGTGCGCCGGGACGGGGCGGGGG                |       |       |       |                                              |                                           |
| 45846                                  | 45877 | 44840 | 45979 | CDS product nuclear egress lamina protein    | 45846-45877 6:03:01                       |
| GGACGCCGAGGTGCCGCGGTGAGCGCGGGG         |       |       |       |                                              |                                           |
| 46096                                  | 46134 | 45903 | 49655 | CDS product DNA polymerase catalytic subunit | 46096-46134 7:04:01                       |
| GGGCCTTGAAGGTGGCGCCGACGGTGCCAGGAGGTGGG |       |       |       |                                              |                                           |
| 46148                                  | 46170 | 45903 | 49655 | CDS product DNA polymerase catalytic subunit | 46148-46170 4:01:01                       |
| GGTGTGAGGGGCACGGCGCGGG                 |       |       |       |                                              |                                           |
| 46182                                  | 46208 | 45903 | 49655 | CDS product DNA polymerase catalytic subunit | 46182-46208 5:02:01                       |

|                                                  |       |       |       |                                              |                      |
|--------------------------------------------------|-------|-------|-------|----------------------------------------------|----------------------|
| CCCGGGTCCTCGGCCATGTCCGAGACC                      |       |       |       |                                              |                      |
| 46213                                            | 46266 | 45903 | 49655 | CDS product DNA polymerase catalytic subunit | 46213-46266 11:08:02 |
| GGCGCGCGGGCGGGCGGCGGCCGCGCGGCCGCTGGGAGGCGGGCGGGG |       |       |       |                                              |                      |
| 46421                                            | 46442 | 45903 | 49655 | CDS product DNA polymerase catalytic subunit | 46421-46442 5:02:01  |
| GGCGTAGGCCTCGGGCGGGCGG                           |       |       |       |                                              |                      |
| 46485                                            | 46521 | 45903 | 49655 | CDS product DNA polymerase catalytic subunit | 46485-46521 6:03:01  |
| GGGTGCGCGATCTTGCGTGGGCCTCGGCCAGCACGG             |       |       |       |                                              |                      |
| 46553                                            | 46570 | 45903 | 49655 | CDS product DNA polymerase catalytic subunit | 46553-46570 4:01:01  |
| CCGCCCCGGGCCACTCGCC                              |       |       |       |                                              |                      |
| 46571                                            | 46599 | 45903 | 49655 | CDS product DNA polymerase catalytic subunit | 46571-46599 6:03:01  |
| GGGCGGCACGGCTGAGGCCTCGGCCGCGG                    |       |       |       |                                              |                      |
| 46810                                            | 46841 | 45903 | 49655 | CDS product DNA polymerase catalytic subunit | 46810-46841 7:04:01  |
| CCGCCGAGACCTGCCGCGCCATGCCGTCGCC                  |       |       |       |                                              |                      |
| 46888                                            | 46910 | 45903 | 49655 | CDS product DNA polymerase catalytic subunit | 46888-46910 4:01:01  |
| CCGAGTCCGTGTCGCCGTAGACC                          |       |       |       |                                              |                      |
| 46932                                            | 46958 | 45903 | 49655 | CDS product DNA polymerase catalytic subunit | 46932-46958 5:02:01  |
| CCGGCCGCCGACGCGCCTCGGCGGCC                       |       |       |       |                                              |                      |
| 46946                                            | 46964 | 45903 | 49655 | CDS product DNA polymerase catalytic subunit | 46946-46964 4:01:01  |
| GGCCTCGGCGGCCTCGGGG                              |       |       |       |                                              |                      |
| 47045                                            | 47077 | 45903 | 49655 | CDS product DNA polymerase catalytic subunit | 47045-47077 6:03:01  |
| GGTCGTCACGGTGGCCGCGACGCCAGGCAGGG                 |       |       |       |                                              |                      |
| 47085                                            | 47114 | 45903 | 49655 | CDS product DNA polymerase catalytic subunit | 47085-47114 5:02:01  |
| CCGTTGGCCACGCCGGTGAAGCCGTACACC                   |       |       |       |                                              |                      |

|                                                                                                       |       |       |       |                                              |                      |
|-------------------------------------------------------------------------------------------------------|-------|-------|-------|----------------------------------------------|----------------------|
| 47162                                                                                                 | 47186 | 45903 | 49655 | CDS product DNA polymerase catalytic subunit | 47162-47186 5:02:01  |
| GGCCTCCTCGGGCGCGGCGGGG                                                                                |       |       |       |                                              |                      |
| 47311                                                                                                 | 47347 | 45903 | 49655 | CDS product DNA polymerase catalytic subunit | 47311-47347 7:04:01  |
| CCGCGCCGGGCGCCAGCCCCGCGGGGCGGGCCTCGCC                                                                 |       |       |       |                                              |                      |
| 47455                                                                                                 | 47479 | 45903 | 49655 | CDS product DNA polymerase catalytic subunit | 47455-47479 4:01:01  |
| CCAGGACCTTGGCGCCCTGATACCC                                                                             |       |       |       |                                              |                      |
| 47512                                                                                                 | 47620 | 45903 | 49655 | CDS product DNA polymerase catalytic subunit | 47512-47620 23:20:05 |
| CCGCCGCCCCCGCGTCCCTGCGTCTCCCGTCCCCCCTCCGCTCCCGTCATCCTCCCCATCGCCCCCTCCTCGCCCTCGCCGCGGGCCGCGTCGCCCCAGCC |       |       |       |                                              |                      |
| 47602                                                                                                 | 47630 | 45903 | 49655 | CDS product DNA polymerase catalytic subunit | 47602-47630 4:01:01  |
| GGGCCGCGTCGGCCAGCCGGCGAACGGG                                                                          |       |       |       |                                              |                      |
| 47631                                                                                                 | 47654 | 45903 | 49655 | CDS product DNA polymerase catalytic subunit | 47631-47654 4:01:01  |
| CCCCGTCGCTGCCCTCGGCGCCC                                                                               |       |       |       |                                              |                      |
| 47648                                                                                                 | 47684 | 45903 | 49655 | CDS product DNA polymerase catalytic subunit | 47648-47684 5:02:01  |
| GGCGCCCGCGGGGCGCCGCTGGCTGTCCGGCAGCAGG                                                                 |       |       |       |                                              |                      |
| 47698                                                                                                 | 47718 | 45903 | 49655 | CDS product DNA polymerase catalytic subunit | 47698-47718 4:01:01  |
| GGGCCAGGCGCAGCAGGCAGG                                                                                 |       |       |       |                                              |                      |
| 47768                                                                                                 | 47798 | 45903 | 49655 | CDS product DNA polymerase catalytic subunit | 47768-47798 7:04:01  |
| CCCGGCCAGCCGCGCCACCGCCGACAGCTCC                                                                       |       |       |       |                                              |                      |
| 47828                                                                                                 | 47846 | 45903 | 49655 | CDS product DNA polymerase catalytic subunit | 47828-47846 4:01:01  |
| CCCGACCAGCGCCGAGTCC                                                                                   |       |       |       |                                              |                      |
| 47862                                                                                                 | 47891 | 45903 | 49655 | CDS product DNA polymerase catalytic subunit | 47862-47891 6:03:01  |
| CCGATGACCGCGGGCCCTCCGGCCCGGCC                                                                         |       |       |       |                                              |                      |
| 47911                                                                                                 | 47957 | 45903 | 49655 | CDS product DNA polymerase catalytic subunit | 47911-47957 9:06:02  |

CCTTGTAGTCCAGGTCCACCTTCCGCTCCCGCAGGGCCTCCTCGGCC

|                                     |       |       |       |                                              |                     |
|-------------------------------------|-------|-------|-------|----------------------------------------------|---------------------|
| 48278                               | 48300 | 45903 | 49655 | CDS product DNA polymerase catalytic subunit | 48278-48300 5:02:01 |
| GGCGGGCGCGGGAGCCCGGCGG              |       |       |       |                                              |                     |
| 48316                               | 48339 | 45903 | 49655 | CDS product DNA polymerase catalytic subunit | 48316-48339 6:03:01 |
| GGAAGGCCGCGGCAGGTCGCAGG             |       |       |       |                                              |                     |
| 48409                               | 48443 | 45903 | 49655 | CDS product DNA polymerase catalytic subunit | 48409-48443 6:03:01 |
| GGACGACGAGGTCCTCGGCGTTGGCGGCCGCCGGG |       |       |       |                                              |                     |
| 48436                               | 48461 | 45903 | 49655 | CDS product DNA polymerase catalytic subunit | 48436-48461 5:02:01 |
| CCGCCGGGAACGCCAGCCCGTCGCCC          |       |       |       |                                              |                     |
| 48621                               | 48652 | 45903 | 49655 | CDS product DNA polymerase catalytic subunit | 48621-48652 6:03:01 |
| CCAGCGCGCCCGGGCCGAGCCGGTACCAGCC     |       |       |       |                                              |                     |
| 48823                               | 48839 | 45903 | 49655 | CDS product DNA polymerase catalytic subunit | 48823-48839 4:01:01 |
| CCGCCGCGCTAACCACC                   |       |       |       |                                              |                     |
| 48870                               | 48891 | 45903 | 49655 | CDS product DNA polymerase catalytic subunit | 48870-48891 4:01:01 |
| CCCAGGTAGCCGACGCCGGGCC              |       |       |       |                                              |                     |
| 48900                               | 48923 | 45903 | 49655 | CDS product DNA polymerase catalytic subunit | 48900-48923 7:04:01 |
| CCGCCGCCCCCGCCCGGCGTCC              |       |       |       |                                              |                     |
| 48932                               | 48954 | 45903 | 49655 | CDS product DNA polymerase catalytic subunit | 48932-48954 5:02:01 |
| GGCGCCGGCGCCAGGGCCGAGG              |       |       |       |                                              |                     |
| 48964                               | 48992 | 45903 | 49655 | CDS product DNA polymerase catalytic subunit | 48964-48992 6:03:01 |
| CCGCCACCATGGCGTCCACCAGCTGGCCC       |       |       |       |                                              |                     |
| 49010                               | 49026 | 45903 | 49655 | CDS product DNA polymerase catalytic subunit | 49010-49026 4:01:01 |
| GGCCAGGTCAACGGCGG                   |       |       |       |                                              |                     |

|                                            |       |       |       |                                                 |                     |
|--------------------------------------------|-------|-------|-------|-------------------------------------------------|---------------------|
| 49083                                      | 49100 | 45903 | 49655 | CDS product DNA polymerase catalytic subunit    | 49083-49100 4:01:01 |
| CCGTCCTCCGACATGCCC                         |       |       |       |                                                 |                     |
| 49114                                      | 49136 | 45903 | 49655 | CDS product DNA polymerase catalytic subunit    | 49114-49136 5:02:01 |
| CCGTGGCGCCGCCGGCCGGGCC                     |       |       |       |                                                 |                     |
| 49118                                      | 49152 | 45903 | 49655 | CDS product DNA polymerase catalytic subunit    | 49118-49152 6:03:01 |
| GGCGCCGCCGGGCCGGGCTCGGCGGCGAAGCGGG         |       |       |       |                                                 |                     |
| 49387                                      | 49415 | 45903 | 49655 | CDS product DNA polymerase catalytic subunit    | 49387-49415 8:05:02 |
| CCGCCAGCCTTGACGCTCCCCCTCCCCC               |       |       |       |                                                 |                     |
| 49471                                      | 49488 | 45903 | 49655 | CDS product DNA polymerase catalytic subunit    | 49471-49488 5:02:01 |
| GGAAGGAGGACACGGCGG                         |       |       |       |                                                 |                     |
| 49515                                      | 49559 | 45903 | 49655 | CDS product DNA polymerase catalytic subunit    | 49515-49559 8:05:02 |
| CCGGCGCGGCCCGCCTCGCCGGCGCCGGCGTCGCCCCGGCCC |       |       |       |                                                 |                     |
| 49555                                      | 49575 | 45903 | 49655 | CDS product DNA polymerase catalytic subunit    | 49555-49575 4:01:01 |
| GGCCCCGGCTGCGCGGCCGGGG                     |       |       |       |                                                 |                     |
| 50121                                      | 50141 | 49926 | 53552 | CDS product single-stranded DNA-binding protein | 50121-50141 5:02:01 |
| CCGGCACCAAGACCACCGGCC                      |       |       |       |                                                 |                     |
| 50138                                      | 50162 | 49926 | 53552 | CDS product single-stranded DNA-binding protein | 50138-50162 5:02:01 |
| GGCCTGGGCGGCGCGGGGCTGACGG                  |       |       |       |                                                 |                     |
| 50174                                      | 50190 | 49926 | 53552 | CDS product single-stranded DNA-binding protein | 50174-50190 4:01:01 |
| CCCAGCCACTACCACCC                          |       |       |       |                                                 |                     |
| 50221                                      | 50249 | 49926 | 53552 | CDS product single-stranded DNA-binding protein | 50221-50249 5:02:01 |
| CCTGCGCGCCAGCACGGCCGCGCCGAACC              |       |       |       |                                                 |                     |
| 50269                                      | 50292 | 49926 | 53552 | CDS product single-stranded DNA-binding protein | 50269-50292 5:02:01 |

|                                          |       |       |       |                                                 |                     |
|------------------------------------------|-------|-------|-------|-------------------------------------------------|---------------------|
| GGCGCGGCGGCTTCGGCTTCGG                   |       |       |       |                                                 |                     |
| 50368                                    | 50407 | 49926 | 53552 | CDS product single-stranded DNA-binding protein | 50368-50407 5:02:01 |
| CCCCGAGACGGCCCTGCTCTTCCTCGCGACCACGGAGGCC |       |       |       |                                                 |                     |
| 50401                                    | 50420 | 49926 | 53552 | CDS product single-stranded DNA-binding protein | 50401-50420 4:01:01 |
| GGAGGCCTTCAAGGAGACGG                     |       |       |       |                                                 |                     |
| 50650                                    | 50666 | 49926 | 53552 | CDS product single-stranded DNA-binding protein | 50650-50666 4:01:01 |
| GGGCCCCGGCCGCGGTGG                       |       |       |       |                                                 |                     |
| 50686                                    | 50705 | 49926 | 53552 | CDS product single-stranded DNA-binding protein | 50686-50705 4:01:01 |
| GGACGCGGTGGCGCGCGGG                      |       |       |       |                                                 |                     |
| 50795                                    | 50815 | 49926 | 53552 | CDS product single-stranded DNA-binding protein | 50795-50815 6:03:01 |
| GGCGGCGGCGGTGGACGCGGG                    |       |       |       |                                                 |                     |
| 50830                                    | 50849 | 49926 | 53552 | CDS product single-stranded DNA-binding protein | 50830-50849 4:01:01 |
| GGACCAGGGCGCGGCCAAGG                     |       |       |       |                                                 |                     |
| 50844                                    | 50860 | 49926 | 53552 | CDS product single-stranded DNA-binding protein | 50844-50860 4:01:01 |
| CCAAGCCGCGCGCCC                          |       |       |       |                                                 |                     |
| 50877                                    | 50906 | 49926 | 53552 | CDS product single-stranded DNA-binding protein | 50877-50906 6:03:01 |
| GGCTGGCCTCGGTGATGGCGGCCGACACGG           |       |       |       |                                                 |                     |
| 50986                                    | 51024 | 49926 | 53552 | CDS product single-stranded DNA-binding protein | 50986-51024 7:04:01 |
| GGGCGCGGCGGACGAGGCGGCGAAGCTGGACGCGCTGGG  |       |       |       |                                                 |                     |
| 51047                                    | 51065 | 49926 | 53552 | CDS product single-stranded DNA-binding protein | 51047-51065 4:01:01 |
| GGGCTGGTGGGCGCCATGG                      |       |       |       |                                                 |                     |
| 51097                                    | 51119 | 49926 | 53552 | CDS product single-stranded DNA-binding protein | 51097-51119 6:03:01 |
| GGAGGTGGACGACGGCGGCGCGG                  |       |       |       |                                                 |                     |

|                                                         |       |       |       |                                                 |                      |
|---------------------------------------------------------|-------|-------|-------|-------------------------------------------------|----------------------|
| 51138                                                   | 51195 | 49926 | 53552 | CDS product single-stranded DNA-binding protein | 51138-51195 11:08:02 |
| CCGCCCGCGGCTTCCACCGCTTCTACCAAATCGCCGCCCTACGTGGCCGGAACCC |       |       |       |                                                 |                      |
| 51237                                                   | 51253 | 49926 | 53552 | CDS product single-stranded DNA-binding protein | 51237-51253 4:01:01  |
| CCGGCCCCGGCCGCGTCC                                      |       |       |       |                                                 |                      |
| 51283                                                   | 51307 | 49926 | 53552 | CDS product single-stranded DNA-binding protein | 51283-51307 4:01:01  |
| GGACCACCTGGCGATGGCGTGCGGG                               |       |       |       |                                                 |                      |
| 51489                                                   | 51516 | 49926 | 53552 | CDS product single-stranded DNA-binding protein | 51489-51516 5:02:01  |
| GGCTGCGGCACCGGCTGCCCCGGTTCGG                            |       |       |       |                                                 |                      |
| 51657                                                   | 51673 | 49926 | 53552 | CDS product single-stranded DNA-binding protein | 51657-51673 4:01:01  |
| CCACGTACCGCGCCGCC                                       |       |       |       |                                                 |                      |
| 51763                                                   | 51797 | 49926 | 53552 | CDS product single-stranded DNA-binding protein | 51763-51797 7:04:01  |
| CCACGCCAGCTTCCGCGCGCCCTGGCCGCCATCC                      |       |       |       |                                                 |                      |
| 51957                                                   | 51989 | 49926 | 53552 | CDS product single-stranded DNA-binding protein | 51957-51989 6:03:01  |
| GGCGCTCGGTGCTGGCCGTGGTGCAGGACTTGG                       |       |       |       |                                                 |                      |
| 52138                                                   | 52154 | 49926 | 53552 | CDS product single-stranded DNA-binding protein | 52138-52154 4:01:01  |
| GGAGGCCGCGGTCGCGG                                       |       |       |       |                                                 |                      |
| 52219                                                   | 52241 | 49926 | 53552 | CDS product single-stranded DNA-binding protein | 52219-52241 4:01:01  |
| GGTGAGCCTGGAGGTCTTCCGGG                                 |       |       |       |                                                 |                      |
| 52430                                                   | 52457 | 49926 | 53552 | CDS product single-stranded DNA-binding protein | 52430-52457 6:03:01  |
| CCGCCCCGGAGCCCCGACGCTAACCCCC                            |       |       |       |                                                 |                      |
| 52673                                                   | 52705 | 49926 | 53552 | CDS product single-stranded DNA-binding protein | 52673-52705 6:03:01  |
| GGGCTCACGGCGATCGTGGCCGGGGCGGGCGG                        |       |       |       |                                                 |                      |
| 52760                                                   | 52780 | 49926 | 53552 | CDS product single-stranded DNA-binding protein | 52760-52780 4:01:01  |

|                                                                          |       |       |       |                                                 |                      |
|--------------------------------------------------------------------------|-------|-------|-------|-------------------------------------------------|----------------------|
| 52771                                                                    | 52787 | 49926 | 53552 | CDS product single-stranded DNA-binding protein | 52771-52787 4:01:01  |
| CCCGACGCCTCGGCGGCCGCC<br>GGCGGCCCGCCAGGAGG                               |       |       |       |                                                 |                      |
| 52798                                                                    | 52827 | 49926 | 53552 | CDS product single-stranded DNA-binding protein | 52798-52827 6:03:01  |
| GGCCGAGGCCCGCCCGAGGTGTGGGCGGG                                            |       |       |       |                                                 |                      |
| 52830                                                                    | 52847 | 49926 | 53552 | CDS product single-stranded DNA-binding protein | 52830-52847 5:02:01  |
| CCTTCGCCGCCAGCCACC                                                       |       |       |       |                                                 |                      |
| 52858                                                                    | 52890 | 49926 | 53552 | CDS product single-stranded DNA-binding protein | 52858-52890 6:03:01  |
| GGTCATGGCCACGCGGCCCGGTGGTGCTGGG                                          |       |       |       |                                                 |                      |
| 52942                                                                    | 52971 | 49926 | 53552 | CDS product single-stranded DNA-binding protein | 52942-52971 6:03:01  |
| GGCGGGCAACTGGAGCGGCCTCAACGGGGG                                           |       |       |       |                                                 |                      |
| 53053                                                                    | 53070 | 49926 | 53552 | CDS product single-stranded DNA-binding protein | 53053-53070 4:01:01  |
| GGCCGCGGGCGCGGGCGG                                                       |       |       |       |                                                 |                      |
| 53120                                                                    | 53147 | 49926 | 53552 | CDS product single-stranded DNA-binding protein | 53120-53147 4:01:01  |
| GGCAGCAACGGCGCGCTGGCGCAGACGG                                             |       |       |       |                                                 |                      |
| 53188                                                                    | 53228 | 49926 | 53552 | CDS product single-stranded DNA-binding protein | 53188-53228 8:05:02  |
| GGAGCACATGGACCTGGACGACTGGGCGGCCCTGGTGGAGG                                |       |       |       |                                                 |                      |
| 53251                                                                    | 53309 | 49926 | 53552 | CDS product single-stranded DNA-binding protein | 53251-53309 11:08:02 |
| GGTGGAGCTGACGGAGCGCGTGGCTGCGCGGCCCGGGGGCTGGTCGCCGAGGGCGCGG               |       |       |       |                                                 |                      |
| 53329                                                                    | 53351 | 49926 | 53552 | CDS product single-stranded DNA-binding protein | 53329-53351 5:02:01  |
| GGAGCTCGAGGCGGCGCCGAGG                                                   |       |       |       |                                                 |                      |
| 53412                                                                    | 53486 | 49926 | 53552 | CDS product single-stranded DNA-binding protein | 53412-53486 13:10:03 |
| CCTACGCCTTCGGCGCCGCCGGGGCCGGGGCCGGCGGCACCTGCGCCATGCCGGGGGCCAAGCGCCCCGACC |       |       |       |                                                 |                      |



|                                                             |       |       |       |                                                 |             |                          |
|-------------------------------------------------------------|-------|-------|-------|-------------------------------------------------|-------------|--------------------------|
| 53423                                                       | 53451 | 49926 | 53552 | CDS product single-stranded DNA-binding protein | 53423-53451 | 5:02:01                  |
| GGCGCCGCCGGGGCCGGGGCCCGGCGG                                 |       |       |       |                                                 |             |                          |
| 53503                                                       | 53524 | 49926 | 53552 | CDS product single-stranded DNA-binding protein | 53503-53524 | 4:01:01                  |
| GGCGCCGTTCCGAAAAGCGG                                        |       |       |       |                                                 |             |                          |
| 53808                                                       | 53835 | 53789 | 56239 | CDS product DNA packaging terminase subunit 2   | 53808-53835 | 4:01:01                  |
| CCCCGTCGGTCCCGAGCCCGGCGGCCCC                                |       |       |       |                                                 |             |                          |
| 53850                                                       | 53893 | 53789 | 56239 | CDS product DNA packaging terminase subunit 2   | 53850-53893 | 8:05:02                  |
| CCCGGCGTCCGGCCCGCCAGCCAGCGGGCCGCGGCCCGCC                    |       |       |       |                                                 |             |                          |
| 53979                                                       | 53994 | 53789 | 56239 | CDS product DNA packaging terminase subunit 2   | 53979-53994 | 4:01:01 CCGCCACCTCGACGCC |
| 54141                                                       | 54161 | 53789 | 56239 | CDS product DNA packaging terminase subunit 2   | 54141-54161 | 4:01:01                  |
| GGCGGCCGCGGGCGCCGCGG                                        |       |       |       |                                                 |             |                          |
| 54321                                                       | 54360 | 53789 | 56239 | CDS product DNA packaging terminase subunit 2   | 54321-54360 | 6:03:01                  |
| CCTGCTCGCCTCGGCCGAGCCGCGCTCGCCGCGCTCGCC                     |       |       |       |                                                 |             |                          |
| 54380                                                       | 54406 | 53789 | 56239 | CDS product DNA packaging terminase subunit 2   | 54380-54406 | 7:04:01                  |
| GGGCCACGGTGGCGGCGGGCGCGTGG                                  |       |       |       |                                                 |             |                          |
| 54570                                                       | 54586 | 53789 | 56239 | CDS product DNA packaging terminase subunit 2   | 54570-54586 | 4:01:01                  |
| CCAGTACCTGCCGCACC                                           |       |       |       |                                                 |             |                          |
| 54608                                                       | 54673 | 53789 | 56239 | CDS product DNA packaging terminase subunit 2   | 54608-54673 | 14:11:03                 |
| GGCTGGCGGCGGCGGCGGCGCTGGAGGCGCTGGAAGCGCCGCCCGCGGGGCGCGCAGGG |       |       |       |                                                 |             |                          |
| 54687                                                       | 54739 | 53789 | 56239 | CDS product DNA packaging terminase subunit 2   | 54687-54739 | 10:07:02                 |
| GGCGAGCGGCCCTCCGGGGGCGCGGCGACGGCGGCTCGGTGCGGAGGCGG          |       |       |       |                                                 |             |                          |
| 54762                                                       | 54782 | 53789 | 56239 | CDS product DNA packaging terminase subunit 2   | 54762-54782 | 4:01:01                  |
| CCACGTCTCCGCCCCGGCGCC                                       |       |       |       |                                                 |             |                          |

|                                                                                                            |       |       |       |                                               |                                      |
|------------------------------------------------------------------------------------------------------------|-------|-------|-------|-----------------------------------------------|--------------------------------------|
| 54845                                                                                                      | 54867 | 53789 | 56239 | CDS product DNA packaging terminase subunit 2 | 54845-54867 6:03:01                  |
| CCACCGCCAGCGCCGTCGCCGCC                                                                                    |       |       |       |                                               |                                      |
| 54899                                                                                                      | 54940 | 53789 | 56239 | CDS product DNA packaging terminase subunit 2 | 54899-54940 9:06:02                  |
| GGGAGGCGCGGCACCGGCTGCAGGTGGCCGCGGCGGAGCTGG                                                                 |       |       |       |                                               |                                      |
| 54988                                                                                                      | 55012 | 53789 | 56239 | CDS product DNA packaging terminase subunit 2 | 54988-55012 6:03:01                  |
| GGGCTGGCGCGGCTGGACGGCGTGG                                                                                  |       |       |       |                                               |                                      |
| 55026                                                                                                      | 55042 | 53789 | 56239 | CDS product DNA packaging terminase subunit 2 | 55026-55042 4:01:01                  |
| GGGGAGCGCGGCGGTGG                                                                                          |       |       |       |                                               |                                      |
| 55166                                                                                                      | 55229 | 53789 | 56239 | CDS product DNA packaging terminase subunit 2 | 55166-55229 12:09:03                 |
| GGCGCGCGGCCGCGGGCGAGGAGGGGGCGAGGATGGGGCCGACTCGGGCGAAGAGGGGGGTGG                                            |       |       |       |                                               |                                      |
| 55243                                                                                                      | 55357 | 53789 | 56239 | CDS product DNA packaging terminase subunit 2 | 55243-55357 25:22:06                 |
| GGCGGGGACGGGACGGGGCCGGGGCGGCAACGGCGCGCGGGGCCGGCGGGGCGCGGACGGCGGGCCGGCGGGGACGACGGCCCCGCGGGCTGGGCGGCGCTGGCGG |       |       |       |                                               |                                      |
| 55548                                                                                                      | 55563 | 53789 | 56239 | CDS product DNA packaging terminase subunit 2 | 55548-55563 4:01:01 CCGCGCCTTCGCGGCC |
| 55573                                                                                                      | 55591 | 53789 | 56239 | CDS product DNA packaging terminase subunit 2 | 55573-55591 5:02:01                  |
| GGCGCGGGCACGGTGGTGG                                                                                        |       |       |       |                                               |                                      |
| 55596                                                                                                      | 55614 | 53789 | 56239 | CDS product DNA packaging terminase subunit 2 | 55596-55614 4:01:01                  |
| CCGCGCCTCGGACGCCACC                                                                                        |       |       |       |                                               |                                      |
| 55836                                                                                                      | 55861 | 53789 | 56239 | CDS product DNA packaging terminase subunit 2 | 55836-55861 7:04:01                  |
| GGCGGCCGAGGGGGCGGGTGGGTGG                                                                                  |       |       |       |                                               |                                      |
| 56019                                                                                                      | 56049 | 53789 | 56239 | CDS product DNA packaging terminase subunit 2 | 56019-56049 6:03:01                  |
| GGACCGAACGGCGCCGGGCCCGGACGGGCGG                                                                            |       |       |       |                                               |                                      |
| 56123                                                                                                      | 56146 | 53789 | 56239 | CDS product DNA packaging terminase subunit 2 | 56123-56146 5:02:01                  |
| GGGCGCCGATACGGTCGGCGAGG                                                                                    |       |       |       |                                               |                                      |

|                                                             |       |       |       |                                               |                                              |
|-------------------------------------------------------------|-------|-------|-------|-----------------------------------------------|----------------------------------------------|
| 56208                                                       | 56221 | 53789 | 56239 | CDS product DNA packaging terminase subunit 2 | 56208-56221 4:01:01 GGCGCCGGCGGCGG           |
| 56298                                                       | 56317 | 56092 | 58935 | CDS product envelope glycoprotein B           | 56298-56317 4:01:01 CCGACGACGCCGCTGTGCC      |
| 56319                                                       | 56346 | 56092 | 58935 | CDS product envelope glycoprotein B           | 56319-56346 6:03:01 GGGGAGCTGGGAGCGGGAGCCCGG |
| 56335                                                       | 56399 | 56092 | 58935 | CDS product envelope glycoprotein B           | 56335-56399 12:09:03                         |
| CCGGGAGCCCGCGCCCCAGCGAGCCCGCGCCCCCGCAAGCCCCGCCCGCCGACGGCCCC |       |       |       |                                               |                                              |
| 56492                                                       | 56510 | 56092 | 58935 | CDS product envelope glycoprotein B           | 56492-56510 4:01:01 CCCGCCGCCCTCGGGCGCC      |
| 56504                                                       | 56522 | 56092 | 58935 | CDS product envelope glycoprotein B           | 56504-56522 4:01:01 GGGGCCACGGTGGTCCGG       |
| 56793                                                       | 56808 | 56092 | 58935 | CDS product envelope glycoprotein B           | 56793-56808 4:01:01 GGGCGCAAGGTGGTGG         |
| 56894                                                       | 56927 | 56092 | 58935 | CDS product envelope glycoprotein B           | 56894-56927 6:03:01                          |
| GGACGAGGTGTACACGGCGCTGGGCTCGGCGGGG                          |       |       |       |                                               |                                              |
| 56963                                                       | 56985 | 56092 | 58935 | CDS product envelope glycoprotein B           | 56963-56985 6:03:01 GGAGGAGGTGGAGGCGCGCTCGG  |
| 57197                                                       | 57213 | 56092 | 58935 | CDS product envelope glycoprotein B           | 57197-57213 4:01:01 GGTGGCCTGGGACTGGG        |
| 57389                                                       | 57405 | 56092 | 58935 | CDS product envelope glycoprotein B           | 57389-57405 4:01:01 GGAGGCCGGGGCCGCGG        |
| 57601                                                       | 57631 | 56092 | 58935 | CDS product envelope glycoprotein B           | 57601-57631 6:03:01                          |
| CCGCCGCTGCCGCGCGCCCAAGCCGGTACC                              |       |       |       |                                               |                                              |
| 57644                                                       | 57680 | 56092 | 58935 | CDS product envelope glycoprotein B           | 57644-57680 9:06:02                          |
| CCGGTCCGCGTCCCCACGCCCCCGCGCCCGCGCC                          |       |       |       |                                               |                                              |
| 57684                                                       | 57700 | 56092 | 58935 | CDS product envelope glycoprotein B           | 57684-57700 4:01:01 GGCGACGGCGGCGACGG        |
| 57760                                                       | 57780 | 56092 | 58935 | CDS product envelope glycoprotein B           | 57760-57780 4:01:01 CCTACGACCACATCCAGGACC    |
| 57800                                                       | 57822 | 56092 | 58935 | CDS product envelope glycoprotein B           | 57800-57822 5:02:01 CCGCCTGGCCACGTCTCGGTGCC  |
| 57902                                                       | 57914 | 56092 | 58935 | CDS product envelope glycoprotein B           | 57902-57914 4:01:01 CCGCCGCGCCGCC            |
| 58022                                                       | 58043 | 56092 | 58935 | CDS product envelope glycoprotein B           | 58022-58043 5:02:01 CCGCCCGCCGTCTCCTTCGCC    |
| 58064                                                       | 58086 | 56092 | 58935 | CDS product envelope glycoprotein B           | 58064-58086 5:02:01 GGTGGAGGGCCAGCTCGGCGAGG  |

|                                                                                                    |       |       |       |                                     |             |                                    |
|----------------------------------------------------------------------------------------------------|-------|-------|-------|-------------------------------------|-------------|------------------------------------|
| 58244                                                                                              | 58282 | 56092 | 58935 | CDS product envelope glycoprotein B | 58244-58282 | 6:03:01                            |
| CCTGAACCTCACGGTCCTAGAGGACCGCGAGTTCCTGCC                                                            |       |       |       |                                     |             |                                    |
| 58394                                                                                              | 58416 | 56092 | 58935 | CDS product envelope glycoprotein B | 58394-58416 | 4:01:01 GGTCAAGACGGACGGCAACATGG    |
| 58448                                                                                              | 58501 | 56092 | 58935 | CDS product envelope glycoprotein B | 58448-58501 | 8:05:02                            |
| GGGCCTGGGCGCCGTCGGGCAGGCAGTGGGCACGGTTGTGCTGGGCGCCGCGGG                                             |       |       |       |                                     |             |                                    |
| 58554                                                                                              | 58578 | 56092 | 58935 | CDS product envelope glycoprotein B | 58554-58578 | 4:01:01 GGC GCGCTGGCCACGGGGCTGCTGG |
| 58597                                                                                              | 58614 | 56092 | 58935 | CDS product envelope glycoprotein B | 58597-58614 | 4:01:01 CCGCCTTCCTGGCGTACC         |
| 58624                                                                                              | 58643 | 56092 | 58935 | CDS product envelope glycoprotein B | 58624-58643 | 4:01:01 CCCGCTCCGAGCAACCCC         |
| 58694                                                                                              | 58728 | 56092 | 58935 | CDS product envelope glycoprotein B | 58694-58728 | 8:05:02                            |
| GGGCGCGGGCGCCCCGGGCGAGGAGGGGAGGAGG                                                                 |       |       |       |                                     |             |                                    |
| 58876                                                                                              | 58893 | 56092 | 58935 | CDS product envelope glycoprotein B | 58876-58893 | 4:01:01 GGC GCGGGCGCCGCCGG         |
| 58887                                                                                              | 58916 | 56092 | 58935 | CDS product envelope glycoprotein B | 58887-58916 | 5:02:01                            |
| CCGCCGGCGTACCAGCAGCTCCCGATGTCC                                                                     |       |       |       |                                     |             |                                    |
| 59545                                                                                              | 59651 | 59444 | 60391 | CDS product capsid scaffold protein | 59545-59651 | 21:18:05                           |
| GGCAATGGCCCCGGGCTCCTCAGGTGGCCCCGCCGACGCGGGCGCCGGGGCGCGGGGTGGCGAGCGGTGGGGCCGGGCGGGCCTGGGCCGGCGCGGGG |       |       |       |                                     |             |                                    |
| 59622                                                                                              | 59641 | 59444 | 60391 | CDS product capsid scaffold protein | 59622-59641 | 4:01:01 CCGGGCGCGGGCCTGGGCC        |
| 59661                                                                                              | 59680 | 59444 | 60391 | CDS product capsid scaffold protein | 59661-59680 | 5:02:01 GGGCCGGCGCGGGGGCCGGG       |
| 59676                                                                                              | 59692 | 59444 | 60391 | CDS product capsid scaffold protein | 59676-59692 | 4:01:01 CCGGGCCCCGACACC            |
| 59693                                                                                              | 59708 | 59444 | 60391 | CDS product capsid scaffold protein | 59693-59708 | 4:01:01 GGCTGGGGCGGAGCGG           |
| 59738                                                                                              | 59770 | 59444 | 60391 | CDS product capsid scaffold protein | 59738-59770 | 8:05:02                            |
| GGCAGGCACGGCACGGGCGCTGGGGCAGGTGG                                                                   |       |       |       |                                     |             |                                    |
| 59779                                                                                              | 59810 | 59444 | 60391 | CDS product capsid scaffold protein | 59779-59810 | 5:02:01                            |
| GGCCGCGAAGCGGGGCCGTAGGGTAGCCGG                                                                     |       |       |       |                                     |             |                                    |

|                                                                      |       |       |       |                                        |             |                                   |
|----------------------------------------------------------------------|-------|-------|-------|----------------------------------------|-------------|-----------------------------------|
| 59863                                                                | 59931 | 59444 | 60391 | CDS product capsid scaffold protein    | 59863-59931 | 14:11:03                          |
| GGAGAGGGCGTGTGGAGCCGGCTGTGGCGGCGAGGGGGGCGGTGGTGCTGGGGCGGCAGCTCGGCGGG |       |       |       |                                        |             |                                   |
| 59955                                                                | 59975 | 59444 | 60391 | CDS product capsid scaffold protein    | 59955-59975 | 4:01:01 CCTCGTCGTCCCCGCCGCCCC     |
| 60013                                                                | 60037 | 59444 | 60391 | CDS product capsid scaffold protein    | 60013-60037 | 7:04:01 GGCTGGGGGGCGGCGGTCGAGGGGG |
| 60038                                                                | 60070 | 59444 | 60391 | CDS product capsid scaffold protein    | 60038-60070 | 6:03:01                           |
| CCGTCTAGCCCGGCCCGTCCGCGCCCTGCGCC                                     |       |       |       |                                        |             |                                   |
| 60075                                                                | 60107 | 59444 | 60391 | CDS product capsid scaffold protein    | 60075-60107 | 6:03:01                           |
| GGCGCCGCGCGTCGCGGATGGCGCCGCCAGGG                                     |       |       |       |                                        |             |                                   |
| 60151                                                                | 60185 | 59444 | 60391 | CDS product capsid scaffold protein    | 60151-60185 | 7:04:01                           |
| GGGGTGCCAGGGCGCGGCGGCCACTGGCGGCGG                                    |       |       |       |                                        |             |                                   |
| 60200                                                                | 60266 | 59444 | 60391 | CDS product capsid scaffold protein    | 60200-60266 | 16:13:04                          |
| GGCATCGGGGCGGGGCGGCGGCGGATGGCGGGCGGCAGGAAGTACGGGGCGGCGGGGCGCGG       |       |       |       |                                        |             |                                   |
| 60340                                                                | 60360 | 59444 | 60391 | CDS product capsid scaffold protein    | 60340-60360 | 5:02:01 GGCCGGCAGGGGGTGCGCCGG     |
| 60391                                                                | 60424 | 59444 | 61303 | CDS product capsid maturation protease | 60391-60424 | 8:05:02                           |
| GGCGGGGGCGGCGCCGCGGAAGCTCCGGCTGG                                     |       |       |       |                                        |             |                                   |
| 60507                                                                | 60520 | 59444 | 61303 | CDS product capsid maturation protease | 60507-60520 | 4:01:01 CCTCCCCCGGCC              |
| 60665                                                                | 60692 | 59444 | 61303 | CDS product capsid maturation protease | 60665-60692 | 5:02:01                           |
| GGCACCGGCCAGGCGCGGTCGCCGAGGG                                         |       |       |       |                                        |             |                                   |
| 60703                                                                | 60728 | 59444 | 61303 | CDS product capsid maturation protease | 60703-60728 | 6:03:01                           |
| GGCCTCGGCGTCGGCGAGGAGGGCGG                                           |       |       |       |                                        |             |                                   |
| 60750                                                                | 60782 | 59444 | 61303 | CDS product capsid maturation protease | 60750-60782 | 7:04:01                           |
| GGCGGAAGGGGCCACACAGGCTTCGGGCGTGG                                     |       |       |       |                                        |             |                                   |
| 60851                                                                | 60874 | 59444 | 61303 | CDS product capsid maturation protease | 60851-60874 | 5:02:01 CCGTCGGCCTCCTCGCGGGCGCC   |

|       |       |       |       |                                                 |             |         |                      |
|-------|-------|-------|-------|-------------------------------------------------|-------------|---------|----------------------|
| 60868 | 60887 | 59444 | 61303 | CDS product capsid maturation protease          | 60868-60887 | 4:01:01 | GGGCGCCAGGCGGCGGAGG  |
| 61111 | 61131 | 59444 | 61303 | CDS product capsid maturation protease          | 61111-61131 | 5:02:01 | GGGCAGCGGGCGGCGGGCGG |
| 61268 | 61284 | 59444 | 61303 | CDS product capsid maturation protease          | 61268-61284 | 4:01:01 | CCGGCGCCGCCGTCGCC    |
| 61586 | 61599 | 61408 | 63219 | CDS product DNA packaging tegument protein UL25 | 61586-61599 | 4:01:01 | CCGCCACGACCTCC       |
| 61605 | 61629 | 61408 | 63219 | CDS product DNA packaging tegument protein UL25 | 61605-61629 | 6:03:01 |                      |
|       |       |       |       | GGGCGCCGGCGGGCGCGGTGGCGG                        |             |         |                      |
| 61858 | 61904 | 61408 | 63219 | CDS product DNA packaging tegument protein UL25 | 61858-61904 | 8:05:02 |                      |
|       |       |       |       | CCCACGGCGCGTCGGGGCCGCCGTCGGCGCCGCGCCACCTCCCC    |             |         |                      |
| 61913 | 61934 | 61408 | 63219 | CDS product DNA packaging tegument protein UL25 | 61913-61934 | 4:01:01 |                      |
|       |       |       |       | CCGCGCCGGGCACCAGCGTGCC                          |             |         |                      |
| 62039 | 62064 | 61408 | 63219 | CDS product DNA packaging tegument protein UL25 | 62039-62064 | 5:02:01 |                      |
|       |       |       |       | GGCTCTGGTCCTCGGCGAGGAAGAGG                      |             |         |                      |
| 62153 | 62174 | 61408 | 63219 | CDS product DNA packaging tegument protein UL25 | 62153-62174 | 5:02:01 |                      |
|       |       |       |       | CCGCGCCGCCGCCAGCGCCCC                           |             |         |                      |
| 62175 | 62190 | 61408 | 63219 | CDS product DNA packaging tegument protein UL25 | 62175-62190 | 4:01:01 | GGGGATGGCCGGCAGG     |
| 62254 | 62274 | 61408 | 63219 | CDS product DNA packaging tegument protein UL25 | 62254-62274 | 5:02:01 |                      |
|       |       |       |       | CCCGCGCCGCCGCCCGGCGCC                           |             |         |                      |
| 62269 | 62295 | 61408 | 63219 | CDS product DNA packaging tegument protein UL25 | 62269-62295 | 5:02:01 |                      |
|       |       |       |       | GGCGCCTGGAAGTGGCCCCGTGGGAGG                     |             |         |                      |
| 62427 | 62451 | 61408 | 63219 | CDS product DNA packaging tegument protein UL25 | 62427-62451 | 5:02:01 |                      |
|       |       |       |       | GGTGGCGCGGTGCGCGAGGTGCAGG                       |             |         |                      |
| 62522 | 62538 | 61408 | 63219 | CDS product DNA packaging tegument protein UL25 | 62522-62538 | 5:02:01 |                      |
|       |       |       |       | CCGCCACCGCGGCCGCC                               |             |         |                      |

|                                                            |       |       |       |                                                 |             |                                      |
|------------------------------------------------------------|-------|-------|-------|-------------------------------------------------|-------------|--------------------------------------|
| 62650                                                      | 62666 | 61408 | 63219 | CDS product DNA packaging tegument protein UL25 | 62650-62666 | 5:02:01                              |
| CCCGCCGAGCCCCGCC                                           |       |       |       |                                                 |             |                                      |
| 62688                                                      | 62713 | 61408 | 63219 | CDS product DNA packaging tegument protein UL25 | 62688-62713 | 5:02:01                              |
| GGCCAGCAGGTCGGCCGCCAGGGTGG                                 |       |       |       |                                                 |             |                                      |
| 62782                                                      | 62831 | 61408 | 63219 | CDS product DNA packaging tegument protein UL25 | 62782-62831 | 9:06:02                              |
| CCGAGCGCGCCCGCGCCGAGTCCCCGTCTCGCCCTCCCCCGCGCGGCC           |       |       |       |                                                 |             |                                      |
| 62840                                                      | 62904 | 61408 | 63219 | CDS product DNA packaging tegument protein UL25 | 62840-62904 | 17:14:04                             |
| CCGCCGACTCCGCCCGCGCCCGCGTCCGCTCTCCGCCCGGCGCGCCCTCTCCAGGTCC |       |       |       |                                                 |             |                                      |
| 62918                                                      | 62937 | 61408 | 63219 | CDS product DNA packaging tegument protein UL25 | 62918-62937 | 5:02:01                              |
| CCACCTCCGCCACGCGGGCC                                       |       |       |       |                                                 |             |                                      |
| 63002                                                      | 63034 | 61408 | 63219 | CDS product DNA packaging tegument protein UL25 | 63002-63034 | 6:03:01                              |
| CCGCGGCCGTGCCGCGCCCGGTCCGCGCCC                             |       |       |       |                                                 |             |                                      |
| 63207                                                      | 63235 | 63201 | 64040 | CDS product nuclear protein UL24                | 63207-63235 | 5:02:01                              |
| CCCAAGCGCCATGGCCCCGGCGCCGCCCC                              |       |       |       |                                                 |             |                                      |
| 63244                                                      | 63271 | 63201 | 64040 | CDS product nuclear protein UL24                | 63244-63271 | 5:02:01 CCGAGATCCCGCCCAGGCACGCCGCGCC |
| 63282                                                      | 63296 | 63201 | 64040 | CDS product nuclear protein UL24                | 63282-63296 | 5:02:01 CCCCCACCCCCGCC               |
| 63310                                                      | 63332 | 63201 | 64040 | CDS product nuclear protein UL24                | 63310-63332 | 5:02:01 CCTCGGCCCTCCCGCCCCGCGCC      |
| 63339                                                      | 63376 | 63201 | 64040 | CDS product nuclear protein UL24                | 63339-63376 | 9:06:02                              |
| GGGGACTGGGATGGGGACGGGGCGGGGCGGACGCGG                       |       |       |       |                                                 |             |                                      |
| 63377                                                      | 63398 | 63201 | 64040 | CDS product nuclear protein UL24                | 63377-63398 | 6:03:01 CCGCCCCTTCGCCGCCGCGCC        |
| 63402                                                      | 63423 | 63201 | 64040 | CDS product nuclear protein UL24                | 63402-63423 | 4:01:01 GGTCTCGGTCTCGGTCTCCCGG       |
| 63449                                                      | 63462 | 63201 | 64040 | CDS product nuclear protein UL24                | 63449-63462 | 4:01:01 CCGCCCCGCCGCC                |
| 63601                                                      | 63635 | 63201 | 64040 | CDS product nuclear protein UL24                | 63601-63635 | 7:04:01                              |

|                                                              |       |       |       |                                  |                                                    |
|--------------------------------------------------------------|-------|-------|-------|----------------------------------|----------------------------------------------------|
| CCAGCACCGGCGCCAGGACCACCGGTCCGGGCCC                           |       |       |       |                                  |                                                    |
| 63609                                                        | 63647 | 63201 | 64040 | CDS product nuclear protein UL24 | 63609-63647 7:04:01                                |
| GGCGCCAGGACCACCGGTCCGGGCCCGGGGGGCGAGG                        |       |       |       |                                  |                                                    |
| 63880                                                        | 63909 | 63201 | 64040 | CDS product nuclear protein UL24 | 63880-63909 5:02:01                                |
| CCTCCGGGGCGCCGAACCTCGCCAAGAGCC                               |       |       |       |                                  |                                                    |
| 63910                                                        | 63928 | 63201 | 64040 | CDS product nuclear protein UL24 | 63910-63928 4:01:01 GGGCTAGGCGCGGGCGCGG            |
| 63984                                                        | 64001 | 63201 | 64040 | CDS product nuclear protein UL24 | 63984-64001 4:01:01 CCGTGGCACCGGACCCCC             |
| 64091                                                        | 64112 | 64039 | 65109 | CDS product thymidine kinase     | 64091-64112 4:01:01 GGACGGCGCGCACGGGCTGGGG         |
| 64141                                                        | 64154 | 64039 | 65109 | CDS product thymidine kinase     | 64141-64154 5:02:01 CCGCCGCTCCGCC                  |
| 64235                                                        | 64266 | 64039 | 65109 | CDS product thymidine kinase     | 64235-64266 6:03:01 CCTCGCCGCGTCCGCGCCGCGCCGCGGCCC |
| 64262                                                        | 64302 | 64039 | 65109 | CDS product thymidine kinase     | 64262-64302 8:05:02                                |
| GGCCCAGGGGGGCGCGGACGCGGACGCGCCGGCCTGG                        |       |       |       |                                  |                                                    |
| 64374                                                        | 64390 | 64039 | 65109 | CDS product thymidine kinase     | 64374-64390 4:01:01 CCGCCTGAGCCGGCGCC              |
| 64424                                                        | 64476 | 64039 | 65109 | CDS product thymidine kinase     | 64424-64476 10:07:02                               |
| CCGGCACCCCTGGCCGCTGCCTGTGCTACCCCTTCGCCGCTACTGCCTCC           |       |       |       |                                  |                                                    |
| 64558                                                        | 64571 | 64039 | 65109 | CDS product thymidine kinase     | 64558-64571 4:01:01 CCCTCCCCCGGCC                  |
| 64603                                                        | 64635 | 64039 | 65109 | CDS product thymidine kinase     | 64603-64635 5:02:01                                |
| GGCCCGGGGACCGCGCGGACGCGGCTTTCTGG                             |       |       |       |                                  |                                                    |
| 64686                                                        | 64749 | 64039 | 65109 | CDS product thymidine kinase     | 64686-64749 11:08:02                               |
| GGCGCGGGGGCGCGTGCGCGACGGCTGGGACGCGTGGGTGGGCGGACGCGGACGCGCTGG |       |       |       |                                  |                                                    |
| 64851                                                        | 64863 | 64039 | 65109 | CDS product thymidine kinase     | 64851-64863 4:01:01 GGCGCGGGGCGG                   |
| 64865                                                        | 64883 | 64039 | 65109 | CDS product thymidine kinase     | 64865-64883 4:01:01 CCTGCCC GCGTCCACGCC            |
| 64897                                                        | 64920 | 64039 | 65109 | CDS product thymidine kinase     | 64897-64920 5:02:01 CCCTGGCCGACCGCTTGCGGCCC        |



|                                                              |       |       |       |                                     |
|--------------------------------------------------------------|-------|-------|-------|-------------------------------------|
| 64989                                                        | 65007 | 64039 | 65109 | CDS product thymidine kinase        |
| 65012                                                        | 65026 | 64039 | 65109 | CDS product thymidine kinase        |
| 65036                                                        | 65064 | 64039 | 65109 | CDS product thymidine kinase        |
| 65073                                                        | 65096 | 64039 | 65109 | CDS product thymidine kinase        |
| 65075                                                        | 65101 | 64039 | 65109 | CDS product thymidine kinase        |
| 65277                                                        | 65302 | 65226 | 67772 | CDS product envelope glycoprotein H |
| 65326                                                        | 65387 | 65226 | 67772 | CDS product envelope glycoprotein H |
| GGGCGGGACGCGCGGTACGAGGTCGAGGAGTGGGAGATGGTGGTCGGGGCGAGTCGGCGG |       |       |       |                                     |
| 65400                                                        | 65418 | 65226 | 67772 | CDS product envelope glycoprotein H |
| 65563                                                        | 65588 | 65226 | 67772 | CDS product envelope glycoprotein H |
| 65668                                                        | 65686 | 65226 | 67772 | CDS product envelope glycoprotein H |
| 65758                                                        | 65790 | 65226 | 67772 | CDS product envelope glycoprotein H |
| CCTGCCGCGCGCTCCGCGCCCCGCGCCGACGCC                            |       |       |       |                                     |
| 65830                                                        | 65843 | 65226 | 67772 | CDS product envelope glycoprotein H |
| 65918                                                        | 65947 | 65226 | 67772 | CDS product envelope glycoprotein H |
| CCCGTCTCCTACGTCCCCACGGGCCGGGCC                               |       |       |       |                                     |
| 65964                                                        | 65994 | 65226 | 67772 | CDS product envelope glycoprotein H |
| GGGCCGCGGTCCGGCTGGAGGTGGGGCTCGG                              |       |       |       |                                     |
| 66106                                                        | 66132 | 65226 | 67772 | CDS product envelope glycoprotein H |
| 66128                                                        | 66143 | 65226 | 67772 | CDS product envelope glycoprotein H |
| 66155                                                        | 66176 | 65226 | 67772 | CDS product envelope glycoprotein H |
| 66247                                                        | 66284 | 65226 | 67772 | CDS product envelope glycoprotein H |
| CCTGGCCGCCGCGCACCGGGAGGCCTTCCTGATGCTCC                       |       |       |       |                                     |

|             |          |                               |
|-------------|----------|-------------------------------|
| 64989-65007 | 4:01:01  | CCCGCCATGCGGGCCGCC            |
| 65012-65026 | 4:01:01  | GGACGGGGCGGCGGG               |
| 65036-65064 | 5:02:01  | GGCGGACCTGGCGCGCCGGTTCGCGCGGG |
| 65073-65096 | 4:01:01  | CCGGGGGGGCCCGAGGCGGCCCC       |
| 65075-65101 | 5:02:01  | GGGGGGGGCCCGAGGCGGCCCCAGGGG   |
| 65277-65302 | 5:02:01  | CCGCGCTCGCCGCGGGCGCCCCGCC     |
| 65326-65387 | 12:09:03 |                               |
| 65400-65418 | 4:01:01  | CCATCCACTGCCTTGGGCC           |
| 65563-65588 | 4:01:01  | GGACGCCGGGATCCCGGACACCCCGG    |
| 65668-65686 | 4:01:01  | CCTGGTGCCGAGCCGGCCC           |
| 65758-65790 | 6:03:01  |                               |
| 65830-65843 | 4:01:01  | GGCCGGCGGCGCGG                |
| 65918-65947 | 5:02:01  |                               |
| 65964-65994 | 7:04:01  |                               |
| 66106-66132 | 6:03:01  | CCCGCCGCCCGGGCCCGCGCCCGGGCC   |
| 66128-66143 | 4:01:01  | GGGCCGCGGCGGCGGG              |
| 66155-66176 | 4:01:01  | GGCTACGGGAGCTCGCGGCTGG        |
| 66247-66284 | 7:04:01  |                               |

|                                                 |       |       |       |                                     |
|-------------------------------------------------|-------|-------|-------|-------------------------------------|
| 66285                                           | 66296 | 65226 | 67772 | CDS product envelope glycoprotein H |
| 66304                                           | 66353 | 65226 | 67772 | CDS product envelope glycoprotein H |
| CCGCGGGCCCGGGCCGGCCCCGCGCGGACGCCGCTACCACGCGTACC |       |       |       |                                     |
| 66354                                           | 66373 | 65226 | 67772 | CDS product envelope glycoprotein H |
| 66655                                           | 66673 | 65226 | 67772 | CDS product envelope glycoprotein H |
| 66678                                           | 66704 | 65226 | 67772 | CDS product envelope glycoprotein H |
| 66728                                           | 66745 | 65226 | 67772 | CDS product envelope glycoprotein H |
| 66738                                           | 66758 | 65226 | 67772 | CDS product envelope glycoprotein H |
| 66781                                           | 66815 | 65226 | 67772 | CDS product envelope glycoprotein H |
| GGCGTCGGCGTTCCCGGCGGACGCGCAGGCGCTGG             |       |       |       |                                     |
| 66849                                           | 66890 | 65226 | 67772 | CDS product envelope glycoprotein H |
| CCATGTGCACCGCCGGCCACGCCACGGCGGCCGCCCTGGACC      |       |       |       |                                     |
| 66874                                           | 66899 | 65226 | 67772 | CDS product envelope glycoprotein H |
| 66912                                           | 66931 | 65226 | 67772 | CDS product envelope glycoprotein H |
| 66914                                           | 66938 | 65226 | 67772 | CDS product envelope glycoprotein H |
| 66975                                           | 66992 | 65226 | 67772 | CDS product envelope glycoprotein H |
| 67041                                           | 67085 | 65226 | 67772 | CDS product envelope glycoprotein H |
| GGGCCGCGCTGGACGCTGGCTGGAGGTGCGGCCCGCGGCCGCGG    |       |       |       |                                     |
| 67073                                           | 67102 | 65226 | 67772 | CDS product envelope glycoprotein H |
| CCCGCGGCCGCGGCCGAACCTCAGCGCC                    |       |       |       |                                     |
| 67105                                           | 67130 | 65226 | 67772 | CDS product envelope glycoprotein H |
| 67190                                           | 67206 | 65226 | 67772 | CDS product envelope glycoprotein H |
| 67357                                           | 67376 | 65226 | 67772 | CDS product envelope glycoprotein H |

|             |         |                            |
|-------------|---------|----------------------------|
| 66285-66296 | 4:01:01 | GGGAGGCGGCGG               |
| 66304-66353 | 9:06:02 |                            |
| 66354-66373 | 4:01:01 | GGGTCGCGGCGCGCTGGGG        |
| 66655-66673 | 4:01:01 | CCCGGACGCCCCGCCGCC         |
| 66678-66704 | 6:03:01 | GGCGGCTGGCCACGGCGTGGTGTCCG |
| 66728-66745 | 4:01:01 | GGCGAGCTGGCCTGGCGG         |
| 66738-66758 | 4:01:01 | CCTGGCGGCCCGCCGCGGCC       |
| 66781-66815 | 6:03:01 |                            |
| 66849-66890 | 8:05:02 |                            |
| 66874-66899 | 6:03:01 | GGCGGCCGCCCTGGACCTGGAGGAGG |
| 66912-66931 | 4:01:01 | CCGGCGCGCCCGGGGCCGCC       |
| 66914-66938 | 4:01:01 | GGCGGCCCCGGGGCCGCCGCGCGG   |
| 66975-66992 | 4:01:01 | CCTCATTCCGCCTGGACC         |
| 67041-67085 | 8:05:02 |                            |
| 67073-67102 | 5:02:01 |                            |
| 67105-67130 | 5:02:01 | GGCGCTTGGCATGCTGGGCCGGGGG  |
| 67190-67206 | 4:01:01 | GGCGGTGGGGCGCGGG           |
| 67357-67376 | 4:01:01 | GGCCAGCGGCGCGTGGAGG        |

67381 67401 65226 67772 CDS product envelope glycoprotein H  
 67543 67574 65226 67772 CDS product envelope glycoprotein H  
 CCCCCGCCTCCACAGCGGCCGCTCCCGCGCCC  
 67659 67689 65226 67772 CDS product envelope glycoprotein H  
 GGGCTTCGGTGGCCGGGGCGCTGGTCGCGGG  
 67970 68022 67966 69777 CDS product tegument protein UL21  
 CCCC GGCGCCGCCCCCGCGCTCGCCTCCTCCGCCTCCTCTTCTCTCC  
 68068 68086 67966 69777 CDS product tegument protein UL21  
 68123 68146 67966 69777 CDS product tegument protein UL21  
 68207 68240 67966 69777 CDS product tegument protein UL21  
 CCAGCGCCCGCGCCAGCTCCGGCAGCCCGCCGCC  
 68336 68359 67966 69777 CDS product tegument protein UL21  
 68416 68454 67966 69777 CDS product tegument protein UL21  
 CCGTCACCCCGCTCCCGCCGCCACCGGCGCCCGCGCC  
 68455 68491 67966 69777 CDS product tegument protein UL21  
 GGGGTCGGCGGGCGGCTCGCCGGGTCGGCGCGGG  
 68573 68602 67966 69777 CDS product tegument protein UL21  
 GGGGCGCGGGCGGCGGTGCGGGTAGTTGG  
 68728 68756 67966 69777 CDS product tegument protein UL21  
 CCAACGAAGCCGCGGCGCCCGCGCGGCC  
 68900 68943 67966 69777 CDS product tegument protein UL21  
 GGGACGGGGGGCGGCCACGGCCAGGCGTTGTGGGTCCGCGGG  
 68973 68997 67966 69777 CDS product tegument protein UL21

67381-67401 5:02:01 CCGCCTCCCGGTCCCCGGCCC  
 67543-67574 7:04:01  
 67659-67689 6:03:01  
 67970-68022 13:10:03  
 68068-68086 6:03:01 CCGGCCACCCCAGCCGCC  
 68123-68146 5:02:01 GGGCGGCGGGCGCGGTCTGAAGG  
 68207-68240 7:04:01  
 68336-68359 6:03:01 GGGAGGCCAGGCTCAGGACGGCGG  
 68416-68454 9:06:02  
 68455-68491 7:04:01  
 68573-68602 6:03:01  
 68728-68756 4:01:01  
 68900-68943 7:04:01  
 68973-68997 5:02:01 GGCGGCTCCGCGGCGCCCGGCGGG

|                                                                                        |       |       |       |                                   |             |          |                             |
|----------------------------------------------------------------------------------------|-------|-------|-------|-----------------------------------|-------------|----------|-----------------------------|
| 69006                                                                                  | 69021 | 67966 | 69777 | CDS product tegument protein UL21 | 69006-69021 | 4:01:01  | CCCGCCGGCGCCCGCC            |
| 69031                                                                                  | 69060 | 67966 | 69777 | CDS product tegument protein UL21 | 69031-69060 | 7:04:01  |                             |
| CCGGCGCCGCGTCGTCCGCGCCGGCCCC                                                           |       |       |       |                                   |             |          |                             |
| 69065                                                                                  | 69091 | 67966 | 69777 | CDS product tegument protein UL21 | 69065-69091 | 7:04:01  | GGCGGACGCCGGCGGGCGGGCGGGCGG |
| 69125                                                                                  | 69162 | 67966 | 69777 | CDS product tegument protein UL21 | 69125-69162 | 8:05:02  |                             |
| CCTCCCCACGCGTCGGCCCCGCTCCCGCGGCCCGCC                                                   |       |       |       |                                   |             |          |                             |
| 69197                                                                                  | 69228 | 67966 | 69777 | CDS product tegument protein UL21 | 69197-69228 | 7:04:01  |                             |
| GGGGGCGCGCGGGCGCCGGCGCGCGCCGGCAGG                                                      |       |       |       |                                   |             |          |                             |
| 69443                                                                                  | 69467 | 67966 | 69777 | CDS product tegument protein UL21 | 69443-69467 | 5:02:01  | CCGCGCCCCGGGCCGGGGCCCCGCC   |
| 69531                                                                                  | 69565 | 67966 | 69777 | CDS product tegument protein UL21 | 69531-69565 | 8:05:02  |                             |
| GGCCGCGCCGGCGGGCGGGGCGAGGGGGCCCGCGG                                                    |       |       |       |                                   |             |          |                             |
| 69650                                                                                  | 69662 | 67966 | 69777 | CDS product tegument protein UL21 | 69650-69662 | 4:01:01  | CCTCCCCGCCCCC               |
| 69671                                                                                  | 69687 | 67966 | 69777 | CDS product tegument protein UL21 | 69671-69687 | 4:01:01  | CCGAGACCACCGTGCC            |
| 69938                                                                                  | 70002 | 69889 | 70578 | CDS product envelope protein UL20 | 69938-70002 | 17:14:04 |                             |
| GGGCGGCGCCGAGGCGGAGGAGGGGGCGGCCGGGGCGGCGCCTCGGACGGCGAGGGGGAGGAGG                       |       |       |       |                                   |             |          |                             |
| 70031                                                                                  | 70050 | 69889 | 70578 | CDS product envelope protein UL20 | 70031-70050 | 4:01:01  | GGCGTACGGGGCGACGTGG         |
| 70109                                                                                  | 70131 | 69889 | 70578 | CDS product envelope protein UL20 | 70109-70131 | 4:01:01  | GGCGTACGTGGTCTTTGGCGCGG     |
| 70249                                                                                  | 70267 | 69889 | 70578 | CDS product envelope protein UL20 | 70249-70267 | 5:02:01  | GGCTGGCGCGGCCGCGGG          |
| 70280                                                                                  | 70298 | 69889 | 70578 | CDS product envelope protein UL20 | 70280-70298 | 4:01:01  | GGGCGTGCGGGCGGACCGG         |
| 70308                                                                                  | 70401 | 69889 | 70578 | CDS product envelope protein UL20 | 70308-70401 | 16:13:04 |                             |
| GGGCGCTGGCCGCGGGCGCTGCTGGCGGCGTGGTCTCTGGCGCGCGCGGCGTCTTCGCGCGGCTGCCGGCGCCTTCGCGGGCCCCG |       |       |       |                                   |             |          |                             |
| 70424                                                                                  | 70441 | 69889 | 70578 | CDS product envelope protein UL20 | 70424-70441 | 5:02:01  | GGCGGCGGCCGACGGCGG          |
| 70451                                                                                  | 70463 | 69889 | 70578 | CDS product envelope protein UL20 | 70451-70463 | 4:01:01  | GGCGGCGGGGGG                |

|                                           |       |       |       |                                   |             |         |                             |
|-------------------------------------------|-------|-------|-------|-----------------------------------|-------------|---------|-----------------------------|
| 70472                                     | 70497 | 69889 | 70578 | CDS product envelope protein UL20 | 70472-70497 | 6:03:01 | GGCCGGGCTGGCGGCGTACACGGCGG  |
| 70698                                     | 70720 | 70658 | 74833 | CDS product major capsid protein  | 70698-70720 | 5:02:01 | GGGCGGGCTGGTCTCCGGCCAGG     |
| 70808                                     | 70825 | 70658 | 74833 | CDS product major capsid protein  | 70808-70825 | 4:01:01 | CCGCCTTCGACGCCCTCC          |
| 70866                                     | 70885 | 70658 | 74833 | CDS product major capsid protein  | 70866-70885 | 4:01:01 | GGAGCTTGGGCTCTCGGTGG        |
| 70978                                     | 70998 | 70658 | 74833 | CDS product major capsid protein  | 70978-70998 | 4:01:01 | CCACACCCGGTGGACCAGCCC       |
| 71085                                     | 71119 | 70658 | 74833 | CDS product major capsid protein  | 71085-71119 | 7:04:01 |                             |
| GGAGGAGGCGCCGACGGGACGCAGGTCTCGTCGG        |       |       |       |                                   |             |         |                             |
| 71283                                     | 71296 | 70658 | 74833 | CDS product major capsid protein  | 71283-71296 | 4:01:01 | GGCGGGACCGGCGG              |
| 71415                                     | 71437 | 70658 | 74833 | CDS product major capsid protein  | 71415-71437 | 4:01:01 | GGGCTGCACGCCCGCCTCGGTGG     |
| 71426                                     | 71449 | 70658 | 74833 | CDS product major capsid protein  | 71426-71449 | 5:02:01 | CCGCCTCGGTGGCCGTGCCGCGCC    |
| 71470                                     | 71507 | 70658 | 74833 | CDS product major capsid protein  | 71470-71507 | 7:04:01 |                             |
| GGGCGCCCGGTGGACGGCGTGCTGGTGACGACGGCGGG    |       |       |       |                                   |             |         |                             |
| 71519                                     | 71560 | 70658 | 74833 | CDS product major capsid protein  | 71519-71560 | 8:05:02 |                             |
| GGCTGCTGGGCGCGTGCTGGCGCTGGCCGACTCGGAGGCGG |       |       |       |                                   |             |         |                             |
| 71670                                     | 71707 | 70658 | 74833 | CDS product major capsid protein  | 71670-71707 | 7:04:01 |                             |
| GGGGCTGGAGGGGACCGCGGGCCCGGGGCTGGCCGTGG    |       |       |       |                                   |             |         |                             |
| 71745                                     | 71772 | 70658 | 74833 | CDS product major capsid protein  | 71745-71772 | 6:03:01 | GGCGGACCTGGTGGCCGTGGGGACCGG |
| 71926                                     | 71948 | 70658 | 74833 | CDS product major capsid protein  | 71926-71948 | 5:02:01 | CCGCCGCCCGGGCACCCCGACCC     |
| 72054                                     | 72076 | 70658 | 74833 | CDS product major capsid protein  | 72054-72076 | 5:02:01 | GGACGTGGACCCGGTGCTGGCGG     |
| 72101                                     | 72117 | 70658 | 74833 | CDS product major capsid protein  | 72101-72117 | 4:01:01 | GGCGAGAGGCGGAGTGG           |
| 72148                                     | 72177 | 70658 | 74833 | CDS product major capsid protein  | 72148-72177 | 5:02:01 |                             |
| GGCGAGCAGGAGCTCGCGGACCAGGTGCGG            |       |       |       |                                   |             |         |                             |
| 72249                                     | 72269 | 70658 | 74833 | CDS product major capsid protein  | 72249-72269 | 4:01:01 | GGAGCAGATGGTGGCGCCCGG       |

|                                                                 |       |       |       |                                  |             |          |                              |
|-----------------------------------------------------------------|-------|-------|-------|----------------------------------|-------------|----------|------------------------------|
| 72318                                                           | 72345 | 70658 | 74833 | CDS product major capsid protein | 72318-72345 | 4:01:01  | GGGGCCCGCGGACGTGGAGCTGCCGGGG |
| 72340                                                           | 72359 | 70658 | 74833 | CDS product major capsid protein | 72340-72359 | 5:02:01  | CCGGGGCCGCCCAACCCGCC         |
| 72489                                                           | 72512 | 70658 | 74833 | CDS product major capsid protein | 72489-72512 | 6:03:01  | GGCGACGGTGGCGCGGTGCGCGG      |
| 72720                                                           | 72751 | 70658 | 74833 | CDS product major capsid protein | 72720-72751 | 5:02:01  |                              |
| GGACTGCACGGCGGTCTACAAGGACCTCCTGG                                |       |       |       |                                  |             |          |                              |
| 72855                                                           | 72872 | 70658 | 74833 | CDS product major capsid protein | 72855-72872 | 4:01:01  | CCCGGCGCTCCCGCCGCC           |
| 73042                                                           | 73056 | 70658 | 74833 | CDS product major capsid protein | 73042-73056 | 4:01:01  | GGCGGCGCCCCGGG               |
| 73188                                                           | 73210 | 70658 | 74833 | CDS product major capsid protein | 73188-73210 | 4:01:01  | GGTGCAGTCGGTCGTGGTCCCGG      |
| 73206                                                           | 73221 | 70658 | 74833 | CDS product major capsid protein | 73206-73221 | 4:01:01  | CCCGGACCTGCCCCC              |
| 73231                                                           | 73293 | 70658 | 74833 | CDS product major capsid protein | 73231-73293 | 10:07:02 |                              |
| CCGCCCCGGGCCCCGAGCACCCGCGCCACCCGCTGCACCCGGCGAACCTGGTGGCCAACCTCC |       |       |       |                                  |             |          |                              |
| 73395                                                           | 73409 | 70658 | 74833 | CDS product major capsid protein | 73395-73409 | 5:02:01  | GGTGGTGGAGGCGGG              |
| 73565                                                           | 73579 | 70658 | 74833 | CDS product major capsid protein | 73565-73579 | 4:01:01  | CCTGCCCCGACCACC              |
| 73594                                                           | 73626 | 70658 | 74833 | CDS product major capsid protein | 73594-73626 | 6:03:01  |                              |
| GGGCTGGGCCAGGACGCGCTGGCGGCCGCGCGG                               |       |       |       |                                  |             |          |                              |
| 73809                                                           | 73837 | 70658 | 74833 | CDS product major capsid protein | 73809-73837 | 5:02:01  |                              |
| GGGCTTCGGGCTCACGGTCGTGCGGCAGG                                   |       |       |       |                                  |             |          |                              |
| 73923                                                           | 73941 | 70658 | 74833 | CDS product major capsid protein | 73923-73941 | 4:01:01  | GGCAGTCGGCGGCGTCGGG          |
| 73971                                                           | 73996 | 70658 | 74833 | CDS product major capsid protein | 73971-73996 | 5:02:01  | GGACCTCGGCGTGGGCTACACGGCGG   |
| 73997                                                           | 74013 | 70658 | 74833 | CDS product major capsid protein | 73997-74013 | 4:01:01  | CCTACGCCCGCGGGCC             |
| 74085                                                           | 74105 | 70658 | 74833 | CDS product major capsid protein | 74085-74105 | 4:01:01  | GGTGAACGGGGACGCGGACGG        |
| 74136                                                           | 74162 | 70658 | 74833 | CDS product major capsid protein | 74136-74162 | 5:02:01  | CCGCATCCGGCCACAGGGCCCCGCGCC  |
| 74173                                                           | 74192 | 70658 | 74833 | CDS product major capsid protein | 74173-74192 | 4:01:01  | CCCATCATGCCGGCCGCGCC         |

|                                                  |       |       |       |                                      |
|--------------------------------------------------|-------|-------|-------|--------------------------------------|
| 74196                                            | 74221 | 70658 | 74833 | CDS product major capsid protein     |
| 74290                                            | 74308 | 70658 | 74833 | CDS product major capsid protein     |
| 74355                                            | 74409 | 70658 | 74833 | CDS product major capsid protein     |
| CCACGGCCAGGGCGACCCGGCACCCGCGCCACCGTGAACCCGTGGGCC |       |       |       |                                      |
| 74508                                            | 74527 | 70658 | 74833 | CDS product major capsid protein     |
| 74553                                            | 74567 | 70658 | 74833 | CDS product major capsid protein     |
| 74617                                            | 74638 | 70658 | 74833 | CDS product major capsid protein     |
| 74706                                            | 74731 | 70658 | 74833 | CDS product major capsid protein     |
| 74736                                            | 74768 | 70658 | 74833 | CDS product major capsid protein     |
| GGGCGCGCCGCCGAGGGCCGGCTGGAGGAGGG                 |       |       |       |                                      |
| 74784                                            | 74804 | 70658 | 74833 | CDS product major capsid protein     |
| 74977                                            | 75014 | 74940 | 75890 | CDS product capsid triplex subunit 2 |
| CCCCGGCGACCTCTCCACAGCGACCTGGCCGCCCTCC            |       |       |       |                                      |
| 75070                                            | 75086 | 74940 | 75890 | CDS product capsid triplex subunit 2 |
| 75135                                            | 75160 | 74940 | 75890 | CDS product capsid triplex subunit 2 |
| CCGCCTACCGCTGCCGGTTCCCGGCC                       |       |       |       |                                      |
| 75325                                            | 75341 | 74940 | 75890 | CDS product capsid triplex subunit 2 |
| 75388                                            | 75437 | 74940 | 75890 | CDS product capsid triplex subunit 2 |
| GGTGGCGCGCTGGTGGCGCGCGGTGGAGGCGCTGGGGGACCGCGGGG  |       |       |       |                                      |
| 75430                                            | 75450 | 74940 | 75890 | CDS product capsid triplex subunit 2 |
| 75622                                            | 75641 | 74940 | 75890 | CDS product capsid triplex subunit 2 |
| 75697                                            | 75714 | 74940 | 75890 | CDS product capsid triplex subunit 2 |
| 75717                                            | 75733 | 74940 | 75890 | CDS product capsid triplex subunit 2 |

|             |          |                           |
|-------------|----------|---------------------------|
| 74196-74221 | 5:02:01  | GGGCACGGCGCGGGCAGGCCGCGG  |
| 74290-74308 | 4:01:01  | GGGCGCTCGCGGGCGCGG        |
| 74355-74409 | 9:06:02  |                           |
| 74508-74527 | 5:02:01  | GGCGGAGGTGTCGGCCAAGG      |
| 74553-74567 | 4:01:01  | GGAGGTGGGCGCGGG           |
| 74617-74638 | 4:01:01  | GGCACCAGGGGAGCTCGTGGAGG   |
| 74706-74731 | 5:02:01  | CCGCCTCGCCGCGGGCGCCGCGCCC |
| 74736-74768 | 7:04:01  |                           |
| 74784-74804 | 4:01:01  | CCTGATCCGCGACGCCTCGCC     |
| 74977-75014 | 7:04:01  |                           |
| 75070-75086 | 4:01:01  | GGCGGACGTGGCGCTGG         |
| 75135-75160 | 6:03:01  |                           |
| 75325-75341 | 4:01:01  | GGCCTCGGCGGGCGCGG         |
| 75388-75437 | 10:07:02 |                           |
| 75430-75450 | 4:01:01  | CCGCGGGGCCGCCGCGGCCCC     |
| 75622-75641 | 4:01:01  | GGGCCTGCAGGACGGCGTGG      |
| 75697-75714 | 4:01:01  | CCTGGAGCCGGCCGAGCC        |
| 75717-75733 | 4:01:01  | GGGAGGACGGCAGACGG         |

|                                                 |       |       |       |                                               |                      |                    |
|-------------------------------------------------|-------|-------|-------|-----------------------------------------------|----------------------|--------------------|
| 75749                                           | 75766 | 74940 | 75890 | CDS product capsid triplex subunit 2          | 75749-75766 4:01:01  | GGGGCGCTGGCGGCCTGG |
| 75775                                           | 75801 | 74940 | 75890 | CDS product capsid triplex subunit 2          | 75775-75801 6:03:01  |                    |
| GGCGACCCGGCTGGGGACGCGGTCGG                      |       |       |       |                                               |                      |                    |
| 75836                                           | 75866 | 74940 | 75890 | CDS product capsid triplex subunit 2          | 75836-75866 5:02:01  |                    |
| GGGCCCTCGGTGGTGCGCACGGGCGAGAAGG                 |       |       |       |                                               |                      |                    |
| 76107                                           | 76154 | 76098 | 81708 | CDS product DNA packaging terminase subunit 1 | 76107-76154 10:07:02 |                    |
| GGCGGACGGGCGGCCAGCGGGCGAAGGCGCTGTCGGTGGGCGGGAGG |       |       |       |                                               |                      |                    |
| 76171                                           | 76187 | 76098 | 81708 | CDS product DNA packaging terminase subunit 1 | 76171-76187 4:01:01  |                    |
| CCATCACCAGCGCCACC                               |       |       |       |                                               |                      |                    |
| 76220                                           | 76265 | 76098 | 81708 | CDS product DNA packaging terminase subunit 1 | 76220-76265 8:05:02  |                    |
| GGAGAAGGCCCGGGCCTCGCCGGGCGGCGGTGCTCTCGGTCAGG    |       |       |       |                                               |                      |                    |
| 76228                                           | 76246 | 76098 | 81708 | CDS product DNA packaging terminase subunit 1 | 76228-76246 4:01:01  |                    |
| CCCGGGCCTCGCCGGGGCC                             |       |       |       |                                               |                      |                    |
| 76309                                           | 76331 | 76098 | 81708 | CDS product DNA packaging terminase subunit 1 | 76309-76331 4:01:01  |                    |
| GGCGCATGGTCAGCGAGGCCAGG                         |       |       |       |                                               |                      |                    |
| 76327                                           | 76354 | 76098 | 81708 | CDS product DNA packaging terminase subunit 1 | 76327-76354 5:02:01  |                    |
| CCAGGTCCTGCGAGGCCACCACGCGCCC                    |       |       |       |                                               |                      |                    |
| 76369                                           | 76389 | 76098 | 81708 | CDS product DNA packaging terminase subunit 1 | 76369-76389 4:01:01  |                    |
| GGATGAAGTGGTCAAAGGCGG                           |       |       |       |                                               |                      |                    |
| 76440                                           | 76454 | 76098 | 81708 | CDS product DNA packaging terminase subunit 1 | 76440-76454 4:01:01  | GGTGGGCGGCAGTGG    |
| 76469                                           | 76497 | 76098 | 81708 | CDS product DNA packaging terminase subunit 1 | 76469-76497 7:04:01  |                    |
| GGCGGGCATGGGCACGGCCCCGGAGGCGG                   |       |       |       |                                               |                      |                    |
| 76582                                           | 76608 | 76098 | 81708 | CDS product DNA packaging terminase subunit 1 | 76582-76608 5:02:01  |                    |



|                                       |       |       |       |                                                 |                                     |
|---------------------------------------|-------|-------|-------|-------------------------------------------------|-------------------------------------|
| GGCCGTCGAGGCGGCGCCGGTGCACGG           |       |       |       |                                                 |                                     |
| 76693                                 | 76730 | 76098 | 81708 | CDS product DNA packaging terminase subunit 1   | 76693-76730 7:04:01                 |
| CCAGGCCAGCACCAGCCAGCTGCCGCGGTGCCGCCCC |       |       |       |                                                 |                                     |
| 76736                                 | 76761 | 76098 | 81708 | CDS product DNA packaging terminase subunit 1   | 76736-76761 5:02:01                 |
| GGCGATGCCGGAGCCGGAGGCGCGGG            |       |       |       |                                                 |                                     |
| 76832                                 | 76850 | 76098 | 81708 | CDS product DNA packaging terminase subunit 1   | 76832-76850 4:01:01                 |
| GGAGGGCCGGTAGAGCAGG                   |       |       |       |                                                 |                                     |
| 76870                                 | 76898 | 76098 | 81708 | CDS product DNA packaging terminase subunit 1   | 76870-76898 5:02:01                 |
| GGGTGAACACGGCCGCGGGCTCGGCCCGG         |       |       |       |                                                 |                                     |
| 76906                                 | 76918 | 76098 | 81708 | CDS product DNA packaging terminase subunit 1   | 76906-76918 4:01:01 CCTCGCCGCCGCC   |
| 76943                                 | 76962 | 76098 | 81708 | CDS product DNA packaging terminase subunit 1   | 76943-76962 5:02:01                 |
| GGGCAGGAAGGTCTCGGCGG                  |       |       |       |                                                 |                                     |
| 77034                                 | 77048 | 76098 | 81708 | CDS product DNA packaging terminase subunit 1   | 77034-77048 4:01:01 CCGCCGTGCGCCGCC |
| 77138                                 | 77160 | 76098 | 81708 | CDS product DNA packaging terminase subunit 1   | 77138-77160 4:01:01                 |
| GGCCTTGCCGGTGTGGTCGAGG                |       |       |       |                                                 |                                     |
| 77212                                 | 77228 | 76098 | 81708 | CDS product DNA packaging terminase subunit 1   | 77212-77228 4:01:01                 |
| GGACGGCCTCGGGGCGG                     |       |       |       |                                                 |                                     |
| 77326                                 | 77363 | 76098 | 81708 | CDS product DNA packaging terminase subunit 1   | 77326-77363 8:05:02                 |
| GGCGGGCCCGGGCCGGCGGCCGCGCCATGGAGG     |       |       |       |                                                 |                                     |
| 77331                                 | 77356 | 76098 | 81708 | CDS product DNA packaging terminase subunit 1   | 77331-77356 5:02:01                 |
| CCCCGGGCCCCGGCCGGCCGCGGCC             |       |       |       |                                                 |                                     |
| 77404                                 | 77432 | 77358 | 79481 | CDS product DNA packaging tegument protein UL17 | 77404-77432 5:02:01                 |
| CCGCGGCGCCGCAAACACGTCGTCCACC          |       |       |       |                                                 |                                     |

|                            |       |       |       |                                                 |                                    |
|----------------------------|-------|-------|-------|-------------------------------------------------|------------------------------------|
| 77457                      | 77479 | 77358 | 79481 | CDS product DNA packaging tegument protein UL17 | 77457-77479 5:02:01                |
| GGGCCGCGGGGCGGACCCCGG      |       |       |       |                                                 |                                    |
| 77493                      | 77506 | 77358 | 79481 | CDS product DNA packaging tegument protein UL17 | 77493-77506 4:01:01 CCGCCGCTCCCGCC |
| 77509                      | 77528 | 77358 | 79481 | CDS product DNA packaging tegument protein UL17 | 77509-77528 6:03:01                |
| GGCGGAGGCGGCCCTGGGGG       |       |       |       |                                                 |                                    |
| 77666                      | 77691 | 77358 | 79481 | CDS product DNA packaging tegument protein UL17 | 77666-77691 5:02:01                |
| CCCACGCAGCCCGCGGACCGGCCGCC |       |       |       |                                                 |                                    |
| 77700                      | 77716 | 77358 | 79481 | CDS product DNA packaging tegument protein UL17 | 77700-77716 4:01:01                |
| CCGCCCGCTCGGCGCC           |       |       |       |                                                 |                                    |
| 77711                      | 77728 | 77358 | 79481 | CDS product DNA packaging tegument protein UL17 | 77711-77728 4:01:01                |
| GGCGCCGACGGCGGCGGG         |       |       |       |                                                 |                                    |
| 77808                      | 77826 | 77358 | 79481 | CDS product DNA packaging tegument protein UL17 | 77808-77826 4:01:01                |
| GGCTGGAGATGCCGACGG         |       |       |       |                                                 |                                    |
| 77944                      | 77968 | 77358 | 79481 | CDS product DNA packaging tegument protein UL17 | 77944-77968 7:04:01                |
| CCACGCCGGCCTGCCGCCCGCGCC   |       |       |       |                                                 |                                    |
| 77989                      | 78012 | 77358 | 79481 | CDS product DNA packaging tegument protein UL17 | 77989-78012 6:03:01                |
| GGAGGCCTGCCTGGTGGAGGGCGG   |       |       |       |                                                 |                                    |
| 78013                      | 78034 | 77358 | 79481 | CDS product DNA packaging tegument protein UL17 | 78013-78034 5:02:01                |
| CCGCGCGCCCGCTGCCGCC        |       |       |       |                                                 |                                    |
| 78035                      | 78053 | 77358 | 79481 | CDS product DNA packaging tegument protein UL17 | 78035-78053 4:01:01                |
| GGCGGGCGGGTCTGCCCGG        |       |       |       |                                                 |                                    |
| 78085                      | 78104 | 77358 | 79481 | CDS product DNA packaging tegument protein UL17 | 78085-78104 4:01:01                |
| CCCGGCCGAGTCGCCCGCC        |       |       |       |                                                 |                                    |

|                                              |       |       |       |                                                 |                                      |
|----------------------------------------------|-------|-------|-------|-------------------------------------------------|--------------------------------------|
| 78151                                        | 78169 | 77358 | 79481 | CDS product DNA packaging tegument protein UL17 | 78151-78169 6:03:01                  |
| GGAGGTGGTGGCGGCGCGG                          |       |       |       |                                                 |                                      |
| 78214                                        | 78226 | 77358 | 79481 | CDS product DNA packaging tegument protein UL17 | 78214-78226 4:01:01 GGTGGCGGCGGGG    |
| 78260                                        | 78278 | 77358 | 79481 | CDS product DNA packaging tegument protein UL17 | 78260-78278 4:01:01                  |
| GGCGCGGCGGCCGCGCCGG                          |       |       |       |                                                 |                                      |
| 78270                                        | 78301 | 77358 | 79481 | CDS product DNA packaging tegument protein UL17 | 78270-78301 6:03:01                  |
| CCGCGCCGGCGCTGCCCCCGACGCCGCGGCC              |       |       |       |                                                 |                                      |
| 78311                                        | 78327 | 77358 | 79481 | CDS product DNA packaging tegument protein UL17 | 78311-78327 4:01:01                  |
| CCGGCGCCTGCCGGGCC                            |       |       |       |                                                 |                                      |
| 78341                                        | 78387 | 77358 | 79481 | CDS product DNA packaging tegument protein UL17 | 78341-78387 8:05:02                  |
| GGCGCCGCGAGCCCGGGCTCGGCGCCGTGGCGGGCGCTGGCGGG |       |       |       |                                                 |                                      |
| 78400                                        | 78422 | 77358 | 79481 | CDS product DNA packaging tegument protein UL17 | 78400-78422 5:02:01                  |
| GGCGACGGCGGCGACCCGGCGGG                      |       |       |       |                                                 |                                      |
| 78577                                        | 78592 | 77358 | 79481 | CDS product DNA packaging tegument protein UL17 | 78577-78592 4:01:01 GGCGGGCTGGGGCGGG |
| 78730                                        | 78753 | 77358 | 79481 | CDS product DNA packaging tegument protein UL17 | 78730-78753 4:01:01                  |
| GGCGGCGCCGCTGGGCGAGCCCGG                     |       |       |       |                                                 |                                      |
| 78749                                        | 78775 | 77358 | 79481 | CDS product DNA packaging tegument protein UL17 | 78749-78775 5:02:01                  |
| CCCGGCGACCGCCGCCCGTGGAGGCC                   |       |       |       |                                                 |                                      |
| 78816                                        | 78839 | 77358 | 79481 | CDS product DNA packaging tegument protein UL17 | 78816-78839 4:01:01                  |
| GGGCGGCGTGCGCGGGCGCGCTGG                     |       |       |       |                                                 |                                      |
| 78858                                        | 78893 | 77358 | 79481 | CDS product DNA packaging tegument protein UL17 | 78858-78893 6:03:01                  |
| CCTGCGAGGCCCGCCCGACCTGCCCCAGCGCTTCC          |       |       |       |                                                 |                                      |
| 78920                                        | 78943 | 77358 | 79481 | CDS product DNA packaging tegument protein UL17 | 78920-78943 5:02:01                  |

|                                                            |       |       |       |                                                 |                                                |
|------------------------------------------------------------|-------|-------|-------|-------------------------------------------------|------------------------------------------------|
| GGGTGCCTGGAGGACGTGGCGCGG                                   |       |       |       |                                                 |                                                |
| 78970                                                      | 79001 | 77358 | 79481 | CDS product DNA packaging tegument protein UL17 | 78970-79001 6:03:01                            |
| GGCCGGCGCGCTGGGGGCGCTCTCGGCGCGGG                           |       |       |       |                                                 |                                                |
| 79027                                                      | 79037 | 77358 | 79481 | CDS product DNA packaging tegument protein UL17 | 79027-79037 4:01:01 GGCGGCGGTGG                |
| 79057                                                      | 79093 | 77358 | 79481 | CDS product DNA packaging tegument protein UL17 | 79057-79093 8:05:02                            |
| CCCTGACGGCCCCGGCCTCCTGCCGTACCACCGCGCC                      |       |       |       |                                                 |                                                |
| 79151                                                      | 79169 | 77358 | 79481 | CDS product DNA packaging tegument protein UL17 | 79151-79169 4:01:01                            |
| GGCGGGGAGGTGATCAAGG                                        |       |       |       |                                                 |                                                |
| 79189                                                      | 79224 | 77358 | 79481 | CDS product DNA packaging tegument protein UL17 | 79189-79224 7:04:01                            |
| GGCCACGACGGCGCAGGAGCCCGGGCGGCGGTGGG                        |       |       |       |                                                 |                                                |
| 79368                                                      | 79394 | 77358 | 79481 | CDS product DNA packaging tegument protein UL17 | 79368-79394 4:01:01                            |
| CCCTGGAGGCCGACGTCGCCGCACACC                                |       |       |       |                                                 |                                                |
| 79396                                                      | 79411 | 77358 | 79481 | CDS product DNA packaging tegument protein UL17 | 79396-79411 4:01:01 GGACTGGCCGGCGCGG           |
| 79420                                                      | 79440 | 77358 | 79481 | CDS product DNA packaging tegument protein UL17 | 79420-79440 5:02:01                            |
| GGCGGTGCTCGGGCGGCTGGG                                      |       |       |       |                                                 |                                                |
| 79441                                                      | 79476 | 77358 | 79481 | CDS product DNA packaging tegument protein UL17 | 79441-79476 8:05:02                            |
| CCGCCCCCTCCCCGCGCCCCCGCGCGCCGCCCC                          |       |       |       |                                                 |                                                |
| 79511                                                      | 79527 | 79508 | 80539 | CDS product tegument protein UL16               | 79511-79527 4:01:01 CCGAGGACCCCGCCGCC          |
| 79671                                                      | 79696 | 79508 | 80539 | CDS product tegument protein UL16               | 79671-79696 5:02:01 CCCTGGCGCCGCCGTCCGCGTCACCC |
| 79859                                                      | 79917 | 79508 | 80539 | CDS product tegument protein UL16               | 79859-79917 11:08:02                           |
| CCGTCCCCGTGCCGCCGACGTTCCCGACCCGAGCGCCGAGGCCTTGCCGCCCGCGCCC |       |       |       |                                                 |                                                |
| 80054                                                      | 80076 | 79508 | 80539 | CDS product tegument protein UL16               | 80054-80076 4:01:01 CCCTGCTGGCCCTGTGCCCCGCC    |
| 80098                                                      | 80115 | 79508 | 80539 | CDS product tegument protein UL16               | 80098-80115 4:01:01 GGGGGCGTGCTCGGGCGG         |

|                                                   |       |       |       |                                               |                      |                       |
|---------------------------------------------------|-------|-------|-------|-----------------------------------------------|----------------------|-----------------------|
| 80211                                             | 80230 | 79508 | 80539 | CDS product tegument protein UL16             | 80211-80230 4:01:01  | CCCGTGC GCCGCGCCGTGCC |
| 80328                                             | 80357 | 79508 | 80539 | CDS product tegument protein UL16             | 80328-80357 5:02:01  |                       |
| GGGCTCGCGGCGCCGCGGATCACGGG                        |       |       |       |                                               |                      |                       |
| 80376                                             | 80427 | 79508 | 80539 | CDS product tegument protein UL16             | 80376-80427 9:06:02  |                       |
| GGCGGGCGTCGGGCCGCGGGGAGGTCGTGCCGTGAACGGCGCCGGCTGG |       |       |       |                                               |                      |                       |
| 80646                                             | 80663 | 76098 | 81708 | CDS product DNA packaging terminase subunit 1 | 80646-80663 5:02:01  |                       |
| CCTTTCCCCCACC                                     |       |       |       |                                               |                      |                       |
| 80779                                             | 80811 | 76098 | 81708 | CDS product DNA packaging terminase subunit 1 | 80779-80811 6:03:01  |                       |
| CCGAACCACTGCCGGAGCCGCCACGATCTCC                   |       |       |       |                                               |                      |                       |
| 80920                                             | 80959 | 76098 | 81708 | CDS product DNA packaging terminase subunit 1 | 80920-80959 7:04:01  |                       |
| CCGTGCCGCCGCGGCACCAGGAACACCGTGGCCCGCTGCC          |       |       |       |                                               |                      |                       |
| 81167                                             | 81185 | 76098 | 81708 | CDS product DNA packaging terminase subunit 1 | 81167-81185 4:01:01  |                       |
| CCGCGCCGTCGTGCCGCC                                |       |       |       |                                               |                      |                       |
| 81205                                             | 81223 | 76098 | 81708 | CDS product DNA packaging terminase subunit 1 | 81205-81223 4:01:01  |                       |
| CCCACCAGCCGGCTGAACC                               |       |       |       |                                               |                      |                       |
| 81314                                             | 81324 | 76098 | 81708 | CDS product DNA packaging terminase subunit 1 | 81314-81324 4:01:01  | CCGCCGCCTCC           |
| 81355                                             | 81375 | 76098 | 81708 | CDS product DNA packaging terminase subunit 1 | 81355-81375 4:01:01  |                       |
| CCCAGGGCCCCGCGAGCTCC                              |       |       |       |                                               |                      |                       |
| 81446                                             | 81463 | 76098 | 81708 | CDS product DNA packaging terminase subunit 1 | 81446-81463 5:02:01  |                       |
| GGCGGGAGCCGTGGCGG                                 |       |       |       |                                               |                      |                       |
| 81524                                             | 81547 | 76098 | 81708 | CDS product DNA packaging terminase subunit 1 | 81524-81547 5:02:01  |                       |
| GGTGGCGCTTGGGGCCGCGACGG                           |       |       |       |                                               |                      |                       |
| 81578                                             | 81629 | 76098 | 81708 | CDS product DNA packaging terminase subunit 1 | 81578-81629 11:08:02 |                       |

|                                                     |       |       |       |                                                      |                                             |
|-----------------------------------------------------|-------|-------|-------|------------------------------------------------------|---------------------------------------------|
| CCTCCCCGCGGGCCCCGCCGCTGCCGCCACCCTCGGCCCGCGCCCCCGCCC |       |       |       |                                                      |                                             |
| 81772                                               | 81808 | 81771 | 82445 | CDS product tegument protein UL14                    | 81772-81808 6:03:01                         |
| GGCGACGGCGGCTCGCGGGAGACCCGGCGCCGGGG                 |       |       |       |                                                      |                                             |
| 81828                                               | 81845 | 81771 | 82445 | CDS product tegument protein UL14                    | 81828-81845 5:02:01 GGCGGCGGCTGCGGCTGG      |
| 81905                                               | 81926 | 81771 | 82445 | CDS product tegument protein UL14                    | 81905-81926 4:01:01 GGCGGACCCGGGACGACCCGG   |
| 81973                                               | 81995 | 81771 | 82445 | CDS product tegument protein UL14                    | 81973-81995 5:02:01 GGGGGGCGAGATCCGGGCGGCGG |
| 82047                                               | 82078 | 81771 | 82445 | CDS product tegument protein UL14                    | 82047-82078 6:03:01                         |
| CCGCCCCAAGCGGCCGTGGCCGCCGTGCTGGCC                   |       |       |       |                                                      |                                             |
| 82144                                               | 82164 | 81771 | 82445 | CDS product tegument protein UL14                    | 82144-82164 4:01:01 GGACCAGGAGGAGCGCATGGG   |
| 82177                                               | 82223 | 81771 | 82445 | CDS product tegument protein UL14                    | 82177-82223 9:06:02                         |
| GGACTGCGGGGGCGACGTGGGCGTGGGCGGGGCCTGGCTGGACGGGG     |       |       |       |                                                      |                                             |
| 82316                                               | 82331 | 81771 | 82445 | CDS product tegument protein UL14                    | 82316-82331 4:01:01 GGAGGGCTCGCGGTGG        |
| 82366                                               | 82396 | 81771 | 82445 | CDS product tegument protein UL14                    | 82366-82396 8:05:02                         |
| GGCGGCGGCAGCGGCGGCGGGCCAGGCTGGG                     |       |       |       |                                                      |                                             |
| 82424                                               | 82455 | 82354 | 83841 | CDS product tegument serine/threonine protein kinase | 82424-82455 7:04:01                         |
| CCGCCCCACAGCACCCCTGACCCCCCGCACC                     |       |       |       |                                                      |                                             |
| 82468                                               | 82486 | 82354 | 83841 | CDS product tegument serine/threonine protein kinase | 82468-82486 5:02:01                         |
| CCCCCGCCTCCGGCGCGCC                                 |       |       |       |                                                      |                                             |
| 82524                                               | 82553 | 82354 | 83841 | CDS product tegument serine/threonine protein kinase | 82524-82553 7:04:01                         |
| CCGCCCTCGCCGCTCGGGCCCGCGATCC                        |       |       |       |                                                      |                                             |
| 82562                                               | 82590 | 82354 | 83841 | CDS product tegument serine/threonine protein kinase | 82562-82590 6:03:01                         |
| CCGTGCGCCGATCCGCCCCGCGAGCCGCC                       |       |       |       |                                                      |                                             |
| 82722                                               | 82739 | 82354 | 83841 | CDS product tegument serine/threonine protein kinase | 82722-82739 4:01:01                         |

|                                           |       |       |       |                                                      |             |                                     |
|-------------------------------------------|-------|-------|-------|------------------------------------------------------|-------------|-------------------------------------|
| GGGGCCGGCGGCTACGGG                        |       |       |       |                                                      |             |                                     |
| 82759                                     | 82781 | 82354 | 83841 | CDS product tegument serine/threonine protein kinase | 82759-82781 | 4:01:01                             |
| CCGCCGGCGTGGCCGTAAAGACC                   |       |       |       |                                                      |             |                                     |
| 82870                                     | 82888 | 82354 | 83841 | CDS product tegument serine/threonine protein kinase | 82870-82888 | 4:01:01                             |
| CCGACGCCATCATCCGGCC                       |       |       |       |                                                      |             |                                     |
| 82940                                     | 82970 | 82354 | 83841 | CDS product tegument serine/threonine protein kinase | 82940-82970 | 7:04:01                             |
| GGACCTGGTGGCCTACGCGGAGGCGGCGGGG           |       |       |       |                                                      |             |                                     |
| 82975                                     | 82991 | 82354 | 83841 | CDS product tegument serine/threonine protein kinase | 82975-82991 | 4:01:01                             |
| CCGTCCTGTCGCCCCGCC                        |       |       |       |                                                      |             |                                     |
| 83267                                     | 83296 | 82354 | 83841 | CDS product tegument serine/threonine protein kinase | 83267-83296 | 6:03:01                             |
| CCTGCCGCCCCGACGCCCGGATGCCAGACCC           |       |       |       |                                                      |             |                                     |
| 83342                                     | 83367 | 82354 | 83841 | CDS product tegument serine/threonine protein kinase | 83342-83367 | 4:01:01                             |
| CCTCGACTTCCTTAACCGGCACGGCC                |       |       |       |                                                      |             |                                     |
| 83378                                     | 83400 | 82354 | 83841 | CDS product tegument serine/threonine protein kinase | 83378-83400 | 4:01:01                             |
| CCCCGAGCCGCTGCCCGCGGACC                   |       |       |       |                                                      |             |                                     |
| 83538                                     | 83567 | 82354 | 83841 | CDS product tegument serine/threonine protein kinase | 83538-83567 | 5:02:01                             |
| GGGCTGGTCATCGGCATTCTGGCGCACCGG            |       |       |       |                                                      |             |                                     |
| 83642                                     | 83682 | 82354 | 83841 | CDS product tegument serine/threonine protein kinase | 83642-83682 | 7:04:01                             |
| GGTCGTGCGGGCGGCCATCGGCAACGTGGCGGTCCGCGCGG |       |       |       |                                                      |             |                                     |
| 83675                                     | 83699 | 82354 | 83841 | CDS product tegument serine/threonine protein kinase | 83675-83699 | 4:01:01                             |
| CCGCGCGCCTTCGACCGCACTACC                  |       |       |       |                                                      |             |                                     |
| 83947                                     | 83973 | 83838 | 85301 | CDS product deoxyribonuclease                        | 83947-83973 | 6:03:01 GGCCGAGGCGGCGGGCGAAGGCGACGG |
| 84043                                     | 84067 | 83838 | 85301 | CDS product deoxyribonuclease                        | 84043-84067 | 5:02:01 GGCCGCGGCGCGCGGCGCCCGGGG    |

|                                                                   |       |       |       |                                           |                                                     |
|-------------------------------------------------------------------|-------|-------|-------|-------------------------------------------|-----------------------------------------------------|
| 84087                                                             | 84109 | 83838 | 85301 | CDS product deoxyribonuclease             | 84087-84109 5:02:01 CCGCGACCCGCGGCCAGGCCGCC         |
| 84120                                                             | 84184 | 83838 | 85301 | CDS product deoxyribonuclease             | 84120-84184 10:07:02                                |
| GGTGGCTGCTCCGGCGGAGCCTGGCCACGGCCTCGTCGGTCCGCTGGGGCGCCGCCGCCCCGCGG |       |       |       |                                           |                                                     |
| 84130                                                             | 84151 | 83838 | 85301 | CDS product deoxyribonuclease             | 84130-84151 4:01:01 CCGCGGAGCCTGGCCACGGCC           |
| 84171                                                             | 84186 | 83838 | 85301 | CDS product deoxyribonuclease             | 84171-84186 4:01:01 CCGCCGGCCCCGCGGCC               |
| 84295                                                             | 84319 | 83838 | 85301 | CDS product deoxyribonuclease             | 84295-84319 5:02:01 CCCGCCGCGACCTCCCGACGCC          |
| 84323                                                             | 84343 | 83838 | 85301 | CDS product deoxyribonuclease             | 84323-84343 6:03:01 GGGCTGGCGGACGGCGGGGG            |
| 84385                                                             | 84398 | 83838 | 85301 | CDS product deoxyribonuclease             | 84385-84398 4:01:01 GGCCGGGCGGCGG                   |
| 84409                                                             | 84428 | 83838 | 85301 | CDS product deoxyribonuclease             | 84409-84428 5:02:01 GGCGGGGCGGGCGCAGAGG             |
| 84435                                                             | 84456 | 83838 | 85301 | CDS product deoxyribonuclease             | 84435-84456 4:01:01 CCTGCGCCTCCTGATCGACCC           |
| 84527                                                             | 84544 | 83838 | 85301 | CDS product deoxyribonuclease             | 84527-84544 4:01:01 CCGCATCCACCCAGACC               |
| 84666                                                             | 84691 | 83838 | 85301 | CDS product deoxyribonuclease             | 84666-84691 5:02:01 CCTTCCTGCGGTCCGTGCGCCGCCCC      |
| 84716                                                             | 84743 | 83838 | 85301 | CDS product deoxyribonuclease             | 84716-84743 4:01:01 GGCTGCCCCGGCGCCGCGGAAGCGCTGG    |
| 84753                                                             | 84792 | 83838 | 85301 | CDS product deoxyribonuclease             | 84753-84792 9:06:02                                 |
| CCGACGCCTGGGCGCGCCCCCGCCTGCCGGCGCCGCACC                           |       |       |       |                                           |                                                     |
| 84912                                                             | 84929 | 83838 | 85301 | CDS product deoxyribonuclease             | 84912-84929 4:01:01 GGGACACCGCGAGGCGG               |
| 85000                                                             | 85035 | 83838 | 85301 | CDS product deoxyribonuclease             | 85000-85035 5:02:01                                 |
| CCTCGCGGGCCACTTCCCCGATCGCGCCGCGGCGCC                              |       |       |       |                                           |                                                     |
| 85102                                                             | 85115 | 83838 | 85301 | CDS product deoxyribonuclease             | 85102-85115 4:01:01 GGGGCCGGGGGCGG                  |
| 85233                                                             | 85264 | 83838 | 85301 | CDS product deoxyribonuclease             | 85233-85264 6:03:01 GGGCGCCGTCAAGGAGTCATGGGACAGGCGG |
| 85275                                                             | 85297 | 85253 | 85555 | CDS product myristylated tegument protein | 85275-85297 5:02:01                                 |
| CCGATGCCGCGCAACCGCATCC                                            |       |       |       |                                           |                                                     |
| 85309                                                             | 85333 | 85253 | 85555 | CDS product myristylated tegument protein | 85309-85333 4:01:01                                 |



|                                                     |       |       |       |                                           |                                               |
|-----------------------------------------------------|-------|-------|-------|-------------------------------------------|-----------------------------------------------|
| GGGGACCTCGTGGCCCTGGACGCGG                           |       |       |       |                                           |                                               |
| 85353                                               | 85407 | 85253 | 85555 | CDS product myristylated tegument protein | 85353-85407 9:06:02                           |
| CCTCGACGACCTGCAGGCCCTGACGACCGGGGCCGCCCGGGCTCCGGCTCC |       |       |       |                                           |                                               |
| 85395                                               | 85441 | 85253 | 85555 | CDS product myristylated tegument protein | 85395-85441 9:06:02                           |
| GGGCTCCGGCTCCGGCGGCAGCGCGGGCGCCAAGGACGGCGAGG        |       |       |       |                                           |                                               |
| 85459                                               | 85470 | 85253 | 85555 | CDS product myristylated tegument protein | 85459-85470 4:01:01 GGTGGCGGCTGG              |
| 85472                                               | 85495 | 85253 | 85555 | CDS product myristylated tegument protein | 85472-85495 6:03:01                           |
| CCGCCGTCGTGACCACGCCCCC                              |       |       |       |                                           |                                               |
| 85509                                               | 85540 | 85253 | 85555 | CDS product myristylated tegument protein | 85509-85540 6:03:01                           |
| CCCTCCCACGAAACCGTACCGCCGCAGCGCC                     |       |       |       |                                           |                                               |
| 85769                                               | 85784 | 85698 | 86957 | CDS product envelope glycoprotein M       | 85769-85784 4:01:01 GGCGGCGGCGCCGCGG          |
| 85796                                               | 85818 | 85698 | 86957 | CDS product envelope glycoprotein M       | 85796-85818 5:02:01 GGCGGCGTCGTCGGTGGCGCCGG   |
| 85924                                               | 85938 | 85698 | 86957 | CDS product envelope glycoprotein M       | 85924-85938 4:01:01 GGTGGTGCAGGCAGG           |
| 85964                                               | 85989 | 85698 | 86957 | CDS product envelope glycoprotein M       | 85964-85989 4:01:01 GGCCACGGCCAGCAGGGCGACCCGG |
| 86006                                               | 86025 | 85698 | 86957 | CDS product envelope glycoprotein M       | 86006-86025 4:01:01 GGCCAGCGGCAGCCCGGGGG      |
| 86167                                               | 86186 | 85698 | 86957 | CDS product envelope glycoprotein M       | 86167-86186 5:02:01 GGAGGAGCACGGCGGCGAGG      |
| 86290                                               | 86306 | 85698 | 86957 | CDS product envelope glycoprotein M       | 86290-86306 4:01:01 CCAGCAGACCGCCGGCC         |
| 86321                                               | 86357 | 85698 | 86957 | CDS product envelope glycoprotein M       | 86321-86357 6:03:01                           |
| GGCGCGCCCGGGGCCAGCAGGCGGTGGGCGCGCGG                 |       |       |       |                                           |                                               |
| 86435                                               | 86451 | 85698 | 86957 | CDS product envelope glycoprotein M       | 86435-86451 5:02:01 GGCGGCGGCGGCGCCGG         |
| 86461                                               | 86484 | 85698 | 86957 | CDS product envelope glycoprotein M       | 86461-86484 6:03:01 GGTAGGTGGCCGCGGCCAGGACGG  |
| 86657                                               | 86682 | 85698 | 86957 | CDS product envelope glycoprotein M       | 86657-86682 4:01:01 GGCCGCGACGCGAGCAGGAACAGGG |
| 86683                                               | 86705 | 85698 | 86957 | CDS product envelope glycoprotein M       | 86683-86705 4:01:01 CCGTGTACCCGAGAAAGCCGCC    |

|                                              |       |       |       |                                                     |                     |
|----------------------------------------------|-------|-------|-------|-----------------------------------------------------|---------------------|
| 86745                                        | 86780 | 85698 | 86957 | CDS product envelope glycoprotein M                 | 86745-86780 7:04:01 |
| CCGAGCTCCCGCCGCGCCACGCGCCGCGTCGGCC           |       |       |       |                                                     |                     |
| 87112                                        | 87131 | 87078 | 89549 | CDS product DNA replication origin-binding helicase | 87112-87131 5:02:01 |
| CCGGCGCCACCCGCGCC                            |       |       |       |                                                     |                     |
| 87154                                        | 87174 | 87078 | 89549 | CDS product DNA replication origin-binding helicase | 87154-87174 4:01:01 |
| CCCCGTCTCCCTGCCCTCCCC                        |       |       |       |                                                     |                     |
| 87252                                        | 87281 | 87078 | 89549 | CDS product DNA replication origin-binding helicase | 87252-87281 6:03:01 |
| GGCTGGGCGAGGCGCTGGGGGCGCCGCGG                |       |       |       |                                                     |                     |
| 87403                                        | 87437 | 87078 | 89549 | CDS product DNA replication origin-binding helicase | 87403-87437 7:04:01 |
| GGGCGCGCCTACCGCGGCTGCTGGTGCAGGTGG            |       |       |       |                                                     |                     |
| 87573                                        | 87617 | 87078 | 89549 | CDS product DNA replication origin-binding helicase | 87573-87617 7:04:01 |
| GGCTGCTGCGGCGGTGCCGCGGATTGTGGCGATGGACGCGACGG |       |       |       |                                                     |                     |
| 87754                                        | 87791 | 87078 | 89549 | CDS product DNA replication origin-binding helicase | 87754-87791 8:05:02 |
| GGCGGCGCGGCTCGGGGGGACGACGGCGGCGCCGGGG        |       |       |       |                                                     |                     |
| 88216                                        | 88237 | 87078 | 89549 | CDS product DNA replication origin-binding helicase | 88216-88237 6:03:01 |
| GGTGGCCGCGGACGGCGGCTGG                       |       |       |       |                                                     |                     |
| 88282                                        | 88307 | 87078 | 89549 | CDS product DNA replication origin-binding helicase | 88282-88307 5:02:01 |
| CCGCGCGCCTGCGCGCCCGCCTTCC                    |       |       |       |                                                     |                     |
| 88545                                        | 88558 | 87078 | 89549 | CDS product DNA replication origin-binding helicase | 88545-88558 4:01:01 |
| CCGGCCTCCCGCCC                               |       |       |       |                                                     |                     |
| 88569                                        | 88603 | 87078 | 89549 | CDS product DNA replication origin-binding helicase | 88569-88603 7:04:01 |
| CCGAGGGCCTGGCCGAGCACCCGCGGTGGCCGCC           |       |       |       |                                                     |                     |
| 88861                                        | 88884 | 87078 | 89549 | CDS product DNA replication origin-binding helicase | 88861-88884 5:02:01 |

|                                                           |       |       |       |                                                     |                                       |
|-----------------------------------------------------------|-------|-------|-------|-----------------------------------------------------|---------------------------------------|
| GGCCAACTGGCGGCTGTTCGGCGG                                  |       |       |       |                                                     |                                       |
| 89073                                                     | 89098 | 87078 | 89549 | CDS product DNA replication origin-binding helicase | 89073-89098 4:01:01                   |
| CCCGCGGGCCCGTAGTCGCCGTTGCC                                |       |       |       |                                                     |                                       |
| 89103                                                     | 89153 | 87078 | 89549 | CDS product DNA replication origin-binding helicase | 89103-89153 10:07:02                  |
| GGCTCTCCGGGCGGGGGCCGGCGCAGGGCGGGCGTGGGGCTGGGCGCGG         |       |       |       |                                                     |                                       |
| 89179                                                     | 89209 | 87078 | 89549 | CDS product DNA replication origin-binding helicase | 89179-89209 6:03:01                   |
| GGTGATATGGGAGGAGGTGTTCCGGGCCCCG                           |       |       |       |                                                     |                                       |
| 89305                                                     | 89327 | 87078 | 89549 | CDS product DNA replication origin-binding helicase | 89305-89327 5:02:01                   |
| CCGCGCCGGCCGCGCCACGCACC                                   |       |       |       |                                                     |                                       |
| 89407                                                     | 89467 | 87078 | 89549 | CDS product DNA replication origin-binding helicase | 89407-89467 11:08:02                  |
| CCGGCTCCTCGGCCTCGCCGCGCGCCCCGAGCCCCGGCCCGACGCGCCCCCGAGGCC |       |       |       |                                                     |                                       |
| 89749                                                     | 89764 | 89647 | 91920 | CDS product helicase-primase subunit                | 89749-89764 4:01:01 GGCGGGCGACGGCGG   |
| 89826                                                     | 89859 | 89647 | 91920 | CDS product helicase-primase subunit                | 89826-89859 6:03:01                   |
| GGCGCGGGGACGTGACGGCCGCGCGTTGGAGG                          |       |       |       |                                                     |                                       |
| 89872                                                     | 89886 | 89647 | 91920 | CDS product helicase-primase subunit                | 89872-89886 4:01:01 CCGCCGCGCTCCCC    |
| 90037                                                     | 90062 | 89647 | 91920 | CDS product helicase-primase subunit                | 90037-90062 6:03:01                   |
| CCGCCGAGGAGCCCCCGACCGCGC                                  |       |       |       |                                                     |                                       |
| 90095                                                     | 90144 | 89647 | 91920 | CDS product helicase-primase subunit                | 90095-90144 9:06:02                   |
| GGCGCTGCGGCTGGCCGTCGAGGAGGACGCGGTGCGCGGGCGGCCGCG          |       |       |       |                                                     |                                       |
| 90139                                                     | 90152 | 89647 | 91920 | CDS product helicase-primase subunit                | 90139-90152 4:01:01 CCGCGCCGCCCC      |
| 90208                                                     | 90233 | 89647 | 91920 | CDS product helicase-primase subunit                | 90208-90233 4:01:01                   |
| CCAACTTCGCGCGCCCGGGAACGCC                                 |       |       |       |                                                     |                                       |
| 90283                                                     | 90301 | 89647 | 91920 | CDS product helicase-primase subunit                | 90283-90301 4:01:01 CCGACATCGCCAGCCCC |

|       |       |       |       |                                                           |             |          |                          |
|-------|-------|-------|-------|-----------------------------------------------------------|-------------|----------|--------------------------|
| 90439 | 90458 | 89647 | 91920 | CDS product helicase-primase subunit                      | 90439-90458 | 4:01:01  | CCTTCTCCCCGGTGGCCGCC     |
| 90498 | 90530 | 89647 | 91920 | CDS product helicase-primase subunit                      | 90498-90530 | 6:03:01  |                          |
|       |       |       |       | GGCGGGCCGGCGCAGGTCCTCGGCTTCTGGGG                          |             |          |                          |
| 90782 | 90823 | 89647 | 91920 | CDS product helicase-primase subunit                      | 90782-90823 | 9:06:02  |                          |
|       |       |       |       | GGCGGGCGGGCAGCGGCGACGGCGGGACTGGCCCCGCGG                   |             |          |                          |
| 90895 | 90929 | 89647 | 91920 | CDS product helicase-primase subunit                      | 90895-90929 | 6:03:01  |                          |
|       |       |       |       | CCTTCTCCCCACCCTGTACGCCACCTCGTTCCC                         |             |          |                          |
| 91073 | 91095 | 89647 | 91920 | CDS product helicase-primase subunit                      | 91073-91095 | 4:01:01  | GGCGGCCCGCGTGGAGCGCGCGG  |
| 91133 | 91158 | 89647 | 91920 | CDS product helicase-primase subunit                      | 91133-91158 | 4:01:01  |                          |
|       |       |       |       | GGACGGCTTCTGGGGCGCCTTCGGGG                                |             |          |                          |
| 91471 | 91493 | 89647 | 91920 | CDS product helicase-primase subunit                      | 91471-91493 | 4:01:01  | CCGTTGCCCCGGCCAGAGCGCCCC |
| 91510 | 91523 | 89647 | 91920 | CDS product helicase-primase subunit                      | 91510-91523 | 4:01:01  | CCGCCCGCGCGGCC           |
| 91646 | 91667 | 89647 | 91920 | CDS product helicase-primase subunit                      | 91646-91667 | 4:01:01  | GGACGCGGACCACGGCCCCCGG   |
| 91655 | 91669 | 89647 | 91920 | CDS product helicase-primase subunit                      | 91655-91669 | 4:01:01  | CCACGGCCCCCGGCC          |
| 91701 | 91747 | 89647 | 91920 | CDS product helicase-primase subunit                      | 91701-91747 | 9:06:02  |                          |
|       |       |       |       | CCCTTCCCCTGCCCTGGACCCTCTACCGCGCCCCGTCCTGCTCCC             |             |          |                          |
| 91833 | 91861 | 89647 | 91920 | CDS product helicase-primase subunit                      | 91833-91861 | 6:03:01  |                          |
|       |       |       |       | GGCGGGGACGGCGAGGGCGAGGACGACGG                             |             |          |                          |
| 92135 | 92158 | 91977 | 92882 | CDS product tegument protein UL7                          | 92135-92158 | 6:03:01  | CCCGCCGCGCCGCGCCGCGCCGCC |
| 92336 | 92351 | 91977 | 92882 | CDS product tegument protein UL7                          | 92336-92351 | 4:01:01  | GGGCGGCGGGCGCAGG         |
| 92456 | 92514 | 91977 | 92882 | CDS product tegument protein UL7                          | 92456-92514 | 12:09:03 |                          |
|       |       |       |       | GGTCTCGGGCGGTACAAGGCCAGCCGTACGGCAGCACGGCGGGCGGCACGGTGGTGG |             |          |                          |
| 92563 | 92577 | 91977 | 92882 | CDS product tegument protein UL7                          | 92563-92577 | 4:01:01  | GGAAGCCGGCATGG           |

[illegible]

|                                             |       |       |       |                                               |                     |                           |
|---------------------------------------------|-------|-------|-------|-----------------------------------------------|---------------------|---------------------------|
| 94319                                       | 94343 | 92764 | 94932 | CDS product capsid portal protein             | 94319-94343 5:02:01 | CCAGGCGCCGAGCCAGCTCCCCGCC |
| 94344                                       | 94354 | 92764 | 94932 | CDS product capsid portal protein             | 94344-94354 4:01:01 | GGCGGCGGAGG               |
| 94355                                       | 94368 | 92764 | 94932 | CDS product capsid portal protein             | 94355-94368 4:01:01 | CCGCCCCCGGCGCC            |
| 94363                                       | 94381 | 92764 | 94932 | CDS product capsid portal protein             | 94363-94381 4:01:01 | GGCGCCTGGACGGTGCCGG       |
| 94378                                       | 94402 | 92764 | 94932 | CDS product capsid portal protein             | 94378-94402 5:02:01 | CCGGCACCGCGAGGCCGATGCCGCC |
| 94445                                       | 94468 | 92764 | 94932 | CDS product capsid portal protein             | 94445-94468 4:01:01 | GGGCGAAGCTGGCCGGGCTGCCGG  |
| 94457                                       | 94476 | 92764 | 94932 | CDS product capsid portal protein             | 94457-94476 4:01:01 | CCGGGCTGCCGGCGCCCCC       |
| 94559                                       | 94595 | 92764 | 94932 | CDS product capsid portal protein             | 94559-94595 7:04:01 |                           |
| CCGCGAGCCGCACCACCTCTGCCTCGCCGGCGGCGCC       |       |       |       |                                               |                     |                           |
| 94650                                       | 94668 | 92764 | 94932 | CDS product capsid portal protein             | 94650-94668 4:01:01 | CCAATCCCGCGCCACGTCC       |
| 94833                                       | 94866 | 92764 | 94932 | CDS product capsid portal protein             | 94833-94866 5:02:01 |                           |
| CCGCACCCACTCGCCCGGCGGCCCCGGAGCGCCC          |       |       |       |                                               |                     |                           |
| 94849                                       | 94869 | 92764 | 94932 | CDS product capsid portal protein             | 94849-94869 4:01:01 | GGCGGCCCCGGAGCGCCCGGG     |
| 95057                                       | 95100 | 94982 | 97498 | CDS product helicase-primase helicase subunit | 95057-95100 9:06:02 |                           |
| GGATCCGGCAGCTGGCGGCCGCGCGGCTGCCGGCGGCGGCCGG |       |       |       |                                               |                     |                           |
| 95118                                       | 95144 | 94982 | 97498 | CDS product helicase-primase helicase subunit | 95118-95144 4:01:01 |                           |
| CCGCGCGGCCGCGGCGGCCGAGTCCCC                 |       |       |       |                                               |                     |                           |
| 95306                                       | 95323 | 94982 | 97498 | CDS product helicase-primase helicase subunit | 95306-95323 5:02:01 |                           |
| CCGCCGCCTACCACAGCC                          |       |       |       |                                               |                     |                           |
| 95411                                       | 95428 | 94982 | 97498 | CDS product helicase-primase helicase subunit | 95411-95428 4:01:01 |                           |
| CCAGCCCGCCCAGCATCC                          |       |       |       |                                               |                     |                           |
| 95486                                       | 95503 | 94982 | 97498 | CDS product helicase-primase helicase subunit | 95486-95503 4:01:01 |                           |
| GGCGGCTGCTGGGCGCGG                          |       |       |       |                                               |                     |                           |

|       |       |       |       |                                                                                                 |                     |
|-------|-------|-------|-------|-------------------------------------------------------------------------------------------------|---------------------|
| 95538 | 95556 | 94982 | 97498 | CDS product helicase-primase helicase subunit<br>GGCGGAGCTCGCGCGGGG                             | 95538-95556 4:01:01 |
| 95646 | 95664 | 94982 | 97498 | CDS product helicase-primase helicase subunit<br>GGCCGGGCTGCTGGGCCGG                            | 95646-95664 4:01:01 |
| 95847 | 95871 | 94982 | 97498 | CDS product helicase-primase helicase subunit<br>CCTCACCTGCCTTATCACCAACCCC                      | 95847-95871 5:02:01 |
| 96114 | 96130 | 94982 | 97498 | CDS product helicase-primase helicase subunit<br>CCGCCTCCACGCGCACC                              | 96114-96130 4:01:01 |
| 96216 | 96236 | 94982 | 97498 | CDS product helicase-primase helicase subunit<br>CCGCACCGCCACGGGCCAGCC                          | 96216-96236 5:02:01 |
| 96228 | 96275 | 94982 | 97498 | CDS product helicase-primase helicase subunit<br>GGGCCAGCCGGGCTGGGGTGGAAAAATGGCTGCAGGCCAACTCGGG | 96228-96275 8:05:02 |
| 96300 | 96323 | 94982 | 97498 | CDS product helicase-primase helicase subunit<br>CCGCGACCAGGACGCCAGTCCACC                       | 96300-96323 5:02:01 |
| 96586 | 96604 | 94982 | 97498 | CDS product helicase-primase helicase subunit<br>CCCGCCTGGACCCGGGCC                             | 96586-96604 4:01:01 |
| 96589 | 96610 | 94982 | 97498 | CDS product helicase-primase helicase subunit<br>GGCCTGGACCCGGGCCGCGTGG                         | 96589-96610 4:01:01 |
| 96666 | 96700 | 94982 | 97498 | CDS product helicase-primase helicase subunit<br>GGACGACGCGGTCTGACTGGCGGGGCTGGCGGCGG            | 96666-96700 8:05:02 |
| 96712 | 96733 | 94982 | 97498 | CDS product helicase-primase helicase subunit<br>GGCTCTGAGGCCGGCGCCGGGG                         | 96712-96733 4:01:01 |
| 96807 | 96826 | 94982 | 97498 | CDS product helicase-primase helicase subunit                                                   | 96807-96826 4:01:01 |

|                                               |       |       |       |                                               |                                                     |
|-----------------------------------------------|-------|-------|-------|-----------------------------------------------|-----------------------------------------------------|
| CCAGCGCCCTACGTCCGCCC                          |       |       |       |                                               |                                                     |
| 96988                                         | 97006 | 94982 | 97498 | CDS product helicase-primase helicase subunit | 96988-97006 4:01:01                                 |
| GGCGGGCTGGTCTCCATGG                           |       |       |       |                                               |                                                     |
| 97068                                         | 97089 | 94982 | 97498 | CDS product helicase-primase helicase subunit | 97068-97089 5:02:01                                 |
| GGAGGAGCCCGGCCGGCGCCGG                        |       |       |       |                                               |                                                     |
| 97075                                         | 97095 | 94982 | 97498 | CDS product helicase-primase helicase subunit | 97075-97095 4:01:01                                 |
| CCCGGCCGGCGCCGGCTCCCC                         |       |       |       |                                               |                                                     |
| 97200                                         | 97219 | 94982 | 97498 | CDS product helicase-primase helicase subunit | 97200-97219 4:01:01                                 |
| GGAGGCGCTGGACGACAGGG                          |       |       |       |                                               |                                                     |
| 97268                                         | 97300 | 94982 | 97498 | CDS product helicase-primase helicase subunit | 97268-97300 6:03:01                                 |
| CCATGACCATCGCCCGCTCCCAGGGCCTGAGCC             |       |       |       |                                               |                                                     |
| 97379                                         | 97409 | 94982 | 97498 | CDS product helicase-primase helicase subunit | 97379-97409 6:03:01                                 |
| CCTCCCGCTTCTCCGGATGAACCTCAACCC                |       |       |       |                                               |                                                     |
| 97588                                         | 97608 | 97519 | 98085 | CDS product nuclear protein UL4               | 97588-97608 4:01:01 CCCCCCTGTGGGCCCTGCCCC           |
| 97652                                         | 97674 | 97519 | 98085 | CDS product nuclear protein UL4               | 97652-97674 5:02:01 GGTGTCGGTGTGCGGCGGGCTGG         |
| 97845                                         | 97860 | 97519 | 98085 | CDS product nuclear protein UL4               | 97845-97860 4:01:01 GGGTGGGTGGCGACGG                |
| 97895                                         | 97920 | 97519 | 98085 | CDS product nuclear protein UL4               | 97895-97920 4:01:01 CCTGCTGGCCGTGTGCCTGGGCGCCC      |
| 97955                                         | 97988 | 97519 | 98085 | CDS product nuclear protein UL4               | 97955-97988 7:04:01                                 |
| CCAGAGCCTGGCGCCGGCGGCCGCGCGCCCCC              |       |       |       |                                               |                                                     |
| 98041                                         | 98063 | 97519 | 98085 | CDS product nuclear protein UL4               | 98041-98063 6:03:01 CCCGCCCCCAAACCCCTCCCC           |
| 98157                                         | 98204 | 98112 | 98558 | CDS product protein V57                       | 98157-98204 11:08:02                                |
| GGGGGCGGCGGGGCGCGCGGCGCTCGGCGCTGGGAGGGAGAGGGG |       |       |       |                                               |                                                     |
| 98245                                         | 98276 | 98112 | 98558 | CDS product protein V57                       | 98245-98276 5:02:01 GGCGCGGCGCCCGGCCTCTTCGGGCGAGGGG |



|                                                                       |       |       |        |                                    |                                                         |
|-----------------------------------------------------------------------|-------|-------|--------|------------------------------------|---------------------------------------------------------|
| 98320                                                                 | 98375 | 98112 | 98558  | CDS product protein V57            | 98320-98375 10:07:02                                    |
| GGAGGCTCGGGGCCCTGCGGACGCGCCGGGGACGGGGTGGCCGCTGGGGCTCGGG               |       |       |        |                                    |                                                         |
| 98379                                                                 | 98405 | 98112 | 98558  | CDS product protein V57            | 98379-98405 7:04:01 CCGCCAGGGCCGCCCTCCCCGGCCGCC         |
| 98435                                                                 | 98462 | 98112 | 98558  | CDS product protein V57            | 98435-98462 6:03:01 GGCCGCGGCGGCGCGGTTGGACGCGAGG        |
| 98476                                                                 | 98510 | 98112 | 98558  | CDS product protein V57            | 98476-98510 8:05:02 CCGCCACCGTGGCCACCCGGGCCTCCCCGAAGACC |
| 98521                                                                 | 98539 | 98112 | 98558  | CDS product protein V57            | 98521-98539 4:01:01 CCTCGCCGAGACCTCGCC                  |
| 98815                                                                 | 98842 | 98564 | 99217  | CDS product nuclear protein UL3    | 98815-98842 6:03:01 CCCGCGCGCCGCGGCCCGCCCGCCGCC         |
| 98827                                                                 | 98857 | 98564 | 99217  | CDS product nuclear protein UL3    | 98827-98857 5:02:01 GGCCCGCCCGGCCGCGGCTTGCGCGCGGG       |
| 99014                                                                 | 99083 | 98564 | 99217  | CDS product nuclear protein UL3    | 99014-99083 13:10:03                                    |
| GGGTCCGGCTCTGGCGCGGGCCCGGGCTCTGCGGGCGCTGGGGCGCGGGCCTGGCCGGCTTGGGCCCGG |       |       |        |                                    |                                                         |
| 99103                                                                 | 99135 | 98564 | 99217  | CDS product nuclear protein UL3    | 99103-99135 6:03:01                                     |
| CCCGGGCCCGCACCCGCGCTTTCACCGTCACC                                      |       |       |        |                                    |                                                         |
| 99139                                                                 | 99158 | 98564 | 99217  | CDS product nuclear protein UL3    | 99139-99158 5:02:01 GGCGGCGGGCTCGGCCGCGG                |
| 99153                                                                 | 99184 | 98564 | 99217  | CDS product nuclear protein UL3    | 99153-99184 7:04:01 CCGCGGCAACACCCGCCAGCCGCGGGCCGCC     |
| 99395                                                                 | 99420 | 99264 | 100160 | CDS product uracil-DNA glycosylase | 99395-99420 5:02:01 CCGCTTCCCGGCCGCCCCAAAGGCC           |
| 99481                                                                 | 99512 | 99264 | 100160 | CDS product uracil-DNA glycosylase | 99481-99512 7:04:01                                     |
| CCAGCACCGCGTGCACCAGCCGCCCCAGCCC                                       |       |       |        |                                    |                                                         |
| 99586                                                                 | 99604 | 99264 | 100160 | CDS product uracil-DNA glycosylase | 99586-99604 4:01:01 CCCAGGCCTCCAGGCAGCC                 |
| 99661                                                                 | 99679 | 99264 | 100160 | CDS product uracil-DNA glycosylase | 99661-99679 5:02:01 GGAGGCTGGGCGGGATCGG                 |
| 99703                                                                 | 99721 | 99264 | 100160 | CDS product uracil-DNA glycosylase | 99703-99721 4:01:01 CCAGGCCGTGGGCCTGCC                  |
| 99724                                                                 | 99749 | 99264 | 100160 | CDS product uracil-DNA glycosylase | 99724-99749 5:02:01 GGCTGTGGTAGGGTCTTGCCAGG             |
| 99929                                                                 | 99962 | 99264 | 100160 | CDS product uracil-DNA glycosylase | 99929-99962 6:03:01                                     |
| GGCGGCGAAGGCGCTCCAGGTGACGGCGCGCTGG                                    |       |       |        |                                    |                                                         |

|                                                                                        |        |        |        |                                      |               |          |                          |
|----------------------------------------------------------------------------------------|--------|--------|--------|--------------------------------------|---------------|----------|--------------------------|
| 99998                                                                                  | 100086 | 99264  | 100160 | CDS product uracil-DNA glycosylase   | 99998-100086  | 16:13:04 |                          |
| GGGGCGCCGGCGCTTGGGCGGCGGGCGCCCGGGGGGCGACGGGGGGCTCCGGCGGGCCGAGGGCTTGGGGGACGAAGGCGCCGGGG |        |        |        |                                      |               |          |                          |
| 100081                                                                                 | 100103 | 99264  | 100160 | CDS product uracil-DNA glycosylase   | 100081-100103 | 4:01:01  | CCGGGGCCGAAGACTCCGGAGCC  |
| 100098                                                                                 | 100137 | 99264  | 100160 | CDS product uracil-DNA glycosylase   | 100098-100137 | 8:05:02  |                          |
| GGAGCCGAGGGCTCGGGGGCCAAGGCCAAGGGCTTGGGGG                                               |        |        |        |                                      |               |          |                          |
| 100164                                                                                 | 100203 | 100144 | 100632 | CDS product envelope glycoprotein L  | 100164-100203 | 7:04:01  |                          |
| GGAGCTGCAGGGACCGCCGTGTGGTACCGGGGCGGCAGG                                                |        |        |        |                                      |               |          |                          |
| 100213                                                                                 | 100239 | 100144 | 100632 | CDS product envelope glycoprotein L  | 100213-100239 | 7:04:01  |                          |
| GGTGGCGGCGGGAGCGGCGCGCGG                                                               |        |        |        |                                      |               |          |                          |
| 100274                                                                                 | 100307 | 100144 | 100632 | CDS product envelope glycoprotein L  | 100274-100307 | 5:02:01  |                          |
| CCTGGACGGCCAAGTCCCGATACCGGGGTGCC                                                       |        |        |        |                                      |               |          |                          |
| 100385                                                                                 | 100404 | 100144 | 100632 | CDS product envelope glycoprotein L  | 100385-100404 | 4:01:01  | CCGCGTACCACAGCGCGCC      |
| 100438                                                                                 | 100461 | 100144 | 100632 | CDS product envelope glycoprotein L  | 100438-100461 | 5:02:01  | CCTGCCAGCTCCAGGACCGCGTCC |
| 100490                                                                                 | 100519 | 100144 | 100632 | CDS product envelope glycoprotein L  | 100490-100519 | 6:03:01  |                          |
| GGTCGCCGCGGCACGGCTCGGCCAGGATGG                                                         |        |        |        |                                      |               |          |                          |
| 100523                                                                                 | 100564 | 100144 | 100632 | CDS product envelope glycoprotein L  | 100523-100564 | 6:03:01  |                          |
| CCGCGCTGTCCACGCGCCGCGCCGCAAGCCCGGGAGCC                                                 |        |        |        |                                      |               |          |                          |
| 100574                                                                                 | 100600 | 100144 | 100632 | CDS product envelope glycoprotein L  | 100574-100600 | 5:02:01  |                          |
| CCGCCAGCAGCGCCGCCAGCAGCGCCC                                                            |        |        |        |                                      |               |          |                          |
| 101708                                                                                 | 101752 | 101677 | 103839 | CDS product ubiquitin E3 ligase ICP0 | 101708-101752 | 9:06:02  |                          |
| GGTGGTGTGGCGGGTGGGCTGCGGGTCGCGGGTAGGGGCGGGG                                            |        |        |        |                                      |               |          |                          |
| 101776                                                                                 | 101796 | 101677 | 103839 | CDS product ubiquitin E3 ligase ICP0 | 101776-101796 | 6:03:01  |                          |
| CCGCCGCCAGGAGCCGCCGCC                                                                  |        |        |        |                                      |               |          |                          |

|        |        |        |        |                                              |               |         |                    |
|--------|--------|--------|--------|----------------------------------------------|---------------|---------|--------------------|
| 101805 | 101836 | 101677 | 103839 | CDS product ubiquitin E3 ligase ICP0         | 101805-101836 | 6:03:01 |                    |
|        |        |        |        | GGCCGAGCGGCTGGCCGGGCTCGGGCCTGGG              |               |         |                    |
| 101874 | 101892 | 101677 | 103839 | CDS product ubiquitin E3 ligase ICP0         | 101874-101892 | 5:02:01 | GGCGGGGTCTTTAGGAGG |
| 101903 | 101919 | 101677 | 103839 | CDS product ubiquitin E3 ligase ICP0         | 101903-101919 | 4:01:01 | CCCAGGCGGCCACCTCC  |
| 101959 | 102001 | 101677 | 103839 | CDS product ubiquitin E3 ligase ICP0         | 101959-102001 | 8:05:02 |                    |
|        |        |        |        | CCGGGGTCCAGGCCGTCCCGCGCCATGGCGCCCGGGGCTCC    |               |         |                    |
| 103264 | 103300 | 101677 | 103839 | CDS product ubiquitin E3 ligase ICP0         | 103264-103300 | 7:04:01 |                    |
|        |        |        |        | CCCACCAGAGCGCCCTCGACCCACTCCAGCACCCGCC        |               |         |                    |
| 103313 | 103329 | 101677 | 103839 | CDS product ubiquitin E3 ligase ICP0         | 103313-103329 | 4:01:01 | CCCCGGCCCGTGCCCC   |
| 103330 | 103359 | 101677 | 103839 | CDS product ubiquitin E3 ligase ICP0         | 103330-103359 | 5:02:01 |                    |
|        |        |        |        | GGCGCGTTCGGCAGCAGGGCAGCGCGGG                 |               |         |                    |
| 103415 | 103459 | 101677 | 103839 | CDS product ubiquitin E3 ligase ICP0         | 103415-103459 | 6:03:01 |                    |
|        |        |        |        | GGCGCCCGCCCCGTCGGCCGCCCGGCCCTTGGGGCCCTCGG    |               |         |                    |
| 103419 | 103466 | 101677 | 103839 | CDS product ubiquitin E3 ligase ICP0         | 103419-103466 | 8:05:02 |                    |
|        |        |        |        | CCCGGCCCGTCGGCCGCCCGGCCCTTGGGGCCCTCGGCCTCCCC |               |         |                    |
| 103479 | 103500 | 101677 | 103839 | CDS product ubiquitin E3 ligase ICP0         | 103479-103500 | 5:02:01 |                    |
|        |        |        |        | CCCGGCGTCCCCGCCGGCCGCC                       |               |         |                    |
| 103559 | 103594 | 101677 | 103839 | CDS product ubiquitin E3 ligase ICP0         | 103559-103594 | 7:04:01 |                    |
|        |        |        |        | CCGCGTCCGACGCGCGTCTGCCTCCGGCCCTCCCC          |               |         |                    |
| 103697 | 103733 | 101677 | 103839 | CDS product ubiquitin E3 ligase ICP0         | 103697-103733 | 7:04:01 |                    |
|        |        |        |        | GGCGGATGCAGGCCAGGCAGAAGGCGTGCAGGCAGGG        |               |         |                    |
| 103792 | 103817 | 101677 | 103839 | CDS product ubiquitin E3 ligase ICP0         | 103792-103817 | 7:04:01 |                    |
|        |        |        |        | GGGGCGGCGGCGGCGGCGGCAGAAGG                   |               |         |                    |

|                                                                               |        |        |        |                                            |               |          |                 |
|-------------------------------------------------------------------------------|--------|--------|--------|--------------------------------------------|---------------|----------|-----------------|
| 105167                                                                        | 105207 | 105114 | 109340 | CDS product transcriptional regulator ICP4 | 105167-105207 | 8:05:02  |                 |
| GGACGCGGACGACGAGGAGGACGCGGAGGACGCGGACGAGG                                     |        |        |        |                                            |               |          |                 |
| 105217                                                                        | 105255 | 105114 | 109340 | CDS product transcriptional regulator ICP4 | 105217-105255 | 7:04:01  |                 |
| CCACGCGCGCCGGCCCGCGCCGCGGGCCGGGGCCGGGGCC                                      |        |        |        |                                            |               |          |                 |
| 105240                                                                        | 105268 | 105114 | 109340 | CDS product transcriptional regulator ICP4 | 105240-105268 | 6:03:01  |                 |
| GGCCGGGGCCGGGGCCGGGGCGCGGCGCGG                                                |        |        |        |                                            |               |          |                 |
| 105270                                                                        | 105320 | 105114 | 109340 | CDS product transcriptional regulator ICP4 | 105270-105320 | 10:07:02 |                 |
| CCCCCGCCGATGCCCGCTGCCGCGCCCGGGAAGCCCGAGTCCGTGCC                               |        |        |        |                                            |               |          |                 |
| 105336                                                                        | 105354 | 105114 | 109340 | CDS product transcriptional regulator ICP4 | 105336-105354 | 4:01:01  |                 |
| GGCGCCAGGCCGGCGGGG                                                            |        |        |        |                                            |               |          |                 |
| 105382                                                                        | 105464 | 105114 | 109340 | CDS product transcriptional regulator ICP4 | 105382-105464 | 14:11:03 |                 |
| CCGGGACGCCCGCGCGCGCTGCACCAGCGTCTCCCGCGGGCCCTGGTCCGCGTCCCAGGCCACGCCGGCGCGCGGCC |        |        |        |                                            |               |          |                 |
| 105443                                                                        | 105483 | 105114 | 109340 | CDS product transcriptional regulator ICP4 | 105443-105483 | 9:06:02  |                 |
| GGCCACGCCGGGCGCCGCGGCCGCGGCGGCGGGGGCGG                                        |        |        |        |                                            |               |          |                 |
| 105486                                                                        | 105500 | 105114 | 109340 | CDS product transcriptional regulator ICP4 | 105486-105500 | 4:01:01  | CCCGCCTCCAGCACC |
| 105504                                                                        | 105523 | 105114 | 109340 | CDS product transcriptional regulator ICP4 | 105504-105523 | 4:01:01  |                 |
| GGCGGCGCCTCGGCGTGCGG                                                          |        |        |        |                                            |               |          |                 |
| 105550                                                                        | 105563 | 105114 | 109340 | CDS product transcriptional regulator ICP4 | 105550-105563 | 4:01:01  | CCACCGCCGCGGCC  |
| 105596                                                                        | 105621 | 105114 | 109340 | CDS product transcriptional regulator ICP4 | 105596-105621 | 5:02:01  |                 |
| CCGCCCCGAGGCCAGGTACACCGGCC                                                    |        |        |        |                                            |               |          |                 |
| 105605                                                                        | 105628 | 105114 | 109340 | CDS product transcriptional regulator ICP4 | 105605-105628 | 4:01:01  |                 |
| GGCCAGGTACACCGGCCGAGCGG                                                       |        |        |        |                                            |               |          |                 |
| 105646                                                                        | 105666 | 105114 | 109340 | CDS product transcriptional regulator ICP4 | 105646-105666 | 6:03:01  |                 |

|                                                                        |               |         |                 |  |  |  |  |
|------------------------------------------------------------------------|---------------|---------|-----------------|--|--|--|--|
| GGTTGGCGGCGGGTGGCTGG                                                   |               |         |                 |  |  |  |  |
| 105667 105710 105114 109340 CDS product transcriptional regulator ICP4 | 105667-105710 | 8:05:02 |                 |  |  |  |  |
| CCGCCTCGCCCTCCGCGAAGTCCGGCTCCCCGAGCCCCAGCGCC                           |               |         |                 |  |  |  |  |
| 105724 105747 105114 109340 CDS product transcriptional regulator ICP4 | 105724-105747 | 4:01:01 |                 |  |  |  |  |
| CCATGTCCTTGCGCCCGTCGAGCC                                               |               |         |                 |  |  |  |  |
| 105777 105816 105114 109340 CDS product transcriptional regulator ICP4 | 105777-105816 | 7:04:01 |                 |  |  |  |  |
| GGCGGCACGGGCACCGCGGTGCGGGGCCAGGCGCGTGG                                 |               |         |                 |  |  |  |  |
| 106027 106045 105114 109340 CDS product transcriptional regulator ICP4 | 106027-106045 | 4:01:01 |                 |  |  |  |  |
| CCTGCCCCGACGGCCGGGCC                                                   |               |         |                 |  |  |  |  |
| 106091 106113 105114 109340 CDS product transcriptional regulator ICP4 | 106091-106113 | 6:03:01 |                 |  |  |  |  |
| CCGCCGCCGCGCCGCGGCCAGCC                                                |               |         |                 |  |  |  |  |
| 106201 106227 105114 109340 CDS product transcriptional regulator ICP4 | 106201-106227 | 5:02:01 |                 |  |  |  |  |
| CCGGCGCGCCCGTCCAGGACCCGGCCC                                            |               |         |                 |  |  |  |  |
| 106289 106320 105114 109340 CDS product transcriptional regulator ICP4 | 106289-106320 | 6:03:01 |                 |  |  |  |  |
| CCCGCCGCGCACCGGCGGCCACTCAGGCCGCC                                       |               |         |                 |  |  |  |  |
| 106302 106322 105114 109340 CDS product transcriptional regulator ICP4 | 106302-106322 | 4:01:01 |                 |  |  |  |  |
| GGCGGCCACTCAGGCCGCCGG                                                  |               |         |                 |  |  |  |  |
| 106345 106360 105114 109340 CDS product transcriptional regulator ICP4 | 106345-106360 | 4:01:01 | CGCCAGCGCCTCCCC |  |  |  |  |
| 106421 106437 105114 109340 CDS product transcriptional regulator ICP4 | 106421-106437 | 4:01:01 |                 |  |  |  |  |
| CCAGGCCACGCGCCGCC                                                      |               |         |                 |  |  |  |  |
| 106530 106559 105114 109340 CDS product transcriptional regulator ICP4 | 106530-106559 | 5:02:01 |                 |  |  |  |  |
| GGGCGCCAGGGCTCGGGGAAGAGCGGGTGG                                         |               |         |                 |  |  |  |  |
| 106561 106580 105114 109340 CDS product transcriptional regulator ICP4 | 106561-106580 | 4:01:01 |                 |  |  |  |  |

|                                                                                                       |        |        |        |                                            |               |          |                  |
|-------------------------------------------------------------------------------------------------------|--------|--------|--------|--------------------------------------------|---------------|----------|------------------|
| CCGCGAGCCGCGCCGCGACC                                                                                  |        |        |        |                                            |               |          |                  |
| 106610                                                                                                | 106631 | 105114 | 109340 | CDS product transcriptional regulator ICP4 | 106610-106631 | 4:01:01  |                  |
| GGCGCTGGGCGCGGGCGTGTGG                                                                                |        |        |        |                                            |               |          |                  |
| 106640                                                                                                | 106655 | 105114 | 109340 | CDS product transcriptional regulator ICP4 | 106640-106655 | 4:01:01  | GGGCGGCACGCGGCGG |
| 106667                                                                                                | 106694 | 105114 | 109340 | CDS product transcriptional regulator ICP4 | 106667-106694 | 6:03:01  |                  |
| GGCGGCGGGGCCCGGGCGGCATGGGG                                                                            |        |        |        |                                            |               |          |                  |
| 106705                                                                                                | 106720 | 105114 | 109340 | CDS product transcriptional regulator ICP4 | 106705-106720 | 4:01:01  | GGGCGGGCAGCGGCGG |
| 106734                                                                                                | 106785 | 105114 | 109340 | CDS product transcriptional regulator ICP4 | 106734-106785 | 9:06:02  |                  |
| GGGGACCCGGCGGCGCGCCGGCTTTTGCCGCGCCGGGCCCTGGCCCCGG                                                     |        |        |        |                                            |               |          |                  |
| 106762                                                                                                | 106787 | 105114 | 109340 | CDS product transcriptional regulator ICP4 | 106762-106787 | 5:02:01  |                  |
| CCGGCGCCGGGCCCTGGCCCCGCC                                                                              |        |        |        |                                            |               |          |                  |
| 106806                                                                                                | 106832 | 105114 | 109340 | CDS product transcriptional regulator ICP4 | 106806-106832 | 5:02:01  |                  |
| GGCGGGCCGTCGCGCGGGCCTCGAGG                                                                            |        |        |        |                                            |               |          |                  |
| 106825                                                                                                | 106841 | 105114 | 109340 | CDS product transcriptional regulator ICP4 | 106825-106841 | 4:01:01  |                  |
| CCTCGAGGCCCGCCCCC                                                                                     |        |        |        |                                            |               |          |                  |
| 106856                                                                                                | 106878 | 105114 | 109340 | CDS product transcriptional regulator ICP4 | 106856-106878 | 6:03:01  |                  |
| GGCGGCCGGGAGGGCCGGGCGG                                                                                |        |        |        |                                            |               |          |                  |
| 106894                                                                                                | 106911 | 105114 | 109340 | CDS product transcriptional regulator ICP4 | 106894-106911 | 5:02:01  |                  |
| GGGCGGCAGGGCCGGCGG                                                                                    |        |        |        |                                            |               |          |                  |
| 106905                                                                                                | 107018 | 105114 | 109340 | CDS product transcriptional regulator ICP4 | 106905-107018 | 24:21:06 |                  |
| CCGGCGGCCCTCGTCCCTTTCTTCCTCCTCCTCCTCGGCCCCGTCGGGGCCCCCAGCTCCTCCGGCCCCAGCACCTCCACCGCCGCGCCGGGCTCCGGCCC |        |        |        |                                            |               |          |                  |
| 107003                                                                                                | 107082 | 105114 | 109340 | CDS product transcriptional regulator ICP4 | 107003-107082 | 14:11:03 |                  |
| GGCCGGGCTCCGGCCCGACTAGGGCCCGGGCTGAGGCTGGGGCTCGGGCCTGGCGGCCCGCGCGGGGCTCCCGCGGG                         |        |        |        |                                            |               |          |                  |

[illegible]

|                                                                        |               |          |                  |  |  |  |
|------------------------------------------------------------------------|---------------|----------|------------------|--|--|--|
| GGGCCCCGGGCGCTGGCGGCAGCGGCGCCGG                                        |               |          |                  |  |  |  |
| 107970 108002 105114 109340 CDS product transcriptional regulator ICP4 | 107970-108002 | 7:04:01  |                  |  |  |  |
| CCCGCGCCCGCGCGCCGGCCTCCGGGTAGGCC                                       |               |          |                  |  |  |  |
| 107981 108007 105114 109340 CDS product transcriptional regulator ICP4 | 107981-108007 | 5:02:01  |                  |  |  |  |
| GGCGCCGGCCTCCGGGTAGGCCATGGG                                            |               |          |                  |  |  |  |
| 108064 108084 105114 109340 CDS product transcriptional regulator ICP4 | 108064-108084 | 4:01:01  |                  |  |  |  |
| GGCGGCTCATGGCCACGCAGG                                                  |               |          |                  |  |  |  |
| 108292 108308 105114 109340 CDS product transcriptional regulator ICP4 | 108292-108308 | 4:01:01  |                  |  |  |  |
| CCAGGTCCACCAGCGCC                                                      |               |          |                  |  |  |  |
| 108320 108338 105114 109340 CDS product transcriptional regulator ICP4 | 108320-108338 | 4:01:01  |                  |  |  |  |
| CCCCGCGTCCCCATCTCC                                                     |               |          |                  |  |  |  |
| 108352 108371 105114 109340 CDS product transcriptional regulator ICP4 | 108352-108371 | 4:01:01  |                  |  |  |  |
| CCGCGGGCCCCGCGCCGCC                                                    |               |          |                  |  |  |  |
| 108454 108469 105114 109340 CDS product transcriptional regulator ICP4 | 108454-108469 | 5:02:01  | GGCCGGGCGGCGGCGG |  |  |  |
| 108477 108493 105114 109340 CDS product transcriptional regulator ICP4 | 108477-108493 | 4:01:01  |                  |  |  |  |
| CCGGGCCAGGCCTCGCC                                                      |               |          |                  |  |  |  |
| 108479 108499 105114 109340 CDS product transcriptional regulator ICP4 | 108479-108499 | 4:01:01  |                  |  |  |  |
| GGGCCAGGCCTCGCCGAGGG                                                   |               |          |                  |  |  |  |
| 108585 108647 105114 109340 CDS product transcriptional regulator ICP4 | 108585-108647 | 11:08:02 |                  |  |  |  |
| GGGCGCCGCGGCGAGGCGCCGGGCCCTGGCCTTGGCTGGATCCGCGGGCGGTCCGGCGGGG          |               |          |                  |  |  |  |
| 108650 108671 105114 109340 CDS product transcriptional regulator ICP4 | 108650-108671 | 4:01:01  |                  |  |  |  |
| CCCCCGGCGCCAGGGCTCCCC                                                  |               |          |                  |  |  |  |
| 108683 108715 105114 109340 CDS product transcriptional regulator ICP4 | 108683-108715 | 6:03:01  |                  |  |  |  |



|                                                                        |               |          |                 |  |  |  |
|------------------------------------------------------------------------|---------------|----------|-----------------|--|--|--|
| CCCCGAGTCCCCGGCCCCGAGTCCCTAAATCC                                       |               |          |                 |  |  |  |
| 108722 108738 105114 109340 CDS product transcriptional regulator ICP4 | 108722-108738 | 5:02:01  |                 |  |  |  |
| GGCCGCGGCGGCGGCGG                                                      |               |          |                 |  |  |  |
| 108739 108759 105114 109340 CDS product transcriptional regulator ICP4 | 108739-108759 | 4:01:01  |                 |  |  |  |
| CCCCCGTGTCATCCCCAATCC                                                  |               |          |                 |  |  |  |
| 108770 108792 105114 109340 CDS product transcriptional regulator ICP4 | 108770-108792 | 5:02:01  |                 |  |  |  |
| GGCATCGGCCCCGAGTCGGCGG                                                 |               |          |                 |  |  |  |
| 108806 108837 105114 109340 CDS product transcriptional regulator ICP4 | 108806-108837 | 6:03:01  |                 |  |  |  |
| GGTCCCCGGCTCGGGCTTGGGCTGGCTTCGG                                        |               |          |                 |  |  |  |
| 108887 108901 105114 109340 CDS product transcriptional regulator ICP4 | 108887-108901 | 4:01:01  | GGGCGCAGGCGGCGG |  |  |  |
| 108922 108939 105114 109340 CDS product transcriptional regulator ICP4 | 108922-108939 | 4:01:01  |                 |  |  |  |
| GGGCGGCGGCCACGACGG                                                     |               |          |                 |  |  |  |
| 108931 108959 105114 109340 CDS product transcriptional regulator ICP4 | 108931-108959 | 6:03:01  |                 |  |  |  |
| CCACGACGGCCGCTCAGCCGCGGCCGCC                                           |               |          |                 |  |  |  |
| 108953 108975 105114 109340 CDS product transcriptional regulator ICP4 | 108953-108975 | 5:02:01  |                 |  |  |  |
| GGCCGCCTCGGCTTCGGCGGCGG                                                |               |          |                 |  |  |  |
| 108979 109046 105114 109340 CDS product transcriptional regulator ICP4 | 108979-109046 | 12:09:03 |                 |  |  |  |
| CCTCCGCCGCGGCCGCGAGCGCCCGCGCGGCCAGGCGCCCCGCGCGGCGTCTCTGGGGCC           |               |          |                 |  |  |  |
| 109010 109032 105114 109340 CDS product transcriptional regulator ICP4 | 109010-109032 | 4:01:01  |                 |  |  |  |
| GGCCCAGGCGCCCCCGCCGCGG                                                 |               |          |                 |  |  |  |
| 109041 109088 105114 109340 CDS product transcriptional regulator ICP4 | 109041-109088 | 7:04:01  |                 |  |  |  |
| GGGGCCTCGGAGGGCGCGAGGCCCGGGCCCCCGGGTTCTCCGGG                           |               |          |                 |  |  |  |
| 109057 109109 105114 109340 CDS product transcriptional regulator ICP4 | 109057-109109 | 12:09:03 |                 |  |  |  |

|                                                                        |               |          |                      |
|------------------------------------------------------------------------|---------------|----------|----------------------|
| CCGAGGCCCCGGGCCCCCGGGTTCTCCGGGTCTCTCTTCCTCCTCCCC                       |               |          |                      |
| 109144 109175 105114 109340 CDS product transcriptional regulator ICP4 | 109144-109175 | 7:04:01  |                      |
| CCCCCGCGCCACCATGCGCCACAGCTCCGCC                                        |               |          |                      |
| 109181 109199 105114 109340 CDS product transcriptional regulator ICP4 | 109181-109199 | 4:01:01  |                      |
| GGCGCGGGCGGCCCGCCGG                                                    |               |          |                      |
| 109240 109277 105114 109340 CDS product transcriptional regulator ICP4 | 109240-109277 | 9:06:02  |                      |
| CCGGGTCTCTCTCCGGGCCCCCTCCGGGCCGAGGTCC                                  |               |          |                      |
| 114243 114306 114207 115151 CDS product regulatory protein ICP22       | 114243-114306 | 11:08:02 |                      |
| CCTGCCGCCTCTGCCGCTCGCCGACCGGTGCTCCCAGGGCCCGCCTGCCAGGCGGGCCC            |               |          |                      |
| 114316 114342 114207 115151 CDS product regulatory protein ICP22       | 114316-114342 | 5:02:01  |                      |
| CCGCCGCGGGCCTGGCGCCTTCTGCCC                                            |               |          |                      |
| 114536 114560 114207 115151 CDS product regulatory protein ICP22       | 114536-114560 | 4:01:01  |                      |
| CCCGAGCAGGCCGCCCCGCTGCACC                                              |               |          |                      |
| 114611 114633 114207 115151 CDS product regulatory protein ICP22       | 114611-114633 | 5:02:01  |                      |
| CCCCCGCGCGCCTGCCGGGCCC                                                 |               |          |                      |
| 114744 114758 114207 115151 CDS product regulatory protein ICP22       | 114744-114758 | 4:01:01  | CCGCCGTCCCCTCCC      |
| 114777 114844 114207 115151 CDS product regulatory protein ICP22       | 114777-114844 | 15:12:03 |                      |
| CCGCCTCCGGGCCCCCTCTTCCTCCGCGCCTCTCCCGGTCTCGGCCTCGTCGTCCTCGTCGTCC       |               |          |                      |
| 114956 114975 114207 115151 CDS product regulatory protein ICP22       | 114956-114975 | 5:02:01  | GGCGCCAACGGCGGCGGCGG |
| 114981 115004 114207 115151 CDS product regulatory protein ICP22       | 114981-115004 | 6:03:01  |                      |
| CCGCCGCCGCGCGACAACCCCC                                                 |               |          |                      |
| 115036 115054 114207 115151 CDS product regulatory protein ICP22       | 115036-115054 | 5:02:01  | CCGCCGCCGCCCCGCGCCC  |
| 115068 115108 114207 115151 CDS product regulatory protein ICP22       | 115068-115108 | 8:05:02  |                      |

|                                                             |        |        |        |                                                 |               |          |                        |
|-------------------------------------------------------------|--------|--------|--------|-------------------------------------------------|---------------|----------|------------------------|
| CCTCCGGCTCCTCGACGGCCTCGTCGCCGGGCCCCGTCCCCC                  |        |        |        |                                                 |               |          |                        |
| 115124                                                      | 115139 | 114207 | 115151 | CDS product regulatory protein ICP22            | 115124-115139 | 4:01:01  | CCGCCCAGGCGCCGCC       |
| 115968                                                      | 115990 | 115937 | 116680 | CDS product virion protein V67                  | 115968-115990 | 5:02:01  | CCCGCCGCGGGCCCGCCCGGCC |
| 115976                                                      | 116004 | 115937 | 116680 | CDS product virion protein V67                  | 115976-116004 | 7:04:01  |                        |
| GGGCCCCGCCCCGGCCGGCGGCTGCGGCGG                              |        |        |        |                                                 |               |          |                        |
| 116130                                                      | 116145 | 115937 | 116680 | CDS product virion protein V67                  | 116130-116145 | 4:01:01  | GGCGGTGCGGCAGCGG       |
| 116372                                                      | 116388 | 115937 | 116680 | CDS product virion protein V67                  | 116372-116388 | 4:01:01  | GGCCGGCGCGGCGCGGG      |
| 116495                                                      | 116515 | 115937 | 116680 | CDS product virion protein V67                  | 116495-116515 | 4:01:01  | GGGGGAGCATGGCGTACAGG   |
| 116541                                                      | 116599 | 115937 | 116680 | CDS product virion protein V67                  | 116541-116599 | 10:07:02 |                        |
| CCCTGAAAAGCCGCCAGCCGACGGGCCCGCCGTCGCGGCCGGGGCCAGCGTCCGCGGCC |        |        |        |                                                 |               |          |                        |
| 116814                                                      | 116846 | 116738 | 117418 | CDS product virion protein US2                  | 116814-116846 | 6:03:01  |                        |
| CCGCGCCGCGGTCCACGACCTCGTAAACCAGCC                           |        |        |        |                                                 |               |          |                        |
| 116911                                                      | 116929 | 116738 | 117418 | CDS product virion protein US2                  | 116911-116929 | 4:01:01  | GGCGATGGCCGGCCCGCGG    |
| 116938                                                      | 116953 | 116738 | 117418 | CDS product virion protein US2                  | 116938-116953 | 4:01:01  | CCGCCACGCTGCCCCC       |
| 117115                                                      | 117136 | 116738 | 117418 | CDS product virion protein US2                  | 117115-117136 | 5:02:01  | CCACTCTGCCGCTGCCGCCACC |
| 117137                                                      | 117186 | 116738 | 117418 | CDS product virion protein US2                  | 117137-117186 | 9:06:02  |                        |
| GGCGGTGCGGGCGGCGAACCAGGGCCGGCAGTCCCGGATGCGGGCCAGGGG         |        |        |        |                                                 |               |          |                        |
| 117204                                                      | 117223 | 116738 | 117418 | CDS product virion protein US2                  | 117204-117223 | 5:02:01  | CCACCCGCGCCGCGGCGCC    |
| 117233                                                      | 117247 | 116738 | 117418 | CDS product virion protein US2                  | 117233-117247 | 4:01:01  | CCCGCCGCCACGTCC        |
| 117273                                                      | 117292 | 116738 | 117418 | CDS product virion protein US2                  | 117273-117292 | 4:01:01  | CCGGCGTCCCTAGCCGCCCC   |
| 117672                                                      | 117698 | 117541 | 118875 | CDS product serine/threonine protein kinase US3 | 117672-117698 | 5:02:01  |                        |
| CCCGCGCGCTTGCCGCGGAAGCCCCC                                  |        |        |        |                                                 |               |          |                        |
| 117773                                                      | 117816 | 117541 | 118875 | CDS product serine/threonine protein kinase US3 | 117773-117816 | 8:05:02  |                        |

|                                                                             |               |         |
|-----------------------------------------------------------------------------|---------------|---------|
| GGACGGGTGCGGGTCAGGGCCGCGGCCGGGACGATAGGGCGG                                  |               |         |
| 117823 117852 117541 118875 CDS product serine/threonine protein kinase US3 | 117823-117852 | 8:05:02 |
| CCGAGCCGAGGCCGCCCCACCCCGCCC                                                 |               |         |
| 117894 117927 117541 118875 CDS product serine/threonine protein kinase US3 | 117894-117927 | 5:02:01 |
| GGCGACTGGGGCGACGACGGGCCCGCGCGGG                                             |               |         |
| 118156 118179 117541 118875 CDS product serine/threonine protein kinase US3 | 118156-118179 | 4:01:01 |
| GGGAGCTGGTGTGCGTGGTGTCTGG                                                   |               |         |
| 118244 118263 117541 118875 CDS product serine/threonine protein kinase US3 | 118244-118263 | 4:01:01 |
| GGCGCTGGCGGTGACGCGGG                                                        |               |         |
| 118277 118308 117541 118875 CDS product serine/threonine protein kinase US3 | 118277-118308 | 5:02:01 |
| CCTCGGTACCTGCACTCCCGCCGATCGCCC                                              |               |         |
| 118364 118388 117541 118875 CDS product serine/threonine protein kinase US3 | 118364-118388 | 4:01:01 |
| GGGCGACTTCGGCGCGGCACACGGG                                                   |               |         |
| 118413 118431 117541 118875 CDS product serine/threonine protein kinase US3 | 118413-118431 | 4:01:01 |
| GGCCTGGCTGGCACCTGG                                                          |               |         |
| 118580 118600 117541 118875 CDS product serine/threonine protein kinase US3 | 118580-118600 | 4:01:01 |
| GGCAGCGGCCTGGGCGAAGG                                                        |               |         |
| 118631 118652 117541 118875 CDS product serine/threonine protein kinase US3 | 118631-118652 | 4:01:01 |
| CCGCCGGCTGGCCGTGCGCGCC                                                      |               |         |
| 118661 118704 117541 118875 CDS product serine/threonine protein kinase US3 | 118661-118704 | 8:05:02 |
| CCCGCCTAGCCCCACCGACCGGTGACCCGAACTTCCAACGCC                                  |               |         |
| 118718 118746 117541 118875 CDS product serine/threonine protein kinase US3 | 118718-118746 | 5:02:01 |
| CCGAGAGCCGCGCAGCCCGTACCCCTGCC                                               |               |         |

|                                                                  |        |        |        |                                                 |               |          |                       |
|------------------------------------------------------------------|--------|--------|--------|-------------------------------------------------|---------------|----------|-----------------------|
| 118778                                                           | 118791 | 117541 | 118875 | CDS product serine/threonine protein kinase US3 | 118778-118791 | 4:01:01  |                       |
| CCACCTCCTGCACC                                                   |        |        |        |                                                 |               |          |                       |
| 118985                                                           | 119014 | 118983 | 120305 | CDS product envelope glycoprotein G             | 118985-119014 | 6:03:01  |                       |
| CCCGCCGCCGCTCAAGCCGGCACCTCGCC                                    |        |        |        |                                                 |               |          |                       |
| 119098                                                           | 119164 | 118983 | 120305 | CDS product envelope glycoprotein G             | 119098-119164 | 10:07:02 |                       |
| CCGCAACAGCCTGGGGCCCCTTCGCCCCGCTGGGGCCCCGAGACCTGGGAGCCTTGACCTGGCC |        |        |        |                                                 |               |          |                       |
| 119146                                                           | 119177 | 118983 | 120305 | CDS product envelope glycoprotein G             | 119146-119177 | 5:02:01  |                       |
| GGGAGCCTTGACCTGGCCTCGCGGATTTCGG                                  |        |        |        |                                                 |               |          |                       |
| 119570                                                           | 119602 | 118983 | 120305 | CDS product envelope glycoprotein G             | 119570-119602 | 7:04:01  |                       |
| GGGCTGGACCGGGGATCGGCGCGCCCTGGGG                                  |        |        |        |                                                 |               |          |                       |
| 119623                                                           | 119639 | 118983 | 120305 | CDS product envelope glycoprotein G             | 119623-119639 | 4:01:01  | GGTCCTGTCTCGAGGAGG    |
| 119910                                                           | 119936 | 118983 | 120305 | CDS product envelope glycoprotein G             | 119910-119936 | 6:03:01  |                       |
| CCATGCCCCCTTGGCCTGCCGGCCGGCC                                     |        |        |        |                                                 |               |          |                       |
| 120007                                                           | 120023 | 118983 | 120305 | CDS product envelope glycoprotein G             | 120007-120023 | 5:02:01  | GGCGGCGGTGGTAGTGG     |
| 120029                                                           | 120085 | 118983 | 120305 | CDS product envelope glycoprotein G             | 120029-120085 | 11:08:02 |                       |
| CCACCACGCCCCAGAAGTCCGCCGCTCCGAGCGCGCTCCGATCCCCGGGCAACC           |        |        |        |                                                 |               |          |                       |
| 120211                                                           | 120235 | 118983 | 120305 | CDS product envelope glycoprotein G             | 120211-120235 | 5:02:01  |                       |
| CCAGCTCGCCCGCAAGGCCACCGCC                                        |        |        |        |                                                 |               |          |                       |
| 120246                                                           | 120265 | 118983 | 120305 | CDS product envelope glycoprotein G             | 120246-120265 | 4:01:01  | CCCGCGCCGCCAGTTTGCC   |
| 120654                                                           | 120674 | 120560 | 121813 | CDS product envelope glycoprotein D             | 120654-120674 | 5:02:01  | CCCGCCGGCGTACCCGCCGCC |
| 120704                                                           | 120739 | 120560 | 121813 | CDS product envelope glycoprotein D             | 120704-120739 | 7:04:01  |                       |
| CCACCGGGCCCATCCCGTCGCCCTTCCAGGACGGCC                             |        |        |        |                                                 |               |          |                       |
| 120966                                                           | 120983 | 120560 | 121813 | CDS product envelope glycoprotein D             | 120966-120983 | 4:01:01  | CCGCTACCGCACGCCCCC    |

|                                                                             |        |        |        |                                     |               |          |                          |
|-----------------------------------------------------------------------------|--------|--------|--------|-------------------------------------|---------------|----------|--------------------------|
| 120989                                                                      | 121007 | 120560 | 121813 | CDS product envelope glycoprotein D | 120989-121007 | 4:01:01  | GGGACGGCTTCCTGGCGGG      |
| 121035                                                                      | 121051 | 120560 | 121813 | CDS product envelope glycoprotein D | 121035-121051 | 4:01:01  | GGGGCTGGTCATGGCGG        |
| 121187                                                                      | 121210 | 120560 | 121813 | CDS product envelope glycoprotein D | 121187-121210 | 4:01:01  | CCTTCGGCGCCTGCTTCCCGATCC |
| 121357                                                                      | 121368 | 120560 | 121813 | CDS product envelope glycoprotein D | 121357-121368 | 4:01:01  | CCGCCGCCGCC              |
| 121379                                                                      | 121395 | 120560 | 121813 | CDS product envelope glycoprotein D | 121379-121395 | 4:01:01  | CCTCTCCCGCACCGCCC        |
| 121408                                                                      | 121486 | 120560 | 121813 | CDS product envelope glycoprotein D | 121408-121486 | 17:14:04 |                          |
| GGCGAGGCCACGGAGAAGGCGGCGGGAAGAGGACGGAGCCGGCGGCAGGAGACCGGCGGCGAGGGGAGGGCCCGG |        |        |        |                                     |               |          |                          |
| 121482                                                                      | 121545 | 120560 | 121813 | CDS product envelope glycoprotein D | 121482-121545 | 10:07:02 |                          |
| CCCGGCCCGCGCTGGGCGGACGGCGCCCCCGGGCGAGCCGAAGCCGGCCCCGGCGGCCCC                |        |        |        |                                     |               |          |                          |
| 121531                                                                      | 121552 | 120560 | 121813 | CDS product envelope glycoprotein D | 121531-121552 | 5:02:01  | GGCCCCGGCGCCCCGGCGCGG    |
| 121600                                                                      | 121643 | 120560 | 121813 | CDS product envelope glycoprotein D | 121600-121643 | 11:08:02 |                          |
| CCCCCGCCACCCCCGCCACGCCCGCCCCCTACTGCCCTGCC                                   |        |        |        |                                     |               |          |                          |
| 121644                                                                      | 121675 | 120560 | 121813 | CDS product envelope glycoprotein D | 121644-121675 | 6:03:01  |                          |
| GGTCGGCATCGGGGTCGGCATCGCGGCCGCGG                                            |        |        |        |                                     |               |          |                          |
| 121691                                                                      | 121707 | 120560 | 121813 | CDS product envelope glycoprotein D | 121691-121707 | 5:02:01  | CCGCCCGCGGTGCCGCC        |
| 121984                                                                      | 122010 | 121963 | 123126 | CDS product envelope glycoprotein I | 121984-122010 | 6:03:01  |                          |
| GGGTGGCGGCGCTGGCCGCGGGGCGG                                                  |        |        |        |                                     |               |          |                          |
| 122037                                                                      | 122050 | 121963 | 123126 | CDS product envelope glycoprotein I | 122037-122050 | 4:01:01  | GGCGAGGCGGTCGG           |
| 122080                                                                      | 122093 | 121963 | 123126 | CDS product envelope glycoprotein I | 122080-122093 | 4:01:01  | CCGTCCACCCAGCC           |
| 122129                                                                      | 122150 | 121963 | 123126 | CDS product envelope glycoprotein I | 122129-122150 | 4:01:01  | CCTGGAGCACCAGTCCCGGCC    |
| 122227                                                                      | 122245 | 121963 | 123126 | CDS product envelope glycoprotein I | 122227-122245 | 4:01:01  | CCGCGTTCGCCTCCTGCC       |
| 122263                                                                      | 122285 | 121963 | 123126 | CDS product envelope glycoprotein I | 122263-122285 | 5:02:01  | CCTTCCGCTCCTGCCTGCACGCC  |
| 122350                                                                      | 122372 | 121963 | 123126 | CDS product envelope glycoprotein I | 122350-122372 | 5:02:01  | CCATCGCCGGCCCGCGCCCGGCC  |

|                                                                              |        |        |        |                                     |               |          |                         |
|------------------------------------------------------------------------------|--------|--------|--------|-------------------------------------|---------------|----------|-------------------------|
| 122400                                                                       | 122422 | 121963 | 123126 | CDS product envelope glycoprotein I | 122400-122422 | 4:01:01  | GGCATCGACGGCGGCGCCGAGGG |
| 122416                                                                       | 122436 | 121963 | 123126 | CDS product envelope glycoprotein I | 122416-122436 | 4:01:01  | CCGAGGGCGCCGAGCGCCGCC   |
| 122481                                                                       | 122531 | 121963 | 123126 | CDS product envelope glycoprotein I | 122481-122531 | 8:05:02  |                         |
| CCCGGCTCCGACGACCCGAGGCCGCGACCGCGCCCCGGCGGCGCCGCC                             |        |        |        |                                     |               |          |                         |
| 122520                                                                       | 122544 | 121963 | 123126 | CDS product envelope glycoprotein I | 122520-122544 | 4:01:01  |                         |
| GGCGGCGCCGCCGGGCGATCGCGG                                                     |        |        |        |                                     |               |          |                         |
| 122610                                                                       | 122645 | 121963 | 123126 | CDS product envelope glycoprotein I | 122610-122645 | 8:05:02  |                         |
| CCCGCGGGCGCCGCCCGCTACGCCCACCCCCACC                                           |        |        |        |                                     |               |          |                         |
| 122648                                                                       | 122665 | 121963 | 123126 | CDS product envelope glycoprotein I | 122648-122665 | 5:02:01  | GGACGGCGGGGGCGAAGG      |
| 122678                                                                       | 122715 | 121963 | 123126 | CDS product envelope glycoprotein I | 122678-122715 | 6:03:01  |                         |
| GGATCAGCCGGGGAGACGTCGGAGACGGGACGAGGG                                         |        |        |        |                                     |               |          |                         |
| 122720                                                                       | 122800 | 121963 | 123126 | CDS product envelope glycoprotein I | 122720-122800 | 17:14:04 |                         |
| CCTGACCCCCGACCCGCCGCGACCCGACCCCCCGCTACGCCCCGGCACCCGCCACAACCTCCTCCTCCCGCGCTCC |        |        |        |                                     |               |          |                         |
| 122801                                                                       | 122817 | 121963 | 123126 | CDS product envelope glycoprotein I | 122801-122817 | 4:01:01  | GGGCGGGCCGGCGCGG        |
| 122945                                                                       | 122967 | 121963 | 123126 | CDS product envelope glycoprotein I | 122945-122967 | 5:02:01  | CCGCCGCCTGCTGCCGTGCTCCC |
| 123048                                                                       | 123065 | 121963 | 123126 | CDS product envelope glycoprotein I | 123048-123065 | 4:01:01  | CCGATCGCCCCTGCCACC      |
| 123087                                                                       | 123110 | 121963 | 123126 | CDS product envelope glycoprotein I | 123087-123110 | 5:02:01  | CCGAAGGCGCCCCCCTCGCCACC |
| 123421                                                                       | 123439 | 123415 | 125214 | CDS product envelope glycoprotein E | 123421-123439 | 5:02:01  | CCACCGCGCCGCCCGGCC      |
| 123489                                                                       | 123514 | 123415 | 125214 | CDS product envelope glycoprotein E | 123489-123514 | 5:02:01  |                         |
| GGGCTACCGGTCGGGGCCGGCCTTGG                                                   |        |        |        |                                     |               |          |                         |
| 123505                                                                       | 123542 | 123415 | 125214 | CDS product envelope glycoprotein E | 123505-123542 | 7:04:01  |                         |
| CCGGCCTTGCCCCAGCCCCAGCCCCGAAGCCGACACC                                        |        |        |        |                                     |               |          |                         |
| 123543                                                                       | 123567 | 123415 | 125214 | CDS product envelope glycoprotein E | 123543-123567 | 5:02:01  |                         |

|                                                             |        |        |        |                                     |               |          |                         |
|-------------------------------------------------------------|--------|--------|--------|-------------------------------------|---------------|----------|-------------------------|
| GGGGCAAAGGCCCGCGCGCGG                                       |        |        |        |                                     |               |          |                         |
| 123591                                                      | 123623 | 123415 | 125214 | CDS product envelope glycoprotein E | 123591-123623 | 6:03:01  |                         |
| CCCGTCTTCCTCCCTGGGCCTGACCCGCGCCCC                           |        |        |        |                                     |               |          |                         |
| 123668                                                      | 123705 | 123415 | 125214 | CDS product envelope glycoprotein E | 123668-123705 | 7:04:01  |                         |
| CCCACCGCCCGAGCCGACGCCGCTCTGCCTCGACGACC                      |        |        |        |                                     |               |          |                         |
| 123896                                                      | 123907 | 123415 | 125214 | CDS product envelope glycoprotein E | 123896-123907 | 4:01:01  | GGAGGACGGCGG            |
| 123917                                                      | 123944 | 123415 | 125214 | CDS product envelope glycoprotein E | 123917-123944 | 5:02:01  |                         |
| CCTGTACGACCGGGCCCGCGGCGACGCC                                |        |        |        |                                     |               |          |                         |
| 123928                                                      | 123954 | 123415 | 125214 | CDS product envelope glycoprotein E | 123928-123954 | 4:01:01  |                         |
| GGGCCCGCGGCGACCGCGGCGACGAGG                                 |        |        |        |                                     |               |          |                         |
| 124011                                                      | 124062 | 123415 | 125214 | CDS product envelope glycoprotein E | 124011-124062 | 11:08:02 |                         |
| GGGCAGGGCGAGGGCGGGAAGGGGAAGGGGGGCGAGGGGCGG                  |        |        |        |                                     |               |          |                         |
| 124063                                                      | 124135 | 123415 | 125214 | CDS product envelope glycoprotein E | 124063-124135 | 18:15:04 |                         |
| CCAAGCCACCCCCACCCCCACCCCCGCCCCAGCCCCCCCCGCGCCCCCGCGCCCCCCCC |        |        |        |                                     |               |          |                         |
| 124138                                                      | 124150 | 123415 | 125214 | CDS product envelope glycoprotein E | 124138-124150 | 4:01:01  | GGCGCGGCACGG            |
| 124334                                                      | 124363 | 123415 | 125214 | CDS product envelope glycoprotein E | 124334-124363 | 6:03:01  |                         |
| CCACCCGAGGCGCCGCGCTGCCTGCACCC                               |        |        |        |                                     |               |          |                         |
| 124392                                                      | 124409 | 123415 | 125214 | CDS product envelope glycoprotein E | 124392-124409 | 4:01:01  | CCCTACCGCTCCGAGACC      |
| 124436                                                      | 124462 | 123415 | 125214 | CDS product envelope glycoprotein E | 124436-124462 | 7:04:01  |                         |
| CCGCCCAGCCTCCGCCACCGCTGGCC                                  |        |        |        |                                     |               |          |                         |
| 124545                                                      | 124568 | 123415 | 125214 | CDS product envelope glycoprotein E | 124545-124568 | 4:01:01  | GGCGCGCGGCCTCGGCCTCGGGG |
| 124596                                                      | 124614 | 123415 | 125214 | CDS product envelope glycoprotein E | 124596-124614 | 4:01:01  | GGCCACGTGGAGGCCTGGG     |
| 124654                                                      | 124723 | 123415 | 125214 | CDS product envelope glycoprotein E | 124654-124723 | 14:11:03 |                         |



|                                                                              |        |        |        |                                      |               |                                 |
|------------------------------------------------------------------------------|--------|--------|--------|--------------------------------------|---------------|---------------------------------|
| CCGTCACCGACCACACGCGCCCCGCGCCGCCGACGCCCCGAGCCGAGCCCGCCGCCCGCCGACGGGCC         |        |        |        |                                      |               |                                 |
| 124765                                                                       | 124818 | 123415 | 125214 | CDS product envelope glycoprotein E  | 124765-124818 | 8:05:02                         |
| GGCTCGTGGTGCTGGGGGGCGCGCTCGGGCTCGCGGGCCTAATCGGCGTCGCGG                       |        |        |        |                                      |               |                                 |
| 124900                                                                       | 124921 | 123415 | 125214 | CDS product envelope glycoprotein E  | 124900-124921 | 5:02:01 CCAGCCTGCCGACCAACGAGCC  |
| 125014                                                                       | 125091 | 123415 | 125214 | CDS product envelope glycoprotein E  | 125014-125091 | 15:12:03                        |
| CCGACGAGCCCCCGCCACCGCCGCTACGACCTCGCCGGGCCCCGCCAGGGGGCCGCGGGCCCCGCGCGCCCGAGCC |        |        |        |                                      |               |                                 |
| 125063                                                                       | 125075 | 123415 | 125214 | CDS product envelope glycoprotein E  | 125063-125075 | 4:01:01 GGGGGCCGGCGGG           |
| 125096                                                                       | 125118 | 123415 | 125214 | CDS product envelope glycoprotein E  | 125096-125118 | 4:01:01 GGGCTTCAAGTCTGGTTTAGGG  |
| 125145                                                                       | 125167 | 123415 | 125214 | CDS product envelope glycoprotein E  | 125145-125167 | 4:01:01 CCGGCGCGGCCCCAGACCGCGCC |
| 125180                                                                       | 125192 | 123415 | 125214 | CDS product envelope glycoprotein E  | 125180-125192 | 4:01:01 GGTGGCGGCGCGG           |
| 125340                                                                       | 125383 | 125306 | 125710 | CDS product membrane protein US9     | 125340-125383 | 8:05:02                         |
| CCGGGGCGCCGACGCGGCCGACGCCGAAGCCCTCCGCCGCCCC                                  |        |        |        |                                      |               |                                 |
| 125451                                                                       | 125467 | 125306 | 125710 | CDS product membrane protein US9     | 125451-125467 | 4:01:01 GCGGCGGCCGCGCCGG        |
| 125571                                                                       | 125604 | 125306 | 125710 | CDS product membrane protein US9     | 125571-125604 | 8:05:02                         |
| GGGGCGGCAGCAGCGGGCGGCACCGGCGGCGG                                             |        |        |        |                                      |               |                                 |
| 125613                                                                       | 125672 | 125306 | 125710 | CDS product membrane protein US9     | 125613-125672 | 11:08:02                        |
| GGTGGCGGCGGCGCTGGCCTGTGCGGGGCTTGGGGCCTGCGCGGCCGCCGCGGCGGCGGG                 |        |        |        |                                      |               |                                 |
| 126734                                                                       | 126749 | 126724 | 127668 | CDS product regulatory protein ICP22 | 126734-126749 | 4:01:01 GCGGCGCCTGGGCGG         |
| 126765                                                                       | 126805 | 126724 | 127668 | CDS product regulatory protein ICP22 | 126765-126805 | 8:05:02                         |
| GGGGGACGGGCCCGGCGACGAGCCGTCGAGGAGCCGGAGG                                     |        |        |        |                                      |               |                                 |
| 126819                                                                       | 126837 | 126724 | 127668 | CDS product regulatory protein ICP22 | 126819-126837 | 5:02:01 GGGCGCGGGGCGGCGCGG      |
| 126869                                                                       | 126892 | 126724 | 127668 | CDS product regulatory protein ICP22 | 126869-126892 | 6:03:01                         |
| GGGGGTTGTCGCGGCCGCGGCGG                                                      |        |        |        |                                      |               |                                 |

|                                                                  |        |        |        |                                            |               |          |                      |
|------------------------------------------------------------------|--------|--------|--------|--------------------------------------------|---------------|----------|----------------------|
| 126898                                                           | 126917 | 126724 | 127668 | CDS product regulatory protein ICP22       | 126898-126917 | 5:02:01  | CCGCCGCCGCCGTTGGCGCC |
| 127029                                                           | 127096 | 126724 | 127668 | CDS product regulatory protein ICP22       | 127029-127096 | 15:12:03 |                      |
| GGACGACGAGGACGACGAGGCCGAGGACCGGGAGGAGCGCGGAGGAAGAGGGGGCCCGAGGCGG |        |        |        |                                            |               |          |                      |
| 127115                                                           | 127129 | 126724 | 127668 | CDS product regulatory protein ICP22       | 127115-127129 | 4:01:01  | GGGAGGGGACGGCGG      |
| 127240                                                           | 127262 | 126724 | 127668 | CDS product regulatory protein ICP22       | 127240-127262 | 5:02:01  |                      |
| GGGCCCCGCAGGCGCGCCGGGGG                                          |        |        |        |                                            |               |          |                      |
| 127313                                                           | 127337 | 126724 | 127668 | CDS product regulatory protein ICP22       | 127313-127337 | 4:01:01  |                      |
| GGTGCAGCGGGCCGCGCTGCTCGGG                                        |        |        |        |                                            |               |          |                      |
| 127531                                                           | 127557 | 126724 | 127668 | CDS product regulatory protein ICP22       | 127531-127557 | 5:02:01  |                      |
| GGGCAGAAGGCGCCAGGCCCGCGGCGG                                      |        |        |        |                                            |               |          |                      |
| 127567                                                           | 127630 | 126724 | 127668 | CDS product regulatory protein ICP22       | 127567-127630 | 11:08:02 |                      |
| GGGCCCCGCTGGGCAGGCGCGGGCCCTGGGAGCACGCGGTCGGGCGAGCGGCAGAGGCGGCAGG |        |        |        |                                            |               |          |                      |
| 132596                                                           | 132633 | 132535 | 136761 | CDS product transcriptional regulator ICP4 | 132596-132633 | 9:06:02  |                      |
| GGACCTCGGCCCGGAGGGGGCCCGGAGGAGGACCCGG                            |        |        |        |                                            |               |          |                      |
| 132674                                                           | 132692 | 132535 | 136761 | CDS product transcriptional regulator ICP4 | 132674-132692 | 4:01:01  |                      |
| CCGGCGGGCCGCCCGCGCC                                              |        |        |        |                                            |               |          |                      |
| 132698                                                           | 132729 | 132535 | 136761 | CDS product transcriptional regulator ICP4 | 132698-132729 | 7:04:01  |                      |
| GGCGGAGCTGTGGCGCATGGTGGCCGCGGGG                                  |        |        |        |                                            |               |          |                      |
| 132764                                                           | 132816 | 132535 | 136761 | CDS product transcriptional regulator ICP4 | 132764-132816 | 12:09:03 |                      |
| GGGGGAGGAGGAAGAGGAGGACCCGAGAACCCGGGGGGCCCGGGGGCCTCGG             |        |        |        |                                            |               |          |                      |
| 132785                                                           | 132832 | 132535 | 136761 | CDS product transcriptional regulator ICP4 | 132785-132832 | 7:04:01  |                      |
| CCCGGAGAACCCGGGGGGCCCGGGGGCCTCGGCGCCCTCCGAGGCCCC                 |        |        |        |                                            |               |          |                      |
| 132827                                                           | 132894 | 132535 | 136761 | CDS product transcriptional regulator ICP4 | 132827-132894 | 12:09:03 |                      |

|                                                                        |               |          |                 |
|------------------------------------------------------------------------|---------------|----------|-----------------|
| GGCCCCAGAGGACGCCGCGCCGGGGCGCCTGGGCCGCGCGGGCGCTCGCGCCGCGGCGGAGG         |               |          |                 |
| 132841 132863 132535 136761 CDS product transcriptional regulator ICP4 | 132841-132863 | 4:01:01  |                 |
| CCGCGGCCGGGGCGCCTGGGCC                                                 |               |          |                 |
| 132898 132920 132535 136761 CDS product transcriptional regulator ICP4 | 132898-132920 | 5:02:01  |                 |
| CCGCCGCCGAAGCCGAGCGGCC                                                 |               |          |                 |
| 132914 132942 132535 136761 CDS product transcriptional regulator ICP4 | 132914-132942 | 6:03:01  |                 |
| GGCGCCGCGGCTGAGGCGCCGTCGTGG                                            |               |          |                 |
| 132934 132951 132535 136761 CDS product transcriptional regulator ICP4 | 132934-132951 | 4:01:01  |                 |
| CCGTCGTGGCCGCCGCC                                                      |               |          |                 |
| 132972 132986 132535 136761 CDS product transcriptional regulator ICP4 | 132972-132986 | 4:01:01  | CCGCCGCCTGCGCCC |
| 133036 133067 132535 136761 CDS product transcriptional regulator ICP4 | 133036-133067 | 6:03:01  |                 |
| CCGAAGCCAGGCCAAGCCCGAGCCGGGACC                                         |               |          |                 |
| 133081 133103 132535 136761 CDS product transcriptional regulator ICP4 | 133081-133103 | 5:02:01  |                 |
| CCGCCGACTCCGGGGCCGATGCC                                                |               |          |                 |
| 133114 133134 132535 136761 CDS product transcriptional regulator ICP4 | 133114-133134 | 4:01:01  |                 |
| GGGTTGGGGATGACACGGGGG                                                  |               |          |                 |
| 133135 133151 132535 136761 CDS product transcriptional regulator ICP4 | 133135-133151 | 5:02:01  |                 |
| CCGCCGCCGCCGCGGCC                                                      |               |          |                 |
| 133158 133190 132535 136761 CDS product transcriptional regulator ICP4 | 133158-133190 | 6:03:01  |                 |
| GGATTAGGGACTCGGGGCGGGGACTCGGGG                                         |               |          |                 |
| 133202 133223 132535 136761 CDS product transcriptional regulator ICP4 | 133202-133223 | 4:01:01  |                 |
| GGGGAGCCCTGGCGCCGGGGG                                                  |               |          |                 |
| 133226 133288 132535 136761 CDS product transcriptional regulator ICP4 | 133226-133288 | 11:08:02 |                 |

|                                                                        |               |         |                  |
|------------------------------------------------------------------------|---------------|---------|------------------|
| CCCCGCCGGACCCGCCGCGGATCCAGCCAAGGCCAGGGCCGCGCCCTCGCCGCGGCGCCC           |               |         |                  |
| 133374 133394 132535 136761 CDS product transcriptional regulator ICP4 | 133374-133394 | 4:01:01 |                  |
| CCCTCCGGCGAGGCCTGGCCC                                                  |               |         |                  |
| 133380 133396 132535 136761 CDS product transcriptional regulator ICP4 | 133380-133396 | 4:01:01 |                  |
| GGCGAGGCCTGGCCCGG                                                      |               |         |                  |
| 133404 133419 132535 136761 CDS product transcriptional regulator ICP4 | 133404-133419 | 5:02:01 | CCGCCGCCGCCCGGCC |
| 133502 133521 132535 136761 CDS product transcriptional regulator ICP4 | 133502-133521 | 4:01:01 |                  |
| GGCGGCCGCGGGCCCGCGG                                                    |               |         |                  |
| 133535 133553 132535 136761 CDS product transcriptional regulator ICP4 | 133535-133553 | 4:01:01 |                  |
| GGAGATGGGGGACGCGGG                                                     |               |         |                  |
| 133565 133581 132535 136761 CDS product transcriptional regulator ICP4 | 133565-133581 | 4:01:01 |                  |
| GGCGCTGGTGGACCTGG                                                      |               |         |                  |
| 133789 133809 132535 136761 CDS product transcriptional regulator ICP4 | 133789-133809 | 4:01:01 |                  |
| CCTGCGTGGCCATGAGCCGCC                                                  |               |         |                  |
| 133866 133892 132535 136761 CDS product transcriptional regulator ICP4 | 133866-133892 | 5:02:01 |                  |
| CCCATGGCCTACCCGGAGGCCGCGGCC                                            |               |         |                  |
| 133871 133903 132535 136761 CDS product transcriptional regulator ICP4 | 133871-133903 | 7:04:01 |                  |
| GGCCTACCCGGAGGCCGCGCCGCGGCGCGGG                                        |               |         |                  |
| 133956 133985 132535 136761 CDS product transcriptional regulator ICP4 | 133956-133985 | 6:03:01 |                  |
| CCGGCGCCGCTGCCGCCAGCGCCCGGGCCC                                         |               |         |                  |
| 134045 134063 132535 136761 CDS product transcriptional regulator ICP4 | 134045-134063 | 4:01:01 |                  |
| GGCGCTAGAGGCGGCGCGG                                                    |               |         |                  |
| 134105 134145 132535 136761 CDS product transcriptional regulator ICP4 | 134105-134145 | 6:03:01 |                  |

[illegible]

|        |        |        |        |                                                                                              |               |         |                |
|--------|--------|--------|--------|----------------------------------------------------------------------------------------------|---------------|---------|----------------|
| 134962 | 134979 | 132535 | 136761 | CDS product transcriptional regulator ICP4<br>CCGCCGGCCCTGCCGCC                              | 134962-134979 | 5:02:01 |                |
| 134995 | 135017 | 132535 | 136761 | CDS product transcriptional regulator ICP4<br>CCGCCGGCCCTCCCGCCGCC                           | 134995-135017 | 6:03:01 |                |
| 135032 | 135048 | 132535 | 136761 | CDS product transcriptional regulator ICP4<br>GGGGGCGGCCTCGAGG                               | 135032-135048 | 4:01:01 |                |
| 135041 | 135067 | 132535 | 136761 | CDS product transcriptional regulator ICP4<br>CCTCGAGCCCGCCGACGGCCGCC                        | 135041-135067 | 5:02:01 |                |
| 135086 | 135111 | 132535 | 136761 | CDS product transcriptional regulator ICP4<br>GGCCGGGCGCAGGGCCCGGCCGG                        | 135086-135111 | 5:02:01 |                |
| 135088 | 135139 | 132535 | 136761 | CDS product transcriptional regulator ICP4<br>CCGGGGCCAGGGCCCGGCCGCGCCAAAAGCCGCGCGCCGGGTCCCC | 135088-135139 | 9:06:02 |                |
| 135153 | 135168 | 132535 | 136761 | CDS product transcriptional regulator ICP4                                                   | 135153-135168 | 4:01:01 | CCGCCGCTGCCGCC |
| 135179 | 135206 | 132535 | 136761 | CDS product transcriptional regulator ICP4<br>CCCCATGCCGCCCGCGGCCCGCCGCC                     | 135179-135206 | 6:03:01 |                |
| 135218 | 135233 | 132535 | 136761 | CDS product transcriptional regulator ICP4                                                   | 135218-135233 | 4:01:01 | CCGCCGCTGCCGCC |
| 135242 | 135263 | 132535 | 136761 | CDS product transcriptional regulator ICP4<br>CCACACGCCCGCGCCCAGCGCC                         | 135242-135263 | 4:01:01 |                |
| 135293 | 135312 | 132535 | 136761 | CDS product transcriptional regulator ICP4<br>GGTCGCGCGCGGCTCGCGG                            | 135293-135312 | 4:01:01 |                |
| 135314 | 135343 | 132535 | 136761 | CDS product transcriptional regulator ICP4<br>CCACCCGCTCTTCCCCGAGCCCTGGCGCCC                 | 135314-135343 | 5:02:01 |                |
| 135436 | 135452 | 132535 | 136761 | CDS product transcriptional regulator ICP4                                                   | 135436-135452 | 4:01:01 |                |

|                                              |        |        |        |                                            |               |         |                 |
|----------------------------------------------|--------|--------|--------|--------------------------------------------|---------------|---------|-----------------|
| GGCGGCGCGTGGCCTGG                            |        |        |        |                                            |               |         |                 |
| 135513                                       | 135528 | 132535 | 136761 | CDS product transcriptional regulator ICP4 | 135513-135528 | 4:01:01 | GGGAGGCGCTGGCGG |
| 135551                                       | 135571 | 132535 | 136761 | CDS product transcriptional regulator ICP4 | 135551-135571 | 4:01:01 |                 |
| CCGCGGCGCTGAGTGGCCGCC                        |        |        |        |                                            |               |         |                 |
| 135553                                       | 135584 | 132535 | 136761 | CDS product transcriptional regulator ICP4 | 135553-135584 | 6:03:01 |                 |
| GGCGGCGCTGAGTGGCCGCCGCGTGGCGGCGGG            |        |        |        |                                            |               |         |                 |
| 135646                                       | 135672 | 132535 | 136761 | CDS product transcriptional regulator ICP4 | 135646-135672 | 5:02:01 |                 |
| GGGCCGGGTCCTGGACGGGCGCGCCGG                  |        |        |        |                                            |               |         |                 |
| 135760                                       | 135782 | 132535 | 136761 | CDS product transcriptional regulator ICP4 | 135760-135782 | 6:03:01 |                 |
| GGCTGGCCGCGGCGCGGCGGCGG                      |        |        |        |                                            |               |         |                 |
| 135828                                       | 135846 | 132535 | 136761 | CDS product transcriptional regulator ICP4 | 135828-135846 | 4:01:01 |                 |
| GGCCCGGCCGTCGGGCAGG                          |        |        |        |                                            |               |         |                 |
| 136057                                       | 136096 | 132535 | 136761 | CDS product transcriptional regulator ICP4 | 136057-136096 | 7:04:01 |                 |
| CCACGCGCCTGGGCCCCGCGACCGCGGTGCCCGTGCCGCC     |        |        |        |                                            |               |         |                 |
| 136126                                       | 136149 | 132535 | 136761 | CDS product transcriptional regulator ICP4 | 136126-136149 | 4:01:01 |                 |
| GGCTCGACGGGCGCAAGGACATGG                     |        |        |        |                                            |               |         |                 |
| 136163                                       | 136206 | 132535 | 136761 | CDS product transcriptional regulator ICP4 | 136163-136206 | 8:05:02 |                 |
| GGCGCTGGGGCTCGGGGAGCCGGAATTCGCGGAGGGCGAGGCGG |        |        |        |                                            |               |         |                 |
| 136207                                       | 136227 | 132535 | 136761 | CDS product transcriptional regulator ICP4 | 136207-136227 | 6:03:01 |                 |
| CCAGCCACCGCGCCGCCAACC                        |        |        |        |                                            |               |         |                 |
| 136245                                       | 136268 | 132535 | 136761 | CDS product transcriptional regulator ICP4 | 136245-136268 | 4:01:01 |                 |
| CCGCTGCGGCGCGGTGTACCTGGCC                    |        |        |        |                                            |               |         |                 |
| 136252                                       | 136277 | 132535 | 136761 | CDS product transcriptional regulator ICP4 | 136252-136277 | 5:02:01 |                 |

|                                                                                 |        |        |        |                                            |               |          |                           |  |
|---------------------------------------------------------------------------------|--------|--------|--------|--------------------------------------------|---------------|----------|---------------------------|--|
| GGCCGGGTACCTGGCCTGCGGGCGG                                                       |        |        |        |                                            |               |          |                           |  |
| 136310                                                                          | 136323 | 132535 | 136761 | CDS product transcriptional regulator ICP4 | 136310-136323 | 4:01:01  | GGCCGCGGCGGTGG            |  |
| 136350                                                                          | 136369 | 132535 | 136761 | CDS product transcriptional regulator ICP4 | 136350-136369 | 4:01:01  |                           |  |
| CCGCACGCCGAGGCGCCGCC                                                            |        |        |        |                                            |               |          |                           |  |
| 136373                                                                          | 136387 | 132535 | 136761 | CDS product transcriptional regulator ICP4 | 136373-136387 | 4:01:01  | GGTGCTGGAGGCGGG           |  |
| 136390                                                                          | 136430 | 132535 | 136761 | CDS product transcriptional regulator ICP4 | 136390-136430 | 9:06:02  |                           |  |
| CCGCCCCCGCGCCCGCGGGCCGCGCCCGCGGTGGCC                                            |        |        |        |                                            |               |          |                           |  |
| 136409                                                                          | 136491 | 132535 | 136761 | CDS product transcriptional regulator ICP4 | 136409-136491 | 14:11:03 |                           |  |
| GGCCGCGCGCCCGCGGTGGCCTGGGACGCGGACCAGGGCCCGGGAGACGCTGGTGCAGGCGCGGCGGGCGGCGTCCCGG |        |        |        |                                            |               |          |                           |  |
| 136519                                                                          | 136537 | 132535 | 136761 | CDS product transcriptional regulator ICP4 | 136519-136537 | 4:01:01  |                           |  |
| CCCCGCGGCCTGGGCGCC                                                              |        |        |        |                                            |               |          |                           |  |
| 136553                                                                          | 136603 | 132535 | 136761 | CDS product transcriptional regulator ICP4 | 136553-136603 | 10:07:02 |                           |  |
| GGGCACGGA CTCGGCTTCCGGGGCCGGCGACGGCGGCATCGGCGGGGGG                              |        |        |        |                                            |               |          |                           |  |
| 136605                                                                          | 136633 | 132535 | 136761 | CDS product transcriptional regulator ICP4 | 136605-136633 | 6:03:01  |                           |  |
| CCGCGCCGCGCCCGGCCCGGCCCGGCC                                                     |        |        |        |                                            |               |          |                           |  |
| 136618                                                                          | 136656 | 132535 | 136761 | CDS product transcriptional regulator ICP4 | 136618-136656 | 7:04:01  |                           |  |
| GGCCCCGGCCCCGGCCGCGGCGGGCCGGCGCGCGTGG                                           |        |        |        |                                            |               |          |                           |  |
| 136666                                                                          | 136706 | 132535 | 136761 | CDS product transcriptional regulator ICP4 | 136666-136706 | 8:05:02  |                           |  |
| CCTCGTCCGCGTCCTCCGCGTCCTCCTCGTCGTCCGCGTCC                                       |        |        |        |                                            |               |          |                           |  |
| gi 51557483 ref NC_006151.1  Suid herpesvirus 1, complete genome                |        |        |        |                                            |               |          |                           |  |
| 1651                                                                            | 1674   | 1636   | 2259   | CDS product membrane protein UL56          | 1651-1674     | 5:02:01  | CCCGCGGGGCCCCCGCGCGCCGCC  |  |
| 1685                                                                            | 1709   | 1636   | 2259   | CDS product membrane protein UL56          | 1685-1709     | 5:02:01  | CCCGCCCGATCCCGGCAGCCTCGCC |  |



|                                    |      |      |      |                                                  |           |         |                             |
|------------------------------------|------|------|------|--------------------------------------------------|-----------|---------|-----------------------------|
| 1725                               | 1744 | 1636 | 2259 | CDS product membrane protein UL56                | 1725-1744 | 6:03:01 | GGGGGAGGAGCGGCGGAGG         |
| 1783                               | 1799 | 1636 | 2259 | CDS product membrane protein UL56                | 1783-1799 | 4:01:01 | CCGTCGCCTCGGCCCCC           |
| 1820                               | 1846 | 1636 | 2259 | CDS product membrane protein UL56                | 1820-1846 | 5:02:01 | GGAGGCTCTCGGACTCGGCGCCCCCGG |
| 1840                               | 1862 | 1636 | 2259 | CDS product membrane protein UL56                | 1840-1862 | 6:03:01 | CCCCCGGCTCCAGACCGCCCTCC     |
| 1882                               | 1915 | 1636 | 2259 | CDS product membrane protein UL56                | 1882-1915 | 6:03:01 |                             |
| CCGGGCCGCGCCCGCACCGATCGCCGGACACGCC |      |      |      |                                                  |           |         |                             |
| 1924                               | 1943 | 1636 | 2259 | CDS product membrane protein UL56                | 1924-1943 | 5:02:01 | CCCGGGGCCCGCCCCGTCC         |
| 1987                               | 2003 | 1636 | 2259 | CDS product membrane protein UL56                | 1987-2003 | 4:01:01 | CCATCCCGGACCCGCC            |
| 2028                               | 2046 | 1636 | 2259 | CDS product membrane protein UL56                | 2028-2046 | 4:01:01 | CCGCAGCCGCCGAGGCCCC         |
| 2093                               | 2113 | 1636 | 2259 | CDS product membrane protein UL56                | 2093-2113 | 4:01:01 | CCCCTTCAGCCAGTGCCTCCC       |
| 2122                               | 2155 | 1636 | 2259 | CDS product membrane protein UL56                | 2122-2155 | 6:03:01 |                             |
| CCTGCCCCGACTGCCGCTACCCCGAAGACCGCCC |      |      |      |                                                  |           |         |                             |
| 2800                               | 2812 | 2730 | 3815 | CDS product multifunctional expression regulator | 2800-2812 | 4:01:01 |                             |
| GGCGGCAGGTGGG                      |      |      |      |                                                  |           |         |                             |
| 2839                               | 2860 | 2730 | 3815 | CDS product multifunctional expression regulator | 2839-2860 | 4:01:01 |                             |
| CCAGCGGTCCATGATCCCGCC              |      |      |      |                                                  |           |         |                             |
| 3100                               | 3116 | 2730 | 3815 | CDS product multifunctional expression regulator | 3100-3116 | 4:01:01 |                             |
| CCGCCCCCGGGTGGCC                   |      |      |      |                                                  |           |         |                             |
| 3283                               | 3305 | 2730 | 3815 | CDS product multifunctional expression regulator | 3283-3305 | 5:02:01 |                             |
| GGCGGTGCAGGTCCGCCCCGTGG            |      |      |      |                                                  |           |         |                             |
| 3370                               | 3385 | 2730 | 3815 | CDS product multifunctional expression regulator | 3370-3385 | 4:01:01 |                             |
| GGACGGCGGCCACGG                    |      |      |      |                                                  |           |         |                             |
| 3548                               | 3582 | 2730 | 3815 | CDS product multifunctional expression regulator | 3548-3582 | 8:05:02 |                             |

|                                                           |      |      |      |                                                  |           |           |                         |
|-----------------------------------------------------------|------|------|------|--------------------------------------------------|-----------|-----------|-------------------------|
| CCCGCCGTCCGGACGATCCGCCTCCTGTCGCCGCC                       |      |      |      |                                                  |           |           |                         |
| 3620                                                      | 3641 | 2730 | 3815 | CDS product multifunctional expression regulator |           | 3620-3641 | 5:02:01                 |
| CCGCCGCCGCTGCCGCAGGGCC                                    |      |      |      |                                                  |           |           |                         |
| 3656                                                      | 3714 | 2730 | 3815 | CDS product multifunctional expression regulator |           | 3656-3714 | 12:09:03                |
| CCCGCCGCGACCCCCGCGCCGGCGCCGATGGCCCCAGCCGCGCCCGGACGGGCCGCC |      |      |      |                                                  |           |           |                         |
| 3748                                                      | 3790 | 2730 | 3815 | CDS product multifunctional expression regulator |           | 3748-3790 | 7:04:01                 |
| CCGGGCGCCGCTCCTCGCTCCCCGACCTGGACGCCTCGTGCC                |      |      |      |                                                  |           |           |                         |
| 4100                                                      | 4128 | 3895 | 4833 | CDS product envelope glycoprotein K              | 4100-4128 | 6:03:01   |                         |
| CCGCCAGGAGCTCCAGCGCCCCGACCGCC                             |      |      |      |                                                  |           |           |                         |
| 4296                                                      | 4317 | 3895 | 4833 | CDS product envelope glycoprotein K              | 4296-4317 | 4:01:01   | GGGGTCCTCGCGGAGGTCGCGG  |
| 4435                                                      | 4467 | 3895 | 4833 | CDS product envelope glycoprotein K              | 4435-4467 | 6:03:01   |                         |
| GGGGTCAGGAAGTTCGGCGGGTTCGCGGAAGGGG                        |      |      |      |                                                  |           |           |                         |
| 4556                                                      | 4575 | 3895 | 4833 | CDS product envelope glycoprotein K              | 4556-4575 | 4:01:01   | GGTAGGCGCGGCAGTCGCGG    |
| 4667                                                      | 4688 | 3895 | 4833 | CDS product envelope glycoprotein K              | 4667-4688 | 5:02:01   | CCTCCCAGTCCGGCGCGCCCCC  |
| 4728                                                      | 4750 | 3895 | 4833 | CDS product envelope glycoprotein K              | 4728-4750 | 5:02:01   | GGGGTGGGGCAGGCGGGCGACGG |
| 4796                                                      | 4815 | 3895 | 4833 | CDS product envelope glycoprotein K              | 4796-4815 | 4:01:01   | GGACGAGGAGGTGCAGCGGG    |
| 4945                                                      | 4970 | 4788 | 7676 | CDS product helicase-primase primase subunit     |           | 4945-4970 | 5:02:01                 |
| GGGCCACGAAGGTGCGGGCCGGCGGG                                |      |      |      |                                                  |           |           |                         |
| 5128                                                      | 5153 | 4788 | 7676 | CDS product helicase-primase primase subunit     |           | 5128-5153 | 5:02:01                 |
| CCATGGCCACGTCCGCCACGAAGGCC                                |      |      |      |                                                  |           |           |                         |
| 5165                                                      | 5191 | 4788 | 7676 | CDS product helicase-primase primase subunit     |           | 5165-5191 | 6:03:01                 |
| CCGGTCCTCCGCGTCCACGGCCAGGCC                               |      |      |      |                                                  |           |           |                         |
| 5390                                                      | 5414 | 4788 | 7676 | CDS product helicase-primase primase subunit     |           | 5390-5414 | 5:02:01                 |

|                                                        |      |      |      |                                              |           |          |
|--------------------------------------------------------|------|------|------|----------------------------------------------|-----------|----------|
| CCCGTGGCAGCCGCCGTCGACC                                 |      |      |      |                                              |           |          |
| 5485                                                   | 5503 | 4788 | 7676 | CDS product helicase-primase primase subunit | 5485-5503 | 4:01:01  |
| GGAGGTACGGGCCCATGGG                                    |      |      |      |                                              |           |          |
| 5661                                                   | 5696 | 4788 | 7676 | CDS product helicase-primase primase subunit | 5661-5696 | 8:05:02  |
| GGGACGGGGGCGCGGACGAGGGCGAGGCGCCGGG                     |      |      |      |                                              |           |          |
| 5691                                                   | 5729 | 4788 | 7676 | CDS product helicase-primase primase subunit | 5691-5729 | 8:05:02  |
| CCGGGGTCCCCGCCCGCGCCCCGATCCCGACCCGACC                  |      |      |      |                                              |           |          |
| 5766                                                   | 5798 | 4788 | 7676 | CDS product helicase-primase primase subunit | 5766-5798 | 6:03:01  |
| CCCGCGTCCCAGTCCGCCAGTCCTCGTCGCCC                       |      |      |      |                                              |           |          |
| 5836                                                   | 5857 | 4788 | 7676 | CDS product helicase-primase primase subunit | 5836-5857 | 4:01:01  |
| CCCAGGGCGCCTCCTCGAGGCC                                 |      |      |      |                                              |           |          |
| 5864                                                   | 5904 | 4788 | 7676 | CDS product helicase-primase primase subunit | 5864-5904 | 10:07:02 |
| GGAGGAGCCCGCGGAGGCGGACCCCGCGGCGGCGGAGGG                |      |      |      |                                              |           |          |
| 6197                                                   | 6251 | 4788 | 7676 | CDS product helicase-primase primase subunit | 6197-6251 | 9:06:02  |
| CCCCCAGGCGTCCCCGGCCAGCACCGGAAGGCCTGGCGCCGGTGCGCCAGCTCC |      |      |      |                                              |           |          |
| 6256                                                   | 6275 | 4788 | 7676 | CDS product helicase-primase primase subunit | 6256-6275 | 4:01:01  |
| GGTACACCGGCGCCGGGGG                                    |      |      |      |                                              |           |          |
| 6355                                                   | 6385 | 4788 | 7676 | CDS product helicase-primase primase subunit | 6355-6385 | 6:03:01  |
| GGCGGCGCAGGACGGCGCCGTCGGCGCCCGG                        |      |      |      |                                              |           |          |
| 6446                                                   | 6474 | 4788 | 7676 | CDS product helicase-primase primase subunit | 6446-6474 | 6:03:01  |
| GGCGGTACGCGGCGCGGAGGCCGCGG                             |      |      |      |                                              |           |          |
| 6529                                                   | 6554 | 4788 | 7676 | CDS product helicase-primase primase subunit | 6529-6554 | 5:02:01  |
| CCTCCACGTAGCCGGCGCCCATGGCC                             |      |      |      |                                              |           |          |

|                                                             |      |      |      |                                              |           |          |                         |
|-------------------------------------------------------------|------|------|------|----------------------------------------------|-----------|----------|-------------------------|
| 6542                                                        | 6563 | 4788 | 7676 | CDS product helicase-primase primase subunit | 6542-6563 | 4:01:01  |                         |
| GGCGCCCATGGCCGGGCGAGG                                       |      |      |      |                                              |           |          |                         |
| 6628                                                        | 6645 | 4788 | 7676 | CDS product helicase-primase primase subunit | 6628-6645 | 5:02:01  |                         |
| GGCGGAAGAAGGCGGCGG                                          |      |      |      |                                              |           |          |                         |
| 6781                                                        | 6813 | 4788 | 7676 | CDS product helicase-primase primase subunit | 6781-6813 | 5:02:01  |                         |
| GGTCGGGGAGCTTGAGGCTGCCCCGGTCGTGGG                           |      |      |      |                                              |           |          |                         |
| 6962                                                        | 6986 | 4788 | 7676 | CDS product helicase-primase primase subunit | 6962-6986 | 4:01:01  |                         |
| GGGGTCCAGGCCGCTGGGGTTGGGG                                   |      |      |      |                                              |           |          |                         |
| 7015                                                        | 7074 | 4788 | 7676 | CDS product helicase-primase primase subunit | 7015-7074 | 11:08:02 |                         |
| GGTCCTTGAGGGCCCGCAGGTCGTAGGCCGGCCGCGGGTGAAGAGGTGGAGGCGCGTGG |      |      |      |                                              |           |          |                         |
| 7147                                                        | 7161 | 4788 | 7676 | CDS product helicase-primase primase subunit | 7147-7161 | 4:01:01  | GGCGCCGAAGGCGG          |
| 7309                                                        | 7332 | 4788 | 7676 | CDS product helicase-primase primase subunit | 7309-7332 | 5:02:01  |                         |
| GGCCGTCGTGGAGGGCGAAGGTGG                                    |      |      |      |                                              |           |          |                         |
| 7333                                                        | 7349 | 4788 | 7676 | CDS product helicase-primase primase subunit | 7333-7349 | 4:01:01  |                         |
| CCGCCTCGTCCATGGCC                                           |      |      |      |                                              |           |          |                         |
| 7683                                                        | 7713 | 7663 | 8373 | CDS product tegument protein UL51            | 7683-7713 | 6:03:01  |                         |
| GGGTGGTGCGGGCGCCGCGCCGTGGGAGGG                              |      |      |      |                                              |           |          |                         |
| 7772                                                        | 7793 | 7663 | 8373 | CDS product tegument protein UL51            | 7772-7793 | 5:02:01  | CCTCCCCGCCCCGCTCGCCGCC  |
| 7796                                                        | 7818 | 7663 | 8373 | CDS product tegument protein UL51            | 7796-7818 | 4:01:01  | GGACGTGATGGCCTCGGCCGAGG |
| 7807                                                        | 7836 | 7663 | 8373 | CDS product tegument protein UL51            | 7807-7836 | 6:03:01  |                         |
| CCTCGGCCGAGGCCGCGCGCCGCTGGCCC                               |      |      |      |                                              |           |          |                         |
| 7858                                                        | 7910 | 7663 | 8373 | CDS product tegument protein UL51            | 7858-7910 | 9:06:02  |                         |
| CCTACCAGGCCTGCCAGCGCAACCTGGAGTGCCTGGCGGCCACGAGGCCTCC        |      |      |      |                                              |           |          |                         |

|                                                 |      |      |      |                                         |           |         |                             |
|-------------------------------------------------|------|------|------|-----------------------------------------|-----------|---------|-----------------------------|
| 7904                                            | 7950 | 7663 | 8373 | CDS product tegument protein UL51       | 7904-7950 | 7:04:01 |                             |
| GGCCTCCGGCGACGACGGCCTGGACGCCGTGGTCGCGGCGCACGCGG |      |      |      |                                         |           |         |                             |
| 8096                                            | 8142 | 7663 | 8373 | CDS product tegument protein UL51       | 8096-8142 | 9:06:02 |                             |
| GGCCGTCCTGGAGCGGACGCTGGGACTGGCCCGGCGGCGGAGCCGG  |      |      |      |                                         |           |         |                             |
| 8139                                            | 8165 | 7663 | 8373 | CDS product tegument protein UL51       | 8139-8165 | 6:03:01 | CCGGCGCCCGTCCGGGCCGCGCCCGCC |
| 8178                                            | 8200 | 7663 | 8373 | CDS product tegument protein UL51       | 8178-8200 | 5:02:01 | CCCGTCCCCGCCCAGCCCGCCCC     |
| 8209                                            | 8240 | 7663 | 8373 | CDS product tegument protein UL51       | 8209-8240 | 9:06:02 |                             |
| CCGCCGCCCGCCCGGCCCGCCCGCCCGCCC                  |      |      |      |                                         |           |         |                             |
| 8243                                            | 8268 | 7663 | 8373 | CDS product tegument protein UL51       | 8243-8268 | 7:04:01 | GGAGGCGGGGAAGACGAGGAGGGGG   |
| 8290                                            | 8318 | 7663 | 8373 | CDS product tegument protein UL51       | 8290-8318 | 6:03:01 |                             |
| CCCCGCTGCTGCCCCCGCGCCCCCGCC                     |      |      |      |                                         |           |         |                             |
| 8339                                            | 8358 | 7663 | 8373 | CDS product tegument protein UL51       | 8339-8358 | 5:02:01 | GGCCCGAGGCTGGCCGAGG         |
| 8620                                            | 8647 | 8527 | 9333 | CDS product deoxyuridine triphosphatase | 8620-8647 | 5:02:01 |                             |
| GGGGCGCGGGGTGGCGGGGAACGGGG                      |      |      |      |                                         |           |         |                             |
| 8649                                            | 8667 | 8527 | 9333 | CDS product deoxyuridine triphosphatase | 8649-8667 | 4:01:01 | CCGTCCCGTGATCCAGCCC         |
| 8738                                            | 8763 | 8527 | 9333 | CDS product deoxyuridine triphosphatase | 8738-8763 | 5:02:01 |                             |
| GGTTCTGGATCCGGAAGCGGCACGGG                      |      |      |      |                                         |           |         |                             |
| 8874                                            | 8894 | 8527 | 9333 | CDS product deoxyuridine triphosphatase | 8874-8894 | 4:01:01 | GGTCTCGGCGCCCCGGGGGG        |
| 9053                                            | 9089 | 8527 | 9333 | CDS product deoxyuridine triphosphatase | 9053-9089 | 6:03:01 |                             |
| CCTGCACCTCGCCGCAAAGCCCGCTCCACGATCCC             |      |      |      |                                         |           |         |                             |
| 9149                                            | 9171 | 8527 | 9333 | CDS product deoxyuridine triphosphatase | 9149-9171 | 4:01:01 | CCACCTTGAGGCCAGGGGAACC      |
| 9181                                            | 9225 | 8527 | 9333 | CDS product deoxyuridine triphosphatase | 9181-9225 | 9:06:02 |                             |
| CCCTCCGGCCCCGACTCCGGCACACCAGCGCCCTCCGTCC        |      |      |      |                                         |           |         |                             |

|                                                                                                                        |       |       |       |                                                   |             |          |                              |
|------------------------------------------------------------------------------------------------------------------------|-------|-------|-------|---------------------------------------------------|-------------|----------|------------------------------|
| 9329                                                                                                                   | 9356  | 9257  | 9553  | CDS product envelope glycoprotein N               | 9329-9356   | 5:02:01  | CCATCGTCTCCACCGAGGGGCCGCTGCC |
| 9395                                                                                                                   | 9408  | 9257  | 9553  | CDS product envelope glycoprotein N               | 9395-9408   | 4:01:01  | CCGCCTGCGCCGCC               |
| 9430                                                                                                                   | 9444  | 9257  | 9553  | CDS product envelope glycoprotein N               | 9430-9444   | 4:01:01  | CCCACGGCCGCCGCC              |
| 9609                                                                                                                   | 9634  | 9591  | 10340 | CDS product tegument protein VP22                 | 9609-9634   | 5:02:01  | CCCGGGTCGCCGCCGACGAGACCGCC   |
| 9646                                                                                                                   | 9718  | 9591  | 10340 | CDS product tegument protein VP22                 | 9646-9718   | 14:11:03 |                              |
| CCGCCGCGCCGAGCGCCTCTCGCACCCGGACCAACGCCCCGGCCGCCGACCCCCAGACCCCCTCGGCC                                                   |       |       |       |                                                   |             |          |                              |
| 9776                                                                                                                   | 9801  | 9591  | 10340 | CDS product tegument protein VP22                 | 9776-9801   | 4:01:01  | GGCTACTACGGCTACGATGGCTACGG   |
| 9804                                                                                                                   | 9826  | 9591  | 10340 | CDS product tegument protein VP22                 | 9804-9826   | 6:03:01  | CCTCCCGCGCCCCCGCGCCGCC       |
| 9836                                                                                                                   | 9997  | 9591  | 10340 | CDS product tegument protein VP22                 | 9836-9997   | 34:31:08 |                              |
| CCCGCGGCCGCTCGCGGGCCTCGACCGGGCCAAGAGCGCCTCGGCCGCCAAGACCCCCGCGTCCGCGGCCAAGACCGCCGCTCGGCCCGCGCGCCCCGGCCGCCACCACCACCACCAC |       |       |       |                                                   |             |          |                              |
| CACCGCCGCCGCGGAACCGGCCGCCCGCGCGGCC                                                                                     |       |       |       |                                                   |             |          |                              |
| 10036                                                                                                                  | 10051 | 9591  | 10340 | CDS product tegument protein VP22                 | 10036-10051 | 4:01:01  | CCGCCGCCGGCTCGCC             |
| 10129                                                                                                                  | 10151 | 9591  | 10340 | CDS product tegument protein VP22                 | 10129-10151 | 4:01:01  | GGCCGTGGGACGCGTGGCCGAGG      |
| 10146                                                                                                                  | 10178 | 9591  | 10340 | CDS product tegument protein VP22                 | 10146-10178 | 7:04:01  |                              |
| CCGAGGCCACGCCCCGCGCGCCGCGAGTCCC                                                                                        |       |       |       |                                                   |             |          |                              |
| 10438                                                                                                                  | 10468 | 10404 | 11645 | CDS product transactivating tegument protein VP16 | 10438-10468 | 6:03:01  |                              |
| GGCCCTGCTGGGGGCGCGCCCCGGCCGG                                                                                           |       |       |       |                                                   |             |          |                              |
| 10458                                                                                                                  | 10488 | 10404 | 11645 | CDS product transactivating tegument protein VP16 | 10458-10488 | 6:03:01  |                              |
| CCCCGGGCGCGCCCGCCGTGGTGGCCGTCCC                                                                                        |       |       |       |                                                   |             |          |                              |
| 10549                                                                                                                  | 10589 | 10404 | 11645 | CDS product transactivating tegument protein VP16 | 10549-10589 | 6:03:01  |                              |
| GGGCCCCGCGCTGCTGGGCGCCATGGAGCGCTGGAACGAGG                                                                              |       |       |       |                                                   |             |          |                              |
| 10648                                                                                                                  | 10694 | 10404 | 11645 | CDS product transactivating tegument protein VP16 | 10648-10694 | 9:06:02  |                              |
| GGCCTCCGCGACGAGGTGGCGGCCAGGTCCGGGCGCCGACGGCGG                                                                          |       |       |       |                                                   |             |          |                              |

|                                                                 |       |       |       |                                                   |                                    |
|-----------------------------------------------------------------|-------|-------|-------|---------------------------------------------------|------------------------------------|
| 10711                                                           | 10727 | 10404 | 11645 | CDS product transactivating tegument protein VP16 | 10711-10727 4:01:01                |
| GGGGGTGCCCCGGGCGG                                               |       |       |       |                                                   |                                    |
| 10730                                                           | 10750 | 10404 | 11645 | CDS product transactivating tegument protein VP16 | 10730-10750 4:01:01                |
| CCCATGCCGCGAGTCCCGGCC                                           |       |       |       |                                                   |                                    |
| 10747                                                           | 10760 | 10404 | 11645 | CDS product transactivating tegument protein VP16 | 10747-10760 4:01:01                |
| GGCCGTGGAGGAGG                                                  |       |       |       |                                                   |                                    |
| 11020                                                           | 11039 | 10404 | 11645 | CDS product transactivating tegument protein VP16 | 11020-11039 5:02:01                |
| GGACCAGGTGGTGGCCCAGG                                            |       |       |       |                                                   |                                    |
| 11169                                                           | 11183 | 10404 | 11645 | CDS product transactivating tegument protein VP16 | 11169-11183 4:01:01                |
| CCGTCAACCACCGCC                                                 |       |       |       |                                                   |                                    |
| 11255                                                           | 11303 | 10404 | 11645 | CDS product transactivating tegument protein VP16 | 11255-11303 9:06:02                |
| CCGCCGTTCTCCGCCGCGCTGCCGCGCGCCCGGCTACCTCTCGCACC                 |       |       |       |                                                   |                                    |
| 11359                                                           | 11380 | 10404 | 11645 | CDS product transactivating tegument protein VP16 | 11359-11380 5:02:01                |
| CCGCCCGCCCTCGCCCGTGGCC                                          |       |       |       |                                                   |                                    |
| 11394                                                           | 11457 | 10404 | 11645 | CDS product transactivating tegument protein VP16 | 11394-11457 11:08:02               |
| CCGCGGAGGCCCTGCTGCCGCCCCGTCGCCCTCGGCCGTGCTGCCCTGCGACCCGACGCCGCC |       |       |       |                                                   |                                    |
| 11506                                                           | 11520 | 10404 | 11645 | CDS product transactivating tegument protein VP16 | 11506-11520 4:01:01                |
| GGCCGAGGAGGATGG                                                 |       |       |       |                                                   |                                    |
| 11533                                                           | 11552 | 10404 | 11645 | CDS product transactivating tegument protein VP16 | 11533-11552 4:01:01                |
| GGCGGCGCCCGCGGCCGCGG                                            |       |       |       |                                                   |                                    |
| 11571                                                           | 11612 | 10404 | 11645 | CDS product transactivating tegument protein VP16 | 11571-11612 11:08:02               |
| CCTCGCCCGGGCCCGCCACCCCGCCTACCACCTCATCCCCC                       |       |       |       |                                                   |                                    |
| 11798                                                           | 11811 | 11746 | 13998 | CDS product tegument protein VP13/14              | 11798-11811 4:01:01 CCAGCCGTTCCCCC |

|                                                                 |       |       |       |                                      |                      |                         |
|-----------------------------------------------------------------|-------|-------|-------|--------------------------------------|----------------------|-------------------------|
| 11849                                                           | 11868 | 11746 | 13998 | CDS product tegument protein VP13/14 | 11849-11868 4:01:01  | GGGCGAGGTGCGGCGCCCGG    |
| 11864                                                           | 11885 | 11746 | 13998 | CDS product tegument protein VP13/14 | 11864-11885 5:02:01  | CCCGGACTTCCGCCCGCCGCC   |
| 11933                                                           | 12000 | 11746 | 13998 | CDS product tegument protein VP13/14 | 11933-12000 18:15:04 |                         |
| GGAGGAGGAAGAGGGGGGGCGGAGGAGGAGGACGAGCGGGGGCCGGCGGGGGTGAGGAGGGGG |       |       |       |                                      |                      |                         |
| 12009                                                           | 12069 | 11746 | 13998 | CDS product tegument protein VP13/14 | 12009-12069 13:10:03 |                         |
| GGGGACGAGGAGGAGGAGGAGGAGGAGGAGGAGCGAGGGGGCGCGTGGTCCGACGGGG      |       |       |       |                                      |                      |                         |
| 12100                                                           | 12144 | 11746 | 13998 | CDS product tegument protein VP13/14 | 12100-12144 9:06:02  |                         |
| GGGACGCGGAAGAGGAGGAGGACGAGGATGGGGACGAGGATGGGG                   |       |       |       |                                      |                      |                         |
| 12171                                                           | 12195 | 11746 | 13998 | CDS product tegument protein VP13/14 | 12171-12195 4:01:01  |                         |
| GGCTATGACGGCCGCGGCGCCCGG                                        |       |       |       |                                      |                      |                         |
| 12182                                                           | 12224 | 11746 | 13998 | CDS product tegument protein VP13/14 | 12182-12224 9:06:02  |                         |
| CCGCGGCGCCGCGGCTCCCGCGCCGCGGCGGGCCCCCGCC                        |       |       |       |                                      |                      |                         |
| 12255                                                           | 12274 | 11746 | 13998 | CDS product tegument protein VP13/14 | 12255-12274 4:01:01  | GGCATGGAGACGGCCTCCGG    |
| 12336                                                           | 12409 | 11746 | 13998 | CDS product tegument protein VP13/14 | 12336-12409 16:13:04 |                         |
| CCCCGGCGGCGGGGTACCGGCCCCCGCGCCGCGGACCCCCGCGCCCCCGCGGGCCCGGCCACC |       |       |       |                                      |                      |                         |
| 12339                                                           | 12356 | 11746 | 13998 | CDS product tegument protein VP13/14 | 12339-12356 4:01:01  | GGGCGGCCGGGGTACCGG      |
| 12424                                                           | 12447 | 11746 | 13998 | CDS product tegument protein VP13/14 | 12424-12447 8:05:02  | CCGCCGCCTCCACCGCCGCCGCC |
| 12456                                                           | 12470 | 11746 | 13998 | CDS product tegument protein VP13/14 | 12456-12470 4:01:01  | CCCGCCCGCGCCGCC         |
| 12543                                                           | 12568 | 11746 | 13998 | CDS product tegument protein VP13/14 | 12543-12568 5:02:01  |                         |
| CCCGACGGGACCTTCCTGGCCATGCC                                      |       |       |       |                                      |                      |                         |
| 12587                                                           | 12649 | 11746 | 13998 | CDS product tegument protein VP13/14 | 12587-12649 11:08:02 |                         |
| CCGCGAGCCGCGGGCCCCCGGCGCCCGTCGGGCCCCGGACATCCTGCGCCGCGCCCC       |       |       |       |                                      |                      |                         |
| 12674                                                           | 12687 | 11746 | 13998 | CDS product tegument protein VP13/14 | 12674-12687 4:01:01  | GGCGGCCTCGGCGG          |



|                                        |       |       |       |                                      |
|----------------------------------------|-------|-------|-------|--------------------------------------|
| 12707                                  | 12726 | 11746 | 13998 | CDS product tegument protein VP13/14 |
| 12729                                  | 12744 | 11746 | 13998 | CDS product tegument protein VP13/14 |
| 12847                                  | 12866 | 11746 | 13998 | CDS product tegument protein VP13/14 |
| 13038                                  | 13076 | 11746 | 13998 | CDS product tegument protein VP13/14 |
| CCCGCGGCTCGGGCCGCGCGCCGGCCTCTCCGCGCC   |       |       |       |                                      |
| 13083                                  | 13104 | 11746 | 13998 | CDS product tegument protein VP13/14 |
| 13150                                  | 13163 | 11746 | 13998 | CDS product tegument protein VP13/14 |
| 13436                                  | 13446 | 11746 | 13998 | CDS product tegument protein VP13/14 |
| 13456                                  | 13475 | 11746 | 13998 | CDS product tegument protein VP13/14 |
| 13620                                  | 13647 | 11746 | 13998 | CDS product tegument protein VP13/14 |
| GGCGCCGCGGTCCACGGCGCCGGACGG            |       |       |       |                                      |
| 13771                                  | 13789 | 11746 | 13998 | CDS product tegument protein VP13/14 |
| 13824                                  | 13845 | 11746 | 13998 | CDS product tegument protein VP13/14 |
| 13859                                  | 13884 | 11746 | 13998 | CDS product tegument protein VP13/14 |
| CCCGCCACGGCCGTGCGCCCCGCC               |       |       |       |                                      |
| 13904                                  | 13930 | 11746 | 13998 | CDS product tegument protein VP13/14 |
| CCTCGCCGAATACGCCGCGGCCACCC             |       |       |       |                                      |
| 14108                                  | 14145 | 14017 | 16098 | CDS product tegument protein VP11/12 |
| GGCGGCCCCCGGGAGGTGCTGACGGCGGCCGTGGCGG  |       |       |       |                                      |
| 14315                                  | 14352 | 14017 | 16098 | CDS product tegument protein VP11/12 |
| GGGCATCACGGCGGACGTGGCCTGGCGCGCGGTGCTGG |       |       |       |                                      |
| 14375                                  | 14403 | 14017 | 16098 | CDS product tegument protein VP11/12 |
| GGCCAGCTCGGGCGTGAGGTGCGCTCGG           |       |       |       |                                      |

|             |         |                        |
|-------------|---------|------------------------|
| 12707-12726 | 4:01:01 | GGACGCCTGGGAGGCGCTGG   |
| 12729-12744 | 4:01:01 | CCGCTGCACCACCTCC       |
| 12847-12866 | 4:01:01 | CCATCGCCCTGCACCACGCC   |
| 13038-13076 | 7:04:01 |                        |
| 13083-13104 | 4:01:01 | GGTCCCTGGCCTACTGGCCGG  |
| 13150-13163 | 4:01:01 | CCTTCCACCTGGCC         |
| 13436-13446 | 4:01:01 | GGTGGCGGCGG            |
| 13456-13475 | 4:01:01 | CCACGGGCCTGGGCCAGGCC   |
| 13620-13647 | 6:03:01 |                        |
| 13771-13789 | 4:01:01 | GGTTGACGGCGCCCCGGG     |
| 13824-13845 | 4:01:01 | CCCGCGCTGCCCTCCGAGGACC |
| 13859-13884 | 5:02:01 |                        |
| 13904-13930 | 5:02:01 |                        |
| 14108-14145 | 8:05:02 |                        |
| 14315-14352 | 7:04:01 |                        |
| 14375-14403 | 5:02:01 |                        |

14509 14543 14017 16098 CDS product tegument protein VP11/12  
 CCACGCGCGCCGCTCGCCGAGGCGACCGAGGCC  
 14531 14552 14017 16098 CDS product tegument protein VP11/12  
 14570 14598 14017 16098 CDS product tegument protein VP11/12  
 CCCGCTCGACCCCATGGTCTCCAGCCCCC  
 14653 14676 14017 16098 CDS product tegument protein VP11/12  
 14771 14795 14017 16098 CDS product tegument protein VP11/12  
 CCGCGCCGGCGGGCCCCCGCTGGCC  
 14792 14811 14017 16098 CDS product tegument protein VP11/12  
 14851 14888 14017 16098 CDS product tegument protein VP11/12  
 CCCTGGAGATCCTCGGCGCCACGTGGGCCGAGACGCC  
 14890 14916 14017 16098 CDS product tegument protein VP11/12  
 GGAAGAGCGGCGTGTGCGGCCTCACGG  
 14909 14948 14017 16098 CDS product tegument protein VP11/12  
 CCTCACGGCCGCGTCGTGGCCGCGTGGACCTCGTGACC  
 15062 15075 14017 16098 CDS product tegument protein VP11/12  
 15256 15286 14017 16098 CDS product tegument protein VP11/12  
 CCCCCGCGAGCCGCGCTGCCGCGCTGCC  
 15303 15324 14017 16098 CDS product tegument protein VP11/12  
 15381 15421 14017 16098 CDS product tegument protein VP11/12  
 CCCGTGCCGTCTCGCCGCCCCGCTCCCCGAGGGGCCCCC  
 15440 15461 14017 16098 CDS product tegument protein VP11/12  
 15464 15491 14017 16098 CDS product tegument protein VP11/12

14509-14543 5:02:01

14531-14552 4:01:01 GGCGACCGAGGCCGTGGAGCGG

14570-14598 5:02:01

14653-14676 4:01:01 GGCTGCTGTGGATGATGGACACGG

14771-14795 5:02:01

14792-14811 4:01:01 GGCCTCGGGCTCGGGCGAGG

14851-14888 5:02:01

14890-14916 4:01:01

14909-14948 7:04:01

15062-15075 4:01:01 CCGCTTCCACCACC

15256-15286 7:04:01

15303-15324 5:02:01 CCGTCGCCGCCGCCCCGCGACC

15381-15421 8:05:02

15440-15461 7:04:01 GGAGGTGGACGGCGCGGGCGG

15464-15491 6:03:01

|                                                 |       |       |       |                                      |                                                |
|-------------------------------------------------|-------|-------|-------|--------------------------------------|------------------------------------------------|
| CCCCCTCCGGCGCAGCCGCGACGCCGCC                    |       |       |       |                                      |                                                |
| 15503                                           | 15523 | 14017 | 16098 | CDS product tegument protein VP11/12 | 15503-15523 4:01:01 CCGCAAGGACCTCGCGCCCCC      |
| 15530                                           | 15550 | 14017 | 16098 | CDS product tegument protein VP11/12 | 15530-15550 7:04:01 GGCGGCGGGGAGGGGAGGG        |
| 15560                                           | 15581 | 14017 | 16098 | CDS product tegument protein VP11/12 | 15560-15581 5:02:01 GGAAGAGGAGGAGGATGACCGG     |
| 15701                                           | 15714 | 14017 | 16098 | CDS product tegument protein VP11/12 | 15701-15714 5:02:01 GGGGGTGGAGGAGG             |
| 15738                                           | 15766 | 14017 | 16098 | CDS product tegument protein VP11/12 | 15738-15766 6:03:01                            |
| GGGGACGGCGAACGAGGCGCCGGCGGCGG                   |       |       |       |                                      |                                                |
| 15931                                           | 15963 | 14017 | 16098 | CDS product tegument protein VP11/12 | 15931-15963 8:05:02                            |
| CCGCGGCCCCCGCCACCCCGCGTCCCCGCC                  |       |       |       |                                      |                                                |
| 15973                                           | 16008 | 14017 | 16098 | CDS product tegument protein VP11/12 | 15973-16008 7:04:01                            |
| CCGACCACGTGTACCAGCACCCCGCCCGGACCC               |       |       |       |                                      |                                                |
| 16022                                           | 16043 | 14017 | 16098 | CDS product tegument protein VP11/12 | 16022-16043 5:02:01 CCTGTACCAGCACCCCGACCC      |
| 16052                                           | 16065 | 14017 | 16098 | CDS product tegument protein VP11/12 | 16052-16065 4:01:01 CCTACCGGCCACC              |
| 16882                                           | 16908 | 16854 | 19595 | CDS product envelope glycoprotein B  | 16882-16908 5:02:01 GGCGCTGGTAGTGCCGGCGGCGGTGG |
| 17017                                           | 17053 | 16854 | 19595 | CDS product envelope glycoprotein B  | 17017-17053 6:03:01                            |
| CCCGGGCCTGGTCCAGCTTGGCCTCGTCCACGTCGCC           |       |       |       |                                      |                                                |
| 17093                                           | 17126 | 16854 | 19595 | CDS product envelope glycoprotein B  | 17093-17126 5:02:01                            |
| GGGGTACAGGGCCTTCATGGGGTTGCGGCGCAGG              |       |       |       |                                      |                                                |
| 17138                                           | 17185 | 16854 | 19595 | CDS product envelope glycoprotein B  | 17138-17185 8:05:02                            |
| CCGGTAGGCCAGGAAGGCCGCGACCAGGCCGCCAGCACCAGCAGCCC |       |       |       |                                      |                                                |
| 17140                                           | 17154 | 16854 | 19595 | CDS product envelope glycoprotein B  | 17140-17154 4:01:01 GGTAGGCCAGGAAGG            |
| 17204                                           | 17220 | 16854 | 19595 | CDS product envelope glycoprotein B  | 17204-17220 4:01:01 GGGGTTGGACAGGAAGG          |
| 17224                                           | 17240 | 16854 | 19595 | CDS product envelope glycoprotein B  | 17224-17240 4:01:01 CCATGCCGCCGACGGCC          |

|                                                 |       |       |       |                                     |                     |                              |
|-------------------------------------------------|-------|-------|-------|-------------------------------------|---------------------|------------------------------|
| 17251                                           | 17278 | 16854 | 19595 | CDS product envelope glycoprotein B | 17251-17278 6:03:01 | CCCCCGTGGCACCCAGGACCACCTTGCC |
| 17608                                           | 17626 | 16854 | 19595 | CDS product envelope glycoprotein B | 17608-17626 4:01:01 | GGTGGTTGCCGGTGCAGG           |
| 17778                                           | 17799 | 16854 | 19595 | CDS product envelope glycoprotein B | 17778-17799 5:02:01 | CCGCCGCGCACCTCCACGCACC       |
| 17855                                           | 17882 | 16854 | 19595 | CDS product envelope glycoprotein B | 17855-17882 5:02:01 | GGCCGTGGCCACGGCGCTGGGGTTCAGG |
| 18053                                           | 18067 | 16854 | 19595 | CDS product envelope glycoprotein B | 18053-18067 4:01:01 | GGCCGGCGGCTCGGG              |
| 18078                                           | 18125 | 16854 | 19595 | CDS product envelope glycoprotein B | 18078-18125 9:06:02 |                              |
| GGGCCGGGGAGCGCCGGGCCCCGACGGGCGGCCGCGGGGCCGCGGGG |       |       |       |                                     |                     |                              |
| 18109                                           | 18145 | 16854 | 19595 | CDS product envelope glycoprotein B | 18109-18145 5:02:01 |                              |
| CCGCGGGGGCCGCGGGGCCACGACGCCGGCGAGGCC            |       |       |       |                                     |                     |                              |
| 18208                                           | 18223 | 16854 | 19595 | CDS product envelope glycoprotein B | 18208-18223 4:01:01 | CCACCACGAAGCCCCC             |
| 18238                                           | 18257 | 16854 | 19595 | CDS product envelope glycoprotein B | 18238-18257 4:01:01 | CCTCGGGCCTGTCGCCGGCC         |
| 18286                                           | 18323 | 16854 | 19595 | CDS product envelope glycoprotein B | 18286-18323 6:03:01 |                              |
| GGTAGATGGCGTCGATGGCCTCCGAGGCCTCGCGGAGG          |       |       |       |                                     |                     |                              |
| 18445                                           | 18467 | 16854 | 19595 | CDS product envelope glycoprotein B | 18445-18467 4:01:01 | CCTCGGCCTCGCGCCACTTGCC       |
| 18496                                           | 18512 | 16854 | 19595 | CDS product envelope glycoprotein B | 18496-18512 4:01:01 | CCCAGTCCCAGGCCACC            |
| 18554                                           | 18566 | 16854 | 19595 | CDS product envelope glycoprotein B | 18554-18566 4:01:01 | GGAGGCGCGGAGG                |
| 18695                                           | 18726 | 16854 | 19595 | CDS product envelope glycoprotein B | 18695-18726 5:02:01 |                              |
| GGACAGGGCGAAGGAGTCGTAGGGGTACACGG                |       |       |       |                                     |                     |                              |
| 18733                                           | 18743 | 16854 | 19595 | CDS product envelope glycoprotein B | 18733-18743 4:01:01 | CCTCCACCTCC                  |
| 18800                                           | 18819 | 16854 | 19595 | CDS product envelope glycoprotein B | 18800-18819 4:01:01 | GGTGTAGGTGTCGTTGGTGG         |
| 19183                                           | 19204 | 16854 | 19595 | CDS product envelope glycoprotein B | 19183-19204 5:02:01 | CCAGCCGCACCACCGTGGAGCC       |
| 19199                                           | 19217 | 16854 | 19595 | CDS product envelope glycoprotein B | 19199-19217 5:02:01 | GGAGCCGGACGGCGGCGGG          |
| 19261                                           | 19291 | 16854 | 19595 | CDS product envelope glycoprotein B | 19261-19291 5:02:01 |                              |

|                                                                |       |       |       |                                               |                                             |
|----------------------------------------------------------------|-------|-------|-------|-----------------------------------------------|---------------------------------------------|
| CCGTCCGCGCGTCCAGGTGCGCGTACTCGCC                                |       |       |       |                                               |                                             |
| 19295                                                          | 19317 | 16854 | 19595 | CDS product envelope glycoprotein B           | 19295-19317 5:02:01 GGGGGCCTCCGAGGGCCGGGGG  |
| 19382                                                          | 19404 | 16854 | 19595 | CDS product envelope glycoprotein B           | 19382-19404 5:02:01 GGGCGTCGGCGAGGCCGAGGCGG |
| 19521                                                          | 19585 | 19466 | 21640 | CDS product DNA packaging terminase subunit 2 | 19521-19585 13:10:03                        |
| CCGAGGCCAGCACCGCCGTGGTGCCCGGGCCGATGCCCCGGGGCCCGCCAAAGACCGCCACC |       |       |       |                                               |                                             |
| 19737                                                          | 19768 | 19466 | 21640 | CDS product DNA packaging terminase subunit 2 | 19737-19768 6:03:01                         |
| GGGTGGCGGTTACGCCGGCCGTCTGGAAGCGG                               |       |       |       |                                               |                                             |
| 19836                                                          | 19849 | 19466 | 21640 | CDS product DNA packaging terminase subunit 2 | 19836-19849 4:01:01 GGTGCGGCAGGAGG          |
| 19885                                                          | 19901 | 19466 | 21640 | CDS product DNA packaging terminase subunit 2 | 19885-19901 4:01:01                         |
| GGGGGGCTGGGCGAAGG                                              |       |       |       |                                               |                                             |
| 19960                                                          | 19990 | 19466 | 21640 | CDS product DNA packaging terminase subunit 2 | 19960-19990 6:03:01                         |
| GGCCGGAAGGAGCGCGCGTCCACGGGGTGG                                 |       |       |       |                                               |                                             |
| 20104                                                          | 20119 | 19466 | 21640 | CDS product DNA packaging terminase subunit 2 | 20104-20119 4:01:01 CCCGGCGGCCACCGCC        |
| 20205                                                          | 20225 | 19466 | 21640 | CDS product DNA packaging terminase subunit 2 | 20205-20225 4:01:01                         |
| CCAGGCTCGCCGCCGAGCGCC                                          |       |       |       |                                               |                                             |
| 20277                                                          | 20314 | 19466 | 21640 | CDS product DNA packaging terminase subunit 2 | 20277-20314 7:04:01                         |
| CCGCGGCCCGCAGGTCCGCCACGCCACGGCGTCCGCC                          |       |       |       |                                               |                                             |
| 20315                                                          | 20331 | 19466 | 21640 | CDS product DNA packaging terminase subunit 2 | 20315-20331 4:01:01                         |
| GGCGGGGCGCGCCGGG                                               |       |       |       |                                               |                                             |
| 20345                                                          | 20388 | 19466 | 21640 | CDS product DNA packaging terminase subunit 2 | 20345-20388 9:06:02                         |
| CCGACGCCCCCGTCGCCGGCGTCCGCGCCCCCGCGGCGCCGCC                    |       |       |       |                                               |                                             |
| 20418                                                          | 20455 | 19466 | 21640 | CDS product DNA packaging terminase subunit 2 | 20418-20455 7:04:01                         |
| GGAGGCGCTCGAGGGCGTCGCGGTTGGCCCCGTCCGGG                         |       |       |       |                                               |                                             |

|                                                                                 |       |       |       |                                                 |                      |
|---------------------------------------------------------------------------------|-------|-------|-------|-------------------------------------------------|----------------------|
| 20473                                                                           | 20491 | 19466 | 21640 | CDS product DNA packaging terminase subunit 2   | 20473-20491 4:01:01  |
| GGGCGTGGACATGTGGTGG                                                             |       |       |       |                                                 |                      |
| 20637                                                                           | 20656 | 19466 | 21640 | CDS product DNA packaging terminase subunit 2   | 20637-20656 4:01:01  |
| CCACGGCCGCGCGCGCACC                                                             |       |       |       |                                                 |                      |
| 20820                                                                           | 20902 | 19466 | 21640 | CDS product DNA packaging terminase subunit 2   | 20820-20902 16:13:04 |
| CCGCGCGCCGGCGCGCCGTCTCGCCCGGTCCCGGCCCTCGGCGCCCGCCGCGCCGTGGACGCCCTCCGCCTCCCGGGCC |       |       |       |                                                 |                      |
| 20898                                                                           | 20921 | 19466 | 21640 | CDS product DNA packaging terminase subunit 2   | 20898-20921 5:02:01  |
| GGGCCTCGGCGGCGTCCACGGCGG                                                        |       |       |       |                                                 |                      |
| 20988                                                                           | 21023 | 19466 | 21640 | CDS product DNA packaging terminase subunit 2   | 20988-21023 6:03:01  |
| CCACGTCCTCGGGGTCCACGCGCACCGCCAGCTGCC                                            |       |       |       |                                                 |                      |
| 21141                                                                           | 21165 | 19466 | 21640 | CDS product DNA packaging terminase subunit 2   | 21141-21165 5:02:01  |
| CCGGCGGCACCACGAGCCCGCCGCC                                                       |       |       |       |                                                 |                      |
| 21189                                                                           | 21208 | 19466 | 21640 | CDS product DNA packaging terminase subunit 2   | 21189-21208 4:01:01  |
| CCACGGCCGACAGGTCCACC                                                            |       |       |       |                                                 |                      |
| 21252                                                                           | 21271 | 19466 | 21640 | CDS product DNA packaging terminase subunit 2   | 21252-21271 4:01:01  |
| GGTTCTCGGCGTCGTGGAGG                                                            |       |       |       |                                                 |                      |
| 21282                                                                           | 21300 | 19466 | 21640 | CDS product DNA packaging terminase subunit 2   | 21282-21300 4:01:01  |
| CCGTCTCCACGCGCCCGCC                                                             |       |       |       |                                                 |                      |
| 21866                                                                           | 21895 | 21788 | 25315 | CDS product single-stranded DNA-binding protein | 21866-21895 5:02:01  |
| CCCCCAGCTCCGCGGCACCAGCGAGGCC                                                    |       |       |       |                                                 |                      |
| 21904                                                                           | 21936 | 21788 | 25315 | CDS product single-stranded DNA-binding protein | 21904-21936 5:02:01  |
| CCCCGCGACGTCCCCGCGCGCCGAGGCCCC                                                  |       |       |       |                                                 |                      |
| 21954                                                                           | 21982 | 21788 | 25315 | CDS product single-stranded DNA-binding protein | 21954-21982 6:03:01  |

|                                       |       |       |       |                                                 |                     |
|---------------------------------------|-------|-------|-------|-------------------------------------------------|---------------------|
| CCTCGCCGCCGTCCGCGCCCGTCTGGCCC         |       |       |       |                                                 |                     |
| 22008                                 | 22029 | 21788 | 25315 | CDS product single-stranded DNA-binding protein | 22008-22029 5:02:01 |
| CCGCCTCCACGCTCCAGCGCCC                |       |       |       |                                                 |                     |
| 22059                                 | 22075 | 21788 | 25315 | CDS product single-stranded DNA-binding protein | 22059-22075 4:01:01 |
| CCGCCAGCGGGCCGCC                      |       |       |       |                                                 |                     |
| 22167                                 | 22195 | 21788 | 25315 | CDS product single-stranded DNA-binding protein | 22167-22195 5:02:01 |
| CCGTCTGCACCAGCGGCCCGCCGTCGGCC         |       |       |       |                                                 |                     |
| 22237                                 | 22252 | 21788 | 25315 | CDS product single-stranded DNA-binding protein | 22237-22252 4:01:01 |
| 22340                                 | 22369 | 21788 | 25315 | CDS product single-stranded DNA-binding protein | 22340-22369 6:03:01 |
| CCGCCGTTGAGCCCGCTCCAGTTCCCGCC         |       |       |       |                                                 |                     |
| 22415                                 | 22432 | 21788 | 25315 | CDS product single-stranded DNA-binding protein | 22415-22432 4:01:01 |
| CCCAGGCCCAGCACCACC                    |       |       |       |                                                 |                     |
| 22436                                 | 22472 | 21788 | 25315 | CDS product single-stranded DNA-binding protein | 22436-22472 7:04:01 |
| GGGCGCGAGGCCATGACGGAGCGGAGCAGGTGGCTGG |       |       |       |                                                 |                     |
| 22536                                 | 22555 | 21788 | 25315 | CDS product single-stranded DNA-binding protein | 22536-22555 4:01:01 |
| CCGCGTCGGCCGCGTCCGCC                  |       |       |       |                                                 |                     |
| 22573                                 | 22600 | 21788 | 25315 | CDS product single-stranded DNA-binding protein | 22573-22600 5:02:01 |
| GGCCATGACGGCGGCCGGGTCCCGCGG           |       |       |       |                                                 |                     |
| 22668                                 | 22694 | 21788 | 25315 | CDS product single-stranded DNA-binding protein | 22668-22694 5:02:01 |
| GGATCAGGTTGGCCAGGTAGAACTGGG           |       |       |       |                                                 |                     |
| 23237                                 | 23254 | 21788 | 25315 | CDS product single-stranded DNA-binding protein | 23237-23254 4:01:01 |
| GGCTGGAAGTGGTTGCGG                    |       |       |       |                                                 |                     |
| 23295                                 | 23314 | 21788 | 25315 | CDS product single-stranded DNA-binding protein | 23295-23314 4:01:01 |

|                                |       |       |       |                                                 |                     |
|--------------------------------|-------|-------|-------|-------------------------------------------------|---------------------|
| GGCACTGGCTCAGGGCCAGG           |       |       |       |                                                 |                     |
| 23310                          | 23329 | 21788 | 25315 | CDS product single-stranded DNA-binding protein | 23310-23329 4:01:01 |
| CCAGGTCCTGCAGCACCGCC           |       |       |       |                                                 |                     |
| 23397                          | 23414 | 21788 | 25315 | CDS product single-stranded DNA-binding protein | 23397-23414 4:01:01 |
| GGGACATGGTGTGGTTGG             |       |       |       |                                                 |                     |
| 23478                          | 23494 | 21788 | 25315 | CDS product single-stranded DNA-binding protein | 23478-23494 4:01:01 |
| CCGCCGCTGCTCGACC               |       |       |       |                                                 |                     |
| 23564                          | 23590 | 21788 | 25315 | CDS product single-stranded DNA-binding protein | 23564-23590 6:03:01 |
| CCGGCCACGTCCGCCAGCAGCCGGTCC    |       |       |       |                                                 |                     |
| 23586                          | 23602 | 21788 | 25315 | CDS product single-stranded DNA-binding protein | 23586-23602 4:01:01 |
| GGTCCACGGCGGCGCGG              |       |       |       |                                                 |                     |
| 23757                          | 23783 | 21788 | 25315 | CDS product single-stranded DNA-binding protein | 23757-23783 6:03:01 |
| GGGAGCGGTGGCGCAGGCGGTGCAGGG    |       |       |       |                                                 |                     |
| 23797                          | 23815 | 21788 | 25315 | CDS product single-stranded DNA-binding protein | 23797-23815 4:01:01 |
| GGCGGGGCGCGAGGCGCGG            |       |       |       |                                                 |                     |
| 23830                          | 23855 | 21788 | 25315 | CDS product single-stranded DNA-binding protein | 23830-23855 4:01:01 |
| GGGGACCTCGGCGTCGAGGCTGCCGG     |       |       |       |                                                 |                     |
| 23957                          | 23980 | 21788 | 25315 | CDS product single-stranded DNA-binding protein | 23957-23980 4:01:01 |
| CCGCACGCCATCACCAGGTGGTCC       |       |       |       |                                                 |                     |
| 23994                          | 24023 | 21788 | 25315 | CDS product single-stranded DNA-binding protein | 23994-24023 4:01:01 |
| GGTTGCCCCGGGCGGTCGCGGGCTGCGAGG |       |       |       |                                                 |                     |
| 24062                          | 24081 | 21788 | 25315 | CDS product single-stranded DNA-binding protein | 24062-24081 4:01:01 |
| GGGTTCCCGGCCAGGTAGGG           |       |       |       |                                                 |                     |



|                                       |       |       |       |                                                 |                                      |
|---------------------------------------|-------|-------|-------|-------------------------------------------------|--------------------------------------|
| 24146                                 | 24163 | 21788 | 25315 | CDS product single-stranded DNA-binding protein | 24146-24163 4:01:01                  |
| CCCGCGTCGTCCACCTCC                    |       |       |       |                                                 |                                      |
| 24195                                 | 24217 | 21788 | 25315 | CDS product single-stranded DNA-binding protein | 24195-24217 5:02:01                  |
| CCAGCGCCCCACGAGGCCGGCC                |       |       |       |                                                 |                                      |
| 24271                                 | 24284 | 21788 | 25315 | CDS product single-stranded DNA-binding protein | 24271-24284 4:01:01 GGAGGCGGCCGCGG   |
| 24279                                 | 24307 | 21788 | 25315 | CDS product single-stranded DNA-binding protein | 24279-24307 6:03:01                  |
| CCGCGGCGCCGCGTCCTTGGCGCCCGCC          |       |       |       |                                                 |                                      |
| 24420                                 | 24440 | 21788 | 25315 | CDS product single-stranded DNA-binding protein | 24420-24440 4:01:01                  |
| GGCGCTCGAGGCCGCCGGCGG                 |       |       |       |                                                 |                                      |
| 24431                                 | 24461 | 21788 | 25315 | CDS product single-stranded DNA-binding protein | 24431-24461 7:04:01                  |
| CCGCCGGCGGCCGCGTCGCCGCCGCGCCGCC       |       |       |       |                                                 |                                      |
| 24481                                 | 24503 | 21788 | 25315 | CDS product single-stranded DNA-binding protein | 24481-24503 4:01:01                  |
| GGTCACGTCGGCGGGCAGCACGG               |       |       |       |                                                 |                                      |
| 24528                                 | 24566 | 21788 | 25315 | CDS product single-stranded DNA-binding protein | 24528-24566 7:04:01                  |
| CCAGGTGCGCCGCGCCGCGGCCACCGGTCCAGGTTCC |       |       |       |                                                 |                                      |
| 24579                                 | 24595 | 21788 | 25315 | CDS product single-stranded DNA-binding protein | 24579-24595 4:01:01                  |
| CCACGGCCCGGGGCC                       |       |       |       |                                                 |                                      |
| 24670                                 | 24698 | 21788 | 25315 | CDS product single-stranded DNA-binding protein | 24670-24698 5:02:01                  |
| GGAGCGGTTCTTGGCGTTGAAGGGGTCGG         |       |       |       |                                                 |                                      |
| 24780                                 | 24795 | 21788 | 25315 | CDS product single-stranded DNA-binding protein | 24780-24795 4:01:01 CCGTGCCCGCGCCCCC |
| 24825                                 | 24850 | 21788 | 25315 | CDS product single-stranded DNA-binding protein | 24825-24850 6:03:01                  |
| CCGCCTCCTGAAGCCGTCGGCCACC             |       |       |       |                                                 |                                      |
| 24873                                 | 24890 | 21788 | 25315 | CDS product single-stranded DNA-binding protein | 24873-24890 4:01:01                  |

|                                                              |       |       |       |                                                 |                                     |
|--------------------------------------------------------------|-------|-------|-------|-------------------------------------------------|-------------------------------------|
| CCGCGGCCAGGCCGAGCC                                           |       |       |       |                                                 |                                     |
| 24900                                                        | 24919 | 21788 | 25315 | CDS product single-stranded DNA-binding protein | 24900-24919 4:01:01                 |
| CCTCCGCGCCCGTCGTCTCC                                         |       |       |       |                                                 |                                     |
| 24930                                                        | 24957 | 21788 | 25315 | CDS product single-stranded DNA-binding protein | 24930-24957 5:02:01                 |
| CCACCGGCGTCCGGTAGGCCGAGAACCC                                 |       |       |       |                                                 |                                     |
| 25051                                                        | 25068 | 21788 | 25315 | CDS product single-stranded DNA-binding protein | 25051-25068 4:01:01                 |
| GGGGTGAAGTGGTTGGG                                            |       |       |       |                                                 |                                     |
| 25087                                                        | 25150 | 21788 | 25315 | CDS product single-stranded DNA-binding protein | 25087-25150 12:09:03                |
| CCCGCCGCCGAGCCCGGTGGTCCGGGCGCCGCCACCGCCACGTGCCCCGCGAAGCCGGCC |       |       |       |                                                 |                                     |
| 25138                                                        | 25162 | 21788 | 25315 | CDS product single-stranded DNA-binding protein | 25138-25162 4:01:01                 |
| GGCGAAGCCGGCCTCGACGGTCAGG                                    |       |       |       |                                                 |                                     |
| 25163                                                        | 25186 | 21788 | 25315 | CDS product single-stranded DNA-binding protein | 25163-25186 5:02:01                 |
| CCGCGCACCGCGGCCACCGCC                                        |       |       |       |                                                 |                                     |
| 25274                                                        | 25307 | 21788 | 25315 | CDS product single-stranded DNA-binding protein | 25274-25307 6:03:01                 |
| GGCGCGGCGCGCACGGTCACGGTCTTGCCGCGG                            |       |       |       |                                                 |                                     |
| 25607                                                        | 25621 | 25606 | 28752 | CDS product DNA polymerase catalytic subunit    | 25607-25621 4:01:01 GGCGGCGCGGCAGGG |
| 25744                                                        | 25761 | 25606 | 28752 | CDS product DNA polymerase catalytic subunit    | 25744-25761 4:01:01                 |
| CCACGCGGCCCATCCTCC                                           |       |       |       |                                                 |                                     |
| 25807                                                        | 25828 | 25606 | 28752 | CDS product DNA polymerase catalytic subunit    | 25807-25828 4:01:01                 |
| CCCCGAGCGGCCCGTGAGTCC                                        |       |       |       |                                                 |                                     |
| 25999                                                        | 26016 | 25606 | 28752 | CDS product DNA polymerase catalytic subunit    | 25999-26016 4:01:01                 |
| CCGAGGCCGACGCCGCC                                            |       |       |       |                                                 |                                     |
| 26075                                                        | 26093 | 25606 | 28752 | CDS product DNA polymerase catalytic subunit    | 26075-26093 4:01:01                 |

|                                                         |       |       |       |                                              |                     |
|---------------------------------------------------------|-------|-------|-------|----------------------------------------------|---------------------|
| 26143                                                   | 26163 | 25606 | 28752 | CDS product DNA polymerase catalytic subunit | 26143-26163 4:01:01 |
| CCGCGCCTCGGGCCCGCC<br>CCCCCGCGGCCCTTCTACC               |       |       |       |                                              |                     |
| 26300                                                   | 26318 | 25606 | 28752 | CDS product DNA polymerase catalytic subunit | 26300-26318 4:01:01 |
| CCGCCTGCGGCCCGGGCCC<br>GCCCCGGGCCGCGGGGAGCGGTGGTGCTGCGG |       |       |       |                                              |                     |
| 26308                                                   | 26342 | 25606 | 28752 | CDS product DNA polymerase catalytic subunit | 26308-26342 6:03:01 |
| CCTTCCCCGCGCCGAGAACCCGAGGACCTGGTGATCC                   |       |       |       |                                              |                     |
| 26476                                                   | 26514 | 25606 | 28752 | CDS product DNA polymerase catalytic subunit | 26476-26514 7:04:01 |
| GGCCGAGGAGGCGCTCGG                                      |       |       |       |                                              |                     |
| 26933                                                   | 26950 | 25606 | 28752 | CDS product DNA polymerase catalytic subunit | 26933-26950 4:01:01 |
| GGACGACGGCGGCGCTACCAGGGCGCCAAGG                         |       |       |       |                                              |                     |
| 27242                                                   | 27273 | 25606 | 28752 | CDS product DNA polymerase catalytic subunit | 27242-27273 6:03:01 |
| GGCGGCCATCAAGGTGG                                       |       |       |       |                                              |                     |
| 27584                                                   | 27600 | 25606 | 28752 | CDS product DNA polymerase catalytic subunit | 27584-27600 4:01:01 |
| GGTGTACGGGTTCACGGGCGTGGCCAACGGG                         |       |       |       |                                              |                     |
| 27611                                                   | 27641 | 25606 | 28752 | CDS product DNA polymerase catalytic subunit | 27611-27641 5:02:01 |
| CCCCTGCCTCCCCGTGGCGGCCACCGTGACGACCATCGGCC               |       |       |       |                                              |                     |
| 27647                                                   | 27687 | 25606 | 28752 | CDS product DNA polymerase catalytic subunit | 27647-27687 7:04:01 |
| CCTGCCCCGCGCGCCGCCC                                     |       |       |       |                                              |                     |
| 27758                                                   | 27776 | 25606 | 28752 | CDS product DNA polymerase catalytic subunit | 27758-27776 4:01:01 |
| GGTCTACGGGGACACGGACTCGG                                 |       |       |       |                                              |                     |
| 27800                                                   | 27822 | 25606 | 28752 | CDS product DNA polymerase catalytic subunit | 27800-27822 4:01:01 |

|                                      |       |       |       |                                              |                                     |
|--------------------------------------|-------|-------|-------|----------------------------------------------|-------------------------------------|
| 27902                                | 27917 | 25606 | 28752 | CDS product DNA polymerase catalytic subunit | 27902-27917 4:01:01 CCTCTCCGCCCCCCC |
| 28089                                | 28116 | 25606 | 28752 | CDS product DNA polymerase catalytic subunit | 28089-28116 5:02:01                 |
| GGCGACGAGGCCGTCTCGGCGGCAGCGG         |       |       |       |                                              |                                     |
| 28221                                | 28242 | 25606 | 28752 | CDS product DNA polymerase catalytic subunit | 28221-28242 5:02:01                 |
| GGCGGCGCCGGCCTGGACGTGG               |       |       |       |                                              |                                     |
| 28301                                | 28323 | 25606 | 28752 | CDS product DNA polymerase catalytic subunit | 28301-28323 5:02:01                 |
| CCTGCCGCACCTACCGTCTACC               |       |       |       |                                              |                                     |
| 28417                                | 28445 | 25606 | 28752 | CDS product DNA polymerase catalytic subunit | 28417-28445 5:02:01                 |
| CCGGGGCCGTGCGCCGGGCCTCGCGCCC         |       |       |       |                                              |                                     |
| 28466                                | 28484 | 25606 | 28752 | CDS product DNA polymerase catalytic subunit | 28466-28484 4:01:01                 |
| CCTGGCCGAGGACCCCGCC                  |       |       |       |                                              |                                     |
| 28875                                | 28889 | 28673 | 29488 | CDS product nuclear egress lamina protein    | 28875-28889 4:01:01 GGTGGCCGGCGCAGG |
| 29085                                | 29113 | 28673 | 29488 | CDS product nuclear egress lamina protein    | 29085-29113 5:02:01                 |
| CCGAGGGGTCCCGCGCGGCCACCGAGGCC        |       |       |       |                                              |                                     |
| 29101                                | 29125 | 28673 | 29488 | CDS product nuclear egress lamina protein    | 29101-29125 4:01:01                 |
| GGCCACCGAGGCCAGGAACACGCGG            |       |       |       |                                              |                                     |
| 29198                                | 29221 | 28673 | 29488 | CDS product nuclear egress lamina protein    | 29198-29221 5:02:01                 |
| GGCTCGGCGGCGGCGCACGTGGGG             |       |       |       |                                              |                                     |
| 29280                                | 29292 | 28673 | 29488 | CDS product nuclear egress lamina protein    | 29280-29292 4:01:01 CCACCGCCTGGCC   |
| 29371                                | 29400 | 28673 | 29488 | CDS product nuclear egress lamina protein    | 29371-29400 4:01:01                 |
| GGGCTGCGCGGCCGCTAGGCAAAGTAGGG        |       |       |       |                                              |                                     |
| 29718                                | 29753 | 29481 | 30893 | CDS product DNA packaging protein UL32       | 29718-29753 6:03:01                 |
| GGGTCCGCCTGGCGCTCGGCCACGGCGCACAGGGGG |       |       |       |                                              |                                     |

|                                        |       |       |       |                                             |
|----------------------------------------|-------|-------|-------|---------------------------------------------|
| 30059                                  | 30077 | 29481 | 30893 | CDS product DNA packaging protein UL32      |
| 30073                                  | 30096 | 29481 | 30893 | CDS product DNA packaging protein UL32      |
| 30157                                  | 30176 | 29481 | 30893 | CDS product DNA packaging protein UL32      |
| 30188                                  | 30216 | 29481 | 30893 | CDS product DNA packaging protein UL32      |
| GGCGAGGTCGGCGTAGCCGGGCCCCGGCGG         |       |       |       |                                             |
| 30220                                  | 30241 | 29481 | 30893 | CDS product DNA packaging protein UL32      |
| 30242                                  | 30258 | 29481 | 30893 | CDS product DNA packaging protein UL32      |
| 30280                                  | 30296 | 29481 | 30893 | CDS product DNA packaging protein UL32      |
| 30324                                  | 30347 | 29481 | 30893 | CDS product DNA packaging protein UL32      |
| 30593                                  | 30627 | 29481 | 30893 | CDS product DNA packaging protein UL32      |
| GGCCGTGGCGCACGGGGGCAGGCCAGGGCCTTG      |       |       |       |                                             |
| 30637                                  | 30654 | 29481 | 30893 | CDS product DNA packaging protein UL32      |
| 30721                                  | 30758 | 29481 | 30893 | CDS product DNA packaging protein UL32      |
| CCAGCGCCAGCGGCGCCGCGGCGGCCTCCACGAAGCCC |       |       |       |                                             |
| 30893                                  | 30918 | 30892 | 31239 | CDS product DNA packaging protein UL33      |
| GGCGCGCGGCGGCGGCGGCGCGGCGG             |       |       |       |                                             |
| 30982                                  | 30997 | 30892 | 31239 | CDS product DNA packaging protein UL33      |
| 31134                                  | 31154 | 30892 | 31239 | CDS product DNA packaging protein UL33      |
| 31473                                  | 31494 | 31398 | 32186 | CDS product nuclear egress membrane protein |
| CCTGCGACCCCGAGCGCCCCC                  |       |       |       |                                             |
| 31513                                  | 31530 | 31398 | 32186 | CDS product nuclear egress membrane protein |
| 31657                                  | 31681 | 31398 | 32186 | CDS product nuclear egress membrane protein |
| CCGGCCCCCGACGCCCCCCTGGCC               |       |       |       |                                             |

|             |         |                          |
|-------------|---------|--------------------------|
| 30059-30077 | 4:01:01 | GGCGGTGTTGCGGGCCAGG      |
| 30073-30096 | 4:01:01 | CCAGGAAGCCCTCGTGCTCCGCCC |
| 30157-30176 | 4:01:01 | CCCCCGTGGCCACGTTGCC      |
| 30188-30216 | 6:03:01 |                          |
| 30220-30241 | 5:02:01 | CCGCGTCCGCGGCCCCGCCCC    |
| 30242-30258 | 5:02:01 | GGTGGCGGCGGCGACGG        |
| 30280-30296 | 4:01:01 | CCTCGCGCTCCGCGCC         |
| 30324-30347 | 5:02:01 | CCCGTGTGGTCCTTCCAGCCCCC  |
| 30593-30627 | 7:04:01 |                          |
| 30637-30654 | 4:01:01 | CCGCGTAGTCCGCCAGCC       |
| 30721-30758 | 6:03:01 |                          |
| 30893-30918 | 7:04:01 |                          |
| 30982-30997 | 4:01:01 | CCAACTACCTGCCCCC         |
| 31134-31154 | 4:01:01 | GGGGAGGCGCTGCGGGCGCGG    |
| 31473-31494 | 4:01:01 |                          |
| 31513-31530 | 4:01:01 | GGTCCACGGGCGAGACGG       |
| 31657-31681 | 6:03:01 |                          |

|                                                  |       |       |       |                                             |                      |                           |
|--------------------------------------------------|-------|-------|-------|---------------------------------------------|----------------------|---------------------------|
| 31772                                            | 31789 | 31398 | 32186 | CDS product nuclear egress membrane protein | 31772-31789 4:01:01  | GGGGGCGTGGACACGCGG        |
| 31891                                            | 31906 | 31398 | 32186 | CDS product nuclear egress membrane protein | 31891-31906 4:01:01  | CCTCCTGGACCGCGCC          |
| 31937                                            | 31972 | 31398 | 32186 | CDS product nuclear egress membrane protein | 31937-31972 8:05:02  |                           |
| GGCGGGGGTGCCGGCGGCGGACGACGGCGAGGGG               |       |       |       |                                             |                      |                           |
| 31973                                            | 32002 | 31398 | 32186 | CDS product nuclear egress membrane protein | 31973-32002 6:03:01  |                           |
| CCCTCGCCCCGCGCGCCCATCCGCCCCGACC                  |       |       |       |                                             |                      |                           |
| 32047                                            | 32068 | 31398 | 32186 | CDS product nuclear egress membrane protein | 32047-32068 5:02:01  |                           |
| CCAGGCCGCGTACCCCCCGCCC                           |       |       |       |                                             |                      |                           |
| 32406                                            | 32426 | 32241 | 32552 | CDS product small capsid protein            | 32406-32426 4:01:01  | CCTCCCTGGCCCTCGTGAACC     |
| 32461                                            | 32479 | 32241 | 32552 | CDS product small capsid protein            | 32461-32479 4:01:01  | CCAGCCCATGTTCGCCACC       |
| 32496                                            | 32514 | 32241 | 32552 | CDS product small capsid protein            | 32496-32514 4:01:01  | GGCCCCGGCCACGGTCGG        |
| 33280                                            | 33329 | 33060 | 42314 | CDS product large tegument protein          | 33280-33329 10:07:02 |                           |
| CCTCGTCCCCGTCTCGTCCCCCTCTCGTCCTCCAGGCCCCAGGGGTCC |       |       |       |                                             |                      |                           |
| 33388                                            | 33424 | 33060 | 42314 | CDS product large tegument protein          | 33388-33424 8:05:02  |                           |
| GGCCGAGGCCGCCAGGGGAGAGCGGCGGCGGAGG               |       |       |       |                                             |                      |                           |
| 33444                                            | 33464 | 33060 | 42314 | CDS product large tegument protein          | 33444-33464 6:03:01  | GGCGGAGGATGGGCGGGAGGG     |
| 33495                                            | 33509 | 33060 | 42314 | CDS product large tegument protein          | 33495-33509 5:02:01  | GGGGGCTGGTGGGGG           |
| 33519                                            | 33538 | 33060 | 42314 | CDS product large tegument protein          | 33519-33538 4:01:01  | GGGGAGCGCGGGGCCGGCGG      |
| 33549                                            | 33574 | 33060 | 42314 | CDS product large tegument protein          | 33549-33574 6:03:01  | GGCGGGAGCTCGGGGTGGTGCCGGG |
| 33585                                            | 33598 | 33060 | 42314 | CDS product large tegument protein          | 33585-33598 4:01:01  | GGCGGCGGCCACGG            |
| 33666                                            | 33697 | 33060 | 42314 | CDS product large tegument protein          | 33666-33697 9:06:02  |                           |
| GGCTGAGGGGGCGGCGGTGGCGGCAGCGGCGG                 |       |       |       |                                             |                      |                           |
| 33710                                            | 33744 | 33060 | 42314 | CDS product large tegument protein          | 33710-33744 7:04:01  |                           |

|                                                                                             |       |       |       |                                    |                                             |
|---------------------------------------------------------------------------------------------|-------|-------|-------|------------------------------------|---------------------------------------------|
| GGGGAAGTGGACCGCGGGTCCGACGGCGGGGGG                                                           |       |       |       |                                    |                                             |
| 33785                                                                                       | 33803 | 33060 | 42314 | CDS product large tegument protein | 33785-33803 4:01:01 CCACGTCCACGGCGCCTCC     |
| 33822                                                                                       | 33844 | 33060 | 42314 | CDS product large tegument protein | 33822-33844 6:03:01 GGCTGCGGCGGCAGCGGCGGAGG |
| 33882                                                                                       | 34008 | 33060 | 42314 | CDS product large tegument protein | 33882-34008 30:27:07                        |
| GGCGTCGGGGCCGGCCGGAAGGTGGTGGGGCCGGCGGTGGTGC GGCGGGGGCGGAAGAGGTGGTGGCGGAAGACGAGGAGGTGGTGGTGG |       |       |       |                                    |                                             |
| 34015                                                                                       | 34034 | 33060 | 42314 | CDS product large tegument protein | 34015-34034 5:02:01 CCGCCGCCGCTGCTGCCGCC    |
| 34058                                                                                       | 34068 | 33060 | 42314 | CDS product large tegument protein | 34058-34068 4:01:01 GGAGGGGGCGG             |
| 34092                                                                                       | 34110 | 33060 | 42314 | CDS product large tegument protein | 34092-34110 4:01:01 GGAGACCGCGCGGCTGGG      |
| 34119                                                                                       | 34150 | 33060 | 42314 | CDS product large tegument protein | 34119-34150 6:03:01                         |
| GGGGCGGGAGTCTCTGGCGAGGCCGCGCAGAGG                                                           |       |       |       |                                    |                                             |
| 34176                                                                                       | 34233 | 33060 | 42314 | CDS product large tegument protein | 34176-34233 13:10:03                        |
| GGCTGCGGCGCGGGATGTGGAGACGGAGGTGCCCCGCCGGCGGGCGCGGGCCGCGG                                    |       |       |       |                                    |                                             |
| 34248                                                                                       | 34264 | 33060 | 42314 | CDS product large tegument protein | 34248-34264 4:01:01 CCTCCGGGGCCGACTCC       |
| 34265                                                                                       | 34278 | 33060 | 42314 | CDS product large tegument protein | 34265-34278 4:01:01 GGGGGCGGGGACGG          |
| 34332                                                                                       | 34363 | 33060 | 42314 | CDS product large tegument protein | 34332-34363 6:03:01                         |
| GGCGCTTGGGCTTGGGCTTGAAGCGGGCGCGG                                                            |       |       |       |                                    |                                             |
| 34376                                                                                       | 34393 | 33060 | 42314 | CDS product large tegument protein | 34376-34393 4:01:01 GGGAGGACGGCCCTCGGG      |
| 34418                                                                                       | 34450 | 33060 | 42314 | CDS product large tegument protein | 34418-34450 5:02:01                         |
| GGTCTGGCGCGGGGCCGATACGGGCCTTCGCGG                                                           |       |       |       |                                    |                                             |
| 34594                                                                                       | 34615 | 33060 | 42314 | CDS product large tegument protein | 34594-34615 5:02:01 CCGCAGCCGGGCCACCGTCTCC  |
| 34626                                                                                       | 34645 | 33060 | 42314 | CDS product large tegument protein | 34626-34645 4:01:01 CCACCACTCCCGGGGGCTCC    |
| 34637                                                                                       | 34659 | 33060 | 42314 | CDS product large tegument protein | 34637-34659 5:02:01 GGGGGCTCCAGGAGGTGCTCGGG |
| 34707                                                                                       | 34791 | 33060 | 42314 | CDS product large tegument protein | 34707-34791 16:13:04                        |

GGTGTTCCGGCCGGGAAGAAGAGGATGAGGCGGCTTCTCGGGACGGGGTCGAGGCGGCGGAGGAGGACGCGGACGCGGGCTCGG

|                                                                                                                                  |       |       |       |                                    |             |          |                         |
|----------------------------------------------------------------------------------------------------------------------------------|-------|-------|-------|------------------------------------|-------------|----------|-------------------------|
| 34891                                                                                                                            | 34911 | 33060 | 42314 | CDS product large tegument protein | 34891-34911 | 6:03:01  | GGGGCGGCCCCGGGAGGCGG    |
| 34914                                                                                                                            | 34930 | 33060 | 42314 | CDS product large tegument protein | 34914-34930 | 5:02:01  | CCCGCCACCTTCCCACC       |
| 34937                                                                                                                            | 34972 | 33060 | 42314 | CDS product large tegument protein | 34937-34972 | 6:03:01  |                         |
| GGCGTCGCGGACGTCCGGCGGTGCACCGGCCTTCGG                                                                                             |       |       |       |                                    |             |          |                         |
| 34994                                                                                                                            | 35040 | 33060 | 42314 | CDS product large tegument protein | 34994-35040 | 9:06:02  |                         |
| GGATTTCTTGCCGATGGGGCGGGCCCGGGCGGGGGGCGTGGGGG                                                                                     |       |       |       |                                    |             |          |                         |
| 35049                                                                                                                            | 35081 | 33060 | 42314 | CDS product large tegument protein | 35049-35081 | 7:04:01  |                         |
| GGGGCAGACGGTGGTGGAGGGCGGCCTGGGG                                                                                                  |       |       |       |                                    |             |          |                         |
| 35100                                                                                                                            | 35135 | 33060 | 42314 | CDS product large tegument protein | 35100-35135 | 9:06:02  |                         |
| GGTGGTGGAGGGCGGGCGGTGCGGCGGGCCTGGGG                                                                                              |       |       |       |                                    |             |          |                         |
| 35154                                                                                                                            | 35182 | 33060 | 42314 | CDS product large tegument protein | 35154-35182 | 8:05:02  |                         |
| GGTGGTGGGGGGCGGGCGGGCGGGGGG                                                                                                      |       |       |       |                                    |             |          |                         |
| 35193                                                                                                                            | 35231 | 33060 | 42314 | CDS product large tegument protein | 35193-35231 | 9:06:02  |                         |
| GGCTTGCGGCCGGTTGGGACGACGGGGCTGAGGGGGG                                                                                            |       |       |       |                                    |             |          |                         |
| 35240                                                                                                                            | 35274 | 33060 | 42314 | CDS product large tegument protein | 35240-35274 | 9:06:02  |                         |
| GGCCGCGGTCGCGGCGGATGGTGGAGGGGGGCGG                                                                                               |       |       |       |                                    |             |          |                         |
| 35284                                                                                                                            | 35299 | 33060 | 42314 | CDS product large tegument protein | 35284-35299 | 4:01:01  | GGGCCCCGGTCGGCGG        |
| 35308                                                                                                                            | 35496 | 33060 | 42314 | CDS product large tegument protein | 35308-35496 | 40:37:10 |                         |
| GGGGGGTGGCCTTGGGCGCGGTGGTGGCGGCGGCGGTGGCGGGCTGCGCCGGGGGCTTCTGGGCAGGGGGGGCCTGGGCCGACGGGGGCTGCGGCGGCGGTGGGGGACCCTGGGGTTGGGGGGTCGGC |       |       |       |                                    |             |          |                         |
| TTGGCCGCGGCGGGCGGCTGGGCCTGGGGGGCCTCCGGGGGGCCGTCTCGGGCGCCGGGG                                                                     |       |       |       |                                    |             |          |                         |
| 35458                                                                                                                            | 35480 | 33060 | 42314 | CDS product large tegument protein | 35458-35480 | 4:01:01  | CCTGGGGGGCCTCCGGGGGGGCC |
| 35526                                                                                                                            | 35536 | 33060 | 42314 | CDS product large tegument protein | 35526-35536 | 4:01:01  | GGCGGCGGGGG             |



|                                                                                    |       |       |       |                                    |             |          |                             |
|------------------------------------------------------------------------------------|-------|-------|-------|------------------------------------|-------------|----------|-----------------------------|
| 35586                                                                              | 35608 | 33060 | 42314 | CDS product large tegument protein | 35586-35608 | 5:02:01  | GGCTTGGGGCGGGCTCCCGGGG      |
| 35618                                                                              | 35650 | 33060 | 42314 | CDS product large tegument protein | 35618-35650 | 8:05:02  |                             |
| GGGGGCCGCGCGCCTTGGTGCCGGCGGCGGG                                                    |       |       |       |                                    |             |          |                             |
| 35659                                                                              | 35671 | 33060 | 42314 | CDS product large tegument protein | 35659-35671 | 4:01:01  | GGGCGGCGGGGGG               |
| 35682                                                                              | 35709 | 33060 | 42314 | CDS product large tegument protein | 35682-35709 | 5:02:01  | GGCTGCGGCTCGGCTTGGTGAGCGGGG |
| 35720                                                                              | 35764 | 33060 | 42314 | CDS product large tegument protein | 35720-35764 | 10:07:02 |                             |
| GGGCTTGGCGGGCGGCGCGCCGGCGGGGCCAGCTTGGCGGCGGG                                       |       |       |       |                                    |             |          |                             |
| 35777                                                                              | 35863 | 33060 | 42314 | CDS product large tegument protein | 35777-35863 | 17:14:04 |                             |
| GGGCTTGGCGGGCGGCGCGCCGGCGGGGCCCGGGCCAACGGCGGGAGCGTGGGCGGGTCGACCGCGGCGACGGGGGCAGCGG |       |       |       |                                    |             |          |                             |
| 35797                                                                              | 35816 | 33060 | 42314 | CDS product large tegument protein | 35797-35816 | 4:01:01  | CCGGCGGGGCCCGGGGCC          |
| 35939                                                                              | 35957 | 33060 | 42314 | CDS product large tegument protein | 35939-35957 | 5:02:01  | CCCGTCGTCTCCCCCGCC          |
| 35963                                                                              | 36001 | 33060 | 42314 | CDS product large tegument protein | 35963-36001 | 7:04:01  |                             |
| GGGGGGCAGCCCGGGGATCGGGCCGCGGGCCGGGTGGG                                             |       |       |       |                                    |             |          |                             |
| 36014                                                                              | 36056 | 33060 | 42314 | CDS product large tegument protein | 36014-36056 | 7:04:01  |                             |
| GGCGTATGGGAACGGGTCGCCAGGTTGCGGAAGCTCGGCCGG                                         |       |       |       |                                    |             |          |                             |
| 36067                                                                              | 36086 | 33060 | 42314 | CDS product large tegument protein | 36067-36086 | 4:01:01  | CCTCCGAGGTGGCCGGGTCC        |
| 36074                                                                              | 36093 | 33060 | 42314 | CDS product large tegument protein | 36074-36093 | 4:01:01  | GGTGGCCGGGTCCACGCGGG        |
| 36216                                                                              | 36238 | 33060 | 42314 | CDS product large tegument protein | 36216-36238 | 5:02:01  | GGGCGTCGCGGCGGCTCGGGCGG     |
| 36286                                                                              | 36310 | 33060 | 42314 | CDS product large tegument protein | 36286-36310 | 5:02:01  | GGCAGGCCGGCTCGCCGGCCAGGGG   |
| 36292                                                                              | 36317 | 33060 | 42314 | CDS product large tegument protein | 36292-36317 | 5:02:01  | CCGGCTCGCCGGCCAGGGCCGCGCC   |
| 36547                                                                              | 36566 | 33060 | 42314 | CDS product large tegument protein | 36547-36566 | 5:02:01  | CCGCCGCCGCGCCAGGTCC         |
| 36651                                                                              | 36680 | 33060 | 42314 | CDS product large tegument protein | 36651-36680 | 5:02:01  |                             |
| CCGGCGCCCGGCGCGCCGAGCGCCGCGGCC                                                     |       |       |       |                                    |             |          |                             |

|                                                       |       |       |       |                                    |
|-------------------------------------------------------|-------|-------|-------|------------------------------------|
| 36698                                                 | 36723 | 33060 | 42314 | CDS product large tegument protein |
| 36844                                                 | 36896 | 33060 | 42314 | CDS product large tegument protein |
| CCAGCCGCTGCCCCGTCTCCGTGTGCGCCAGGGCGCCACAGCTCCGTCTCC   |       |       |       |                                    |
| 36981                                                 | 37007 | 33060 | 42314 | CDS product large tegument protein |
| 37090                                                 | 37116 | 33060 | 42314 | CDS product large tegument protein |
| 37104                                                 | 37121 | 33060 | 42314 | CDS product large tegument protein |
| 37142                                                 | 37157 | 33060 | 42314 | CDS product large tegument protein |
| 37234                                                 | 37260 | 33060 | 42314 | CDS product large tegument protein |
| 37265                                                 | 37277 | 33060 | 42314 | CDS product large tegument protein |
| 37368                                                 | 37397 | 33060 | 42314 | CDS product large tegument protein |
| CCCGCCACGGTCGCCGTCTCCATGAGCCCC                        |       |       |       |                                    |
| 37634                                                 | 37657 | 33060 | 42314 | CDS product large tegument protein |
| 37658                                                 | 37676 | 33060 | 42314 | CDS product large tegument protein |
| 37711                                                 | 37733 | 33060 | 42314 | CDS product large tegument protein |
| 37736                                                 | 37754 | 33060 | 42314 | CDS product large tegument protein |
| 37937                                                 | 37959 | 33060 | 42314 | CDS product large tegument protein |
| 37975                                                 | 37994 | 33060 | 42314 | CDS product large tegument protein |
| 38014                                                 | 38031 | 33060 | 42314 | CDS product large tegument protein |
| 38017                                                 | 38039 | 33060 | 42314 | CDS product large tegument protein |
| 38042                                                 | 38057 | 33060 | 42314 | CDS product large tegument protein |
| 38069                                                 | 38124 | 33060 | 42314 | CDS product large tegument protein |
| CCCAAAGTCCTCCAGGCCTCGTCCAGGCGACCTCGGCGCCGTCAGCCGCTGCC |       |       |       |                                    |
| 38314                                                 | 38336 | 33060 | 42314 | CDS product large tegument protein |

|             |         |                             |
|-------------|---------|-----------------------------|
| 36698-36723 | 4:01:01 | GGCGTCCAGGCGCTCGGTGACCGCGG  |
| 36844-36896 | 8:05:02 |                             |
| 36981-37007 | 5:02:01 | CCCGCGTCCAGCGTGTCCACCGCGTCC |
| 37090-37116 | 4:01:01 | GGTGCCTCGGCTCGCCGGCCACCGCGG |
| 37104-37121 | 5:02:01 | CCGGCCACCGCGGCCACC          |
| 37142-37157 | 4:01:01 | CCGCACCGCCGCTCC             |
| 37234-37260 | 5:02:01 | CCGCGGCGGCTTGCCGCCGAGTCCC   |
| 37265-37277 | 4:01:01 | GGCGGCGCGGTGG               |
| 37368-37397 | 5:02:01 |                             |
| 37634-37657 | 4:01:01 | GGCGCGGCGCGCGCCGCGTCCG      |
| 37658-37676 | 4:01:01 | CCCCGCGCCGCGTAGGCC          |
| 37711-37733 | 5:02:01 | GGTAGGCGGCTACTTGGGCGGG      |
| 37736-37754 | 4:01:01 | CCACCGCGGAGCCGCTCC          |
| 37937-37959 | 5:02:01 | GGCGGGCAGGCGGGTAGACGG       |
| 37975-37994 | 4:01:01 | CCAGCACCTCCATGGTCGCC        |
| 38014-38031 | 4:01:01 | GGGCTCGGCCAGGGGG            |
| 38017-38039 | 4:01:01 | CCTCGGCCAGGGGGCTCGTCC       |
| 38042-38057 | 4:01:01 | GGAGGCGCCGCGCGG             |
| 38069-38124 | 9:06:02 |                             |
| 38314-38336 | 5:02:01 | CCGCCTGCGTCACCAGCTCCTCC     |

|                                          |       |       |       |                                    |
|------------------------------------------|-------|-------|-------|------------------------------------|
| 38339                                    | 38351 | 33060 | 42314 | CDS product large tegument protein |
| 38366                                    | 38377 | 33060 | 42314 | CDS product large tegument protein |
| 38437                                    | 38456 | 33060 | 42314 | CDS product large tegument protein |
| 38482                                    | 38510 | 33060 | 42314 | CDS product large tegument protein |
| CCGTCGCCGCGGCTGGTCCGCCTCCGCC             |       |       |       |                                    |
| 38745                                    | 38762 | 33060 | 42314 | CDS product large tegument protein |
| 38773                                    | 38807 | 33060 | 42314 | CDS product large tegument protein |
| CCGCGCGCCGCGCGCCAGGGCGGCCAGCTCGGCC       |       |       |       |                                    |
| 38869                                    | 38891 | 33060 | 42314 | CDS product large tegument protein |
| 38924                                    | 38937 | 33060 | 42314 | CDS product large tegument protein |
| 39072                                    | 39085 | 33060 | 42314 | CDS product large tegument protein |
| 39086                                    | 39123 | 33060 | 42314 | CDS product large tegument protein |
| GGCGTTCTCGGGCAGGTGCGGGTTGAAGGCGAACACGG   |       |       |       |                                    |
| 39137                                    | 39156 | 33060 | 42314 | CDS product large tegument protein |
| 39322                                    | 39332 | 33060 | 42314 | CDS product large tegument protein |
| 39343                                    | 39376 | 33060 | 42314 | CDS product large tegument protein |
| CCTCCACGGCCGCCACGGCCGCTCCAGCTCGCC        |       |       |       |                                    |
| 39421                                    | 39455 | 33060 | 42314 | CDS product large tegument protein |
| CCTCCACGGCGGCCGCGCGCCACCTCCAGCGCC        |       |       |       |                                    |
| 39517                                    | 39539 | 33060 | 42314 | CDS product large tegument protein |
| 39550                                    | 39572 | 33060 | 42314 | CDS product large tegument protein |
| 39608                                    | 39647 | 33060 | 42314 | CDS product large tegument protein |
| CCGCGCCAGCGGCTCCAGGAAGCCCAGCTCCGGGTGCTCC |       |       |       |                                    |

|             |         |                         |
|-------------|---------|-------------------------|
| 38339-38351 | 4:01:01 | GGAGGCGGCCCCGG          |
| 38366-38377 | 4:01:01 | GGCCGGCGGCGG            |
| 38437-38456 | 6:03:01 | CCGCCGCCGCGTCCACCACC    |
| 38482-38510 | 7:04:01 |                         |
| 38745-38762 | 4:01:01 | CCGCGGCTGCCCGCGGCC      |
| 38773-38807 | 5:02:01 |                         |
| 38869-38891 | 4:01:01 | CCATGTCCGCCCCGACGAAGCCC |
| 38924-38937 | 4:01:01 | GGCGGCGGCGCGGG          |
| 39072-39085 | 4:01:01 | CCCGCCGCCGCGCC          |
| 39086-39123 | 6:03:01 |                         |
| 39137-39156 | 4:01:01 | GGTCACGGTCTCGGCGTTGG    |
| 39322-39332 | 4:01:01 | CCACCTCCGCC             |
| 39343-39376 | 8:05:02 |                         |
| 39421-39455 | 7:04:01 |                         |
| 39517-39539 | 6:03:01 | CCACGGCCGCCGCCACGGCCGCC |
| 39550-39572 | 4:01:01 | CCTGCAGCGCCGCCACGCGCTCC |
| 39608-39647 | 6:03:01 |                         |

|                                                          |       |       |       |                                    |             |                                     |
|----------------------------------------------------------|-------|-------|-------|------------------------------------|-------------|-------------------------------------|
| 39664                                                    | 39722 | 33060 | 42314 | CDS product large tegument protein | 39664-39722 | 14:11:03                            |
| CCCCCGCCGCGCGCCGCCTTCTCCGCCGTGTCGCGTCCGCCAGCGCCGCCGCCACC |       |       |       |                                    |             |                                     |
| 39800                                                    | 39820 | 33060 | 42314 | CDS product large tegument protein | 39800-39820 | 4:01:01 CCGGCGCCCCACCAGCGCGCC       |
| 39853                                                    | 39887 | 33060 | 42314 | CDS product large tegument protein | 39853-39887 | 6:03:01                             |
| CCACCAGGCGCCACAGCGCCGCGAGCACCGTGCCC                      |       |       |       |                                    |             |                                     |
| 39922                                                    | 39935 | 33060 | 42314 | CDS product large tegument protein | 39922-39935 | 4:01:01 CCACCGCCGGGCCC              |
| 40138                                                    | 40157 | 33060 | 42314 | CDS product large tegument protein | 40138-40157 | 4:01:01 CCTCGTCCGGGGCGGCCGCC        |
| 40146                                                    | 40173 | 33060 | 42314 | CDS product large tegument protein | 40146-40173 | 5:02:01 GGGGCGGCCGCCAGGGCGCGTCCATGG |
| 40189                                                    | 40215 | 33060 | 42314 | CDS product large tegument protein | 40189-40215 | 5:02:01 GGTCGGCGTCGGCCGAGGCGCGCTTGG |
| 40268                                                    | 40301 | 33060 | 42314 | CDS product large tegument protein | 40268-40301 | 6:03:01                             |
| CCGCTCCAGGTGCCCCGTGCGCCTGCGCCTCGGCC                      |       |       |       |                                    |             |                                     |
| 40345                                                    | 40358 | 33060 | 42314 | CDS product large tegument protein | 40345-40358 | 4:01:01 CCTCGCCCCGCTCC              |
| 40418                                                    | 40436 | 33060 | 42314 | CDS product large tegument protein | 40418-40436 | 4:01:01 CCGCTCCTCGGCGGCCGCC         |
| 40642                                                    | 40673 | 33060 | 42314 | CDS product large tegument protein | 40642-40673 | 7:04:01                             |
| CCGCGCCGCCCGCGCCGGGCGCCCCCGGTCC                          |       |       |       |                                    |             |                                     |
| 40830                                                    | 40856 | 33060 | 42314 | CDS product large tegument protein | 40830-40856 | 5:02:01 CCGCCGGGGTCCCGCGCCGCGGCGTCC |
| 40951                                                    | 40973 | 33060 | 42314 | CDS product large tegument protein | 40951-40973 | 4:01:01 CCGCGACCAGCGCCAGCTTGCC      |
| 41047                                                    | 41075 | 33060 | 42314 | CDS product large tegument protein | 41047-41075 | 5:02:01                             |
| CCACAAAGTCCCCGGCCGGGCGCGCTCC                             |       |       |       |                                    |             |                                     |
| 41145                                                    | 41165 | 33060 | 42314 | CDS product large tegument protein | 41145-41165 | 4:01:01 CCGTTCTCCACCAGAAAGTCC       |
| 41210                                                    | 41234 | 33060 | 42314 | CDS product large tegument protein | 41210-41234 | 4:01:01 GGCGGCCCCGGGAACAGGCTCCGG    |
| 41336                                                    | 41357 | 33060 | 42314 | CDS product large tegument protein | 41336-41357 | 4:01:01 GGGCTCGCGGGTGCGCGGGCGG      |
| 41372                                                    | 41384 | 33060 | 42314 | CDS product large tegument protein | 41372-41384 | 4:01:01 CCGCCCGCCGACC               |

|                                                     |       |       |       |                                    |                                                |
|-----------------------------------------------------|-------|-------|-------|------------------------------------|------------------------------------------------|
| 41401                                               | 41432 | 33060 | 42314 | CDS product large tegument protein | 41401-41432 6:03:01                            |
| GGTCCTCCTGGCTCGCCGGCCACGGGGGCCGG                    |       |       |       |                                    |                                                |
| 41404                                               | 41436 | 33060 | 42314 | CDS product large tegument protein | 41404-41436 6:03:01                            |
| CCTCCTGGCTCGCCGGCCACGGGGGCCGGCGCC                   |       |       |       |                                    |                                                |
| 41461                                               | 41485 | 33060 | 42314 | CDS product large tegument protein | 41461-41485 6:03:01 GGACCCGCGGCGGCGGGGAGCGG    |
| 41495                                               | 41517 | 33060 | 42314 | CDS product large tegument protein | 41495-41517 6:03:01 GGGTGCCGGGCGGGGGCGGCGG     |
| 41528                                               | 41576 | 33060 | 42314 | CDS product large tegument protein | 41528-41576 10:07:02                           |
| GGGGACGGCGGGACGGGGCGACGGCGAGGACGGGGATGGCCCCGGGG     |       |       |       |                                    |                                                |
| 41586                                               | 41638 | 33060 | 42314 | CDS product large tegument protein | 41586-41638 11:08:02                           |
| GGCGGCGCGGCGGCCCGGGTCCGGCGGCAGGGCCATCGGGTGCACGGAGGG |       |       |       |                                    |                                                |
| 41699                                               | 41729 | 33060 | 42314 | CDS product large tegument protein | 41699-41729 6:03:01                            |
| GGGCACGGCGGCGAACTGGTCGTGGGGCAGG                     |       |       |       |                                    |                                                |
| 41878                                               | 41901 | 33060 | 42314 | CDS product large tegument protein | 41878-41901 5:02:01 GGCGGTAGAGGCCAGGCCACGG     |
| 41889                                               | 41915 | 33060 | 42314 | CDS product large tegument protein | 41889-41915 5:02:01 CCCAGGCCACGGCGCCGACCACGACC |
| 42114                                               | 42143 | 33060 | 42314 | CDS product large tegument protein | 42114-42143 7:04:01                            |
| CCCCCGCCGGGCCCCGTCCACGCCTGGCCC                      |       |       |       |                                    |                                                |
| 42164                                               | 42183 | 33060 | 42314 | CDS product large tegument protein | 42164-42183 4:01:01 GGCGTCGGCCGTCAGGGCGG       |
| 42208                                               | 42236 | 33060 | 42314 | CDS product large tegument protein | 42208-42236 6:03:01                            |
| GGCGCAGGAAGGAGAGGGAGGAGCGCAGG                       |       |       |       |                                    |                                                |
| 42288                                               | 42308 | 33060 | 42314 | CDS product large tegument protein | 42288-42308 4:01:01 CCGACGACCACCGCGTCGGCC      |
| 42371                                               | 42400 | 42352 | 45111 | CDS product tegument protein UL37  | 42371-42400 5:02:01                            |
| CCTCGGCCAGGAGCCGATCCACGGGCACCC                      |       |       |       |                                    |                                                |
| 42532                                               | 42555 | 42352 | 45111 | CDS product tegument protein UL37  | 42532-42555 6:03:01 CCCGCCTCGCCGTCGCCCCCACC    |

|                                                 |       |       |       |                                   |
|-------------------------------------------------|-------|-------|-------|-----------------------------------|
| 42603                                           | 42626 | 42352 | 45111 | CDS product tegument protein UL37 |
| 42629                                           | 42652 | 42352 | 45111 | CDS product tegument protein UL37 |
| 42756                                           | 42802 | 42352 | 45111 | CDS product tegument protein UL37 |
| GGGCCGCAGGACGGTGGCGGCCTGCAGGCGGCCGCGCGTGAGGGCGG |       |       |       |                                   |
| 42972                                           | 42991 | 42352 | 45111 | CDS product tegument protein UL37 |
| 42985                                           | 43023 | 42352 | 45111 | CDS product tegument protein UL37 |
| CCCACGGCGTCCACGACGTCCGCCAGACGCCACGTGCCC         |       |       |       |                                   |
| 43122                                           | 43144 | 42352 | 45111 | CDS product tegument protein UL37 |
| 43124                                           | 43155 | 42352 | 45111 | CDS product tegument protein UL37 |
| CCACGGCGCCCGCGGCCGTGGCCATCGAGTCC                |       |       |       |                                   |
| 43190                                           | 43204 | 42352 | 45111 | CDS product tegument protein UL37 |
| 43217                                           | 43237 | 42352 | 45111 | CDS product tegument protein UL37 |
| 43248                                           | 43265 | 42352 | 45111 | CDS product tegument protein UL37 |
| 43256                                           | 43287 | 42352 | 45111 | CDS product tegument protein UL37 |
| CCGGCGCCGGCGCCTCGAGCACCTCGGCGGCC                |       |       |       |                                   |
| 43343                                           | 43374 | 42352 | 45111 | CDS product tegument protein UL37 |
| CCACCGTCAGGTCTCGCGGCCAGCGCCGCC                  |       |       |       |                                   |
| 43463                                           | 43497 | 42352 | 45111 | CDS product tegument protein UL37 |
| GGTCCGCGCGCGGTCTAGGAGGCCGTCAGGAGG               |       |       |       |                                   |
| 43536                                           | 43569 | 42352 | 45111 | CDS product tegument protein UL37 |
| GGGCGCGAAGGACGGGTCGGCCATGGCCTCGAGG              |       |       |       |                                   |
| 43595                                           | 43614 | 42352 | 45111 | CDS product tegument protein UL37 |
| 43659                                           | 43686 | 42352 | 45111 | CDS product tegument protein UL37 |

|             |          |                            |
|-------------|----------|----------------------------|
| 42603-42626 | 5:02:01  | GGGCGTGAAGGCGGGCGGGCGG     |
| 42629-42652 | 4:01:01  | CCTGCTCCTCGCGGCCTCGGTCC    |
| 42756-42802 | 10:07:02 |                            |
| 42972-42991 | 4:01:01  | GGCGCGGAAGGCGCCACGG        |
| 42985-43023 | 6:03:01  |                            |
| 43122-43144 | 4:01:01  | GGCCACGGCGCCCGCGGCCGTGG    |
| 43124-43155 | 5:02:01  |                            |
| 43190-43204 | 4:01:01  | GGCGGCGCCGAGGG             |
| 43217-43237 | 4:01:01  | GGTCCCGAGGAAGGCGCTGG       |
| 43248-43265 | 4:01:01  | GGGCGGCGCCGCGCCGG          |
| 43256-43287 | 5:02:01  |                            |
| 43343-43374 | 6:03:01  |                            |
| 43463-43497 | 7:04:01  |                            |
| 43536-43569 | 6:03:01  |                            |
| 43595-43614 | 5:02:01  | GGTCCGCGGCGGCGCGAGG        |
| 43659-43686 | 4:01:01  | GGCGCCGTCGGCGCGAGCCCCAGCGG |

|                                              |       |       |       |                                      |                     |                             |
|----------------------------------------------|-------|-------|-------|--------------------------------------|---------------------|-----------------------------|
| 43763                                        | 43773 | 42352 | 45111 | CDS product tegument protein UL37    | 43763-43773 4:01:01 | CCGCCGCCACC                 |
| 43787                                        | 43812 | 42352 | 45111 | CDS product tegument protein UL37    | 43787-43812 4:01:01 | CCGCGCGCGCCGCGCCACGTGCTCC   |
| 43872                                        | 43895 | 42352 | 45111 | CDS product tegument protein UL37    | 43872-43895 4:01:01 | CCCCAGCGCCCGCGTCACGTCCCC    |
| 43987                                        | 44009 | 42352 | 45111 | CDS product tegument protein UL37    | 43987-44009 5:02:01 | CCGCCGACGACCGCCGTGCAGCC     |
| 44066                                        | 44082 | 42352 | 45111 | CDS product tegument protein UL37    | 44066-44082 4:01:01 | GGAGGTCGAGTGCGG             |
| 44138                                        | 44172 | 42352 | 45111 | CDS product tegument protein UL37    | 44138-44172 7:04:01 |                             |
| CCTGCACCGCTCCACACGCCCGTGGCGTCCACC            |       |       |       |                                      |                     |                             |
| 44180                                        | 44200 | 42352 | 45111 | CDS product tegument protein UL37    | 44180-44200 5:02:01 | GGTCGAGGTCCGCGGCGCGG        |
| 44213                                        | 44253 | 42352 | 45111 | CDS product tegument protein UL37    | 44213-44253 6:03:01 |                             |
| CCTGCGCCCCGGGTCCAGCAGCGCCAGCACGCCCTGGTCC     |       |       |       |                                      |                     |                             |
| 44366                                        | 44412 | 42352 | 45111 | CDS product tegument protein UL37    | 44366-44412 9:06:02 |                             |
| CCTCGCCACGGGACACGCGCCGCTCGTCCACGGCCCGCGCGCC  |       |       |       |                                      |                     |                             |
| 44437                                        | 44454 | 42352 | 45111 | CDS product tegument protein UL37    | 44437-44454 4:01:01 | GGGTTCTGGCGTCTGTGG          |
| 44747                                        | 44766 | 42352 | 45111 | CDS product tegument protein UL37    | 44747-44766 4:01:01 | GGCGGAACATGGCGTCGGGG        |
| 44793                                        | 44815 | 42352 | 45111 | CDS product tegument protein UL37    | 44793-44815 5:02:01 | GGCTCGGTGAGGGCGGCCGTGG      |
| 44889                                        | 44907 | 42352 | 45111 | CDS product tegument protein UL37    | 44889-44907 4:01:01 | CCACAGCGCCAGGCCGGCC         |
| 44900                                        | 44926 | 42352 | 45111 | CDS product tegument protein UL37    | 44900-44926 5:02:01 | GGCCGGCCAGGTTCTCGGCGAGCACGG |
| 44955                                        | 44970 | 42352 | 45111 | CDS product tegument protein UL37    | 44955-44970 4:01:01 | GGCGGGCAGGCCAGG             |
| 45063                                        | 45079 | 42352 | 45111 | CDS product tegument protein UL37    | 45063-45079 4:01:01 | GGCGACGGCGTGGTCGG           |
| 45322                                        | 45367 | 45168 | 46274 | CDS product capsid triplex subunit 1 | 45322-45367 9:06:02 |                             |
| CCACCCCGCGGACCTGGCCGGCGCCGCTACGCGGCCACGCCGCC |       |       |       |                                      |                     |                             |
| 45388                                        | 45400 | 45168 | 46274 | CDS product capsid triplex subunit 1 | 45388-45400 4:01:01 | GGAGGAGGCGTGG               |
| 45415                                        | 45441 | 45168 | 46274 | CDS product capsid triplex subunit 1 | 45415-45441 6:03:01 |                             |

|                                             |       |       |       |                                                |                                             |
|---------------------------------------------|-------|-------|-------|------------------------------------------------|---------------------------------------------|
| GGGCGGGCGCGCCTCGGCGGCGACGG                  |       |       |       |                                                |                                             |
| 45585                                       | 45614 | 45168 | 46274 | CDS product capsid triplex subunit 1           | 45585-45614 5:02:01                         |
| CCATGATCCGGAGCCACGTGTTCCCGCACCC             |       |       |       |                                                |                                             |
| 45685                                       | 45707 | 45168 | 46274 | CDS product capsid triplex subunit 1           | 45685-45707 5:02:01 GGCCCGCGGCGACCAGGAGGCGG |
| 45909                                       | 45928 | 45168 | 46274 | CDS product capsid triplex subunit 1           | 45909-45928 4:01:01 CCCTCAGCTTCCTCCTGGCC    |
| 45969                                       | 46016 | 45168 | 46274 | CDS product capsid triplex subunit 1           | 45969-46016 11:08:02                        |
| CCGACGCCCCCGCCGCGCCCGCCGCGCGCCTTCCCCGCGTACC |       |       |       |                                                |                                             |
| 46239                                       | 46259 | 45168 | 46274 | CDS product capsid triplex subunit 1           | 46239-46259 5:02:01 GGGACGTGGGGCGTGGGAGG    |
| 46622                                       | 46651 | 46605 | 48977 | CDS product ribonucleotide reductase subunit 1 | 46622-46651 9:06:02                         |
| CCCGCCGCTCCTCGTCCGCCGCCGCCCCC               |       |       |       |                                                |                                             |
| 46666                                       | 46684 | 46605 | 48977 | CDS product ribonucleotide reductase subunit 1 | 46666-46684 4:01:01                         |
| CCTCGACGCCGCTGCCCC                          |       |       |       |                                                |                                             |
| 46695                                       | 46711 | 46605 | 48977 | CDS product ribonucleotide reductase subunit 1 | 46695-46711 4:01:01                         |
| CCCGGGCCCTCGCCGCC                           |       |       |       |                                                |                                             |
| 46754                                       | 46775 | 46605 | 48977 | CDS product ribonucleotide reductase subunit 1 | 46754-46775 4:01:01                         |
| CCCGCGCCCGGCGCCTCGCGCC                      |       |       |       |                                                |                                             |
| 46894                                       | 46912 | 46605 | 48977 | CDS product ribonucleotide reductase subunit 1 | 46894-46912 4:01:01                         |
| GGCGGACCTGGACGCCTGG                         |       |       |       |                                                |                                             |
| 46900                                       | 46923 | 46605 | 48977 | CDS product ribonucleotide reductase subunit 1 | 46900-46923 4:01:01                         |
| CCTGGACGCCTGGCTCGCCTCGCC                    |       |       |       |                                                |                                             |
| 46953                                       | 46970 | 46605 | 48977 | CDS product ribonucleotide reductase subunit 1 | 46953-46970 4:01:01                         |
| CCGCCGTGCGCCGGCACCC                         |       |       |       |                                                |                                             |
| 46998                                       | 47021 | 46605 | 48977 | CDS product ribonucleotide reductase subunit 1 | 46998-47021 5:02:01                         |



|                                       |       |       |       |                                                |                     |
|---------------------------------------|-------|-------|-------|------------------------------------------------|---------------------|
| GGTTCTGGCGGGAGGCCTACCCGG              |       |       |       |                                                |                     |
| 47125                                 | 47143 | 46605 | 48977 | CDS product ribonucleotide reductase subunit 1 | 47125-47143 5:02:01 |
| CCTCGCCGCGCCGCGCGCC                   |       |       |       |                                                |                     |
| 47180                                 | 47201 | 46605 | 48977 | CDS product ribonucleotide reductase subunit 1 | 47180-47201 4:01:01 |
| GGCTCGGACGCGTGGCCCGAGG                |       |       |       |                                                |                     |
| 47305                                 | 47332 | 46605 | 48977 | CDS product ribonucleotide reductase subunit 1 | 47305-47332 6:03:01 |
| CCTGCTGAACCCCTGCCGCGCACCACC           |       |       |       |                                                |                     |
| 47367                                 | 47384 | 46605 | 48977 | CDS product ribonucleotide reductase subunit 1 | 47367-47384 4:01:01 |
| CCCCATCCTGCTGCGCC                     |       |       |       |                                                |                     |
| 47639                                 | 47672 | 46605 | 48977 | CDS product ribonucleotide reductase subunit 1 | 47639-47672 5:02:01 |
| CCGACCTGTTCTTCCAGCGCTACCAGCGGCACC     |       |       |       |                                                |                     |
| 47713                                 | 47731 | 46605 | 48977 | CDS product ribonucleotide reductase subunit 1 | 47713-47731 4:01:01 |
| CCGCGCCTCGCACCTGGCC                   |       |       |       |                                                |                     |
| 47820                                 | 47842 | 46605 | 48977 | CDS product ribonucleotide reductase subunit 1 | 47820-47842 4:01:01 |
| CCTTCCTCATCGTCCGAGCGCC                |       |       |       |                                                |                     |
| 47916                                 | 47936 | 46605 | 48977 | CDS product ribonucleotide reductase subunit 1 | 47916-47936 5:02:01 |
| CCGCCCTCGCCACGTCCAACC                 |       |       |       |                                                |                     |
| 48115                                 | 48139 | 46605 | 48977 | CDS product ribonucleotide reductase subunit 1 | 48115-48139 4:01:01 |
| GGGCGCCTCGGTCGAGGGCGTGCGG             |       |       |       |                                                |                     |
| 48190                                 | 48226 | 46605 | 48977 | CDS product ribonucleotide reductase subunit 1 | 48190-48226 7:04:01 |
| GGCGCTGGACATGGACATGGCCGACCCGGCGGCGCGG |       |       |       |                                                |                     |
| 48229                                 | 48247 | 46605 | 48977 | CDS product ribonucleotide reductase subunit 1 | 48229-48247 4:01:01 |
| CCTCAACGCCGCCATCGCC                   |       |       |       |                                                |                     |

|                                          |       |       |       |                                                |                                         |
|------------------------------------------|-------|-------|-------|------------------------------------------------|-----------------------------------------|
| 48559                                    | 48576 | 46605 | 48977 | CDS product ribonucleotide reductase subunit 1 | 48559-48576 4:01:01                     |
| CCTGCGCCCCAACCTGCC                       |       |       |       |                                                |                                         |
| 48624                                    | 48644 | 46605 | 48977 | CDS product ribonucleotide reductase subunit 1 | 48624-48644 4:01:01                     |
| GGGACGCCGTGGCGCGGCTGG                    |       |       |       |                                                |                                         |
| 48657                                    | 48680 | 46605 | 48977 | CDS product ribonucleotide reductase subunit 1 | 48657-48680 4:01:01                     |
| GGTCCGTGGCCGCGCCTTCGGGG                  |       |       |       |                                                |                                         |
| 48686                                    | 48706 | 46605 | 48977 | CDS product ribonucleotide reductase subunit 1 | 48686-48706 4:01:01                     |
| CCCGCCGGGCACCCGCTGGCC                    |       |       |       |                                                |                                         |
| 48781                                    | 48820 | 46605 | 48977 | CDS product ribonucleotide reductase subunit 1 | 48781-48820 8:05:02                     |
| CCACAGCCAGTCCATGTCCCTCTCCTGACCGAGCCCCGCC |       |       |       |                                                |                                         |
| 49132                                    | 49159 | 48987 | 49898 | CDS product ribonucleotide reductase subunit 2 | 49132-49159 6:03:01                     |
| CCGCTTCCTCTTCGCCTTCCTCTCCGCC             |       |       |       |                                                |                                         |
| 49458                                    | 49474 | 48987 | 49898 | CDS product ribonucleotide reductase subunit 2 | 49458-49474 4:01:01                     |
| CCTCCTCGTTCGCCTCC                        |       |       |       |                                                |                                         |
| 49548                                    | 49564 | 48987 | 49898 | CDS product ribonucleotide reductase subunit 2 | 49548-49564 4:01:01                     |
| CCATCCACACCTCGGCC                        |       |       |       |                                                |                                         |
| 49599                                    | 49628 | 48987 | 49898 | CDS product ribonucleotide reductase subunit 2 | 49599-49628 5:02:01                     |
| CCCCGCGCCCGACGAGGCCCGCATCCACC            |       |       |       |                                                |                                         |
| 49693                                    | 49714 | 48987 | 49898 | CDS product ribonucleotide reductase subunit 2 | 49693-49714 5:02:01                     |
| CCTCCTGCTGGACCTGCCGGCC                   |       |       |       |                                                |                                         |
| 50444                                    | 50471 | 50401 | 51498 | CDS product tegument host shutoff protein      | 50444-50471 7:04:01                     |
| GGACGGCCTGGTAGTTCGGGGCGGGGG              |       |       |       |                                                |                                         |
| 50491                                    | 50509 | 50401 | 51498 | CDS product tegument host shutoff protein      | 50491-50509 4:01:01 CCCGCCAGCTCCTTCGCCC |

|                                             |       |       |       |                                           |                                       |
|---------------------------------------------|-------|-------|-------|-------------------------------------------|---------------------------------------|
| 50765                                       | 50790 | 50401 | 51498 | CDS product tegument host shutoff protein | 50765-50790 5:02:01                   |
| CCTCGGGGGCCACCTCGGGCCCTCC                   |       |       |       |                                           |                                       |
| 50801                                       | 50833 | 50401 | 51498 | CDS product tegument host shutoff protein | 50801-50833 6:03:01                   |
| CCACCTGCTGCACCGAGTCCACGTCCGGCGCCC           |       |       |       |                                           |                                       |
| 50827                                       | 50850 | 50401 | 51498 | CDS product tegument host shutoff protein | 50827-50850 4:01:01                   |
| GGCGCCCGGTGCAGGTCCGTGTGG                    |       |       |       |                                           |                                       |
| 50867                                       | 50892 | 50401 | 51498 | CDS product tegument host shutoff protein | 50867-50892 5:02:01                   |
| CCAGGAActCCGAGTAGTCCACCCCC                  |       |       |       |                                           |                                       |
| 51015                                       | 51031 | 50401 | 51498 | CDS product tegument host shutoff protein | 51015-51031 4:01:01 GGTGTGGTAGAGGTTGG |
| 51044                                       | 51066 | 50401 | 51498 | CDS product tegument host shutoff protein | 51044-51066 5:02:01                   |
| CCGCCTCCATGTCCGACACGTCC                     |       |       |       |                                           |                                       |
| 51151                                       | 51172 | 50401 | 51498 | CDS product tegument host shutoff protein | 51151-51172 5:02:01                   |
| GGCCGCGGCGGCGCGTCGGCGG                      |       |       |       |                                           |                                       |
| 51186                                       | 51217 | 50401 | 51498 | CDS product tegument host shutoff protein | 51186-51217 5:02:01                   |
| GGCGGCACGGCCGCGGCCATGATGGCCTTGG             |       |       |       |                                           |                                       |
| 51197                                       | 51221 | 50401 | 51498 | CDS product tegument host shutoff protein | 51197-51221 4:01:01                   |
| CCGCGGCCATGATGGCCTTGGCGCC                   |       |       |       |                                           |                                       |
| 51235                                       | 51258 | 50401 | 51498 | CDS product tegument host shutoff protein | 51235-51258 4:01:01                   |
| CCGTTCCCGAAGATGCCGCGGTCC                    |       |       |       |                                           |                                       |
| 51305                                       | 51331 | 50401 | 51498 | CDS product tegument host shutoff protein | 51305-51331 5:02:01                   |
| GGCGCAGCAGGCAGCGGGCGGTCTGTGG                |       |       |       |                                           |                                       |
| 51395                                       | 51439 | 50401 | 51498 | CDS product tegument host shutoff protein | 51395-51439 8:05:02                   |
| GGTCGATGGCGATTGGCGTGAGGACCCCGCGGCGTGGAGATGG |       |       |       |                                           |                                       |

|                                                             |       |       |       |                                                 |             |          |
|-------------------------------------------------------------|-------|-------|-------|-------------------------------------------------|-------------|----------|
| 51647                                                       | 51688 | 51628 | 52782 | CDS product DNA polymerase processivity subunit | 51647-51688 | 8:05:02  |
| CCTCGAGGACCTGGACCGCCACCCACCCACGCGCACCACCC                   |       |       |       |                                                 |             |          |
| 51793                                                       | 51819 | 51628 | 52782 | CDS product DNA polymerase processivity subunit | 51793-51819 | 5:02:01  |
| CCGCCATCGCCCCGCTGGCCGCGCACC                                 |       |       |       |                                                 |             |          |
| 51998                                                       | 52013 | 51628 | 52782 | CDS product DNA polymerase processivity subunit | 51998-52013 | 4:01:01  |
| 52214                                                       | 52238 | 51628 | 52782 | CDS product DNA polymerase processivity subunit | 52214-52238 | 5:02:01  |
| CCCCCAGGTGGCCAAGCTCGCCGCC                                   |       |       |       |                                                 |             |          |
| 52241                                                       | 52262 | 51628 | 52782 | CDS product DNA polymerase processivity subunit | 52241-52262 | 4:01:01  |
| GGCGAAGGGCGCCGCGGCCGGG                                      |       |       |       |                                                 |             |          |
| 52297                                                       | 52313 | 51628 | 52782 | CDS product DNA polymerase processivity subunit | 52297-52313 | 4:01:01  |
| CCGTCTCCTCCAGCGCC                                           |       |       |       |                                                 |             |          |
| 52584                                                       | 52646 | 51628 | 52782 | CDS product DNA polymerase processivity subunit | 52584-52646 | 16:13:04 |
| CCCGCCGACCCCGCCACCGTGCCCGCCGCCCCGAGGGCGCCGCCACCGTCGCCGCCGCC |       |       |       |                                                 |             |          |
| 52663                                                       | 52676 | 51628 | 52782 | CDS product DNA polymerase processivity subunit | 52663-52676 | 5:02:01  |
| 52716                                                       | 52742 | 51628 | 52782 | CDS product DNA polymerase processivity subunit | 52716-52742 | 5:02:01  |
| CCCATCGCCAAGCGCCCGGGGCCGCC                                  |       |       |       |                                                 |             |          |
| 52735                                                       | 52756 | 51628 | 52782 | CDS product DNA polymerase processivity subunit | 52735-52756 | 5:02:01  |
| GGGCCGCCTCGGGGAAGGGG                                        |       |       |       |                                                 |             |          |
| 52852                                                       | 52866 | 52842 | 53963 | CDS product envelope protein UL43               | 52852-52866 | 4:01:01  |
| 53029                                                       | 53062 | 52842 | 53963 | CDS product envelope protein UL43               | 53029-53062 | 5:02:01  |
| CCTGCCCATGCCCTCGTGACCGGTTTCATCCCC                           |       |       |       |                                                 |             |          |
| 53227                                                       | 53240 | 52842 | 53963 | CDS product envelope protein UL43               | 53227-53240 | 4:01:01  |
| 53260                                                       | 53279 | 52842 | 53963 | CDS product envelope protein UL43               | 53260-53279 | 5:02:01  |
| GGCCTGCGGCGCGGGGGG                                          |       |       |       |                                                 |             |          |

|                                              |       |       |       |                                     |             |                                     |
|----------------------------------------------|-------|-------|-------|-------------------------------------|-------------|-------------------------------------|
| 53382                                        | 53426 | 52842 | 53963 | CDS product envelope protein UL43   | 53382-53426 | 8:05:02                             |
| CCTACGTCGCCAGCCGCGCCCGGTTCTGGCCGCGCCCGCGGACC |       |       |       |                                     |             |                                     |
| 53460                                        | 53479 | 52842 | 53963 | CDS product envelope protein UL43   | 53460-53479 | 5:02:01 CCGACCCACCGCCGAGCCC         |
| 53502                                        | 53527 | 52842 | 53963 | CDS product envelope protein UL43   | 53502-53527 | 5:02:01 CCGTCCCGCACACCCACGCCTACGCC  |
| 53562                                        | 53576 | 52842 | 53963 | CDS product envelope protein UL43   | 53562-53576 | 5:02:01 CCGCCTCCTCCCTCC             |
| 53624                                        | 53660 | 52842 | 53963 | CDS product envelope protein UL43   | 53624-53660 | 8:05:02                             |
| CCCACCACCGCGCCCGCGGCCGCGCCGGGTTCC            |       |       |       |                                     |             |                                     |
| 53635                                        | 53672 | 52842 | 53963 | CDS product envelope protein UL43   | 53635-53672 | 7:04:01                             |
| GGCCGCGCGCGCGCCCGGGTTCTGGACGCGGCGG           |       |       |       |                                     |             |                                     |
| 53740                                        | 53782 | 52842 | 53963 | CDS product envelope protein UL43   | 53740-53782 | 7:04:01                             |
| CCTCATCTCGCGGCCATCGTCTCACGGCCCGGCGAGCCC      |       |       |       |                                     |             |                                     |
| 53792                                        | 53819 | 52842 | 53963 | CDS product envelope protein UL43   | 53792-53819 | 6:03:01 CCCATCAGCCTCGCGCCTCCACCGGCC |
| 53840                                        | 53881 | 52842 | 53963 | CDS product envelope protein UL43   | 53840-53881 | 7:04:01                             |
| CCACGTCCGCTGCGCCACACCCGCGGTACCGGCTCGCCGCC    |       |       |       |                                     |             |                                     |
| 54080                                        | 54102 | 54029 | 55468 | CDS product envelope glycoprotein C | 54080-54102 | 4:01:01 CCATCGCCGCGGCGCCGTCGACC     |
| 54130                                        | 54143 | 54029 | 55468 | CDS product envelope glycoprotein C | 54130-54143 | 5:02:01 GGGGCGGCGGCGG               |
| 54169                                        | 54204 | 54029 | 55468 | CDS product envelope glycoprotein C | 54169-54204 | 9:06:02                             |
| CCCTCTCCGCCCCGACCCCCGCGCCCGCCTCGCCC          |       |       |       |                                     |             |                                     |
| 54226                                        | 54243 | 54029 | 55468 | CDS product envelope glycoprotein C | 54226-54243 | 5:02:01 CCCCCGGTCCCGCCGCCC          |
| 54354                                        | 54373 | 54029 | 55468 | CDS product envelope glycoprotein C | 54354-54373 | 5:02:01 GGCGCGGTGGGGACGCGG          |
| 54389                                        | 54414 | 54029 | 55468 | CDS product envelope glycoprotein C | 54389-54414 | 4:01:01 CCGTCTTCCCGCGCGCCGGGAGACC   |
| 54447                                        | 54468 | 54029 | 55468 | CDS product envelope glycoprotein C | 54447-54468 | 4:01:01 CCGCTCGCCCGACCCGACCCC       |
| 54484                                        | 54503 | 54029 | 55468 | CDS product envelope glycoprotein C | 54484-54503 | 4:01:01 CCCCCGCGCCCGAGCTCCC         |

|                                                                         |       |       |       |                                     |
|-------------------------------------------------------------------------|-------|-------|-------|-------------------------------------|
| 54527                                                                   | 54547 | 54029 | 55468 | CDS product envelope glycoprotein C |
| 54680                                                                   | 54708 | 54029 | 55468 | CDS product envelope glycoprotein C |
| CCGCCAACGGCACCGAGGTCCGGAGCGCC                                           |       |       |       |                                     |
| 54720                                                                   | 54738 | 54029 | 55468 | CDS product envelope glycoprotein C |
| 54866                                                                   | 54894 | 54029 | 55468 | CDS product envelope glycoprotein C |
| CCGCCTTCGTGACCAACAGCACCGTGCC                                            |       |       |       |                                     |
| 54945                                                                   | 54979 | 54029 | 55468 | CDS product envelope glycoprotein C |
| GGACGTCCCGGGCCTCGCGGCCGCGGACGCCGCGG                                     |       |       |       |                                     |
| 54951                                                                   | 54975 | 54029 | 55468 | CDS product envelope glycoprotein C |
| 55049                                                                   | 55079 | 54029 | 55468 | CDS product envelope glycoprotein C |
| CCGAGGCCCTGCGCCCCACGTCTACCACCC                                          |       |       |       |                                     |
| 55080                                                                   | 55093 | 54029 | 55468 | CDS product envelope glycoprotein C |
| 55152                                                                   | 55200 | 54029 | 55468 | CDS product envelope glycoprotein C |
| CCTCGCCTGGTCCGACCAGCCGCCGACACCGTCTACCACCTCGGCGCC                        |       |       |       |                                     |
| 55277                                                                   | 55299 | 54029 | 55468 | CDS product envelope glycoprotein C |
| 55340                                                                   | 55353 | 54029 | 55468 | CDS product envelope glycoprotein C |
| 55745                                                                   | 55786 | 55699 | 56535 | CDS product capsid scaffold protein |
| GGCAGGCCACGGCGGCCGAGCTGGCGTCGATGGTGCCGCGG                               |       |       |       |                                     |
| 55793                                                                   | 55815 | 55699 | 56535 | CDS product capsid scaffold protein |
| 55812                                                                   | 55885 | 55699 | 56535 | CDS product capsid scaffold protein |
| GGCCTGGACGGGCGGCTGGGGGCGGAGCGGGCGCGGCCGGGGCGGCGGCCTGAACGGGGCGGCCGCGGCGG |       |       |       |                                     |
| 55897                                                                   | 55948 | 55699 | 56535 | CDS product capsid scaffold protein |
| GGAGCCGAGCGGGGCGGCCGCGGCGGCGGGCACGGCCACCGGCTGGG                         |       |       |       |                                     |

|             |          |                           |
|-------------|----------|---------------------------|
| 54527-54547 | 5:02:01  | CCGCCAACGCCTCCCTCGCCC     |
| 54680-54708 | 5:02:01  |                           |
| 54720-54738 | 4:01:01  | CCTCCTGTACAGCCAGCCC       |
| 54866-54894 | 5:02:01  |                           |
| 54945-54979 | 5:02:01  |                           |
| 54951-54975 | 4:01:01  | CCCGGGCCTCGCGGCCGCGGACGCC |
| 55049-55079 | 6:03:01  |                           |
| 55080-55093 | 4:01:01  | GGCGGCGGTCTCGG            |
| 55152-55200 | 10:07:02 |                           |
| 55277-55299 | 5:02:01  | CCTGCCGCCTCGAGGGCCTGCCC   |
| 55340-55353 | 4:01:01  | CCTCCCCGCGTCC             |
| 55745-55786 | 8:05:02  |                           |
| 55793-55815 | 5:02:01  | CCGCCGGGGCCGAGACCGAGGCC   |
| 55812-55885 | 17:14:04 |                           |
| 55897-55948 | 12:09:03 |                           |

|                                                          |       |       |       |                                        |             |          |                             |
|----------------------------------------------------------|-------|-------|-------|----------------------------------------|-------------|----------|-----------------------------|
| 55937                                                    | 55962 | 55699 | 56535 | CDS product capsid scaffold protein    | 55937-55962 | 6:03:01  | CCACCGGCTGGGCCTGCACCACCACC  |
| 55963                                                    | 55989 | 55699 | 56535 | CDS product capsid scaffold protein    | 55963-55989 | 4:01:01  | GGCTGCTGCGGGACCACCTGGGCGGGG |
| 56001                                                    | 56050 | 55699 | 56535 | CDS product capsid scaffold protein    | 56001-56050 | 10:07:02 |                             |
| GGGGGCCGCCAGGCCCTGGAGGCCCGGCAGGCCCGGAGCGCCGGCACGG        |       |       |       |                                        |             |          |                             |
| 56006                                                    | 56043 | 55699 | 56535 | CDS product capsid scaffold protein    | 56006-56043 | 6:03:01  |                             |
| CCGCCAGGCCCTGGAGGCCCGGCAGGCCCGGAGCGCC                    |       |       |       |                                        |             |          |                             |
| 56061                                                    | 56075 | 55699 | 56535 | CDS product capsid scaffold protein    | 56061-56075 | 4:01:01  | GGGCGAGGGGGGCGG             |
| 56124                                                    | 56145 | 55699 | 56535 | CDS product capsid scaffold protein    | 56124-56145 | 4:01:01  | GGCTGCGTGGTGCGGGTGCGGG      |
| 56203                                                    | 56238 | 55699 | 56535 | CDS product capsid scaffold protein    | 56203-56238 | 6:03:01  |                             |
| GGCGTCGGGTAGCGGAGCTGCTGGGCGCGCAGGTGG                     |       |       |       |                                        |             |          |                             |
| 56352                                                    | 56407 | 55699 | 56535 | CDS product capsid scaffold protein    | 56352-56407 | 13:10:03 |                             |
| GGCGGGGGGCCGGGGCTCGGGCGAGGGCGAGCGGCGGTGGCGGCGGTCCATGGCGG |       |       |       |                                        |             |          |                             |
| 56429                                                    | 56457 | 55699 | 56535 | CDS product capsid scaffold protein    | 56429-56457 | 5:02:01  |                             |
| GGGACTCCAGGCTGGGCGCCGGGCGCTGG                            |       |       |       |                                        |             |          |                             |
| 56747                                                    | 56764 | 55699 | 57273 | CDS product capsid maturation protease | 56747-56764 | 4:01:01  | GGTCCGGCGACTCGGCGG          |
| 56807                                                    | 56836 | 55699 | 57273 | CDS product capsid maturation protease | 56807-56836 | 6:03:01  |                             |
| GGAACGGCGCCACGGCGGCCTCGGGCGAGG                           |       |       |       |                                        |             |          |                             |
| 56910                                                    | 56931 | 55699 | 57273 | CDS product capsid maturation protease | 56910-56931 | 4:01:01  | GGGGGCCTCGCCGGGCGCCAGG      |
| 56915                                                    | 56935 | 55699 | 57273 | CDS product capsid maturation protease | 56915-56935 | 4:01:01  | CCTCGCCGGGCGCCAGGCGCC       |
| 56940                                                    | 56961 | 55699 | 57273 | CDS product capsid maturation protease | 56940-56961 | 4:01:01  | GGACAGGGACGCCAGGGCAGG       |
| 56985                                                    | 57014 | 55699 | 57273 | CDS product capsid maturation protease | 56985-57014 | 5:02:01  |                             |
| CCGCTCCTCGTCCGAGAGCCGCATGTCCCC                           |       |       |       |                                        |             |          |                             |
| 57025                                                    | 57049 | 55699 | 57273 | CDS product capsid maturation protease | 57025-57049 | 4:01:01  |                             |

|                                          |       |       |       |                                                 |                     |
|------------------------------------------|-------|-------|-------|-------------------------------------------------|---------------------|
| GGGCCCACGGCGGGCGAGCACGG                  |       |       |       |                                                 |                     |
| 57159                                    | 57190 | 55699 | 57273 | CDS product capsid maturation protease          | 57159-57190 6:03:01 |
| GGGCAGCGGGCCCGGGGGCAGCGGCGG              |       |       |       |                                                 |                     |
| 57527                                    | 57546 | 57307 | 58911 | CDS product DNA packaging tegument protein UL25 | 57527-57546 4:01:01 |
| CCAGCGCCACCAGGCGCACC                     |       |       |       |                                                 |                     |
| 57539                                    | 57561 | 57307 | 58911 | CDS product DNA packaging tegument protein UL25 | 57539-57561 4:01:01 |
| GGCGCACCAGGTTGAGCTGGTGG                  |       |       |       |                                                 |                     |
| 57593                                    | 57614 | 57307 | 58911 | CDS product DNA packaging tegument protein UL25 | 57593-57614 4:01:01 |
| CCAGCGCCAGCGGGCCAGCCC                    |       |       |       |                                                 |                     |
| 57742                                    | 57758 | 57307 | 58911 | CDS product DNA packaging tegument protein UL25 | 57742-57758 4:01:01 |
| GGCGGCGGCGCGTTGGG                        |       |       |       |                                                 |                     |
| 57893                                    | 57936 | 57307 | 58911 | CDS product DNA packaging tegument protein UL25 | 57893-57936 9:06:02 |
| GGAAGAGGTTCTGGCCGCGGCCAGGAAGCGGCCGCGGCGG |       |       |       |                                                 |                     |
| 57941                                    | 57969 | 57307 | 58911 | CDS product DNA packaging tegument protein UL25 | 57941-57969 5:02:01 |
| CCTCGTCCACGAAGCCCGCGCCGTCGACC            |       |       |       |                                                 |                     |
| 58107                                    | 58125 | 57307 | 58911 | CDS product DNA packaging tegument protein UL25 | 58107-58125 4:01:01 |
| CCCGCCCTCGGCCAGCGCC                      |       |       |       |                                                 |                     |
| 58154                                    | 58179 | 57307 | 58911 | CDS product DNA packaging tegument protein UL25 | 58154-58179 4:01:01 |
| CCCGCTCCAGCAGGTCCGCGATGCCC               |       |       |       |                                                 |                     |
| 58183                                    | 58207 | 57307 | 58911 | CDS product DNA packaging tegument protein UL25 | 58183-58207 5:02:01 |
| GGGGCGGCGGCGCCCGGGCGCCG                  |       |       |       |                                                 |                     |
| 58195                                    | 58216 | 57307 | 58911 | CDS product DNA packaging tegument protein UL25 | 58195-58216 5:02:01 |
| CCCGCGGCGCGGCCCCCTGCC                    |       |       |       |                                                 |                     |



|                                                              |       |       |       |                                                 |             |                                   |
|--------------------------------------------------------------|-------|-------|-------|-------------------------------------------------|-------------|-----------------------------------|
| 58535                                                        | 58578 | 57307 | 58911 | CDS product DNA packaging tegument protein UL25 | 58535-58578 | 7:04:01                           |
| CCTCGCGGCCCTCGTCCGCGGCCGCGGTGCGCTCGGGCGCCTCC                 |       |       |       |                                                 |             |                                   |
| 58592                                                        | 58605 | 57307 | 58911 | CDS product DNA packaging tegument protein UL25 | 58592-58605 | 4:01:01 CCGCGTCCGCCTCC            |
| 58619                                                        | 58678 | 57307 | 58911 | CDS product DNA packaging tegument protein UL25 | 58619-58678 | 10:07:02                          |
| CCGTCTCCTCGAGCACCACGAGCGCCTCGGCCACGCGCTCCACCTGCCGCTCCAGCGGCC |       |       |       |                                                 |             |                                   |
| 58743                                                        | 58758 | 57307 | 58911 | CDS product DNA packaging tegument protein UL25 | 58743-58758 | 4:01:01 GGCGGCCGCGCGGCGG          |
| 59172                                                        | 59195 | 59004 | 59519 | CDS product nuclear protein UL24                | 59172-59195 | 7:04:01 GGGGACGCGCGCGCGAGGAGG     |
| 59260                                                        | 59276 | 59004 | 59519 | CDS product nuclear protein UL24                | 59260-59276 | 4:01:01 GGTTCGGGGGAAGCGG          |
| 59312                                                        | 59330 | 59004 | 59519 | CDS product nuclear protein UL24                | 59312-59330 | 5:02:01 CCCCACCCAGCCGACC          |
| 59441                                                        | 59459 | 59004 | 59519 | CDS product nuclear protein UL24                | 59441-59459 | 4:01:01 GGACGGGTCGCGGCGCAGG       |
| 59572                                                        | 59592 | 59512 | 60474 | CDS product thymidine kinase                    | 59572-59592 | 4:01:01 GGGTGATGGCGCTCGCGGGG      |
| 59642                                                        | 59656 | 59512 | 60474 | CDS product thymidine kinase                    | 59642-59656 | 4:01:01 GGACACGGTGGCCG            |
| 60656                                                        | 60678 | 60610 | 62670 | CDS product envelope glycoprotein H             | 60656-60678 | 4:01:01 GGGCCTCCTGGCCCTCGCGGGG    |
| 60679                                                        | 60693 | 60610 | 62670 | CDS product envelope glycoprotein H             | 60679-60693 | 4:01:01 CCGCCGCCCTCGCCC           |
| 60735                                                        | 60755 | 60610 | 62670 | CDS product envelope glycoprotein H             | 60735-60755 | 4:01:01 CCCGCGCCACCGCGGCGCCC      |
| 60819                                                        | 60831 | 60610 | 62670 | CDS product envelope glycoprotein H             | 60819-60831 | 4:01:01 GGCGGGCTGGGG              |
| 60851                                                        | 60876 | 60610 | 62670 | CDS product envelope glycoprotein H             | 60851-60876 | 4:01:01 CCGCGGCACCTGCTCGCCGGTACC  |
| 60897                                                        | 60911 | 60610 | 62670 | CDS product envelope glycoprotein H             | 60897-60911 | 4:01:01 CCCCCGCCGTCTCC            |
| 61022                                                        | 61047 | 60610 | 62670 | CDS product envelope glycoprotein H             | 61022-61047 | 7:04:01 GGCGGCGGTGTGCCCCGCGAGGTGG |
| 61199                                                        | 61228 | 60610 | 62670 | CDS product envelope glycoprotein H             | 61199-61228 | 5:02:01                           |
| GGCGCTCGGCTCGGACCTGGAGCCGCCGG                                |       |       |       |                                                 |             |                                   |
| 61214                                                        | 61248 | 60610 | 62670 | CDS product envelope glycoprotein H             | 61214-61248 | 7:04:01                           |
| CCTGGAGCCGCCGGGCCCGCGGGCCGCTTCC                              |       |       |       |                                                 |             |                                   |

|                                                 |       |       |       |                                     |
|-------------------------------------------------|-------|-------|-------|-------------------------------------|
| 61268                                           | 61290 | 60610 | 62670 | CDS product envelope glycoprotein H |
| 61352                                           | 61383 | 60610 | 62670 | CDS product envelope glycoprotein H |
| GGCGGCGCACGCGGCCGCCCTGGCCGCCGTGG                |       |       |       |                                     |
| 61366                                           | 61379 | 60610 | 62670 | CDS product envelope glycoprotein H |
| 61463                                           | 61494 | 60610 | 62670 | CDS product envelope glycoprotein H |
| CCGCGACCGGCGCGCCTCGGCGCCGGCGCTCC                |       |       |       |                                     |
| 61598                                           | 61637 | 60610 | 62670 | CDS product envelope glycoprotein H |
| CCCGGTGGCGCCCGCGGACCAGCTCCGCGCCGCTGGACC         |       |       |       |                                     |
| 61633                                           | 61665 | 60610 | 62670 | CDS product envelope glycoprotein H |
| GGACCTTCGGCGAGGACCCGGCGCCCCGGCTGG               |       |       |       |                                     |
| 61795                                           | 61823 | 60610 | 62670 | CDS product envelope glycoprotein H |
| CCCTGCTCCGCACCACGGCCATGTGCACC                   |       |       |       |                                     |
| 61834                                           | 61847 | 60610 | 62670 | CDS product envelope glycoprotein H |
| 61960                                           | 61982 | 60610 | 62670 | CDS product envelope glycoprotein H |
| 61967                                           | 61991 | 60610 | 62670 | CDS product envelope glycoprotein H |
| 62010                                           | 62064 | 60610 | 62670 | CDS product envelope glycoprotein H |
| GGGGCCCCGGGCGCGGCGGGCGGACGAGGGGGCGGAGGAGGAGGAGG |       |       |       |                                     |
| 62080                                           | 62099 | 60610 | 62670 | CDS product envelope glycoprotein H |
| 62155                                           | 62175 | 60610 | 62670 | CDS product envelope glycoprotein H |
| 62268                                           | 62287 | 60610 | 62670 | CDS product envelope glycoprotein H |
| 62410                                           | 62432 | 60610 | 62670 | CDS product envelope glycoprotein H |
| 64504                                           | 64532 | 64488 | 66065 | CDS product tegument protein UL21   |
| GGACGATGGAGATGTTGGCGCGGGTCAGG                   |       |       |       |                                     |

|             |          |                           |
|-------------|----------|---------------------------|
| 61268-61290 | 4:01:01  | CCTCTCCGACGGGGCCATGCACC   |
| 61352-61383 | 5:02:01  |                           |
| 61366-61379 | 4:01:01  | CCGCCCTGGCCGCC            |
| 61463-61494 | 5:02:01  |                           |
| 61598-61637 | 7:04:01  |                           |
| 61633-61665 | 6:03:01  |                           |
| 61795-61823 | 5:02:01  |                           |
| 61834-61847 | 4:01:01  | CCGCCGCGCCGCC             |
| 61960-61982 | 5:02:01  | CCACCCTGGCCAACCTGGGCGCC   |
| 61967-61991 | 4:01:01  | GGCCAACCTGGGCGCCGCGGCGCGG |
| 62010-62064 | 14:11:03 |                           |
| 62080-62099 | 4:01:01  | CCGCGCCCAGATCCCCGCC       |
| 62155-62175 | 4:01:01  | GGCGCCCGGACTGCGGCCCGG     |
| 62268-62287 | 4:01:01  | CCCGAGTCCCAGCACCTGCC      |
| 62410-62432 | 5:02:01  | CCGGCGCCAACCTCCACCATCCCC  |
| 64504-64532 | 5:02:01  |                           |

64555 64582 64488 66065 CDS product tegument protein UL21  
 64616 64636 64488 66065 CDS product tegument protein UL21  
 64667 64686 64488 66065 CDS product tegument protein UL21  
 64694 64727 64488 66065 CDS product tegument protein UL21  
 CCCGTCCAGCACCCGCGCCCCGCGCCTCCACC  
 64780 64812 64488 66065 CDS product tegument protein UL21  
 CCGCCAGCTCCAGGCGCGTCGCCGCTCCTCCC  
 64840 64853 64488 66065 CDS product tegument protein UL21  
 64936 64965 64488 66065 CDS product tegument protein UL21  
 GGTGACGGCGTGGGCCACGGCGCTCGCGG  
 64966 65008 64488 66065 CDS product tegument protein UL21  
 CCCGAGAGCCGCGTGGCGCCCCCTCCTCCCCCTTCTCCTCC  
 65094 65123 64488 66065 CDS product tegument protein UL21  
 GGCAGGTGCCAGCGGGCCAGGATGAACTGG  
 65230 65250 64488 66065 CDS product tegument protein UL21  
 65431 65466 64488 66065 CDS product tegument protein UL21  
 CCGCGCGCCCGCCCTTACCACCACGGCCGTGGGCC  
 65627 65669 64488 66065 CDS product tegument protein UL21  
 GGCGGGCTCGGCCAGGAGCTCCAGGACGCGGTCCTGCTGGCGG  
 65924 65952 64488 66065 CDS product tegument protein UL21  
 CCCGAAGTTCGCGATCTCCCGGAGCGCC  
 66437 66461 66172 66657 CDS product envelope protein UL20  
 66451 66475 66172 66657 CDS product envelope protein UL20

64555-64582 5:02:01 GGTACTGGGCCCCGCGGAGGGCCGCGGG  
 64616-64636 4:01:01 GGCGCAGACGGCGGACGTGGG  
 64667-64686 4:01:01 GGCGACGAGGCCCCGCGCCG  
 64694-64727 8:05:02  
  
 64780-64812 7:04:01  
  
 64840-64853 4:01:01 CCCCCGCCGGGTCC  
 64936-64965 5:02:01  
  
 64966-65008 11:08:02  
  
 65094-65123 5:02:01  
  
 65230-65250 4:01:01 CCGAGGCGCCCGCGGCCCGCC  
 65431-65466 7:04:01  
  
 65627-65669 8:05:02  
  
 65924-65952 4:01:01  
  
 66437-66461 5:02:01 GGCGGGAACGTGGCCCCGGACCG  
 66451-66475 4:01:01 CCCGGGACCGGATGCCGCTCTCGCC

|                                               |       |       |       |                                   |             |                                      |
|-----------------------------------------------|-------|-------|-------|-----------------------------------|-------------|--------------------------------------|
| 66476                                         | 66519 | 66172 | 66657 | CDS product envelope protein UL20 | 66476-66519 | 9:06:02                              |
| GGCGCAGCAGGCGGCTGGGGCTCCTGGCGGCGGCGGCTGG      |       |       |       |                                   |             |                                      |
| 66751                                         | 66765 | 66744 | 70736 | CDS product major capsid protein  | 66751-66765 | 4:01:01 CCCGGCCATCCTGCC              |
| 66922                                         | 66941 | 66744 | 70736 | CDS product major capsid protein  | 66922-66941 | 4:01:01 GGAGCTCGGGCTCTCGGTGG         |
| 67034                                         | 67054 | 66744 | 70736 | CDS product major capsid protein  | 67034-67054 | 5:02:01 CCGCACCCGGCCGACCAGCCC        |
| 67078                                         | 67105 | 66744 | 70736 | CDS product major capsid protein  | 67078-67105 | 5:02:01 CCTCGATCGCCGCTCCCTCAACGCCGCC |
| 67324                                         | 67346 | 66744 | 70736 | CDS product major capsid protein  | 67324-67346 | 4:01:01 GGGCCGGCTCGCGGACCGGTGG       |
| 67426                                         | 67457 | 66744 | 70736 | CDS product major capsid protein  | 67426-67457 | 6:03:01                              |
| GGACGCGGTCCTGGACCGGCTCTCGGACCTGG              |       |       |       |                                   |             |                                      |
| 67529                                         | 67551 | 66744 | 70736 | CDS product major capsid protein  | 67529-67551 | 4:01:01 GGGGTGCTGGTGACCACGGCCGG      |
| 67657                                         | 67676 | 66744 | 70736 | CDS product major capsid protein  | 67657-67676 | 4:01:01 GCGCTGGTGATGGGCAAGG          |
| 67792                                         | 67814 | 66744 | 70736 | CDS product major capsid protein  | 67792-67814 | 4:01:01 CCGCCTGGTGTTCCTCGAGGCCC      |
| 67907                                         | 67919 | 66744 | 70736 | CDS product major capsid protein  | 67907-67919 | 4:01:01 CCGCCGCCGACC                 |
| 67949                                         | 67971 | 66744 | 70736 | CDS product major capsid protein  | 67949-67971 | 5:02:01 CCCACGCCGGCCTCCCGGACCC       |
| 68046                                         | 68075 | 66744 | 70736 | CDS product major capsid protein  | 68046-68075 | 6:03:01                              |
| CCATGGGCACCTCTGCCACCCCTCCTTCC                 |       |       |       |                                   |             |                                      |
| 68238                                         | 68258 | 66744 | 70736 | CDS product major capsid protein  | 68238-68258 | 6:03:01 CCGCGCCGCCGGCCGCCGACC        |
| 68270                                         | 68291 | 66744 | 70736 | CDS product major capsid protein  | 68270-68291 | 4:01:01 CCCGGCAACGCCGACCTGCGCC       |
| 68341                                         | 68363 | 66744 | 70736 | CDS product major capsid protein  | 68341-68363 | 4:01:01 CCCCggGCCCTTCGCCGTGCCCC      |
| 68470                                         | 68514 | 66744 | 70736 | CDS product major capsid protein  | 68470-68514 | 9:06:02                              |
| GGACCGGCATCGGCTGGCCCCGGCCACGGTGGCCGCGGTGCGCGG |       |       |       |                                   |             |                                      |
| 68517                                         | 68539 | 66744 | 70736 | CDS product major capsid protein  | 68517-68539 | 4:01:01 CCTTCGCGACGCCAACTACCCC       |
| 69005                                         | 69017 | 66744 | 70736 | CDS product major capsid protein  | 69005-69017 | 4:01:01 GGCGGCGGCTGG                 |

|                                                         |       |       |       |                                      |
|---------------------------------------------------------|-------|-------|-------|--------------------------------------|
| 69046                                                   | 69073 | 66744 | 70736 | CDS product major capsid protein     |
| 69205                                                   | 69224 | 66744 | 70736 | CDS product major capsid protein     |
| 69229                                                   | 69265 | 66744 | 70736 | CDS product major capsid protein     |
| CCCCCGGCACCCGCTGCACCCGCGCAACCTCGTGCCC                   |       |       |       |                                      |
| 69376                                                   | 69422 | 66744 | 70736 | CDS product major capsid protein     |
| GGCCTCGGTGGCGCCGGACGCGGGCATGGCCACGGTGGCCACGCGGG         |       |       |       |                                      |
| 69471                                                   | 69490 | 66744 | 70736 | CDS product major capsid protein     |
| 69543                                                   | 69565 | 66744 | 70736 | CDS product major capsid protein     |
| 69745                                                   | 69764 | 66744 | 70736 | CDS product major capsid protein     |
| 69949                                                   | 69971 | 66744 | 70736 | CDS product major capsid protein     |
| 70021                                                   | 70042 | 66744 | 70736 | CDS product major capsid protein     |
| 70107                                                   | 70132 | 66744 | 70736 | CDS product major capsid protein     |
| 70151                                                   | 70175 | 66744 | 70736 | CDS product major capsid protein     |
| 70156                                                   | 70180 | 66744 | 70736 | CDS product major capsid protein     |
| 70271                                                   | 70294 | 66744 | 70736 | CDS product major capsid protein     |
| 70306                                                   | 70360 | 66744 | 70736 | CDS product major capsid protein     |
| CCACAGCCACGCGGACCCCGCGCACCCCAACCGCGCCACCGCCAATCCCTGGGCC |       |       |       |                                      |
| 70476                                                   | 70489 | 66744 | 70736 | CDS product major capsid protein     |
| 70509                                                   | 70521 | 66744 | 70736 | CDS product major capsid protein     |
| 70953                                                   | 70979 | 70896 | 71783 | CDS product capsid triplex subunit 2 |
| GGTGCGAGGGCCGCGTGGTGTTCCTGG                             |       |       |       |                                      |
| 71044                                                   | 71062 | 70896 | 71783 | CDS product capsid triplex subunit 2 |
| 71120                                                   | 71137 | 70896 | 71783 | CDS product capsid triplex subunit 2 |

|             |          |                              |
|-------------|----------|------------------------------|
| 69046-69073 | 5:02:01  | CCAGCCCCTGCACCCGACCCACGACGCC |
| 69205-69224 | 5:02:01  | GGACGAGGAGGTGGGCACGG         |
| 69229-69265 | 6:03:01  |                              |
| 69376-69422 | 9:06:02  |                              |
| 69471-69490 | 4:01:01  | CCTACCAGCCCAACGACGCC         |
| 69543-69565 | 5:02:01  | CCTGCGCCGACCACCTCGGCGCC      |
| 69745-69764 | 4:01:01  | CCCCGTGGCCTTCACCCACC         |
| 69949-69971 | 4:01:01  | GGACCTGGGCGTGGGCTTCACGG      |
| 70021-70042 | 4:01:01  | CCTGCCGCAGAACCTCTTCGCC       |
| 70107-70132 | 5:02:01  | CCGGCAACCGCCTGGCGCCCGTGCCC   |
| 70151-70175 | 4:01:01  | CCCCAGGTGCCCGCGGCCTGGCCC     |
| 70156-70180 | 4:01:01  | GGTGCCCGCGGCCTGGCCCGCGGG     |
| 70271-70294 | 5:02:01  | GGCGAGGTGCACGGCGAGGAGGGG     |
| 70306-70360 | 11:08:02 |                              |
| 70476-70489 | 4:01:01  | GGGGGCTGGCGCGG               |
| 70509-70521 | 4:01:01  | CCGCCGCTCGCC                 |
| 70953-70979 | 4:01:01  |                              |
| 71044-71062 | 4:01:01  | GGCCATGGCTGACCGGCGG          |
| 71120-71137 | 4:01:01  | GGCGTCGGCGGCCGCGGG           |

|                              |       |       |       |                                               |                     |                       |
|------------------------------|-------|-------|-------|-----------------------------------------------|---------------------|-----------------------|
| 71188                        | 71208 | 70896 | 71783 | CDS product capsid triplex subunit 2          | 71188-71208 4:01:01 | CCACGTGTGCCTCGTCCCGCC |
| 71302                        | 71315 | 70896 | 71783 | CDS product capsid triplex subunit 2          | 71302-71315 4:01:01 | GGCGCGGGTGGTGG        |
| 71383                        | 71411 | 70896 | 71783 | CDS product capsid triplex subunit 2          | 71383-71411 6:03:01 |                       |
| CCGGCGCTACCAGCTGCCCCGCCGCACC |       |       |       |                                               |                     |                       |
| 71518                        | 71532 | 70896 | 71783 | CDS product capsid triplex subunit 2          | 71518-71532 4:01:01 | GGGGGCGCAGGACGG       |
| 71597                        | 71621 | 70896 | 71783 | CDS product capsid triplex subunit 2          | 71597-71621 6:03:01 |                       |
| CCCCCGCCGCGCTGCCGACAGGACC    |       |       |       |                                               |                     |                       |
| 71647                        | 71662 | 70896 | 71783 | CDS product capsid triplex subunit 2          | 71647-71662 4:01:01 | GGCGCTGGAGGCCTGG      |
| 71734                        | 71752 | 70896 | 71783 | CDS product capsid triplex subunit 2          | 71734-71752 5:02:01 | CCCCCGACCGTCCCCCCC    |
| 71753                        | 71777 | 70896 | 71783 | CDS product capsid triplex subunit 2          | 71753-71777 6:03:01 |                       |
| GGCGAGAAGGCCGCGGTGGTGGAGG    |       |       |       |                                               |                     |                       |
| 72028                        | 72048 | 71979 | 77065 | CDS product DNA packaging terminase subunit 1 | 72028-72048 4:01:01 |                       |
| GGGCCACGGCGAGGTCGTCGG        |       |       |       |                                               |                     |                       |
| 72087                        | 72107 | 71979 | 77065 | CDS product DNA packaging terminase subunit 1 | 72087-72107 5:02:01 |                       |
| CCGGCCCCCGAGGCCGTCTCC        |       |       |       |                                               |                     |                       |
| 72375                        | 72398 | 71979 | 77065 | CDS product DNA packaging terminase subunit 1 | 72375-72398 4:01:01 |                       |
| CCCACGATGGCCACGGCCGAGTCC     |       |       |       |                                               |                     |                       |
| 72411                        | 72434 | 71979 | 77065 | CDS product DNA packaging terminase subunit 1 | 72411-72434 4:01:01 |                       |
| CCCTCGACGGCCACGCGACCGCC      |       |       |       |                                               |                     |                       |
| 72576                        | 72598 | 71979 | 77065 | CDS product DNA packaging terminase subunit 1 | 72576-72598 4:01:01 |                       |
| CCCACGACGGCCACGCCGGTGCC      |       |       |       |                                               |                     |                       |
| 72584                        | 72603 | 71979 | 77065 | CDS product DNA packaging terminase subunit 1 | 72584-72603 4:01:01 |                       |
| GGCCACGCCGGTGCCGAGG          |       |       |       |                                               |                     |                       |

|                                                                        |       |       |       |                                                 |                                      |
|------------------------------------------------------------------------|-------|-------|-------|-------------------------------------------------|--------------------------------------|
| 72653                                                                  | 72698 | 71979 | 77065 | CDS product DNA packaging terminase subunit 1   | 72653-72698 9:06:02                  |
| GGCCAGCAGGCGGCGTTGGCCACCGAGGAGGGCGGTAGAGCAGG                           |       |       |       |                                                 |                                      |
| 72797                                                                  | 72825 | 71979 | 77065 | CDS product DNA packaging terminase subunit 1   | 72797-72825 5:02:01                  |
| GGCCGTGGTGCGCGTGGCGGCGTCCATGG                                          |       |       |       |                                                 |                                      |
| 72863                                                                  | 72876 | 71979 | 77065 | CDS product DNA packaging terminase subunit 1   | 72863-72876 4:01:01 GGCGGTGGCGTCGG   |
| 72938                                                                  | 72993 | 71979 | 77065 | CDS product DNA packaging terminase subunit 1   | 72938-72993 11:08:02                 |
| GGTGCCCGGAGGTTGGTGAGGAAGCTGGTGCTGGCCTTGCCGGTGTGGTGGAGG                 |       |       |       |                                                 |                                      |
| 73036                                                                  | 73058 | 71979 | 77065 | CDS product DNA packaging terminase subunit 1   | 73036-73058 4:01:01                  |
| GGATGGTCTGCACGGCATCGGGG                                                |       |       |       |                                                 |                                      |
| 73239                                                                  | 73252 | 73166 | 74959 | CDS product DNA packaging tegument protein UL17 | 73239-73252 4:01:01 CCCGGACCCCCTCC   |
| 73272                                                                  | 73294 | 73166 | 74959 | CDS product DNA packaging tegument protein UL17 | 73272-73294 4:01:01                  |
| CCCGCTCGCGCCCTTCGCCGCC                                                 |       |       |       |                                                 |                                      |
| 73572                                                                  | 73599 | 73166 | 74959 | CDS product DNA packaging tegument protein UL17 | 73572-73599 5:02:01                  |
| CCTGGAGCGCCTGTGCCGCCAGTTCGCC                                           |       |       |       |                                                 |                                      |
| 73616                                                                  | 73649 | 73166 | 74959 | CDS product DNA packaging tegument protein UL17 | 73616-73649 7:04:01                  |
| GGCGCGTGGCCCCGGCGGTCGCGGCCGCGGGGGG                                     |       |       |       |                                                 |                                      |
| 73862                                                                  | 73936 | 73166 | 74959 | CDS product DNA packaging tegument protein UL17 | 73862-73936 16:13:04                 |
| GGCGCGGCGGCGGAGGAGGCGGCGGGGGCGCTCGAGGCGGCGGCGACGGTCCCGCGCCCGGCGCGCGAGG |       |       |       |                                                 |                                      |
| 73984                                                                  | 74000 | 73166 | 74959 | CDS product DNA packaging tegument protein UL17 | 73984-74000 4:01:01                  |
| CCCCAGGACCCCGGCC                                                       |       |       |       |                                                 |                                      |
| 74103                                                                  | 74118 | 73166 | 74959 | CDS product DNA packaging tegument protein UL17 | 74103-74118 4:01:01 CCGCCACTACCAGACC |
| 74162                                                                  | 74184 | 73166 | 74959 | CDS product DNA packaging tegument protein UL17 | 74162-74184 5:02:01                  |
| GGGGCGGCCGCGCGGGCCCCGG                                                 |       |       |       |                                                 |                                      |

|                                                                                                      |       |       |       |                                                 |             |          |                            |
|------------------------------------------------------------------------------------------------------|-------|-------|-------|-------------------------------------------------|-------------|----------|----------------------------|
| 74259                                                                                                | 74286 | 73166 | 74959 | CDS product DNA packaging tegument protein UL17 | 74259-74286 | 7:04:01  |                            |
| GGAGGCGCGGCGGGAGCTGGTGC GCGG                                                                         |       |       |       |                                                 |             |          |                            |
| 74405                                                                                                | 74435 | 73166 | 74959 | CDS product DNA packaging tegument protein UL17 | 74405-74435 | 5:02:01  |                            |
| CCGGCGTCCGCGAGTCCGTGCGCCGCGAGCC                                                                      |       |       |       |                                                 |             |          |                            |
| 74466                                                                                                | 74491 | 73166 | 74959 | CDS product DNA packaging tegument protein UL17 | 74466-74491 | 5:02:01  |                            |
| CCGCCCCGCGGACCGCGAGGCCGTCC                                                                           |       |       |       |                                                 |             |          |                            |
| 74556                                                                                                | 74579 | 73166 | 74959 | CDS product DNA packaging tegument protein UL17 | 74556-74579 | 4:01:01  |                            |
| GGCGCGGGAGATGGTCGACTCGGG                                                                             |       |       |       |                                                 |             |          |                            |
| 74604                                                                                                | 74625 | 73166 | 74959 | CDS product DNA packaging tegument protein UL17 | 74604-74625 | 5:02:01  |                            |
| CCTCGCCGCGCGGCCACCGCC                                                                                |       |       |       |                                                 |             |          |                            |
| 74692                                                                                                | 74746 | 73166 | 74959 | CDS product DNA packaging tegument protein UL17 | 74692-74746 | 9:06:02  |                            |
| GGCGGGGAGGTTATAAGGGTGACGCGGGCCCCGCCGGCCGTGGCAGTGGAGCCGG                                              |       |       |       |                                                 |             |          |                            |
| 74987                                                                                                | 75012 | 74986 | 75972 | CDS product tegument protein UL16               | 74987-75012 | 6:03:01  | GGAGGTGGCCGCGGCCCTGACGGAGG |
| 75089                                                                                                | 75125 | 74986 | 75972 | CDS product tegument protein UL16               | 75089-75125 | 7:04:01  |                            |
| CCTGGCCGCCGTGGCGCCCGGCGCCGCGACCGTCGCC                                                                |       |       |       |                                                 |             |          |                            |
| 75226                                                                                                | 75246 | 74986 | 75972 | CDS product tegument protein UL16               | 75226-75246 | 4:01:01  | CCGTGACCACGACCACGCTCC      |
| 75306                                                                                                | 75405 | 74986 | 75972 | CDS product tegument protein UL16               | 75306-75405 | 19:16:04 |                            |
| CCCGCCGACCTGCCCCGTCGCCGAGCCCGTCCCCGCCGCGCCGGCGGGCCGCTGGACCTGGACGCCGCCGAGCCCGTGGCCGCGGCGCCGGCGGGCCGCC |       |       |       |                                                 |             |          |                            |
| 75347                                                                                                | 75366 | 74986 | 75972 | CDS product tegument protein UL16               | 75347-75366 | 4:01:01  | GGCGGGCCGCTGGACCTGG        |
| 75383                                                                                                | 75400 | 74986 | 75972 | CDS product tegument protein UL16               | 75383-75400 | 4:01:01  | GGCCGCGGCGCCGGCGGG         |
| 75416                                                                                                | 75448 | 74986 | 75972 | CDS product tegument protein UL16               | 75416-75448 | 6:03:01  |                            |
| GGTCCTGGCCCCCGGCGCGTGGTGGGCGCGCGG                                                                    |       |       |       |                                                 |             |          |                            |
| 75515                                                                                                | 75536 | 74986 | 75972 | CDS product tegument protein UL16               | 75515-75536 | 4:01:01  | CCACCTCGGCGCCGTGCTCGCC     |



|                                                                    |       |       |       |                                               |             |                                      |
|--------------------------------------------------------------------|-------|-------|-------|-----------------------------------------------|-------------|--------------------------------------|
| 75621                                                              | 75678 | 74986 | 75972 | CDS product tegument protein UL16             | 75621-75678 | 10:07:02                             |
| CCGCACCCCGACGGGGCCGCCGCGCGTGCCTGTGCGCCGCGCGTGCCTGTGGCGCC           |       |       |       |                                               |             |                                      |
| 75673                                                              | 75693 | 74986 | 75972 | CDS product tegument protein UL16             | 75673-75693 | 4:01:01 GCGGCCAGGCGGACAAGCGGG        |
| 75849                                                              | 75876 | 74986 | 75972 | CDS product tegument protein UL16             | 75849-75876 | 6:03:01 GGCTGGCGCCTGGTGGCCCTGGACCCGG |
| 75929                                                              | 75950 | 74986 | 75972 | CDS product tegument protein UL16             | 75929-75950 | 5:02:01 CCCCCCGCCGCGCCATCCCC         |
| 76095                                                              | 76120 | 71979 | 77065 | CDS product DNA packaging terminase subunit 1 | 76095-76120 | 4:01:01                              |
| GGCACCAGCGGCGCAGGCGCGCGTGG                                         |       |       |       |                                               |             |                                      |
| 76135                                                              | 76160 | 71979 | 77065 | CDS product DNA packaging terminase subunit 1 | 76135-76160 | 4:01:01                              |
| GGGCTCCGTGGCCTTGCGGATGTGGG                                         |       |       |       |                                               |             |                                      |
| 76176                                                              | 76193 | 71979 | 77065 | CDS product DNA packaging terminase subunit 1 | 76176-76193 | 4:01:01                              |
| GGATGCCGCGGAAGGTGG                                                 |       |       |       |                                               |             |                                      |
| 76329                                                              | 76354 | 71979 | 77065 | CDS product DNA packaging terminase subunit 1 | 76329-76354 | 6:03:01                              |
| GGTAGGCGGTGGCGCGCTCGGCGTGG                                         |       |       |       |                                               |             |                                      |
| 76419                                                              | 76477 | 71979 | 77065 | CDS product DNA packaging terminase subunit 1 | 76419-76477 | 13:10:03                             |
| CCAGCGTGCCGCGCCCGCCGCCCTTTGCCCTCGCCCCGCCTCCATCGTGGCCCTCC           |       |       |       |                                               |             |                                      |
| 76502                                                              | 76572 | 71979 | 77065 | CDS product DNA packaging terminase subunit 1 | 76502-76572 | 12:09:03                             |
| CCGGGCGCGCCCTTCGCGCCCGCCGGGCCCTCTCGTCCTTCTCCTTCCCCCATCCTCCTCGTCGCC |       |       |       |                                               |             |                                      |
| 76581                                                              | 76611 | 71979 | 77065 | CDS product DNA packaging terminase subunit 1 | 76581-76611 | 8:05:02                              |
| CCCCGGGCCCCGCCGCCGCCGCCGCGTCCC                                     |       |       |       |                                               |             |                                      |
| 76614                                                              | 76640 | 71979 | 77065 | CDS product DNA packaging terminase subunit 1 | 76614-76640 | 5:02:01                              |
| GGGCGGCCGTCGCGCGTCGCGGAAGG                                         |       |       |       |                                               |             |                                      |
| 76680                                                              | 76700 | 71979 | 77065 | CDS product DNA packaging terminase subunit 1 | 76680-76700 | 5:02:01                              |
| GGAGCTGGCGGAAGCCCCGG                                               |       |       |       |                                               |             |                                      |

|                                                  |       |       |       |                                                      |                     |                            |
|--------------------------------------------------|-------|-------|-------|------------------------------------------------------|---------------------|----------------------------|
| 76716                                            | 76726 | 71979 | 77065 | CDS product DNA packaging terminase subunit 1        | 76716-76726 4:01:01 | CCACCGCCGCC                |
| 76749                                            | 76762 | 71979 | 77065 | CDS product DNA packaging terminase subunit 1        | 76749-76762 4:01:01 | GGTGAAGGCCAGG              |
| 76817                                            | 76834 | 71979 | 77065 | CDS product DNA packaging terminase subunit 1        | 76817-76834 4:01:01 |                            |
| GGGTCCACGGCGGCGCGG                               |       |       |       |                                                      |                     |                            |
| 76913                                            | 76930 | 71979 | 77065 | CDS product DNA packaging terminase subunit 1        | 76913-76930 5:02:01 |                            |
| CCGACCGCCGGGACCACC                               |       |       |       |                                                      |                     |                            |
| 76935                                            | 76958 | 71979 | 77065 | CDS product DNA packaging terminase subunit 1        | 76935-76958 5:02:01 |                            |
| GGTGGCACTGTGGGCGGCGATGG                          |       |       |       |                                                      |                     |                            |
| 77070                                            | 77099 | 77064 | 77543 | CDS product tegument protein UL14                    | 77070-77099 5:02:01 |                            |
| CCTCGGACCGCCGGGAGCGCCGCGTGCGCC                   |       |       |       |                                                      |                     |                            |
| 77193                                            | 77225 | 77064 | 77543 | CDS product tegument protein UL14                    | 77193-77225 6:03:01 |                            |
| GGGCCTTTATGGCGGCCAAACAGGCCCGGCGGG                |       |       |       |                                                      |                     |                            |
| 77244                                            | 77270 | 77064 | 77543 | CDS product tegument protein UL14                    | 77244-77270 5:02:01 | GGCTGGCCGCCCGGTGGAGTCTGTGG |
| 77293                                            | 77315 | 77064 | 77543 | CDS product tegument protein UL14                    | 77293-77315 4:01:01 | GGCCCGCGTGAAGCCCAGGCGG     |
| 77307                                            | 77330 | 77064 | 77543 | CDS product tegument protein UL14                    | 77307-77330 4:01:01 | CCCAGGCGGCCGTCCGCGGGGTCC   |
| 77324                                            | 77372 | 77064 | 77543 | CDS product tegument protein UL14                    | 77324-77372 9:06:02 |                            |
| GGGGTCCTGGACAGGCACCGGCGGTTACGCGGGCGGACTTTGCGGAGG |       |       |       |                                                      |                     |                            |
| 77401                                            | 77416 | 77064 | 77543 | CDS product tegument protein UL14                    | 77401-77416 4:01:01 | GGCCGGCGAGGACCGG           |
| 77443                                            | 77462 | 77064 | 77543 | CDS product tegument protein UL14                    | 77443-77462 5:02:01 | GGA CTGGGCCGCGGCGGGG       |
| 77473                                            | 77498 | 77064 | 77543 | CDS product tegument protein UL14                    | 77473-77498 7:04:01 | GGACGAGGGGAGGAGCGGACGAGG   |
| 77514                                            | 77537 | 77064 | 77543 | CDS product tegument protein UL14                    | 77514-77537 7:04:01 | GGCTGCTGGAGGAGCGGAGGAGG    |
| 77563                                            | 77575 | 77513 | 78709 | CDS product tegument serine/threonine protein kinase | 77563-77575 4:01:01 |                            |
| CCGCCCATCCACC                                    |       |       |       |                                                      |                     |                            |

|       |       |       |       |                                                                                                   |                     |
|-------|-------|-------|-------|---------------------------------------------------------------------------------------------------|---------------------|
| 77600 | 77613 | 77513 | 78709 | CDS product tegument serine/threonine protein kinase<br>CCATCGCCGCCGCC                            | 77600-77613 4:01:01 |
| 77614 | 77654 | 77513 | 78709 | CDS product tegument serine/threonine protein kinase<br>GGCGGCGACGGGGACGGGGACGAGGCCTCCCGGCTCCTGGG | 77614-77654 7:04:01 |
| 77639 | 77656 | 77513 | 78709 | CDS product tegument serine/threonine protein kinase<br>CCTCCCGGCTCCTGGGCC                        | 77639-77656 4:01:01 |
| 77675 | 77696 | 77513 | 78709 | CDS product tegument serine/threonine protein kinase<br>CCCCCTACCTGATCCCGCGCCC                    | 77675-77696 5:02:01 |
| 77706 | 77725 | 77513 | 78709 | CDS product tegument serine/threonine protein kinase<br>CCTCGCCGTGCCGGACGACC                      | 77706-77725 4:01:01 |
| 77763 | 77786 | 77513 | 78709 | CDS product tegument serine/threonine protein kinase<br>GGCCGTCGGGGCCGGATCGTACGG                  | 77763-77786 4:01:01 |
| 77865 | 77878 | 77513 | 78709 | CDS product tegument serine/threonine protein kinase<br>GGCCGCGGAGGAGG                            | 77865-77878 4:01:01 |
| 78201 | 78223 | 77513 | 78709 | CDS product tegument serine/threonine protein kinase<br>CCCGCGCTTCGCCTCGCGCGCC                    | 78201-78223 4:01:01 |
| 78333 | 78356 | 77513 | 78709 | CDS product tegument serine/threonine protein kinase<br>CCCGCCGCCGCCGGCCCCCTGCC                   | 78333-78356 7:04:01 |
| 78525 | 78546 | 77513 | 78709 | CDS product tegument serine/threonine protein kinase<br>CCCCTCCGCCGAGGCCCTCGCC                    | 78525-78546 5:02:01 |
| 78561 | 78578 | 77513 | 78709 | CDS product tegument serine/threonine protein kinase<br>GGAGGAGCTGGCCGCCGG                        | 78561-78578 4:01:01 |
| 78606 | 78623 | 77513 | 78709 | CDS product tegument serine/threonine protein kinase                                              | 78606-78623 4:01:01 |

|                                                     |       |       |       |                                                      |                                                     |
|-----------------------------------------------------|-------|-------|-------|------------------------------------------------------|-----------------------------------------------------|
| CCCCGGCAACCAGCCCCC                                  |       |       |       |                                                      |                                                     |
| 78654                                               | 78680 | 77513 | 78709 | CDS product tegument serine/threonine protein kinase | 78654-78680 6:03:01                                 |
| GGCCCCGTTCTGCGGCGAGGATGGCGG                         |       |       |       |                                                      |                                                     |
| 78717                                               | 78740 | 78675 | 80126 | CDS product deoxyribonuclease                        | 78717-78740 4:01:01 CCGCGCGCACCTTCCTGCGGTTCC        |
| 78763                                               | 78785 | 78675 | 80126 | CDS product deoxyribonuclease                        | 78763-78785 5:02:01 GGCCGGCGGCGGCGCGCCGCTGG         |
| 78832                                               | 78868 | 78675 | 80126 | CDS product deoxyribonuclease                        | 78832-78868 7:04:01                                 |
| CCACGGCCTCGCCGCCCCGACGCGGCCGCGCGGCC                 |       |       |       |                                                      |                                                     |
| 78856                                               | 78876 | 78675 | 80126 | CDS product deoxyribonuclease                        | 78856-78876 5:02:01 GGCCGCGGCGGCCTTTGGCGG           |
| 78883                                               | 78898 | 78675 | 80126 | CDS product deoxyribonuclease                        | 78883-78898 4:01:01 CCCGCCGCCGCGCCC                 |
| 78940                                               | 78950 | 78675 | 80126 | CDS product deoxyribonuclease                        | 78940-78950 4:01:01 GGTGGAGGCGG                     |
| 79032                                               | 79053 | 78675 | 80126 | CDS product deoxyribonuclease                        | 79032-79053 4:01:01 CCGACGGCCCGCGCTTCCCGCC          |
| 79137                                               | 79189 | 78675 | 80126 | CDS product deoxyribonuclease                        | 79137-79189 9:06:02                                 |
| CCCGCGCCCGCTCGCGGCCCTGTACGCCGAGGCGCCACGCCGGACCTGCCC |       |       |       |                                                      |                                                     |
| 79190                                               | 79235 | 78675 | 80126 | CDS product deoxyribonuclease                        | 79190-79235 9:06:02                                 |
| GGGGCGATCGGGGCGGCGACGGGGCGGGGACGGGGCGAAGGAGG        |       |       |       |                                                      |                                                     |
| 79265                                               | 79283 | 78675 | 80126 | CDS product deoxyribonuclease                        | 79265-79283 5:02:01 CCACCGCCGGGCCACGACC             |
| 79319                                               | 79349 | 78675 | 80126 | CDS product deoxyribonuclease                        | 79319-79349 5:02:01 GGCATGGTCGGGGCCTCGCTGGACCTGCTGG |
| 79525                                               | 79545 | 78675 | 80126 | CDS product deoxyribonuclease                        | 79525-79545 4:01:01 CCTGTACTCCATCGCCCGGCC           |
| 79564                                               | 79598 | 78675 | 80126 | CDS product deoxyribonuclease                        | 79564-79598 6:03:01                                 |
| GGGCGCCCCGGGCCCCGCGAGGCGCTGGCGACGG                  |       |       |       |                                                      |                                                     |
| 79611                                               | 79631 | 78675 | 80126 | CDS product deoxyribonuclease                        | 79611-79631 4:01:01 GGCGACGCGGGGCGCCGAGG            |
| 79626                                               | 79649 | 78675 | 80126 | CDS product deoxyribonuclease                        | 79626-79649 4:01:01 CCGAGGACGCCCCGCCGACGCGCC        |
| 79729                                               | 79745 | 78675 | 80126 | CDS product deoxyribonuclease                        | 79729-79745 4:01:01 GGTGGACGCGCGTCAGG               |

|                                           |       |       |       |                                                     |                                               |
|-------------------------------------------|-------|-------|-------|-----------------------------------------------------|-----------------------------------------------|
| 79861                                     | 79894 | 78675 | 80126 | CDS product deoxyribonuclease                       | 79861-79894 8:05:02                           |
| CCCCGACCGCCCCGCGCCCCACCTGGCCACC           |       |       |       |                                                     |                                               |
| 79906                                     | 79918 | 78675 | 80126 | CDS product deoxyribonuclease                       | 79906-79918 4:01:01 CCGCCGCGCCCC              |
| 79964                                     | 79984 | 78675 | 80126 | CDS product deoxyribonuclease                       | 79964-79984 5:02:01 CCGCCCGCCTGCGCCGTGCC      |
| 80020                                     | 80042 | 78675 | 80126 | CDS product deoxyribonuclease                       | 80020-80042 4:01:01 GGAGGCGTTCGAGGACCTGCGGG   |
| 80200                                     | 80230 | 80084 | 80275 | CDS product myristylated tegument protein           | 80200-80230 5:02:01                           |
| CCCGGCCCCGTGCGCCCAAGGCCCCGTACC            |       |       |       |                                                     |                                               |
| 80873                                     | 80900 | 80754 | 81935 | CDS product envelope glycoprotein M                 | 80873-80900 6:03:01 CCGCCGGGCCGTGTCGCGCCTTGTC |
| 80917                                     | 80957 | 80754 | 81935 | CDS product envelope glycoprotein M                 | 80917-80957 7:04:01                           |
| GGCTGCCCCGGGCGCGGTGGGCGATGCAGGCGGGACCAGG  |       |       |       |                                                     |                                               |
| 81202                                     | 81225 | 80754 | 81935 | CDS product envelope glycoprotein M                 | 81202-81225 5:02:01 CCAGGGCGGCCTCCGCCGTCTTCC  |
| 81272                                     | 81304 | 80754 | 81935 | CDS product envelope glycoprotein M                 | 81272-81304 7:04:01                           |
| CCCGACCACGGCCGCGCCAGGCCGACGCGCC           |       |       |       |                                                     |                                               |
| 81349                                     | 81378 | 80754 | 81935 | CDS product envelope glycoprotein M                 | 81349-81378 6:03:01                           |
| GGCGCAGCGGGGGGTGGCCGCCAGGGCGG             |       |       |       |                                                     |                                               |
| 81442                                     | 81462 | 80754 | 81935 | CDS product envelope glycoprotein M                 | 81442-81462 5:02:01 GGGTGATGTAGGCGGCGGCGG     |
| 81500                                     | 81516 | 80754 | 81935 | CDS product envelope glycoprotein M                 | 81500-81516 4:01:01 GGCTGGAGGGTCCAGG          |
| 81542                                     | 81566 | 80754 | 81935 | CDS product envelope glycoprotein M                 | 81542-81566 4:01:01 CCCCAGGGCGGCCACCGTCGACGCC |
| 81595                                     | 81638 | 80754 | 81935 | CDS product envelope glycoprotein M                 | 81595-81638 9:06:02                           |
| CCAGCCGCGCGCCTCGCGCCGAGCACCACGGCCCCGCGACC |       |       |       |                                                     |                                               |
| 82337                                     | 82350 | 81934 | 84465 | CDS product DNA replication origin-binding helicase | 82337-82350 4:01:01                           |
| CCGGCCCTACCGCC                            |       |       |       |                                                     |                                               |
| 82643                                     | 82676 | 81934 | 84465 | CDS product DNA replication origin-binding helicase | 82643-82676 6:03:01                           |

|                                                                               |       |       |       |                                                     |                                            |
|-------------------------------------------------------------------------------|-------|-------|-------|-----------------------------------------------------|--------------------------------------------|
| CCGCCGCTGCCTCGTGCTCCGGCACCTCGGGGCC                                            |       |       |       |                                                     |                                            |
| 82663                                                                         | 82751 | 81934 | 84465 | CDS product DNA replication origin-binding helicase | 82663-82751 17:14:04                       |
| GGCACCTCGGGGCCGAGGTCGCGGCGGGCGGCGGGAGGACGGCGGCGGCGACGGGAGCGAGGACGGCGCGGGCCGGG |       |       |       |                                                     |                                            |
| 82769                                                                         | 82812 | 81934 | 84465 | CDS product DNA replication origin-binding helicase | 82769-82812 13:10:03                       |
| GGCGGCGGCGACGACGGCGGTGGAGGCGGCGGGGCGGCGGGG                                    |       |       |       |                                                     |                                            |
| 84466                                                                         | 84479 | 84462 | 86513 | CDS product helicase-primase subunit                | 84466-84479 4:01:01 GGCCGCGGCGGGG          |
| 84508                                                                         | 84534 | 84462 | 86513 | CDS product helicase-primase subunit                | 84508-84534 5:02:01                        |
| GGCCTGGACGGAGCCCGGCGCGCCGGG                                                   |       |       |       |                                                     |                                            |
| 84610                                                                         | 84650 | 84462 | 86513 | CDS product helicase-primase subunit                | 84610-84650 9:06:02                        |
| GGCGGCGCCGTGGACGGGCTCGGCGGCCGCGGTGGCCGCGG                                     |       |       |       |                                                     |                                            |
| 84668                                                                         | 84728 | 84462 | 86513 | CDS product helicase-primase subunit                | 84668-84728 12:09:03                       |
| GGCACGGGGCGCTGGCGGACCCGGCGCTGTGGCGGGCGCGCACGGCGCGTCATGGCGG                    |       |       |       |                                                     |                                            |
| 84729                                                                         | 84747 | 84462 | 86513 | CDS product helicase-primase subunit                | 84729-84747 4:01:01 CCCTGCGCCGCGCCCTCCC    |
| 84820                                                                         | 84842 | 84462 | 86513 | CDS product helicase-primase subunit                | 84820-84842 6:03:01 GGCGGGCGGCGGCGCGAAGAGG |
| 84851                                                                         | 84885 | 84462 | 86513 | CDS product helicase-primase subunit                | 84851-84885 8:05:02                        |
| GGGGAGGGCGGCGAGGAGGACGAGGACGAGGCCGG                                           |       |       |       |                                                     |                                            |
| 84990                                                                         | 85015 | 84462 | 86513 | CDS product helicase-primase subunit                | 84990-85015 4:01:01                        |
| CCATGGCCGGCTGCGCCGCGCTCTCC                                                    |       |       |       |                                                     |                                            |
| 85126                                                                         | 85157 | 84462 | 86513 | CDS product helicase-primase subunit                | 85126-85157 6:03:01                        |
| GGTGCTGCGGCCCGGGCCGGCGCGTGCGG                                                 |       |       |       |                                                     |                                            |
| 85275                                                                         | 85313 | 84462 | 86513 | CDS product helicase-primase subunit                | 85275-85313 6:03:01                        |
| CCCCGCCGTCTTCGCTTCTGGGGCCGAGCTCGCCC                                           |       |       |       |                                                     |                                            |
| 85375                                                                         | 85407 | 84462 | 86513 | CDS product helicase-primase subunit                | 85375-85407 7:04:01                        |

|                                    |       |       |       |                                      |                                             |
|------------------------------------|-------|-------|-------|--------------------------------------|---------------------------------------------|
| GGTGGCCGCGCCGCGCCGAGGCGGTCCGCGG    |       |       |       |                                      |                                             |
| 85425                              | 85444 | 84462 | 86513 | CDS product helicase-primase subunit | 85425-85444 4:01:01 GGCTCACGGACGGGCTGTGG    |
| 85459                              | 85483 | 84462 | 86513 | CDS product helicase-primase subunit | 85459-85483 5:02:01                         |
| CCGCGCCTTCCACGCCCTCGGGCCC          |       |       |       |                                      |                                             |
| 85552                              | 85582 | 84462 | 86513 | CDS product helicase-primase subunit | 85552-85582 5:02:01                         |
| CCCGTGCGCCCTCCGCGGGCCTGGCTGGCC     |       |       |       |                                      |                                             |
| 85662                              | 85691 | 84462 | 86513 | CDS product helicase-primase subunit | 85662-85691 4:01:01                         |
| GGGCGCGCGCGGTCAAGCCGGCGCTCGTGG     |       |       |       |                                      |                                             |
| 85777                              | 85802 | 84462 | 86513 | CDS product helicase-primase subunit | 85777-85802 6:03:01                         |
| GGCGGCCGCGCCGAGGCCGGCCTGG          |       |       |       |                                      |                                             |
| 85782                              | 85799 | 84462 | 86513 | CDS product helicase-primase subunit | 85782-85799 4:01:01 CCGCGGCCGAGGCCGGCC      |
| 85822                              | 85845 | 84462 | 86513 | CDS product helicase-primase subunit | 85822-85845 4:01:01 GGACGGCTTCTGGGCGTGCTCGG |
| 85858                              | 85874 | 84462 | 86513 | CDS product helicase-primase subunit | 85858-85874 4:01:01 GGCCGCGCCGAGGCGG        |
| 85875                              | 85891 | 84462 | 86513 | CDS product helicase-primase subunit | 85875-85891 5:02:01 CCGCCGCGCCGCGGCC        |
| 85915                              | 85949 | 84462 | 86513 | CDS product helicase-primase subunit | 85915-85949 6:03:01                         |
| GGCCGCCGCGGCGCGGCACCTGGCCGACGCGGGG |       |       |       |                                      |                                             |
| 85998                              | 86020 | 84462 | 86513 | CDS product helicase-primase subunit | 85998-86020 5:02:01 CCCTGGCCTGGTCCTGCCACGCC |
| 86025                              | 86051 | 84462 | 86513 | CDS product helicase-primase subunit | 86025-86051 5:02:01                         |
| GGCTGCGGCGGCGAGGGCCCCGCGG          |       |       |       |                                      |                                             |
| 86086                              | 86101 | 84462 | 86513 | CDS product helicase-primase subunit | 86086-86101 4:01:01 CCGCGCCGCAAGGCC         |
| 86125                              | 86153 | 84462 | 86513 | CDS product helicase-primase subunit | 86125-86153 4:01:01                         |
| GGCCGTGAGGGCCGCGGACGCCGAGG         |       |       |       |                                      |                                             |
| 86148                              | 86167 | 84462 | 86513 | CDS product helicase-primase subunit | 86148-86167 4:01:01 CCGAGCCGCGCGCGCCGCC     |

|                                         |       |       |       |                                      |                                                |
|-----------------------------------------|-------|-------|-------|--------------------------------------|------------------------------------------------|
| 86190                                   | 86212 | 84462 | 86513 | CDS product helicase-primase subunit | 86190-86212 4:01:01 CCTTCGCCTCGCGCCACGACCCC    |
| 86238                                   | 86251 | 84462 | 86513 | CDS product helicase-primase subunit | 86238-86251 4:01:01 CCCTCGCCCCCGCC             |
| 86350                                   | 86368 | 84462 | 86513 | CDS product helicase-primase subunit | 86350-86368 4:01:01 CCCCCGCTGATCCTGCCC         |
| 86451                                   | 86469 | 84462 | 86513 | CDS product helicase-primase subunit | 86451-86469 4:01:01 CCGGCACGCCCCGCCGCC         |
| 86740                                   | 86764 | 86679 | 87479 | CDS product tegument protein UL7     | 86740-86764 4:01:01 GGACACGGCTCGGCCATCTCGGG    |
| 86888                                   | 86904 | 86679 | 87479 | CDS product tegument protein UL7     | 86888-86904 4:01:01 GGGCGGGGCCCGGGGG           |
| 86914                                   | 86938 | 86679 | 87479 | CDS product tegument protein UL7     | 86914-86938 4:01:01 GGCCTGGGCGATGGGGTAGTGGGG   |
| 87061                                   | 87074 | 86679 | 87479 | CDS product tegument protein UL7     | 87061-87074 4:01:01 CCAGCCACCGGCC              |
| 87097                                   | 87107 | 86679 | 87479 | CDS product tegument protein UL7     | 87097-87107 4:01:01 CCGCCTCCGCC                |
| 87159                                   | 87193 | 86679 | 87479 | CDS product tegument protein UL7     | 87159-87193 6:03:01                            |
| GGGTCCTCGGGCGCACCAAGGCCAGGCGGTGCGG      |       |       |       |                                      |                                                |
| 87232                                   | 87251 | 86679 | 87479 | CDS product tegument protein UL7     | 87232-87251 4:01:01 CCTCGGCGCCGTGACCACC        |
| 87268                                   | 87299 | 86679 | 87479 | CDS product tegument protein UL7     | 87268-87299 7:04:01                            |
| GGAAGCCTCCCCGGCGAGGCAGCGGCGGCGG         |       |       |       |                                      |                                                |
| 87404                                   | 87435 | 86679 | 87479 | CDS product tegument protein UL7     | 87404-87435 5:02:01                            |
| CCCGGGCACCTCGCGACCTCGCACACCAGCC         |       |       |       |                                      |                                                |
| 87608                                   | 87633 | 87370 | 89301 | CDS product capsid portal protein    | 87608-87633 5:02:01 GGCTGGTGATGAGGAAGCCGAGGTGG |
| 87884                                   | 87906 | 87370 | 89301 | CDS product capsid portal protein    | 87884-87906 5:02:01 GGCCGAGGTCCCGCGGCGGCTGG    |
| 87930                                   | 87972 | 87370 | 89301 | CDS product capsid portal protein    | 87930-87972 8:05:02                            |
| CCCCCGCGGGGCCGGCGCGCGGTCCCGTCCGCGCCCGCC |       |       |       |                                      |                                                |
| 87936                                   | 87955 | 87370 | 89301 | CDS product capsid portal protein    | 87936-87955 5:02:01 GGGGGGCCGGCGGCGCCGG        |
| 88045                                   | 88059 | 87370 | 89301 | CDS product capsid portal protein    | 88045-88059 4:01:01 CCCCCGTTGTCCGCC            |
| 88131                                   | 88144 | 87370 | 89301 | CDS product capsid portal protein    | 88131-88144 4:01:01 GGAGGTGCGGAAGG             |



|                                            |       |       |       |                                               |                     |                              |
|--------------------------------------------|-------|-------|-------|-----------------------------------------------|---------------------|------------------------------|
| 88165                                      | 88188 | 87370 | 89301 | CDS product capsid portal protein             | 88165-88188 4:01:01 | CCGGCGCCGTGGTGCCCGAAGCCC     |
| 88316                                      | 88343 | 87370 | 89301 | CDS product capsid portal protein             | 88316-88343 6:03:01 | CCGCGGCCGAGCCCGCCGGTCTCTCGCC |
| 88355                                      | 88377 | 87370 | 89301 | CDS product capsid portal protein             | 88355-88377 4:01:01 | CCACGGCGCCGGCCGGGTGCCCC      |
| 88536                                      | 88566 | 87370 | 89301 | CDS product capsid portal protein             | 88536-88566 4:01:01 |                              |
| CCAGAGCACCAGGCACTCCCCGCGCTCGCCC            |       |       |       |                                               |                     |                              |
| 88673                                      | 88695 | 87370 | 89301 | CDS product capsid portal protein             | 88673-88695 5:02:01 | CCACCTCGTCCAGGCCCTGGCCC      |
| 88758                                      | 88772 | 87370 | 89301 | CDS product capsid portal protein             | 88758-88772 4:01:01 | CCGCCGCTTCCCCC               |
| 88781                                      | 88802 | 87370 | 89301 | CDS product capsid portal protein             | 88781-88802 4:01:01 | CCCGGCGCACCGGGACCACGCC       |
| 88937                                      | 88955 | 87370 | 89301 | CDS product capsid portal protein             | 88937-88955 4:01:01 | GGCGCTCGGCCACGGCGGG          |
| 88958                                      | 89000 | 87370 | 89301 | CDS product capsid portal protein             | 88958-89000 7:04:01 |                              |
| CCTCGTCGCCAAGCGCCGCGCCAGCGCCTCGGCGCCGAGGCC |       |       |       |                                               |                     |                              |
| 89018                                      | 89040 | 87370 | 89301 | CDS product capsid portal protein             | 89018-89040 5:02:01 | CCATCCAGTCCCGGGCCACGTCC      |
| 89097                                      | 89110 | 87370 | 89301 | CDS product capsid portal protein             | 89097-89110 4:01:01 | GGCGGCCTCGGTGG               |
| 89184                                      | 89208 | 87370 | 89301 | CDS product capsid portal protein             | 89184-89208 5:02:01 | GGTGCGCGCGTGCGGTGGATGAGG     |
| 89240                                      | 89258 | 87370 | 89301 | CDS product capsid portal protein             | 89240-89258 5:02:01 | CCTCCTCCGCGGCGCCGCC          |
| 89326                                      | 89346 | 89300 | 91804 | CDS product helicase-primase helicase subunit | 89326-89346 5:02:01 |                              |
| CCGCGCGCCACCAACGCCACC                      |       |       |       |                                               |                     |                              |
| 89463                                      | 89494 | 89300 | 91804 | CDS product helicase-primase helicase subunit | 89463-89494 6:03:01 |                              |
| GGCGGACAACCCGGTGGATATAGAGGCGCTGG           |       |       |       |                                               |                     |                              |
| 89865                                      | 89899 | 89300 | 91804 | CDS product helicase-primase helicase subunit | 89865-89899 6:03:01 |                              |
| GGAGCGGCTCACGGGCGCGCGGAGCACCTGG            |       |       |       |                                               |                     |                              |
| 89961                                      | 89979 | 89300 | 91804 | CDS product helicase-primase helicase subunit | 89961-89979 4:01:01 |                              |
| GGCCGGGCTGCTCGGGCGG                        |       |       |       |                                               |                     |                              |

|                                              |       |       |       |                                               |                                                 |
|----------------------------------------------|-------|-------|-------|-----------------------------------------------|-------------------------------------------------|
| 90515                                        | 90537 | 89300 | 91804 | CDS product helicase-primase helicase subunit | 90515-90537 4:01:01                             |
| CCTTCGACCGGTACCGCGAGGCC                      |       |       |       |                                               |                                                 |
| 90578                                        | 90597 | 89300 | 91804 | CDS product helicase-primase helicase subunit | 90578-90597 4:01:01                             |
| CCAACGCCGGCCGCATCACC                         |       |       |       |                                               |                                                 |
| 90705                                        | 90727 | 89300 | 91804 | CDS product helicase-primase helicase subunit | 90705-90727 4:01:01                             |
| CCAGGTGGCCGTCACCACGCGCC                      |       |       |       |                                               |                                                 |
| 90758                                        | 90781 | 89300 | 91804 | CDS product helicase-primase helicase subunit | 90758-90781 4:01:01                             |
| CCTTCGAGGCCTTCGCGCCGTCC                      |       |       |       |                                               |                                                 |
| 90898                                        | 90940 | 89300 | 91804 | CDS product helicase-primase helicase subunit | 90898-90940 7:04:01                             |
| GGGCTGGCGCCCGAGCCGTCACGGCGCCTACCGGCGCCTGG    |       |       |       |                                               |                                                 |
| 90926                                        | 90945 | 89300 | 91804 | CDS product helicase-primase helicase subunit | 90926-90945 5:02:01                             |
| CCTACCGGCGCCTGGCCGCC                         |       |       |       |                                               |                                                 |
| 91006                                        | 91026 | 89300 | 91804 | CDS product helicase-primase helicase subunit | 91006-91026 5:02:01                             |
| CCCGCCGCCCCCGCGGGCCCC                        |       |       |       |                                               |                                                 |
| 91020                                        | 91042 | 89300 | 91804 | CDS product helicase-primase helicase subunit | 91020-91042 5:02:01                             |
| GGGCCCCGGGGGCGCGCCGGCGG                      |       |       |       |                                               |                                                 |
| 91257                                        | 91295 | 89300 | 91804 | CDS product helicase-primase helicase subunit | 91257-91295 6:03:01                             |
| GGTGCGCGGGTGCGAGGTGTTTATGGGGGGCTGCGCGG       |       |       |       |                                               |                                                 |
| 91515                                        | 91537 | 89300 | 91804 | CDS product helicase-primase helicase subunit | 91515-91537 4:01:01                             |
| GGACGACCTGGAGCTGGACATGG                      |       |       |       |                                               |                                                 |
| 91907                                        | 91933 | 91863 | 92300 | CDS product nuclear protein UL4               | 91907-91933 5:02:01 GGCGGCTGGGCGCAGTCGGGCTGTGGG |
| 92033                                        | 92077 | 91863 | 92300 | CDS product nuclear protein UL4               | 92033-92077 8:05:02                             |
| GGGCCGGTGCTCACGGTCCTGGCCGTGGACGGGAGCCGGAGCGG |       |       |       |                                               |                                                 |

|                                                                  |       |       |       |                                 |             |          |                                  |
|------------------------------------------------------------------|-------|-------|-------|---------------------------------|-------------|----------|----------------------------------|
| 92097                                                            | 92121 | 91863 | 92300 | CDS product nuclear protein UL4 | 92097-92121 | 5:02:01  | GGACCTGGCCGGCGGCCCCGAGGG         |
| 92100                                                            | 92116 | 91863 | 92300 | CDS product nuclear protein UL4 | 92100-92116 | 4:01:01  | CCTGGCCGGCGGCCCCC                |
| 92180                                                            | 92201 | 91863 | 92300 | CDS product nuclear protein UL4 | 92180-92201 | 4:01:01  | GGGCCCCGGGGCGCCTGCTGG            |
| 92235                                                            | 92254 | 91863 | 92300 | CDS product nuclear protein UL4 | 92235-92254 | 4:01:01  | CCATCACCGCGTACCGGCCC             |
| 92496                                                            | 92507 | 92476 | 93150 | CDS product protein V57         | 92496-92507 | 4:01:01  | GGAGCGGGGGG                      |
| 92516                                                            | 92586 | 92476 | 93150 | CDS product protein V57         | 92516-92586 | 14:11:03 |                                  |
| GGCCCCGGGACGGGGTCCGGGGCGCGGAGGGCGGCCGAGGGACGGCGCGCGGGCCGAGGCGTGG |       |       |       |                                 |             |          |                                  |
| 92597                                                            | 92629 | 92476 | 93150 | CDS product protein V57         | 92597-92629 | 6:03:01  | GGCGGGTCTCGGCAGCTGGGGCGTCGGGGCGG |
| 92660                                                            | 92689 | 92476 | 93150 | CDS product protein V57         | 92660-92689 | 5:02:01  | GGGGCCGGGCAGCTGGACCGCCGGGGCGG    |
| 92678                                                            | 92697 | 92476 | 93150 | CDS product protein V57         | 92678-92697 | 4:01:01  | CCGCCGGGCGGCCGTCGCC              |
| 92717                                                            | 92734 | 92476 | 93150 | CDS product protein V57         | 92717-92734 | 5:02:01  | GGCGCGCGGGGTGCGG                 |
| 92752                                                            | 92769 | 92476 | 93150 | CDS product protein V57         | 92752-92769 | 4:01:01  | CCGCCCGGCCGTCGCC                 |
| 92867                                                            | 92920 | 92476 | 93150 | CDS product protein V57         | 92867-92920 | 12:09:03 |                                  |
| GGTGGTGGTGGTGGGTAGGCTGGACGACGGTGGCGTAGACGGGGTCCGGCTCGG           |       |       |       |                                 |             |          |                                  |
| 92948                                                            | 92978 | 92476 | 93150 | CDS product protein V57         | 92948-92978 | 5:02:01  | GGGCGGTGCCAGGCCGCCGGCGCGCAGGGG   |
| 93036                                                            | 93076 | 92476 | 93150 | CDS product protein V57         | 93036-93076 | 9:06:02  |                                  |
| GGCGGAGACGCGCGGGAGGCCGCGCCAGGCGCCGGGCGG                          |       |       |       |                                 |             |          |                                  |
| 93056                                                            | 93078 | 92476 | 93150 | CDS product protein V57         | 93056-93078 | 4:01:01  | CCGCGCCAGGCGCCGGGCGGCC           |
| 93087                                                            | 93105 | 92476 | 93150 | CDS product protein V57         | 93087-93105 | 4:01:01  | GGCCTGCAGGAACCGGTGG              |
| 93249                                                            | 93279 | 93147 | 93860 | CDS product nuclear protein UL3 | 93249-93279 | 4:01:01  | GGGCGCGCGGGGCTCGCGTGGGCGTCGGG    |
| 93363                                                            | 93388 | 93147 | 93860 | CDS product nuclear protein UL3 | 93363-93388 | 4:01:01  | CCGCGCCGGGGCGCCGCGGGGCC          |
| 93410                                                            | 93467 | 93147 | 93860 | CDS product nuclear protein UL3 | 93410-93467 | 11:08:02 |                                  |
| GGACGTCTTGGTGCAGGCGACGGGAGGCCGCCAGGGCCGCGGCCAGGTCCCGGCGG         |       |       |       |                                 |             |          |                                  |

|                                                                                    |       |       |       |                                    |                                                |
|------------------------------------------------------------------------------------|-------|-------|-------|------------------------------------|------------------------------------------------|
| 93438                                                                              | 93462 | 93147 | 93860 | CDS product nuclear protein UL3    | 93438-93462 5:02:01 CCGGCCAGGGCCGCGGCCAGGTCCC  |
| 93475                                                                              | 93493 | 93147 | 93860 | CDS product nuclear protein UL3    | 93475-93493 4:01:01 CCGTCAGCCGCCGCGGCC         |
| 93558                                                                              | 93569 | 93147 | 93860 | CDS product nuclear protein UL3    | 93558-93569 4:01:01 CCCGCCGCCGCC               |
| 93578                                                                              | 93664 | 93147 | 93860 | CDS product nuclear protein UL3    | 93578-93664 16:13:04                           |
| CCCTTCGTCCCCCGTCTTCCTCGTCTCCGTCTCCTCTTCTCCGTGCGCTTCCCCTCCTCGCGTCTTCCACGTCCCCCTCTCC |       |       |       |                                    |                                                |
| 93674                                                                              | 93690 | 93147 | 93860 | CDS product nuclear protein UL3    | 93674-93690 4:01:01 CCCGAGCACCCCCTCCC          |
| 93732                                                                              | 93748 | 93147 | 93860 | CDS product nuclear protein UL3    | 93732-93748 4:01:01 GGGCGCGGCCCGGAGGG          |
| 93754                                                                              | 93774 | 93147 | 93860 | CDS product nuclear protein UL3    | 93754-93774 6:03:01 CCTCCTCCACGGCCCACCCCC      |
| 93809                                                                              | 93832 | 93147 | 93860 | CDS product nuclear protein UL3    | 93809-93832 4:01:01 GGCCGGGGCGCCGCGAGCGCGGG    |
| 93936                                                                              | 93960 | 93916 | 94866 | CDS product uracil-DNA glycosylase | 93936-93960 5:02:01 GGGGGCCCGGCCGTCTGGACGAGG   |
| 93985                                                                              | 94033 | 93916 | 94866 | CDS product uracil-DNA glycosylase | 93985-94033 8:05:02                            |
| GGGCAGGTCCTGAAGGGCGTGCGGGCCAGCGGCGACGGATGGCTGAAGG                                  |       |       |       |                                    |                                                |
| 94046                                                                              | 94069 | 93916 | 94866 | CDS product uracil-DNA glycosylase | 94046-94069 5:02:01 GGCGGCGCGGGTCCGGCGCGCAGG   |
| 94238                                                                              | 94256 | 93916 | 94866 | CDS product uracil-DNA glycosylase | 94238-94256 4:01:01 CCCAGGCCCTCCAGGCAGCC       |
| 94242                                                                              | 94281 | 93916 | 94866 | CDS product uracil-DNA glycosylase | 94242-94281 6:03:01                            |
| GGCCTCCAGGCAGCCGTGGGCGGGCGGGCAGCGTCGGG                                             |       |       |       |                                    |                                                |
| 94311                                                                              | 94331 | 93916 | 94866 | CDS product uracil-DNA glycosylase | 94311-94331 5:02:01 GGCCAGGCTCGGGGGGATCGG      |
| 94355                                                                              | 94379 | 93916 | 94866 | CDS product uracil-DNA glycosylase | 94355-94379 5:02:01 CCAGCCCGTGGGCCTGGCCCGGCC   |
| 94364                                                                              | 94395 | 93916 | 94866 | CDS product uracil-DNA glycosylase | 94364-94395 6:03:01                            |
| GGGCCTGGCCCGGCCGTGGTACGGGTCCTGG                                                    |       |       |       |                                    |                                                |
| 94406                                                                              | 94428 | 93916 | 94866 | CDS product uracil-DNA glycosylase | 94406-94428 4:01:01 CCACCTTGACGTCCTCGGGCGCC    |
| 94479                                                                              | 94504 | 93916 | 94866 | CDS product uracil-DNA glycosylase | 94479-94504 5:02:01 GGTCAGGCAGCGGCCGCGGTACTCGG |
| 94602                                                                              | 94648 | 93916 | 94866 | CDS product uracil-DNA glycosylase | 94602-94648 9:06:02                            |

|                                                                           |       |       |        |                                           |                                              |
|---------------------------------------------------------------------------|-------|-------|--------|-------------------------------------------|----------------------------------------------|
| GGGCGCCCCGGGTCGGGGGGCGGGCGGAGGCGTCGGCCCCGTGG                              |       |       |        |                                           |                                              |
| 94686                                                                     | 94729 | 93916 | 94866  | CDS product uracil-DNA glycosylase        | 94686-94729 10:07:02                         |
| GGGCCGGGCGGCGGCGAGGGTCGGGCCGGCTTCGAGGCCCGG                                |       |       |        |                                           |                                              |
| 94761                                                                     | 94802 | 93916 | 94866  | CDS product uracil-DNA glycosylase        | 94761-94802 10:07:02                         |
| GGCGGTGGCGGCTTAGAGGCAGAAGCGGCGGCGGCGGCAGG                                 |       |       |        |                                           |                                              |
| 94821                                                                     | 94838 | 93916 | 94866  | CDS product uracil-DNA glycosylase        | 94821-94838 4:01:01 GGGCGGCAGGCCGCAGGG       |
| 94902                                                                     | 94930 | 94844 | 95314  | CDS product envelope glycoprotein L       | 94902-94930 6:03:01                          |
| CCACCTCTCCGAGCTCCTTCAGGGCCGCC                                             |       |       |        |                                           |                                              |
| 94951                                                                     | 94994 | 94844 | 95314  | CDS product envelope glycoprotein L       | 94951-94994 8:05:02                          |
| GGCCAGGGCCTGGATGGCGACAAAGGGTTGACCAGGTAGGCGG                               |       |       |        |                                           |                                              |
| 95154                                                                     | 95174 | 94844 | 95314  | CDS product envelope glycoprotein L       | 95154-95174 4:01:01 CCCATTCCAGCTCCTCGCGCC    |
| 95175                                                                     | 95211 | 94844 | 95314  | CDS product envelope glycoprotein L       | 95175-95211 7:04:01                          |
| GGGGAGCGCGGTGGGGGGCGGGCGGTGACCGGCGG                                       |       |       |        |                                           |                                              |
| 95243                                                                     | 95278 | 94844 | 95314  | CDS product envelope glycoprotein L       | 95243-95278 7:04:01                          |
| CCCGCGACGCCGGTGCCAGGAACCCCCAGCGCCGCC                                      |       |       |        |                                           |                                              |
| 96146                                                                     | 96219 | 96112 | 109118 | misc_RNA product large latency transcript | 96146-96219 14:11:03                         |
| CCATCTCGCCAGCCAGCCAACCAGCCGAGCCGCCAGCCGACCCGAGAGCCCCGAGAGCCAGACTCCCTCAGCC |       |       |        |                                           |                                              |
| 97208                                                                     | 97231 | 96481 | 97584  | CDS product ubiquitin E3 ligase ICPO      | 97208-97231 4:01:01 CCGTCGAGACCTGCCCATAAAGCC |
| 97266                                                                     | 97296 | 96481 | 97584  | CDS product ubiquitin E3 ligase ICPO      | 97266-97296 6:03:01                          |
| CCCAGACCCGGAGCCCTGCCCTTCGGCCTCC                                           |       |       |        |                                           |                                              |
| 97327                                                                     | 97373 | 96481 | 97584  | CDS product ubiquitin E3 ligase ICPO      | 97327-97373 8:05:02                          |
| CCCCAGATGACCGGAAGCCCCCCCCTACCGGCTCATCCTCTTCCCC                            |       |       |        |                                           |                                              |
| 97382                                                                     | 97395 | 96481 | 97584  | CDS product ubiquitin E3 ligase ICPO      | 97382-97395 4:01:01 CCGTCGCCCCCTCC           |

|        |        |        |        |                                                                                       |               |          |                          |
|--------|--------|--------|--------|---------------------------------------------------------------------------------------|---------------|----------|--------------------------|
| 97433  | 97456  | 96481  | 97584  | CDS product ubiquitin E3 ligase ICP0                                                  | 97433-97456   | 6:03:01  | GGTGGAGGATGGAGGTGACGCGGG |
| 103175 | 103207 | 103171 | 107511 | CDS product transcriptional regulator ICP4                                            | 103175-103207 | 5:02:01  |                          |
|        |        |        |        | GGAGCAGCAGGTAGGGTTGCCGGCGTCCTCGG                                                      |               |          |                          |
| 103195 | 103236 | 103171 | 107511 | CDS product transcriptional regulator ICP4                                            | 103195-103236 | 8:05:02  |                          |
|        |        |        |        | CCGGCGTCCTCGGCCTCCTCGTCGTCGAGATGGCCTCCACC                                             |               |          |                          |
| 103242 | 103266 | 103171 | 107511 | CDS product transcriptional regulator ICP4                                            | 103242-103266 | 4:01:01  |                          |
|        |        |        |        | GGGCCCCGAGCGGGCCGCGGGGCGGG                                                            |               |          |                          |
| 103245 | 103286 | 103171 | 107511 | CDS product transcriptional regulator ICP4                                            | 103245-103286 | 7:04:01  |                          |
|        |        |        |        | CCCAGCGGGCCGCGGGGCCGGCGTCGCCGCCGCGGACGCC                                              |               |          |                          |
| 103295 | 103351 | 103171 | 107511 | CDS product transcriptional regulator ICP4                                            | 103295-103351 | 10:07:02 |                          |
|        |        |        |        | CCACAGAGTCCCCGTCTCGCCGGGGCCGGCCCCGGCGCCGAGCCCCCGCGGGCC                                |               |          |                          |
| 103317 | 103405 | 103171 | 107511 | CDS product transcriptional regulator ICP4                                            | 103317-103405 | 15:12:03 |                          |
|        |        |        |        | GGGGCCGGCCCCGGCGCCCGAGGCCCCCGGGGCCGGTGGGTCTCCACGGCGCCCCGGCGGGCGCGGACGCTGGTCTCGAAGGGGG |               |          |                          |
| 103422 | 103459 | 103171 | 107511 | CDS product transcriptional regulator ICP4                                            | 103422-103459 | 7:04:01  |                          |
|        |        |        |        | GGCCGGCGGGGCGCCCGCGGCGGCGACGGCGCCCGGGG                                                |               |          |                          |
| 103471 | 103490 | 103171 | 107511 | CDS product transcriptional regulator ICP4                                            | 103471-103490 | 4:01:01  |                          |
|        |        |        |        | GGGGCGGCCTCGGCGTCGGG                                                                  |               |          |                          |
| 103527 | 103579 | 103171 | 107511 | CDS product transcriptional regulator ICP4                                            | 103527-103579 | 10:07:02 |                          |
|        |        |        |        | GGCCGGCAGGCCCTCGGGCCGCGGAGCTCGGCGAGGCCCCGGCGGCCGAGG                                   |               |          |                          |
| 103697 | 103716 | 103171 | 107511 | CDS product transcriptional regulator ICP4                                            | 103697-103716 | 4:01:01  |                          |
|        |        |        |        | CCATGTCCTTGCAGCCGTCC                                                                  |               |          |                          |
| 103736 | 103786 | 103171 | 107511 | CDS product transcriptional regulator ICP4                                            | 103736-103786 | 10:07:02 |                          |
|        |        |        |        | GGCGGTAGGCGCGCGGCGGCAGCGGGACCGGGTCCGGGGCCCGCGCGGG                                     |               |          |                          |

|        |        |        |        |                                                                                                  |               |          |
|--------|--------|--------|--------|--------------------------------------------------------------------------------------------------|---------------|----------|
| 103814 | 103864 | 103171 | 107511 | CDS product transcriptional regulator ICP4<br>GGCGGCAGAGGCGCAGCGGCTCGGCCCGGGGTGCAGGCGGGCGAAGGAGG | 103814-103864 | 10:07:02 |
| 103917 | 103943 | 103171 | 107511 | CDS product transcriptional regulator ICP4<br>GGCCGCGCGGAGCTCGCGGCACCCGGG                        | 103917-103943 | 4:01:01  |
| 103953 | 103986 | 103171 | 107511 | CDS product transcriptional regulator ICP4<br>GGCGCACTGGGCGGCCGGGTCCAGGCGGACGCGG                 | 103953-103986 | 7:04:01  |
| 104003 | 104034 | 103171 | 107511 | CDS product transcriptional regulator ICP4<br>CCCCACGGCCGGGCGGTCCGCGGGCCAGTCC                    | 104003-104034 | 7:04:01  |
| 104058 | 104080 | 103171 | 107511 | CDS product transcriptional regulator ICP4<br>CCGGCGCCGCGCCGCGCCGAGCC                            | 104058-104080 | 5:02:01  |
| 104096 | 104127 | 103171 | 107511 | CDS product transcriptional regulator ICP4<br>CCACGGCGCCGCGGAAGCCGAGGTCCCGCGCC                   | 104096-104127 | 5:02:01  |
| 104175 | 104194 | 103171 | 107511 | CDS product transcriptional regulator ICP4<br>CCCGGTCCAGTTCCCGGCC                                | 104175-104194 | 4:01:01  |
| 104219 | 104236 | 103171 | 107511 | CDS product transcriptional regulator ICP4<br>GGCGGTGGGCGAAGGCGG                                 | 104219-104236 | 5:02:01  |
| 104252 | 104305 | 103171 | 107511 | CDS product transcriptional regulator ICP4<br>GGCCGCCGCGGCGGGTCCCAGGCCGGGCGGGGCGCCCTCGGCGGGCTCGG | 104252-104305 | 9:06:02  |
| 104385 | 104422 | 103171 | 107511 | CDS product transcriptional regulator ICP4<br>GGCGGCGCGGCGGCGAGCGGGGCGCCGCGGCGCGCGG              | 104385-104422 | 8:05:02  |
| 104435 | 104452 | 103171 | 107511 | CDS product transcriptional regulator ICP4<br>GGGCGGCCGGGTCTGAAGG                                | 104435-104452 | 4:01:01  |
| 104489 | 104586 | 103171 | 107511 | CDS product transcriptional regulator ICP4                                                       | 104489-104586 | 16:13:04 |

GGTCCACGAGGGCGCGGGCCACCTCGGGCGGGCAGTAGGCGGCGAGGGCCGCTCGGAGGGCCGCGGCGTGTGGGTCTCGCCGGCCGGGACGCGGCGG

104598 104643 103171 107511 CDS product transcriptional regulator ICP4 104598-104643 7:04:01  
GGGCGCGGGTGCTCGGGCATGGGCCGAGCGGGCGCCGAGCCGG

104652 104671 103171 107511 CDS product transcriptional regulator ICP4 104652-104671 7:04:01  
GGAGGAGGAGGAGGAGGAGG

104682 104702 103171 107511 CDS product transcriptional regulator ICP4 104682-104702 4:01:01  
GGGAGCGGGGTCCGGAGCGGG

104730 104745 103171 107511 CDS product transcriptional regulator ICP4 104730-104745 4:01:01 CCGGGCCCCCGGTCC

104786 104822 103171 107511 CDS product transcriptional regulator ICP4 104786-104822 7:04:01  
CCGCGCCGAGAGCCCCTCGTCCTCCTCGCCGTCCC

104823 104847 103171 107511 CDS product transcriptional regulator ICP4 104823-104847 5:02:01  
GGGGCGGCGGGCCCCGGGCGCGCGG

104868 105016 103171 107511 CDS product transcriptional regulator ICP4 104868-105016 30:27:07  
GGGCGCTGGGTCCGGGCCGGCGGGGGAGCTGGCGTAGCCGAGGAGCCGGAGAGGCCGGACTTGGTGCTGGAGCTGGACTTGGTGCTGGAGCTGGACTTGGTGCTGGCGGGGCTGGAGGGCCCGG  
AGCCGGGGAGGCCGGAGGGGG

105019 105036 103171 107511 CDS product transcriptional regulator ICP4 105019-105036 5:02:01  
CCCGCCCGCCGGCGCC

105031 105202 103171 107511 CDS product transcriptional regulator ICP4 105031-105202 27:24:06  
GGCGCCGCGCTGGGACGACGAGGCCGGGTGCTCGGGCCAGAGCGGGGCAGGCCGGGCGGGGCTCCGCGGGCCGGCGCGGCGGCCCTCGGCGAGCCGGGCCGGGCCACGTTGCCGGGGC  
GAAGAGGGCCGCGGCGTAGGTCCAGGCGGCCTCGCGGGCGCGGG

105132 105153 103171 107511 CDS product transcriptional regulator ICP4 105132-105153 4:01:01  
CCGGGCCGCGGCCACGTTGGCC

105229 105253 103171 107511 CDS product transcriptional regulator ICP4 105229-105253 4:01:01



|                                                                                               |               |          |
|-----------------------------------------------------------------------------------------------|---------------|----------|
| GGCGCCACGGTGCGGGCGACGAGGG                                                                     |               |          |
| 105263 105296 103171 107511 CDS product transcriptional regulator ICP4                        | 105263-105296 | 7:04:01  |
| CCGCGGCCTGCCGCCGCTCGGCCGGGCCGGCCCC                                                            |               |          |
| 105282 105300 103171 107511 CDS product transcriptional regulator ICP4                        | 105282-105300 | 4:01:01  |
| GGCCGGGCCGGCCCCGGGG                                                                           |               |          |
| 105344 105445 103171 107511 CDS product transcriptional regulator ICP4                        | 105344-105445 | 18:15:04 |
| GGCAGGCGGGCCCGAGGGCGGCCGGGGCGCGGGCGGGCAGCCGAGCGGGCAGGGCAGCAGGCGCTCGAGGACGCCGGCAGGCCAGGACGCAGG |               |          |
| 105461 105526 103171 107511 CDS product transcriptional regulator ICP4                        | 105461-105526 | 11:08:02 |
| GGGGCACGCGGCCGGGCTGCGCGCGGCGAAGGCGGCGGACGCGGGCGCAGAGGGCCTCGACGG                               |               |          |
| 105537 105619 103171 107511 CDS product transcriptional regulator ICP4                        | 105537-105619 | 15:12:03 |
| GGCGCGGGGGTCCGCGCGCGGCCCGGTAGGCCATGTGCGCGTAGGCCCCGGCGGAGGCTCTGCAGGATGAAGGTCTTCTGGG            |               |          |
| 105632 105649 103171 107511 CDS product transcriptional regulator ICP4                        | 105632-105649 | 4:01:01  |
| GGCGGCTCATGGCCACGG                                                                            |               |          |
| 105679 105697 103171 107511 CDS product transcriptional regulator ICP4                        | 105679-105697 | 4:01:01  |
| GGGTCCTGGGCGGCCATGG                                                                           |               |          |
| 105735 105789 103171 107511 CDS product transcriptional regulator ICP4                        | 105735-105789 | 8:05:02  |
| GGTGATGAAGGAGCCGTGGCCGTGGGGCGCGTGGACCCGGCGCTGGCAGAACTGG                                       |               |          |
| 105834 105853 103171 107511 CDS product transcriptional regulator ICP4                        | 105834-105853 | 4:01:01  |
| GGACATGGCCTCGCCGGCGG                                                                          |               |          |
| 105894 105912 103171 107511 CDS product transcriptional regulator ICP4                        | 105894-105912 | 4:01:01  |
| CCTCGAGTCCCCATCTCC                                                                            |               |          |
| 105924 105969 103171 107511 CDS product transcriptional regulator ICP4                        | 105924-105969 | 9:06:02  |
| GGGCACGGGCCCGGCCGCGCGGTAGCGGGCCGCGCCTGGCGG                                                    |               |          |

|                                                                                                                 |        |        |        |                                            |               |          |                 |
|-----------------------------------------------------------------------------------------------------------------|--------|--------|--------|--------------------------------------------|---------------|----------|-----------------|
| 106022                                                                                                          | 106061 | 103171 | 107511 | CDS product transcriptional regulator ICP4 | 106022-106061 | 8:05:02  |                 |
| GGACGCGCCGTCGGCCGAGGGTCGGAGCCGGCCAGGG                                                                           |        |        |        |                                            |               |          |                 |
| 106084                                                                                                          | 106111 | 103171 | 107511 | CDS product transcriptional regulator ICP4 | 106084-106111 | 6:03:01  |                 |
| GGCCCGTCGGTCGGCGGGGCCCCGTCGG                                                                                    |        |        |        |                                            |               |          |                 |
| 106124                                                                                                          | 106143 | 103171 | 107511 | CDS product transcriptional regulator ICP4 | 106124-106143 | 5:02:01  |                 |
| GGTGGTTGTTGGTGGAGCGG                                                                                            |        |        |        |                                            |               |          |                 |
| 106156                                                                                                          | 106296 | 103171 | 107511 | CDS product transcriptional regulator ICP4 | 106156-106296 | 30:27:07 |                 |
| GGGGCCGGGCGGGTCCGGGGCCGGGGCCGGGAGGCCGCGGAGGAGGCGGAGGAGCCGAGGGCCGCGGGCCGCGGGCGCCGCGGAGACGGTGGCGGCCCGGCGGGCGAGTGG |        |        |        |                                            |               |          |                 |
| GGCGCCGGGCGCGG                                                                                                  |        |        |        |                                            |               |          |                 |
| 106172                                                                                                          | 106194 | 103171 | 107511 | CDS product transcriptional regulator ICP4 | 106172-106194 | 4:01:01  |                 |
| CCGGGGCCGGGGCCGGGAGGCC                                                                                          |        |        |        |                                            |               |          |                 |
| 106320                                                                                                          | 106378 | 103171 | 107511 | CDS product transcriptional regulator ICP4 | 106320-106378 | 14:11:03 |                 |
| GGAGGAGGACGAGGACGAGGAGGACGAGGAGGACGAGGAGGACGAGGACGAGGAGGAGG                                                     |        |        |        |                                            |               |          |                 |
| 106392                                                                                                          | 106440 | 103171 | 107511 | CDS product transcriptional regulator ICP4 | 106392-106440 | 12:09:03 |                 |
| GGCGGCGGCGGGGCCCCGGGGGCGGAGGGCGAGCGGGCCGGGAGAGG                                                                 |        |        |        |                                            |               |          |                 |
| 106481                                                                                                          | 106495 | 103171 | 107511 | CDS product transcriptional regulator ICP4 | 106481-106495 | 4:01:01  | GGCCGCGGCGGAGGG |
| 106506                                                                                                          | 106523 | 103171 | 107511 | CDS product transcriptional regulator ICP4 | 106506-106523 | 4:01:01  |                 |
| GGCGGCGCGCGGCGGGG                                                                                               |        |        |        |                                            |               |          |                 |
| 106541                                                                                                          | 106578 | 103171 | 107511 | CDS product transcriptional regulator ICP4 | 106541-106578 | 7:04:01  |                 |
| CCCCCGCGTCCCCGGCGAGGCCGAGTCCGTCCTCGTCC                                                                          |        |        |        |                                            |               |          |                 |
| 106584                                                                                                          | 106666 | 103171 | 107511 | CDS product transcriptional regulator ICP4 | 106584-106666 | 15:12:03 |                 |
| GGGGCCGCGGGCGACGGTCTCGACGGCGACGGTGGTGGTGGAGTTGGAGTTGGAGTTGGGGTTGGAGGAGACGGGGCTCCGGG                             |        |        |        |                                            |               |          |                 |
| 106718                                                                                                          | 106740 | 103171 | 107511 | CDS product transcriptional regulator ICP4 | 106718-106740 | 4:01:01  |                 |

|                                                                        |               |                       |
|------------------------------------------------------------------------|---------------|-----------------------|
| GGGGCTCGCGGTGCTGGTGATGG                                                |               |                       |
| 106761 106771 103171 107511 CDS product transcriptional regulator ICP4 | 106761-106771 | 4:01:01 GGCGGAGGGGG   |
| 106774 106802 103171 107511 CDS product transcriptional regulator ICP4 | 106774-106802 | 7:04:01               |
| CCGCCGCCGCCGGGCGCGAGACCGGCC                                            |               |                       |
| 106798 106829 103171 107511 CDS product transcriptional regulator ICP4 | 106798-106829 | 8:05:02               |
| GGCCCCGGCGGGGGAGGCTGGGGAAGCGGG                                         |               |                       |
| 106830 106842 103171 107511 CDS product transcriptional regulator ICP4 | 106830-106842 | 4:01:01 CCCCCCGCGTGCC |
| 106864 106892 103171 107511 CDS product transcriptional regulator ICP4 | 106864-106892 | 5:02:01               |
| GGCTGTGCTGGTGGCGCCGGGTCCGAGG                                           |               |                       |
| 106880 106930 103171 107511 CDS product transcriptional regulator ICP4 | 106880-106930 | 10:07:02              |
| CCGGGGTCCGAGGCCGCGCGCCGGCCGGGCTCACCGACCGGTCCCCC                        |               |                       |
| 106951 107008 103171 107511 CDS product transcriptional regulator ICP4 | 106951-107008 | 12:09:03              |
| GGGGCTGCCGAGGGCCGGGAGAGCCGAGGAGGAGCCGGGAGGCTGCGGAGGGGG                 |               |                       |
| 107016 107046 103171 107511 CDS product transcriptional regulator ICP4 | 107016-107046 | 6:03:01               |
| CCCGGGCCGCCGGGGGCCCGGCTCTGCC                                           |               |                       |
| 107019 107038 103171 107511 CDS product transcriptional regulator ICP4 | 107019-107038 | 4:01:01               |
| GGGGCCGCCGGGGGCCCGG                                                    |               |                       |
| 107062 107115 103171 107511 CDS product transcriptional regulator ICP4 | 107062-107115 | 10:07:02              |
| GGGGTCGGCGCCGGGGCCCGGAGCCGGCCGGGACCGGGCCCGAGGACGAGG                    |               |                       |
| 107073 107105 103171 107511 CDS product transcriptional regulator ICP4 | 107073-107105 | 6:03:01               |
| CCGGGGCCCGGAGCCGGCCGGGACCGGGGCC                                        |               |                       |
| 107144 107174 103171 107511 CDS product transcriptional regulator ICP4 | 107144-107174 | 5:02:01               |
| CCCGACCGGGGACCCGGCGCGGGGACCC                                           |               |                       |

|                                                                                                        |        |        |        |          |         |                                |               |          |
|--------------------------------------------------------------------------------------------------------|--------|--------|--------|----------|---------|--------------------------------|---------------|----------|
| 107151                                                                                                 | 107177 | 103171 | 107511 | CDS      | product | transcriptional regulator ICP4 | 107151-107177 | 6:03:01  |
| GGGGGACCCGGCGCCGGGACCCGGG                                                                              |        |        |        |          |         |                                |               |          |
| 107252                                                                                                 | 107358 | 103171 | 107511 | CDS      | product | transcriptional regulator ICP4 | 107252-107358 | 18:15:04 |
| GGGCCGAAGGAGGACGGGGCGCCTCGTGGCTCCGGCCGCGCCGCGAGGACGGCGCCTCGGCCTCGGCGGCGTCGTCGGAGAAGAGGCCGCCGGCCGAAGAGG |        |        |        |          |         |                                |               |          |
| 107363                                                                                                 | 107414 | 103171 | 107511 | CDS      | product | transcriptional regulator ICP4 | 107363-107414 | 8:05:02  |
| CCTCGCCGGAGGAGCCGCGGCGCCGGGAGCCCTGGCTGCCGCCGTCGGGGCC                                                   |        |        |        |          |         |                                |               |          |
| 107370                                                                                                 | 107397 | 103171 | 107511 | CDS      | product | transcriptional regulator ICP4 | 107370-107397 | 5:02:01  |
| GGAGGAGCCGCGGCGCCGGGAGCCCTGG                                                                           |        |        |        |          |         |                                |               |          |
| 107436                                                                                                 | 107463 | 103171 | 107511 | CDS      | product | transcriptional regulator ICP4 | 107436-107463 | 6:03:01  |
| GGCCGCGGCGGCGCCGCCAGGAGCTGG                                                                            |        |        |        |          |         |                                |               |          |
| 107938                                                                                                 | 107957 | 96112  | 109118 | misc_RNA | product | large latency transcript       | 107938-107957 | 4:01:01  |
| GGCGGCCCGCGCCAATGGG                                                                                    |        |        |        |          |         |                                |               |          |
| 107996                                                                                                 | 108024 | 96112  | 109118 | misc_RNA | product | large latency transcript       | 107996-108024 | 5:02:01  |
| CCCGCCCCCGCGGCGGCATCTTGCCCC                                                                            |        |        |        |          |         |                                |               |          |
| 108081                                                                                                 | 108117 | 96112  | 109118 | misc_RNA | product | large latency transcript       | 108081-108117 | 5:02:01  |
| CCGCCCCGAGGGCGCATCTTGCCCCCTGACGGCC                                                                     |        |        |        |          |         |                                |               |          |
| 108163                                                                                                 | 108180 | 96112  | 109118 | misc_RNA | product | large latency transcript       | 108163-108180 | 4:01:01  |
| CCGGCCCCCGCGGCGGCC                                                                                     |        |        |        |          |         |                                |               |          |
| 108165                                                                                                 | 108215 | 96112  | 109118 | misc_RNA | product | large latency transcript       | 108165-108215 | 8:05:02  |
| GGCCCCCGCGGCGGCATCTCGGCTCGCCCGGGCCAATGGGCGCGGAGG                                                       |        |        |        |          |         |                                |               |          |
| 108414                                                                                                 | 108444 | 96112  | 109118 | misc_RNA | product | large latency transcript       | 108414-108444 | 5:02:01  |
| CCCCACGTGGCGCCCTCGGCCAATGGGGCC                                                                         |        |        |        |          |         |                                |               |          |
| 108692                                                                                                 | 108706 | 96112  | 109118 | misc_RNA | product | large latency transcript       | 108692-108706 | 5:02:01  |

|                                                                                    |        |        |        |          |                                  |               |                             |
|------------------------------------------------------------------------------------|--------|--------|--------|----------|----------------------------------|---------------|-----------------------------|
| CCGCCTCCCCCTGCC                                                                    |        |        |        |          |                                  |               |                             |
| 108717                                                                             | 108801 | 96112  | 109118 | misc_RNA | product large latency transcript | 108717-108801 | 16:13:04                    |
| CCCCGAGACCCCGTTTCCCCCTCCTCGAGACCCCTGAGACCCCGAGACCCTCCCGCGACCCCGCGGTCGCCCCACCCGCGCC |        |        |        |          |                                  |               |                             |
| 108857                                                                             | 108894 | 96112  | 109118 | misc_RNA | product large latency transcript | 108857-108894 | 7:04:01                     |
| CCGCCGTCGGACCGGGGACCGGCGACCGGACCCGAACC                                             |        |        |        |          |                                  |               |                             |
| 108865                                                                             | 108885 | 96112  | 109118 | misc_RNA | product large latency transcript | 108865-108885 | 4:01:01                     |
| GGACCGGGGACCGGCGACCGG                                                              |        |        |        |          |                                  |               |                             |
| 108920                                                                             | 108956 | 96112  | 109118 | misc_RNA | product large latency transcript | 108920-108956 | 7:04:01                     |
| CCGGACCCGAACCTCGAGCCCGGACCCGCGCCGGACCC                                             |        |        |        |          |                                  |               |                             |
| 108951                                                                             | 108972 | 96112  | 109118 | misc_RNA | product large latency transcript | 108951-108972 | 5:02:01                     |
| GGACCCGGAAGGAAGGAGCCGG                                                             |        |        |        |          |                                  |               |                             |
| 109000                                                                             | 109028 | 96112  | 109118 | misc_RNA | product large latency transcript | 109000-109028 | 8:05:02                     |
| CCCACCCACCCCTCCTCTCCCCACCCC                                                        |        |        |        |          |                                  |               |                             |
| 109042                                                                             | 109062 | 96112  | 109118 | misc_RNA | product large latency transcript | 109042-109062 | 5:02:01                     |
| CCCGGTCCCCCTCCCACCCC                                                               |        |        |        |          |                                  |               |                             |
| 115996                                                                             | 116017 | 115995 | 117089 | CDS      | product regulatory protein ICP22 | 115996-116017 | 4:01:01                     |
| GGACCGGGTCTGGGCCGACTGG                                                             |        |        |        |          |                                  |               |                             |
| 116024                                                                             | 116088 | 115995 | 117089 | CDS      | product regulatory protein ICP22 | 116024-116088 | 11:08:02                    |
| CCCGTGCCCTCCCCGCCGTTCTCGCCCGTCGACCCGCCCGGGCCCCGCCCACGACCCCGGTCCC                   |        |        |        |          |                                  |               |                             |
| 116098                                                                             | 116131 | 115995 | 117089 | CDS      | product regulatory protein ICP22 | 116098-116131 | 9:06:02                     |
| CCCCCGTCCCCCGCTCGACCCACGCCCCC                                                      |        |        |        |          |                                  |               |                             |
| 116171                                                                             | 116185 | 115995 | 117089 | CDS      | product regulatory protein ICP22 | 116171-116185 | 4:01:01 CCCCCGCCCGACCCC     |
| 116380                                                                             | 116398 | 115995 | 117089 | CDS      | product regulatory protein ICP22 | 116380-116398 | 4:01:01 CCAGCGCCCCTCGGCCCCC |

|                                                                                    |        |        |        |                                                 |               |          |
|------------------------------------------------------------------------------------|--------|--------|--------|-------------------------------------------------|---------------|----------|
| 116488                                                                             | 116508 | 115995 | 117089 | CDS product regulatory protein ICP22            | 116488-116508 | 4:01:01  |
| CCCGCGCTCCTCTCCCGCC                                                                |        |        |        |                                                 |               |          |
| 116603                                                                             | 116687 | 115995 | 117089 | CDS product regulatory protein ICP22            | 116603-116687 | 15:12:03 |
| GGCTCGGTGTGCGAGGACGACGGGAGGACGAGGACGAAGAGGAAGACGGGAGGAGGAAGACGAGGACGAGGAGGGGAAGAGG |        |        |        |                                                 |               |          |
| 116698                                                                             | 116732 | 115995 | 117089 | CDS product regulatory protein ICP22            | 116698-116732 | 7:04:01  |
| GGAGGAAGAGGAAGGGACGAGGACGGGAGACGG                                                  |        |        |        |                                                 |               |          |
| 116743                                                                             | 116786 | 115995 | 117089 | CDS product regulatory protein ICP22            | 116743-116786 | 9:06:02  |
| GGAGGACGACGAGGCCGAGGACGAGGAGGACGAGGAGGACGGG                                        |        |        |        |                                                 |               |          |
| 116839                                                                             | 116888 | 115995 | 117089 | CDS product regulatory protein ICP22            | 116839-116888 | 10:07:02 |
| GGACGGCTCGGACGGAGAGGGCTCGGGCTCGGACGACGGCGGGGACGGG                                  |        |        |        |                                                 |               |          |
| 116920                                                                             | 116988 | 115995 | 117089 | CDS product regulatory protein ICP22            | 116920-116988 | 13:10:03 |
| GGACGAGGACGATGGAGAGGACGAGGAGGACGAGGAAGGGAGGACGGGGGGAAGACGGCGAAGACGG                |        |        |        |                                                 |               |          |
| 117011                                                                             | 117035 | 115995 | 117089 | CDS product regulatory protein ICP22            | 117011-117035 | 6:03:01  |
| GGAGAGGGCGAGGAGGGCGGAAGG                                                           |        |        |        |                                                 |               |          |
| 117060                                                                             | 117084 | 115995 | 117089 | CDS product regulatory protein ICP22            | 117060-117084 | 5:02:01  |
| CCCCGACGCGGCCCGCCGCCGCC                                                            |        |        |        |                                                 |               |          |
| 118439                                                                             | 118463 | 118332 | 119336 | CDS product serine/threonine protein kinase US3 | 118439-118463 | 5:02:01  |
| GGGGGCTGACGCGGCAGGCCCGG                                                            |        |        |        |                                                 |               |          |
| 118537                                                                             | 118581 | 118332 | 119336 | CDS product serine/threonine protein kinase US3 | 118537-118581 | 9:06:02  |
| GGCCCCCGGCCGGGCGAGGCGGACACGGTGGTGCTGAAGGTGGG                                       |        |        |        |                                                 |               |          |
| 118935                                                                             | 118960 | 118332 | 119336 | CDS product serine/threonine protein kinase US3 | 118935-118960 | 5:02:01  |
| CCGGGACCATCGAGACCAACGCCCC                                                          |        |        |        |                                                 |               |          |
| 119004                                                                             | 119018 | 118332 | 119336 | CDS product serine/threonine protein kinase US3 | 119004-119018 | 4:01:01  |

|                                                                                    |        |        |        |                                                 |               |                                |
|------------------------------------------------------------------------------------|--------|--------|--------|-------------------------------------------------|---------------|--------------------------------|
| GGGGCGGGGGTGG                                                                      |        |        |        |                                                 |               |                                |
| 119092                                                                             | 119114 | 118332 | 119336 | CDS product serine/threonine protein kinase US3 | 119092-119114 | 4:01:01                        |
| CCTGATCGACCTCATCCGCGCCC                                                            |        |        |        |                                                 |               |                                |
| 119170                                                                             | 119196 | 118332 | 119336 | CDS product serine/threonine protein kinase US3 | 119170-119196 | 6:03:01                        |
| CCGGTACGCCGGGACCCACGCCAGCC                                                         |        |        |        |                                                 |               |                                |
| 119279                                                                             | 119296 | 118332 | 119336 | CDS product serine/threonine protein kinase US3 | 119279-119296 | 5:02:01                        |
| CCCGTCCGCCGCCCTTCC                                                                 |        |        |        |                                                 |               |                                |
| 119415                                                                             | 119465 | 119396 | 120892 | CDS product envelope glycoprotein G             | 119415-119465 | 7:04:01                        |
| CCTCGCCCTCGGGCTCCTCGTGGTCCGCACCGTCGTGGCCAGAGAGGCCCC                                |        |        |        |                                                 |               |                                |
| 119484                                                                             | 119568 | 119396 | 120892 | CDS product envelope glycoprotein G             | 119484-119568 | 15:12:03                       |
| CCACCCCGTCCACGACGACCGGCGGCGCCGTCGGGCGCGACCGACGCCAGCCCGTGAACCCGCTCGCCCCGCCAACGCCACC |        |        |        |                                                 |               |                                |
| 119601                                                                             | 119615 | 119396 | 120892 | CDS product envelope glycoprotein G             | 119601-119615 | 4:01:01 CCTCCTGGATCCGCC        |
| 119724                                                                             | 119745 | 119396 | 120892 | CDS product envelope glycoprotein G             | 119724-119745 | 4:01:01 CCCCAGGGACGCCATGCCCTCC |
| 119894                                                                             | 119914 | 119396 | 120892 | CDS product envelope glycoprotein G             | 119894-119914 | 4:01:01 CCTACCTCGGCACCGTCTCCC  |
| 119919                                                                             | 119935 | 119396 | 120892 | CDS product envelope glycoprotein G             | 119919-119935 | 4:01:01 GGTGGAGGCCAACCTGG      |
| 119972                                                                             | 120022 | 119396 | 120892 | CDS product envelope glycoprotein G             | 119972-120022 | 11:08:02                       |
| CCCGCCCCGGGGCCACCCTCCCACCCATCGCCCCACGGCCGGCGACCACC                                 |        |        |        |                                                 |               |                                |
| 120173                                                                             | 120186 | 119396 | 120892 | CDS product envelope glycoprotein G             | 120173-120186 | 4:01:01 CCCCCGAGGCCCCC         |
| 120180                                                                             | 120214 | 119396 | 120892 | CDS product envelope glycoprotein G             | 120180-120214 | 7:04:01                        |
| GGCCCCGAGGGCGAGGAGGTGACCGAGGAGGAGG                                                 |        |        |        |                                                 |               |                                |
| 120215                                                                             | 120235 | 119396 | 120892 | CDS product envelope glycoprotein G             | 120215-120235 | 4:01:01 CCGAGCTGACCTCCAGCGACC  |
| 120400                                                                             | 120436 | 119396 | 120892 | CDS product envelope glycoprotein G             | 120400-120436 | 10:07:02                       |
| CCGCCTCCACCACCCCGCGCCCCACCCGCGCGGCC                                                |        |        |        |                                                 |               |                                |

|        |        |        |        |                                             |               |         |                         |
|--------|--------|--------|--------|---------------------------------------------|---------------|---------|-------------------------|
| 120447 | 120466 | 119396 | 120892 | CDS product envelope glycoprotein G         | 120447-120466 | 4:01:01 | CCATGACCACGGTCACCACC    |
| 120498 | 120519 | 119396 | 120892 | CDS product envelope glycoprotein G         | 120498-120519 | 5:02:01 | CCGACTGCCGCCGAGCCGACC   |
| 120548 | 120583 | 119396 | 120892 | CDS product envelope glycoprotein G         | 120548-120583 | 7:04:01 |                         |
|        |        |        |        | CCCCACCGGCAGCCCCGCCCTGCTCCTGGGCTTCC         |               |         |                         |
| 120599 | 120624 | 119396 | 120892 | CDS product envelope glycoprotein G         | 120599-120624 | 5:02:01 |                         |
|        |        |        |        | CCTCGCGCCCCCTGCACCTGACGGCC                  |               |         |                         |
| 120666 | 120694 | 119396 | 120892 | CDS product envelope glycoprotein G         | 120666-120694 | 6:03:01 |                         |
|        |        |        |        | CCGCCACATCCGCTCCCTCGGCGGCCTCC               |               |         |                         |
| 120710 | 120745 | 119396 | 120892 | CDS product envelope glycoprotein G         | 120710-120745 | 8:05:02 |                         |
|        |        |        |        | CCGAGACCACCAACACCACCACCCAGACGGGCC           |               |         |                         |
| 120845 | 120866 | 119396 | 120892 | CDS product envelope glycoprotein G         | 120845-120866 | 4:01:01 | GGGCCCCGGGCCCGGAACGACGG |
| 121094 | 121112 | 121075 | 122277 | CDS product envelope glycoprotein D         | 121094-121112 | 4:01:01 | GGCGGCGCTGGTCGCCCGG     |
| 121138 | 121181 | 121075 | 122277 | CDS product envelope glycoprotein D         | 121138-121181 | 9:06:02 |                         |
|        |        |        |        | CCGTGCCCCGCGCCGACCTTCCCCCGCCCGGTACCCGTACACC |               |         |                         |
| 121322 | 121340 | 121075 | 122277 | CDS product envelope glycoprotein D         | 121322-121340 | 5:02:01 | GGCGGTGGCCCACCGGCGG     |
| 121330 | 121371 | 121075 | 122277 | CDS product envelope glycoprotein D         | 121330-121371 | 7:04:01 |                         |
|        |        |        |        | CCCACCGCGGCCACGTACCGCGCCACGTGGCCTGGTACC     |               |         |                         |
| 121451 | 121468 | 121075 | 122277 | CDS product envelope glycoprotein D         | 121451-121468 | 4:01:01 | CCGGCGCCGCACCACGCC      |
| 121532 | 121547 | 121075 | 122277 | CDS product envelope glycoprotein D         | 121532-121547 | 4:01:01 | GGTGGCTCCGGGGCGG        |
| 121559 | 121580 | 121075 | 122277 | CDS product envelope glycoprotein D         | 121559-121580 | 4:01:01 | CCAGTACCGGCGCTGGTGTCC   |
| 121640 | 121665 | 121075 | 122277 | CDS product envelope glycoprotein D         | 121640-121665 | 4:01:01 |                         |
|        |        |        |        | CCCGTTGCCCCGCGTGGACCAGCACC                  |               |         |                         |
| 121733 | 121764 | 121075 | 122277 | CDS product envelope glycoprotein D         | 121733-121764 | 6:03:01 |                         |



|                                                                                                    |        |        |        |                                     |               |                                  |
|----------------------------------------------------------------------------------------------------|--------|--------|--------|-------------------------------------|---------------|----------------------------------|
| CCTGACGCCGTTCTACCAGCAGCCCCGACACC                                                                   |        |        |        |                                     |               |                                  |
| 121799                                                                                             | 121859 | 121075 | 122277 | CDS product envelope glycoprotein D | 121799–121859 | 10:07:02                         |
| CCGGACGCTCCCGCGGGCCTACGCCGCCACGCCGTACGCCATCGACCCCGCGGCCCC                                          |        |        |        |                                     |               |                                  |
| 121872                                                                                             | 121957 | 121075 | 122277 | CDS product envelope glycoprotein D | 121872–121957 | 16:13:04                         |
| CCGAGGCCAGGCCCCGGCCCCGGCCCCGAGCCCAGCCCCGGTGACGCCCGCCCCCGCCGCTGCCCCGAGCC                            |        |        |        |                                     |               |                                  |
| 121876                                                                                             | 121901 | 121075 | 122277 | CDS product envelope glycoprotein D | 121876–121901 | 5:02:01                          |
| GGCCCAGGCCCCGGCCCCGGCCCCGG                                                                         |        |        |        |                                     |               |                                  |
| 121970                                                                                             | 122054 | 121075 | 122277 | CDS product envelope glycoprotein D | 121970–122054 | 16:13:04                         |
| CCACGCCGCCGGGGCCACCCACGCCGCGACCCCGAGGCCGAGACGCCGACCGCCCCCTCGCCCCCGGGCGTCGTGCCC                     |        |        |        |                                     |               |                                  |
| 122064                                                                                             | 122107 | 121075 | 122277 | CDS product envelope glycoprotein D | 122064–122107 | 9:06:02                          |
| CCGCAGCCCGCGGAGCCGTTCCAGCCGCGGACCCCGCCGCGCC                                                        |        |        |        |                                     |               |                                  |
| 122341                                                                                             | 122376 | 122298 | 123398 | CDS product envelope glycoprotein I | 122341–122376 | 8:05:02                          |
| CCTCCTCGCCGCCCTGACCCTGGCCGCCCTGACCCC                                                               |        |        |        |                                     |               |                                  |
| 122427                                                                                             | 122449 | 122298 | 123398 | CDS product envelope glycoprotein I | 122427–122449 | 4:01:01 CCGGCAGCGCCGTCCCTCGTGCCC |
| 122593                                                                                             | 122624 | 122298 | 123398 | CDS product envelope glycoprotein I | 122593–122624 | 6:03:01                          |
| CCTCTGCCCCGCGTGACACAGAGGCCTTCC                                                                     |        |        |        |                                     |               |                                  |
| 122674                                                                                             | 122689 | 122298 | 123398 | CDS product envelope glycoprotein I | 122674–122689 | 4:01:01 GGTGGAGGCGCGCCGG         |
| 122806                                                                                             | 122830 | 122298 | 123398 | CDS product envelope glycoprotein I | 122806–122830 | 6:03:01                          |
| CCCCCACCACCCACGCCGTGCTCC                                                                           |        |        |        |                                     |               |                                  |
| 122887                                                                                             | 122992 | 122298 | 123398 | CDS product envelope glycoprotein I | 122887–122992 | 20:17:05                         |
| CCCCGCCGAGGACCGGTGTTACACGCCGCCCGGATCGAGCCAGAGCCGCCGACGACCCCGCGCCCCCGGGGGACCGGCGCCACCCCGAGCCCCGCTCC |        |        |        |                                     |               |                                  |
| 123001                                                                                             | 123029 | 122298 | 123398 | CDS product envelope glycoprotein I | 123001–123029 | 7:04:01                          |
| GGAGGAGGACGAGGAGGGGGCGACGACGG                                                                      |        |        |        |                                     |               |                                  |

|                                                                        |        |        |        |                                     |               |          |                         |
|------------------------------------------------------------------------|--------|--------|--------|-------------------------------------|---------------|----------|-------------------------|
| 123103                                                                 | 123124 | 122298 | 123398 | CDS product envelope glycoprotein I | 123103-123124 | 5:02:01  | CCTGCTCGCCGCCGCAACGCC   |
| 123127                                                                 | 123148 | 122298 | 123398 | CDS product envelope glycoprotein I | 123127-123148 | 4:01:01  | GGCGGGCGCCCGGGCCCCGGG   |
| 123559                                                                 | 123629 | 123502 | 125235 | CDS product envelope glycoprotein E | 123559-123629 | 12:09:03 |                         |
| CCACCGAGGCCCCGAGCCTCTCCGCCGAGACGACCCCGGGCCCCGTCACCGAGGTCCCAGTCCCTCGGCC |        |        |        |                                     |               |          |                         |
| 123641                                                                 | 123656 | 123502 | 125235 | CDS product envelope glycoprotein E | 123641-123656 | 4:01:01  | CCTCTCCACCGAGGCC        |
| 123733                                                                 | 123756 | 123502 | 125235 | CDS product envelope glycoprotein E | 123733-123756 | 4:01:01  | GGGAGGCACCCCGGCCCATCTGG |
| 123798                                                                 | 123827 | 123502 | 125235 | CDS product envelope glycoprotein E | 123798-123827 | 6:03:01  |                         |
| GGCGACGGCGCCGTGGTGCCGGGATCTGG                                          |        |        |        |                                     |               |          |                         |
| 123886                                                                 | 123903 | 123502 | 125235 | CDS product envelope glycoprotein E | 123886-123903 | 5:02:01  | CCGCCTGCCACCCGGACC      |
| 123914                                                                 | 123937 | 123502 | 125235 | CDS product envelope glycoprotein E | 123914-123937 | 4:01:01  | CCGCGCTGCGTCCCCGAGGCCCC |
| 123932                                                                 | 123952 | 123502 | 125235 | CDS product envelope glycoprotein E | 123932-123952 | 4:01:01  | GGCCCCGAGCGGGGCATCGG    |
| 123959                                                                 | 123984 | 123502 | 125235 | CDS product envelope glycoprotein E | 123959-123984 | 5:02:01  |                         |
| CCTGCCGCCGAGGTGCCGCGGCTCC                                              |        |        |        |                                     |               |          |                         |
| 124023                                                                 | 124052 | 123502 | 125235 | CDS product envelope glycoprotein E | 124023-124052 | 6:03:01  |                         |
| CCGCACCTGACCGTCCGGCGGGCCACGCCC                                         |        |        |        |                                     |               |          |                         |
| 124112                                                                 | 124127 | 123502 | 125235 | CDS product envelope glycoprotein E | 124112-124127 | 4:01:01  | GGCGGTGGGCGACCGG        |
| 124124                                                                 | 124179 | 123502 | 125235 | CDS product envelope glycoprotein E | 124124-124179 | 9:06:02  |                         |
| CCGGCCGCCCGCGCCGCTGGCCCCGGTGGGCCCCGCGGCCACGAGCCCCGCTTCC                |        |        |        |                                     |               |          |                         |
| 124355                                                                 | 124393 | 123502 | 125235 | CDS product envelope glycoprotein E | 124355-124393 | 6:03:01  |                         |
| CCACCCGCGCGCCCCGAGTGCCTGCGCCCGGTGGACCC                                 |        |        |        |                                     |               |          |                         |
| 124486                                                                 | 124505 | 123502 | 125235 | CDS product envelope glycoprotein E | 124486-124505 | 4:01:01  | CCGCCTGCCCTTCGACGCC     |
| 124570                                                                 | 124592 | 123502 | 125235 | CDS product envelope glycoprotein E | 124570-124592 | 4:01:01  | CCCACAACGGCCACGTCGCCACC |
| 124634                                                                 | 124672 | 123502 | 125235 | CDS product envelope glycoprotein E | 124634-124672 | 6:03:01  |                         |

|                                                                 |               |                                   |
|-----------------------------------------------------------------|---------------|-----------------------------------|
| GGTCATCAAGGAGCTGACGGCCCCGGCCGGCCCCGGG                           |               |                                   |
| 124654 124688 123502 125235 CDS product envelope glycoprotein E | 124654-124688 | 5:02:01                           |
| CCCCGGCCCCGGCCCCGGGCACCCCGTGGGGCCCC                             |               |                                   |
| 124681 124696 123502 125235 CDS product envelope glycoprotein E | 124681-124696 | 4:01:01 GGGGCCCCGGCGGCGG          |
| 124731 124767 123502 125235 CDS product envelope glycoprotein E | 124731-124767 | 6:03:01                           |
| CCGGCGCCCGCCGCGCCCCGTGGAACCCGTACGGCC                            |               |                                   |
| 124861 124897 123502 125235 CDS product envelope glycoprotein E | 124861-124897 | 7:04:01                           |
| CCCCGCCCGGGCGGCTCGCGGCCGTTCCGGTGCC                              |               |                                   |
| 124870 124893 123502 125235 CDS product envelope glycoprotein E | 124870-124893 | 4:01:01 GGGCGGCCTCGCGGCCGTTCCGGG  |
| 124999 125021 123502 125235 CDS product envelope glycoprotein E | 124999-125021 | 6:03:01 CCCGCCGGCGGCCCTCCTCCCC    |
| 125022 125045 123502 125235 CDS product envelope glycoprotein E | 125022-125045 | 4:01:01 GCGGGGACAGCGGTACGAGGGG    |
| 125200 125211 123502 125235 CDS product envelope glycoprotein E | 125200-125211 | 4:01:01 CCGCCAGCCGCC              |
| 125306 125323 125293 125589 CDS product membrane protein US9    | 125306-125323 | 4:01:01 CCCCAGCGCCCCGTCCC         |
| 125339 125394 125293 125589 CDS product membrane protein US9    | 125339-125394 | 10:07:02                          |
| CCCGGCCCGCGACGTCCTGCTGGCCCCCAAGGGACCCGCTCCCCGCTGCGCCCC          |               |                                   |
| 125462 125486 125293 125589 CDS product membrane protein US9    | 125462-125486 | 5:02:01                           |
| GGGACGCCGGCAGGCGGCGCGCCGG                                       |               |                                   |
| 125483 125502 125293 125589 CDS product membrane protein US9    | 125483-125502 | 4:01:01 CCGGAGACGCCGCCGCTGCC      |
| 125875 125903 125811 126581 CDS product virion protein US2      | 125875-125903 | 5:02:01                           |
| GGGCGAGGCGCACCCGACCTGTGGAAGG                                    |               |                                   |
| 126018 126043 125811 126581 CDS product virion protein US2      | 126018-126043 | 4:01:01 CCCTGCTGCCGCGGCCACGCGCCCC |
| 126137 126168 125811 126581 CDS product virion protein US2      | 126137-126168 | 6:03:01                           |
| CCCGGGGAGCCCCTCCGTATCAGCCGCCCCC                                 |               |                                   |

|                                                                                                |        |        |        |                                      |               |          |                           |
|------------------------------------------------------------------------------------------------|--------|--------|--------|--------------------------------------|---------------|----------|---------------------------|
| 126171                                                                                         | 126187 | 125811 | 126581 | CDS product virion protein US2       | 126171-126187 | 4:01:01  | GGCTGGACACGGAGTGG         |
| 126223                                                                                         | 126239 | 125811 | 126581 | CDS product virion protein US2       | 126223-126239 | 4:01:01  | GGGGGCCCGGGCACGG          |
| 126240                                                                                         | 126336 | 125811 | 126581 | CDS product virion protein US2       | 126240-126336 | 18:15:04 |                           |
| CCCCGATCCACCTGTGGATCCTGGGCGCCGCCGACCTCTGCGACCAGGTGCTCCTGGCCGCTCCCGCAGCACCGCCGCGGAGCCCCGGCGCCCC |        |        |        |                                      |               |          |                           |
| 126357                                                                                         | 126377 | 125811 | 126581 | CDS product virion protein US2       | 126357-126377 | 5:02:01  | GGCGGCGGCCCCGGGTGACGG     |
| 126405                                                                                         | 126427 | 125811 | 126581 | CDS product virion protein US2       | 126405-126427 | 5:02:01  | CCGGGATCCCGGCCACCCGCGCC   |
| 126442                                                                                         | 126466 | 125811 | 126581 | CDS product virion protein US2       | 126442-126466 | 5:02:01  | CCACAACCGCTCCTGGCGCCACGCC |
| 126467                                                                                         | 126482 | 125811 | 126581 | CDS product virion protein US2       | 126467-126482 | 4:01:01  | GGCGAGTGGACGGAGG          |
| 126522                                                                                         | 126546 | 125811 | 126581 | CDS product virion protein US2       | 126522-126546 | 5:02:01  | GGCGCCGGGCGGGCGGCAACGG    |
| 127516                                                                                         | 127540 | 127513 | 128607 | CDS product regulatory protein ICP22 | 127516-127540 | 5:02:01  |                           |
| GGGGCGGCGGGCGGGCCGTCGGGG                                                                       |        |        |        |                                      |               |          |                           |
| 127565                                                                                         | 127589 | 127513 | 128607 | CDS product regulatory protein ICP22 | 127565-127589 | 6:03:01  |                           |
| CCTTCCCGCCCTCCTCGCCCTCTCC                                                                      |        |        |        |                                      |               |          |                           |
| 127612                                                                                         | 127680 | 127513 | 128607 | CDS product regulatory protein ICP22 | 127612-127680 | 13:10:03 |                           |
| CCGTCTTCGCGTCTTCCCCCGTCCTCCCTTCCTCGTCCTCCTCGTCTCTCCATCGTCCTCGTCC                               |        |        |        |                                      |               |          |                           |
| 127712                                                                                         | 127761 | 127513 | 128607 | CDS product regulatory protein ICP22 | 127712-127761 | 10:07:02 |                           |
| CCCCGTCCCCGCGTCGTCCGAGCCCGAGCCCTCTCCGTCCGAGCCGTCC                                              |        |        |        |                                      |               |          |                           |
| 127814                                                                                         | 127857 | 127513 | 128607 | CDS product regulatory protein ICP22 | 127814-127857 | 9:06:02  |                           |
| CCCCGTCTCCTCGTCCTCCTCGTCCTCGGCCTCGTCGTCTCTCC                                                   |        |        |        |                                      |               |          |                           |
| 127868                                                                                         | 127902 | 127513 | 128607 | CDS product regulatory protein ICP22 | 127868-127902 | 7:04:01  |                           |
| CCGTCTCCCCGTCTCGTCCCCTTCTCTTCTCTCC                                                             |        |        |        |                                      |               |          |                           |
| 127913                                                                                         | 127997 | 127513 | 128607 | CDS product regulatory protein ICP22 | 127913-127997 | 15:12:03 |                           |
| CCTCTTCCCCCTCCTCGTCCTCGTCTTCTCTCCTCCCCGTCTTCTCTTCGTCTCGTCTCCCCGTCTCTCGCACACCGAGCC              |        |        |        |                                      |               |          |                           |

|                                                                                                     |        |        |        |                                            |               |                            |
|-----------------------------------------------------------------------------------------------------|--------|--------|--------|--------------------------------------------|---------------|----------------------------|
| 128092                                                                                              | 128112 | 127513 | 128607 | CDS product regulatory protein ICP22       | 128092-128112 | 4:01:01                    |
| GGCGGGGAGAGGACGCGCGG                                                                                |        |        |        |                                            |               |                            |
| 128202                                                                                              | 128220 | 127513 | 128607 | CDS product regulatory protein ICP22       | 128202-128220 | 4:01:01 GGGGGCCGAGGGCGCTGG |
| 128415                                                                                              | 128429 | 127513 | 128607 | CDS product regulatory protein ICP22       | 128415-128429 | 4:01:01 GGGGTCGGGCGGGG     |
| 128469                                                                                              | 128502 | 127513 | 128607 | CDS product regulatory protein ICP22       | 128469-128502 | 9:06:02                    |
| GGGGGGCGTGGGGTCGAGGCGGGGACGGGGG                                                                     |        |        |        |                                            |               |                            |
| 128512                                                                                              | 128576 | 127513 | 128607 | CDS product regulatory protein ICP22       | 128512-128576 | 11:08:02                   |
| GGGACCGGGTCGTGGCCGGGCCCCGGCGGGTCGACGGGCGAGAACGGCGGGGAGGGCACGGG                                      |        |        |        |                                            |               |                            |
| 128583                                                                                              | 128604 | 127513 | 128607 | CDS product regulatory protein ICP22       | 128583-128604 | 4:01:01                    |
| CCAGTCGCCCCAGACCCGGTCC                                                                              |        |        |        |                                            |               |                            |
| 137137                                                                                              | 137164 | 137091 | 141431 | CDS product transcriptional regulator ICP4 | 137137-137164 | 6:03:01                    |
| CCAGCTCCTGGCGGCCGCCGCGGGCC                                                                          |        |        |        |                                            |               |                            |
| 137186                                                                                              | 137237 | 137091 | 141431 | CDS product transcriptional regulator ICP4 | 137186-137237 | 8:05:02                    |
| GGCCCCGACGGCGGCAGCCAGGGTCCCCGGCGCCGCGGTCTCTCCGGCGAGG                                                |        |        |        |                                            |               |                            |
| 137203                                                                                              | 137230 | 137091 | 141431 | CDS product transcriptional regulator ICP4 | 137203-137230 | 5:02:01                    |
| CCAGGGCTCCCGGCGCCGCGGTCTCTCC                                                                        |        |        |        |                                            |               |                            |
| 137242                                                                                              | 137348 | 137091 | 141431 | CDS product transcriptional regulator ICP4 | 137242-137348 | 18:15:04                   |
| CCTCTTCGGCCCCGGCGGCCTCTTCTCCGACGACGCCCGAGGCCGAGCCGCGCTCTCGCGCCGCGCCGGAGCCACGAGGCCGCCCGTCCTCTTCGGCCC |        |        |        |                                            |               |                            |
| 137423                                                                                              | 137449 | 137091 | 141431 | CDS product transcriptional regulator ICP4 | 137423-137449 | 6:03:01                    |
| CCCCGGTCCCCGGCCGCGGGTCCCCC                                                                          |        |        |        |                                            |               |                            |
| 137426                                                                                              | 137456 | 137091 | 141431 | CDS product transcriptional regulator ICP4 | 137426-137456 | 5:02:01                    |
| GGGTCCCCGGCCGCGGGTCCCCCGGTCTGGG                                                                     |        |        |        |                                            |               |                            |
| 137485                                                                                              | 137538 | 137091 | 141431 | CDS product transcriptional regulator ICP4 | 137485-137538 | 10:07:02                   |

|                                                                                    |               |          |               |
|------------------------------------------------------------------------------------|---------------|----------|---------------|
| CCTCGTCCTCGGGCCCCGGTCCCGGGCCGGCTCCGGGGCCCCGGCCGCCGACCCC                            |               |          |               |
| 137495 137527 137091 141431 CDS product transcriptional regulator ICP4             | 137495-137527 | 6:03:01  |               |
| GGGCCCCGGTCCCGGGCCGGCTCCGGGCCCCGG                                                  |               |          |               |
| 137554 137584 137091 141431 CDS product transcriptional regulator ICP4             | 137554-137584 | 6:03:01  |               |
| GGCAGAGGCCGGGGCCCCCGGCGGCCCGGG                                                     |               |          |               |
| 137562 137581 137091 141431 CDS product transcriptional regulator ICP4             | 137562-137581 | 4:01:01  |               |
| CCGGGGCCCCCGGCGGCCCC                                                               |               |          |               |
| 137592 137649 137091 141431 CDS product transcriptional regulator ICP4             | 137592-137649 | 12:09:03 |               |
| CCCCCTCCGCAGCCTCCCCGGCCTCCTCCTCCGGCTCTCCCGGCCCTCGGCAGCCCC                          |               |          |               |
| 137670 137720 137091 141431 CDS product transcriptional regulator ICP4             | 137670-137720 | 10:07:02 |               |
| GGGGGGACCCGGTCCGTGAGCCCCGGCCGGCGCGCGCTCGGACCCCGG                                   |               |          |               |
| 137708 137736 137091 141431 CDS product transcriptional regulator ICP4             | 137708-137736 | 5:02:01  |               |
| CCTCGGACCCCGGCGCCACCAGCACAGCC                                                      |               |          |               |
| 137758 137770 137091 141431 CDS product transcriptional regulator ICP4             | 137758-137770 | 4:01:01  | GGCACGGCGGGGG |
| 137771 137802 137091 141431 CDS product transcriptional regulator ICP4             | 137771-137802 | 8:05:02  |               |
| CCCGCTTCCCCAGCCTCCCCCGCCGCCGGGCC                                                   |               |          |               |
| 137798 137826 137091 141431 CDS product transcriptional regulator ICP4             | 137798-137826 | 7:04:01  |               |
| GGGCCGGTCTCGGCGCCCGGCGGCGGCGG                                                      |               |          |               |
| 137829 137839 137091 141431 CDS product transcriptional regulator ICP4             | 137829-137839 | 4:01:01  | CCCCCTCCGCC   |
| 137860 137882 137091 141431 CDS product transcriptional regulator ICP4             | 137860-137882 | 4:01:01  |               |
| CCATCACCAGCACCGGAGCCCC                                                             |               |          |               |
| 137934 138016 137091 141431 CDS product transcriptional regulator ICP4             | 137934-138016 | 15:12:03 |               |
| CCCGGAGCCCCGTCTCTCCAACCCAACTCCAACCTCCAACCTCCACCACCACCGTCGCCGTCGAGACCGTCGCCGCGGCCCC |               |          |               |

|                                                                                                                        |        |        |        |                                            |               |          |                 |
|------------------------------------------------------------------------------------------------------------------------|--------|--------|--------|--------------------------------------------|---------------|----------|-----------------|
| 138022                                                                                                                 | 138059 | 137091 | 141431 | CDS product transcriptional regulator ICP4 | 138022-138059 | 7:04:01  |                 |
| GGACGAGGACGGACTCGGCCTCGCCGGGGACGGCGGGG                                                                                 |        |        |        |                                            |               |          |                 |
| 138077                                                                                                                 | 138094 | 137091 | 141431 | CDS product transcriptional regulator ICP4 | 138077-138094 | 4:01:01  |                 |
| CCCCGCCGGCGCCGCGCC                                                                                                     |        |        |        |                                            |               |          |                 |
| 138105                                                                                                                 | 138119 | 137091 | 141431 | CDS product transcriptional regulator ICP4 | 138105-138119 | 4:01:01  | CCCTCCGCCGCGGCC |
| 138160                                                                                                                 | 138208 | 137091 | 141431 | CDS product transcriptional regulator ICP4 | 138160-138208 | 12:09:03 |                 |
| CCTCTCCCCGGCCCGCTCGCCCTCGCCCCCGGGCCCCCGCCGCGCC                                                                         |        |        |        |                                            |               |          |                 |
| 138222                                                                                                                 | 138280 | 137091 | 141431 | CDS product transcriptional regulator ICP4 | 138222-138280 | 14:11:03 |                 |
| CCTCTCCTCGTCCTCGTCCTCCTCGTCCTCCTCGTCCTCGTCCTCCTCC                                                                      |        |        |        |                                            |               |          |                 |
| 138304                                                                                                                 | 138444 | 137091 | 141431 | CDS product transcriptional regulator ICP4 | 138304-138444 | 30:27:07 |                 |
| CCGGCCCCGGCGCCCACTCGCCCGCGCCGGGCGCCACCGTCTCCGCCGGCGCCCGCGGCCCCGGGCCCTCGGCCTCCTCCGCTCCTCCGCCGGCGCCTCCCCGGCCCCGGCCCCGAGC |        |        |        |                                            |               |          |                 |
| CCGCCCCGGCCCC                                                                                                          |        |        |        |                                            |               |          |                 |
| 138406                                                                                                                 | 138428 | 137091 | 141431 | CDS product transcriptional regulator ICP4 | 138406-138428 | 4:01:01  |                 |
| GGCCTCCCCGGCCCCGGCCCCGG                                                                                                |        |        |        |                                            |               |          |                 |
| 138457                                                                                                                 | 138476 | 137091 | 141431 | CDS product transcriptional regulator ICP4 | 138457-138476 | 5:02:01  |                 |
| CCGCTCCACCAACAACCACC                                                                                                   |        |        |        |                                            |               |          |                 |
| 138489                                                                                                                 | 138516 | 137091 | 141431 | CDS product transcriptional regulator ICP4 | 138489-138516 | 6:03:01  |                 |
| CCGACGGGCCCCCGCCGACGACGGGCC                                                                                            |        |        |        |                                            |               |          |                 |
| 138539                                                                                                                 | 138578 | 137091 | 141431 | CDS product transcriptional regulator ICP4 | 138539-138578 | 8:05:02  |                 |
| CCCTGGCCCGGCTCCGACCCTCCGGCCGACGGCCGCGTCC                                                                               |        |        |        |                                            |               |          |                 |
| 138631                                                                                                                 | 138676 | 137091 | 141431 | CDS product transcriptional regulator ICP4 | 138631-138676 | 9:06:02  |                 |
| CCGCCAGGCCGCGGCCCGCTACCGCGCCGCGCGGGCCCGTGCCC                                                                           |        |        |        |                                            |               |          |                 |
| 138688                                                                                                                 | 138706 | 137091 | 141431 | CDS product transcriptional regulator ICP4 | 138688-138706 | 4:01:01  |                 |

|                                                                                                                              |        |        |        |                                            |               |          |
|------------------------------------------------------------------------------------------------------------------------------|--------|--------|--------|--------------------------------------------|---------------|----------|
| GGAGATGGGGGACTCGAGG                                                                                                          |        |        |        |                                            |               |          |
| 138747                                                                                                                       | 138766 | 137091 | 141431 | CDS product transcriptional regulator ICP4 | 138747-138766 | 4:01:01  |
| CCGCCGCGAGGCCATGTCC                                                                                                          |        |        |        |                                            |               |          |
| 138811                                                                                                                       | 138865 | 137091 | 141431 | CDS product transcriptional regulator ICP4 | 138811-138865 | 8:05:02  |
| CCAGTTCTGCCAGCGCCGGTCCACGCGCCCCACGGCCACGGCTCCTTCATCACC                                                                       |        |        |        |                                            |               |          |
| 138903                                                                                                                       | 138921 | 137091 | 141431 | CDS product transcriptional regulator ICP4 | 138903-138921 | 4:01:01  |
| CCATGGCCGCCAGGACCC                                                                                                           |        |        |        |                                            |               |          |
| 138951                                                                                                                       | 138968 | 137091 | 141431 | CDS product transcriptional regulator ICP4 | 138951-138968 | 4:01:01  |
| CCGTGGCCATGAGCCGCC                                                                                                           |        |        |        |                                            |               |          |
| 138981                                                                                                                       | 139063 | 137091 | 141431 | CDS product transcriptional regulator ICP4 | 138981-139063 | 15:12:03 |
| CCCAGAAGACCTTCATCCTGCAGAGCCTCCGCCGGGCTACGCCGACATGGCCTACCCGGGCCGCGCCGGGACCCCCGCGCC                                            |        |        |        |                                            |               |          |
| 139074                                                                                                                       | 139139 | 137091 | 141431 | CDS product transcriptional regulator ICP4 | 139074-139139 | 11:08:02 |
| CCGTCGAGGCCCTCTGCGCCCGCTCCGCGCCGCTTCGCGCCGCGCAGCCCGCCGCGTGCCCC                                                               |        |        |        |                                            |               |          |
| 139155                                                                                                                       | 139256 | 137091 | 141431 | CDS product transcriptional regulator ICP4 | 139155-139256 | 18:15:04 |
| CCTGCGTCCTGGCCTGCCGCGGCTCCTCGAGCGCCTGCTGCCCTGCCCCTCCGGCTGCCCCGCGCCCGCCCGCCCCGGCCGCTCGGGCCCGCCTGCC                            |        |        |        |                                            |               |          |
| 139300                                                                                                                       | 139318 | 137091 | 141431 | CDS product transcriptional regulator ICP4 | 139300-139318 | 4:01:01  |
| CCCCGGGGCCGGCCCGGCC                                                                                                          |        |        |        |                                            |               |          |
| 139304                                                                                                                       | 139337 | 137091 | 141431 | CDS product transcriptional regulator ICP4 | 139304-139337 | 7:04:01  |
| GGGGCCGGCCCGGCCGAGCGGCGGCAGGCCGCGG                                                                                           |        |        |        |                                            |               |          |
| 139347                                                                                                                       | 139371 | 137091 | 141431 | CDS product transcriptional regulator ICP4 | 139347-139371 | 4:01:01  |
| CCCTCGTCGCCCCACCGTGCGGCC                                                                                                     |        |        |        |                                            |               |          |
| 139398                                                                                                                       | 139569 | 137091 | 141431 | CDS product transcriptional regulator ICP4 | 139398-139569 | 27:24:06 |
| CCCGCGCCCGCGAGCCGCCTGGACCTACGCCGCGGCCCTCTTCGCCCCGGCCAACGTGGCCGCGGCCCGGCTCGCCGAGGCCCGCGCGGCCCGGGCCCGCGGAGCCCGCGCCCGGCTGCCCCCG |        |        |        |                                            |               |          |



CTCTGGCCCCGAGCAGCCCCGGCCTCGTCGTCCCAGCGCCGGCGCC

139447 139468 137091 141431 CDS product transcriptional regulator ICP4  
GGCCAACGTGGCCGCGGCCCGG

139447-139468 4:01:01

139564 139581 137091 141431 CDS product transcriptional regulator ICP4  
GGCGCCGGCGGGCGGGGG

139564-139581 5:02:01

139584 139732 137091 141431 CDS product transcriptional regulator ICP4

139584-139732 30:27:07

CCCCCTCCGGCCTCCCCGGCTCCGGGCCCTCCAGCCCCGCCAGCACCAAGTCCAGCTCCAGCACCAAGTCCAGCTCCAGCACCAAGTCCGGCCTCTCCGGCTCCTCCGGCTACGCCAGCTCCCCCGCC  
GCCGGCCCGGACCCAGCGCCC

139753 139777 137091 141431 CDS product transcriptional regulator ICP4  
CCGCGCGCCCGGGGCCCCGCGCCCC

139753-139777 5:02:01

139778 139814 137091 141431 CDS product transcriptional regulator ICP4  
GGGGACGGCGAGGAGGACGAGGGGCTCTCCGGCGCGG

139778-139814 7:04:01

139855 139870 137091 141431 CDS product transcriptional regulator ICP4

139855-139870 4:01:01 GGACCGGGGGCCCCGG

139898 139918 137091 141431 CDS product transcriptional regulator ICP4  
CCCGCTCCGGACCCCGCTCCC

139898-139918 4:01:01

139929 139948 137091 141431 CDS product transcriptional regulator ICP4  
CCTCCTCCTCCTCCTCCTCC

139929-139948 7:04:01

139957 140002 137091 141431 CDS product transcriptional regulator ICP4  
CCGGCTCCGGCGCCCGCTCGGGCCCATGCCCCGAGACCCCGCGCCC

139957-140002 7:04:01

140014 140111 137091 141431 CDS product transcriptional regulator ICP4  
CCGCCGCTCCCGCCGGCGAGACCCACACGCCGCGGCCCTCCGAGGCGGCCCTCGCCGCCTACTGCCGCCCGAGGTGGCCCGCGCCCTCGTGGACC

140014-140111 16:13:04

140148 140165 137091 141431 CDS product transcriptional regulator ICP4  
CCTTCGACCCGGCCGCCC

140148-140165 4:01:01

|        |        |        |        |                                                                                                    |               |          |
|--------|--------|--------|--------|----------------------------------------------------------------------------------------------------|---------------|----------|
| 140178 | 140215 | 137091 | 141431 | CDS product transcriptional regulator ICP4<br>CCGCGCGCCGCGGCGCCCCGCTCCGCGCCGCGCGCC                 | 140178-140215 | 8:05:02  |
| 140295 | 140348 | 137091 | 141431 | CDS product transcriptional regulator ICP4<br>CCGAGCCCGCCGAGGGCGCCCCGCGCCGGCCTGGGACCCGCGCCGGGCGGCC | 140295-140348 | 9:06:02  |
| 140364 | 140381 | 137091 | 141431 | CDS product transcriptional regulator ICP4<br>CCGCCTTCGCCCACCGCC                                   | 140364-140381 | 5:02:01  |
| 140406 | 140425 | 137091 | 141431 | CDS product transcriptional regulator ICP4<br>GGGCCGGGAAGTGGACCGGG                                 | 140406-140425 | 4:01:01  |
| 140473 | 140504 | 137091 | 141431 | CDS product transcriptional regulator ICP4<br>GGCGCGGACCTCGGCTTCGCCGGCGCCGTGG                      | 140473-140504 | 5:02:01  |
| 140520 | 140542 | 137091 | 141431 | CDS product transcriptional regulator ICP4<br>GGCTCGGCGCGGCGCGCGCCGG                               | 140520-140542 | 5:02:01  |
| 140566 | 140597 | 137091 | 141431 | CDS product transcriptional regulator ICP4<br>GGACTGGCCCGCGGACGGCCCGGCCGTGGGGG                     | 140566-140597 | 7:04:01  |
| 140614 | 140647 | 137091 | 141431 | CDS product transcriptional regulator ICP4<br>CCGCGTCCGCCTGGACCCGGCCGCCAGTGCGCC                    | 140614-140647 | 7:04:01  |
| 140657 | 140683 | 137091 | 141431 | CDS product transcriptional regulator ICP4<br>CCCGGGTGCCGCGAGCTCCGCGCGGCC                          | 140657-140683 | 4:01:01  |
| 140736 | 140786 | 137091 | 141431 | CDS product transcriptional regulator ICP4<br>CCTCCTTCGCCCCGCTGCACCCGGGGCCGAGCCGCTGCGCCTCTGCCGCC   | 140736-140786 | 10:07:02 |
| 140814 | 140864 | 137091 | 141431 | CDS product transcriptional regulator ICP4<br>CCCGCGCCGGGCCCCGACCCGGTCCCGCTGCCGCCGCGCCTACCGCC      | 140814-140864 | 10:07:02 |
| 140884 | 140903 | 137091 | 141431 | CDS product transcriptional regulator ICP4                                                         | 140884-140903 | 4:01:01  |

|                                                                                     |        |        |        |                                            |                        |
|-------------------------------------------------------------------------------------|--------|--------|--------|--------------------------------------------|------------------------|
| GGACGGCTGCAAGGACATGG                                                                |        |        |        |                                            |                        |
| 141021                                                                              | 141073 | 137091 | 141431 | CDS product transcriptional regulator ICP4 | 141021-141073 10:07:02 |
| CCTGCGGCCGCCGGGCTCGCCGAGCTCCGCGCCCCGAGGGCCTGCCGGCC                                  |        |        |        |                                            |                        |
| 141110                                                                              | 141129 | 137091 | 141431 | CDS product transcriptional regulator ICP4 | 141110-141129 4:01:01  |
| CCCGACGCCGAGGCCGCCCC                                                                |        |        |        |                                            |                        |
| 141141                                                                              | 141178 | 137091 | 141431 | CDS product transcriptional regulator ICP4 | 141141-141178 7:04:01  |
| CCCCGGGCGCCGTCGCCGCCGGCGGCGCCCCGCCGGCC                                              |        |        |        |                                            |                        |
| 141195                                                                              | 141283 | 137091 | 141431 | CDS product transcriptional regulator ICP4 | 141195-141283 15:12:03 |
| CCCCCTTCGAGACCAGCGTCCGCGCCGCCGGGGGCGCCGTGGAGACCCACCGGCCGCGGGGCTCGGGCGCCGGGGCCGGCCCC |        |        |        |                                            |                        |
| 141249                                                                              | 141305 | 137091 | 141431 | CDS product transcriptional regulator ICP4 | 141249-141305 10:07:02 |
| GGCCCCGCGGGGCTCGGGCGCCGGGCGGCCCGCGGAGGACGGGACTCTGTGG                                |        |        |        |                                            |                        |
| 141314                                                                              | 141355 | 137091 | 141431 | CDS product transcriptional regulator ICP4 | 141314-141355 7:04:01  |
| GGCGTCCGCGGCGGACGGCCGGCCCCGCGGCCGCTCGGG                                             |        |        |        |                                            |                        |
| 141334                                                                              | 141358 | 137091 | 141431 | CDS product transcriptional regulator ICP4 | 141334-141358 4:01:01  |
| CCGGCCCCGCGGCCGCTCGGGCCC                                                            |        |        |        |                                            |                        |
| 141364                                                                              | 141405 | 137091 | 141431 | CDS product transcriptional regulator ICP4 | 141364-141405 8:05:02  |
| GGTGGAGGCCATCTCGGACGACGAGGAGGCCGAGGACGCCGG                                          |        |        |        |                                            |                        |
| 141393                                                                              | 141425 | 137091 | 141431 | CDS product transcriptional regulator ICP4 | 141393-141425 5:02:01  |
| CCGAGGACGCCGCAACCCCTACCTGCTGCTCC                                                    |        |        |        |                                            |                        |

|                                                                    |      |     |      |                                   |                                                            |
|--------------------------------------------------------------------|------|-----|------|-----------------------------------|------------------------------------------------------------|
| gi 216905852 ref NC_011644.1  Equid herpesvirus 9, complete genome |      |     |      |                                   |                                                            |
| 873                                                                | 915  | 848 | 1456 | CDS product membrane protein UL56 | 873-915 9:06:02 CCGCGCCTCCTCTGTCTCCATCTCCATGTGCCACCGCCACCC |
| 1043                                                               | 1083 | 848 | 1456 | CDS product membrane protein UL56 | 1043-1083 7:04:01                                          |

|                                           |      |      |      |                                                  |           |                                   |
|-------------------------------------------|------|------|------|--------------------------------------------------|-----------|-----------------------------------|
| CCAGAAGCTCCAGCCTGCCTTCTACCGGCTCCCTGAGATCC |      |      |      |                                                  |           |                                   |
| 1108                                      | 1131 | 848  | 1456 | CDS product membrane protein UL56                | 1108-1131 | 5:02:01 CCGTCGAGGCCGCCGTCTACACC   |
| 1172                                      | 1189 | 848  | 1456 | CDS product membrane protein UL56                | 1172-1189 | 4:01:01 GGCCGCGGGCGTGGACGG        |
| 1226                                      | 1245 | 848  | 1456 | CDS product membrane protein UL56                | 1226-1245 | 4:01:01 CCCTGTGCCAGGCTCCGCCC      |
| 1320                                      | 1332 | 848  | 1456 | CDS product membrane protein UL56                | 1320-1332 | 4:01:01 CCCCCACCAGCCC             |
| 1503                                      | 1519 | 1495 | 2109 | CDS product membrane protein V1                  | 1503-1519 | 4:01:01 CCCCTTTCCAAACCCCC         |
| 1758                                      | 1782 | 1495 | 2109 | CDS product membrane protein V1                  | 1758-1782 | 4:01:01 GGCATCGGTACAGCGGCCCGTGGGG |
| 1895                                      | 1911 | 1495 | 2109 | CDS product membrane protein V1                  | 1895-1911 | 4:01:01 CCGGACCCTGCCAGGCC         |
| 1908                                      | 1924 | 1495 | 2109 | CDS product membrane protein V1                  | 1908-1924 | 4:01:01 GGCCGACGGGGGAAGG          |
| 2663                                      | 2689 | 2386 | 3159 | CDS product myristylated tegument protein CIRC   | 2663-2689 | 5:02:01                           |
| GGTCTTTGGCTACGAGGACGGTACCGG               |      |      |      |                                                  |           |                                   |
| 2882                                      | 2917 | 2386 | 3159 | CDS product myristylated tegument protein CIRC   | 2882-2917 | 6:03:01                           |
| CCTACTGGGCCACACCAAGAGCTCCACGCACCGTCC      |      |      |      |                                                  |           |                                   |
| 2958                                      | 2987 | 2386 | 3159 | CDS product myristylated tegument protein CIRC   | 2958-2987 | 5:02:01                           |
| CCCCCACGCAACCGAGTAGCCAAAGGCC              |      |      |      |                                                  |           |                                   |
| 2983                                      | 3001 | 2386 | 3159 | CDS product myristylated tegument protein CIRC   | 2983-3001 | 4:01:01                           |
| GGCCCAAAGGTAAGGGAGG                       |      |      |      |                                                  |           |                                   |
| 4051                                      | 4074 | 4014 | 5426 | CDS product multifunctional expression regulator | 4051-4074 | 4:01:01                           |
| GGTAAACCGGAAGTAGGGTGTAGG                  |      |      |      |                                                  |           |                                   |
| 4941                                      | 4957 | 4014 | 5426 | CDS product multifunctional expression regulator | 4941-4957 | 4:01:01                           |
| CCCGCGCCGCCATGTCC                         |      |      |      |                                                  |           |                                   |
| 5021                                      | 5054 | 4014 | 5426 | CDS product multifunctional expression regulator | 5021-5054 | 5:02:01                           |
| CCGCTTTGGCCAGCTCCGCGCTGCCTGGTGCGCC        |      |      |      |                                                  |           |                                   |

|                                         |      |      |      |                                                  |           |           |                          |
|-----------------------------------------|------|------|------|--------------------------------------------------|-----------|-----------|--------------------------|
| 5141                                    | 5160 | 4014 | 5426 | CDS product multifunctional expression regulator |           | 5141-5160 | 4:01:01                  |
| CCCCTGGCCAAACGCCGGCC                    |      |      |      |                                                  |           |           |                          |
| 5720                                    | 5739 | 5560 | 6591 | CDS product envelope glycoprotein K              | 5720-5739 | 6:03:01   | GGGTGGCGGGGGTTGGAGGG     |
| 6569                                    | 6581 | 5560 | 6591 | CDS product envelope glycoprotein K              | 6569-6581 | 4:01:01   | CCGTCCTACCCCC            |
| 6921                                    | 6937 | 6605 | 9844 | CDS product helicase-primase primase subunit     |           | 6921-6937 | 4:01:01                  |
| CCACCTCACCGAGCACC                       |      |      |      |                                                  |           |           |                          |
| 7223                                    | 7249 | 6605 | 9844 | CDS product helicase-primase primase subunit     |           | 7223-7249 | 5:02:01                  |
| CCTCCATAAACCTCACCAGAGTCGCCC             |      |      |      |                                                  |           |           |                          |
| 7265                                    | 7282 | 6605 | 9844 | CDS product helicase-primase primase subunit     |           | 7265-7282 | 4:01:01                  |
| GGAAGGCGAAGGCTGCGG                      |      |      |      |                                                  |           |           |                          |
| 7401                                    | 7440 | 6605 | 9844 | CDS product helicase-primase primase subunit     |           | 7401-7440 | 9:06:02                  |
| GGGCTTCCGGTCCGGCCAGGAGGTAAGGGGCGGCACTGG |      |      |      |                                                  |           |           |                          |
| 8166                                    | 8183 | 6605 | 9844 | CDS product helicase-primase primase subunit     |           | 8166-8183 | 4:01:01                  |
| GGCGCTTGAAGGCAGGG                       |      |      |      |                                                  |           |           |                          |
| 8207                                    | 8226 | 6605 | 9844 | CDS product helicase-primase primase subunit     |           | 8207-8226 | 4:01:01                  |
| CCGGAACCCCTTTTGCC                       |      |      |      |                                                  |           |           |                          |
| 8410                                    | 8425 | 6605 | 9844 | CDS product helicase-primase primase subunit     |           | 8410-8425 | 4:01:01 CCAGCCGCGGCCCGCC |
| 8995                                    | 9012 | 6605 | 9844 | CDS product helicase-primase primase subunit     |           | 8995-9012 | 4:01:01                  |
| GGGGTTTGGTGCGGCCGG                      |      |      |      |                                                  |           |           |                          |
| 9043                                    | 9074 | 6605 | 9844 | CDS product helicase-primase primase subunit     |           | 9043-9074 | 5:02:01                  |
| GGCCTGCAGGTCGTAGGTGCCCCGGATCTGG         |      |      |      |                                                  |           |           |                          |
| 9465                                    | 9485 | 6605 | 9844 | CDS product helicase-primase primase subunit     |           | 9465-9485 | 4:01:01                  |
| CCAACGCCCGGGCTCCCGTCC                   |      |      |      |                                                  |           |           |                          |

|                                           |       |       |       |                                                   |             |         |                              |
|-------------------------------------------|-------|-------|-------|---------------------------------------------------|-------------|---------|------------------------------|
| 9545                                      | 9558  | 6605  | 9844  | CDS product helicase-primase primase subunit      | 9545-9558   | 4:01:01 | CCTCCCACCATACC               |
| 9643                                      | 9661  | 6605  | 9844  | CDS product helicase-primase primase subunit      | 9643-9661   | 4:01:01 |                              |
| CCAACCGTCACCAGTGTCC                       |       |       |       |                                                   |             |         |                              |
| 9928                                      | 9955  | 9843  | 10580 | CDS product tegument protein UL51                 | 9928-9955   | 5:02:01 | CCCGGCTACCATGCTCCGCCTACAGTCC |
| 10119                                     | 10141 | 9843  | 10580 | CDS product tegument protein UL51                 | 10119-10141 | 4:01:01 | CCGACAACCCGAACCTGAACGCC      |
| 10185                                     | 10208 | 9843  | 10580 | CDS product tegument protein UL51                 | 10185-10208 | 4:01:01 | CCTGCCTCGCGGCCCTAATGCACC     |
| 10690                                     | 10710 | 10685 | 11665 | CDS product deoxyuridine triphosphatase           | 10690-10710 | 4:01:01 | CCCGTTGAGCCAAACCTCC          |
| 11680                                     | 11721 | 11634 | 11936 | CDS product envelope glycoprotein N               | 11680-11721 | 8:05:02 |                              |
| GGTGGTGCTTGGTCTGGCTAGAGGGCTGGTGGCGACCTAGG |       |       |       |                                                   |             |         |                              |
| 11871                                     | 11890 | 11634 | 11936 | CDS product envelope glycoprotein N               | 11871-11890 | 4:01:01 | CCTGCCAGGCATACCGCGCC         |
| 12414                                     | 12425 | 12098 | 13015 | CDS product tegument protein VP22                 | 12414-12425 | 4:01:01 | GGTTGGCGGTGG                 |
| 12437                                     | 12459 | 12098 | 13015 | CDS product tegument protein VP22                 | 12437-12459 | 5:02:01 | CCTCCCATGGCCGCCAAAGCCCC      |
| 12494                                     | 12524 | 12098 | 13015 | CDS product tegument protein VP22                 | 12494-12524 | 6:03:01 |                              |
| CCGCACCACCCACGTTCCAACGCGACC               |       |       |       |                                                   |             |         |                              |
| 12895                                     | 12921 | 12098 | 13015 | CDS product tegument protein VP22                 | 12895-12921 | 4:01:01 | GGATACGCGGCAGCTGGGCCCAACGGG  |
| 13269                                     | 13293 | 13149 | 14498 | CDS product transactivating tegument protein VP16 | 13269-13293 | 4:01:01 |                              |
| CCATCGAGTCCGTTTATCCAGTCC                  |       |       |       |                                                   |             |         |                              |
| 13316                                     | 13339 | 13149 | 14498 | CDS product transactivating tegument protein VP16 | 13316-13339 | 6:03:01 |                              |
| CCACCGCCCAAGGCCGCCAGCCCC                  |       |       |       |                                                   |             |         |                              |
| 13356                                     | 13386 | 13149 | 14498 | CDS product transactivating tegument protein VP16 | 13356-13386 | 5:02:01 |                              |
| GGCTACAAGGCGAGCTGGGTTTCCCGGAGGG           |       |       |       |                                                   |             |         |                              |
| 13526                                     | 13549 | 13149 | 14498 | CDS product transactivating tegument protein VP16 | 13526-13549 | 4:01:01 |                              |
| CCCACTCCCAGCCACTATAGCCCC                  |       |       |       |                                                   |             |         |                              |

|                                                     |       |       |       |                                                   |                                              |
|-----------------------------------------------------|-------|-------|-------|---------------------------------------------------|----------------------------------------------|
| 13580                                               | 13601 | 13149 | 14498 | CDS product transactivating tegument protein VP16 | 13580-13601 4:01:01                          |
| CCCTTCCCAGAGGTTCCAGCCC                              |       |       |       |                                                   |                                              |
| 13816                                               | 13837 | 13149 | 14498 | CDS product transactivating tegument protein VP16 | 13816-13837 4:01:01                          |
| CCGCGAGGCCGCTAACCTGGCC                              |       |       |       |                                                   |                                              |
| 13884                                               | 13904 | 13149 | 14498 | CDS product transactivating tegument protein VP16 | 13884-13904 4:01:01                          |
| CCTGGCGCCTGCATGCCAGCC                               |       |       |       |                                                   |                                              |
| 14317                                               | 14368 | 13149 | 14498 | CDS product transactivating tegument protein VP16 | 14317-14368 10:07:02                         |
| CCCGCCCTCCCCAGCGCCGTGCTACCCGGTGACCCGGTCCCACCTCTTACC |       |       |       |                                                   |                                              |
| 15148                                               | 15176 | 14871 | 17477 | CDS product tegument protein VP13/14              | 15148-15176 4:01:01                          |
| CCCCGCACAGCCACAAGCACCCAGACCCC                       |       |       |       |                                                   |                                              |
| 15220                                               | 15237 | 14871 | 17477 | CDS product tegument protein VP13/14              | 15220-15237 4:01:01 GGAAGAGGAGGAAGATGG       |
| 15392                                               | 15413 | 14871 | 17477 | CDS product tegument protein VP13/14              | 15392-15413 4:01:01 GGTGAAATGGGAGCCGGGGCGG   |
| 15727                                               | 15743 | 14871 | 17477 | CDS product tegument protein VP13/14              | 15727-15743 4:01:01 GGGGGACTACATGGAGG        |
| 15834                                               | 15849 | 14871 | 17477 | CDS product tegument protein VP13/14              | 15834-15849 4:01:01 CCAACCACCAACCC           |
| 16320                                               | 16343 | 14871 | 17477 | CDS product tegument protein VP13/14              | 16320-16343 5:02:01 GGGAGAGGCGAAAGGAAACGGGGG |
| 16605                                               | 16630 | 14871 | 17477 | CDS product tegument protein VP13/14              | 16605-16630 4:01:01                          |
| CCCACTCCGCAAGTCCCAGCTACACC                          |       |       |       |                                                   |                                              |
| 16642                                               | 16655 | 14871 | 17477 | CDS product tegument protein VP13/14              | 16642-16655 4:01:01 GGTGGCAATGGAGG           |
| 16984                                               | 17004 | 14871 | 17477 | CDS product tegument protein VP13/14              | 16984-17004 4:01:01 GGGGGTGTTTTGGGCGTGGG     |
| 17005                                               | 17033 | 14871 | 17477 | CDS product tegument protein VP13/14              | 17005-17033 6:03:01                          |
| CCTAATCCTTCAGCGCCTGGCCGCCACC                        |       |       |       |                                                   |                                              |
| 17219                                               | 17240 | 14871 | 17477 | CDS product tegument protein VP13/14              | 17219-17240 5:02:01 CCGCGACCGGTCCTCCTACCC    |
| 17321                                               | 17351 | 14871 | 17477 | CDS product tegument protein VP13/14              | 17321-17351 6:03:01                          |

|                                 |       |       |       |                                                 |                                            |
|---------------------------------|-------|-------|-------|-------------------------------------------------|--------------------------------------------|
| GGCGCAGGCCTGGGCCGCATGGTGGACCTGG |       |       |       |                                                 |                                            |
| 17397                           | 17407 | 14871 | 17477 | CDS product tegument protein VP13/14            | 17397-17407 4:01:01 CCACCTCCTCC            |
| 17629                           | 17640 | 17628 | 19862 | CDS product tegument protein VP11/12            | 17629-17640 4:01:01 GGACGGAGGGGG           |
| 17986                           | 18007 | 17628 | 19862 | CDS product tegument protein VP11/12            | 17986-18007 4:01:01 CCTCCGAGAGTCCAGCGGCGCC |
| 18023                           | 18038 | 17628 | 19862 | CDS product tegument protein VP11/12            | 18023-18038 4:01:01 GGCGCGGTGGGCCAGG       |
| 18465                           | 18478 | 17628 | 19862 | CDS product tegument protein VP11/12            | 18465-18478 4:01:01 CCACCGCCGACGCC         |
| 18642                           | 18659 | 17628 | 19862 | CDS product tegument protein VP11/12            | 18642-18659 4:01:01 GGCTCGATGGCGGCGTGG     |
| 18944                           | 18973 | 17628 | 19862 | CDS product tegument protein VP11/12            | 18944-18973 6:03:01                        |
| CCTCCCCAAGGGCCGCTACCGCACCCCC    |       |       |       |                                                 |                                            |
| 19268                           | 19288 | 17628 | 19862 | CDS product tegument protein VP11/12            | 19268-19288 4:01:01 CCCTCAACTCCATCGCCAACC  |
| 19305                           | 19324 | 17628 | 19862 | CDS product tegument protein VP11/12            | 19305-19324 4:01:01 CCGATCCGCTCCTGGGGCCC   |
| 19544                           | 19561 | 17628 | 19862 | CDS product tegument protein VP11/12            | 19544-19561 4:01:01 CCACCAGCCAATTCTCCC     |
| 19572                           | 19582 | 17628 | 19862 | CDS product tegument protein VP11/12            | 19572-19582 4:01:01 CCGCCGCCTCC            |
| 20555                           | 20584 | 20016 | 20699 | CDS product membrane protein UL45               | 20555-20584 7:04:01                        |
| GGTGGGTGTAGGGGAGTTGGCAGTGGGG    |       |       |       |                                                 |                                            |
| 21799                           | 21811 | 20971 | 22377 | CDS product envelope glycoprotein C             | 21799-21811 4:01:01 CCGGCCGTCCGCC          |
| 22679                           | 22694 | 22555 | 23760 | CDS product envelope protein UL43               | 22679-22694 4:01:01 CCCCCAATATGCCCCC       |
| 22769                           | 22789 | 22555 | 23760 | CDS product envelope protein UL43               | 22769-22789 4:01:01 GGGCCGTGGAGTGGATGCCGG  |
| 23411                           | 23439 | 22555 | 23760 | CDS product envelope protein UL43               | 23411-23439 5:02:01                        |
| CCGATCCCGCGACCCAGACACCGGCGGCC   |       |       |       |                                                 |                                            |
| 24207                           | 24227 | 24005 | 25225 | CDS product DNA polymerase processivity subunit | 24207-24227 5:02:01                        |
| GGCACGGCTGGGTCGGGTAGG           |       |       |       |                                                 |                                            |
| 26493                           | 26514 | 25789 | 27282 | CDS product tegument host shutoff protein       | 26493-26514 5:02:01                        |



|                                                     |       |       |       |                                                |                                          |
|-----------------------------------------------------|-------|-------|-------|------------------------------------------------|------------------------------------------|
| CCGCTGTTTCCCCAACCTCC                                |       |       |       |                                                |                                          |
| 26582                                               | 26610 | 25789 | 27282 | CDS product tegument host shutoff protein      | 26582-26610 5:02:01                      |
| CCACACGGACCTCCACGAGCCCCAAACCC                       |       |       |       |                                                |                                          |
| 26884                                               | 26911 | 25789 | 27282 | CDS product tegument host shutoff protein      | 26884-26911 6:03:01                      |
| GGCCTCGGCGGTCCGTGGAGGCCTCCGG                        |       |       |       |                                                |                                          |
| 26991                                               | 27006 | 25789 | 27282 | CDS product tegument host shutoff protein      | 26991-27006 4:01:01 CCCCCAAAACCCGCC      |
| 27092                                               | 27112 | 25789 | 27282 | CDS product tegument host shutoff protein      | 27092-27112 4:01:01                      |
| CCTACCCATCACCCAGGAGCC                               |       |       |       |                                                |                                          |
| 27131                                               | 27174 | 25789 | 27282 | CDS product tegument host shutoff protein      | 27131-27174 6:03:01                      |
| CCACGATACCCTTAGAAACCTGGTCTCCGAACCCGAGATTGCCC        |       |       |       |                                                |                                          |
| 27905                                               | 27955 | 27424 | 28389 | CDS product ribonucleotide reductase subunit 2 | 27905-27955 10:07:02                     |
| CCGCCACCGATCCACATTCCCGCACCTTTGCCTGTAGCCAGGCAACCTTCC |       |       |       |                                                |                                          |
| 30065                                               | 30086 | 28431 | 30803 | CDS product ribonucleotide reductase subunit 1 | 30065-30086 4:01:01                      |
| CCCGGCCTCTTCCATCAGAGCC                              |       |       |       |                                                |                                          |
| 30196                                               | 30212 | 28431 | 30803 | CDS product ribonucleotide reductase subunit 1 | 30196-30212 4:01:01                      |
| CCTGTCCAGCCAGCGCC                                   |       |       |       |                                                |                                          |
| 30239                                               | 30272 | 28431 | 30803 | CDS product ribonucleotide reductase subunit 1 | 30239-30272 6:03:01                      |
| CCAGCCTACTTCCCCGCTGACCACCACGCGTGCC                  |       |       |       |                                                |                                          |
| 30678                                               | 30696 | 28431 | 30803 | CDS product ribonucleotide reductase subunit 1 | 30678-30696 4:01:01                      |
| GGGCGGGGAGGCAGCGTGG                                 |       |       |       |                                                |                                          |
| 31061                                               | 31081 | 31045 | 32442 | CDS product capsid triplex subunit 1           | 31061-31081 4:01:01 CCAATCCTGTGGGTCCCACC |
| 31149                                               | 31176 | 31045 | 32442 | CDS product capsid triplex subunit 1           | 31149-31176 5:02:01                      |
| GGGGGAGTCTGAGGCTATGGCCCCCAGG                        |       |       |       |                                                |                                          |

31316 31355 31045 32442 CDS product capsid triplex subunit 1  
 GGTCTGGAGCGGGAGGGCGGCGTTTGGGTGCGGCTCTGG  
 31457 31479 31045 32442 CDS product capsid triplex subunit 1  
 31630 31646 31045 32442 CDS product capsid triplex subunit 1  
 31653 31666 31045 32442 CDS product capsid triplex subunit 1  
 31859 31878 31045 32442 CDS product capsid triplex subunit 1  
 31905 31971 31045 32442 CDS product capsid triplex subunit 1  
 CCGCAGCCCCGTCGTATCCGAGCGACCGACACCGAGAGTTCCGCCAGCGCGGCCAGGCCTCGTCC  
 32022 32063 31045 32442 CDS product capsid triplex subunit 1  
 GGCATCGAGGTGTTACGGAGGCGGATTATCGGAAGTCCTGG  
 32895 32913 32819 35884 CDS product tegument protein UL37  
 32967 32989 32819 35884 CDS product tegument protein UL37  
 33110 33136 32819 35884 CDS product tegument protein UL37  
 33460 33484 32819 35884 CDS product tegument protein UL37  
 33902 33942 32819 35884 CDS product tegument protein UL37  
 CCAGTAACACCTGGGAGACCATCCAGGCCAGCACGACCCCC  
 33994 34018 32819 35884 CDS product tegument protein UL37  
 34099 34121 32819 35884 CDS product tegument protein UL37  
 34227 34255 32819 35884 CDS product tegument protein UL37  
 GGCCCTGGGGCTGGCGACAAGGGAGTGG  
 34697 34719 32819 35884 CDS product tegument protein UL37  
 34799 34824 32819 35884 CDS product tegument protein UL37  
 34833 34849 32819 35884 CDS product tegument protein UL37

31316-31355 8:05:02  
 31457-31479 5:02:01 CCGCCACGTACACCCTCACCCCC  
 31630-31646 4:01:01 CCCTCCTGAACACCCCC  
 31653-31666 4:01:01 GGCGGTGAGGCTGG  
 31859-31878 4:01:01 CCGCGGACCTGGATGCCACC  
 31905-31971 10:07:02  
 32022-32063 8:05:02  
 32895-32913 4:01:01 CCGCAGCCTCGAGCCTGCC  
 32967-32989 5:02:01 GGTGTCGGTGGACGAGGCCGCGG  
 33110-33136 7:04:01 GGACGGACAGGGAATGGAGGCGGTGG  
 33460-33484 4:01:01 GGCCTCATGGTCAAGGGATACAAGG  
 33902-33942 7:04:01  
 33994-34018 5:02:01 GGAATTTTGGAGCGCGTGGTGGTGG  
 34099-34121 4:01:01 GGTTGCGTGGCTATAGTGGGTGG  
 34227-34255 6:03:01  
 34697-34719 4:01:01 GGGCCAGGGACTACGGCGCTGGG  
 34799-34824 5:02:01 CCCCTACCCCAACCATGGCCCATGCC  
 34833-34849 4:01:01 GGAGGCGCTTTTGGGGG

|                                       |       |       |       |                                    |             |                                     |
|---------------------------------------|-------|-------|-------|------------------------------------|-------------|-------------------------------------|
| 35155                                 | 35192 | 32819 | 35884 | CDS product tegument protein UL37  | 35155-35192 | 7:04:01                             |
| GGTAGGTGGCGTCTGGTAGACGTGGTCGACGCGTTGG |       |       |       |                                    |             |                                     |
| 35271                                 | 35305 | 32819 | 35884 | CDS product tegument protein UL37  | 35271-35305 | 6:03:01                             |
| GGCCGCGGAGGCACTGCAGGAGTGCAGGCCCTGG    |       |       |       |                                    |             |                                     |
| 35373                                 | 35391 | 32819 | 35884 | CDS product tegument protein UL37  | 35373-35391 | 4:01:01 GGCCAGGGCCCAGAGGGG          |
| 35419                                 | 35438 | 32819 | 35884 | CDS product tegument protein UL37  | 35419-35438 | 4:01:01 GGGGTTCCGAGGCTCCAGG         |
| 36132                                 | 36166 | 36113 | 46432 | CDS product large tegument protein | 36132-36166 | 6:03:01                             |
| GGCGAATAAGGCGGGTGGCGCTCAGGCCGATGTGG   |       |       |       |                                    |             |                                     |
| 36574                                 | 36592 | 36113 | 46432 | CDS product large tegument protein | 36574-36592 | 4:01:01 GGGGCTACTGGTCTGGCGG         |
| 36898                                 | 36912 | 36113 | 46432 | CDS product large tegument protein | 36898-36912 | 4:01:01 CCCCCACCGCTAACC             |
| 36918                                 | 36945 | 36113 | 46432 | CDS product large tegument protein | 36918-36945 | 7:04:01 GGCTGTGGGGCGGTTTCGGAGGCGTGG |
| 37084                                 | 37104 | 36113 | 46432 | CDS product large tegument protein | 37084-37104 | 5:02:01 CCCCCGTGGACGCCTCCACC        |
| 37267                                 | 37287 | 36113 | 46432 | CDS product large tegument protein | 37267-37287 | 4:01:01 CCCGTCCAGGCCGTAGGCGCC       |
| 37382                                 | 37396 | 36113 | 46432 | CDS product large tegument protein | 37382-37396 | 4:01:01 GGCTCTCGGGGAGG              |
| 37602                                 | 37620 | 36113 | 46432 | CDS product large tegument protein | 37602-37620 | 4:01:01 GGTGAAAACGGCACGCGG          |
| 37676                                 | 37692 | 36113 | 46432 | CDS product large tegument protein | 37676-37692 | 4:01:01 CCATTCCTACCCAATCC           |
| 37851                                 | 37879 | 36113 | 46432 | CDS product large tegument protein | 37851-37879 | 5:02:01                             |
| GGAGCTCGTGTTAAGGTTGAGGAATTGG          |       |       |       |                                    |             |                                     |
| 37974                                 | 38004 | 36113 | 46432 | CDS product large tegument protein | 37974-38004 | 5:02:01                             |
| CCTATTTGCCGAGAACCGAAACCGGGGGCC        |       |       |       |                                    |             |                                     |
| 38214                                 | 38241 | 36113 | 46432 | CDS product large tegument protein | 38214-38241 | 6:03:01 CCTCTCCGCCGTTCTACCCGCGTAGCC |
| 38457                                 | 38472 | 36113 | 46432 | CDS product large tegument protein | 38457-38472 | 4:01:01 CCAGGGACCCCCACCC            |
| 38805                                 | 38821 | 36113 | 46432 | CDS product large tegument protein | 38805-38821 | 4:01:01 GGCAAAGGTGGTCGAGG           |

|                                                      |       |       |       |                                    |
|------------------------------------------------------|-------|-------|-------|------------------------------------|
| 39165                                                | 39190 | 36113 | 46432 | CDS product large tegument protein |
| 39192                                                | 39208 | 36113 | 46432 | CDS product large tegument protein |
| 39635                                                | 39648 | 36113 | 46432 | CDS product large tegument protein |
| 39656                                                | 39673 | 36113 | 46432 | CDS product large tegument protein |
| 39911                                                | 39932 | 36113 | 46432 | CDS product large tegument protein |
| 40446                                                | 40474 | 36113 | 46432 | CDS product large tegument protein |
| GGTCGCGGAAAAGGTTTGGCCGAAGGGG                         |       |       |       |                                    |
| 40499                                                | 40525 | 36113 | 46432 | CDS product large tegument protein |
| 40791                                                | 40810 | 36113 | 46432 | CDS product large tegument protein |
| 40869                                                | 40890 | 36113 | 46432 | CDS product large tegument protein |
| 41051                                                | 41067 | 36113 | 46432 | CDS product large tegument protein |
| 41196                                                | 41207 | 36113 | 46432 | CDS product large tegument protein |
| 41508                                                | 41526 | 36113 | 46432 | CDS product large tegument protein |
| 41846                                                | 41863 | 36113 | 46432 | CDS product large tegument protein |
| 42020                                                | 42038 | 36113 | 46432 | CDS product large tegument protein |
| 42433                                                | 42451 | 36113 | 46432 | CDS product large tegument protein |
| 42452                                                | 42504 | 36113 | 46432 | CDS product large tegument protein |
| CCGCAGCCAAGATAGCCTCCGCCATTCCCGGAAACCCCTAGCCACCTTTACC |       |       |       |                                    |
| 42629                                                | 42648 | 36113 | 46432 | CDS product large tegument protein |
| 42651                                                | 42664 | 36113 | 46432 | CDS product large tegument protein |
| 43213                                                | 43235 | 36113 | 46432 | CDS product large tegument protein |
| 43419                                                | 43438 | 36113 | 46432 | CDS product large tegument protein |
| 43491                                                | 43518 | 36113 | 46432 | CDS product large tegument protein |

|             |          |                             |
|-------------|----------|-----------------------------|
| 39165-39190 | 5:02:01  | CCCAAACCTCCACTACCTCATCCGCCC |
| 39192-39208 | 4:01:01  | GGCGGGAGTGGGCCCGG           |
| 39635-39648 | 4:01:01  | CCGCCGCCACTGCC              |
| 39656-39673 | 4:01:01  | GGGAGCTGGCGAGGCTGG          |
| 39911-39932 | 4:01:01  | GGGACCTCGGTGCGGCTCGCGG      |
| 40446-40474 | 5:02:01  |                             |
|             |          |                             |
| 40499-40525 | 4:01:01  | CCCTGATAGCCAAAGCCCTTAAGTACC |
| 40791-40810 | 4:01:01  | GGACAAGGCTACCTCGGCGG        |
| 40869-40890 | 4:01:01  | GGACATTAAGCCGTGGAGTGG       |
| 41051-41067 | 4:01:01  | GGGATGAGGCGTGGGGG           |
| 41196-41207 | 4:01:01  | CCGCCTACCCCC                |
| 41508-41526 | 5:02:01  | CCGCCCCACCTGGAAGCC          |
| 41846-41863 | 4:01:01  | GGTTTGGACTGGAAAAGG          |
| 42020-42038 | 4:01:01  | GGTTCATGGCGGGTTCGGG         |
| 42433-42451 | 4:01:01  | GGCGAAAGCGGACGGGCGG         |
| 42452-42504 | 11:08:02 |                             |
|             |          |                             |
| 42629-42648 | 4:01:01  | CCTCTACCGTACAGACCTCC        |
| 42651-42664 | 4:01:01  | GGCGGTGGACCCGG              |
| 43213-43235 | 4:01:01  | CCTCCGATGAACCCGGATGACCC     |
| 43419-43438 | 4:01:01  | GGAGGACCCAACGGGTATGG        |
| 43491-43518 | 6:03:01  | GGCGTGGCAAGAGTGTTGGAGGATGGG |

|       |                                                                                                                             |       |       |       |                                             |             |          |                            |
|-------|-----------------------------------------------------------------------------------------------------------------------------|-------|-------|-------|---------------------------------------------|-------------|----------|----------------------------|
|       | 43547                                                                                                                       | 43580 | 36113 | 46432 | CDS product large tegument protein          | 43547-43580 | 7:04:01  |                            |
|       | CCAACGCCATACCAGCGCCCCCAAACCTACTCC                                                                                           |       |       |       |                                             |             |          |                            |
| 43724 | 43787                                                                                                                       | 36113 | 46432 |       | CDS product large tegument protein          | 43724-43787 | 15:12:03 |                            |
|       | CCGTTCCCCTTTCGTACCTGCTCCTCCACCCCTTCCACCCGCTCCCCCTCTGCCCCAACCCCC                                                             |       |       |       |                                             |             |          |                            |
| 44068 | 44106                                                                                                                       | 36113 | 46432 |       | CDS product large tegument protein          | 44068-44106 | 8:05:02  |                            |
|       | CCAGTTCCACCCACCGATAAGCCGTAACCACCACTCCC                                                                                      |       |       |       |                                             |             |          |                            |
| 44266 | 44285                                                                                                                       | 36113 | 46432 |       | CDS product large tegument protein          | 44266-44285 | 5:02:01  | CCGGAGCCAAACCACCCCC        |
| 44459 | 44517                                                                                                                       | 36113 | 46432 |       | CDS product large tegument protein          | 44459-44517 | 11:08:02 |                            |
|       | CCCAATCAACCAAGGAGCCCCAAAAGCCTGCCGTAGAGGCCCCGCCGGCCCCGGCC                                                                    |       |       |       |                                             |             |          |                            |
| 44630 | 44656                                                                                                                       | 36113 | 46432 |       | CDS product large tegument protein          | 44630-44656 | 6:03:01  | CCCCGCCGCGGCCCCGGCCAAAGACC |
| 44688 | 44797                                                                                                                       | 36113 | 46432 |       | CDS product large tegument protein          | 44688-44797 | 19:16:04 |                            |
|       | GGCCAAGGACCAGGCCAAGGACCAGGCCAAGGACCAGGCCAAGGACCAGGCCAAGGACCAGGCCAAGGACCAGGCCAAGGACCAGGCCAAGGACCAGGCCAAGGACCAGGCCAAGGACCAGGC |       |       |       |                                             |             |          |                            |
| 45138 | 45178                                                                                                                       | 36113 | 46432 |       | CDS product large tegument protein          | 45138-45178 | 7:04:01  |                            |
|       | CCCATTGCCCGATTCTCCCACCGACGAACCTCCAGCGGCC                                                                                    |       |       |       |                                             |             |          |                            |
| 45514 | 45527                                                                                                                       | 36113 | 46432 |       | CDS product large tegument protein          | 45514-45527 | 4:01:01  | CCGGCCACCATTCC             |
| 45676 | 45728                                                                                                                       | 36113 | 46432 |       | CDS product large tegument protein          | 45676-45728 | 11:08:02 |                            |
|       | CCTCAGCCGCCACCAGCAAACCAGACACCACCGCTCACGAACCCCCAGCACC                                                                        |       |       |       |                                             |             |          |                            |
| 47098 | 47117                                                                                                                       | 46982 | 47809 |       | CDS product nuclear egress membrane protein | 47098-47117 | 4:01:01  | GGAGATGCTGGTAAGGCTGG       |
| 47124 | 47138                                                                                                                       | 46982 | 47809 |       | CDS product nuclear egress membrane protein | 47124-47138 | 4:01:01  | CCTCCGCCGCGCACC            |
| 47386 | 47406                                                                                                                       | 46982 | 47809 |       | CDS product nuclear egress membrane protein | 47386-47406 | 5:02:01  |                            |
|       | CCTCAGGTCCAGGCCTCCCCC                                                                                                       |       |       |       |                                             |             |          |                            |
| 47677 | 47694                                                                                                                       | 46982 | 47809 |       | CDS product nuclear egress membrane protein | 47677-47694 | 4:01:01  | GGCTGGTAGGTGTTGGG          |
| 47768 | 47779                                                                                                                       | 46982 | 47809 |       | CDS product nuclear egress membrane protein | 47768-47779 | 4:01:01  | CCACCACCGACC               |

|                                            |       |       |       |                                              |                                            |
|--------------------------------------------|-------|-------|-------|----------------------------------------------|--------------------------------------------|
| 48514                                      | 48529 | 48338 | 50200 | CDS product DNA packaging protein UL32       | 48514-48529 4:01:01 CCCACGCCACCGCCCC       |
| 48736                                      | 48753 | 48338 | 50200 | CDS product DNA packaging protein UL32       | 48736-48753 4:01:01 CCGCCGTGTGCCGTGGCC     |
| 48964                                      | 48979 | 48338 | 50200 | CDS product DNA packaging protein UL32       | 48964-48979 4:01:01 GGACCCGGTATGGCGG       |
| 49119                                      | 49145 | 48338 | 50200 | CDS product DNA packaging protein UL32       | 49119-49145 7:04:01                        |
| GGCGGATGGGGGCGGTGGGGTGTGTTGG               |       |       |       |                                              |                                            |
| 49407                                      | 49428 | 48338 | 50200 | CDS product DNA packaging protein UL32       | 49407-49428 4:01:01 CCAGTCCAGTACCTGGGAGGCC |
| 49560                                      | 49579 | 48338 | 50200 | CDS product DNA packaging protein UL32       | 49560-49579 4:01:01 GGACACGGCCACTGGGCCGG   |
| 49806                                      | 49818 | 48338 | 50200 | CDS product DNA packaging protein UL32       | 49806-49818 4:01:01 GGGTGGCGGTGGG          |
| 49954                                      | 49976 | 48338 | 50200 | CDS product DNA packaging protein UL32       | 49954-49976 5:02:01 CCCATAGGCCACCTCCAGAACC |
| 50609                                      | 50635 | 50193 | 51173 | CDS product nuclear egress lamina protein    | 50609-50635 5:02:01                        |
| CCTCGCCTTCACCGCGAGACCGCGCC                 |       |       |       |                                              |                                            |
| 50712                                      | 50746 | 50193 | 51173 | CDS product nuclear egress lamina protein    | 50712-50746 7:04:01                        |
| CCGCCGCCAGGGGACCCTGCCGCGTTGCCGCC           |       |       |       |                                              |                                            |
| 51375                                      | 51406 | 51097 | 54759 | CDS product DNA polymerase catalytic subunit | 51375-51406 6:03:01                        |
| GGAAACATAGGTCGGGTCTTCGGCGAGGTCGG           |       |       |       |                                              |                                            |
| 51427                                      | 51469 | 51097 | 54759 | CDS product DNA polymerase catalytic subunit | 51427-51469 8:05:02                        |
| GGTTGGGGGCGTGCGGTCTTGGTTGCCACGGGGTTGGGGCGG |       |       |       |                                              |                                            |
| 51597                                      | 51612 | 51097 | 54759 | CDS product DNA polymerase catalytic subunit | 51597-51612 4:01:01 GGTGAGGTGCGGCAGG       |
| 51788                                      | 51807 | 51097 | 54759 | CDS product DNA polymerase catalytic subunit | 51788-51807 4:01:01                        |
| CCTCTGCGGCCGCCGTGGCC                       |       |       |       |                                              |                                            |
| 52039                                      | 52056 | 51097 | 54759 | CDS product DNA polymerase catalytic subunit | 52039-52056 4:01:01                        |
| CCCAGCTCCGATACCCCC                         |       |       |       |                                              |                                            |
| 52119                                      | 52140 | 51097 | 54759 | CDS product DNA polymerase catalytic subunit | 52119-52140 4:01:01                        |

|                                        |       |       |       |                                              |                                     |
|----------------------------------------|-------|-------|-------|----------------------------------------------|-------------------------------------|
| GGAGTAAGGCTTGTGGTTTCGG                 |       |       |       |                                              |                                     |
| 52279                                  | 52301 | 51097 | 54759 | CDS product DNA polymerase catalytic subunit | 52279-52301 5:02:01                 |
| CCGTTTGCCACCCCGTGAATCC                 |       |       |       |                                              |                                     |
| 52655                                  | 52681 | 51097 | 54759 | CDS product DNA polymerase catalytic subunit | 52655-52681 4:01:01                 |
| CCTTTGCTCCCTGGTAGCCACGGCCC             |       |       |       |                                              |                                     |
| 52690                                  | 52730 | 51097 | 54759 | CDS product DNA polymerase catalytic subunit | 52690-52730 8:05:02                 |
| CCGGGCTTTCCGCCTCCATTTCCGAAGCCGACCGATCC |       |       |       |                                              |                                     |
| 53050                                  | 53078 | 51097 | 54759 | CDS product DNA polymerase catalytic subunit | 53050-53078 5:02:01                 |
| CCTATCACGCCCCGCCGGTCAGGCCACAC          |       |       |       |                                              |                                     |
| 53589                                  | 53616 | 51097 | 54759 | CDS product DNA polymerase catalytic subunit | 53589-53616 4:01:01                 |
| GGAGATCTGGATAACCAGGTCCTCTTG            |       |       |       |                                              |                                     |
| 53712                                  | 53735 | 51097 | 54759 | CDS product DNA polymerase catalytic subunit | 53712-53735 4:01:01                 |
| GGGGATCGGCTCCAGGTTATCTGG               |       |       |       |                                              |                                     |
| 53807                                  | 53826 | 51097 | 54759 | CDS product DNA polymerase catalytic subunit | 53807-53826 4:01:01                 |
| GGGTGCCGGGCCGAGGCGG                    |       |       |       |                                              |                                     |
| 53942                                  | 53956 | 51097 | 54759 | CDS product DNA polymerase catalytic subunit | 53942-53956 4:01:01 GGCGGCTGCTGGAGG |
| 54055                                  | 54083 | 51097 | 54759 | CDS product DNA polymerase catalytic subunit | 54055-54083 8:05:02                 |
| CCGCCCCACCATCCCCGCCGCTACCGCC           |       |       |       |                                              |                                     |
| 54094                                  | 54117 | 51097 | 54759 | CDS product DNA polymerase catalytic subunit | 54094-54117 5:02:01                 |
| CCTCCGTTGCCATTTCCTCAAGGCC              |       |       |       |                                              |                                     |
| 54197                                  | 54213 | 51097 | 54759 | CDS product DNA polymerase catalytic subunit | 54197-54213 5:02:01                 |
| CCACCTCCGCCTTTGCC                      |       |       |       |                                              |                                     |
| 54406                                  | 54454 | 51097 | 54759 | CDS product DNA polymerase catalytic subunit | 54406-54454 8:05:02                 |

|                                                   |       |       |       |                                                 |                                      |
|---------------------------------------------------|-------|-------|-------|-------------------------------------------------|--------------------------------------|
| CCATCGCCCCGAAAATCCTGGCCGTTCCAAACCCGAATCCTGCGGGGCC |       |       |       |                                                 |                                      |
| 54554                                             | 54565 | 51097 | 54759 | CDS product DNA polymerase catalytic subunit    | 54554-54565 4:01:01 GGTCGGCGGGGG     |
| 54632                                             | 54661 | 51097 | 54759 | CDS product DNA polymerase catalytic subunit    | 54632-54661 5:02:01                  |
| GGGGGGGCTTGGGGCGCTCGGTCTCCGAGG                    |       |       |       |                                                 |                                      |
| 55228                                             | 55244 | 55016 | 58645 | CDS product single-stranded DNA-binding protein | 55228-55244 4:01:01                  |
| GGACTGGGTGGTGCTGG                                 |       |       |       |                                                 |                                      |
| 55331                                             | 55345 | 55016 | 58645 | CDS product single-stranded DNA-binding protein | 55331-55345 4:01:01 CCCCCAACCTCACCC  |
| 55356                                             | 55376 | 55016 | 58645 | CDS product single-stranded DNA-binding protein | 55356-55376 5:02:01                  |
| GGCGGCTAGACGGAGGTTTG                              |       |       |       |                                                 |                                      |
| 55452                                             | 55470 | 55016 | 58645 | CDS product single-stranded DNA-binding protein | 55452-55470 4:01:01                  |
| CCTGTCTCCGGAGACCACC                               |       |       |       |                                                 |                                      |
| 55792                                             | 55813 | 55016 | 58645 | CDS product single-stranded DNA-binding protein | 55792-55813 4:01:01                  |
| GGAGCGGCCACCTGGCCTTG                              |       |       |       |                                                 |                                      |
| 55879                                             | 55901 | 55016 | 58645 | CDS product single-stranded DNA-binding protein | 55879-55901 4:01:01                  |
| GGAAACTCCGGCAAGGGTTCTGG                           |       |       |       |                                                 |                                      |
| 55917                                             | 55932 | 55016 | 58645 | CDS product single-stranded DNA-binding protein | 55917-55932 4:01:01 GGGGGACGGTAGCGGG |
| 56134                                             | 56152 | 55016 | 58645 | CDS product single-stranded DNA-binding protein | 56134-56152 4:01:01                  |
| GGACTGGTTGGAGCCATGG                               |       |       |       |                                                 |                                      |
| 56230                                             | 56265 | 55016 | 58645 | CDS product single-stranded DNA-binding protein | 56230-56265 7:04:01                  |
| CCTTCCTACCACCGCTTCTACCTAATAGCCGCTCCC              |       |       |       |                                                 |                                      |
| 56753                                             | 56773 | 55016 | 58645 | CDS product single-stranded DNA-binding protein | 56753-56773 4:01:01                  |
| GGGCCACGATGGAGCGGCTGG                             |       |       |       |                                                 |                                      |
| 56825                                             | 56847 | 55016 | 58645 | CDS product single-stranded DNA-binding protein | 56825-56847 5:02:01                  |



|                                            |       |       |       |                                                 |             |                          |
|--------------------------------------------|-------|-------|-------|-------------------------------------------------|-------------|--------------------------|
| CCAGCCCCTGCTCAGCCCCACC                     |       |       |       |                                                 |             |                          |
| 57271                                      | 57291 | 55016 | 58645 | CDS product single-stranded DNA-binding protein | 57271-57291 | 5:02:01                  |
| CCCGCCTCAGAGCCACCCACC                      |       |       |       |                                                 |             |                          |
| 57393                                      | 57424 | 55016 | 58645 | CDS product single-stranded DNA-binding protein | 57393-57424 | 7:04:01                  |
| GGAAGCGGCCAGGGCCAGGGTGGCCGGCATGG           |       |       |       |                                                 |             |                          |
| 57401                                      | 57426 | 55016 | 58645 | CDS product single-stranded DNA-binding protein | 57401-57426 | 4:01:01                  |
| CCAGGGCCAGGGTGGCCGGCATGGCC                 |       |       |       |                                                 |             |                          |
| 57566                                      | 57590 | 55016 | 58645 | CDS product single-stranded DNA-binding protein | 57566-57590 | 4:01:01                  |
| CCCTGCTCCAGCGCAACCAGATGCC                  |       |       |       |                                                 |             |                          |
| 58038                                      | 58067 | 55016 | 58645 | CDS product single-stranded DNA-binding protein | 58038-58067 | 6:03:01                  |
| GGCAGGCAACTGGAACGGCCTCAACGGCGG             |       |       |       |                                                 |             |                          |
| 58149                                      | 58171 | 55016 | 58645 | CDS product single-stranded DNA-binding protein | 58149-58171 | 6:03:01                  |
| GGCCGGAGGATTTGGCACGGGGG                    |       |       |       |                                                 |             |                          |
| 58304                                      | 58318 | 55016 | 58645 | CDS product single-stranded DNA-binding protein | 58304-58318 | 4:01:01 GGATCGGTCTGGTGG  |
| 58378                                      | 58411 | 55016 | 58645 | CDS product single-stranded DNA-binding protein | 58378-58411 | 6:03:01                  |
| GGAGAGTGGAGCGTGGAGGCTGCCAGGAGCTGG          |       |       |       |                                                 |             |                          |
| 58525                                      | 58540 | 55016 | 58645 | CDS product single-stranded DNA-binding protein | 58525-58540 | 4:01:01 GGTGGCCTGGCCATGG |
| 59348                                      | 59376 | 58804 | 61131 | CDS product DNA packaging terminase subunit 2   | 59348-59376 | 5:02:01                  |
| GGTGGGCAGCGGTATCGTGGTACCCCGG               |       |       |       |                                                 |             |                          |
| 59387                                      | 59405 | 58804 | 61131 | CDS product DNA packaging terminase subunit 2   | 59387-59405 | 4:01:01                  |
| CCCCACCATCCCTGCTCC                         |       |       |       |                                                 |             |                          |
| 59569                                      | 59612 | 58804 | 61131 | CDS product DNA packaging terminase subunit 2   | 59569-59612 | 7:04:01                  |
| GGCGCGGCGCGGGAAGCGGCTCTCCGGGCCCTCGAGGCCAGG |       |       |       |                                                 |             |                          |

|                                     |       |       |       |                                               |             |                                     |
|-------------------------------------|-------|-------|-------|-----------------------------------------------|-------------|-------------------------------------|
| 60126                               | 60144 | 58804 | 61131 | CDS product DNA packaging terminase subunit 2 | 60126-60144 | 4:01:01                             |
| GGCGCCGGCGAGTTGGGGG                 |       |       |       |                                               |             |                                     |
| 60560                               | 60590 | 58804 | 61131 | CDS product DNA packaging terminase subunit 2 | 60560-60590 | 6:03:01                             |
| CCACCCCATCGACCAGTCCCTCATGCCGTCC     |       |       |       |                                               |             |                                     |
| 61029                               | 61053 | 58804 | 61131 | CDS product DNA packaging terminase subunit 2 | 61029-61053 | 5:02:01                             |
| GGGGCCATTGGCGCGGAGACGGTGG           |       |       |       |                                               |             |                                     |
| 61407                               | 61432 | 61290 | 63935 | CDS product envelope glycoprotein B           | 61407-61432 | 7:04:01 CCTGCCACCGCCTACCGGATCCACC   |
| 61629                               | 61649 | 61290 | 63935 | CDS product envelope glycoprotein B           | 61629-61649 | 4:01:01 GGGTTCCGGTTTCACTGGAGG       |
| 61787                               | 61813 | 61290 | 63935 | CDS product envelope glycoprotein B           | 61787-61813 | 5:02:01 CCGGGGGCCAGAGCCTGGCAGACCACC |
| 61834                               | 61852 | 61290 | 63935 | CDS product envelope glycoprotein B           | 61834-61852 | 4:01:01 GGGGTGGATGCCATGGAGG         |
| 61888                               | 61903 | 61290 | 63935 | CDS product envelope glycoprotein B           | 61888-61903 | 5:02:01 GGAGGTGGAGGCGCGG            |
| 61905                               | 61939 | 61290 | 63935 | CDS product envelope glycoprotein B           | 61905-61939 | 6:03:01                             |
| CCGTCTACCCCTACGACTCCTTCGCCCTGTCCACC |       |       |       |                                               |             |                                     |
| 62478                               | 62495 | 61290 | 63935 | CDS product envelope glycoprotein B           | 62478-62495 | 4:01:01 CCAACCGCACCTACGACC          |
| 62560                               | 62588 | 61290 | 63935 | CDS product envelope glycoprotein B           | 62560-62588 | 6:03:01                             |
| CCTGTCCGTACCAGAACCTCAGCCAACCC       |       |       |       |                                               |             |                                     |
| 62641                               | 62655 | 61290 | 63935 | CDS product envelope glycoprotein B           | 62641-62655 | 4:01:01 GGAGGCAACGGCAGG             |
| 62658                               | 62680 | 61290 | 63935 | CDS product envelope glycoprotein B           | 62658-62680 | 4:01:01 CCGATTCTTCCAACGTCACCGCC     |
| 63436                               | 63465 | 61290 | 63935 | CDS product envelope glycoprotein B           | 63436-63465 | 6:03:01                             |
| GGGCCTGGGTAAAGTGGGGGAGGCCGTGGG      |       |       |       |                                               |             |                                     |
| 63678                               | 63700 | 61290 | 63935 | CDS product envelope glycoprotein B           | 63678-63700 | 5:02:01 CCAAGACTTCCTCCGGCCAGACC     |
| 63775                               | 63797 | 61290 | 63935 | CDS product envelope glycoprotein B           | 63775-63797 | 4:01:01 GGTTTCGGCCCTGGAAGCAGG       |
| 64177                               | 64200 | 64137 | 64616 | CDS product protein V32                       | 64177-64200 | 4:01:01 CCGCACCGAGGCCGAGTTTCCCC     |

|                                                  |       |       |       |                                                 |                                                  |
|--------------------------------------------------|-------|-------|-------|-------------------------------------------------|--------------------------------------------------|
| 64547                                            | 64565 | 64137 | 64616 | CDS product protein V32                         | 64547-64565 4:01:01 CCCGACACTCCCACCGCCC          |
| 64759                                            | 64776 | 64701 | 65690 | CDS product capsid scaffold protein             | 64759-64776 4:01:01 GGCCGGTGGACGCACTGG           |
| 64960                                            | 65007 | 64701 | 65690 | CDS product capsid scaffold protein             | 64960-65007 8:05:02                              |
| GGGTTGGCTGAGAGGGGATTCCTGGTATCTGCGGAGCAAGGATGGCGG |       |       |       |                                                 |                                                  |
| 65052                                            | 65071 | 64701 | 65690 | CDS product capsid scaffold protein             | 65052-65071 4:01:01 GGAGAAACGGCGGTATGGG          |
| 65088                                            | 65115 | 64701 | 65690 | CDS product capsid scaffold protein             | 65088-65115 5:02:01 GGAGCGGCTTGGGGCTGCGCGGTCACGG |
| 65183                                            | 65202 | 64701 | 65690 | CDS product capsid scaffold protein             | 65183-65202 5:02:01 GGTGGTGGACGGGCGCCCCG         |
| 65484                                            | 65512 | 64701 | 65690 | CDS product capsid scaffold protein             | 65484-65512 6:03:01                              |
| GGCGGCATCAGGGAATTGTAGCCGCGG                      |       |       |       |                                                 |                                                  |
| 65841                                            | 65866 | 64701 | 66641 | CDS product capsid maturation protease          | 65841-65866 5:02:01                              |
| CCGCATGTGCCTACCAGCTCCGCCCC                       |       |       |       |                                                 |                                                  |
| 65933                                            | 65955 | 64701 | 66641 | CDS product capsid maturation protease          | 65933-65955 4:01:01 CCCTTCTATGCCAGCCTCGCGCC      |
| 66050                                            | 66068 | 64701 | 66641 | CDS product capsid maturation protease          | 66050-66068 4:01:01 CCACGTGGCCGCATCCCC           |
| 66311                                            | 66331 | 64701 | 66641 | CDS product capsid maturation protease          | 66311-66331 4:01:01 CCGCTCCTGCTCCGAAAGCCC        |
| 66451                                            | 66469 | 64701 | 66641 | CDS product capsid maturation protease          | 66451-66469 4:01:01 CCTCCCCGACCACACCCC           |
| 66507                                            | 66537 | 64701 | 66641 | CDS product capsid maturation protease          | 66507-66537 5:02:01                              |
| GGGGGAAGCGCGGCTGCGACGGTTCCCTGG                   |       |       |       |                                                 |                                                  |
| 66961                                            | 66978 | 66763 | 68526 | CDS product DNA packaging tegument protein UL25 | 66961-66978 4:01:01                              |
| GGTACCGGGGCGGTCCGG                               |       |       |       |                                                 |                                                  |
| 67146                                            | 67162 | 66763 | 68526 | CDS product DNA packaging tegument protein UL25 | 67146-67162 4:01:01                              |
| GGCGAGGTATATGGGGG                                |       |       |       |                                                 |                                                  |
| 67214                                            | 67246 | 66763 | 68526 | CDS product DNA packaging tegument protein UL25 | 67214-67246 6:03:01                              |
| CCATAGCTGCCGCATCTCCCCGCTCGCCCCC                  |       |       |       |                                                 |                                                  |

|                                    |       |       |       |                                                 |                     |                              |
|------------------------------------|-------|-------|-------|-------------------------------------------------|---------------------|------------------------------|
| 67611                              | 67622 | 66763 | 68526 | CDS product DNA packaging tegument protein UL25 | 67611-67622 4:01:01 | CCCCCTCCTCC                  |
| 67671                              | 67704 | 66763 | 68526 | CDS product DNA packaging tegument protein UL25 | 67671-67704 6:03:01 |                              |
| CCCAACCTTTCCGAGAGTTCCGTCTCCGAGTGCC |       |       |       |                                                 |                     |                              |
| 67785                              | 67806 | 66763 | 68526 | CDS product DNA packaging tegument protein UL25 | 67785-67806 4:01:01 |                              |
| GGCGCGATGGGCTAAATGGAGG             |       |       |       |                                                 |                     |                              |
| 67986                              | 68018 | 66763 | 68526 | CDS product DNA packaging tegument protein UL25 | 67986-68018 6:03:01 |                              |
| CCAGGTCCCGAATACCACCCCGTTGACCCGCC   |       |       |       |                                                 |                     |                              |
| 68168                              | 68185 | 66763 | 68526 | CDS product DNA packaging tegument protein UL25 | 68168-68185 4:01:01 |                              |
| GGGGTGTGGCGGCGTCGG                 |       |       |       |                                                 |                     |                              |
| 68216                              | 68242 | 66763 | 68526 | CDS product DNA packaging tegument protein UL25 | 68216-68242 4:01:01 |                              |
| GGGCCGCCAGGGCGTCGGCTACCTTGG        |       |       |       |                                                 |                     |                              |
| 68767                              | 68798 | 68629 | 69369 | CDS product nuclear protein UL24                | 68767-68798 5:02:01 |                              |
| GGCTGCTGGGCTGGCGTTATAGGTTGCACGGG   |       |       |       |                                                 |                     |                              |
| 69775                              | 69795 | 69460 | 70518 | CDS product thymidine kinase                    | 69775-69795 5:02:01 | CCACGCCCTACCTTATCCTCC        |
| 69844                              | 69860 | 69460 | 70518 | CDS product thymidine kinase                    | 69844-69860 4:01:01 | CCAGGCCAGACCTAACC            |
| 69872                              | 69893 | 69460 | 70518 | CDS product thymidine kinase                    | 69872-69893 5:02:01 | CCGCCACCCTGTGCGCTCTGCC       |
| 69952                              | 69979 | 69460 | 70518 | CDS product thymidine kinase                    | 69952-69979 5:02:01 | CCATGGTCGCCACCCTACCCAGGGAACC |
| 70140                              | 70167 | 69460 | 70518 | CDS product thymidine kinase                    | 70140-70167 5:02:01 | GGGAGAGTCTGGCGTGACGGCTGGGGGG |
| 71030                              | 71047 | 70743 | 73301 | CDS product envelope glycoprotein H             | 71030-71047 4:01:01 | CCTCCGCAACACCACCCC           |
| 71063                              | 71088 | 70743 | 73301 | CDS product envelope glycoprotein H             | 71063-71088 4:01:01 | CCGGAGCCTGGTGACCCACGCGGACC   |
| 71700                              | 71717 | 70743 | 73301 | CDS product envelope glycoprotein H             | 71700-71717 4:01:01 | GGATTTCCCGGGAGGTGG           |
| 71941                              | 71960 | 70743 | 73301 | CDS product envelope glycoprotein H             | 71941-71960 5:02:01 | CCTCCGCTCATTGTCCCCC          |
| 72169                              | 72187 | 70743 | 73301 | CDS product envelope glycoprotein H             | 72169-72187 4:01:01 | GGTGACCTTGGCGGACCGG          |

|       |       |       |       |                                              |                     |                              |
|-------|-------|-------|-------|----------------------------------------------|---------------------|------------------------------|
| 73056 | 73075 | 70743 | 73301 | CDS product envelope glycoprotein H          | 73056-73075 4:01:01 | CCATCCCGGCTTTAATCCC          |
| 73140 | 73162 | 70743 | 73301 | CDS product envelope glycoprotein H          | 73140-73162 4:01:01 | CCGCCTTCGCGTCCTATTCATCC      |
| 74304 | 74323 | 74168 | 75760 | CDS product tegument protein UL21            | 74304-74323 4:01:01 | CCACCGGTAGGCCGCTTCCC         |
| 74340 | 74361 | 74168 | 75760 | CDS product tegument protein UL21            | 74340-74361 5:02:01 | CCTGCGCCGCTCCCCGATTCC        |
| 74525 | 74540 | 74168 | 75760 | CDS product tegument protein UL21            | 74525-74540 4:01:01 | GGATCGGTGGGTGGG              |
| 74611 | 74637 | 74168 | 75760 | CDS product tegument protein UL21            | 74611-74637 5:02:01 | GGCCACCAGGTGTGGGTCTGGGAGTGG  |
| 74803 | 74824 | 74168 | 75760 | CDS product tegument protein UL21            | 74803-74824 4:01:01 | CCCCTCGTTGCCGTATACCGCC       |
| 74871 | 74890 | 74168 | 75760 | CDS product tegument protein UL21            | 74871-74890 4:01:01 | CCAACCCGGGCCACGGTTCC         |
| 74951 | 74978 | 74168 | 75760 | CDS product tegument protein UL21            | 74951-74978 4:01:01 | CCGCTGGCCACGCGACCCGAAGAATCCC |
| 74989 | 75013 | 74168 | 75760 | CDS product tegument protein UL21            | 74989-75013 4:01:01 | GGGCTTTGGAATCAGGCGCACTTGG    |
| 75042 | 75062 | 74168 | 75760 | CDS product tegument protein UL21            | 75042-75062 4:01:01 | GGGGCGTTTGGAGCACCGGG         |
| 75209 | 75226 | 74168 | 75760 | CDS product tegument protein UL21            | 75209-75226 4:01:01 | GGGGGTAACCTCGGTTAGG          |
| 75631 | 75651 | 74168 | 75760 | CDS product tegument protein UL21            | 75631-75651 4:01:01 | GGACGTGGCATGTGGTCGAGG        |
| 77560 | 77590 | 77244 | 81374 | CDS product major capsid protein             | 77560-77590 6:03:01 |                              |
|       |       |       |       | CCCACATCCTGTGGACCAGCCTACCCACACC              |                     |                              |
| 77644 | 77670 | 77244 | 81374 | CDS product major capsid protein             | 77644-77670 5:02:01 | GGCCGAGGCCCTGGGCCTGATTGGGGG  |
| 78006 | 78019 | 77244 | 81374 | CDS product major capsid protein             | 78006-78019 4:01:01 | CCCCCTCCGTCGCC               |
| 78394 | 78417 | 77244 | 81374 | CDS product major capsid protein             | 78394-78417 4:01:01 | CCAGGCGACCAACGTTCCGTACCC     |
| 78470 | 78482 | 77244 | 81374 | CDS product major capsid protein             | 78470-78482 4:01:01 | CCGGCCACCGACC                |
| 78512 | 78556 | 77244 | 81374 | CDS product major capsid protein             | 78512-78556 9:06:02 |                              |
|       |       |       |       | CCAACCCCGGGCAGCCAGACCCTCGCACCTACCCACCCCAAACC |                     |                              |
| 78705 | 78733 | 77244 | 81374 | CDS product major capsid protein             | 78705-78733 6:03:01 |                              |
|       |       |       |       | CCTACGTGACCCTACCCCCAGCCGGCACC                |                     |                              |

|                                                         |       |       |       |                                      |
|---------------------------------------------------------|-------|-------|-------|--------------------------------------|
| 78985                                                   | 79002 | 77244 | 81374 | CDS product major capsid protein     |
| 79373                                                   | 79395 | 77244 | 81374 | CDS product major capsid protein     |
| 79427                                                   | 79443 | 77244 | 81374 | CDS product major capsid protein     |
| 79476                                                   | 79526 | 77244 | 81374 | CDS product major capsid protein     |
| GGGCCGACATGGGTAGGGCCAGGGCACAGGATCTATGGGTGGACGGGGTGG     |       |       |       |                                      |
| 79630                                                   | 79653 | 77244 | 81374 | CDS product major capsid protein     |
| 79803                                                   | 79857 | 77244 | 81374 | CDS product major capsid protein     |
| CCCCAACCAGCCCAAGCGACCCTCGCCATCCGCTGAACCCGCGCCACCTAGTGCC |       |       |       |                                      |
| 79887                                                   | 79925 | 77244 | 81374 | CDS product major capsid protein     |
| CCAGAGTTGCCGTCGACACCGACGCCCTGCTACTCCTCC                 |       |       |       |                                      |
| 80494                                                   | 80507 | 77244 | 81374 | CDS product major capsid protein     |
| 80532                                                   | 80556 | 77244 | 81374 | CDS product major capsid protein     |
| 80710                                                   | 80733 | 77244 | 81374 | CDS product major capsid protein     |
| 80775                                                   | 80791 | 77244 | 81374 | CDS product major capsid protein     |
| 80942                                                   | 80973 | 77244 | 81374 | CDS product major capsid protein     |
| CCGGCCTACCCAAGCCGCGCCACCGTTAACCC                        |       |       |       |                                      |
| 81188                                                   | 81209 | 77244 | 81374 | CDS product major capsid protein     |
| 81656                                                   | 81680 | 81621 | 82565 | CDS product capsid triplex subunit 2 |
| CCCAGTGACCTATCTCCCGCTGACC                               |       |       |       |                                      |
| 82074                                                   | 82097 | 81621 | 82565 | CDS product capsid triplex subunit 2 |
| 82202                                                   | 82220 | 81621 | 82565 | CDS product capsid triplex subunit 2 |
| 82277                                                   | 82301 | 81621 | 82565 | CDS product capsid triplex subunit 2 |
| CCCAACCTGCTTACCCTGGGAACCC                               |       |       |       |                                      |

|             |          |                           |
|-------------|----------|---------------------------|
| 78985-79002 | 5:02:01  | CCCCCTCCCCCTATGTCC        |
| 79373-79395 | 4:01:01  | GGGAAGCCGTGGGAGGCCAGGG    |
| 79427-79443 | 4:01:01  | CCGGCCCTGCTACCGCC         |
| 79476-79526 | 9:06:02  |                           |
| 79630-79653 | 4:01:01  | CCCGATTGTGCCTCACCACGACCC  |
| 79803-79857 | 10:07:02 |                           |
| 79887-79925 | 6:03:01  |                           |
| 80494-80507 | 4:01:01  | GGCGTTGGGGGGG             |
| 80532-80556 | 5:02:01  | GGGCTAACGTGGACTTGGGGGTTGG |
| 80710-80733 | 4:01:01  | CCTGGGGCCCCAGGGACCCAGGCC  |
| 80775-80791 | 4:01:01  | CCCACGGCCAGGCCGCC         |
| 80942-80973 | 7:04:01  |                           |
| 81188-81209 | 4:01:01  | GGCTCGACGGACCTGGTTGAGG    |
| 81656-81680 | 4:01:01  |                           |
| 82074-82097 | 5:02:01  | GGCTGGTGGCGCGCGGTTTCAGG   |
| 82202-82220 | 4:01:01  | GGCGTGGCGGGTCTCTGG        |
| 82277-82301 | 4:01:01  |                           |

|                                   |       |       |       |                                                 |                                     |
|-----------------------------------|-------|-------|-------|-------------------------------------------------|-------------------------------------|
| 82357                             | 82389 | 81621 | 82565 | CDS product capsid triplex subunit 2            | 82357-82389 6:03:01                 |
| CCAGCTCGTCCACCAGCAGCCCGTACCCCAACC |       |       |       |                                                 |                                     |
| 82719                             | 82740 | 82687 | 88447 | CDS product DNA packaging terminase subunit 1   | 82719-82740 6:03:01                 |
| GGTTGGTGGGAGGCTGGACAGG            |       |       |       |                                                 |                                     |
| 83315                             | 83334 | 82687 | 88447 | CDS product DNA packaging terminase subunit 1   | 83315-83334 4:01:01                 |
| CCACACCGGTTCTGAAGCC               |       |       |       |                                                 |                                     |
| 83953                             | 83984 | 82687 | 88447 | CDS product DNA packaging terminase subunit 1   | 83953-83984 6:03:01                 |
| CCTGCTACCCGGTTCATACCCCGGCGTACC    |       |       |       |                                                 |                                     |
| 84149                             | 84178 | 84016 | 86136 | CDS product DNA packaging tegument protein UL17 | 84149-84178 6:03:01                 |
| CCGCCATAGAGCCAGCCCATCCGCGGCTCC    |       |       |       |                                                 |                                     |
| 84291                             | 84313 | 84016 | 86136 | CDS product DNA packaging tegument protein UL17 | 84291-84313 4:01:01                 |
| CCGACAGTTCCTGCTGACCAACC           |       |       |       |                                                 |                                     |
| 84430                             | 84449 | 84016 | 86136 | CDS product DNA packaging tegument protein UL17 | 84430-84449 4:01:01                 |
| CCGACGACCCACGGACCACC              |       |       |       |                                                 |                                     |
| 85017                             | 85040 | 84016 | 86136 | CDS product DNA packaging tegument protein UL17 | 85017-85040 4:01:01                 |
| CCCCCTCAGGGACCCAGGAGCCCC          |       |       |       |                                                 |                                     |
| 85102                             | 85119 | 84016 | 86136 | CDS product DNA packaging tegument protein UL17 | 85102-85119 4:01:01                 |
| CCAACCCACTCACCCCCC                |       |       |       |                                                 |                                     |
| 85270                             | 85284 | 84016 | 86136 | CDS product DNA packaging tegument protein UL17 | 85270-85284 4:01:01 GGGGGGGTCGGAGGG |
| 85437                             | 85451 | 84016 | 86136 | CDS product DNA packaging tegument protein UL17 | 85437-85451 4:01:01 CCACCACCCGTGGCC |
| 85501                             | 85518 | 84016 | 86136 | CDS product DNA packaging tegument protein UL17 | 85501-85518 4:01:01                 |
| CCTGTGTTTCCGCCCTCC                |       |       |       |                                                 |                                     |
| 86198                             | 86228 | 86156 | 87265 | CDS product tegument protein UL16               | 86198-86228 6:03:01                 |

|                                        |       |       |       |                                               |                                              |
|----------------------------------------|-------|-------|-------|-----------------------------------------------|----------------------------------------------|
| CCGCGTCCTCTCCCAACGCGCACTAACCCC         |       |       |       |                                               |                                              |
| 86359                                  | 86397 | 86156 | 87265 | CDS product tegument protein UL16             | 86359-86397 7:04:01                          |
| CCGCCCCCGGCCAAGCTCACCACACAGCCAAGTGCGCC |       |       |       |                                               |                                              |
| 86518                                  | 86550 | 86156 | 87265 | CDS product tegument protein UL16             | 86518-86550 6:03:01                          |
| CCCTTTCCCGTGGGCCCCCAGAGATTCCGCGCC      |       |       |       |                                               |                                              |
| 86581                                  | 86600 | 86156 | 87265 | CDS product tegument protein UL16             | 86581-86600 4:01:01 CCGTCCGACGTACCGAACCC     |
| 86703                                  | 86721 | 86156 | 87265 | CDS product tegument protein UL16             | 86703-86721 4:01:01 GGCTCCTGGCGTCTGGTGG      |
| 87087                                  | 87110 | 86156 | 87265 | CDS product tegument protein UL16             | 87087-87110 4:01:01 GGTCGTGGGAATAGGGCCGCACGG |
| 87136                                  | 87151 | 86156 | 87265 | CDS product tegument protein UL16             | 87136-87151 4:01:01 GGATGGAACTGGTGG          |
| 87973                                  | 88003 | 82687 | 88447 | CDS product DNA packaging terminase subunit 1 | 87973-88003 5:02:01                          |
| GGCTACTTGGTGAAAGGCGTCTGAGGAGCGG        |       |       |       |                                               |                                              |
| 88098                                  | 88129 | 82687 | 88447 | CDS product DNA packaging terminase subunit 1 | 88098-88129 5:02:01                          |
| CCTGTGGAACCTTGGGGTCCACGTAGGCCTCC       |       |       |       |                                               |                                              |
| 88123                                  | 88141 | 82687 | 88447 | CDS product DNA packaging terminase subunit 1 | 88123-88141 4:01:01                          |
| GGCCTCCACGGAGGACGGG                    |       |       |       |                                               |                                              |
| 88262                                  | 88293 | 82687 | 88447 | CDS product DNA packaging terminase subunit 1 | 88262-88293 6:03:01                          |
| GGAACGACGGTCTGGTGGCGCTGGGGAGTAGG       |       |       |       |                                               |                                              |
| 88386                                  | 88402 | 82687 | 88447 | CDS product DNA packaging terminase subunit 1 | 88386-88402 4:01:01                          |
| CCTCCCTCCGCAGCGCC                      |       |       |       |                                               |                                              |
| 88422                                  | 88440 | 82687 | 88447 | CDS product DNA packaging terminase subunit 1 | 88422-88440 4:01:01                          |
| CCCTGCCCAGCACCTACC                     |       |       |       |                                               |                                              |
| 88487                                  | 88508 | 88477 | 89433 | CDS product tegument protein UL14             | 88487-88508 4:01:01 GGCACGGTCTAGGCGCCAAAGG   |
| 88866                                  | 88885 | 88477 | 89433 | CDS product tegument protein UL14             | 88866-88885 6:03:01 GGAGGCGGCGGTGAGGTCCG     |



|                                          |       |       |       |                                                      |             |         |                                 |
|------------------------------------------|-------|-------|-------|------------------------------------------------------|-------------|---------|---------------------------------|
| 88982                                    | 89014 | 88477 | 89433 | CDS product tegument protein UL14                    | 88982-89014 | 5:02:01 |                                 |
| CCCTCATTCTCCCCGCTCGACCTGTCCCGCCCC        |       |       |       |                                                      |             |         |                                 |
| 89303                                    | 89335 | 88477 | 89433 | CDS product tegument protein UL14                    | 89303-89335 | 7:04:01 |                                 |
| GGTCGGCCCCGGCCGATCAGGAATGGCTGGGTGG       |       |       |       |                                                      |             |         |                                 |
| 89585                                    | 89609 | 88899 | 90686 | CDS product tegument serine/threonine protein kinase | 89585-89609 | 5:02:01 |                                 |
| GGAGGCGCCGGTAGCTACGGAGAGG                |       |       |       |                                                      |             |         |                                 |
| 89845                                    | 89858 | 88899 | 90686 | CDS product tegument serine/threonine protein kinase | 89845-89858 | 4:01:01 |                                 |
| CCCCCCTCCGTCC                            |       |       |       |                                                      |             |         |                                 |
| 90416                                    | 90438 | 88899 | 90686 | CDS product tegument serine/threonine protein kinase | 90416-90438 | 5:02:01 |                                 |
| CCCGCCCTCTTTCCACCAACCCC                  |       |       |       |                                                      |             |         |                                 |
| 90584                                    | 90598 | 88899 | 90686 | CDS product tegument serine/threonine protein kinase | 90584-90598 | 4:01:01 |                                 |
| CCGTCCGCCTTTACC                          |       |       |       |                                                      |             |         |                                 |
| 90936                                    | 90954 | 90668 | 92365 | CDS product deoxyribonuclease                        | 90936-90954 | 5:02:01 | CCGTCCGCTCCCCCATAAC             |
| 91005                                    | 91043 | 90668 | 92365 | CDS product deoxyribonuclease                        | 91005-91043 | 6:03:01 |                                 |
| GGTAGGAGAAATGGAGCTAGAGGGGATCGTGGAACGCGG  |       |       |       |                                                      |             |         |                                 |
| 91077                                    | 91094 | 90668 | 92365 | CDS product deoxyribonuclease                        | 91077-91094 | 4:01:01 | GGCTGGCTTTGCGGCAGG              |
| 91121                                    | 91140 | 90668 | 92365 | CDS product deoxyribonuclease                        | 91121-91140 | 4:01:01 | CCAAAACCATGTCCCTGGCC            |
| 91401                                    | 91439 | 90668 | 92365 | CDS product deoxyribonuclease                        | 91401-91439 | 7:04:01 |                                 |
| GGCGGCGACCCCGGACCTACTGGTGGATCCGGGATACGG  |       |       |       |                                                      |             |         |                                 |
| 91519                                    | 91549 | 90668 | 92365 | CDS product deoxyribonuclease                        | 91519-91549 | 4:01:01 | GGCGTCGTTGGGGCGTCCTTGATATGCTGG  |
| 91953                                    | 91993 | 90668 | 92365 | CDS product deoxyribonuclease                        | 91953-91993 | 6:03:01 |                                 |
| GGCCCGCTGGGACACAGGAGATTGGCTCTGTCGGTTCCGG |       |       |       |                                                      |             |         |                                 |
| 92054                                    | 92084 | 90668 | 92365 | CDS product deoxyribonuclease                        | 92054-92084 | 7:04:01 | CCGGCCATTTTCCCGACCACCAACTCCGTCC |

|                                     |       |       |       |                                                     |                                                   |
|-------------------------------------|-------|-------|-------|-----------------------------------------------------|---------------------------------------------------|
| 92235                               | 92263 | 90668 | 92365 | CDS product deoxyribonuclease                       | 92235-92263 4:01:01 GGTGATTGTGGACCGCGAGGGTTGCTGGG |
| 92436                               | 92459 | 92317 | 92538 | CDS product myristylated tegument protein           | 92436-92459 6:03:01                               |
| CCCCCACCACCACTTAAACCC               |       |       |       |                                                     |                                                   |
| 93181                               | 93205 | 92650 | 94002 | CDS product envelope glycoprotein M                 | 93181-93205 4:01:01 CCCACGGCAACCGTTACCGTTTGCC     |
| 93305                               | 93324 | 92650 | 94002 | CDS product envelope glycoprotein M                 | 93305-93324 4:01:01 CCGCGCGTCCGGGTCCGGCC          |
| 93340                               | 93357 | 92650 | 94002 | CDS product envelope glycoprotein M                 | 93340-93357 4:01:01 GGTAGGTTGGTCTTTAGG            |
| 93455                               | 93471 | 92650 | 94002 | CDS product envelope glycoprotein M                 | 93455-93471 4:01:01 CCGCCCCAGGACTGCC              |
| 94026                               | 94043 | 93920 | 96583 | CDS product DNA replication origin-binding helicase | 94026-94043 4:01:01                               |
| GGGCGGCAAAGCGGAAGG                  |       |       |       |                                                     |                                                   |
| 94108                               | 94129 | 93920 | 96583 | CDS product DNA replication origin-binding helicase | 94108-94129 5:02:01                               |
| GGGGGCGACCTGGAGGAGTGGG              |       |       |       |                                                     |                                                   |
| 94189                               | 94209 | 93920 | 96583 | CDS product DNA replication origin-binding helicase | 94189-94209 5:02:01                               |
| CCCCGCCCCAACAACCCGTCC               |       |       |       |                                                     |                                                   |
| 94650                               | 94676 | 93920 | 96583 | CDS product DNA replication origin-binding helicase | 94650-94676 5:02:01                               |
| GGTGGATTTTTGGCTTCGGCGCGTGG          |       |       |       |                                                     |                                                   |
| 95073                               | 95087 | 93920 | 96583 | CDS product DNA replication origin-binding helicase | 95073-95087 4:01:01                               |
| GGTGGTAACGGTGGG                     |       |       |       |                                                     |                                                   |
| 95787                               | 95818 | 93920 | 96583 | CDS product DNA replication origin-binding helicase | 95787-95818 6:03:01                               |
| CCTCGGCGCCTGCCTGCGCCTCCCCGCGGCCC    |       |       |       |                                                     |                                                   |
| 96542                               | 96562 | 93920 | 96583 | CDS product DNA replication origin-binding helicase | 96542-96562 4:01:01                               |
| GGCCACAGGTTTACGGGGCGG               |       |       |       |                                                     |                                                   |
| 96833                               | 96868 | 96595 | 98850 | CDS product helicase-primase subunit                | 96833-96868 5:02:01                               |
| GGCTGTGCCGGGTGCTGGCCCTTGGCTCCCCTGGG |       |       |       |                                                     |                                                   |

|                                             |        |       |        |                                      |
|---------------------------------------------|--------|-------|--------|--------------------------------------|
| 96994                                       | 97007  | 96595 | 98850  | CDS product helicase-primase subunit |
| 97017                                       | 97033  | 96595 | 98850  | CDS product helicase-primase subunit |
| 97638                                       | 97657  | 96595 | 98850  | CDS product helicase-primase subunit |
| 97679                                       | 97719  | 96595 | 98850  | CDS product helicase-primase subunit |
| GGCTCCATGGGAACCGGAAGATAGGTGGCCCGGTGAATCGG   |        |       |        |                                      |
| 97729                                       | 97751  | 96595 | 98850  | CDS product helicase-primase subunit |
| 97769                                       | 97791  | 96595 | 98850  | CDS product helicase-primase subunit |
| 97937                                       | 97950  | 96595 | 98850  | CDS product helicase-primase subunit |
| 97997                                       | 98030  | 96595 | 98850  | CDS product helicase-primase subunit |
| CCCCGTGGCCTATAGGTCCATCATAGCCCTCGCC          |        |       |        |                                      |
| 98103                                       | 98122  | 96595 | 98850  | CDS product helicase-primase subunit |
| 98370                                       | 98391  | 96595 | 98850  | CDS product helicase-primase subunit |
| 99083                                       | 99108  | 98946 | 99857  | CDS product tegument protein UL7     |
| 99589                                       | 99607  | 98946 | 99857  | CDS product tegument protein UL7     |
| 99668                                       | 99694  | 98946 | 99857  | CDS product tegument protein UL7     |
| 100286                                      | 100305 | 99655 | 101916 | CDS product capsid portal protein    |
| 100328                                      | 100370 | 99655 | 101916 | CDS product capsid portal protein    |
| CCTCGTGCCCTAGTCCTCCTGCGCCAGCCTTGGCGCCACTCCC |        |       |        |                                      |
| 100408                                      | 100422 | 99655 | 101916 | CDS product capsid portal protein    |
| 100487                                      | 100518 | 99655 | 101916 | CDS product capsid portal protein    |
| CCAAAAGCCCGCTATTCCCGGCCCTCAGGTCC            |        |       |        |                                      |
| 100549                                      | 100571 | 99655 | 101916 | CDS product capsid portal protein    |
| 100832                                      | 100872 | 99655 | 101916 | CDS product capsid portal protein    |

|               |         |                           |
|---------------|---------|---------------------------|
| 96994-97007   | 4:01:01 | CCCTCCGACCGGCC            |
| 97017-97033   | 5:02:01 | GGTGAAGCGGTGGCGG          |
| 97638-97657   | 4:01:01 | GGGCTGTGGCCGGCTCTAGG      |
| 97679-97719   | 7:04:01 |                           |
| 97729-97751   | 4:01:01 | GGGTAGATGGGGTGGCACACAGG   |
| 97769-97791   | 6:03:01 | GGATGGTTGGGGGGCAGGGAGGG   |
| 97937-97950   | 4:01:01 | CCACCACCCACCC             |
| 97997-98030   | 5:02:01 |                           |
| 98103-98122   | 4:01:01 | GGCTTTTGGGGGGCAGCTGG      |
| 98370-98391   | 4:01:01 | GGGGCCGGCAGGGCCCAAAGG     |
| 99083-99108   | 4:01:01 | GGGACATGGGGTAGTGGGCTTTTGG |
| 99589-99607   | 5:02:01 | CCTCCGAGCCCTCCTGGCC       |
| 99668-99694   | 5:02:01 | GGTCGTAAAGAGGGGGCAAGCCTGG |
| 100286-100305 | 4:01:01 | CCACGTAGCCATCCTCTCCC      |
| 100328-100370 | 8:05:02 |                           |
| 100408-100422 | 4:01:01 | CCGTCGGCCGCCGCC           |
| 100487-100518 | 5:02:01 |                           |
| 100549-100571 | 4:01:01 | CCCTCCAGCATTCCGTTAATGCC   |
| 100832-100872 | 7:04:01 |                           |

|                                                                           |               |                                  |
|---------------------------------------------------------------------------|---------------|----------------------------------|
| CCACGGCCTTGAGGCCCACCCGGGCCCTGGGCCTCGTCC                                   |               |                                  |
| 101123 101182 99655 101916 CDS product capsid portal protein              | 101123-101182 | 11:08:02                         |
| CCATGATTGCCACGCTGGCCGTGCACCTGGCCAGCTCCACCACGGCCTCCAGCCCCCTCC              |               |                                  |
| 101284 101305 99655 101916 CDS product capsid portal protein              | 101284-101305 | 5:02:01 GGGTGGACGGTTGCGCCGGGGG   |
| 101364 101387 99655 101916 CDS product capsid portal protein              | 101364-101387 | 4:01:01 GGCAAAGCTGGCGGTGCCGTCGGG |
| 101645 101659 99655 101916 CDS product capsid portal protein              | 101645-101659 | 4:01:01 CCGCCTCCGTTGACC          |
| 101783 101800 99655 101916 CDS product capsid portal protein              | 101783-101800 | 4:01:01 CCTCCTACCCGGACTCC        |
| 101977 101991 101900 104545 CDS product helicase-primase helicase subunit | 101977-101991 | 4:01:01                          |
| CCGCCTCGCCCCGCC                                                           |               |                                  |
| 102323 102343 101900 104545 CDS product helicase-primase helicase subunit | 102323-102343 | 4:01:01                          |
| CCTCGGCCTTCACAGCCCCGCC                                                    |               |                                  |
| 102425 102440 101900 104545 CDS product helicase-primase helicase subunit | 102425-102440 | 4:01:01                          |
| CCTCGAGCCCGCCTCC                                                          |               |                                  |
| 102750 102769 101900 104545 CDS product helicase-primase helicase subunit | 102750-102769 | 4:01:01                          |
| GGATGGGAAGGTTCCCGTGG                                                      |               |                                  |
| 103065 103080 101900 104545 CDS product helicase-primase helicase subunit | 103065-103080 | 4:01:01                          |
| CCCCGCCAACCTTCCC                                                          |               |                                  |
| 103603 103645 101900 104545 CDS product helicase-primase helicase subunit | 103603-103645 | 8:05:02                          |
| GGGTTGGACGAGGGGAGGGTTCGGGAGGCGTACAGGCGCATGG                               |               |                                  |
| 103750 103780 101900 104545 CDS product helicase-primase helicase subunit | 103750-103780 | 5:02:01                          |
| GGATCTACGGGCGGGCTACAGGCGACTGGG                                            |               |                                  |
| 104247 104287 101900 104545 CDS product helicase-primase helicase subunit | 104247-104287 | 7:04:01                          |
| GGAGTCGGTGGACGACGTGGAGCTGGACATGGCCACCGCGG                                 |               |                                  |

|                                                                        |        |        |        |                                    |               |          |                             |
|------------------------------------------------------------------------|--------|--------|--------|------------------------------------|---------------|----------|-----------------------------|
| 104797                                                                 | 104817 | 104595 | 105269 | CDS product nuclear protein UL4    | 104797-104817 | 4:01:01  | GGCATTGGTGCTGGACTGCGG       |
| 104866                                                                 | 104878 | 104595 | 105269 | CDS product nuclear protein UL4    | 104866-104878 | 4:01:01  | CCCCCTGACCACC               |
| 104881                                                                 | 104900 | 104595 | 105269 | CDS product nuclear protein UL4    | 104881-104900 | 5:02:01  | GGACGGGTCGGTGCTGGTGG        |
| 105068                                                                 | 105091 | 104595 | 105269 | CDS product nuclear protein UL4    | 105068-105091 | 5:02:01  | CCTACCGTATGTTCCACCGCTGCC    |
| 105105                                                                 | 105131 | 104595 | 105269 | CDS product nuclear protein UL4    | 105105-105131 | 5:02:01  | CCGAGTCCGAGCCCTTATACGCCGACC |
| 105239                                                                 | 105259 | 104595 | 105269 | CDS product nuclear protein UL4    | 105239-105259 | 4:01:01  | CCGTGTTTCCCTGCCTCTCC        |
| 105461                                                                 | 105477 | 105399 | 105947 | CDS product protein V57            | 105461-105477 | 4:01:01  | GGTGGATGTGGGCTGGG           |
| 105508                                                                 | 105535 | 105399 | 105947 | CDS product protein V57            | 105508-105535 | 5:02:01  | CCTCGCCGCGGCTGCCGCTCCGTCGCC |
| 105667                                                                 | 105736 | 105399 | 105947 | CDS product protein V57            | 105667-105736 | 11:08:02 |                             |
| CCATGGCCAGCGCCCCGAGCGTTCCAGAAGGCCTCTCCAAGCTAGCCAGCGGTCCGTCGCCACCCGCTCC |        |        |        |                                    |               |          |                             |
| 106299                                                                 | 106318 | 106009 | 106647 | CDS product nuclear protein UL3    | 106299-106318 | 4:01:01  | GGAGAACGAGGAGGTCTTGG        |
| 106475                                                                 | 106496 | 106009 | 106647 | CDS product nuclear protein UL3    | 106475-106496 | 4:01:01  | GGGATTCTACGGATAGGTCGGG      |
| 106507                                                                 | 106525 | 106009 | 106647 | CDS product nuclear protein UL3    | 106507-106525 | 4:01:01  | GGGGTTGGGGTGGAAGTGG         |
| 106608                                                                 | 106619 | 106009 | 106647 | CDS product nuclear protein UL3    | 106608-106619 | 4:01:01  | CCACCCCCACCC                |
| 106881                                                                 | 106905 | 106737 | 107678 | CDS product uracil-DNA glycosylase | 106881-106905 | 4:01:01  |                             |
| GGTGAGCAGGACTTCTGGGCGTGGG                                              |        |        |        |                                    |               |          |                             |
| 106960                                                                 | 106985 | 106737 | 107678 | CDS product uracil-DNA glycosylase | 106960-106985 | 5:02:01  |                             |
| CCGCCCTGACTAGCCTGTGCCACCCC                                             |        |        |        |                                    |               |          |                             |
| 107047                                                                 | 107077 | 106737 | 107678 | CDS product uracil-DNA glycosylase | 107047-107077 | 5:02:01  |                             |
| CCCCCTGTTCTGCCCCACTTTTCCAGAAACCC                                       |        |        |        |                                    |               |          |                             |
| 107448                                                                 | 107466 | 106737 | 107678 | CDS product uracil-DNA glycosylase | 107448-107466 | 4:01:01  | GGGTGGGTGGACACGCTGG         |
| 107565                                                                 | 107589 | 106737 | 107678 | CDS product uracil-DNA glycosylase | 107565-107589 | 5:02:01  |                             |
| GGCCGGCCTGGTTCGCTGGTTGGGG                                              |        |        |        |                                    |               |          |                             |

|                                                                                                                                  |                                          |
|----------------------------------------------------------------------------------------------------------------------------------|------------------------------------------|
| 110080 110111 110076 111677 CDS product ubiquitin E3 ligase ICP0<br>GGTTCCTCCGGTATCTTTGGCAGTTGTGGGGG                             | 110080-110111 5:02:01                    |
| 110315 110336 110076 111677 CDS product ubiquitin E3 ligase ICP0<br>CCCCCGAAGATCCCTGCACCC                                        | 110315-110336 4:01:01                    |
| 110394 110417 110076 111677 CDS product ubiquitin E3 ligase ICP0<br>CCCATACCCCAGCGACCGGAGCCC                                     | 110394-110417 4:01:01                    |
| 110529 110554 110076 111677 CDS product ubiquitin E3 ligase ICP0<br>GGTGCAACAGGTTGGTCCCTGGGGGG                                   | 110529-110554 5:02:01                    |
| 110612 110629 110076 111677 CDS product ubiquitin E3 ligase ICP0                                                                 | 110612-110629 4:01:01 GGCAGGTGGGGATGAGGG |
| 110630 110645 110076 111677 CDS product ubiquitin E3 ligase ICP0                                                                 | 110630-110645 4:01:01 CCCC GCCTCCTCTTCC  |
| 110667 110679 110076 111677 CDS product ubiquitin E3 ligase ICP0                                                                 | 110667-110679 4:01:01 GGCTGGTCGGTGG      |
| 110767 110795 110076 111677 CDS product ubiquitin E3 ligase ICP0<br>GGGTGCGGGGTTGGTTCTTCTGGGCTGG                                 | 110767-110795 6:03:01                    |
| 110870 110884 110076 111677 CDS product ubiquitin E3 ligase ICP0                                                                 | 110870-110884 4:01:01 GGTTGGTGGCCCCGGG   |
| 110914 110932 110076 111677 CDS product ubiquitin E3 ligase ICP0                                                                 | 110914-110932 4:01:01 GCGGGGTGCGGGTGCTGG |
| 111304 111327 110076 111677 CDS product ubiquitin E3 ligase ICP0<br>GGGGTTGCAGGCGGGGAGCCCCGG                                     | 111304-111327 4:01:01                    |
| 113516 113551 113498 117925 CDS product transcriptional regulator ICP4<br>CCCCAGTCTCCACCGTCCTCGTCGTCGACACCACC                    | 113516-113551 7:04:01                    |
| 113563 113615 113498 117925 CDS product transcriptional regulator ICP4<br>GGGAGCGCGGCGGAGGGCCTGGGCCGCGCCGGGGCTAGGGCCGGGTGGTCTCGG | 113563-113615 10:07:02                   |
| 113616 113640 113498 117925 CDS product transcriptional regulator ICP4<br>CCACCAGCTCCACGTCGCCGGCCCC                              | 113616-113640 5:02:01                    |

|        |        |        |        |                                                                                                    |               |         |
|--------|--------|--------|--------|----------------------------------------------------------------------------------------------------|---------------|---------|
| 113747 | 113778 | 113498 | 117925 | CDS product transcriptional regulator ICP4<br>GGGGCCCCGGCGGGGAGCCTCGGTGATGGG                       | 113747-113778 | 6:03:01 |
| 113787 | 113808 | 113498 | 117925 | CDS product transcriptional regulator ICP4<br>GGGGTCCGGCCTCGGCGTCGGG                               | 113787-113808 | 4:01:01 |
| 113862 | 113895 | 113498 | 117925 | CDS product transcriptional regulator ICP4<br>CCGAGGGCTCCACGGCCCCGGCTCCGCGCCGGCC                   | 113862-113895 | 6:03:01 |
| 113892 | 113914 | 113498 | 117925 | CDS product transcriptional regulator ICP4<br>GGCCGCAGGCGAGGTACACGGGG                              | 113892-113914 | 4:01:01 |
| 113923 | 113956 | 113498 | 117925 | CDS product transcriptional regulator ICP4<br>GGCCCCGAGGCCCCAGCGGTTGCCGCGCGGTGG                    | 113923-113956 | 6:03:01 |
| 114071 | 114089 | 113498 | 117925 | CDS product transcriptional regulator ICP4<br>GGAGGCAGGGGGACGCGGG                                  | 114071-114089 | 5:02:01 |
| 114243 | 114264 | 113498 | 117925 | CDS product transcriptional regulator ICP4<br>GGCTGAGGTGGCGCTCCCGGGG                               | 114243-114264 | 4:01:01 |
| 114338 | 114355 | 113498 | 117925 | CDS product transcriptional regulator ICP4<br>CCGTCCTGGGGCCAGTCC                                   | 114338-114355 | 4:01:01 |
| 114394 | 114418 | 113498 | 117925 | CDS product transcriptional regulator ICP4<br>GGCGGAGCCCAGGCGGAGGCAGAGG                            | 114394-114418 | 6:03:01 |
| 114433 | 114485 | 113498 | 117925 | CDS product transcriptional regulator ICP4<br>GGTGAAGGCCAGGTCCCCGGTGGAGAGGAGCAGGACCCCTGGGCGTTGAGGG | 114433-114485 | 9:06:02 |
| 114486 | 114521 | 113498 | 117925 | CDS product transcriptional regulator ICP4<br>CCGAGACGTCCGGGGCTCCGGTCCAGTTGCCGGCCC                 | 114486-114521 | 6:03:01 |
| 114517 | 114560 | 113498 | 117925 | CDS product transcriptional regulator ICP4                                                         | 114517-114560 | 7:04:01 |

|                                                                        |               |                          |
|------------------------------------------------------------------------|---------------|--------------------------|
| GGCCCAGGCGTGGGACCGCTTGGTGAGGACGCGGTTCCCCAGGG                           |               |                          |
| 114553 114586 113498 117925 CDS product transcriptional regulator ICP4 | 114553-114586 | 6:03:01                  |
| CCCCAGGGCCGCCAGCAGCGCCGAGAGTCCCCC                                      |               |                          |
| 114625 114640 113498 117925 CDS product transcriptional regulator ICP4 | 114625-114640 | 4:01:01 GGGGCGGGCGGCCGGG |
| 114684 114700 113498 117925 CDS product transcriptional regulator ICP4 | 114684-114700 | 4:01:01                  |
| CCACCACCTTCACGTCC                                                      |               |                          |
| 114779 114798 113498 117925 CDS product transcriptional regulator ICP4 | 114779-114798 | 4:01:01                  |
| CCGTCCCTGGCCGGGGTCC                                                    |               |                          |
| 114807 114842 113498 117925 CDS product transcriptional regulator ICP4 | 114807-114842 | 6:03:01                  |
| GGGCCGCGATGGTGGCTAGGGCTGGGGATCGAAGG                                    |               |                          |
| 114851 114880 113498 117925 CDS product transcriptional regulator ICP4 | 114851-114880 | 5:02:01                  |
| GGGCGCCAGGCCTCGGGGAACAGCGGGTGG                                         |               |                          |
| 114904 114926 113498 117925 CDS product transcriptional regulator ICP4 | 114904-114926 | 4:01:01                  |
| GGGGGACAGTAGGCTGCGCAGG                                                 |               |                          |
| 114990 115049 113498 117925 CDS product transcriptional regulator ICP4 | 114990-115049 | 11:08:02                 |
| GGTCGGGGCCCTCGGCGGGCATGGGTCCCAGGGCCCGGGAGCCTGGTGGCCCTGGGTGG            |               |                          |
| 115016 115055 113498 117925 CDS product transcriptional regulator ICP4 | 115016-115055 | 6:03:01                  |
| CCCAGGGCCCGGGAGCCTGGTGGCCCTGGGTGGCCACCC                                |               |                          |
| 115063 115075 113498 117925 CDS product transcriptional regulator ICP4 | 115063-115075 | 4:01:01 GGGGGCAGGAGGG    |
| 115110 115133 113498 117925 CDS product transcriptional regulator ICP4 | 115110-115133 | 5:02:01                  |
| GGGCGGACGAGGAGAAGCCGGGG                                                |               |                          |
| 115128 115150 113498 117925 CDS product transcriptional regulator ICP4 | 115128-115150 | 5:02:01                  |
| CCGGGGCTCCAGCCTGGGCCGCC                                                |               |                          |



|        |        |        |        |                                                                                               |               |         |
|--------|--------|--------|--------|-----------------------------------------------------------------------------------------------|---------------|---------|
| 115143 | 115166 | 113498 | 117925 | CDS product transcriptional regulator ICP4<br>GGGCCCGCGCTCTAGGGGCTCGG                         | 115143-115166 | 4:01:01 |
| 115171 | 115200 | 113498 | 117925 | CDS product transcriptional regulator ICP4<br>CCGCTTGCCGCTCTTGCCCCGGGGCGCCC                   | 115171-115200 | 4:01:01 |
| 115251 | 115274 | 113498 | 117925 | CDS product transcriptional regulator ICP4<br>GGCTGAGGTGGGCCGGGGAGGCGG                        | 115251-115274 | 6:03:01 |
| 115311 | 115358 | 113498 | 117925 | CDS product transcriptional regulator ICP4<br>GGGAGCGGGCGCTGGTCTGGGTGGCCGGGAGCAGGTGGCTGTCGCGG | 115311-115358 | 9:06:02 |
| 115377 | 115397 | 113498 | 117925 | CDS product transcriptional regulator ICP4<br>GGGAGTGCTGGGGGACTGGG                            | 115377-115397 | 4:01:01 |
| 115433 | 115459 | 113498 | 117925 | CDS product transcriptional regulator ICP4<br>GGGACGGTGGGCCACAGGGCGGAAGG                      | 115433-115459 | 6:03:01 |
| 115462 | 115482 | 113498 | 117925 | CDS product transcriptional regulator ICP4<br>CCCCTCCGCGCCGAGGAGCC                            | 115462-115482 | 4:01:01 |
| 115471 | 115498 | 113498 | 117925 | CDS product transcriptional regulator ICP4<br>GGCCGAGGAGCCGGAGAAGGGCTGCTGG                    | 115471-115498 | 5:02:01 |
| 115513 | 115535 | 113498 | 117925 | CDS product transcriptional regulator ICP4<br>GGGGGAAGACGAGGAGGGCTGGG                         | 115513-115535 | 5:02:01 |
| 115544 | 115565 | 113498 | 117925 | CDS product transcriptional regulator ICP4<br>GGTGGGGCTAGCAGGGACACGG                          | 115544-115565 | 4:01:01 |
| 115566 | 115588 | 113498 | 117925 | CDS product transcriptional regulator ICP4<br>CCTCCCCAACATCCCCCGACC                           | 115566-115588 | 6:03:01 |
| 115609 | 115655 | 113498 | 117925 | CDS product transcriptional regulator ICP4                                                    | 115609-115655 | 8:05:02 |

|                                                                                                                               |               |                         |
|-------------------------------------------------------------------------------------------------------------------------------|---------------|-------------------------|
| GGCCTGGGTGACGGTCCAGGCCGAGGCCGGGGCCGGGGCCCCCTCGG                                                                               |               |                         |
| 115624 115651 113498 117925 CDS product transcriptional regulator ICP4<br>CCAGGCCGAGGCCGGGGCCGGGGCCCC                         | 115624-115651 | 6:03:01                 |
| 115729 115750 113498 117925 CDS product transcriptional regulator ICP4<br>GGCGCCAGGCGGTGGGTAGGG                               | 115729-115750 | 5:02:01                 |
| 115752 115790 113498 117925 CDS product transcriptional regulator ICP4<br>CCGAGTCCCCGAGGAGCCTGGCCCGCTCGACCAGGTCCC             | 115752-115790 | 6:03:01                 |
| 115812 115831 113498 117925 CDS product transcriptional regulator ICP4<br>CCGCCGTCTCCAGCCCCGCC                                | 115812-115831 | 5:02:01                 |
| 115852 115873 113498 117925 CDS product transcriptional regulator ICP4<br>GGGAGGGCAGGCGGGAGAGGGG                              | 115852-115873 | 5:02:01                 |
| 115917 115931 113498 117925 CDS product transcriptional regulator ICP4                                                        | 115917-115931 | 4:01:01 GGAGGCGCAGGAGGG |
| 115990 116039 113498 117925 CDS product transcriptional regulator ICP4<br>GGCGGACGGCCTGGGTGCCCTGGTACCCGGAGCGGCAGCGCCGCGGCGG   | 115990-116039 | 10:07:02                |
| 116088 116118 113498 117925 CDS product transcriptional regulator ICP4<br>GGACGCGGACCGAGGCCGCCGGGGGCTCGGG                     | 116088-116118 | 6:03:01                 |
| 116129 116179 113498 117925 CDS product transcriptional regulator ICP4<br>CCGGCCGCTGCCGCGGCGGCCTGGGCCGGGTAGCCGGCCGAGACCCCGGCC | 116129-116179 | 9:06:02                 |
| 116143 116165 113498 117925 CDS product transcriptional regulator ICP4<br>GGCGGCCTGGGCCGGGTAGCCGG                             | 116143-116165 | 5:02:01                 |
| 116196 116209 113498 117925 CDS product transcriptional regulator ICP4                                                        | 116196-116209 | 4:01:01 CCGGCCTCCCCGCC  |
| 116247 116260 113498 117925 CDS product transcriptional regulator ICP4                                                        | 116247-116260 | 4:01:01 GGAGGCTCTGGAGG  |
| 116280 116312 113498 117925 CDS product transcriptional regulator ICP4                                                        | 116280-116312 | 6:03:01                 |

|                                                                        |               |                        |
|------------------------------------------------------------------------|---------------|------------------------|
| GGTCGTAGCGGCGGCTCATGGCCACCGAGGCGG                                      |               |                        |
| 116342 116361 113498 117925 CDS product transcriptional regulator ICP4 | 116342-116361 | 4:01:01                |
| CCGGCCGCCATGGCATCCCC                                                   |               |                        |
| 116367 116381 113498 117925 CDS product transcriptional regulator ICP4 | 116367-116381 | 4:01:01 GGGCAGGGGGTTGG |
| 116634 116667 113498 117925 CDS product transcriptional regulator ICP4 | 116634-116667 | 6:03:01                |
| CCCACAGCCCGTCCCGCGAGTCCCGGTCCCCC                                       |               |                        |
| 116697 116718 113498 117925 CDS product transcriptional regulator ICP4 | 116697-116718 | 4:01:01                |
| CCGACCCGGGCCAGGGGTCCCC                                                 |               |                        |
| 116704 116726 113498 117925 CDS product transcriptional regulator ICP4 | 116704-116726 | 4:01:01                |
| GGGCCAGGGGTCCCCGACGGGG                                                 |               |                        |
| 116769 116782 113498 117925 CDS product transcriptional regulator ICP4 | 116769-116782 | 4:01:01 CCACCGGGGCCGCC |
| 116791 116804 113498 117925 CDS product transcriptional regulator ICP4 | 116791-116804 | 4:01:01 GGAGGCGGCCTGGG |
| 116817 116851 113498 117925 CDS product transcriptional regulator ICP4 | 116817-116851 | 6:03:01                |
| CCAGCAAGTCCCAAGAGGCCGTCCGCGGGGCCTCC                                    |               |                        |
| 116858 116891 113498 117925 CDS product transcriptional regulator ICP4 | 116858-116891 | 6:03:01                |
| GGTGCCTGGGTCTGGGGTATGGGTCTGGGGTTGG                                     |               |                        |
| 116957 116973 113498 117925 CDS product transcriptional regulator ICP4 | 116957-116973 | 4:01:01                |
| GGGCTCCGGCCCCGGCGG                                                     |               |                        |
| 117068 117079 113498 117925 CDS product transcriptional regulator ICP4 | 117068-117079 | 4:01:01 GGAGGGAGGAGG   |
| 117089 117145 113498 117925 CDS product transcriptional regulator ICP4 | 117089-117145 | 10:07:02               |
| GGGCGGCTGGGCGGGCGGGCGGGCGCACCCGAGAAGCGGCCCGGAGCGG                      |               |                        |
| 117155 117178 113498 117925 CDS product transcriptional regulator ICP4 | 117155-117178 | 5:02:01                |
| GGGGTGGCGGCCCCGCGCCCGGG                                                |               |                        |

|                                                                                                                                              |                                     |
|----------------------------------------------------------------------------------------------------------------------------------------------|-------------------------------------|
| 117190 117240 113498 117925 CDS product transcriptional regulator ICP4<br>GGAGGACGGCCCGGAGAGCCGGCGCCGACGGGTCTTCGCGGCGTCCGG                   | 117190-117240 9:06:02               |
| 117264 117276 113498 117925 CDS product transcriptional regulator ICP4                                                                       | 117264-117276 4:01:01 CCTCCTCGCCGCC |
| 117324 117355 113498 117925 CDS product transcriptional regulator ICP4<br>CCCCGGCACCATCCGCCTGGTCGTCCGCGTCC                                   | 117324-117355 6:03:01               |
| 117397 117426 113498 117925 CDS product transcriptional regulator ICP4<br>CCGGACCCGGGGCGCCGGGACCTCCACC                                       | 117397-117426 6:03:01               |
| 117428 117479 113498 117925 CDS product transcriptional regulator ICP4<br>GGGGAGGCCGAGGGTGGAACTCGGGCTGCGGGGACCCGGGGCAGGTCTCGG                | 117428-117479 9:06:02               |
| 117498 117522 113498 117925 CDS product transcriptional regulator ICP4<br>CCGGGTCGGCCGCGTCCCCGCCGCC                                          | 117498-117522 5:02:01               |
| 117523 117547 113498 117925 CDS product transcriptional regulator ICP4<br>GGATGATGAGGAGCCCGTGCCCCGG                                          | 117523-117547 4:01:01               |
| 117536 117565 113498 117925 CDS product transcriptional regulator ICP4<br>CCCGTGGCCCGGCGACCGTTCCCCGGGGCC                                     | 117536-117565 5:02:01               |
| 117560 117577 113498 117925 CDS product transcriptional regulator ICP4<br>GGGGCCACGGAGGAGTGG                                                 | 117560-117577 4:01:01               |
| 117605 117672 113498 117925 CDS product transcriptional regulator ICP4<br>GGAGCCGGGCTGGGTGCCGGGACGCCGGCTGGGCGGCCGCCGGGTAGGAGGACCTCCGGCAGCGGG | 117605-117672 12:09:03              |
| 117676 117693 113498 117925 CDS product transcriptional regulator ICP4<br>CCGCTTCGCCTTCCCTCC                                                 | 117676-117693 4:01:01               |
| 117696 117724 113498 117925 CDS product transcriptional regulator ICP4<br>GGGGCTCGGGAGCCGGGGACGGCGGGGGG                                      | 117696-117724 6:03:01               |

|                                                                                                                   |                                            |
|-------------------------------------------------------------------------------------------------------------------|--------------------------------------------|
| 117759 117783 113498 117925 CDS product transcriptional regulator ICP4<br>CCACCCCGAACATGCCCTGGCTGCC               | 117759-117783 4:01:01                      |
| 117792 117812 113498 117925 CDS product transcriptional regulator ICP4<br>GGTCGGGCGCGGCGGGCTGGG                   | 117792-117812 5:02:01                      |
| 117826 117853 113498 117925 CDS product transcriptional regulator ICP4<br>GGCCGCGCTGGCTGCGCGGATGAGGGGG            | 117826-117853 5:02:01                      |
| 120696 120728 120623 121498 CDS product regulatory protein ICP22<br>CCCCATCATCCCGTCCCTGACCCCTCCCCCCC              | 120696-120728 7:04:01                      |
| 120738 120757 120623 121498 CDS product regulatory protein ICP22                                                  | 120738-120757 4:01:01 CCCGTCCCCACGCTCCAGCC |
| 120788 120821 120623 121498 CDS product regulatory protein ICP22<br>GGCTCCCAGGCGGCTCGGACCATCCGGAATACGG            | 120788-120821 6:03:01                      |
| 120826 120870 120623 121498 CDS product regulatory protein ICP22<br>CCGCTCTCCCCACGGGCCCTGCGCCCGTACCTGGCCCGGGGGCCC | 120826-120870 7:04:01                      |
| 120858 120874 120623 121498 CDS product regulatory protein ICP22                                                  | 120858-120874 4:01:01 GGCCCGGGGGCCCGGGG    |
| 120950 120972 120623 121498 CDS product regulatory protein ICP22<br>CCACCTCCTCGATCCACGTGACC                       | 120950-120972 5:02:01                      |
| 121149 121180 120623 121498 CDS product regulatory protein ICP22<br>CCTGGATCCACCGAGCGACCCCCGAATACCC               | 121149-121180 6:03:01                      |
| 121227 121252 120623 121498 CDS product regulatory protein ICP22<br>GGAGGAGGAAGACGAGGCCAGCGGGG                    | 121227-121252 5:02:01                      |
| 121317 121330 120623 121498 CDS product regulatory protein ICP22                                                  | 121317-121330 4:01:01 GGACGTGGGGGAGG       |
| 121407 121434 120623 121498 CDS product regulatory protein ICP22<br>CCACCCACAACCCGCGCCAGCGCTGCC                   | 121407-121434 5:02:01                      |

|                                                                   |        |        |        |                                                 |               |          |                              |
|-------------------------------------------------------------------|--------|--------|--------|-------------------------------------------------|---------------|----------|------------------------------|
| 123295                                                            | 123316 | 123290 | 124099 | CDS product virion protein V67                  | 123295-123316 | 4:01:01  | GGCCACGGGGGCGTCTTCGGGG       |
| 123339                                                            | 123388 | 123290 | 124099 | CDS product virion protein V67                  | 123339-123388 | 8:05:02  |                              |
| GGCTGCGCGGCTGCCTGGACCCTCTGGAGTGGGGTCCGGGGAGCTCTGG                 |        |        |        |                                                 |               |          |                              |
| 123532                                                            | 123554 | 123290 | 124099 | CDS product virion protein V67                  | 123532-123554 | 5:02:01  | GGCTATGGCGGGGGGAACCTTGG      |
| 123595                                                            | 123611 | 123290 | 124099 | CDS product virion protein V67                  | 123595-123611 | 4:01:01  | GGCATCGGCGGCGTCGG            |
| 123633                                                            | 123652 | 123290 | 124099 | CDS product virion protein V67                  | 123633-123652 | 4:01:01  | CCGCGGGTTCCCTCCTCGCCC        |
| 123668                                                            | 123695 | 123290 | 124099 | CDS product virion protein V67                  | 123668-123695 | 6:03:01  | GGGTAGAGGAACGGCAGGCGGACGAAGG |
| 123736                                                            | 123752 | 123290 | 124099 | CDS product virion protein V67                  | 123736-123752 | 4:01:01  | GGGAGCGGCAGGCGCG             |
| 123765                                                            | 123790 | 123290 | 124099 | CDS product virion protein V67                  | 123765-123790 | 7:04:01  | CCTCTCCGGCCACCACCCCTCGACC    |
| 123939                                                            | 123963 | 123290 | 124099 | CDS product virion protein V67                  | 123939-123963 | 6:03:01  | CCCCCTTGGGCGCCCCCTCGCCGCC    |
| 124008                                                            | 124033 | 123290 | 124099 | CDS product virion protein V67                  | 124008-124033 | 6:03:01  | GGTGGGGCGGGTTGGCATTGCGGCGG   |
| 124060                                                            | 124076 | 123290 | 124099 | CDS product virion protein V67                  | 124060-124076 | 5:02:01  | GGTGCCGGCGGTGGCGG            |
| 124340                                                            | 124406 | 124273 | 125163 | CDS product virion protein US2                  | 124340-124406 | 13:10:03 |                              |
| GGCGGGCGGCCGCGGCCCGGGGCCCCGGGGTGGGGCGTCTCGGTGGCGGATCGAGGGGGCGTGGG |        |        |        |                                                 |               |          |                              |
| 124437                                                            | 124469 | 124273 | 125163 | CDS product virion protein US2                  | 124437-124469 | 8:05:02  |                              |
| CCCCCCTCCGACGGCCGCCGCGCTGCCGCC                                    |        |        |        |                                                 |               |          |                              |
| 125374                                                            | 125396 | 125299 | 126450 | CDS product serine/threonine protein kinase US3 | 125374-125396 | 6:03:01  |                              |
| CCACACCCCGCTGCCACCTACC                                            |        |        |        |                                                 |               |          |                              |
| 126675                                                            | 126708 | 126572 | 127807 | CDS product envelope glycoprotein G             | 126675-126708 | 7:04:01  |                              |
| CCACCCACCAAACACCCAGCCGAACGTCCACCC                                 |        |        |        |                                                 |               |          |                              |
| 126907                                                            | 126921 | 126572 | 127807 | CDS product envelope glycoprotein G             | 126907-126921 | 4:01:01  | CCCTCCCCGAGACC               |
| 127172                                                            | 127191 | 126572 | 127807 | CDS product envelope glycoprotein G             | 127172-127191 | 4:01:01  | CCAGCCCGCACCCGCGTGCC         |
| 127357                                                            | 127370 | 126572 | 127807 | CDS product envelope glycoprotein G             | 127357-127370 | 4:01:01  | CCGCCACCGGACC                |

|                                                     |        |        |        |                                     |               |         |                         |
|-----------------------------------------------------|--------|--------|--------|-------------------------------------|---------------|---------|-------------------------|
| 127510                                              | 127529 | 126572 | 127807 | CDS product envelope glycoprotein G | 127510-127529 | 4:01:01 | CCTCCCGAAACTCCATCGCC    |
| 128146                                              | 128166 | 127991 | 130483 | CDS product envelope glycoprotein J | 128146-128166 | 5:02:01 | CCCACCACGATCCCACCTACC   |
| 128179                                              | 128207 | 127991 | 130483 | CDS product envelope glycoprotein J | 128179-128207 | 5:02:01 |                         |
| CCCCCACATCAACCCACATCCTCCCC                          |        |        |        |                                     |               |         |                         |
| 128282                                              | 128307 | 127991 | 130483 | CDS product envelope glycoprotein J | 128282-128307 | 5:02:01 |                         |
| CCAGCACCACTCTGTCCAACATCC                            |        |        |        |                                     |               |         |                         |
| 128321                                              | 128340 | 127991 | 130483 | CDS product envelope glycoprotein J | 128321-128340 | 4:01:01 | CCACCACAACAACCCCAACC    |
| 128504                                              | 128529 | 127991 | 130483 | CDS product envelope glycoprotein J | 128504-128529 | 5:02:01 |                         |
| CCACCACTGCTCCAACAACGCTTCC                           |        |        |        |                                     |               |         |                         |
| 128900                                              | 128943 | 127991 | 130483 | CDS product envelope glycoprotein J | 128900-128943 | 8:05:02 |                         |
| CCACGTCCACCCCTCAGTTCCACTACCACATCTGCCACTCCC          |        |        |        |                                     |               |         |                         |
| 129302                                              | 129320 | 127991 | 130483 | CDS product envelope glycoprotein J | 129302-129320 | 4:01:01 | CCGACTCTTCCACCGTGCC     |
| 129452                                              | 129479 | 127991 | 130483 | CDS product envelope glycoprotein J | 129452-129479 | 6:03:01 |                         |
| CCACCCCATCACCTCCCCCGGTACCCC                         |        |        |        |                                     |               |         |                         |
| 129577                                              | 129627 | 127991 | 130483 | CDS product envelope glycoprotein J | 129577-129627 | 9:06:02 |                         |
| GGGCGGCACAAAGGTCGCGCAGGGGGTCGTCGGGATGGCCATCAGGGGGGG |        |        |        |                                     |               |         |                         |
| 129736                                              | 129756 | 127991 | 130483 | CDS product envelope glycoprotein J | 129736-129756 | 6:03:01 | CCGCCCCCACCAGACCGACCC   |
| 130058                                              | 130078 | 127991 | 130483 | CDS product envelope glycoprotein J | 130058-130078 | 4:01:01 | CCACAATACCGTGTCAGGCC    |
| 130680                                              | 130708 | 130574 | 131782 | CDS product envelope glycoprotein D | 130680-130708 | 5:02:01 |                         |
| GGTTCGAGGACGCCAGGATCGGCCAAAGG                       |        |        |        |                                     |               |         |                         |
| 131404                                              | 131426 | 130574 | 131782 | CDS product envelope glycoprotein D | 131404-131426 | 5:02:01 | CCCGTGCCTCCGGATAACCACCC |
| 132283                                              | 132305 | 131887 | 133164 | CDS product envelope glycoprotein I | 132283-132305 | 4:01:01 | CCAAACCACAGCCCACAGATTCC |
| 132397                                              | 132419 | 131887 | 133164 | CDS product envelope glycoprotein I | 132397-132419 | 5:02:01 | CCGTCCCCGATCCAATGCCACC  |

|                                              |        |        |        |                                     |               |         |                         |
|----------------------------------------------|--------|--------|--------|-------------------------------------|---------------|---------|-------------------------|
| 132538                                       | 132551 | 131887 | 133164 | CDS product envelope glycoprotein I | 132538-132551 | 4:01:01 | CCACCCAAACCCCC          |
| 132605                                       | 132621 | 131887 | 133164 | CDS product envelope glycoprotein I | 132605-132621 | 4:01:01 | GGTTGTTGGTCGGGAGG       |
| 132745                                       | 132766 | 131887 | 133164 | CDS product envelope glycoprotein I | 132745-132766 | 4:01:01 | CCCCATCGCCTGAACCGAGGCC  |
| 132966                                       | 133001 | 131887 | 133164 | CDS product envelope glycoprotein I | 132966-133001 | 7:04:01 |                         |
| GGACAGGGGGGCACATCGGCGCCGAGCGGAGACGG          |        |        |        |                                     |               |         |                         |
| 133065                                       | 133081 | 131887 | 133164 | CDS product envelope glycoprotein I | 133065-133081 | 5:02:01 | CCTCCAACCCCCAAACC       |
| 133776                                       | 133812 | 133399 | 135051 | CDS product envelope glycoprotein E | 133776-133812 | 6:03:01 |                         |
| CCAATCCTTGCCGAGACCCGCAGCGTCCTACAGATCC        |        |        |        |                                     |               |         |                         |
| 133908                                       | 133927 | 133399 | 135051 | CDS product envelope glycoprotein E | 133908-133927 | 4:01:01 | CCTCCCAAACAACCGCAACC    |
| 133945                                       | 133975 | 133399 | 135051 | CDS product envelope glycoprotein E | 133945-133975 | 6:03:01 |                         |
| CCCCACCACCCGTAACCGTTCCTCAGGTTCC              |        |        |        |                                     |               |         |                         |
| 134174                                       | 134200 | 133399 | 135051 | CDS product envelope glycoprotein E | 134174-134200 | 6:03:01 |                         |
| CCCCACCGCCATGGCCTGCCTGCACCC                  |        |        |        |                                     |               |         |                         |
| 134430                                       | 134447 | 133399 | 135051 | CDS product envelope glycoprotein E | 134430-134447 | 4:01:01 | GGACATCCGGAGGCGTGG      |
| 134852                                       | 134892 | 133399 | 135051 | CDS product envelope glycoprotein E | 134852-134892 | 9:06:02 |                         |
| CCCACCACCTCCAAAACCAGCTCCACAGCTCCCACCATACC    |        |        |        |                                     |               |         |                         |
| 134922                                       | 134945 | 133399 | 135051 | CDS product envelope glycoprotein E | 134922-134945 | 5:02:01 | GGCAGGTCCGATTCAAGGTTTGG |
| 135179                                       | 135199 | 135048 | 135440 | CDS product membrane protein US8A   | 135179-135199 | 4:01:01 | CCCAGATCCGGCTCAACCTCC   |
| 135777                                       | 135790 | 135776 | 136435 | CDS product membrane protein US9    | 135777-135790 | 4:01:01 | GGAGAAGGCGGAGG          |
| 135935                                       | 135948 | 135776 | 136435 | CDS product membrane protein US9    | 135935-135948 | 4:01:01 | CCGCTACCTCCGCC          |
| 136059                                       | 136076 | 135776 | 136435 | CDS product membrane protein US9    | 136059-136076 | 4:01:01 | CCCGTCTCCACCATCACC      |
| 136317                                       | 136361 | 135776 | 136435 | CDS product membrane protein US9    | 136317-136361 | 8:05:02 |                         |
| GGCCCGCAGGCACAGGAGGCGGCGGTGGCCCTTACGGTTGCAGG |        |        |        |                                     |               |         |                         |



|        |        |        |        |                                |
|--------|--------|--------|--------|--------------------------------|
| 137007 | 137023 | 136983 | 137795 | CDS product virion protein V67 |
| 137050 | 137075 | 136983 | 137795 | CDS product virion protein V67 |
| 137120 | 137144 | 136983 | 137795 | CDS product virion protein V67 |
| 137293 | 137318 | 136983 | 137795 | CDS product virion protein V67 |
| 137331 | 137347 | 136983 | 137795 | CDS product virion protein V67 |
| 137388 | 137415 | 136983 | 137795 | CDS product virion protein V67 |
| 137431 | 137450 | 136983 | 137795 | CDS product virion protein V67 |
| 137472 | 137488 | 136983 | 137795 | CDS product virion protein V67 |
| 137529 | 137551 | 136983 | 137795 | CDS product virion protein V67 |
| 137695 | 137744 | 136983 | 137795 | CDS product virion protein V67 |

CCAGAGCTCCCCGGACCCCACTCCAGAGGGTCCAGGCAGCCGCGCAGCC

|        |        |        |        |                                |
|--------|--------|--------|--------|--------------------------------|
| 137767 | 137788 | 136983 | 137795 | CDS product virion protein V67 |
| 138345 | 138365 | 138307 | 139011 | CDS product virion protein     |
| 138376 | 138402 | 138307 | 139011 | CDS product virion protein     |
| 138414 | 138429 | 138307 | 139011 | CDS product virion protein     |
| 138641 | 138663 | 138307 | 139011 | CDS product virion protein     |
| 138707 | 138727 | 138307 | 139011 | CDS product virion protein     |
| 138772 | 138796 | 138307 | 139011 | CDS product virion protein     |
| 138815 | 138828 | 138307 | 139011 | CDS product virion protein     |
| 138918 | 138959 | 138307 | 139011 | CDS product virion protein     |

CCCGTCGGCGCCCGCCCCGTCCTCCGACTCCTCGCC

|        |        |        |        |                                      |
|--------|--------|--------|--------|--------------------------------------|
| 139649 | 139676 | 139587 | 140462 | CDS product regulatory protein ICP22 |
|--------|--------|--------|--------|--------------------------------------|

GGCAGCGCTGGCGCGGGTTGTGGGGTGG

|               |         |                            |
|---------------|---------|----------------------------|
| 137007-137023 | 5:02:01 | CCGCCACCGCCGGCACC          |
| 137050-137075 | 6:03:01 | CCGCCGCAATGCCAACCCGCCCCACC |
| 137120-137144 | 6:03:01 | GGCGGCGAGGGGGCGCCAAGGGGG   |
| 137293-137318 | 7:04:01 | GGTCGAGGGGTGGTGGCCGAGAGG   |
| 137331-137347 | 4:01:01 | CCGCCCTGCCGCTGCC           |
| 137388-137415 | 6:03:01 | CCTTCGTCCGCTGCCGTTCTCTACCC |
| 137431-137450 | 4:01:01 | GGGCGAGGAGAACCCGCGG        |
| 137472-137488 | 4:01:01 | CCGACGCCGCCGATGCC          |
| 137529-137551 | 5:02:01 | CCAAGGTTCCCCCGCCATAGCC     |
| 137695-137744 | 8:05:02 |                            |

|               |         |                        |
|---------------|---------|------------------------|
| 137767-137788 | 4:01:01 | CCCCGAAGACGCCCCCGTGGCC |
|---------------|---------|------------------------|

|               |         |                            |
|---------------|---------|----------------------------|
| 138345-138365 | 5:02:01 | GGCGGTGCGGCGGGCCGCGG       |
| 138376-138402 | 5:02:01 | GGGGGCTTGCGGCCGCGGTGCGCAGG |
| 138414-138429 | 5:02:01 | GGCGGCGTGCGGGGG            |
| 138641-138663 | 4:01:01 | CCACAGGCGCCGCGCCGAGATCC    |
| 138707-138727 | 4:01:01 | GGAAGACGGGCATGGGGCTGG      |
| 138772-138796 | 5:02:01 | GGCCAGGCCTCCGCGGGCGGCCCGG  |
| 138815-138828 | 4:01:01 | CCGCTGCCTCCGCC             |
| 138918-138959 | 8:05:02 |                            |

|               |         |  |
|---------------|---------|--|
| 139649-139676 | 5:02:01 |  |
|---------------|---------|--|

139753 139766 139587 140462 CDS product regulatory protein ICP22  
 139831 139856 139587 140462 CDS product regulatory protein ICP22  
 CCCCCTGGCCTCGTCTTCCTCCTCC  
 139903 139934 139587 140462 CDS product regulatory protein ICP22  
 GGGTATTCGGGGGTCGCTCGGTGGATCCAGG  
 140111 140133 139587 140462 CDS product regulatory protein ICP22  
 GGTCACGTGGATCGAGGAGGTGG  
 140209 140225 139587 140462 CDS product regulatory protein ICP22  
 140213 140257 139587 140462 CDS product regulatory protein ICP22  
 GGGCCCCGGGCCAGGTACGGGCGAGGGCCGTGGGAGAGCGG  
 140262 140295 139587 140462 CDS product regulatory protein ICP22  
 CCGTATTCGGGATGGTCCGAGCCGCTGGGAGCC  
 140326 140345 139587 140462 CDS product regulatory protein ICP22  
 140355 140387 139587 140462 CDS product regulatory protein ICP22  
 GGGGGGAGGGGGTCAGGGACGGGATGATGGGG  
 143230 143257 143160 147587 CDS product transcriptional regulator ICP4  
 CCCCCTCATCCGCGCAGCCAGCGCGGCC  
 143271 143291 143160 147587 CDS product transcriptional regulator ICP4  
 CCCAGCCCGCGCGCCCGACC  
 143300 143324 143160 147587 CDS product transcriptional regulator ICP4  
 GGCAGCCAGGGCATGTTCTGGGGTGG  
 143359 143387 143160 147587 CDS product transcriptional regulator ICP4  
 CCCCCCGCGTCCCCGGCTCCCGAGCCCC

139753-139766 4:01:01 CCTCCCCACGTCC  
 139831-139856 5:02:01  
 139903-139934 6:03:01  
 140111-140133 5:02:01  
 140209-140225 4:01:01 CCCCAGGGCCCCGGGCC  
 140213-140257 7:04:01  
 140262-140295 6:03:01  
 140326-140345 4:01:01 GGCTGGAGCGTGGGACGGG  
 140355-140387 7:04:01  
 143230-143257 5:02:01  
 143271-143291 5:02:01  
 143300-143324 4:01:01  
 143359-143387 6:03:01

|        |        |        |        |                                                                                                                 |               |          |               |
|--------|--------|--------|--------|-----------------------------------------------------------------------------------------------------------------|---------------|----------|---------------|
| 143390 | 143407 | 143160 | 147587 | CDS product transcriptional regulator ICP4<br>GGAGGGAAGGCGAAGCGG                                                | 143390-143407 | 4:01:01  |               |
| 143411 | 143478 | 143160 | 147587 | CDS product transcriptional regulator ICP4<br>CCCCTGCCGGAGGTCCTCCTACCCCGGCGGCCGCCAGCCGGCGTCCCGGCACCCAGCCCGGCTCC | 143411-143478 | 12:09:03 |               |
| 143506 | 143523 | 143160 | 147587 | CDS product transcriptional regulator ICP4<br>CCACTCCTCCGTGGCCCC                                                | 143506-143523 | 4:01:01  |               |
| 143518 | 143547 | 143160 | 147587 | CDS product transcriptional regulator ICP4<br>GGCCCCGGGGAACGGTCGCCGGGCCACGGG                                    | 143518-143547 | 5:02:01  |               |
| 143536 | 143560 | 143160 | 147587 | CDS product transcriptional regulator ICP4<br>CCGGGCCACGGGCTCCTCATCATCC                                         | 143536-143560 | 4:01:01  |               |
| 143561 | 143585 | 143160 | 147587 | CDS product transcriptional regulator ICP4<br>GGCGGCGGGGACGCGGCCGACCCGG                                         | 143561-143585 | 5:02:01  |               |
| 143604 | 143655 | 143160 | 147587 | CDS product transcriptional regulator ICP4<br>CCGAGACCTGCCCGGGTCCCGCAGCCCGAGTTTCCACCCTCGGCCTCCCC                | 143604-143655 | 9:06:02  |               |
| 143657 | 143686 | 143160 | 147587 | CDS product transcriptional regulator ICP4<br>GGTGGAGGGTCCCCGGCGCCCCGGGTCCGG                                    | 143657-143686 | 6:03:01  |               |
| 143728 | 143759 | 143160 | 147587 | CDS product transcriptional regulator ICP4<br>GGACGCGGACGACCAGGCGGATGGTGCCGGGG                                  | 143728-143759 | 6:03:01  |               |
| 143807 | 143819 | 143160 | 147587 | CDS product transcriptional regulator ICP4                                                                      | 143807-143819 | 4:01:01  | GGCGGCGAGGAGG |
| 143843 | 143893 | 143160 | 147587 | CDS product transcriptional regulator ICP4<br>CCGACGCCGCGAAGACCCCGTCGGCCGCCGGCTCTCCCGGGCCGTCCTCC                | 143843-143893 | 9:06:02  |               |
| 143905 | 143928 | 143160 | 147587 | CDS product transcriptional regulator ICP4<br>CCCGGCGGCCGGGGCCGCCACCCC                                          | 143905-143928 | 5:02:01  |               |

|                                                   |        |        |        |                                            |               |          |                |
|---------------------------------------------------|--------|--------|--------|--------------------------------------------|---------------|----------|----------------|
| 143938                                            | 143994 | 143160 | 147587 | CDS product transcriptional regulator ICP4 | 143938-143994 | 10:07:02 |                |
| CCGCTCCGGCGCCGCTTCTCCGGGTGCGCCCGCGCCCGCGCCAGCCGCC |        |        |        |                                            |               |          |                |
| 144004                                            | 144015 | 143160 | 147587 | CDS product transcriptional regulator ICP4 | 144004-144015 | 4:01:01  | CCTCCTCCCTCC   |
| 144110                                            | 144126 | 143160 | 147587 | CDS product transcriptional regulator ICP4 | 144110-144126 | 4:01:01  |                |
| CCGCCGGGCCGGAGCCC                                 |        |        |        |                                            |               |          |                |
| 144192                                            | 144225 | 143160 | 147587 | CDS product transcriptional regulator ICP4 | 144192-144225 | 6:03:01  |                |
| CCAACCCAGACCCATACCCAGACCCAGGCACC                  |        |        |        |                                            |               |          |                |
| 144232                                            | 144266 | 143160 | 147587 | CDS product transcriptional regulator ICP4 | 144232-144266 | 6:03:01  |                |
| GGAGGCCCCGCGGACGGCTCTTGGGACTTGCTGG                |        |        |        |                                            |               |          |                |
| 144279                                            | 144292 | 143160 | 147587 | CDS product transcriptional regulator ICP4 | 144279-144292 | 4:01:01  | CCCAGGCCGCCTCC |
| 144301                                            | 144314 | 143160 | 147587 | CDS product transcriptional regulator ICP4 | 144301-144314 | 4:01:01  | GGCGGCCCCGGTGG |
| 144357                                            | 144379 | 143160 | 147587 | CDS product transcriptional regulator ICP4 | 144357-144379 | 4:01:01  |                |
| CCCCGTCCGGGGACCCCTGGCCC                           |        |        |        |                                            |               |          |                |
| 144365                                            | 144386 | 143160 | 147587 | CDS product transcriptional regulator ICP4 | 144365-144386 | 4:01:01  |                |
| GGGGACCCCTGGCCCGGTCGG                             |        |        |        |                                            |               |          |                |
| 144416                                            | 144449 | 143160 | 147587 | CDS product transcriptional regulator ICP4 | 144416-144449 | 6:03:01  |                |
| GGGGGACCGGGACTCGCGGGACGGGCTGTGGG                  |        |        |        |                                            |               |          |                |
| 144702                                            | 144716 | 143160 | 147587 | CDS product transcriptional regulator ICP4 | 144702-144716 | 4:01:01  | CCAACCCCTGCCCC |
| 144722                                            | 144741 | 143160 | 147587 | CDS product transcriptional regulator ICP4 | 144722-144741 | 4:01:01  |                |
| GGGGATGCCATGGCGCCGG                               |        |        |        |                                            |               |          |                |
| 144771                                            | 144803 | 143160 | 147587 | CDS product transcriptional regulator ICP4 | 144771-144803 | 6:03:01  |                |
| CCGCCTCGGTGGCCATGAGCCGCCGCTACGACC                 |        |        |        |                                            |               |          |                |
| 144823                                            | 144836 | 143160 | 147587 | CDS product transcriptional regulator ICP4 | 144823-144836 | 4:01:01  | CCTCCAGAGCCTCC |

|        |        |        |        |                                                   |               |          |                 |
|--------|--------|--------|--------|---------------------------------------------------|---------------|----------|-----------------|
| 144874 | 144887 | 143160 | 147587 | CDS product transcriptional regulator ICP4        | 144874-144887 | 4:01:01  | GGCGGGGAGGCCGG  |
| 144904 | 144954 | 143160 | 147587 | CDS product transcriptional regulator ICP4        | 144904-144954 | 9:06:02  |                 |
|        |        |        |        | GGCCGGGTCTCGGCCGGCTACCCGGCCCAGGCCGCCGGCAGCGGCCGG  |               |          |                 |
| 144918 | 144940 | 143160 | 147587 | CDS product transcriptional regulator ICP4        | 144918-144940 | 5:02:01  |                 |
|        |        |        |        | CCGGCTACCCGGCCCAGGCCGCC                           |               |          |                 |
| 144965 | 144995 | 143160 | 147587 | CDS product transcriptional regulator ICP4        | 144965-144995 | 6:03:01  |                 |
|        |        |        |        | CCCAGCCCCCGCGGCCTCGGTCCGCGTCC                     |               |          |                 |
| 145044 | 145093 | 143160 | 147587 | CDS product transcriptional regulator ICP4        | 145044-145093 | 10:07:02 |                 |
|        |        |        |        | CCGCCGCGCCGCTCGCGCTCCGGGTACCAGGGCACCCAGGCCGTCCGCC |               |          |                 |
| 145152 | 145166 | 143160 | 147587 | CDS product transcriptional regulator ICP4        | 145152-145166 | 4:01:01  | CCCTCCTGCGCCTCC |
| 145210 | 145231 | 143160 | 147587 | CDS product transcriptional regulator ICP4        | 145210-145231 | 5:02:01  |                 |
|        |        |        |        | CCCCTCTCCCGCCTGCCCTCCC                            |               |          |                 |
| 145252 | 145271 | 143160 | 147587 | CDS product transcriptional regulator ICP4        | 145252-145271 | 5:02:01  |                 |
|        |        |        |        | GGCCGGGCTGGAGACGGCGG                              |               |          |                 |
| 145293 | 145331 | 143160 | 147587 | CDS product transcriptional regulator ICP4        | 145293-145331 | 6:03:01  |                 |
|        |        |        |        | GGGACCTGGTCGAGCGGGCCAGGCTCCTCGGGGACTCGG           |               |          |                 |
| 145333 | 145354 | 143160 | 147587 | CDS product transcriptional regulator ICP4        | 145333-145354 | 5:02:01  |                 |
|        |        |        |        | CCCTACCCACCGCCTGGGCGCC                            |               |          |                 |
| 145428 | 145474 | 143160 | 147587 | CDS product transcriptional regulator ICP4        | 145428-145474 | 8:05:02  |                 |
|        |        |        |        | CCGAGGGGGCCCGGGCCCGGGCCTCGGCCTGGACCGTCACCCAGGCC   |               |          |                 |
| 145432 | 145459 | 143160 | 147587 | CDS product transcriptional regulator ICP4        | 145432-145459 | 6:03:01  |                 |
|        |        |        |        | GGGGGCCCGGGCCCGGGCCTCGGCCTGG                      |               |          |                 |
| 145495 | 145517 | 143160 | 147587 | CDS product transcriptional regulator ICP4        | 145495-145517 | 6:03:01  |                 |

|                                                |                                            |               |         |  |  |  |
|------------------------------------------------|--------------------------------------------|---------------|---------|--|--|--|
| GGTCGGGGGGATGTTGGGGGAGG                        |                                            |               |         |  |  |  |
| 145518 145539 143160 147587                    | CDS product transcriptional regulator ICP4 | 145518-145539 | 4:01:01 |  |  |  |
| CCGTGTCCCTGCTAGCCCCACC                         |                                            |               |         |  |  |  |
| 145548 145570 143160 147587                    | CDS product transcriptional regulator ICP4 | 145548-145570 | 5:02:01 |  |  |  |
| CCCAGCCCTCCTCGTCTTCCCC                         |                                            |               |         |  |  |  |
| 145585 145612 143160 147587                    | CDS product transcriptional regulator ICP4 | 145585-145612 | 5:02:01 |  |  |  |
| CCAGCAGCCCTTCTCCGGCTCCTCGGCC                   |                                            |               |         |  |  |  |
| 145601 145621 143160 147587                    | CDS product transcriptional regulator ICP4 | 145601-145621 | 4:01:01 |  |  |  |
| GGTCCTCGGCCGCGGAGGGG                           |                                            |               |         |  |  |  |
| 145624 145650 143160 147587                    | CDS product transcriptional regulator ICP4 | 145624-145650 | 6:03:01 |  |  |  |
| CCTTCCGCCCCTGTGGCCACCGTCCC                     |                                            |               |         |  |  |  |
| 145686 145706 143160 147587                    | CDS product transcriptional regulator ICP4 | 145686-145706 | 4:01:01 |  |  |  |
| CCCAGTCCCCCAGCACTCCC                           |                                            |               |         |  |  |  |
| 145725 145772 143160 147587                    | CDS product transcriptional regulator ICP4 | 145725-145772 | 9:06:02 |  |  |  |
| CCGCGACAGCCACCTGCTCCCGGCCACCCAGACCAGCGCCCGTCCC |                                            |               |         |  |  |  |
| 145809 145832 143160 147587                    | CDS product transcriptional regulator ICP4 | 145809-145832 | 6:03:01 |  |  |  |
| CCGCCTCCCCGGCCACCTCAGCC                        |                                            |               |         |  |  |  |
| 145883 145912 143160 147587                    | CDS product transcriptional regulator ICP4 | 145883-145912 | 4:01:01 |  |  |  |
| GGGCGCCCCCGGGCAAGAGCGGCAAGCGG                  |                                            |               |         |  |  |  |
| 145917 145940 143160 147587                    | CDS product transcriptional regulator ICP4 | 145917-145940 | 4:01:01 |  |  |  |
| CCGAGCCCCTAGAGCCGGCGGCCC                       |                                            |               |         |  |  |  |
| 145933 145955 143160 147587                    | CDS product transcriptional regulator ICP4 | 145933-145955 | 5:02:01 |  |  |  |
| GGCGGCCAGGCTGGAGCCCCGG                         |                                            |               |         |  |  |  |

|                                                              |        |        |        |                                            |               |          |                  |
|--------------------------------------------------------------|--------|--------|--------|--------------------------------------------|---------------|----------|------------------|
| 145950                                                       | 145973 | 143160 | 147587 | CDS product transcriptional regulator ICP4 | 145950-145973 | 5:02:01  |                  |
| CCCCGGCCTTCTCCTCGTCCGCC                                      |        |        |        |                                            |               |          |                  |
| 146008                                                       | 146020 | 143160 | 147587 | CDS product transcriptional regulator ICP4 | 146008-146020 | 4:01:01  | CCCTCCTGCCCCC    |
| 146028                                                       | 146067 | 143160 | 147587 | CDS product transcriptional regulator ICP4 | 146028-146067 | 6:03:01  |                  |
| GGGTGGCCACCCAGGGCCACCAGGCTCCCCGGGCCCTGGG                     |        |        |        |                                            |               |          |                  |
| 146034                                                       | 146093 | 143160 | 147587 | CDS product transcriptional regulator ICP4 | 146034-146093 | 11:08:02 |                  |
| CCACCCAGGGCCACCAGGCTCCCCGGGCCCTGGGACCCATGCCCGCCGAGGGCCCCGACC |        |        |        |                                            |               |          |                  |
| 146157                                                       | 146179 | 143160 | 147587 | CDS product transcriptional regulator ICP4 | 146157-146179 | 4:01:01  |                  |
| CCTGCGCAGCCTACTGTCCCCC                                       |        |        |        |                                            |               |          |                  |
| 146203                                                       | 146232 | 143160 | 147587 | CDS product transcriptional regulator ICP4 | 146203-146232 | 5:02:01  |                  |
| CCACCCGCTGTTCCCGAGGCCTGGCGCCC                                |        |        |        |                                            |               |          |                  |
| 146241                                                       | 146276 | 143160 | 147587 | CDS product transcriptional regulator ICP4 | 146241-146276 | 6:03:01  |                  |
| CCTTCGATCCCCAGGCCCTAGCCACCATCGCGGCC                          |        |        |        |                                            |               |          |                  |
| 146285                                                       | 146304 | 143160 | 147587 | CDS product transcriptional regulator ICP4 | 146285-146304 | 4:01:01  |                  |
| GGACCCCGGCCAGGGACGG                                          |        |        |        |                                            |               |          |                  |
| 146383                                                       | 146399 | 143160 | 147587 | CDS product transcriptional regulator ICP4 | 146383-146399 | 4:01:01  |                  |
| GGACGTGAAGGTGGTGG                                            |        |        |        |                                            |               |          |                  |
| 146443                                                       | 146458 | 143160 | 147587 | CDS product transcriptional regulator ICP4 | 146443-146458 | 4:01:01  | CCCGGCCGCCGCCCCC |
| 146497                                                       | 146530 | 143160 | 147587 | CDS product transcriptional regulator ICP4 | 146497-146530 | 6:03:01  |                  |
| GGGGGACTCTCGGCGTGCTGGCGGCCCTGGGG                             |        |        |        |                                            |               |          |                  |
| 146523                                                       | 146566 | 143160 | 147587 | CDS product transcriptional regulator ICP4 | 146523-146566 | 7:04:01  |                  |
| CCCTGGGGAACGCGTCCTACCAAGCGGTCCCACGCCTGGGCC                   |        |        |        |                                            |               |          |                  |
| 146562                                                       | 146597 | 143160 | 147587 | CDS product transcriptional regulator ICP4 | 146562-146597 | 6:03:01  |                  |

|                                                                                                                             |               |         |
|-----------------------------------------------------------------------------------------------------------------------------|---------------|---------|
| GGGCCGGCAACTGGACCGGAGCCCCGGACGTCTCGG                                                                                        |               |         |
| 146598 146650 143160 147587 CDS product transcriptional regulator ICP4<br>CCCTCAACGCCAGGGGTCTGCTCCTCTCCACGGGGACCTGGCCTTCACC | 146598-146650 | 9:06:02 |
| 146665 146689 143160 147587 CDS product transcriptional regulator ICP4<br>CCTCTGCCTCCGCTGGGCTCCGCC                          | 146665-146689 | 6:03:01 |
| 146728 146745 143160 147587 CDS product transcriptional regulator ICP4<br>GGACTGGCCCCAGGACGG                                | 146728-146745 | 4:01:01 |
| 146819 146840 143160 147587 CDS product transcriptional regulator ICP4<br>CCCCGGGAGGCCACCTCAGCC                             | 146819-146840 | 4:01:01 |
| 146994 147012 143160 147587 CDS product transcriptional regulator ICP4<br>CCCGCGTCCCCCTGCCTCC                               | 146994-147012 | 5:02:01 |
| 147127 147160 143160 147587 CDS product transcriptional regulator ICP4<br>CCACCGCGCGCCAACCGCTGGGGCCTCGGGGCC                 | 147127-147160 | 6:03:01 |
| 147169 147191 143160 147587 CDS product transcriptional regulator ICP4<br>CCCCGTGTACCTCGCTGCGGCC                            | 147169-147191 | 4:01:01 |
| 147188 147221 143160 147587 CDS product transcriptional regulator ICP4<br>GGCCGGCGCGGAGCCGGGGCCGTGGAGCCCTCGG                | 147188-147221 | 6:03:01 |
| 147275 147296 143160 147587 CDS product transcriptional regulator ICP4<br>CCCGACGCCGAGCCGGACCCC                             | 147275-147296 | 4:01:01 |
| 147305 147336 143160 147587 CDS product transcriptional regulator ICP4<br>CCCATCACCGAGGCTCCCCGCCCGGGCCCC                    | 147305-147336 | 6:03:01 |
| 147443 147467 143160 147587 CDS product transcriptional regulator ICP4<br>GGGGCCGGCGACGTGGAGCTGGTGG                         | 147443-147467 | 5:02:01 |



|                                                                    |        |        |        |                                                  |               |                                |
|--------------------------------------------------------------------|--------|--------|--------|--------------------------------------------------|---------------|--------------------------------|
| 147468                                                             | 147520 | 143160 | 147587 | CDS product transcriptional regulator ICP4       | 147468-147520 | 10:07:02                       |
| CCGACCACCCGGCCCTAGCCCCGGCGGCCAGGCCCTCCGCCGCTCCC                    |        |        |        |                                                  |               |                                |
| 147532                                                             | 147567 | 143160 | 147587 | CDS product transcriptional regulator ICP4       | 147532-147567 | 7:04:01                        |
| GGTGGTGTCGGACGACGAGGACGGTGGAGACTGGGG                               |        |        |        |                                                  |               |                                |
| gi 281190771 ref NC_013590.2  Felid herpesvirus 1, complete genome |        |        |        |                                                  |               |                                |
| 4446                                                               | 4464   | 3482   | 4798   | CDS product multifunctional expression regulator | 4446-4464     | 4:01:01                        |
| GGCGCATGTGGATTGGTGG                                                |        |        |        |                                                  |               |                                |
| 4664                                                               | 4695   | 3482   | 4798   | CDS product multifunctional expression regulator | 4664-4695     | 6:03:01                        |
| GGTTCTGGAGGTGTCGGGGAGGTCTCATCGGG                                   |        |        |        |                                                  |               |                                |
| 5248                                                               | 5269   | 4919   | 5953   | CDS product envelope glycoprotein K              | 5248-5269     | 4:01:01 CCCCATCAAGACCACCTTCGCC |
| 5685                                                               | 5702   | 4919   | 5953   | CDS product envelope glycoprotein K              | 5685-5702     | 4:01:01 CCAGGGCCAAATCCTTCC     |
| 6598                                                               | 6613   | 5963   | 9151   | CDS product helicase-primase primase subunit     | 6598-6613     | 4:01:01 CCCACCATCACCAACC       |
| 6783                                                               | 6801   | 5963   | 9151   | CDS product helicase-primase primase subunit     | 6783-6801     | 5:02:01                        |
| GGTATGGAGGTGGTATTGG                                                |        |        |        |                                                  |               |                                |
| 7043                                                               | 7061   | 5963   | 9151   | CDS product helicase-primase primase subunit     | 7043-7061     | 4:01:01                        |
| GGTTGAGGGGGCATGAGG                                                 |        |        |        |                                                  |               |                                |
| 7170                                                               | 7188   | 5963   | 9151   | CDS product helicase-primase primase subunit     | 7170-7188     | 4:01:01                        |
| GGACTGGAAGTGGGATAGG                                                |        |        |        |                                                  |               |                                |
| 7810                                                               | 7826   | 5963   | 9151   | CDS product helicase-primase primase subunit     | 7810-7826     | 4:01:01                        |
| GGGATAGGTTTTGGAGG                                                  |        |        |        |                                                  |               |                                |
| 8563                                                               | 8580   | 5963   | 9151   | CDS product helicase-primase primase subunit     | 8563-8580     | 4:01:01                        |
| GGAGGTCTCGGGTTTGG                                                  |        |        |        |                                                  |               |                                |

|                                               |       |       |       |                                                   |             |                                    |
|-----------------------------------------------|-------|-------|-------|---------------------------------------------------|-------------|------------------------------------|
| 8886                                          | 8905  | 5963  | 9151  | CDS product helicase-primase primase subunit      | 8886-8905   | 5:02:01                            |
| GGACGGCGGCTAGATGGTGG                          |       |       |       |                                                   |             |                                    |
| 9166                                          | 9191  | 9150  | 9878  | CDS product tegument protein UL51                 | 9166-9191   | 5:02:01 GGCAGGTCTGTGTGGAATCCGGTGG  |
| 9531                                          | 9547  | 9150  | 9878  | CDS product tegument protein UL51                 | 9531-9547   | 4:01:01 CCGTAGATACCACCACC          |
| 9927                                          | 9956  | 9923  | 10900 | CDS product deoxyuridine triphosphatase           | 9927-9956   | 5:02:01                            |
| CCCCGGTTGACCCAAATCCTTTATCCCCC                 |       |       |       |                                                   |             |                                    |
| 10031                                         | 10059 | 9923  | 10900 | CDS product deoxyuridine triphosphatase           | 10031-10059 | 5:02:01                            |
| GGTGCAGGTTCTGGGGTTTCTGGAAATGG                 |       |       |       |                                                   |             |                                    |
| 11302                                         | 11327 | 11185 | 12222 | CDS product tegument protein VP22                 | 11302-11327 | 4:01:01 CCACAGAAACCCCTCCGCGAGTCCCC |
| 11742                                         | 11786 | 11185 | 12222 | CDS product tegument protein VP22                 | 11742-11786 | 8:05:02                            |
| CCTCCCTACCCACACCAAGTTAAACCAAGAGCCGCGCCGGGTACC |       |       |       |                                                   |             |                                    |
| 11829                                         | 11848 | 11185 | 12222 | CDS product tegument protein VP22                 | 11829-11848 | 4:01:01 CCAAGAACCTCATCCACGCC       |
| 12138                                         | 12158 | 11185 | 12222 | CDS product tegument protein VP22                 | 12138-12158 | 5:02:01 CCTAAGACCAGATCCTCCTCC      |
| 12504                                         | 12523 | 12355 | 13698 | CDS product transactivating tegument protein VP16 | 12504-12523 | 4:01:01                            |
| CCACCAAAACCTGCTAGCCC                          |       |       |       |                                                   |             |                                    |
| 12906                                         | 12948 | 12355 | 13698 | CDS product transactivating tegument protein VP16 | 12906-12948 | 8:05:02                            |
| GGTGCGCGCGAGGCCAAGGGATAAAGGTAAGGGGGTAACGG     |       |       |       |                                                   |             |                                    |
| 13496                                         | 13538 | 12355 | 13698 | CDS product transactivating tegument protein VP16 | 13496-13538 | 7:04:01                            |
| CCCACCATCACCAAGTGCCGTGCTTCCAGGGGATCCAGATCCC   |       |       |       |                                                   |             |                                    |
| 14430                                         | 14446 | 14066 | 16642 | CDS product tegument protein VP13/14              | 14430-14446 | 4:01:01 GCGGAAGGGGATTTCGG          |
| 14547                                         | 14563 | 14066 | 16642 | CDS product tegument protein VP13/14              | 14547-14563 | 4:01:01 GGTGGATATGGAGAGG           |
| 14638                                         | 14662 | 14066 | 16642 | CDS product tegument protein VP13/14              | 14638-14662 | 5:02:01                            |
| GGGGATGGGGGGAAGAGGATGTGG                      |       |       |       |                                                   |             |                                    |

|                                            |       |       |       |                                           |
|--------------------------------------------|-------|-------|-------|-------------------------------------------|
| 14800                                      | 14818 | 14066 | 16642 | CDS product tegument protein VP13/14      |
| 14929                                      | 14947 | 14066 | 16642 | CDS product tegument protein VP13/14      |
| 15222                                      | 15241 | 14066 | 16642 | CDS product tegument protein VP13/14      |
| 15524                                      | 15541 | 14066 | 16642 | CDS product tegument protein VP13/14      |
| 15542                                      | 15563 | 14066 | 16642 | CDS product tegument protein VP13/14      |
| 15840                                      | 15855 | 14066 | 16642 | CDS product tegument protein VP13/14      |
| 16372                                      | 16389 | 14066 | 16642 | CDS product tegument protein VP13/14      |
| 16566                                      | 16582 | 14066 | 16642 | CDS product tegument protein VP13/14      |
| 16607                                      | 16625 | 14066 | 16642 | CDS product tegument protein VP13/14      |
| 17425                                      | 17445 | 16720 | 18882 | CDS product tegument protein VP11/12      |
| 17782                                      | 17799 | 16720 | 18882 | CDS product tegument protein VP11/12      |
| 18089                                      | 18115 | 16720 | 18882 | CDS product tegument protein VP11/12      |
| CCTCCCACTACCATCCCCACCCACTCC                |       |       |       |                                           |
| 19536                                      | 19554 | 19053 | 19634 | CDS product membrane protein UL45         |
| 20670                                      | 20691 | 19884 | 21488 | CDS product envelope glycoprotein C       |
| 21161                                      | 21181 | 19884 | 21488 | CDS product envelope glycoprotein C       |
| 21234                                      | 21252 | 19884 | 21488 | CDS product envelope glycoprotein C       |
| 21303                                      | 21345 | 19884 | 21488 | CDS product envelope glycoprotein C       |
| GGAGATGTTGGCTGGGATATCGGGTGGTAGCGGACATGCTGG |       |       |       |                                           |
| 22536                                      | 22558 | 21674 | 22921 | CDS product envelope protein UL43         |
| 24942                                      | 24970 | 24698 | 26059 | CDS product tegument host shutoff protein |
| GGATAGAGGTATCTATGGTGATGGACAGG              |       |       |       |                                           |
| 25017                                      | 25039 | 24698 | 26059 | CDS product tegument host shutoff protein |

|             |         |                        |
|-------------|---------|------------------------|
| 14800-14818 | 4:01:01 | GGTGGTCGTGGAGCAGAGG    |
| 14929-14947 | 5:02:01 | GGAGAATGGCGGAGGCTGG    |
| 15222-15241 | 4:01:01 | GGGTTGTTGGTTTGGAGCGG   |
| 15524-15541 | 4:01:01 | GGATGGTAGGAAGAACGG     |
| 15542-15563 | 4:01:01 | CCATACGACCACTCCAACACC  |
| 15840-15855 | 4:01:01 | GGTGGCGGTGCAGTGG       |
| 16372-16389 | 4:01:01 | CCAATGCCGGGTCCACCC     |
| 16566-16582 | 4:01:01 | GGGACGCAAGGGCTGG       |
| 16607-16625 | 4:01:01 | GGAGACGAGGGAGGCGGGG    |
| 17425-17445 | 4:01:01 | GGTGGCTCTTATGGTTCATGG  |
| 17782-17799 | 4:01:01 | GGGCTGAGGGAGGTATGG     |
| 18089-18115 | 6:03:01 |                        |
|             |         |                        |
| 19536-19554 | 4:01:01 | GGTGGGTTAGGCTCGTTGG    |
| 20670-20691 | 5:02:01 | CCATCTCCACCATAGACCCGCC |
| 21161-21181 | 4:01:01 | GGCTGCCTGGGTGGTACTCGG  |
| 21234-21252 | 4:01:01 | GGCTGGGATGCCTGGGTGG    |
| 21303-21345 | 7:04:01 |                        |
|             |         |                        |
| 22536-22558 | 4:01:01 | CCCATCCAAGTCCGCTATGGCC |
| 24942-24970 | 5:02:01 |                        |
|             |         |                        |
| 25017-25039 | 5:02:01 |                        |

|                                              |       |       |       |                                                |                                              |
|----------------------------------------------|-------|-------|-------|------------------------------------------------|----------------------------------------------|
| GGGTGGATCTGGACGCTTGGGGG                      |       |       |       |                                                |                                              |
| 26275                                        | 26305 | 26195 | 27190 | CDS product ribonucleotide reductase subunit 2 | 26275-26305 6:03:01                          |
| GGCTAAGGGAAAATCGGGATGAGGAGGCGGG              |       |       |       |                                                |                                              |
| 26757                                        | 26779 | 26195 | 27190 | CDS product ribonucleotide reductase subunit 2 | 26757-26779 4:01:01                          |
| CCACATAGGCCGTACGCGCCTCC                      |       |       |       |                                                |                                              |
| 27127                                        | 27170 | 26195 | 27190 | CDS product ribonucleotide reductase subunit 2 | 27127-27170 8:05:02                          |
| GGATACCGGCATTTTGGTATTGGAGTGGAGACCGGTATTGGGGG |       |       |       |                                                |                                              |
| 28407                                        | 28424 | 27204 | 29564 | CDS product ribonucleotide reductase subunit 1 | 28407-28424 5:02:01                          |
| CCCATACCAGCCGCCTCC                           |       |       |       |                                                |                                              |
| 28513                                        | 28539 | 27204 | 29564 | CDS product ribonucleotide reductase subunit 1 | 28513-28539 5:02:01                          |
| CCTCTCCGCCTAGGTGCCGTTGATACC                  |       |       |       |                                                |                                              |
| 29091                                        | 29126 | 27204 | 29564 | CDS product ribonucleotide reductase subunit 1 | 29091-29126 5:02:01                          |
| CCCATCGATTCCAAAGCTCCATTTCCAGGTTGCC           |       |       |       |                                                |                                              |
| 29960                                        | 29980 | 29793 | 31184 | CDS product capsid triplex subunit 1           | 29960-29980 4:01:01 GGCACGGCCGCGCAGGTCAGG    |
| 29995                                        | 30014 | 29793 | 31184 | CDS product capsid triplex subunit 1           | 29995-30014 5:02:01 GGGCTGCGGTGGCTTGGGGG     |
| 30075                                        | 30105 | 29793 | 31184 | CDS product capsid triplex subunit 1           | 30075-30105 6:03:01                          |
| GGAAATCTGGCTCGTGGGTCCGTGGCGGGGG              |       |       |       |                                                |                                              |
| 30660                                        | 30682 | 29793 | 31184 | CDS product capsid triplex subunit 1           | 30660-30682 5:02:01 CCTTCTCCTGAATCCCTACCACC  |
| 30773                                        | 30808 | 29793 | 31184 | CDS product capsid triplex subunit 1           | 30773-30808 7:04:01                          |
| GGCTGGATGGCGTAAGGTGAGGATTGGAAGACCCGG         |       |       |       |                                                |                                              |
| 32781                                        | 32804 | 31532 | 34615 | CDS product tegument protein UL37              | 32781-32804 4:01:01 GGATGAGGCGCAACAGGCAATTGG |
| 33582                                        | 33602 | 31532 | 34615 | CDS product tegument protein UL37              | 33582-33602 4:01:01 GGTCATGCTGGTCCCGGAGGG    |
| 34538                                        | 34566 | 31532 | 34615 | CDS product tegument protein UL37              | 34538-34566 5:02:01                          |

CCTGGGTTACCCAGAAGACCTCCTCGCC

|       |       |       |       |                                             |
|-------|-------|-------|-------|---------------------------------------------|
| 36620 | 36637 | 34835 | 43936 | CDS product large tegument protein          |
| 37483 | 37503 | 34835 | 43936 | CDS product large tegument protein          |
| 37686 | 37708 | 34835 | 43936 | CDS product large tegument protein          |
| 37701 | 37722 | 34835 | 43936 | CDS product large tegument protein          |
| 38745 | 38767 | 34835 | 43936 | CDS product large tegument protein          |
| 39453 | 39474 | 34835 | 43936 | CDS product large tegument protein          |
| 40682 | 40705 | 34835 | 43936 | CDS product large tegument protein          |
| 41838 | 41858 | 34835 | 43936 | CDS product large tegument protein          |
| 42438 | 42460 | 34835 | 43936 | CDS product large tegument protein          |
| 42755 | 42779 | 34835 | 43936 | CDS product large tegument protein          |
| 42845 | 42861 | 34835 | 43936 | CDS product large tegument protein          |
| 44819 | 44836 | 44482 | 45297 | CDS product nuclear egress membrane protein |
| 45195 | 45214 | 44482 | 45297 | CDS product nuclear egress membrane protein |
| 46137 | 46154 | 45831 | 47579 | CDS product DNA packaging protein UL32      |
| 47210 | 47224 | 45831 | 47579 | CDS product DNA packaging protein UL32      |
| 47468 | 47494 | 45831 | 47579 | CDS product DNA packaging protein UL32      |

CCTCCCAAGCCAACGGCCGGGGCAGCC

|                         |       |       |       |                                              |
|-------------------------|-------|-------|-------|----------------------------------------------|
| 49110                   | 49130 | 48509 | 52126 | CDS product DNA polymerase catalytic subunit |
| CCAGTACCCTTCCAAATTCCC   |       |       |       |                                              |
| 49679                   | 49701 | 48509 | 52126 | CDS product DNA polymerase catalytic subunit |
| CCATTAGCCACCCCGGTAAATCC |       |       |       |                                              |
| 49777                   | 49796 | 48509 | 52126 | CDS product DNA polymerase catalytic subunit |

|             |         |                           |
|-------------|---------|---------------------------|
| 36620-36637 | 4:01:01 | CCCACCTCGCCGAACGCC        |
| 37483-37503 | 4:01:01 | GGTGCGGATGAGGTTATGCGG     |
| 37686-37708 | 4:01:01 | GGCGGGATTTGTTGGCCTGAGGG   |
| 37701-37722 | 4:01:01 | CCTGAGGGCCGCACCCGGAGCC    |
| 38745-38767 | 4:01:01 | CCTTACTATCCATCCAGTGATCC   |
| 39453-39474 | 5:02:01 | CCCCCACCACCCTCAATAGCC     |
| 40682-40705 | 5:02:01 | GGCAATATGGCAGGTCTGGAAGG   |
| 41838-41858 | 5:02:01 | CCCGGTACCCCAAAACCACC      |
| 42438-42460 | 4:01:01 | GGGGGCTTTATCGGATACCTGGG   |
| 42755-42779 | 4:01:01 | GGGACGGTGACGACGGACCTGATGG |
| 42845-42861 | 4:01:01 | CCATATCCGTACCCCCC         |
| 44819-44836 | 4:01:01 | CCTCCGGGCCCATGAACC        |
| 45195-45214 | 4:01:01 | GGGTGGATTTTTTGGGTTGG      |
| 46137-46154 | 4:01:01 | GGCGGAAGTTTGGATTGG        |
| 47210-47224 | 4:01:01 | GGGGATGGTGGGCGG           |
| 47468-47494 | 5:02:01 |                           |

49110-49130 4:01:01

49679-49701 4:01:01

49777-49796 4:01:01

|                              |       |       |       |                                                 |             |                          |
|------------------------------|-------|-------|-------|-------------------------------------------------|-------------|--------------------------|
| GGGAATACGGGCCCGGATGG         |       |       |       |                                                 |             |                          |
| 50232                        | 50251 | 48509 | 52126 | CDS product DNA polymerase catalytic subunit    | 50232-50251 | 4:01:01                  |
| GGTTGCGGTTATCAGGTAGG         |       |       |       |                                                 |             |                          |
| 50432                        | 50457 | 48509 | 52126 | CDS product DNA polymerase catalytic subunit    | 50432-50457 | 5:02:01                  |
| CCTATTATCCCCGTTGCCTGGCACC    |       |       |       |                                                 |             |                          |
| 50508                        | 50524 | 48509 | 52126 | CDS product DNA polymerase catalytic subunit    | 50508-50524 | 4:01:01                  |
| CCCCTAAGGCCTCCTCC            |       |       |       |                                                 |             |                          |
| 51549                        | 51571 | 48509 | 52126 | CDS product DNA polymerase catalytic subunit    | 51549-51571 | 4:01:01                  |
| CCCTATCCACTAGATCCTTATCC      |       |       |       |                                                 |             |                          |
| 53294                        | 53314 | 52392 | 55994 | CDS product single-stranded DNA-binding protein | 53294-53314 | 4:01:01                  |
| GGGGGAGATGGAGCCTCTGGG        |       |       |       |                                                 |             |                          |
| 53509                        | 53523 | 52392 | 55994 | CDS product single-stranded DNA-binding protein | 53509-53523 | 4:01:01 GGCTGGATTGGTAGG  |
| 53576                        | 53601 | 52392 | 55994 | CDS product single-stranded DNA-binding protein | 53576-53601 | 5:02:01                  |
| GGTGGGGCCGTGGATGGTAAAGATGG   |       |       |       |                                                 |             |                          |
| 53620                        | 53643 | 52392 | 55994 | CDS product single-stranded DNA-binding protein | 53620-53643 | 4:01:01                  |
| CCGTTTTTACCTAATCCAGCACC      |       |       |       |                                                 |             |                          |
| 54908                        | 54935 | 52392 | 55994 | CDS product single-stranded DNA-binding protein | 54908-54935 | 6:03:01                  |
| CCACCCGGGAGCCAGACTCCAAACCCCC |       |       |       |                                                 |             |                          |
| 54964                        | 54983 | 52392 | 55994 | CDS product single-stranded DNA-binding protein | 54964-54983 | 4:01:01                  |
| CCAGATGCCGGCCCCGTCTCC        |       |       |       |                                                 |             |                          |
| 55424                        | 55449 | 52392 | 55994 | CDS product single-stranded DNA-binding protein | 55424-55449 | 5:02:01                  |
| GGAAATTGGAGTGGGTTGAATGGAGG   |       |       |       |                                                 |             |                          |
| 55538                        | 55553 | 52392 | 55994 | CDS product single-stranded DNA-binding protein | 55538-55553 | 5:02:01 GGGGGTGGTGGGGGGG |

|                                                   |       |       |       |                                                 |             |         |                       |
|---------------------------------------------------|-------|-------|-------|-------------------------------------------------|-------------|---------|-----------------------|
| 55601                                             | 55622 | 52392 | 55994 | CDS product single-stranded DNA-binding protein | 55601-55622 | 4:01:01 |                       |
| GGTGGACCCATGGTTCAAACGG                            |       |       |       |                                                 |             |         |                       |
| 57019                                             | 57043 | 56050 | 58389 | CDS product DNA packaging terminase subunit 2   | 57019-57043 | 5:02:01 |                       |
| GGCTGGCCTCAGCGGGATTGGACGG                         |       |       |       |                                                 |             |         |                       |
| 57303                                             | 57328 | 56050 | 58389 | CDS product DNA packaging terminase subunit 2   | 57303-57328 | 5:02:01 |                       |
| CCACTACTCCGCCAACTGACCAACCC                        |       |       |       |                                                 |             |         |                       |
| 57436                                             | 57464 | 56050 | 58389 | CDS product DNA packaging terminase subunit 2   | 57436-57464 | 5:02:01 |                       |
| CCCAATCGGACCGGGCCATAGACTCCCC                      |       |       |       |                                                 |             |         |                       |
| 58000                                             | 58014 | 56050 | 58389 | CDS product DNA packaging terminase subunit 2   | 58000-58014 | 4:01:01 | GGGGTGGGTGGACGG       |
| 58253                                             | 58302 | 56050 | 58389 | CDS product DNA packaging terminase subunit 2   | 58253-58302 | 7:04:01 |                       |
| GGCGATCTTGGAAGCGGCGACGAGGGAGTCGTTGGCAGGGACACAGTGG |       |       |       |                                                 |             |         |                       |
| 58661                                             | 58677 | 58242 | 61088 | CDS product envelope glycoprotein B             | 58661-58677 | 4:01:01 | CCACCACGGGCCTGTCC     |
| 58809                                             | 58829 | 58242 | 61088 | CDS product envelope glycoprotein B             | 58809-58829 | 4:01:01 | CCTATGCCGTTACAACCAACC |
| 59589                                             | 59609 | 58242 | 61088 | CDS product envelope glycoprotein B             | 59589-59609 | 4:01:01 | CCCTGGAGACCTACCTAGCCC |
| 59996                                             | 60014 | 58242 | 61088 | CDS product envelope glycoprotein B             | 59996-60014 | 4:01:01 | GGTGGGGTGGTCTCGATGG   |
| 60475                                             | 60493 | 58242 | 61088 | CDS product envelope glycoprotein B             | 60475-60493 | 4:01:01 | CCGCAACCAACTCCACGCC   |
| 60574                                             | 60620 | 58242 | 61088 | CDS product envelope glycoprotein B             | 60574-60620 | 9:06:02 |                       |
| GGGACTCGGGGATGTGGGGCTGGTTTCGGCAAGGTGGTCTTAGGGG    |       |       |       |                                                 |             |         |                       |
| 61008                                             | 61040 | 58242 | 61088 | CDS product envelope glycoprotein B             | 61008-61040 | 6:03:01 |                       |
| CCCTCCGTCGCCGTGGACCTAAATACCAACGCC                 |       |       |       |                                                 |             |         |                       |
| 62292                                             | 62306 | 61769 | 62653 | CDS product capsid scaffold protein             | 62292-62306 | 4:01:01 | GGGACGGGGAGGTGG       |
| 62435                                             | 62467 | 61769 | 62653 | CDS product capsid scaffold protein             | 62435-62467 | 8:05:02 |                       |
| GGATGGAAATGGTTTGGAGGGAGGGGTGGATGG                 |       |       |       |                                                 |             |         |                       |

|                                       |       |       |       |                                                 |             |         |                            |
|---------------------------------------|-------|-------|-------|-------------------------------------------------|-------------|---------|----------------------------|
| 62509                                 | 62529 | 61769 | 62653 | CDS product capsid scaffold protein             | 62509-62529 | 5:02:01 | GGCCGGGGGTATTGGATAGG       |
| 62609                                 | 62630 | 61769 | 62653 | CDS product capsid scaffold protein             | 62609-62630 | 5:02:01 | GGGGTTGTGGATGGCTTATGG      |
| 63254                                 | 63277 | 61769 | 63565 | CDS product capsid maturation protease          | 63254-63277 | 4:01:01 | CCCTCCTTTACTCCAAAAACCCC    |
| 64161                                 | 64183 | 63696 | 65567 | CDS product DNA packaging tegument protein UL25 | 64161-64183 | 4:01:01 |                            |
| CCCAAATCCCCCGGTTGCCCC                 |       |       |       |                                                 |             |         |                            |
| 65131                                 | 65159 | 63696 | 65567 | CDS product DNA packaging tegument protein UL25 | 65131-65159 | 6:03:01 |                            |
| CCGCCGTTTCGCTTCCCGTGCTACCTCC          |       |       |       |                                                 |             |         |                            |
| 66100                                 | 66114 | 65590 | 66372 | CDS product nuclear protein UL24                | 66100-66114 | 4:01:01 | CCACCCCTTCTCCC             |
| 66322                                 | 66341 | 65590 | 66372 | CDS product nuclear protein UL24                | 66322-66341 | 4:01:01 | CCAGCCCGGAGCCTCAATCC       |
| 67065                                 | 67081 | 66387 | 67418 | CDS product thymidine kinase                    | 67065-67081 | 4:01:01 | GGCGTGATGGGTGGGG           |
| 68200                                 | 68215 | 67658 | 70123 | CDS product envelope glycoprotein H             | 68200-68215 | 5:02:01 | CCGACCACCTCCGGCC           |
| 68340                                 | 68358 | 67658 | 70123 | CDS product envelope glycoprotein H             | 68340-68358 | 4:01:01 | GGAGGGGATGTGGATATGG        |
| 69858                                 | 69872 | 67658 | 70123 | CDS product envelope glycoprotein H             | 69858-69872 | 4:01:01 | GGAGTTGGTGGCTGG            |
| 70423                                 | 70439 | 70246 | 71829 | CDS product tegument protein UL21               | 70423-70439 | 4:01:01 | CCATCTATTCCGCCACC          |
| 71029                                 | 71053 | 70246 | 71829 | CDS product tegument protein UL21               | 71029-71053 | 4:01:01 | CCAGATGCCCGATCCCTAGGATCCC  |
| 71648                                 | 71663 | 70246 | 71829 | CDS product tegument protein UL21               | 71648-71663 | 4:01:01 | CCCCTTCCCCACACC            |
| 73047                                 | 73069 | 73018 | 77151 | CDS product major capsid protein                | 73047-73069 | 4:01:01 | CCAATAGCCGATTTCACCACCCC    |
| 73338                                 | 73357 | 73018 | 77151 | CDS product major capsid protein                | 73338-73357 | 4:01:01 | CCCCACCCTGTAAACCAACC       |
| 73860                                 | 73885 | 73018 | 77151 | CDS product major capsid protein                | 73860-73885 | 4:01:01 | GGCATACGGCAACGGCTCTTAAGGGG |
| 74286                                 | 74323 | 73018 | 77151 | CDS product major capsid protein                | 74286-74323 | 6:03:01 |                            |
| CCAGCTCCCGGACAACCCGATTCCCGTGTTTCCCACC |       |       |       |                                                 |             |         |                            |
| 74684                                 | 74707 | 73018 | 77151 | CDS product major capsid protein                | 74684-74707 | 6:03:01 | CCAGCCAGGTCACCAGAACCACC    |
| 74834                                 | 74852 | 73018 | 77151 | CDS product major capsid protein                | 74834-74852 | 5:02:01 | CCCAGCCACCGTTGCCGCC        |



|                                       |       |       |       |                                      |                                                |
|---------------------------------------|-------|-------|-------|--------------------------------------|------------------------------------------------|
| 75158                                 | 75177 | 73018 | 77151 | CDS product major capsid protein     | 75158-75177 4:01:01 GGCTGGTCGGGATCACGAGG       |
| 75200                                 | 75217 | 73018 | 77151 | CDS product major capsid protein     | 75200-75217 4:01:01 CCATGCCCTTCTCCCCC          |
| 75311                                 | 75336 | 73018 | 77151 | CDS product major capsid protein     | 75311-75336 4:01:01 GGTACCGTGGGTCGAGATGGCCCAGG |
| 75397                                 | 75427 | 73018 | 77151 | CDS product major capsid protein     | 75397-75427 5:02:01                            |
| CCAGGGCCCCAATCATCCCACACCACGGTCC       |       |       |       |                                      |                                                |
| 75554                                 | 75576 | 73018 | 77151 | CDS product major capsid protein     | 75554-75576 5:02:01 GGATCTGGGAAGGGATGAGGAGG    |
| 75579                                 | 75616 | 73018 | 77151 | CDS product major capsid protein     | 75579-75616 7:04:01                            |
| CCTGCATACCCGATGACCCCCGCCACCCTCTAAACCC |       |       |       |                                      |                                                |
| 75735                                 | 75758 | 73018 | 77151 | CDS product major capsid protein     | 75735-75758 5:02:01 CCCATTCTCACCGCCGCCGACCC    |
| 75772                                 | 75786 | 73018 | 77151 | CDS product major capsid protein     | 75772-75786 4:01:01 CCACGGCCACCACCC            |
| 75978                                 | 75996 | 73018 | 77151 | CDS product major capsid protein     | 75978-75996 5:02:01 CCACCCGTACCGCCTTTCC        |
| 76268                                 | 76279 | 73018 | 77151 | CDS product major capsid protein     | 76268-76279 4:01:01 GGCGGTAGGTGG               |
| 76306                                 | 76330 | 73018 | 77151 | CDS product major capsid protein     | 76306-76330 4:01:01 GGGCCAACGTGGATCTGGGTGTAGG  |
| 76745                                 | 76764 | 73018 | 77151 | CDS product major capsid protein     | 76745-76764 4:01:01 CCCATGGGCCTCCCAACGCC       |
| 76903                                 | 76931 | 73018 | 77151 | CDS product major capsid protein     | 76903-76931 5:02:01                            |
| CCGGGTCCAGTTTAGCCCCAAGCACCGCC         |       |       |       |                                      |                                                |
| 77595                                 | 77619 | 77323 | 78261 | CDS product capsid triplex subunit 2 | 77595-77619 5:02:01                            |
| CCACTTCCTCCTGGTGCCTTTATCC             |       |       |       |                                      |                                                |
| 77733                                 | 77754 | 77323 | 78261 | CDS product capsid triplex subunit 2 | 77733-77754 4:01:01 CCATCCACTGTACCAGTAGCCC     |
| 77805                                 | 77829 | 77323 | 78261 | CDS product capsid triplex subunit 2 | 77805-77829 6:03:01                            |
| GGTGCCGGTGGGAGACGGGGGATGG             |       |       |       |                                      |                                                |
| 77965                                 | 77988 | 77323 | 78261 | CDS product capsid triplex subunit 2 | 77965-77988 4:01:01 CCTTGATACCGAACCTACTCACCC   |
| 78052                                 | 78087 | 77323 | 78261 | CDS product capsid triplex subunit 2 | 78052-78087 7:04:01                            |

|                                      |       |       |       |                                                 |                                             |
|--------------------------------------|-------|-------|-------|-------------------------------------------------|---------------------------------------------|
| CCCAACTAATCCATCGACCACCAGTCCACCCTCCCC |       |       |       |                                                 |                                             |
| 78406                                | 78425 | 78345 | 83970 | CDS product DNA packaging terminase subunit 1   | 78406-78425 4:01:01                         |
| CCGCCATTACCAGAGCTACC                 |       |       |       |                                                 |                                             |
| 78704                                | 78718 | 78345 | 83970 | CDS product DNA packaging terminase subunit 1   | 78704-78718 4:01:01 GGTCCGAGGAATGGG         |
| 79504                                | 79524 | 78345 | 83970 | CDS product DNA packaging terminase subunit 1   | 79504-79524 4:01:01                         |
| GGCCTCGGATACCCTGGAGGG                |       |       |       |                                                 |                                             |
| 79930                                | 79954 | 79666 | 81741 | CDS product DNA packaging tegument protein UL17 | 79930-79954 4:01:01                         |
| CCAATACCCCTTGCCAAACATGTCC            |       |       |       |                                                 |                                             |
| 80284                                | 80301 | 79666 | 81741 | CDS product DNA packaging tegument protein UL17 | 80284-80301 4:01:01                         |
| CCAACCACACCCAATCCC                   |       |       |       |                                                 |                                             |
| 80339                                | 80353 | 79666 | 81741 | CDS product DNA packaging tegument protein UL17 | 80339-80353 4:01:01 GGTGAATGGAGGGGG         |
| 80425                                | 80452 | 79666 | 81741 | CDS product DNA packaging tegument protein UL17 | 80425-80452 5:02:01                         |
| CCTCGGAGGCCATAACCACCAGACACCC         |       |       |       |                                                 |                                             |
| 80480                                | 80503 | 79666 | 81741 | CDS product DNA packaging tegument protein UL17 | 80480-80503 5:02:01                         |
| GGATGGTTGTGGAGTGGCATCTGG             |       |       |       |                                                 |                                             |
| 80866                                | 80880 | 79666 | 81741 | CDS product DNA packaging tegument protein UL17 | 80866-80880 4:01:01 GGGGTGGGAGGAGGG         |
| 81029                                | 81040 | 79666 | 81741 | CDS product DNA packaging tegument protein UL17 | 81029-81040 4:01:01 CCTGCCACCACC            |
| 81455                                | 81471 | 79666 | 81741 | CDS product DNA packaging tegument protein UL17 | 81455-81471 4:01:01                         |
| GGCGGAACCTTTGGCGG                    |       |       |       |                                                 |                                             |
| 82174                                | 82186 | 81772 | 82863 | CDS product tegument protein UL16               | 82174-82186 4:01:01 CCATCCCCCTCCC           |
| 82313                                | 82325 | 81772 | 82863 | CDS product tegument protein UL16               | 82313-82325 4:01:01 GGGGTATGGTGG            |
| 82366                                | 82388 | 81772 | 82863 | CDS product tegument protein UL16               | 82366-82388 4:01:01 CCACGCTCCTCGCCCTATGCCCC |
| 83055                                | 83079 | 78345 | 83970 | CDS product DNA packaging terminase subunit 1   | 83055-83079 4:01:01                         |

|                             |       |       |       |                                                      |             |                                   |
|-----------------------------|-------|-------|-------|------------------------------------------------------|-------------|-----------------------------------|
| CCTCGCTCCAATTCCTCAAACACC    |       |       |       |                                                      |             |                                   |
| 83648                       | 83672 | 78345 | 83970 | CDS product DNA packaging terminase subunit 1        | 83648-83672 | 6:03:01                           |
| CCGAACCGGACACCGCCTCCTCCCC   |       |       |       |                                                      |             |                                   |
| 83784                       | 83810 | 78345 | 83970 | CDS product DNA packaging terminase subunit 1        | 83784-83810 | 5:02:01                           |
| GGGTACAACGGTCTGGTGGCGCTGGGG |       |       |       |                                                      |             |                                   |
| 84529                       | 84549 | 84007 | 84975 | CDS product tegument protein UL14                    | 84529-84549 | 6:03:01 GGGGGTCCGGGAAGGGGGGGG     |
| 84748                       | 84765 | 84007 | 84975 | CDS product tegument protein UL14                    | 84748-84765 | 4:01:01 GGCTGGTAACGAGAAGG         |
| 85139                       | 85158 | 84417 | 86237 | CDS product tegument serine/threonine protein kinase | 85139-85158 | 5:02:01                           |
| GGGGGGGCTGGTGGGTATGG        |       |       |       |                                                      |             |                                   |
| 85445                       | 85463 | 84417 | 86237 | CDS product tegument serine/threonine protein kinase | 85445-85463 | 4:01:01                           |
| GGGTTGGGTAAGGCTGTGG         |       |       |       |                                                      |             |                                   |
| 85855                       | 85879 | 84417 | 86237 | CDS product tegument serine/threonine protein kinase | 85855-85879 | 4:01:01                           |
| CCTTTCCCTCGGTTACCGGTCCCC    |       |       |       |                                                      |             |                                   |
| 86229                       | 86248 | 86222 | 87856 | CDS product deoxyribonuclease                        | 86229-86248 | 4:01:01 CCAATTAACCAACCCACGCC      |
| 86746                       | 86770 | 86222 | 87856 | CDS product deoxyribonuclease                        | 86746-86770 | 4:01:01 CCCTATGGACCTGTATACCCACCCC |
| 87139                       | 87158 | 86222 | 87856 | CDS product deoxyribonuclease                        | 87139-87158 | 4:01:01 CCCGAATCCTCTCCCCGCC       |
| 87476                       | 87497 | 86222 | 87856 | CDS product deoxyribonuclease                        | 87476-87497 | 4:01:01 CCACGCCCATCTTCGCCAATCC    |
| 88684                       | 88706 | 88143 | 89411 | CDS product envelope glycoprotein M                  | 88684-88706 | 4:01:01 GGGATGTAGTGCGATGGAGAGG    |
| 89511                       | 89532 | 89398 | 91980 | CDS product DNA replication origin-binding helicase  | 89511-89532 | 4:01:01                           |
| GGAGGTGATTTGGGAGAGTGGG      |       |       |       |                                                      |             |                                   |
| 89592                       | 89612 | 89398 | 91980 | CDS product DNA replication origin-binding helicase  | 89592-89612 | 5:02:01                           |
| CCATCACCAGTCTCCACCACC       |       |       |       |                                                      |             |                                   |
| 90425                       | 90444 | 89398 | 91980 | CDS product DNA replication origin-binding helicase  | 90425-90444 | 4:01:01                           |

|                                 |        |        |        |                                               |               |                                   |
|---------------------------------|--------|--------|--------|-----------------------------------------------|---------------|-----------------------------------|
| GGAGGAAGTTGGGGTCTGGG            |        |        |        |                                               |               |                                   |
| 92278                           | 92294  | 91995  | 94343  | CDS product helicase-primase subunit          | 92278-92294   | 4:01:01 GGCAGCGGCTGGAGAGG         |
| 92513                           | 92530  | 91995  | 94343  | CDS product helicase-primase subunit          | 92513-92530   | 4:01:01 CCGGTGCCGGTCCCAGCC        |
| 92599                           | 92618  | 91995  | 94343  | CDS product helicase-primase subunit          | 92599-92618   | 5:02:01 GGGGGGAGGATTGGCAAGGG      |
| 93128                           | 93147  | 91995  | 94343  | CDS product helicase-primase subunit          | 93128-93147   | 4:01:01 GGTATGTGGCCGCAATGGG       |
| 93426                           | 93455  | 91995  | 94343  | CDS product helicase-primase subunit          | 93426-93455   | 5:02:01                           |
| GGGAAAAGGGAGGGCTGAAGGCAGCATTGG  |        |        |        |                                               |               |                                   |
| 94175                           | 94196  | 91995  | 94343  | CDS product helicase-primase subunit          | 94175-94196   | 4:01:01 CCACATCCGGCCATTATTCCCC    |
| 94545                           | 94559  | 94402  | 95292  | CDS product tegument protein UL7              | 94545-94559   | 4:01:01 CCGCCTCTCCGATCC           |
| 96909                           | 96939  | 95177  | 97330  | CDS product capsid portal protein             | 96909-96939   | 6:03:01                           |
| CCCTTACCGCTTCCGCCTCACCGTGGTTACC |        |        |        |                                               |               |                                   |
| 97864                           | 97880  | 97406  | 99997  | CDS product helicase-primase helicase subunit | 97864-97880   | 4:01:01                           |
| CCTTCTAACCCACCACC               |        |        |        |                                               |               |                                   |
| 99048                           | 99070  | 97406  | 99997  | CDS product helicase-primase helicase subunit | 99048-99070   | 5:02:01                           |
| GGATGGAATACTGGTCTCGGAGG         |        |        |        |                                               |               |                                   |
| 99573                           | 99592  | 97406  | 99997  | CDS product helicase-primase helicase subunit | 99573-99592   | 4:01:01                           |
| CCTTAATCGCCGCCGAATCC            |        |        |        |                                               |               |                                   |
| 100072                          | 100092 | 100065 | 100775 | CDS product nuclear protein UL4               | 100072-100092 | 5:02:01 CCACCAGACAACCTTCCACCC     |
| 100394                          | 100415 | 100065 | 100775 | CDS product nuclear protein UL4               | 100394-100415 | 5:02:01 GGTTGGTCCGGTGTGGGATGG     |
| 101322                          | 101346 | 100841 | 101386 | CDS product protein V57                       | 101322-101346 | 5:02:01 CCATGGAAGCCGCCCTCCCAACACC |
| 101943                          | 101961 | 101390 | 101995 | CDS product nuclear protein UL3               | 101943-101961 | 4:01:01 CCGGCCATCCCCATTCCCC       |
| 102543                          | 102573 | 102101 | 102982 | CDS product uracil-DNA glycosylase            | 102543-102573 | 5:02:01                           |
| GGCCATTGGCTTGACCGGGTCCGTGGTATGG |        |        |        |                                               |               |                                   |

|        |        |        |        |                                                      |               |         |                     |
|--------|--------|--------|--------|------------------------------------------------------|---------------|---------|---------------------|
| 103079 | 103089 | 103037 | 103480 | CDS product envelope glycoprotein L                  | 103079-103089 | 4:01:01 | GGAGGCGGTGG         |
| 104207 | 104229 | 104175 | 105671 | CDS product ubiquitin E3 ligase ICP0                 | 104207-104229 | 4:01:01 |                     |
|        |        |        |        | CCCAGATACCCTCCTACGACCCC                              |               |         |                     |
| 104441 | 104460 | 104175 | 105671 | CDS product ubiquitin E3 ligase ICP0                 | 104441-104460 | 4:01:01 | GGTGTGGGAGGTCCATCGG |
| 105629 | 105653 | 104175 | 105671 | CDS product ubiquitin E3 ligase ICP0                 | 105629-105653 | 4:01:01 |                     |
|        |        |        |        | GGGATCAAGGCATATTGGACAGTGG                            |               |         |                     |
| 107245 | 107263 | 107219 | 111415 | CDS product transcriptional regulator ICP4           | 107245-107263 | 4:01:01 |                     |
|        |        |        |        | CCATCCACTCTCCGCGTCC                                  |               |         |                     |
| 107430 | 107453 | 107219 | 111415 | CDS product transcriptional regulator ICP4           | 107430-107453 | 4:01:01 |                     |
|        |        |        |        | CCTGTTTTCCAAATCCCGAGTCCC                             |               |         |                     |
| 107668 | 107687 | 107219 | 111415 | CDS product transcriptional regulator ICP4           | 107668-107687 | 4:01:01 |                     |
|        |        |        |        | GGCACGATGGCTGTGGGCGG                                 |               |         |                     |
| 107736 | 107754 | 107219 | 111415 | CDS product transcriptional regulator ICP4           | 107736-107754 | 4:01:01 |                     |
|        |        |        |        | CCTCCATATCCTTACACCC                                  |               |         |                     |
| 107790 | 107815 | 107219 | 111415 | CDS product transcriptional regulator ICP4           | 107790-107815 | 4:01:01 |                     |
|        |        |        |        | GGGGTAACATGGGAACGGGTGTGCGG                           |               |         |                     |
| 107965 | 107985 | 107219 | 111415 | CDS product transcriptional regulator ICP4           | 107965-107985 | 4:01:01 |                     |
|        |        |        |        | GGAGAGGTCCTCTAGGGCCGG                                |               |         |                     |
| 107973 | 107995 | 107219 | 111415 | CDS product transcriptional regulator ICP4           | 107973-107995 | 4:01:01 |                     |
|        |        |        |        | CCTCTAGGGCCGCCAGCGCACC                               |               |         |                     |
| 108007 | 108058 | 107219 | 111415 | CDS product transcriptional regulator ICP4           | 108007-108058 | 9:06:02 |                     |
|        |        |        |        | GGTCGGGGTGACCGTGGCGCGGATGTATAGGTGGTAATGGCTCACGGCCGGG |               |         |                     |
| 108054 | 108071 | 107219 | 111415 | CDS product transcriptional regulator ICP4           | 108054-108071 | 4:01:01 |                     |

|                                               |        |        |        |                                            |               |                         |
|-----------------------------------------------|--------|--------|--------|--------------------------------------------|---------------|-------------------------|
| CCGGGCCCCGTCGCCGGCC                           |        |        |        |                                            |               |                         |
| 108216                                        | 108242 | 107219 | 111415 | CDS product transcriptional regulator ICP4 | 108216-108242 | 5:02:01                 |
| CCGGGGGACCACTCCAATTCCTGCCC                    |        |        |        |                                            |               |                         |
| 108256                                        | 108271 | 107219 | 111415 | CDS product transcriptional regulator ICP4 | 108256-108271 | 5:02:01 GGGGAGAGGAGGCGG |
| 108468                                        | 108500 | 107219 | 111415 | CDS product transcriptional regulator ICP4 | 108468-108500 | 8:05:02                 |
| CCACCAGCCCCCGAGACCTGTACCCTCCTGCC              |        |        |        |                                            |               |                         |
| 108646                                        | 108659 | 107219 | 111415 | CDS product transcriptional regulator ICP4 | 108646-108659 | 4:01:01 GGTGGGTCTGGGG   |
| 108719                                        | 108747 | 107219 | 111415 | CDS product transcriptional regulator ICP4 | 108719-108747 | 5:02:01                 |
| GGCATGGGTCCAAGGGGACCCCTAGGGG                  |        |        |        |                                            |               |                         |
| 108763                                        | 108774 | 107219 | 111415 | CDS product transcriptional regulator ICP4 | 108763-108774 | 4:01:01 GGTGGGTGGTGG    |
| 108817                                        | 108861 | 107219 | 111415 | CDS product transcriptional regulator ICP4 | 108817-108861 | 7:04:01                 |
| GGCATCGATGGGGAGGTTGCCGGATGCGTGGCCCCGGGGAAGCGG |        |        |        |                                            |               |                         |
| 108889                                        | 108921 | 107219 | 111415 | CDS product transcriptional regulator ICP4 | 108889-108921 | 7:04:01                 |
| GGATTGGGGGCGGTGAGGTGGGTGAAAGGGG               |        |        |        |                                            |               |                         |
| 109029                                        | 109047 | 107219 | 111415 | CDS product transcriptional regulator ICP4 | 109029-109047 | 5:02:01                 |
| CCTCCACCGTGACTCCCCC                           |        |        |        |                                            |               |                         |
| 109066                                        | 109106 | 107219 | 111415 | CDS product transcriptional regulator ICP4 | 109066-109106 | 9:06:02                 |
| GGTCGCCCGGGGGTGGGAGTATGGGGTTCGGGGTACCGG       |        |        |        |                                            |               |                         |
| 109103                                        | 109117 | 107219 | 111415 | CDS product transcriptional regulator ICP4 | 109103-109117 | 4:01:01 CCGGCGACCTCCTCC |
| 109215                                        | 109232 | 107219 | 111415 | CDS product transcriptional regulator ICP4 | 109215-109232 | 4:01:01                 |
| GGGGGCCAGGGTCCTGG                             |        |        |        |                                            |               |                         |
| 109397                                        | 109435 | 107219 | 111415 | CDS product transcriptional regulator ICP4 | 109397-109435 | 6:03:01                 |
| GGGGGGCAGACGGCGAGGGGTACTTGGCCACCGAGGGG        |        |        |        |                                            |               |                         |

|                                                                                                                     |               |         |                  |
|---------------------------------------------------------------------------------------------------------------------|---------------|---------|------------------|
| 109579 109599 107219 111415 CDS product transcriptional regulator ICP4<br>GGGAGTTGGTATCTGGGTGGG                     | 109579-109599 | 4:01:01 |                  |
| 109602 109630 107219 111415 CDS product transcriptional regulator ICP4<br>CCCCCGTTCCCCTGGTCGTCCCCCGCC               | 109602-109630 | 6:03:01 |                  |
| 109687 109716 107219 111415 CDS product transcriptional regulator ICP4<br>GGATGTGGGGGTTTTTGGGGGGCGTCGGG             | 109687-109716 | 6:03:01 |                  |
| 109881 109916 107219 111415 CDS product transcriptional regulator ICP4<br>GGGGGAGAGCCAGGAGAGGGTCCATGGTCGCCATGG      | 109881-109916 | 6:03:01 |                  |
| 109929 109943 107219 111415 CDS product transcriptional regulator ICP4                                              | 109929-109943 | 4:01:01 | GGGGGAGGGGATTGG  |
| 109977 109991 107219 111415 CDS product transcriptional regulator ICP4                                              | 109977-109991 | 4:01:01 | GGGGGCCGTGGATGG  |
| 110140 110162 107219 111415 CDS product transcriptional regulator ICP4<br>GGGAACCGGGCCGGGTCCGCGG                    | 110140-110162 | 4:01:01 |                  |
| 110190 110232 107219 111415 CDS product transcriptional regulator ICP4<br>CCGGAGCGTCCCACAGACCTTCCCTCGAGTCCCGATCCCCC | 110190-110232 | 7:04:01 |                  |
| 110268 110283 107219 111415 CDS product transcriptional regulator ICP4                                              | 110268-110283 | 4:01:01 | CCGGCCAGACCTCTCC |
| 110300 110316 107219 111415 CDS product transcriptional regulator ICP4<br>GGTCCTGTGGTTGGGGG                         | 110300-110316 | 4:01:01 |                  |
| 110341 110363 107219 111415 CDS product transcriptional regulator ICP4<br>CCTTTCCGAGATCCTCTCGGCC                    | 110341-110363 | 4:01:01 |                  |
| 110383 110421 107219 111415 CDS product transcriptional regulator ICP4<br>GGCCCCGCGAAGTCTGGAACCTGGGGGGCGGGATAGCGG   | 110383-110421 | 7:04:01 |                  |
| 110584 110613 107219 111415 CDS product transcriptional regulator ICP4<br>GGCAGGCCGAGGGGGAGACGGGGTCCCCGG            | 110584-110613 | 6:03:01 |                  |

|                                                          |        |        |        |                                                 |               |         |                          |
|----------------------------------------------------------|--------|--------|--------|-------------------------------------------------|---------------|---------|--------------------------|
| 110630                                                   | 110666 | 107219 | 111415 | CDS product transcriptional regulator ICP4      | 110630-110666 | 7:04:01 |                          |
| GGTGGTGGCTGGTGGCGATGGGGACCGTGAGGTGCTGG                   |        |        |        |                                                 |               |         |                          |
| 110878                                                   | 110933 | 107219 | 111415 | CDS product transcriptional regulator ICP4      | 110878-110933 | 9:06:02 |                          |
| GGGGCTATGGGCGGATGAATCGGTGATGGAGAGGGCGTTGCTGGGATGGGAACAGG |        |        |        |                                                 |               |         |                          |
| 111056                                                   | 111089 | 107219 | 111415 | CDS product transcriptional regulator ICP4      | 111056-111089 | 8:05:02 |                          |
| GGGGGTGGTGGTGGTTAGTGGTGGGTCCCGAGG                        |        |        |        |                                                 |               |         |                          |
| 114453                                                   | 114474 | 114384 | 115388 | CDS product regulatory protein ICP22            | 114453-114474 | 4:01:01 |                          |
| GGAGCGGTCGATTGGGTCATGG                                   |        |        |        |                                                 |               |         |                          |
| 114539                                                   | 114556 | 114384 | 115388 | CDS product regulatory protein ICP22            | 114539-114556 | 4:01:01 | CCCAGTCCCATCCTCCCC       |
| 114916                                                   | 114934 | 114384 | 115388 | CDS product regulatory protein ICP22            | 114916-114934 | 4:01:01 | CCAACGTCCGACCAGAGCC      |
| 114977                                                   | 115017 | 114384 | 115388 | CDS product regulatory protein ICP22            | 114977-115017 | 7:04:01 |                          |
| CCCCTGCGAGCCACCTTACGCCACCTCAATACCACTGAACC                |        |        |        |                                                 |               |         |                          |
| 115112                                                   | 115124 | 114384 | 115388 | CDS product regulatory protein ICP22            | 115112-115124 | 4:01:01 | GGTGAGGGGGTGG            |
| 115243                                                   | 115261 | 114384 | 115388 | CDS product regulatory protein ICP22            | 115243-115261 | 4:01:01 | GGATGAAACGGAGGATCGG      |
| 115707                                                   | 115730 | 115629 | 116270 | CDS product virion protein US10                 | 115707-115730 | 4:01:01 | GGGGGGACTCCGCGGATCACGCGG |
| 115828                                                   | 115852 | 115629 | 116270 | CDS product virion protein US10                 | 115828-115852 | 4:01:01 | GGACATATGGCCCGGGTATATCGG |
| 115891                                                   | 115905 | 115629 | 116270 | CDS product virion protein US10                 | 115891-115905 | 4:01:01 | GGAGGGTAGCGGGG           |
| 115970                                                   | 115992 | 115629 | 116270 | CDS product virion protein US10                 | 115970-115992 | 4:01:01 | CCCGCAAACCCAGAATCCCATCC  |
| 118694                                                   | 118713 | 117698 | 118753 | CDS product serine/threonine protein kinase US3 | 118694-118713 | 4:01:01 |                          |
| CCAAGTTCCGACCATCGGCC                                     |        |        |        |                                                 |               |         |                          |
| 119461                                                   | 119485 | 118880 | 120184 | CDS product envelope glycoprotein G             | 119461-119485 | 4:01:01 |                          |
| CCATTTGACCATCATCCCCAAAGCC                                |        |        |        |                                                 |               |         |                          |
| 119911                                                   | 119927 | 118880 | 120184 | CDS product envelope glycoprotein G             | 119911-119927 | 5:02:01 | CCACCACCAACCCATCC        |



121287 121316 120583 121707 CDS product envelope glycoprotein D  
 CCCTATAACCCACAACCTCACCATAAAGCC  
 122129 122150 121834 122988 CDS product envelope glycoprotein I  
 123559 123577 123167 124765 CDS product envelope glycoprotein E  
 123915 123930 123167 124765 CDS product envelope glycoprotein E  
 125548 125577 125212 125670 CDS product membrane protein US9  
 GGCGACGGAGGCGGTGTCTGGTGGCACTGG  
 126239 126261 125963 126604 CDS product virion protein US10  
 126326 126340 125963 126604 CDS product virion protein US10  
 126379 126403 125963 126604 CDS product virion protein US10  
 126501 126524 125963 126604 CDS product virion protein US10  
 126970 126988 126845 127849 CDS product regulatory protein ICP22  
 127107 127119 126845 127849 CDS product regulatory protein ICP22  
 127214 127254 126845 127849 CDS product regulatory protein ICP22  
 GGTTCAGTGGTATTGAGGTGGCGTAAGGTGGCTCGCAGGGG  
 127297 127315 126845 127849 CDS product regulatory protein ICP22  
 127675 127692 126845 127849 CDS product regulatory protein ICP22  
 127757 127778 126845 127849 CDS product regulatory protein ICP22  
 CCATGACCCAATCGACCGCTCC  
 131142 131175 130818 135014 CDS product transcriptional regulator ICP4  
 CCTCGGGACCCACCCTAAACCACCACCACCC  
 131298 131353 130818 135014 CDS product transcriptional regulator ICP4  
 CCTGTTCCCATCCCAGCAACGCCCTCTCCATCACCGATTCATCGCCCATAGCCCC

121287-121316 5:02:01  
 122129-122150 4:01:01 CCGGTCCTGTCTCCACAAGACC  
 123559-123577 4:01:01 GGCCTTGGTATTACAGGGG  
 123915-123930 4:01:01 CCCCCATGCCGCATCC  
 125548-125577 7:04:01  
 126239-126261 4:01:01 GGATGGGATTCTGTTTTGCGGG  
 126326-126340 4:01:01 CCCCCGCTACCCTCC  
 126379-126403 4:01:01 CCGATATACCCGGGCCATATGTCC  
 126501-126524 4:01:01 CCGCGTGATCCGCGGAGTCCCCC  
 126970-126988 4:01:01 CCGATCCTCCGTTTCATCC  
 127107-127119 4:01:01 CCACCCCTCACC  
 127214-127254 7:04:01  
 127297-127315 4:01:01 GGCTCTGGTCGGACGTTGG  
 127675-127692 4:01:01 GGGGAGGATGGGACTGGG  
 127757-127778 4:01:01  
 131142-131175 8:05:02  
 131298-131353 9:06:02

|                                             |        |        |        |                                            |               |         |                  |
|---------------------------------------------|--------|--------|--------|--------------------------------------------|---------------|---------|------------------|
| 131565                                      | 131601 | 130818 | 135014 | CDS product transcriptional regulator ICP4 | 131565-131601 | 7:04:01 |                  |
| CCAGCACCTCACGGTCCCCATCGCCACCAGCACCACC       |        |        |        |                                            |               |         |                  |
| 131618                                      | 131647 | 130818 | 135014 | CDS product transcriptional regulator ICP4 | 131618-131647 | 6:03:01 |                  |
| CCGGGGACCCCGTCTCCCCCTCGGCCTGCC              |        |        |        |                                            |               |         |                  |
| 131810                                      | 131848 | 130818 | 135014 | CDS product transcriptional regulator ICP4 | 131810-131848 | 7:04:01 |                  |
| CCGCTATCCCGCCCCCAGGTTCCAGACTTCCGCGGGCC      |        |        |        |                                            |               |         |                  |
| 131868                                      | 131890 | 130818 | 135014 | CDS product transcriptional regulator ICP4 | 131868-131890 | 4:01:01 |                  |
| GGGCCGAGAGGATCTCGGAAAGG                     |        |        |        |                                            |               |         |                  |
| 131915                                      | 131931 | 130818 | 135014 | CDS product transcriptional regulator ICP4 | 131915-131931 | 4:01:01 |                  |
| CCCCCAACCACAGGACC                           |        |        |        |                                            |               |         |                  |
| 131948                                      | 131963 | 130818 | 135014 | CDS product transcriptional regulator ICP4 | 131948-131963 | 4:01:01 | GGAGAGGTCTGGCCGG |
| 131999                                      | 132041 | 130818 | 135014 | CDS product transcriptional regulator ICP4 | 131999-132041 | 7:04:01 |                  |
| GGGGGGATCGGGGACTCGAGGGAAGGTCTGTGGGACGCTCCGG |        |        |        |                                            |               |         |                  |
| 132069                                      | 132091 | 130818 | 135014 | CDS product transcriptional regulator ICP4 | 132069-132091 | 4:01:01 |                  |
| CCGCGGACCCCGGCCCGTTCCC                      |        |        |        |                                            |               |         |                  |
| 132240                                      | 132254 | 130818 | 135014 | CDS product transcriptional regulator ICP4 | 132240-132254 | 4:01:01 | CCATCCACGGCCCCC  |
| 132288                                      | 132302 | 130818 | 135014 | CDS product transcriptional regulator ICP4 | 132288-132302 | 4:01:01 | CCAATCCCCTCCCCC  |
| 132315                                      | 132350 | 130818 | 135014 | CDS product transcriptional regulator ICP4 | 132315-132350 | 6:03:01 |                  |
| CCATGGCGACCATGGACCCCTCTCCTGGCTCTCCCCC       |        |        |        |                                            |               |         |                  |
| 132515                                      | 132544 | 130818 | 135014 | CDS product transcriptional regulator ICP4 | 132515-132544 | 6:03:01 |                  |
| CCCAGCGCCCCCCCCAAAACCCCCACATCC              |        |        |        |                                            |               |         |                  |
| 132601                                      | 132629 | 130818 | 135014 | CDS product transcriptional regulator ICP4 | 132601-132629 | 6:03:01 |                  |
| GGCGGGGGGACGACCAGGGGAACGGGGG                |        |        |        |                                            |               |         |                  |

|                                               |        |        |        |                                            |               |         |                  |
|-----------------------------------------------|--------|--------|--------|--------------------------------------------|---------------|---------|------------------|
| 132632                                        | 132652 | 130818 | 135014 | CDS product transcriptional regulator ICP4 | 132632-132652 | 4:01:01 |                  |
| CCCACCCAGATACCAACTCCC                         |        |        |        |                                            |               |         |                  |
| 132796                                        | 132834 | 130818 | 135014 | CDS product transcriptional regulator ICP4 | 132796-132834 | 6:03:01 |                  |
| CCCCTCGGTGGCCAAGTACCCCTCGCCGGTCTGCCCCC        |        |        |        |                                            |               |         |                  |
| 132999                                        | 133016 | 130818 | 135014 | CDS product transcriptional regulator ICP4 | 132999-133016 | 4:01:01 |                  |
| CCAGGACCCTGGCCCCC                             |        |        |        |                                            |               |         |                  |
| 133114                                        | 133128 | 130818 | 135014 | CDS product transcriptional regulator ICP4 | 133114-133128 | 4:01:01 | GGAGGAGGTCGCCG   |
| 133125                                        | 133165 | 130818 | 135014 | CDS product transcriptional regulator ICP4 | 133125-133165 | 9:06:02 |                  |
| CCGGTACCCCGACCCCATACTCCACCCCGGGCGACC          |        |        |        |                                            |               |         |                  |
| 133184                                        | 133202 | 130818 | 135014 | CDS product transcriptional regulator ICP4 | 133184-133202 | 5:02:01 |                  |
| GGGGGAGTCACGGTGGAGG                           |        |        |        |                                            |               |         |                  |
| 133310                                        | 133342 | 130818 | 135014 | CDS product transcriptional regulator ICP4 | 133310-133342 | 7:04:01 |                  |
| CCCCTTTCACCCACCTCACCGCCCCAATCC                |        |        |        |                                            |               |         |                  |
| 133370                                        | 133414 | 130818 | 135014 | CDS product transcriptional regulator ICP4 | 133370-133414 | 7:04:01 |                  |
| CCGCTTCCCCGGGGCCACGCATCCGGCAACCTCCCCATCGATGCC |        |        |        |                                            |               |         |                  |
| 133457                                        | 133468 | 130818 | 135014 | CDS product transcriptional regulator ICP4 | 133457-133468 | 4:01:01 | CCACCACCCACC     |
| 133484                                        | 133512 | 130818 | 135014 | CDS product transcriptional regulator ICP4 | 133484-133512 | 5:02:01 |                  |
| CCCCCTAGGGGTCCCCTTGACCCATGCC                  |        |        |        |                                            |               |         |                  |
| 133572                                        | 133585 | 130818 | 135014 | CDS product transcriptional regulator ICP4 | 133572-133585 | 4:01:01 | CCCCCAGACCCACC   |
| 133731                                        | 133763 | 130818 | 135014 | CDS product transcriptional regulator ICP4 | 133731-133763 | 8:05:02 |                  |
| GGCAGGAGGGTACAGGTCTCGGGGGCTGGTGG              |        |        |        |                                            |               |         |                  |
| 133960                                        | 133975 | 130818 | 135014 | CDS product transcriptional regulator ICP4 | 133960-133975 | 5:02:01 | CCGCCTCCTCTCCCCC |
| 133989                                        | 134015 | 130818 | 135014 | CDS product transcriptional regulator ICP4 | 133989-134015 | 5:02:01 |                  |

|                                                      |        |        |        |                                            |               |         |
|------------------------------------------------------|--------|--------|--------|--------------------------------------------|---------------|---------|
| GGGCAGGGAATTGGAGTGGTCCCCCGG                          |        |        |        |                                            |               |         |
| 134160                                               | 134177 | 130818 | 135014 | CDS product transcriptional regulator ICP4 | 134160-134177 | 4:01:01 |
| GGCCGGCGACGGGCCCGG                                   |        |        |        |                                            |               |         |
| 134173                                               | 134224 | 130818 | 135014 | CDS product transcriptional regulator ICP4 | 134173-134224 | 9:06:02 |
| CCCGGCCGTGAGCCATTACCACCTATACATCCGCGCCACGGTCACCCCGACC |        |        |        |                                            |               |         |
| 134236                                               | 134258 | 130818 | 135014 | CDS product transcriptional regulator ICP4 | 134236-134258 | 4:01:01 |
| GGTGCGCTGGCCGGCCCTAGAGG                              |        |        |        |                                            |               |         |
| 134246                                               | 134266 | 130818 | 135014 | CDS product transcriptional regulator ICP4 | 134246-134266 | 4:01:01 |
| CCGGCCCTAGAGGACCTCTCC                                |        |        |        |                                            |               |         |
| 134416                                               | 134441 | 130818 | 135014 | CDS product transcriptional regulator ICP4 | 134416-134441 | 4:01:01 |
| CCGCACACCCGTTCCCATGTTACCCC                           |        |        |        |                                            |               |         |
| 134477                                               | 134495 | 130818 | 135014 | CDS product transcriptional regulator ICP4 | 134477-134495 | 4:01:01 |
| GGGTGTAAGGATATGGAGG                                  |        |        |        |                                            |               |         |
| 134544                                               | 134563 | 130818 | 135014 | CDS product transcriptional regulator ICP4 | 134544-134563 | 4:01:01 |
| CCGCCCACAGCCATCGTGCC                                 |        |        |        |                                            |               |         |
| 134778                                               | 134801 | 130818 | 135014 | CDS product transcriptional regulator ICP4 | 134778-134801 | 4:01:01 |
| GGGACTCGGGATTTGGAAAACAGG                             |        |        |        |                                            |               |         |
| 134968                                               | 134986 | 130818 | 135014 | CDS product transcriptional regulator ICP4 | 134968-134986 | 4:01:01 |
| GGACGCGGAGAGTGGATGG                                  |        |        |        |                                            |               |         |

gi|386522723|ref|NC\_017826.1| Equid herpesvirus 8, complete genome

|     |     |     |      |                                   |         |         |                                       |
|-----|-----|-----|------|-----------------------------------|---------|---------|---------------------------------------|
| 450 | 487 | 420 | 1028 | CDS product membrane protein UL56 | 450-487 | 8:05:02 | CCTCCTCGGTTTCCATTTCATGTGTCCACCACCGCCC |
| 680 | 693 | 420 | 1028 | CDS product membrane protein UL56 | 680-693 | 4:01:01 | CCATCCAGGCCGCC                        |

|                                      |      |      |      |                                                  |           |           |                           |
|--------------------------------------|------|------|------|--------------------------------------------------|-----------|-----------|---------------------------|
| 1332                                 | 1356 | 1069 | 1683 | CDS product membrane protein V1                  | 1332-1356 | 4:01:01   | GGCATCGGTACAGCGGTCTGTGGGG |
| 1369                                 | 1383 | 1069 | 1683 | CDS product membrane protein V1                  | 1369-1383 | 4:01:01   | GGTGGTGAGGCGGGG           |
| 1518                                 | 1536 | 1069 | 1683 | CDS product membrane protein V1                  | 1518-1536 | 4:01:01   | GGTGGAGGGGCGCGCTGG        |
| 2237                                 | 2263 | 1960 | 2733 | CDS product myristylated tegument protein CIRC   |           | 2237-2263 | 5:02:01                   |
| GGTCTTTGGCTACGAGGATGGTACCGG          |      |      |      |                                                  |           |           |                           |
| 2456                                 | 2491 | 1960 | 2733 | CDS product myristylated tegument protein CIRC   |           | 2456-2491 | 6:03:01                   |
| CCTACTGGGCCAGACCAAGAGCTCCACGCACCGTCC |      |      |      |                                                  |           |           |                           |
| 2557                                 | 2575 | 1960 | 2733 | CDS product myristylated tegument protein CIRC   |           | 2557-2575 | 4:01:01                   |
| GGCTAAGAGGCAAGGGAGG                  |      |      |      |                                                  |           |           |                           |
| 3176                                 | 3192 | 2766 | 3368 | CDS product nuclear protein UL55                 | 3176-3192 | 4:01:01   | GGCTGGCTGGGATGTGG         |
| 3795                                 | 3810 | 3588 | 5000 | CDS product multifunctional expression regulator |           | 3795-3810 | 4:01:01                   |
| CCGCTCCCAACCGCCC                     |      |      |      |                                                  |           |           |                           |
| 4515                                 | 4531 | 3588 | 5000 | CDS product multifunctional expression regulator |           | 4515-4531 | 4:01:01                   |
| CCTGCGCCGCCATGTCC                    |      |      |      |                                                  |           |           |                           |
| 4595                                 | 4628 | 3588 | 5000 | CDS product multifunctional expression regulator |           | 4595-4628 | 5:02:01                   |
| CCGCTTTGGCCAGCTCCGCGCTGCCTGGTGCGCC   |      |      |      |                                                  |           |           |                           |
| 4717                                 | 4734 | 3588 | 5000 | CDS product multifunctional expression regulator |           | 4717-4734 | 4:01:01                   |
| CCTGGCCAAACCCCGGCC                   |      |      |      |                                                  |           |           |                           |
| 6798                                 | 6824 | 6180 | 9422 | CDS product helicase-primase primase subunit     |           | 6798-6824 | 5:02:01                   |
| CCTCCGTAAACCTCGCCAGAGTCGCCC          |      |      |      |                                                  |           |           |                           |
| 6839                                 | 6857 | 6180 | 9422 | CDS product helicase-primase primase subunit     |           | 6839-6857 | 4:01:01                   |
| GGGAAGGCGAAGGCTGCGG                  |      |      |      |                                                  |           |           |                           |
| 6994                                 | 7015 | 6180 | 9422 | CDS product helicase-primase primase subunit     |           | 6994-7015 | 6:03:01                   |

|                                    |       |       |       |                                              |             |                                    |
|------------------------------------|-------|-------|-------|----------------------------------------------|-------------|------------------------------------|
| GGAGGTAAGGGGTGGCACTGG              |       |       |       |                                              |             |                                    |
| 7744                               | 7761  | 6180  | 9422  | CDS product helicase-primase primase subunit | 7744-7761   | 4:01:01                            |
| GGCGCTTGGAAGGCAGGG                 |       |       |       |                                              |             |                                    |
| 7935                               | 7969  | 6180  | 9422  | CDS product helicase-primase primase subunit | 7935-7969   | 5:02:01                            |
| GGTGACGAGGAATGGACACCCTGGGGTTTGTGGG |       |       |       |                                              |             |                                    |
| 7988                               | 8003  | 6180  | 9422  | CDS product helicase-primase primase subunit | 7988-8003   | 4:01:01 CCAACCGCGGCCCGCC           |
| 8573                               | 8590  | 6180  | 9422  | CDS product helicase-primase primase subunit | 8573-8590   | 4:01:01                            |
| GGGATTTGGTGCGGCCGG                 |       |       |       |                                              |             |                                    |
| 8810                               | 8832  | 6180  | 9422  | CDS product helicase-primase primase subunit | 8810-8832   | 5:02:01                            |
| GGAGGTAAACCGGAGCGGCCGG             |       |       |       |                                              |             |                                    |
| 8885                               | 8898  | 6180  | 9422  | CDS product helicase-primase primase subunit | 8885-8898   | 4:01:01 GGCAGCGGCGGCGG             |
| 9043                               | 9063  | 6180  | 9422  | CDS product helicase-primase primase subunit | 9043-9063   | 4:01:01                            |
| CCAACGCCCGGGCTCCCGTCC              |       |       |       |                                              |             |                                    |
| 9123                               | 9136  | 6180  | 9422  | CDS product helicase-primase primase subunit | 9123-9136   | 4:01:01 CCTCCCACCATACC             |
| 9221                               | 9239  | 6180  | 9422  | CDS product helicase-primase primase subunit | 9221-9239   | 4:01:01                            |
| CCAACCGTCACCAGTGTCC                |       |       |       |                                              |             |                                    |
| 9506                               | 9525  | 9421  | 10158 | CDS product tegument protein UL51            | 9506-9525   | 4:01:01 CCCATCTACCATGCTCCGCC       |
| 9697                               | 9719  | 9421  | 10158 | CDS product tegument protein UL51            | 9697-9719   | 4:01:01 CCGACAACCCAAACCTAAACGCC    |
| 10040                              | 10053 | 9421  | 10158 | CDS product tegument protein UL51            | 10040-10053 | 4:01:01 CCCTCTCTCCCCC              |
| 11992                              | 12003 | 11676 | 12593 | CDS product tegument protein VP22            | 11992-12003 | 4:01:01 GGTTGGTGGTGG               |
| 12473                              | 12498 | 11676 | 12593 | CDS product tegument protein VP22            | 12473-12498 | 4:01:01 GGATATGCGGCAGCTGGGCACAACGG |
| 20103                              | 20132 | 19564 | 20247 | CDS product membrane protein UL45            | 20103-20132 | 7:04:01                            |
| GGTGGGTGTAGGGGAGTTGGCAACGGGGG      |       |       |       |                                              |             |                                    |

|                            |       |       |       |                                                 |                                              |
|----------------------------|-------|-------|-------|-------------------------------------------------|----------------------------------------------|
| 23784                      | 23799 | 23577 | 24797 | CDS product DNA polymerase processivity subunit | 23784-23799 4:01:01 GGCTGGGTCGGGTAGG         |
| 48100                      | 48115 | 47924 | 49789 | CDS product DNA packaging protein UL32          | 48100-48115 4:01:01 CCCACGCCACGCCCC          |
| 48322                      | 48339 | 47924 | 49789 | CDS product DNA packaging protein UL32          | 48322-48339 4:01:01 CCACCATGTGCCGTGGCC       |
| 48550                      | 48565 | 47924 | 49789 | CDS product DNA packaging protein UL32          | 48550-48565 4:01:01 GGACCCGGTATGGCGG         |
| 48672                      | 48695 | 47924 | 49789 | CDS product DNA packaging protein UL32          | 48672-48695 4:01:01 GGCTGGGCTACACGGTAGACATGG |
| 48708                      | 48734 | 47924 | 49789 | CDS product DNA packaging protein UL32          | 48708-48734 6:03:01                          |
| GGCAGATGGGGCGGTGGAGTGTTTGG |       |       |       |                                                 |                                              |
| 49149                      | 49168 | 47924 | 49789 | CDS product DNA packaging protein UL32          | 49149-49168 4:01:01 GGACACGGCCACTGGGCCGG     |
| 49393                      | 49407 | 47924 | 49789 | CDS product DNA packaging protein UL32          | 49393-49407 5:02:01 GGGGGTGGCGGTGGG          |
| 49543                      | 49565 | 47924 | 49789 | CDS product DNA packaging protein UL32          | 49543-49565 5:02:01 CCCATAGGCCCCCTCCAGAACC   |
| 50814                      | 50837 | 50686 | 54348 | CDS product DNA polymerase catalytic subunit    | 50814-50837 5:02:01                          |
| GGGGTCTTGTGGGGGTTTCCGG     |       |       |       |                                                 |                                              |
| 50977                      | 50995 | 50686 | 54348 | CDS product DNA polymerase catalytic subunit    | 50977-50995 4:01:01                          |
| GGGTCTTCGGCGAGGTCGG        |       |       |       |                                                 |                                              |
| 51036                      | 51055 | 50686 | 54348 | CDS product DNA polymerase catalytic subunit    | 51036-51055 4:01:01                          |
| GGTGGCCACGGGTTTGGGG        |       |       |       |                                                 |                                              |
| 51186                      | 51201 | 50686 | 54348 | CDS product DNA polymerase catalytic subunit    | 51186-51201 4:01:01 GGTGAGGTGTGGCAGG         |
| 51377                      | 51396 | 50686 | 54348 | CDS product DNA polymerase catalytic subunit    | 51377-51396 4:01:01                          |
| CCTCTGCGGCCGCCGTGGCC       |       |       |       |                                                 |                                              |
| 51628                      | 51645 | 50686 | 54348 | CDS product DNA polymerase catalytic subunit    | 51628-51645 4:01:01                          |
| CCCAGCTCCGATACCCCC         |       |       |       |                                                 |                                              |
| 51708                      | 51729 | 50686 | 54348 | CDS product DNA polymerase catalytic subunit    | 51708-51729 4:01:01                          |
| GGAGTAAGGCTTGTGGTTTTGG     |       |       |       |                                                 |                                              |

|                                                                       |       |       |       |                                               |                                     |
|-----------------------------------------------------------------------|-------|-------|-------|-----------------------------------------------|-------------------------------------|
| 51868                                                                 | 51890 | 50686 | 54348 | CDS product DNA polymerase catalytic subunit  | 51868-51890 5:02:01                 |
| CCGTTTGCCACCCCGTGAATCC                                                |       |       |       |                                               |                                     |
| 52244                                                                 | 52314 | 50686 | 54348 | CDS product DNA polymerase catalytic subunit  | 52244-52314 12:09:03                |
| CCTTTGCTCCCTGATAGCCCACGGCCCTTCCGGCGCCGGGCTTCCGCCTCCATTTCCGAAGCCATGACC |       |       |       |                                               |                                     |
| 52639                                                                 | 52667 | 50686 | 54348 | CDS product DNA polymerase catalytic subunit  | 52639-52667 5:02:01                 |
| CCTATTACGCCCCGCCGGTCGGGCCCCGCC                                        |       |       |       |                                               |                                     |
| 53178                                                                 | 53205 | 50686 | 54348 | CDS product DNA polymerase catalytic subunit  | 53178-53205 4:01:01                 |
| GGAGATCTGGATGACCAGGTCCTCTTGG                                          |       |       |       |                                               |                                     |
| 53301                                                                 | 53324 | 50686 | 54348 | CDS product DNA polymerase catalytic subunit  | 53301-53324 4:01:01                 |
| GGGGATCGGCTCTAGGTTATCTGG                                              |       |       |       |                                               |                                     |
| 53396                                                                 | 53415 | 50686 | 54348 | CDS product DNA polymerase catalytic subunit  | 53396-53415 4:01:01                 |
| GGGTGCCTGGCCGCAGGCGG                                                  |       |       |       |                                               |                                     |
| 53531                                                                 | 53545 | 50686 | 54348 | CDS product DNA polymerase catalytic subunit  | 53531-53545 4:01:01 GGCGGCTGCTGGAGG |
| 53644                                                                 | 53672 | 50686 | 54348 | CDS product DNA polymerase catalytic subunit  | 53644-53672 8:05:02                 |
| CCGCCCCACCATCCCCGCCACTGCCGCC                                          |       |       |       |                                               |                                     |
| 53683                                                                 | 53706 | 50686 | 54348 | CDS product DNA polymerase catalytic subunit  | 53683-53706 5:02:01                 |
| CCGCCGTTGCCATTTCCCAGGGCC                                              |       |       |       |                                               |                                     |
| 53995                                                                 | 54028 | 50686 | 54348 | CDS product DNA polymerase catalytic subunit  | 53995-54028 6:03:01                 |
| CCATAGCCCCGAAAATCCTGGCCGTTCCAAACCC                                    |       |       |       |                                               |                                     |
| 54143                                                                 | 54154 | 50686 | 54348 | CDS product DNA polymerase catalytic subunit  | 54143-54154 4:01:01 GGTAGGCGGGGG    |
| 54221                                                                 | 54250 | 50686 | 54348 | CDS product DNA polymerase catalytic subunit  | 54221-54250 5:02:01                 |
| GGGGGGGCTGGGGCGCTCGGTCTCTGCGG                                         |       |       |       |                                               |                                     |
| 58873                                                                 | 58910 | 58386 | 60713 | CDS product DNA packaging terminase subunit 2 | 58873-58910 6:03:01                 |



|                                        |       |       |       |                                               |                                                  |
|----------------------------------------|-------|-------|-------|-----------------------------------------------|--------------------------------------------------|
| GGGGTTCGAGGCCGGCCTCGAGGCCTTGGACAGCGTGG |       |       |       |                                               |                                                  |
| 58933                                  | 58958 | 58386 | 60713 | CDS product DNA packaging terminase subunit 2 | 58933-58958 4:01:01                              |
| GGGCAGCGGCATTGTGGTACCCCCGG             |       |       |       |                                               |                                                  |
| 58969                                  | 58987 | 58386 | 60713 | CDS product DNA packaging terminase subunit 2 | 58969-58987 4:01:01                              |
| CCCCACCCATCCCTGCTCC                    |       |       |       |                                               |                                                  |
| 59170                                  | 59194 | 58386 | 60713 | CDS product DNA packaging terminase subunit 2 | 59170-59194 4:01:01                              |
| GGCTCTCCGGGCCCTCGAGGCAAGG              |       |       |       |                                               |                                                  |
| 60989                                  | 61014 | 60872 | 63514 | CDS product envelope glycoprotein B           | 60989-61014 7:04:01 CCTGCCCACCGCTACCGGATCCACC    |
| 61369                                  | 61395 | 60872 | 63514 | CDS product envelope glycoprotein B           | 61369-61395 5:02:01 CCAGGGGCCAGAGCCTGGCAGACCACC  |
| 61416                                  | 61434 | 60872 | 63514 | CDS product envelope glycoprotein B           | 61416-61434 4:01:01 GGGGTGGATGCCATGGAGG          |
| 61470                                  | 61485 | 60872 | 63514 | CDS product envelope glycoprotein B           | 61470-61485 5:02:01 GGAGGTGGAGGCGCGG             |
| 61505                                  | 61521 | 60872 | 63514 | CDS product envelope glycoprotein B           | 61505-61521 4:01:01 CCTTCGCCCTGTCCACC            |
| 62060                                  | 62077 | 60872 | 63514 | CDS product envelope glycoprotein B           | 62060-62077 4:01:01 CCAACCGCACCTACGACC           |
| 62144                                  | 62167 | 60872 | 63514 | CDS product envelope glycoprotein B           | 62144-62167 5:02:01 CCATACCAGAACCTCAGCCAACCC     |
| 62220                                  | 62234 | 60872 | 63514 | CDS product envelope glycoprotein B           | 62220-62234 4:01:01 GGAGGCAACGGAAGG              |
| 63015                                  | 63044 | 60872 | 63514 | CDS product envelope glycoprotein B           | 63015-63044 5:02:01                              |
| GGGCCTGGGTAAAGTGGGGGAAGCAGTGGG         |       |       |       |                                               |                                                  |
| 63354                                  | 63376 | 60872 | 63514 | CDS product envelope glycoprotein B           | 63354-63376 4:01:01 GGTTCGGCCCTGAAAAAGCAGG       |
| 69088                                  | 69105 | 69044 | 70102 | CDS product thymidine kinase                  | 69088-69105 4:01:01 GGGGCGCCGCCAGGCGG            |
| 69359                                  | 69379 | 69044 | 70102 | CDS product thymidine kinase                  | 69359-69379 6:03:01 CCACCCCTACCTTATCCTCC         |
| 69428                                  | 69444 | 69044 | 70102 | CDS product thymidine kinase                  | 69428-69444 4:01:01 CCAGACCAGACCTAACCC           |
| 69456                                  | 69477 | 69044 | 70102 | CDS product thymidine kinase                  | 69456-69477 5:02:01 CCGCCACCCGGTCGCCTCTGCC       |
| 69536                                  | 69563 | 69044 | 70102 | CDS product thymidine kinase                  | 69536-69563 5:02:01 CCATGGTCGCCACCCTACCCAGGGAACC |

|                                    |       |       |       |                                                      |                                                  |
|------------------------------------|-------|-------|-------|------------------------------------------------------|--------------------------------------------------|
| 69724                              | 69751 | 69044 | 70102 | CDS product thymidine kinase                         | 69724-69751 5:02:01 GGGAGAGTCTGGCGCGACGGCTGGGGGG |
| 70616                              | 70633 | 70329 | 72884 | CDS product envelope glycoprotein H                  | 70616-70633 4:01:01 CCTCCGCAACACCAACCC           |
| 70649                              | 70674 | 70329 | 72884 | CDS product envelope glycoprotein H                  | 70649-70674 4:01:01 CCAGAACCTGGGGACCCACGTGGACC   |
| 70892                              | 70905 | 70329 | 72884 | CDS product envelope glycoprotein H                  | 70892-70905 4:01:01 GGTGAGGAAGGCGG               |
| 71286                              | 71303 | 70329 | 72884 | CDS product envelope glycoprotein H                  | 71286-71303 4:01:01 GGATTTCCCGGGAGGTGG           |
| 71527                              | 71546 | 70329 | 72884 | CDS product envelope glycoprotein H                  | 71527-71546 5:02:01 CCTCCGCCTTATTGTCCCCC         |
| 72639                              | 72658 | 70329 | 72884 | CDS product envelope glycoprotein H                  | 72639-72658 4:01:01 CCATCCCGCCTTTAATCCC          |
| 87321                              | 87351 | 86725 | 87795 | CDS product hypothetical protein                     | 87321-87351 5:02:01                              |
| GGCTACTTGGTGAAAGGCGTCTGAGGAGCGG    |       |       |       |                                                      |                                                  |
| 87471                              | 87489 | 86725 | 87795 | CDS product hypothetical protein                     | 87471-87489 4:01:01 GGCATCCACGGAGGAGGGG          |
| 87610                              | 87641 | 86725 | 87795 | CDS product hypothetical protein                     | 87610-87641 6:03:01                              |
| GGAACAACGGTCTGGTGGCGCTGGGGAGTAGG   |       |       |       |                                                      |                                                  |
| 87770                              | 87788 | 86725 | 87795 | CDS product hypothetical protein                     | 87770-87788 4:01:01 CCCTGCCCAGCACCTACC           |
| 87834                              | 87855 | 87824 | 88777 | CDS product tegument protein UL14                    | 87834-87855 4:01:01 GGCAAGGTCTAGGCGCCAAAGG       |
| 88084                              | 88110 | 87824 | 88777 | CDS product tegument protein UL14                    | 88084-88110 4:01:01 GGGGAGATACTGGACAGGCATCGCAGG  |
| 88213                              | 88232 | 87824 | 88777 | CDS product tegument protein UL14                    | 88213-88232 6:03:01 GGAGGCGGTGGTGAGGTCCG         |
| 88329                              | 88361 | 87824 | 88777 | CDS product tegument protein UL14                    | 88329-88361 4:01:01                              |
| CCCTCATTCTCCCCGCTCAACCTGTCTCGCCCC  |       |       |       |                                                      |                                                  |
| 88650                              | 88682 | 87824 | 88777 | CDS product tegument protein UL14                    | 88650-88682 7:04:01                              |
| GGTCGGCCCCGGTCGATCAGGAATGGCTGGGTGG |       |       |       |                                                      |                                                  |
| 88929                              | 88953 | 88246 | 90030 | CDS product tegument serine/threonine protein kinase | 88929-88953 5:02:01                              |
| GGAGGCGCCGGTAGCTACGGGGAGG          |       |       |       |                                                      |                                                  |
| 89760                              | 89782 | 88246 | 90030 | CDS product tegument serine/threonine protein kinase | 89760-89782 5:02:01                              |

|                                           |       |       |       |                                                      |                                               |
|-------------------------------------------|-------|-------|-------|------------------------------------------------------|-----------------------------------------------|
| CCTGCCCTATTTCTACCACCCC                    |       |       |       |                                                      |                                               |
| 89928                                     | 89942 | 88246 | 90030 | CDS product tegument serine/threonine protein kinase | 89928-89942 4:01:01                           |
| CCTTCCGCCTTTACC                           |       |       |       |                                                      |                                               |
| 91999                                     | 92015 | 91995 | 93347 | CDS product envelope glycoprotein M                  | 91999-92015 4:01:01 GGTACTCTCGGTGGTGG         |
| 92327                                     | 92343 | 91995 | 93347 | CDS product envelope glycoprotein M                  | 92327-92343 4:01:01 GGCTTTGGACGCGGTGG         |
| 92398                                     | 92418 | 91995 | 93347 | CDS product envelope glycoprotein M                  | 92398-92418 4:01:01 GGGTGGCTACGGCCAGCGTGG     |
| 92526                                     | 92550 | 91995 | 93347 | CDS product envelope glycoprotein M                  | 92526-92550 4:01:01 CCCACGGCAACCGTCACCGTTTGCC |
| 92650                                     | 92669 | 91995 | 93347 | CDS product envelope glycoprotein M                  | 92650-92669 4:01:01 CCGCGCGTCCGGGTCCGGCC      |
| 92800                                     | 92816 | 91995 | 93347 | CDS product envelope glycoprotein M                  | 92800-92816 4:01:01 CCGCCCCAAAAGTACC          |
| 96178                                     | 96213 | 95940 | 98195 | CDS product helicase-primase subunit                 | 96178-96213 5:02:01                           |
| GGCTGTGCCGGGGTGTGGCCCCCTGGCTCCCCCTGGG     |       |       |       |                                                      |                                               |
| 96242                                     | 96257 | 95940 | 98195 | CDS product helicase-primase subunit                 | 96242-96257 4:01:01 GGTGGCATAACGGCGG          |
| 96339                                     | 96352 | 95940 | 98195 | CDS product helicase-primase subunit                 | 96339-96352 4:01:01 CCCTCCGACCCGCC            |
| 96361                                     | 96378 | 95940 | 98195 | CDS product helicase-primase subunit                 | 96361-96378 6:03:01 GGATGGAGGCGGTGGCGG        |
| 96415                                     | 96441 | 95940 | 98195 | CDS product helicase-primase subunit                 | 96415-96441 5:02:01                           |
| GGTGGAGGTAGACTTGACCCAGCGGG                |       |       |       |                                                      |                                               |
| 96983                                     | 97002 | 95940 | 98195 | CDS product helicase-primase subunit                 | 96983-97002 4:01:01 GGGCTGTGGCCGGCTCTAGG      |
| 97024                                     | 97064 | 95940 | 98195 | CDS product helicase-primase subunit                 | 97024-97064 7:04:01                           |
| GGCTCCATGGGAACCGGAAGATAGGTGGCCCGGTGAATCGG |       |       |       |                                                      |                                               |
| 97074                                     | 97096 | 95940 | 98195 | CDS product helicase-primase subunit                 | 97074-97096 4:01:01 GGGTAGATGGGGTGGCACACAGG   |
| 97114                                     | 97136 | 95940 | 98195 | CDS product helicase-primase subunit                 | 97114-97136 6:03:01 GGATGGTTGGGGGCGCGAAGGG    |
| 97342                                     | 97375 | 95940 | 98195 | CDS product helicase-primase subunit                 | 97342-97375 5:02:01                           |
| CCCCGTGGCCTATAGGTCCATAATAGCCCTCGCC        |       |       |       |                                                      |                                               |

97448 97467 95940 98195 CDS product helicase-primase subunit  
 97715 97736 95940 98195 CDS product helicase-primase subunit  
 99628 99647 98997 101072 CDS product capsid portal protein  
 99670 99706 98997 101072 CDS product capsid portal protein  
 CCTCGTGCCCTAGTCCTCCTGCGCCGGCCTTGGCGCC  
 99749 99764 98997 101072 CDS product capsid portal protein  
 99829 99860 98997 101072 CDS product capsid portal protein  
 CCAGAAGCCCCTATTCCCGGCCCTCAGGTCC  
 99891 99913 98997 101072 CDS product capsid portal protein  
 100495 100520 98997 101072 CDS product capsid portal protein  
 CCAGTTCCACCACTGCCTCAAGCCCC  
 100626 100647 98997 101072 CDS product capsid portal protein  
 100706 100737 98997 101072 CDS product capsid portal protein  
 GGCAAAGCTGGCGGTGCCGTCTGGGCTCGCTGG  
 104139 104159 103937 104605 CDS product nuclear protein UL4  
 104208 104220 103937 104605 CDS product nuclear protein UL4  
 104414 104433 103937 104605 CDS product nuclear protein UL4  
 104575 104595 103937 104605 CDS product nuclear protein UL4  
 120061 120093 119988 120854 CDS product regulatory protein ICP22  
 CCCCATCATCCCGTCCCTGACCCCTCCCCCCC  
 120103 120122 119988 120854 CDS product regulatory protein ICP22  
 120161 120186 119988 120854 CDS product regulatory protein ICP22  
 GGTGGCTCGGACCATCCGAATACGG

97448-97467 4:01:01 GGCTTTTGGGGGGCAGCTGG  
 97715-97736 4:01:01 GGGGCCGGCAGGGCCGCAAAGG  
 99628-99647 4:01:01 CCACGTAGCCGTCTCTCCC  
 99670-99706 7:04:01  
 99749-99764 4:01:01 CCCGTCGGCCGCCGCC  
 99829-99860 5:02:01  
 99891-99913 4:01:01 CCCTCCAACATTCCGTTTATGCC  
 100495-100520 5:02:01  
 100626-100647 5:02:01 GGGTGGACGGTTGCGCCGGGGG  
 100706-100737 5:02:01  
 104139-104159 4:01:01 GCGGTTGGTGCTGGACTGCGG  
 104208-104220 4:01:01 CCCCCTGACCACC  
 104414-104433 4:01:01 CCGCGTGTTCCACCGCTGCC  
 104575-104595 4:01:01 CCGTGTTTCCCATGCCTTTCC  
 120061-120093 7:04:01  
 120103-120122 4:01:01 CCCGTCCCCACGCTCCAGCC  
 120161-120186 5:02:01

120191 120235 119988 120854 CDS product regulatory protein ICP22  
 CCGCTTTCCCGAGGGCCCTGCGCCCGTACCTGGCCCGGGGGCCC  
 120223 120239 119988 120854 CDS product regulatory protein ICP22  
 120315 120337 119988 120854 CDS product regulatory protein ICP22  
 CCACCTCCTCGATCCACGTGACC  
 120521 120537 119988 120854 CDS product regulatory protein ICP22  
 120592 120614 119988 120854 CDS product regulatory protein ICP22  
 GGAGGAAGACGAGGCCAGCGTGG  
 120744 120790 119988 120854 CDS product regulatory protein ICP22  
 CCGATACGCCCAACAACCACCCTACAACCCGCGCCAGCGCTGCC  
 120799 120816 119988 120854 CDS product regulatory protein ICP22  
 121459 121490 121409 122113 CDS product virion protein US10  
 GGCGAGGAGTCCGGAGCGGGGATGGGGACGGG  
 121590 121603 121409 122113 CDS product virion protein US10  
 121762 121777 121409 122113 CDS product virion protein US10  
 121990 122004 121409 122113 CDS product virion protein US10  
 122016 122054 121409 122113 CDS product virion protein US10  
 CCTGCGCGCCCGTGGCCGCAAGCTCCCGCTCCAGCTTCC  
 122079 122093 121409 122113 CDS product virion protein US10  
 127658 127702 127508 129142 CDS product envelope glycoprotein J  
 CCCCCACCACAACCCACACATCCTCCCCATCTCCAACCTCTACCC  
 127760 127779 127508 129142 CDS product envelope glycoprotein J  
 127793 127808 127508 129142 CDS product envelope glycoprotein J

120191-120235 7:04:01  
 120223-120239 4:01:01 GGCCCGGGGGCCCGGGG  
 120315-120337 5:02:01  
 120521-120537 4:01:01 CCGCCGAGCGACCCTCC  
 120592-120614 4:01:01  
 120744-120790 8:05:02  
 120799-120816 4:01:01 CCGCAGGCGCCAGCCCCC  
 121459-121490 6:03:01  
 121590-121603 4:01:01 GGCGGAGGCCGCGG  
 121762-121777 4:01:01 GGCGGCGCGCCGTGG  
 121990-122004 4:01:01 CCCC GCCACGCCGCC  
 122016-122054 6:03:01  
 122079-122093 4:01:01 GGTGGCTGTGGCCGG  
 127658-127702 9:06:02  
 127760-127779 4:01:01 CCAGCACCACTCTTCTCCC  
 127793-127808 4:01:01 CCACCACAACCACTCC

[illegible]

|                                               |        |        |        |                                      |               |         |                     |
|-----------------------------------------------|--------|--------|--------|--------------------------------------|---------------|---------|---------------------|
| 139250                                        | 139267 | 139214 | 140080 | CDS product regulatory protein ICP22 | 139250-139267 | 4:01:01 | GGGGGCTGGCGCCTGCGG  |
| 139276                                        | 139322 | 139214 | 140080 | CDS product regulatory protein ICP22 | 139276-139322 | 8:05:02 |                     |
| GGCAGCGCTGGCGGGTTGTAGGGTGGTTGTTGGTGGGCGTATCGG |        |        |        |                                      |               |         |                     |
| 139452                                        | 139474 | 139214 | 140080 | CDS product regulatory protein ICP22 | 139452-139474 | 4:01:01 |                     |
| CCACGCTGGCCTCGTCTTCCTCC                       |        |        |        |                                      |               |         |                     |
| 139529                                        | 139545 | 139214 | 140080 | CDS product regulatory protein ICP22 | 139529-139545 | 4:01:01 | GGAGGGTCGCTCGGCGG   |
| 139729                                        | 139751 | 139214 | 140080 | CDS product regulatory protein ICP22 | 139729-139751 | 5:02:01 |                     |
| GGTCACGTGGATCGAGGAGGTGG                       |        |        |        |                                      |               |         |                     |
| 139827                                        | 139843 | 139214 | 140080 | CDS product regulatory protein ICP22 | 139827-139843 | 4:01:01 | CCCCGGGCCCCGGGCC    |
| 139831                                        | 139875 | 139214 | 140080 | CDS product regulatory protein ICP22 | 139831-139875 | 7:04:01 |                     |
| GGGCCCCGGGCCAGGTACGGGCGAGGGCCCTCGGGAAAGCGG    |        |        |        |                                      |               |         |                     |
| 139880                                        | 139905 | 139214 | 140080 | CDS product regulatory protein ICP22 | 139880-139905 | 5:02:01 |                     |
| CCGTATTCCGGATGGTCCGAGCCACC                    |        |        |        |                                      |               |         |                     |
| 139944                                        | 139963 | 139214 | 140080 | CDS product regulatory protein ICP22 | 139944-139963 | 4:01:01 | GGCTGGAGCGTGGGACGGG |
| 139973                                        | 140005 | 139214 | 140080 | CDS product regulatory protein ICP22 | 139973-140005 | 7:04:01 |                     |
| GGGGGGGAGGGGTCAGGGACGGGATGATGGGG              |        |        |        |                                      |               |         |                     |

gi|675510705|ref|NC\_024771.1| Equid herpesvirus 3 strain AR/2007/C3A, complete genome

|     |     |     |     |                                   |         |         |                                    |
|-----|-----|-----|-----|-----------------------------------|---------|---------|------------------------------------|
| 190 | 221 | 146 | 766 | CDS product membrane protein UL56 | 190-221 | 7:04:01 | CCTCGCCGCGCTTCCTTCTCCGCCGCCATGCC   |
| 230 | 264 | 146 | 766 | CDS product membrane protein UL56 | 230-264 | 8:05:02 | CCGCCACGCGCGCCAGCCTCTCCGCAGGCCCGCC |
| 302 | 318 | 146 | 766 | CDS product membrane protein UL56 | 302-318 | 4:01:01 | CCTCCGGCCCTCTGGCC                  |
| 387 | 408 | 146 | 766 | CDS product membrane protein UL56 | 387-408 | 6:03:01 | CCTGCCCTCCAGACCCCGTCC              |

|                                                                    |                                                              |
|--------------------------------------------------------------------|--------------------------------------------------------------|
| 429 456 146 766 CDS product membrane protein UL56                  | 429-456 5:02:01 GGCCGTCCTGGAGCGCGCGTGGAGCGG                  |
| 477 531 146 766 CDS product membrane protein UL56                  | 477-531 12:09:03                                             |
| CCTCCGCGTTCCGCCGCCATCCTACCTAGAGGCCATGCGCCTGGCGCCCCCGGCC            |                                                              |
| 519 541 146 766 CDS product membrane protein UL56                  | 519-541 4:01:01 GGCGCCCCCGGCCTACGAGGTGG                      |
| 594 612 146 766 CDS product membrane protein UL56                  | 594-612 4:01:01 CCCCAACCCCTACACCACC                          |
| 644 660 146 766 CDS product membrane protein UL56                  | 644-660 4:01:01 CCGGCTACCCCCACCCC                            |
| 707 751 146 766 CDS product membrane protein UL56                  | 707-751 6:03:01 CCCTCGTTATCCTTTGTCCATTACCCTCAACCCCTGGGTCACCC |
| 923 935 808 1500 CDS product membrane protein V1                   | 923-935 4:01:01 CCCCCGCCCCGCC                                |
| 944 958 808 1500 CDS product membrane protein V1                   | 944-958 4:01:01 GGACGGGGCGGGGGG                              |
| 1049 1072 808 1500 CDS product membrane protein V1                 | 1049-1072 5:02:01 GGGGGAGCACGGCGGGGCTCCCGG                   |
| 1068 1083 808 1500 CDS product membrane protein V1                 | 1068-1083 4:01:01 CCCGGCCTCCACGCC                            |
| 1099 1116 808 1500 CDS product membrane protein V1                 | 1099-1116 4:01:01 CCCGCTGCCCCGAGGCC                          |
| 1191 1209 808 1500 CDS product membrane protein V1                 | 1191-1209 4:01:01 GGGGCTGGTTCTGGCGGGG                        |
| 1218 1234 808 1500 CDS product membrane protein V1                 | 1218-1234 4:01:01 GGCCGACGGGGGAAGG                           |
| 1235 1277 808 1500 CDS product membrane protein V1                 | 1235-1277 8:05:02                                            |
| CCGTTCCGCCCTCGTACCACACGCTCCGCGACCTCGCACCCCC                        |                                                              |
| 1301 1326 808 1500 CDS product membrane protein V1                 | 1301-1326 6:03:01 CCATTCTCCAATTGCCGAACCGCC                   |
| 1342 1365 808 1500 CDS product membrane protein V1                 | 1342-1365 4:01:01 GGGCGCTGGCTCTGGGGCCGCGG                    |
| 1434 1491 808 1500 CDS product membrane protein V1                 | 1434-1491 11:08:02                                           |
| GGGCTCGGGTGGGAGGGGTTTGGGAGGAGAGGTGCGAGCGGCACACCGCCCCGGGCGG         |                                                              |
| 1665 1711 1656 2435 CDS product myristylated tegument protein CIRC | 1665-1711 8:05:02                                            |
| CCGGCTCCAGCCCCGAGAAGCCAGCTCCCGCCCTCGAGGCCTTGCC                     |                                                              |
| 1765 1783 1656 2435 CDS product myristylated tegument protein CIRC | 1765-1783 4:01:01                                            |



|                               |      |      |      |                                                  |           |           |                         |                |  |
|-------------------------------|------|------|------|--------------------------------------------------|-----------|-----------|-------------------------|----------------|--|
| GGGGGGCGACGAGGCGCGG           |      |      |      |                                                  |           |           |                         |                |  |
| 1932                          | 1959 | 1656 | 2435 | CDS product myristylated tegument protein CIRC   |           | 1932-1959 | 5:02:01                 |                |  |
| GGGTGTTTCGGGTACGAGGAGGGCACTGG |      |      |      |                                                  |           |           |                         |                |  |
| 2170                          | 2196 | 1656 | 2435 | CDS product myristylated tegument protein CIRC   |           | 2170-2196 | 6:03:01                 |                |  |
| CCACTCTCCCGCCCAATGCCGCCGCC    |      |      |      |                                                  |           |           |                         |                |  |
| 2278                          | 2294 | 1656 | 2435 | CDS product myristylated tegument protein CIRC   |           | 2278-2294 | 4:01:01                 |                |  |
| CCTTCGCCCCGCCACC              |      |      |      |                                                  |           |           |                         |                |  |
| 2370                          | 2383 | 1656 | 2435 | CDS product myristylated tegument protein CIRC   |           | 2370-2383 | 4:01:01                 | CCCCCTCCGAGCCC |  |
| 2394                          | 2422 | 1656 | 2435 | CDS product myristylated tegument protein CIRC   |           | 2394-2422 | 6:03:01                 |                |  |
| CCCGCGCCCCGGCTCCTCCGTTTCTTC   |      |      |      |                                                  |           |           |                         |                |  |
| 2693                          | 2715 | 2472 | 3059 | CDS product nuclear protein UL55                 | 2693-2715 | 4:01:01   | GGGGAGGTCTTGCAGGATCCGGG |                |  |
| 2883                          | 2898 | 2472 | 3059 | CDS product nuclear protein UL55                 | 2883-2898 | 4:01:01   | GGCTGGCTGGTAGTGG        |                |  |
| 3609                          | 3632 | 3283 | 4662 | CDS product multifunctional expression regulator |           | 3609-3632 | 5:02:01                 |                |  |
| GGCCAGGTGGCACCGCAGGAAGGG      |      |      |      |                                                  |           |           |                         |                |  |
| 3752                          | 3768 | 3283 | 4662 | CDS product multifunctional expression regulator |           | 3752-3768 | 4:01:01                 |                |  |
| CCGAGGCCAGCGCCTCC             |      |      |      |                                                  |           |           |                         |                |  |
| 3797                          | 3816 | 3283 | 4662 | CDS product multifunctional expression regulator |           | 3797-3816 | 4:01:01                 |                |  |
| CCCGGAGGGCCCGCGCCGCC          |      |      |      |                                                  |           |           |                         |                |  |
| 3936                          | 3955 | 3283 | 4662 | CDS product multifunctional expression regulator |           | 3936-3955 | 5:02:01                 |                |  |
| GGCGGCCAGGGGACGTGG            |      |      |      |                                                  |           |           |                         |                |  |
| 4047                          | 4068 | 3283 | 4662 | CDS product multifunctional expression regulator |           | 4047-4068 | 4:01:01                 |                |  |
| CCGGCTCACCTCGGCCACGGCC        |      |      |      |                                                  |           |           |                         |                |  |
| 4059                          | 4081 | 3283 | 4662 | CDS product multifunctional expression regulator |           | 4059-4081 | 5:02:01                 |                |  |

|                                          |      |      |      |                                                  |           |           |                            |
|------------------------------------------|------|------|------|--------------------------------------------------|-----------|-----------|----------------------------|
| GGCCACGGCCGCGGCAGCGCGG                   |      |      |      |                                                  |           |           |                            |
| 4129                                     | 4147 | 3283 | 4662 | CDS product multifunctional expression regulator |           | 4129-4147 | 4:01:01                    |
| CCGCGGCCGCGCAGCCTCC                      |      |      |      |                                                  |           |           |                            |
| 4238                                     | 4254 | 3283 | 4662 | CDS product multifunctional expression regulator |           | 4238-4254 | 4:01:01                    |
| CCGCGGGCCGCCGGCCC                        |      |      |      |                                                  |           |           |                            |
| 4298                                     | 4338 | 3283 | 4662 | CDS product multifunctional expression regulator |           | 4298-4338 | 6:03:01                    |
| CCGCGTCCCAGAGCTCCTCTCTCGCCCCGCGCCAGGAGCC |      |      |      |                                                  |           |           |                            |
| 4350                                     | 4376 | 3283 | 4662 | CDS product multifunctional expression regulator |           | 4350-4376 | 5:02:01                    |
| CCGCTGTGCGCGTTGCCCCGCGACC                |      |      |      |                                                  |           |           |                            |
| 4419                                     | 4435 | 3283 | 4662 | CDS product multifunctional expression regulator |           | 4419-4435 | 4:01:01                    |
| GGGGGCGGCCGCCGGGG                        |      |      |      |                                                  |           |           |                            |
| 4455                                     | 4487 | 3283 | 4662 | CDS product multifunctional expression regulator |           | 4455-4487 | 8:05:02                    |
| GGCGGCGGCCGAGCTGTGGCGGGAGCGGCCGG         |      |      |      |                                                  |           |           |                            |
| 4802                                     | 4825 | 4799 | 5836 | CDS product envelope glycoprotein K              | 4802-4825 | 4:01:01   | CCCGGAACCGGCAGCCTTTGCCCC   |
| 5022                                     | 5051 | 4799 | 5836 | CDS product envelope glycoprotein K              | 5022-5051 | 5:02:01   |                            |
| GGATGGCCACGGCTTCCAGGGCTGTCATGG           |      |      |      |                                                  |           |           |                            |
| 5163                                     | 5188 | 4799 | 5836 | CDS product envelope glycoprotein K              | 5163-5188 | 4:01:01   | CCGCGTACTCCAGGCCCATGAGGACC |
| 5175                                     | 5200 | 4799 | 5836 | CDS product envelope glycoprotein K              | 5175-5200 | 4:01:01   | GGCCCATGAGGACCGCGGCGCAGGGG |
| 5393                                     | 5414 | 4799 | 5836 | CDS product envelope glycoprotein K              | 5393-5414 | 5:02:01   | CCCAGCAGCCGCCGCTCCTGCC     |
| 5683                                     | 5701 | 4799 | 5836 | CDS product envelope glycoprotein K              | 5683-5701 | 4:01:01   | GGCGGTCGTGGCATTGGGG        |
| 5736                                     | 5756 | 4799 | 5836 | CDS product envelope glycoprotein K              | 5736-5756 | 4:01:01   | GGTTAAGGCCGAGCTGAGGG       |
| 5946                                     | 5969 | 5849 | 9106 | CDS product helicase-primase primase subunit     |           | 5946-5969 | 4:01:01                    |
| GGCCGTGGGCGTCGGCCGCTATGG                 |      |      |      |                                                  |           |           |                            |

|      |      |      |      |                                              |           |         |                 |
|------|------|------|------|----------------------------------------------|-----------|---------|-----------------|
| 5986 | 6007 | 5849 | 9106 | CDS product helicase-primase primase subunit | 5986-6007 | 4:01:01 |                 |
|      |      |      |      | GGCGTCCCGGTGGAGCGCAGG                        |           |         |                 |
| 6036 | 6050 | 5849 | 9106 | CDS product helicase-primase primase subunit | 6036-6050 | 4:01:01 | GGGGGCGGTATGTGG |
| 6189 | 6214 | 5849 | 9106 | CDS product helicase-primase primase subunit | 6189-6214 | 5:02:01 |                 |
|      |      |      |      | CCGCCACAAACGCCTCTACCTCGTCC                   |           |         |                 |
| 6636 | 6664 | 5849 | 9106 | CDS product helicase-primase primase subunit | 6636-6664 | 5:02:01 |                 |
|      |      |      |      | CCAGGCCCCGCACGGCCTCGGTGCCCCGC                |           |         |                 |
| 6666 | 6692 | 5849 | 9106 | CDS product helicase-primase primase subunit | 6666-6692 | 7:04:01 |                 |
|      |      |      |      | GGAGGTAGGGTGGCGGCACAGGCACGG                  |           |         |                 |
| 6722 | 6741 | 5849 | 9106 | CDS product helicase-primase primase subunit | 6722-6741 | 4:01:01 |                 |
|      |      |      |      | CCGCACGCCTCCGTGTCGCC                         |           |         |                 |
| 6810 | 6823 | 5849 | 9106 | CDS product helicase-primase primase subunit | 6810-6823 | 4:01:01 | CCTCCCAGCCCCGCC |
| 6946 | 6976 | 5849 | 9106 | CDS product helicase-primase primase subunit | 6946-6976 | 6:03:01 |                 |
|      |      |      |      | GGTCGCGCGGGCGTTTCGGGCGGGGGCGGG               |           |         |                 |
| 7009 | 7027 | 5849 | 9106 | CDS product helicase-primase primase subunit | 7009-7027 | 4:01:01 |                 |
|      |      |      |      | CCCCCAGTTCACCTCGGCC                          |           |         |                 |
| 7053 | 7074 | 5849 | 9106 | CDS product helicase-primase primase subunit | 7053-7074 | 4:01:01 |                 |
|      |      |      |      | CCACGACTCCCAGCCGAAGCC                        |           |         |                 |
| 7201 | 7217 | 5849 | 9106 | CDS product helicase-primase primase subunit | 7201-7217 | 4:01:01 |                 |
|      |      |      |      | GGGGGGGCAGGCCGAGG                            |           |         |                 |
| 7240 | 7256 | 5849 | 9106 | CDS product helicase-primase primase subunit | 7240-7256 | 4:01:01 |                 |
|      |      |      |      | GGCCTCCGGCGCGGCGG                            |           |         |                 |
| 7275 | 7311 | 5849 | 9106 | CDS product helicase-primase primase subunit | 7275-7311 | 6:03:01 |                 |

|                                                 |      |      |      |                                              |           |         |                  |
|-------------------------------------------------|------|------|------|----------------------------------------------|-----------|---------|------------------|
| GGTCGCGCCGGGCCAGGGCCGGCTCCCCGGCGTCGGG           |      |      |      |                                              |           |         |                  |
| 7282                                            | 7302 | 5849 | 9106 | CDS product helicase-primase primase subunit | 7282-7302 | 4:01:01 |                  |
| CCGGGCCAGGGCCGGCTCCCC                           |      |      |      |                                              |           |         |                  |
| 7415                                            | 7444 | 5849 | 9106 | CDS product helicase-primase primase subunit | 7415-7444 | 5:02:01 |                  |
| GGGAGGGCCACGCGGTAGACGGGCACCGGG                  |      |      |      |                                              |           |         |                  |
| 7440                                            | 7464 | 5849 | 9106 | CDS product helicase-primase primase subunit | 7440-7464 | 4:01:01 |                  |
| CCGGGCCGCGAACGCCCGTCTTTCC                       |      |      |      |                                              |           |         |                  |
| 7501                                            | 7525 | 5849 | 9106 | CDS product helicase-primase primase subunit | 7501-7525 | 7:04:01 |                  |
| GGCGGCCGGCGGTGCGGCGGCCAGG                       |      |      |      |                                              |           |         |                  |
| 7554                                            | 7579 | 5849 | 9106 | CDS product helicase-primase primase subunit | 7554-7579 | 5:02:01 |                  |
| GGGGGGCGGCGCCAGGGGCCGCGGGG                      |      |      |      |                                              |           |         |                  |
| 7595                                            | 7615 | 5849 | 9106 | CDS product helicase-primase primase subunit | 7595-7615 | 4:01:01 |                  |
| GGCTGGGACCGCGCGACTGG                            |      |      |      |                                              |           |         |                  |
| 7627                                            | 7642 | 5849 | 9106 | CDS product helicase-primase primase subunit | 7627-7642 | 4:01:01 | GGCCGCGGACGGGCGG |
| 7646                                            | 7659 | 5849 | 9106 | CDS product helicase-primase primase subunit | 7646-7659 | 4:01:01 | CCGCCCGCCTGCCC   |
| 7692                                            | 7705 | 5849 | 9106 | CDS product helicase-primase primase subunit | 7692-7705 | 4:01:01 | CCTCCACCCGGTCC   |
| 7750                                            | 7769 | 5849 | 9106 | CDS product helicase-primase primase subunit | 7750-7769 | 4:01:01 |                  |
| GGGCACGGCCAGAGCGGGG                             |      |      |      |                                              |           |         |                  |
| 7780                                            | 7827 | 5849 | 9106 | CDS product helicase-primase primase subunit | 7780-7827 | 9:06:02 |                  |
| GGGGGGGTAGGTCCTGGCCTCGGCGTACAGGCGGCCACGGCCGCCGG |      |      |      |                                              |           |         |                  |
| 7933                                            | 7943 | 5849 | 9106 | CDS product helicase-primase primase subunit | 7933-7943 | 4:01:01 | GGAGGCGGTGG      |
| 8130                                            | 8144 | 5849 | 9106 | CDS product helicase-primase primase subunit | 8130-8144 | 4:01:01 | CCTGCACCCGCCGCC  |
| 8156                                            | 8176 | 5849 | 9106 | CDS product helicase-primase primase subunit | 8156-8176 | 4:01:01 |                  |

|                                   |      |      |      |                                              |           |         |                         |
|-----------------------------------|------|------|------|----------------------------------------------|-----------|---------|-------------------------|
| GGGAGGGCTAGGGCGCCGGG              |      |      |      |                                              |           |         |                         |
| 8251                              | 8265 | 5849 | 9106 | CDS product helicase-primase primase subunit | 8251-8265 | 4:01:01 | GGTGGGGTTGGGGG          |
| 8349                              | 8369 | 5849 | 9106 | CDS product helicase-primase primase subunit | 8349-8369 | 4:01:01 |                         |
| GGAAGAGGTAGTACCGGTGG              |      |      |      |                                              |           |         |                         |
| 8501                              | 8536 | 5849 | 9106 | CDS product helicase-primase primase subunit | 8501-8536 | 7:04:01 |                         |
| CCCGAGCGCCCGCCCGCCGCGCACACCGCGGCC |      |      |      |                                              |           |         |                         |
| 8571                              | 8596 | 5849 | 9106 | CDS product helicase-primase primase subunit | 8571-8596 | 5:02:01 |                         |
| CCGAGGCCGTCCGCCCCGCGCGCGCC        |      |      |      |                                              |           |         |                         |
| 8658                              | 8687 | 5849 | 9106 | CDS product helicase-primase primase subunit | 8658-8687 | 4:01:01 |                         |
| CCTCTTCGTCCAGCGGTCCAACAGCGCCC     |      |      |      |                                              |           |         |                         |
| 8692                              | 8711 | 5849 | 9106 | CDS product helicase-primase primase subunit | 8692-8711 | 4:01:01 |                         |
| GGACAGCGGCTGGCCGCGG               |      |      |      |                                              |           |         |                         |
| 8718                              | 8739 | 5849 | 9106 | CDS product helicase-primase primase subunit | 8718-8739 | 4:01:01 |                         |
| CCGCGGCCAGCGCCCGCGCGCC            |      |      |      |                                              |           |         |                         |
| 8802                              | 8817 | 5849 | 9106 | CDS product helicase-primase primase subunit | 8802-8817 | 4:01:01 | CCCCGCCACCATAACC        |
| 9190                              | 9212 | 9105 | 9860 | CDS product tegument protein UL51            | 9190-9212 | 6:03:01 | CCCGGCCACCATGCTCCGCCTCC |
| 9217                              | 9230 | 9105 | 9860 | CDS product tegument protein UL51            | 9217-9230 | 4:01:01 | GGCGCTGGCGGCGG          |
| 9241                              | 9259 | 9105 | 9860 | CDS product tegument protein UL51            | 9241-9259 | 4:01:01 | CCTGCCCGCGACCCTGACC     |
| 9294                              | 9308 | 9105 | 9860 | CDS product tegument protein UL51            | 9294-9308 | 4:01:01 | GGCGGCTGGTGAAGG         |
| 9364                              | 9379 | 9105 | 9860 | CDS product tegument protein UL51            | 9364-9379 | 5:02:01 | CCGCCACCAGACCTCC        |
| 9388                              | 9419 | 9105 | 9860 | CDS product tegument protein UL51            | 9388-9419 | 6:03:01 |                         |
| CCCCAGCCTAAACGCCGTGGTGGCCACCCACC  |      |      |      |                                              |           |         |                         |
| 9614                              | 9628 | 9105 | 9860 | CDS product tegument protein UL51            | 9614-9628 | 4:01:01 | CCGGTACCCGCCACC         |

|                                                                                 |       |       |       |                                                   |             |          |                           |
|---------------------------------------------------------------------------------|-------|-------|-------|---------------------------------------------------|-------------|----------|---------------------------|
| 9666                                                                            | 9684  | 9105  | 9860  | CDS product tegument protein UL51                 | 9666-9684   | 4:01:01  | CCTCGCCAGTCCAGACCCC       |
| 9713                                                                            | 9734  | 9105  | 9860  | CDS product tegument protein UL51                 | 9713-9734   | 5:02:01  | CCCACGAGCCCCCTCCTCCCC     |
| 9743                                                                            | 9800  | 9105  | 9860  | CDS product tegument protein UL51                 | 9743-9800   | 12:09:03 |                           |
| CCCGCCGGCGAGCTCCCACACCCCCCAGCCCGCCGTGCCCCGTCAGTCCAGCC                           |       |       |       |                                                   |             |          |                           |
| 10110                                                                           | 10128 | 9977  | 10954 | CDS product deoxyuridine triphosphatase           | 10110-10128 | 4:01:01  | GGCCGTAGGTGGGAAAAGG       |
| 10145                                                                           | 10171 | 9977  | 10954 | CDS product deoxyuridine triphosphatase           | 10145-10171 | 6:03:01  |                           |
| CCCCGCCCCAACCACCAGGCGTCCTCC                                                     |       |       |       |                                                   |             |          |                           |
| 10626                                                                           | 10647 | 9977  | 10954 | CDS product deoxyuridine triphosphatase           | 10626-10647 | 4:01:01  | CCTTTACCGGTCCGCGATAGCC    |
| 11103                                                                           | 11119 | 10920 | 11228 | CDS product envelope glycoprotein N               | 11103-11119 | 4:01:01  | CCCCCGGCACGGCCGCC         |
| 11163                                                                           | 11182 | 10920 | 11228 | CDS product envelope glycoprotein N               | 11163-11182 | 4:01:01  | CCTGCCAGGCGTACGGGGCC      |
| 11555                                                                           | 11601 | 11473 | 12420 | CDS product tegument protein VP22                 | 11555-11601 | 8:05:02  |                           |
| CCGTGCGGCCCCCGCGGCACCAACCCGCGACTCCCGCCGACGGCC                                   |       |       |       |                                                   |             |          |                           |
| 11709                                                                           | 11724 | 11473 | 12420 | CDS product tegument protein VP22                 | 11709-11724 | 4:01:01  | CCCAACCGCCAGCGCC          |
| 11811                                                                           | 11833 | 11473 | 12420 | CDS product tegument protein VP22                 | 11811-11833 | 4:01:01  | GGTGTATACGGAGGGGGAACGG    |
| 11889                                                                           | 11972 | 11473 | 12420 | CDS product tegument protein VP22                 | 11889-11972 | 14:11:03 |                           |
| CCTCCCCAAAGCCTGCGCCGAGGCCACGCGCGCGCCACTCGCGCCAGCGCCGGCGGGCCGTTCCCAAGAGACCCGCGCC |       |       |       |                                                   |             |          |                           |
| 12046                                                                           | 12070 | 11473 | 12420 | CDS product tegument protein VP22                 | 12046-12070 | 5:02:01  | CCACCCCCAAAACGCCTAAGGCCCC |
| 12311                                                                           | 12323 | 11473 | 12420 | CDS product tegument protein VP22                 | 12311-12323 | 4:01:01  | GGTGGGCGGCGGG             |
| 12332                                                                           | 12347 | 11473 | 12420 | CDS product tegument protein VP22                 | 12332-12347 | 4:01:01  | CCGCCGGCACCGGTCC          |
| 12355                                                                           | 12380 | 11473 | 12420 | CDS product tegument protein VP22                 | 12355-12380 | 4:01:01  | GGCGCCGTCTCTAGGTGCGCCAGG  |
| 12669                                                                           | 12697 | 12567 | 13919 | CDS product transactivating tegument protein VP16 | 12669-12697 | 5:02:01  |                           |
| CCGGCGAGTCCGTCTTTGCCGGCCCGGCC                                                   |       |       |       |                                                   |             |          |                           |
| 12689                                                                           | 12706 | 12567 | 13919 | CDS product transactivating tegument protein VP16 | 12689-12706 | 4:01:01  |                           |

|                                       |       |       |       |                                                   |                                 |
|---------------------------------------|-------|-------|-------|---------------------------------------------------|---------------------------------|
| GGCCCGGCAAGAGGAGG                     |       |       |       |                                                   |                                 |
| 12707                                 | 12746 | 12567 | 13919 | CDS product transactivating tegument protein VP16 | 12707-12746 7:04:01             |
| CCTGCGCTGCCGCCCCCAAGGCGCCAGCCCCTCGGCC |       |       |       |                                                   |                                 |
| 12756                                 | 12786 | 12567 | 13919 | CDS product transactivating tegument protein VP16 | 12756-12786 5:02:01             |
| GGTTGCAGGGCGAGCTCGGGTTCCCGGAGGG       |       |       |       |                                                   |                                 |
| 12778                                 | 12802 | 12567 | 13919 | CDS product transactivating tegument protein VP16 | 12778-12802 5:02:01             |
| CCCGGAGGGCCCCACCCTCCTCTCC             |       |       |       |                                                   |                                 |
| 12991                                 | 13019 | 12567 | 13919 | CDS product transactivating tegument protein VP16 | 12991-13019 5:02:01             |
| GGCGCCGTCGTCGAGGACGACCTGGAGG          |       |       |       |                                                   |                                 |
| 13140                                 | 13163 | 12567 | 13919 | CDS product transactivating tegument protein VP16 | 13140-13163 5:02:01             |
| GGCGACAGGCGCGCGGCGGCGCGG              |       |       |       |                                                   |                                 |
| 13456                                 | 13466 | 12567 | 13919 | CDS product transactivating tegument protein VP16 | 13456-13466 4:01:01 CCACCGCCGCC |
| 13507                                 | 13519 | 12567 | 13919 | CDS product transactivating tegument protein VP16 | 13507-13519 4:01:01             |
| GGAGGAGGGGCGG                         |       |       |       |                                                   |                                 |
| 13600                                 | 13634 | 12567 | 13919 | CDS product transactivating tegument protein VP16 | 13600-13634 7:04:01             |
| GGAGGCCTACTCGGAGCGGCACCCGGCGGCGCCGG   |       |       |       |                                                   |                                 |
| 13621                                 | 13648 | 12567 | 13919 | CDS product transactivating tegument protein VP16 | 13621-13648 4:01:01             |
| CCCGGCGGCGCCGGCATGCCCCTGGCC           |       |       |       |                                                   |                                 |
| 13691                                 | 13715 | 12567 | 13919 | CDS product transactivating tegument protein VP16 | 13691-13715 4:01:01             |
| GGCACGACGGCCGAGGCCATGATGG             |       |       |       |                                                   |                                 |
| 13741                                 | 13762 | 12567 | 13919 | CDS product transactivating tegument protein VP16 | 13741-13762 4:01:01             |
| CCCTGGAGACCCGTTCCGCC                  |       |       |       |                                                   |                                 |
| 13850                                 | 13883 | 12567 | 13919 | CDS product transactivating tegument protein VP16 | 13850-13883 6:03:01             |

|                                                   |       |       |       |                                      |                                            |
|---------------------------------------------------|-------|-------|-------|--------------------------------------|--------------------------------------------|
| CCGGGGGCCCACGACCTGAGCTCCGACGCCACCC                |       |       |       |                                      |                                            |
| 14348                                             | 14363 | 14334 | 16991 | CDS product tegument protein VP13/14 | 14348-14363 4:01:01 GGAGAGCGGGGTGGG        |
| 14366                                             | 14384 | 14334 | 16991 | CDS product tegument protein VP13/14 | 14366-14384 4:01:01 CCGATACGCCGCCCCGCC     |
| 14376                                             | 14398 | 14334 | 16991 | CDS product tegument protein VP13/14 | 14376-14398 4:01:01 GGCCCCCGCGTCTGTGGAAGGG |
| 14460                                             | 14509 | 14334 | 16991 | CDS product tegument protein VP13/14 | 14460-14509 10:07:02                       |
| CCGTTGCGCCCCGTGAGCCCTCCTCTCCCCCGGGCCGCCCCCGGGCGCC |       |       |       |                                      |                                            |
| 14504                                             | 14529 | 14334 | 16991 | CDS product tegument protein VP13/14 | 14504-14529 7:04:01                        |
| GGCGCCGGGGGGCGGCCGGGGGGGG                         |       |       |       |                                      |                                            |
| 14571                                             | 14608 | 14334 | 16991 | CDS product tegument protein VP13/14 | 14571-14608 7:04:01                        |
| CCACGCCAGCAGCCCCCGACCCGGCCGCGGGGCC                |       |       |       |                                      |                                            |
| 14595                                             | 14615 | 14334 | 16991 | CDS product tegument protein VP13/14 | 14595-14615 4:01:01 GGCCGCGGGGCCAGGCTGG    |
| 14664                                             | 14681 | 14334 | 16991 | CDS product tegument protein VP13/14 | 14664-14681 4:01:01 CCCCTGCCCCGTGCCCC      |
| 14743                                             | 14770 | 14334 | 16991 | CDS product tegument protein VP13/14 | 14743-14770 6:03:01                        |
| GGAGGGGAAACCAGGGCGGAGCATTGG                       |       |       |       |                                      |                                            |
| 14787                                             | 14806 | 14334 | 16991 | CDS product tegument protein VP13/14 | 14787-14806 4:01:01 GGCGCGTTCTTACGGCGGG    |
| 14840                                             | 14854 | 14334 | 16991 | CDS product tegument protein VP13/14 | 14840-14854 4:01:01 CCGCCCGGGCCATCC        |
| 14902                                             | 14921 | 14334 | 16991 | CDS product tegument protein VP13/14 | 14902-14921 4:01:01 GGGGTTGGACGGGGACGAGG   |
| 14932                                             | 14946 | 14334 | 16991 | CDS product tegument protein VP13/14 | 14932-14946 4:01:01 GGAGGAAGAGGACGG        |
| 14962                                             | 14993 | 14334 | 16991 | CDS product tegument protein VP13/14 | 14962-14993 6:03:01                        |
| GGAAAACGGCGCGGGCGAGGAGGGCTTTGGGG                  |       |       |       |                                      |                                            |
| 15002                                             | 15029 | 14334 | 16991 | CDS product tegument protein VP13/14 | 15002-15029 5:02:01                        |
| GGCCCGCGCCGAGCCGCCTTGCTGG                         |       |       |       |                                      |                                            |
| 15004                                             | 15021 | 14334 | 16991 | CDS product tegument protein VP13/14 | 15004-15021 4:01:01 CCCGCGCCGAGCCGGCC      |



|                                       |       |       |       |     |         |          |         |         |
|---------------------------------------|-------|-------|-------|-----|---------|----------|---------|---------|
| 15042                                 | 15059 | 14334 | 16991 | CDS | product | tegument | protein | VP13/14 |
| 15079                                 | 15098 | 14334 | 16991 | CDS | product | tegument | protein | VP13/14 |
| 15197                                 | 15212 | 14334 | 16991 | CDS | product | tegument | protein | VP13/14 |
| 15286                                 | 15316 | 14334 | 16991 | CDS | product | tegument | protein | VP13/14 |
| CCTGCTCACCGCCCCGGTGGCCATGAACCCC       |       |       |       |     |         |          |         |         |
| 15321                                 | 15335 | 14334 | 16991 | CDS | product | tegument | protein | VP13/14 |
| 15340                                 | 15358 | 14334 | 16991 | CDS | product | tegument | protein | VP13/14 |
| 15686                                 | 15698 | 14334 | 16991 | CDS | product | tegument | protein | VP13/14 |
| 15833                                 | 15850 | 14334 | 16991 | CDS | product | tegument | protein | VP13/14 |
| 15862                                 | 15877 | 14334 | 16991 | CDS | product | tegument | protein | VP13/14 |
| 15986                                 | 16022 | 14334 | 16991 | CDS | product | tegument | protein | VP13/14 |
| GGCCCTCTGGTCTACTGGGCGGCGCTCAGGCGCGCGG |       |       |       |     |         |          |         |         |
| 16024                                 | 16039 | 14334 | 16991 | CDS | product | tegument | protein | VP13/14 |
| 16101                                 | 16129 | 14334 | 16991 | CDS | product | tegument | protein | VP13/14 |
| CCCATACGACCAGCCCCGGCTTTACCGCC         |       |       |       |     |         |          |         |         |
| 16521                                 | 16550 | 14334 | 16991 | CDS | product | tegument | protein | VP13/14 |
| CCGGCCACCTCAACCTGCTCCTAAACTGCC        |       |       |       |     |         |          |         |         |
| 16571                                 | 16586 | 14334 | 16991 | CDS | product | tegument | protein | VP13/14 |
| 16715                                 | 16731 | 14334 | 16991 | CDS | product | tegument | protein | VP13/14 |
| 16829                                 | 16850 | 14334 | 16991 | CDS | product | tegument | protein | VP13/14 |
| 16915                                 | 16932 | 14334 | 16991 | CDS | product | tegument | protein | VP13/14 |
| 16944                                 | 16969 | 14334 | 16991 | CDS | product | tegument | protein | VP13/14 |
| GGCGCGGCGGGCGGGGAAGTAGAGGG            |       |       |       |     |         |          |         |         |

|             |         |                       |
|-------------|---------|-----------------------|
| 15042-15059 | 4:01:01 | GGCAAATGGAGGCCGCGG    |
| 15079-15098 | 4:01:01 | GGCCAGGGTGATGGCGCGGG  |
| 15197-15212 | 4:01:01 | GGCATGTGGGAGGGGG      |
| 15286-15316 | 5:02:01 |                       |
|             |         |                       |
| 15321-15335 | 4:01:01 | GGGAGGAGCCGTGG        |
| 15340-15358 | 4:01:01 | CCACCGCGCTCGTTCCC     |
| 15686-15698 | 4:01:01 | GGGGGTCTGGCGG         |
| 15833-15850 | 4:01:01 | CCCCCGAGCACC GCCC     |
| 15862-15877 | 4:01:01 | GGTGGCCGCGCCAGG       |
| 15986-16022 | 6:03:01 |                       |
|             |         |                       |
| 16024-16039 | 4:01:01 | CCGAGACCCGCCACC       |
| 16101-16129 | 5:02:01 |                       |
|             |         |                       |
| 16521-16550 | 6:03:01 |                       |
|             |         |                       |
| 16571-16586 | 4:01:01 | GGGGGCGCCGGGTGG       |
| 16715-16731 | 4:01:01 | CCGATGCCCGGCCCCCC     |
| 16829-16850 | 4:01:01 | GGTAACCCGTTGACCTGGCGG |
| 16915-16932 | 4:01:01 | GGTGGCGGCGCACGGGGG    |
| 16944-16969 | 5:02:01 |                       |

|       |       |       |       |                                                              |                      |                       |
|-------|-------|-------|-------|--------------------------------------------------------------|----------------------|-----------------------|
| 16972 | 16986 | 14334 | 16991 | CDS product tegument protein VP13/14                         | 16972-16986 4:01:01  | CCCGCCCCGAGGCC        |
| 17135 | 17159 | 17121 | 19349 | CDS product tegument protein VP11/12                         | 17135-17159 4:01:01  |                       |
|       |       |       |       | CCGTGGCCCCACGTCTCCCGGACCC                                    |                      |                       |
| 17230 | 17258 | 17121 | 19349 | CDS product tegument protein VP11/12                         | 17230-17258 6:03:01  |                       |
|       |       |       |       | GGCGCTAAAGGAGGCCGCGGAGGGGCTGG                                |                      |                       |
| 17278 | 17304 | 17121 | 19349 | CDS product tegument protein VP11/12                         | 17278-17304 5:02:01  |                       |
|       |       |       |       | GGCCGAGCGGACGGCGGCTCTGTCGGG                                  |                      |                       |
| 17335 | 17396 | 17121 | 19349 | CDS product tegument protein VP11/12                         | 17335-17396 10:07:02 |                       |
|       |       |       |       | GGTCACCTCGGCCGTCGCGGGGACGTTTCGGGGAGTACCGGAGGGAATACGAGGCCGCGG |                      |                       |
| 17431 | 17467 | 17121 | 19349 | CDS product tegument protein VP11/12                         | 17431-17467 7:04:01  |                       |
|       |       |       |       | GGATGGGATCTGGCAGGTGGTGATCAGGAGCTACTGG                        |                      |                       |
| 17772 | 17810 | 17121 | 19349 | CDS product tegument protein VP11/12                         | 17772-17810 6:03:01  |                       |
|       |       |       |       | GGTGGCTGCTGTGGTTTATGGACCTGACGGACGCGAGGG                      |                      |                       |
| 17903 | 17933 | 17121 | 19349 | CDS product tegument protein VP11/12                         | 17903-17933 7:04:01  |                       |
|       |       |       |       | GGGCCCGGGTCTCGGCCGGAACGGGGGCGG                               |                      |                       |
| 18076 | 18104 | 17121 | 19349 | CDS product tegument protein VP11/12                         | 18076-18104 6:03:01  |                       |
|       |       |       |       | CCACCACCACCTGCAGTACCTCATCAACC                                |                      |                       |
| 18166 | 18187 | 17121 | 19349 | CDS product tegument protein VP11/12                         | 18166-18187 4:01:01  | GGCGCTGCGGGCCAGGGCCGG |
| 18229 | 18274 | 17121 | 19349 | CDS product tegument protein VP11/12                         | 18229-18274 7:04:01  |                       |
|       |       |       |       | GGCAAGCTGGGCCAACATGGAGCGGGCGTTCCGGCCTGGTTCGG                 |                      |                       |
| 18361 | 18387 | 17121 | 19349 | CDS product tegument protein VP11/12                         | 18361-18387 6:03:01  |                       |
|       |       |       |       | GGAGGCCGGCGAGCGCGCGAGGACGG                                   |                      |                       |
| 18388 | 18406 | 17121 | 19349 | CDS product tegument protein VP11/12                         | 18388-18406 5:02:01  | CCTCTCCCGCCGACCGCC    |

|                                           |       |       |       |                                      |
|-------------------------------------------|-------|-------|-------|--------------------------------------|
| 18418                                     | 18459 | 17121 | 19349 | CDS product tegument protein VP11/12 |
| CCCCTTCCGTGGCCCCCGCAAACCCCGCTCCCGAATCCCCC |       |       |       |                                      |
| 18724                                     | 18741 | 17121 | 19349 | CDS product tegument protein VP11/12 |
| 18820                                     | 18857 | 17121 | 19349 | CDS product tegument protein VP11/12 |
| GGGCCCCGACGAGGACAGGTTGGTTGACGGGGGGGCGG    |       |       |       |                                      |
| 19011                                     | 19031 | 17121 | 19349 | CDS product tegument protein VP11/12 |
| 19096                                     | 19122 | 17121 | 19349 | CDS product tegument protein VP11/12 |
| GGGCGGCGCGAGGGCCGAGGCCCGGG                |       |       |       |                                      |
| 19110                                     | 19135 | 17121 | 19349 | CDS product tegument protein VP11/12 |
| CCGAGGCCCGGGCCCCGCGTACGCC                 |       |       |       |                                      |
| 19144                                     | 19160 | 17121 | 19349 | CDS product tegument protein VP11/12 |
| 19206                                     | 19242 | 17121 | 19349 | CDS product tegument protein VP11/12 |
| CCCGCACCAAGGCCATAAACGCCTCCGGACCCCGGCC     |       |       |       |                                      |
| 19313                                     | 19334 | 17121 | 19349 | CDS product tegument protein VP11/12 |
| 19552                                     | 19577 | 19494 | 20105 | CDS product membrane protein UL45    |
| 19731                                     | 19749 | 19494 | 20105 | CDS product membrane protein UL45    |
| 19835                                     | 19853 | 19494 | 20105 | CDS product membrane protein UL45    |
| 20017                                     | 20035 | 19494 | 20105 | CDS product membrane protein UL45    |
| 20046                                     | 20060 | 19494 | 20105 | CDS product membrane protein UL45    |
| 20071                                     | 20093 | 19494 | 20105 | CDS product membrane protein UL45    |
| 20440                                     | 20476 | 20391 | 21809 | CDS product envelope glycoprotein C  |
| CCAGCAGGCCGAGGGCCAGCACCCCCCGACGATCCC      |       |       |       |                                      |
| 20591                                     | 20606 | 20391 | 21809 | CDS product envelope glycoprotein C  |

18418-18459 8:05:02

18724-18741 4:01:01 GGCGAGGGGTCCAGCGG

18820-18857 8:05:02

19011-19031 4:01:01 GGAGCGGGGCGGCCGTTGGGG

19096-19122 5:02:01

19110-19135 4:01:01

19144-19160 4:01:01 CCCGCGCTCCCGCCACC

19206-19242 7:04:01

19313-19334 4:01:01 CCCGCGCGCCGGAGTCCCACC

19552-19577 5:02:01 GGGGGCTGAGTGGGCGCGGCCTGG

19731-19749 4:01:01 GGGGCGCCGGGAGCTCGG

19835-19853 4:01:01 GGTGTGCGGTGGGACGCG

20017-20035 4:01:01 CCTATTACCCCGCTCCC

20046-20060 4:01:01 CCTATCCGCCGCTCC

20071-20093 4:01:01 GGGGCGGCAGAGAGGCAGTGGGG

20440-20476 6:03:01

20591-20606 4:01:01 CCTTTCGCCGCCCTCC

|                                          |       |       |       |                                     |
|------------------------------------------|-------|-------|-------|-------------------------------------|
| 20854                                    | 20870 | 20391 | 21809 | CDS product envelope glycoprotein C |
| 20881                                    | 20895 | 20391 | 21809 | CDS product envelope glycoprotein C |
| 21014                                    | 21036 | 20391 | 21809 | CDS product envelope glycoprotein C |
| 21117                                    | 21138 | 20391 | 21809 | CDS product envelope glycoprotein C |
| 21312                                    | 21338 | 20391 | 21809 | CDS product envelope glycoprotein C |
| 21590                                    | 21616 | 20391 | 21809 | CDS product envelope glycoprotein C |
| 21609                                    | 21635 | 20391 | 21809 | CDS product envelope glycoprotein C |
| 21668                                    | 21689 | 20391 | 21809 | CDS product envelope glycoprotein C |
| 21772                                    | 21791 | 20391 | 21809 | CDS product envelope glycoprotein C |
| 22177                                    | 22205 | 22005 | 23237 | CDS product envelope protein UL43   |
| CCGCGCCAAACCCGACGGCCGACAGCACC            |       |       |       |                                     |
| 22220                                    | 22239 | 22005 | 23237 | CDS product envelope protein UL43   |
| 22248                                    | 22279 | 22005 | 23237 | CDS product envelope protein UL43   |
| GGGCCGGCGGGCGCACGCGGACCACCAGGGG          |       |       |       |                                     |
| 22303                                    | 22317 | 22005 | 23237 | CDS product envelope protein UL43   |
| 22455                                    | 22484 | 22005 | 23237 | CDS product envelope protein UL43   |
| CCGAGGCACCCACGCGCTCCTCGGCCACC            |       |       |       |                                     |
| 22540                                    | 22557 | 22005 | 23237 | CDS product envelope protein UL43   |
| 22789                                    | 22809 | 22005 | 23237 | CDS product envelope protein UL43   |
| 22879                                    | 22918 | 22005 | 23237 | CDS product envelope protein UL43   |
| CCCAGGCCAGGATAGCCACCATGGCAGCCAGGGCCTGGCC |       |       |       |                                     |
| 22901                                    | 22925 | 22005 | 23237 | CDS product envelope protein UL43   |
| 22948                                    | 22967 | 22005 | 23237 | CDS product envelope protein UL43   |

|             |         |                             |
|-------------|---------|-----------------------------|
| 20854-20870 | 4:01:01 | CCTTGTACCAGTCCACC           |
| 20881-20895 | 4:01:01 | GGTTGGGCGGGTAGG             |
| 21014-21036 | 5:02:01 | CCACCGAAGCCGCACCGAGCGCC     |
| 21117-21138 | 4:01:01 | GGGGGCATGTAGGCCCCGATGG      |
| 21312-21338 | 5:02:01 | CCGAGCGGCCCCGCGCCCCCGTGTCC  |
| 21590-21616 | 4:01:01 | GGGGACCTTCGGTTTAAGGCCCTTTGG |
| 21609-21635 | 5:02:01 | CCCTTTGGCCCGCGCCTAGTCCTAGCC |
| 21668-21689 | 6:03:01 | GGCAGCGGTGGCCGGCGGGGGG      |
| 21772-21791 | 5:02:01 | GGAGCCCGGCGGCGGCCAGG        |
| 22177-22205 | 5:02:01 |                             |
| 22220-22239 | 5:02:01 | GGCGGCGGCGTGGAGCGCGG        |
| 22248-22279 | 5:02:01 |                             |
| 22303-22317 | 4:01:01 | GGCCGGCGGCCAGGG             |
| 22455-22484 | 5:02:01 |                             |
| 22540-22557 | 4:01:01 | GGCCGAGGTCGGTGAAGG          |
| 22789-22809 | 4:01:01 | GGTGTATTTGGACGGCGCAGG       |
| 22879-22918 | 7:04:01 |                             |
| 22901-22925 | 4:01:01 | GGCAGCCAGGGCCTGGCCGAAGCGG   |
| 22948-22967 | 4:01:01 | GGCGGGCCACGGAGACGCGG        |

|                                     |       |       |       |                                                 |             |                             |
|-------------------------------------|-------|-------|-------|-------------------------------------------------|-------------|-----------------------------|
| 23076                               | 23105 | 22005 | 23237 | CDS product envelope protein UL43               | 23076-23105 | 5:02:01                     |
| CCCACACACGCCAGCGCCTTGGTGCCGCC       |       |       |       |                                                 |             |                             |
| 23096                               | 23116 | 22005 | 23237 | CDS product envelope protein UL43               | 23096-23116 | 4:01:01 GGTGCCGCCAGGTGCAGGG |
| 23614                               | 23643 | 23412 | 24695 | CDS product DNA polymerase processivity subunit | 23614-23643 | 5:02:01                     |
| CCGCGAGGGCCGCATCTACCGCCGCGGCC       |       |       |       |                                                 |             |                             |
| 23981                               | 23999 | 23412 | 24695 | CDS product DNA polymerase processivity subunit | 23981-23999 | 4:01:01                     |
| GGGGAAGGAGGCCGTTCCG                 |       |       |       |                                                 |             |                             |
| 24189                               | 24209 | 23412 | 24695 | CDS product DNA polymerase processivity subunit | 24189-24209 | 4:01:01                     |
| GGCGCGGGCGCAGCGGGGGG                |       |       |       |                                                 |             |                             |
| 24349                               | 24380 | 23412 | 24695 | CDS product DNA polymerase processivity subunit | 24349-24380 | 5:02:01                     |
| CCAGCACGCCGCGGCGCGCTCCACGTTGGCC     |       |       |       |                                                 |             |                             |
| 24428                               | 24442 | 23412 | 24695 | CDS product DNA polymerase processivity subunit | 24428-24442 | 4:01:01 GGCGGCTTGATGGG      |
| 24603                               | 24637 | 23412 | 24695 | CDS product DNA polymerase processivity subunit | 24603-24637 | 8:05:02                     |
| CCGCCCTCCGGGTCCGCCGCTACCGGAGTCCAGCC |       |       |       |                                                 |             |                             |
| 25242                               | 25258 | 25185 | 26711 | CDS product tegument host shut-off protein      | 25242-25258 | 4:01:01 CCATCACCACCCGCCC    |
| 25470                               | 25502 | 25185 | 26711 | CDS product tegument host shut-off protein      | 25470-25502 | 6:03:01                     |
| CCAAGGCCATCGTCACCCAGACCATGAGCCGCC   |       |       |       |                                                 |             |                             |
| 25512                               | 25543 | 25185 | 26711 | CDS product tegument host shut-off protein      | 25512-25543 | 6:03:01                     |
| CCGGGCGCCTGCCGCGGCCCCCTGCCTCGCC     |       |       |       |                                                 |             |                             |
| 25605                               | 25623 | 25185 | 26711 | CDS product tegument host shut-off protein      | 25605-25623 | 4:01:01 CCGTCCCGGGCGCCGCGCC |
| 25800                               | 25816 | 25185 | 26711 | CDS product tegument host shut-off protein      | 25800-25816 | 4:01:01 CCAACCTGTACCACACC   |
| 25892                               | 25913 | 25185 | 26711 | CDS product tegument host shut-off protein      | 25892-25913 | 4:01:01                     |
| CCCCTGTTTCCCCGACGCTCC               |       |       |       |                                                 |             |                             |

|                                              |       |       |       |                                                |                                        |
|----------------------------------------------|-------|-------|-------|------------------------------------------------|----------------------------------------|
| 25981                                        | 26004 | 25185 | 26711 | CDS product tegument host shut-off protein     | 25981-26004 5:02:01                    |
| CCACACAGACCTCCACCAGCAGCC                     |       |       |       |                                                |                                        |
| 26198                                        | 26212 | 25185 | 26711 | CDS product tegument host shut-off protein     | 26198-26212 4:01:01 CCGGCGCCCCCGCCC    |
| 26251                                        | 26282 | 25185 | 26711 | CDS product tegument host shut-off protein     | 26251-26282 7:04:01                    |
| CCGCCCCGAGGACCGCCGCGCACCACGCCGCC             |       |       |       |                                                |                                        |
| 26291                                        | 26306 | 25185 | 26711 | CDS product tegument host shut-off protein     | 26291-26306 4:01:01 CCCCCGAGGACCGCC    |
| 26309                                        | 26327 | 25185 | 26711 | CDS product tegument host shut-off protein     | 26309-26327 4:01:01 GGCGCGGGCGGTCTTTGG |
| 26329                                        | 26351 | 25185 | 26711 | CDS product tegument host shut-off protein     | 26329-26351 4:01:01                    |
| CCCGACTACCCGCTTCTCCACC                       |       |       |       |                                                |                                        |
| 26361                                        | 26377 | 25185 | 26711 | CDS product tegument host shut-off protein     | 26361-26377 4:01:01 CCTCCCGCTACCCGCCC  |
| 26565                                        | 26596 | 25185 | 26711 | CDS product tegument host shut-off protein     | 26565-26596 5:02:01                    |
| CCCTGAAGAACCTCGTCCCGGACCCGACACC              |       |       |       |                                                |                                        |
| 26626                                        | 26643 | 25185 | 26711 | CDS product tegument host shut-off protein     | 26626-26643 4:01:01 CCACGTTCCACCCCTCC  |
| 27000                                        | 27047 | 26920 | 27867 | CDS product ribonucleotide reductase subunit 2 | 27000-27047 10:07:02                   |
| GGCAAGCGGAAGCTGGGGCGGGGGCGGTGCGTGGAACATGGGGG |       |       |       |                                                |                                        |
| 27332                                        | 27358 | 26920 | 27867 | CDS product ribonucleotide reductase subunit 2 | 27332-27358 6:03:01                    |
| GGTAGCGGATGGCGGCGAATGAGGAGG                  |       |       |       |                                                |                                        |
| 27419                                        | 27447 | 26920 | 27867 | CDS product ribonucleotide reductase subunit 2 | 27419-27447 7:04:01                    |
| CCCGCACCTTCGCCTCCAGCCACGCCACC                |       |       |       |                                                |                                        |
| 27452                                        | 27465 | 26920 | 27867 | CDS product ribonucleotide reductase subunit 2 | 27452-27465 4:01:01 GGCGGATGGCCGGG     |
| 27477                                        | 27493 | 26920 | 27867 | CDS product ribonucleotide reductase subunit 2 | 27477-27493 4:01:01                    |
| GGAGGCCACGTAGGCGG                            |       |       |       |                                                |                                        |
| 27605                                        | 27639 | 26920 | 27867 | CDS product ribonucleotide reductase subunit 2 | 27605-27639 5:02:01                    |

|                                      |       |       |       |                                                |                                     |
|--------------------------------------|-------|-------|-------|------------------------------------------------|-------------------------------------|
| GGTCGAAGAGGGCCGACAGGTCGCCAAGGTTTCAGG |       |       |       |                                                |                                     |
| 27700                                | 27723 | 26920 | 27867 | CDS product ribonucleotide reductase subunit 2 | 27700-27723 5:02:01                 |
| CCCTCCGAGAGCCGGGCCACGTCC             |       |       |       |                                                |                                     |
| 27825                                | 27850 | 26920 | 27867 | CDS product ribonucleotide reductase subunit 2 | 27825-27850 6:03:01                 |
| GGCGGGGGCCGCGGCTCTCGGGGG             |       |       |       |                                                |                                     |
| 28230                                | 28247 | 27954 | 30317 | CDS product ribonucleotide reductase subunit 1 | 28230-28247 4:01:01                 |
| GGGTGGCCGTCGGGGAGG                   |       |       |       |                                                |                                     |
| 28251                                | 28272 | 27954 | 30317 | CDS product ribonucleotide reductase subunit 1 | 28251-28272 5:02:01                 |
| CCGAACGCCCCCGCACCGACC                |       |       |       |                                                |                                     |
| 28323                                | 28341 | 27954 | 30317 | CDS product ribonucleotide reductase subunit 1 | 28323-28341 4:01:01                 |
| GGAAAGAGGTCGCGGATGG                  |       |       |       |                                                |                                     |
| 28511                                | 28545 | 27954 | 30317 | CDS product ribonucleotide reductase subunit 1 | 28511-28545 7:04:01                 |
| GGCGGTGCGGAGCCGGCGCCAGGCGTTGCGGTTGG  |       |       |       |                                                |                                     |
| 28619                                | 28637 | 27954 | 30317 | CDS product ribonucleotide reductase subunit 1 | 28619-28637 4:01:01                 |
| GGGCGGCAGGCCGTTTTGG                  |       |       |       |                                                |                                     |
| 28758                                | 28782 | 27954 | 30317 | CDS product ribonucleotide reductase subunit 1 | 28758-28782 4:01:01                 |
| CCCTGGACGCCTAGCCCCAGCGACC            |       |       |       |                                                |                                     |
| 28797                                | 28814 | 27954 | 30317 | CDS product ribonucleotide reductase subunit 1 | 28797-28814 4:01:01                 |
| CCGCGCTCCGACCGGGCC                   |       |       |       |                                                |                                     |
| 28903                                | 28918 | 27954 | 30317 | CDS product ribonucleotide reductase subunit 1 | 28903-28918 4:01:01 CCCCCCGGCCGTCCC |
| 28910                                | 28949 | 27954 | 30317 | CDS product ribonucleotide reductase subunit 1 | 28910-28949 7:04:01                 |
| GGCCGTCCCCGGGCGGGACCGAGGCACCGGGGCAGG |       |       |       |                                                |                                     |
| 29025                                | 29042 | 27954 | 30317 | CDS product ribonucleotide reductase subunit 1 | 29025-29042 4:01:01                 |

|                                      |       |       |       |                                                |                                            |
|--------------------------------------|-------|-------|-------|------------------------------------------------|--------------------------------------------|
| CCCGTCAGGGCCTCCTCC                   |       |       |       |                                                |                                            |
| 29265                                | 29295 | 27954 | 30317 | CDS product ribonucleotide reductase subunit 1 | 29265-29295 5:02:01                        |
| CCGGGCTCGCCGTCCAGGTGCCGCTGGTACC      |       |       |       |                                                |                                            |
| 29585                                | 29621 | 27954 | 30317 | CDS product ribonucleotide reductase subunit 1 | 29585-29621 7:04:01                        |
| CCCCACCTCCTCCATGAGGGCCCGACGGCCGAGTCC |       |       |       |                                                |                                            |
| 29659                                | 29683 | 27954 | 30317 | CDS product ribonucleotide reductase subunit 1 | 29659-29683 5:02:01                        |
| CCAGAGACCCTCTTTTCCGGCCGCC            |       |       |       |                                                |                                            |
| 29716                                | 29732 | 27954 | 30317 | CDS product ribonucleotide reductase subunit 1 | 29716-29732 4:01:01                        |
| CCTGACCGGCCAGCGCC                    |       |       |       |                                                |                                            |
| 29791                                | 29807 | 27954 | 30317 | CDS product ribonucleotide reductase subunit 1 | 29791-29807 4:01:01                        |
| CCATGGCCGGCTCCTCC                    |       |       |       |                                                |                                            |
| 29822                                | 29832 | 27954 | 30317 | CDS product ribonucleotide reductase subunit 1 | 29822-29832 4:01:01 GGCGGTGGCGG            |
| 29852                                | 29876 | 27954 | 30317 | CDS product ribonucleotide reductase subunit 1 | 29852-29876 4:01:01                        |
| CCCCATGGACTCCAGGTGCCCGCCC            |       |       |       |                                                |                                            |
| 30037                                | 30065 | 27954 | 30317 | CDS product ribonucleotide reductase subunit 1 | 30037-30065 5:02:01                        |
| CCATCGACTCCAGCCACACCCGGAGGTCC        |       |       |       |                                                |                                            |
| 30178                                | 30189 | 27954 | 30317 | CDS product ribonucleotide reductase subunit 1 | 30178-30189 4:01:01 CCACCACCTCCC           |
| 30190                                | 30223 | 27954 | 30317 | CDS product ribonucleotide reductase subunit 1 | 30190-30223 7:04:01                        |
| GGCGGGATGGCCGCGGGGGCAGCGTGGCCCCCGG   |       |       |       |                                                |                                            |
| 30217                                | 30244 | 27954 | 30317 | CDS product ribonucleotide reductase subunit 1 | 30217-30244 6:03:01                        |
| CCCCCGGCCCGTCTCGTACCCGTACCC          |       |       |       |                                                |                                            |
| 30706                                | 30726 | 30693 | 32090 | CDS product capsid triplex subunit 1           | 30706-30726 4:01:01 CCACCCAGCTTCCCGGCTCCC  |
| 30760                                | 30781 | 30693 | 32090 | CDS product capsid triplex subunit 1           | 30760-30781 4:01:01 CCACGTTGCCGAACCGCTCGCC |



|                                       |       |       |       |                                      |                                            |
|---------------------------------------|-------|-------|-------|--------------------------------------|--------------------------------------------|
| 30860                                 | 30896 | 30693 | 32090 | CDS product capsid triplex subunit 1 | 30860-30896 6:03:01                        |
| GGCTCGGCCGCGCAGGTCTGGGGTCCACTGGTACAGG |       |       |       |                                      |                                            |
| 30973                                 | 31011 | 30693 | 32090 | CDS product capsid triplex subunit 1 | 30973-31011 8:05:02                        |
| GGGGGAAGCCGCGTTGGGGCGGGTCCGGCGCATCGG  |       |       |       |                                      |                                            |
| 31012                                 | 31024 | 30693 | 32090 | CDS product capsid triplex subunit 1 | 31012-31024 4:01:01 CCCCCTCCGTACC          |
| 31069                                 | 31088 | 30693 | 32090 | CDS product capsid triplex subunit 1 | 31069-31088 4:01:01 CCGCATCCTCGAAGGCCACC   |
| 31249                                 | 31269 | 30693 | 32090 | CDS product capsid triplex subunit 1 | 31249-31269 5:02:01 GGGGGGCCCCGGTGCGGTCGG  |
| 31471                                 | 31490 | 30693 | 32090 | CDS product capsid triplex subunit 1 | 31471-31490 4:01:01 CCCTGACGGCCTCGGCCGCC   |
| 31509                                 | 31526 | 30693 | 32090 | CDS product capsid triplex subunit 1 | 31509-31526 4:01:01 CCGGCCCTGGCCGCGACC     |
| 31585                                 | 31605 | 30693 | 32090 | CDS product capsid triplex subunit 1 | 31585-31605 4:01:01 GGTCAGCGAGGGCGGCCAGG   |
| 31600                                 | 31619 | 30693 | 32090 | CDS product capsid triplex subunit 1 | 31600-31619 5:02:01 CCCAGGCCTCCTCCAGCTCC   |
| 31635                                 | 31665 | 30693 | 32090 | CDS product capsid triplex subunit 1 | 31635-31665 6:03:01                        |
| GGGGGCGTGCTGGCCGTGCCATCCCGGTGG        |       |       |       |                                      |                                            |
| 31695                                 | 31721 | 30693 | 32090 | CDS product capsid triplex subunit 1 | 31695-31721 4:01:01                        |
| GGGACCCCGGGCGCTCGGCCTGCGGG            |       |       |       |                                      |                                            |
| 31744                                 | 31763 | 30693 | 32090 | CDS product capsid triplex subunit 1 | 31744-31763 4:01:01 CCTGCCGGGTGAGCCGACC    |
| 31806                                 | 31828 | 30693 | 32090 | CDS product capsid triplex subunit 1 | 31806-31828 4:01:01 CCGATTGCCGCGCCACGATCCC |
| 31829                                 | 31848 | 30693 | 32090 | CDS product capsid triplex subunit 1 | 31829-31848 4:01:01 GGAGGTATCTGGATTCCGG    |
| 31917                                 | 31953 | 30693 | 32090 | CDS product capsid triplex subunit 1 | 31917-31953 7:04:01                        |
| GGGGGGGCAAACGCGGTGGGGTTCGTTGGCCCCCTGG |       |       |       |                                      |                                            |
| 31999                                 | 32020 | 30693 | 32090 | CDS product capsid triplex subunit 1 | 31999-32020 4:01:01 CCCACCACGTCACCCCGGTGCC |
| 32781                                 | 32802 | 32538 | 35609 | CDS product tegument protein UL37    | 32781-32802 4:01:01 CCATGCTGGCCGAGAACCTGCC |
| 32803                                 | 32821 | 32538 | 35609 | CDS product tegument protein UL37    | 32803-32821 4:01:01 GGGGCTGGTGCTGTGGCGG    |

32994 33041 32538 35609 CDS product tegument protein UL37  
 CCTTTCGCCAGACCCTGGCGGCCGTGGCCGAGCGACCCCCGGGCCC  
 33136 33160 32538 35609 CDS product tegument protein UL37  
 33276 33297 32538 35609 CDS product tegument protein UL37  
 33414 33439 32538 35609 CDS product tegument protein UL37  
 33525 33553 32538 35609 CDS product tegument protein UL37  
 CCGGGGCCCTGGCCATCCACGCCACGGCC  
 33645 33666 32538 35609 CDS product tegument protein UL37  
 33673 33707 32538 35609 CDS product tegument protein UL37  
 GGTGGCGGACGCTCTGGTGGGCGCCGGCTTTACGG  
 33764 33799 32538 35609 CDS product tegument protein UL37  
 GGCTCCGGCGAGGGCGACGCGGGCGGGAGGGCGGG  
 33817 33833 32538 35609 CDS product tegument protein UL37  
 33867 33887 32538 35609 CDS product tegument protein UL37  
 33906 33934 32538 35609 CDS product tegument protein UL37  
 CCACCACCCTCTCAACCCTCGAGCCCGCC  
 33949 33980 32538 35609 CDS product tegument protein UL37  
 GGCGGCGCTGGGCTGCCGACAAGGGGCTGG  
 34309 34339 32538 35609 CDS product tegument protein UL37  
 CCCGTCCTTCGCCCCGTACCTGCTGGCCACC  
 34422 34443 32538 35609 CDS product tegument protein UL37  
 34524 34537 32538 35609 CDS product tegument protein UL37  
 34584 34614 32538 35609 CDS product tegument protein UL37

32994-33041 8:05:02  
 33136-33160 5:02:01 GGAAGGCCTCCGGGTCGTGGCCCCGG  
 33276-33297 4:01:01 GGGCGGGCGGGGCGCCACGG  
 33414-33439 4:01:01 CCTCGGCCCTAGCGCACAGGACCCC  
 33525-33553 6:03:01  
 33645-33666 5:02:01 CCATCCAGGCCAGCACCTCCCC  
 33673-33707 7:04:01  
 33764-33799 7:04:01  
 33817-33833 4:01:01 GGCGGTGGGATGCGTGG  
 33867-33887 4:01:01 GGTCTACGGGTACGGCCTGG  
 33906-33934 6:03:01  
 33949-33980 6:03:01  
 34309-34339 6:03:01  
 34422-34443 4:01:01 GGGCGGGGACTACGGGACGGG  
 34524-34537 4:01:01 CCCCCACGCCGACC  
 34584-34614 6:03:01

|                                                |       |       |       |                                    |                                                  |
|------------------------------------------------|-------|-------|-------|------------------------------------|--------------------------------------------------|
| CCGCCGTGGCCGGCGCCATCGCCCTCATCCC                |       |       |       |                                    |                                                  |
| 34678                                          | 34706 | 32538 | 35609 | CDS product tegument protein UL37  | 34678-34706 5:02:01                              |
| CCTCTTCCTGACGGCCGTCCACAAGCGCC                  |       |       |       |                                    |                                                  |
| 34816                                          | 34847 | 32538 | 35609 | CDS product tegument protein UL37  | 34816-34847 5:02:01                              |
| GGCGGCCGTGCTGGGGCACCAGGCCGTGTCGG               |       |       |       |                                    |                                                  |
| 34880                                          | 34917 | 32538 | 35609 | CDS product tegument protein UL37  | 34880-34917 8:05:02                              |
| GGGACGTGGCGGCTGGTCGACCTGGTGGACGCGGTCGG         |       |       |       |                                    |                                                  |
| 34995                                          | 35030 | 32538 | 35609 | CDS product tegument protein UL37  | 34995-35030 5:02:01                              |
| GGGCCACTGAGGCCCTGCAGGAGTGCAGGGCGCTGG           |       |       |       |                                    |                                                  |
| 35070                                          | 35087 | 32538 | 35609 | CDS product tegument protein UL37  | 35070-35087 4:01:01 CCCCCCTCCTCGCGCGCC           |
| 35113                                          | 35134 | 32538 | 35609 | CDS product tegument protein UL37  | 35113-35134 4:01:01 GCGCTGGCCATCAAGCGGGG         |
| 35143                                          | 35163 | 32538 | 35609 | CDS product tegument protein UL37  | 35143-35163 4:01:01 GGGGGCGCCGAGCGCCCGG          |
| 35343                                          | 35360 | 32538 | 35609 | CDS product tegument protein UL37  | 35343-35360 4:01:01 GCGGGAGCTCGAGGCGG            |
| 35422                                          | 35455 | 32538 | 35609 | CDS product tegument protein UL37  | 35422-35455 6:03:01                              |
| CCTCAGCCGCGCGCCAACATCGCCTCGTGGGCC              |       |       |       |                                    |                                                  |
| 35841                                          | 35867 | 35836 | 45897 | CDS product large tegument protein | 35841-35867 6:03:01 CCCAAGCCCTCGCCGCGCCCCCCCCGCC |
| 35868                                          | 35903 | 35836 | 45897 | CDS product large tegument protein | 35868-35903 7:04:01                              |
| GGGGGAAGCCGCGGGGCGGACGTGGTGGTCGTGGG            |       |       |       |                                    |                                                  |
| 36017                                          | 36063 | 35836 | 45897 | CDS product large tegument protein | 36017-36063 10:07:02                             |
| GGCAGACGCGGTGGACGGGTCGCTGGTGGAGGGCCAGGCGTGACGG |       |       |       |                                    |                                                  |
| 36064                                          | 36079 | 35836 | 45897 | CDS product large tegument protein | 36064-36079 4:01:01 CCGCCAGCGTGCCCCC             |
| 36295                                          | 36324 | 35836 | 45897 | CDS product large tegument protein | 36295-36324 5:02:01                              |
| CCATAGGCGCCATCGGCCTCGCCGTGTACC                 |       |       |       |                                    |                                                  |

36681 36699 35836 45897 CDS product large tegument protein  
 36823 36844 35836 45897 CDS product large tegument protein  
 36875 36916 35836 45897 CDS product large tegument protein  
 CCTGGCTGCCGTGGACGCCACCCACAGCCCCGCCGGGCGCCC  
 36971 37014 35836 45897 CDS product large tegument protein  
 GGGGGAGGGCGCCGCGGGCGCGTGGGCCGAGGCGCTCGAGGAGG  
 37037 37064 35836 45897 CDS product large tegument protein  
 37168 37187 35836 45897 CDS product large tegument protein  
 37337 37357 35836 45897 CDS product large tegument protein  
 37366 37388 35836 45897 CDS product large tegument protein  
 37417 37449 35836 45897 CDS product large tegument protein  
 CCGCCGTGCCCCACCCACGGCGGCCGTGGACC  
 37456 37485 35836 45897 CDS product large tegument protein  
 GGGAGACGGGCATGGCCCTTGGCGACGTGG  
 37638 37650 35836 45897 CDS product large tegument protein  
 37652 37674 35836 45897 CDS product large tegument protein  
 37679 37717 35836 45897 CDS product large tegument protein  
 GGAGCGGCTGGTGGCCGCCATGGACCGGGCAGGCGGCGG  
 37841 37862 35836 45897 CDS product large tegument protein  
 37901 37931 35836 45897 CDS product large tegument protein  
 CCAGCCAGCGGACCCCCGGGGGCCGACGCC  
 37934 37962 35836 45897 CDS product large tegument protein  
 GGCGGAGCTGGCCAGGTCGCTGGACCTGG

36681-36699 4:01:01 GGGGCGCAGGGCGAGGAGG  
 36823-36844 4:01:01 CCCTGCCCAAGCGCCGGCGCCC  
 36875-36916 7:04:01  
 36971-37014 8:05:02  
 37037-37064 5:02:01 GGTCGAGGGCGACGGCGAGAGCCAGGG  
 37168-37187 4:01:01 CCGCCGAGGGCCTCGGCGCC  
 37337-37357 4:01:01 GGCCTTTCTGGTGGAGAACGG  
 37366-37388 4:01:01 CCCGCTCCGACGCCCCGTGCGCC  
 37417-37449 6:03:01  
 37456-37485 5:02:01  
 37638-37650 4:01:01 GGGGGTGGCGTGG  
 37652-37674 4:01:01 CCCACTCGGCCTCTACACCCACC  
 37679-37717 9:06:02  
 37841-37862 5:02:01 CCTCCTCGCCCTGGAGGCCGCC  
 37901-37931 6:03:01  
 37934-37962 6:03:01

|                                               |       |       |       |                                    |
|-----------------------------------------------|-------|-------|-------|------------------------------------|
| 37958                                         | 37972 | 35836 | 45897 | CDS product large tegument protein |
| 37973                                         | 38017 | 35836 | 45897 | CDS product large tegument protein |
| GGCGCGGCTGGCCAAGGTGGCAGAGAAGGCCGAGGCGCTCGTGGG |       |       |       |                                    |
| 38062                                         | 38082 | 35836 | 45897 | CDS product large tegument protein |
| 38091                                         | 38133 | 35836 | 45897 | CDS product large tegument protein |
| GGTGCGCGGTTCCAGGTGGCCAGCGCGGCCGTGGCCAACCTGG   |       |       |       |                                    |
| 38102                                         | 38139 | 35836 | 45897 | CDS product large tegument protein |
| CCAGGTGGCCAGCGCGGCCGTGGCCAACCTGGAGCGCC        |       |       |       |                                    |
| 38162                                         | 38187 | 35836 | 45897 | CDS product large tegument protein |
| 38188                                         | 38202 | 35836 | 45897 | CDS product large tegument protein |
| 38294                                         | 38310 | 35836 | 45897 | CDS product large tegument protein |
| 38339                                         | 38367 | 35836 | 45897 | CDS product large tegument protein |
| GGGACACCTGGAGAAGCGGGAGCTGGAGG                 |       |       |       |                                    |
| 38458                                         | 38474 | 35836 | 45897 | CDS product large tegument protein |
| 38471                                         | 38496 | 35836 | 45897 | CDS product large tegument protein |
| 38594                                         | 38616 | 35836 | 45897 | CDS product large tegument protein |
| 38644                                         | 38666 | 35836 | 45897 | CDS product large tegument protein |
| 38777                                         | 38808 | 35836 | 45897 | CDS product large tegument protein |
| GGCGCGGGACGCGCGGGTTGCCGCGGCCGAGG              |       |       |       |                                    |
| 38797                                         | 38819 | 35836 | 45897 | CDS product large tegument protein |
| 38883                                         | 38904 | 35836 | 45897 | CDS product large tegument protein |
| 38909                                         | 38927 | 35836 | 45897 | CDS product large tegument protein |
| 39050                                         | 39063 | 35836 | 45897 | CDS product large tegument protein |

|             |         |                           |
|-------------|---------|---------------------------|
| 37958-37972 | 4:01:01 | CCTGGCCGCCGTGCC           |
| 37973-38017 | 8:05:02 |                           |
| 38062-38082 | 4:01:01 | CCCAGCCATCGCCATGGACC      |
| 38091-38133 | 7:04:01 |                           |
| 38102-38139 | 6:03:01 |                           |
| 38162-38187 | 5:02:01 | GGACCGGGCCGCGGGGCTGCGGCGG |
| 38188-38202 | 4:01:01 | CCGCCCGCGGCGTCC           |
| 38294-38310 | 4:01:01 | GGCGCTGGGGGCGTGGG         |
| 38339-38367 | 5:02:01 |                           |
| 38458-38474 | 4:01:01 | CCGCCGTGACCAGGCC          |
| 38471-38496 | 5:02:01 | GGCCGCGGCGACGCGTCGGACTCGG |
| 38594-38616 | 7:04:01 | GGAGGTGGCGGCGCAGGTGGGGG   |
| 38644-38666 | 4:01:01 | CCCACGCCGCGGCCAGCGGGCC    |
| 38777-38808 | 5:02:01 |                           |
| 38797-38819 | 4:01:01 | CCGCGGCCGAGGACCTGCGCGCC   |
| 38883-38904 | 4:01:01 | GGCAGTATCGGGAGGCGCTGG     |
| 38909-38927 | 4:01:01 | CCCCAACGCCACACGGCC        |
| 39050-39063 | 5:02:01 | GGGGCGGTGGAGG             |

|                                          |       |       |       |                                    |
|------------------------------------------|-------|-------|-------|------------------------------------|
| 39091                                    | 39102 | 35836 | 45897 | CDS product large tegument protein |
| 39191                                    | 39204 | 35836 | 45897 | CDS product large tegument protein |
| 39256                                    | 39272 | 35836 | 45897 | CDS product large tegument protein |
| 39302                                    | 39315 | 35836 | 45897 | CDS product large tegument protein |
| 39326                                    | 39345 | 35836 | 45897 | CDS product large tegument protein |
| 39356                                    | 39390 | 35836 | 45897 | CDS product large tegument protein |
| GGCGCGGCACGTGGCATCCGAGGTGACGGCCGTGG      |       |       |       |                                    |
| 39385                                    | 39398 | 35836 | 45897 | CDS product large tegument protein |
| 39418                                    | 39439 | 35836 | 45897 | CDS product large tegument protein |
| 39541                                    | 39561 | 35836 | 45897 | CDS product large tegument protein |
| 39742                                    | 39756 | 35836 | 45897 | CDS product large tegument protein |
| 39770                                    | 39800 | 35836 | 45897 | CDS product large tegument protein |
| CCGCTTCAACCCCCACGCGCCCGAGAACGCC          |       |       |       |                                    |
| 39811                                    | 39828 | 35836 | 45897 | CDS product large tegument protein |
| 39862                                    | 39884 | 35836 | 45897 | CDS product large tegument protein |
| 39894                                    | 39918 | 35836 | 45897 | CDS product large tegument protein |
| 40064                                    | 40095 | 35836 | 45897 | CDS product large tegument protein |
| GGGGCACTTGACTTCGAGGCCGAGATGGAGG          |       |       |       |                                    |
| 40127                                    | 40147 | 35836 | 45897 | CDS product large tegument protein |
| 40189                                    | 40229 | 35836 | 45897 | CDS product large tegument protein |
| GGGCGGAGGAGGCCGAACGGGCGCTGGAGGCGGCGTGCGG |       |       |       |                                    |
| 40274                                    | 40310 | 35836 | 45897 | CDS product large tegument protein |
| CCTGGAGGCCTTCGACCAGACCAGGTTCCCGGGTCC     |       |       |       |                                    |

|             |         |                           |
|-------------|---------|---------------------------|
| 39091-39102 | 4:01:01 | GGGAGGCGGTGG              |
| 39191-39204 | 4:01:01 | CCAGGCCCGCTCC             |
| 39256-39272 | 4:01:01 | CCGCCGTGTCGGCCGCC         |
| 39302-39315 | 4:01:01 | GGCGGCTCCGGGGG            |
| 39326-39345 | 4:01:01 | GGCGGACGCGCTGGACGGGG      |
| 39356-39390 | 6:03:01 |                           |
|             |         |                           |
| 39385-39398 | 4:01:01 | CCGTGGCCCGCCGCC           |
| 39418-39439 | 4:01:01 | GGCTGGACGGGACGCCTTGGG     |
| 39541-39561 | 4:01:01 | GGCAGCGGCGGAGCGGGAGG      |
| 39742-39756 | 4:01:01 | CCGTCACCACCGTCC           |
| 39770-39800 | 5:02:01 |                           |
|             |         |                           |
| 39811-39828 | 5:02:01 | CCAACCCCACCATCCACC        |
| 39862-39884 | 5:02:01 | CCCTGGCCGCGCCGATCCTCGCC   |
| 39894-39918 | 6:03:01 | GGCGGCGTGGACGTGGAGGAGCTGG |
| 40064-40095 | 5:02:01 |                           |
|             |         |                           |
| 40127-40147 | 4:01:01 | GGCCTCGGGGTCCGCGCGGG      |
| 40189-40229 | 9:06:02 |                           |
|             |         |                           |
| 40274-40310 | 6:03:01 |                           |

|                                                       |       |       |       |                                    |                     |                             |
|-------------------------------------------------------|-------|-------|-------|------------------------------------|---------------------|-----------------------------|
| 40324                                                 | 40350 | 35836 | 45897 | CDS product large tegument protein | 40324-40350 6:03:01 | CCGCGGCCCTTGCCGTCCGCCAGGACC |
| 40387                                                 | 40415 | 35836 | 45897 | CDS product large tegument protein | 40387-40415 7:04:01 |                             |
| CCGTCCGCCGCGAGGCCACCGACCGGGCC                         |       |       |       |                                    |                     |                             |
| 40433                                                 | 40443 | 35836 | 45897 | CDS product large tegument protein | 40433-40443 4:01:01 | GGTGGTGGAGG                 |
| 40478                                                 | 40497 | 35836 | 45897 | CDS product large tegument protein | 40478-40497 4:01:01 | CCTAGCCAACCTCAAGAACC        |
| 40547                                                 | 40563 | 35836 | 45897 | CDS product large tegument protein | 40547-40563 4:01:01 | GGCGGCCTCGGCCGAGG           |
| 40628                                                 | 40640 | 35836 | 45897 | CDS product large tegument protein | 40628-40640 4:01:01 | GGCGGTGGAGTGG               |
| 41231                                                 | 41261 | 35836 | 45897 | CDS product large tegument protein | 41231-41261 7:04:01 |                             |
| GGCGATGGGCTCGGCGGCGTCGGGCGGCCG                        |       |       |       |                                    |                     |                             |
| 41258                                                 | 41276 | 35836 | 45897 | CDS product large tegument protein | 41258-41276 4:01:01 | CCGGCCCCACCTCGAGGCC         |
| 41342                                                 | 41355 | 35836 | 45897 | CDS product large tegument protein | 41342-41355 4:01:01 | GGGGACAAGGAGG               |
| 41493                                                 | 41516 | 35836 | 45897 | CDS product large tegument protein | 41493-41516 4:01:01 | GGCCGAACAGGGCGGTGCATGCGG    |
| 41597                                                 | 41618 | 35836 | 45897 | CDS product large tegument protein | 41597-41618 5:02:01 | CCTTGGCCTGGACCGGGCCGCC      |
| 41783                                                 | 41804 | 35836 | 45897 | CDS product large tegument protein | 41783-41804 5:02:01 | GGCGGGCGGCTTCGCGGTGCGG      |
| 41826                                                 | 41842 | 35836 | 45897 | CDS product large tegument protein | 41826-41842 4:01:01 | GGCGGGAGCGGAAGTGG           |
| 42033                                                 | 42055 | 35836 | 45897 | CDS product large tegument protein | 42033-42055 4:01:01 | GGGCCC GCGGAGCCCGGGGCGGG    |
| 42059                                                 | 42112 | 35836 | 45897 | CDS product large tegument protein | 42059-42112 9:06:02 |                             |
| CCCCTCTCGGTCCGCCACCGGCAGCGCCCCGGGCCGGTGGCGCCGCTGCCGCC |       |       |       |                                    |                     |                             |
| 42209                                                 | 42227 | 35836 | 45897 | CDS product large tegument protein | 42209-42227 4:01:01 | CCTCTGGCTCCACTCCCCC         |
| 42228                                                 | 42277 | 35836 | 45897 | CDS product large tegument protein | 42228-42277 7:04:01 |                             |
| GGGGAGCGGGGCCGCGCGGCCGCGCCAAAGTGCCGCGGCCATCCCGGG      |       |       |       |                                    |                     |                             |
| 42239                                                 | 42283 | 35836 | 45897 | CDS product large tegument protein | 42239-42283 7:04:01 |                             |
| CCGCGCGGCCGCGGCCAAAGTGCCGCGGCCATCCCGGGCAACCC          |       |       |       |                                    |                     |                             |

|                                                     |       |       |       |                                    |             |          |                             |
|-----------------------------------------------------|-------|-------|-------|------------------------------------|-------------|----------|-----------------------------|
| 42448                                               | 42473 | 35836 | 45897 | CDS product large tegument protein | 42448-42473 | 5:02:01  | CCGCGGCCGCCGAAACGGCCCCACCC  |
| 42713                                               | 42740 | 35836 | 45897 | CDS product large tegument protein | 42713-42740 | 5:02:01  | CCCGGCCGTTTCTCGGACCTCAGCTCC |
| 42820                                               | 42861 | 35836 | 45897 | CDS product large tegument protein | 42820-42861 | 8:05:02  |                             |
| CCATGATAGCCTCCAAGCCGCTGGCCGACGCGCCCCCTTGCC          |       |       |       |                                    |             |          |                             |
| 42907                                               | 42935 | 35836 | 45897 | CDS product large tegument protein | 42907-42935 | 7:04:01  |                             |
| CCCCGCCCCGCCGCCGCGGAGCCGACC                         |       |       |       |                                    |             |          |                             |
| 43063                                               | 43079 | 35836 | 45897 | CDS product large tegument protein | 43063-43079 | 4:01:01  | GGGCAACGGCGGAGGGG           |
| 43134                                               | 43163 | 35836 | 45897 | CDS product large tegument protein | 43134-43163 | 7:04:01  |                             |
| CCGTACGCCACCATCTCGCCCCGCCACCC                       |       |       |       |                                    |             |          |                             |
| 43179                                               | 43202 | 35836 | 45897 | CDS product large tegument protein | 43179-43202 | 5:02:01  | CCGGGGCACCCACCGAGCGCCCC     |
| 43236                                               | 43261 | 35836 | 45897 | CDS product large tegument protein | 43236-43261 | 5:02:01  | GGCGCGGCGAGCCGGGGCGAAACGG   |
| 43274                                               | 43295 | 35836 | 45897 | CDS product large tegument protein | 43274-43295 | 4:01:01  | CCTCGACAACCAGCCGTATGCC      |
| 43345                                               | 43367 | 35836 | 45897 | CDS product large tegument protein | 43345-43367 | 5:02:01  | GGCAGGAGTGGCTCGAGGACGGG     |
| 43440                                               | 43457 | 35836 | 45897 | CDS product large tegument protein | 43440-43457 | 4:01:01  | CCGCCCAAGTCGCCACCC          |
| 43473                                               | 43529 | 35836 | 45897 | CDS product large tegument protein | 43473-43529 | 12:09:03 |                             |
| CCTCTCGCCGGGGCCCGCCGCCCAAGTCGCCGCGCTGACCCGGCCGCCGCC |       |       |       |                                    |             |          |                             |
| 43576                                               | 43601 | 35836 | 45897 | CDS product large tegument protein | 43576-43601 | 5:02:01  | CCTTGCCCAACAAGCCCCCGCGCCC   |
| 43611                                               | 43634 | 35836 | 45897 | CDS product large tegument protein | 43611-43634 | 6:03:01  | CCCGCCGCCACCCCGAGGCGCCC     |
| 43628                                               | 43652 | 35836 | 45897 | CDS product large tegument protein | 43628-43652 | 5:02:01  | GGCGCCCTCGGTGGCGGGGCGGAGG   |
| 43657                                               | 43681 | 35836 | 45897 | CDS product large tegument protein | 43657-43681 | 6:03:01  | CCGCCGCCCAACAACGCCGCCCCC    |
| 43696                                               | 43730 | 35836 | 45897 | CDS product large tegument protein | 43696-43730 | 7:04:01  |                             |
| CCGCGGCCGCCCAAAACCCGCTGGAATACCC                     |       |       |       |                                    |             |          |                             |
| 43761                                               | 43793 | 35836 | 45897 | CDS product large tegument protein | 43761-43793 | 6:03:01  |                             |



|                                                       |       |       |       |                                    |                                             |
|-------------------------------------------------------|-------|-------|-------|------------------------------------|---------------------------------------------|
| CCCGATGCCTCCCGGGCGCCGAGCGCCGGGCCCC                    |       |       |       |                                    |                                             |
| 43828                                                 | 43851 | 35836 | 45897 | CDS product large tegument protein | 43828-43851 4:01:01 CCAAGACGCCAGCGGGCCCCGCC |
| 43891                                                 | 43910 | 35836 | 45897 | CDS product large tegument protein | 43891-43910 5:02:01 CCTCCTCGGCCGCCACTGCC    |
| 43953                                                 | 43987 | 35836 | 45897 | CDS product large tegument protein | 43953-43987 7:04:01                         |
| CCGGCCAGACTGCCTCCCGAGGCCAGCCCCAAGCC                   |       |       |       |                                    |                                             |
| 44069                                                 | 44122 | 35836 | 45897 | CDS product large tegument protein | 44069-44122 9:06:02                         |
| CCCGCTTCCCCCTCCGCCGTCAGCCCCGTCGAGCCCGCGCCCGCGTCGTCCCC |       |       |       |                                    |                                             |
| 44138                                                 | 44171 | 35836 | 45897 | CDS product large tegument protein | 44138-44171 8:05:02                         |
| CCCGCTCCCCCTCCGCCACCCCTGAAGCCGCCC                     |       |       |       |                                    |                                             |
| 44186                                                 | 44218 | 35836 | 45897 | CDS product large tegument protein | 44186-44218 7:04:01                         |
| CCCGCCCCCGCGCCAGTGCCGGCGCCCTCCC                       |       |       |       |                                    |                                             |
| 44219                                                 | 44271 | 35836 | 45897 | CDS product large tegument protein | 44219-44271 11:08:02                        |
| GGCGGCGTCTGGGGCCAAACGGCAGGACGGGCGGCTCCGGCGGTCCGGCGAGG |       |       |       |                                    |                                             |
| 44277                                                 | 44305 | 35836 | 45897 | CDS product large tegument protein | 44277-44305 6:03:01                         |
| CCTCCGTCCGGCCACAATCCACTGCGCC                          |       |       |       |                                    |                                             |
| 44397                                                 | 44441 | 35836 | 45897 | CDS product large tegument protein | 44397-44441 8:05:02                         |
| CCGATACCCGAGTCCCCGACTGAGCCGGCGCCGCCCCGCTCGCC          |       |       |       |                                    |                                             |
| 44458                                                 | 44494 | 35836 | 45897 | CDS product large tegument protein | 44458-44494 6:03:01                         |
| CCGTCTCGGCCGCCGACGTTCTATCCCGGGCTCGCC                  |       |       |       |                                    |                                             |
| 44516                                                 | 44552 | 35836 | 45897 | CDS product large tegument protein | 44516-44552 8:05:02                         |
| CCTCCACCCGGCCCCGATCCCCCTGCCAGACTCGCCC                 |       |       |       |                                    |                                             |
| 44729                                                 | 44747 | 35836 | 45897 | CDS product large tegument protein | 44729-44747 4:01:01 CCCTCCTCCGGGACGACCC     |
| 44766                                                 | 44797 | 35836 | 45897 | CDS product large tegument protein | 44766-44797 6:03:01                         |

|                                                                |       |       |       |                                             |                                              |
|----------------------------------------------------------------|-------|-------|-------|---------------------------------------------|----------------------------------------------|
| CCTCAGCCTGGTAAACCGCCAGTTCCGGTCC                                |       |       |       |                                             |                                              |
| 44831                                                          | 44893 | 35836 | 45897 | CDS product large tegument protein          | 44831-44893 11:08:02                         |
| GGCAGCGGCTGATGGGCCGGCGAAGAAGGGTAAGGGTGGTGCTCCGGATAAGAAGCGGCCGG |       |       |       |                                             |                                              |
| 45038                                                          | 45066 | 35836 | 45897 | CDS product large tegument protein          | 45038-45066 6:03:01                          |
| GGAGGCCGCGGACGGCCCCGGCCGCGAGG                                  |       |       |       |                                             |                                              |
| 45083                                                          | 45099 | 35836 | 45897 | CDS product large tegument protein          | 45083-45099 5:02:01 GGAGGAGGAAGGAGGGG        |
| 45100                                                          | 45129 | 35836 | 45897 | CDS product large tegument protein          | 45100-45129 6:03:01                          |
| CCACCACCGCAACTGCCGCGCCCCGGCGCC                                 |       |       |       |                                             |                                              |
| 45182                                                          | 45231 | 35836 | 45897 | CDS product large tegument protein          | 45182-45231 11:08:02                         |
| CCCCCGAGAACCGCCCTCTCCGCCGCTGCGTCGCCGCTGCGCGCCCC                |       |       |       |                                             |                                              |
| 45264                                                          | 45285 | 35836 | 45897 | CDS product large tegument protein          | 45264-45285 4:01:01 CCGTGCTTCCGCAGCCCCCTCC   |
| 45292                                                          | 45316 | 35836 | 45897 | CDS product large tegument protein          | 45292-45316 5:02:01 GGACGGCGCCGGCGCCGGCGCCGG |
| 45359                                                          | 45378 | 35836 | 45897 | CDS product large tegument protein          | 45359-45378 5:02:01 CCCGCCCCGCGCCCCCGGCC     |
| 45400                                                          | 45436 | 35836 | 45897 | CDS product large tegument protein          | 45400-45436 7:04:01                          |
| CCGAAGACCTGGAGGACCTTCCGCTGTCCCCCGAGCC                          |       |       |       |                                             |                                              |
| 45652                                                          | 45675 | 35836 | 45897 | CDS product large tegument protein          | 45652-45675 5:02:01 GGCGGCCCTCGCGGGCGAAGTGG  |
| 46314                                                          | 46344 | 46036 | 46404 | CDS product small capsid protein            | 46314-46344 7:04:01                          |
| GGTCGCCCCGATGGTGGTGGGGTCGGACGGG                                |       |       |       |                                             |                                              |
| 46510                                                          | 46527 | 46500 | 47330 | CDS product nuclear egress membrane protein | 46510-46527 5:02:01 GGCGGGGAGAAGGGCGG        |
| 46568                                                          | 46596 | 46500 | 47330 | CDS product nuclear egress membrane protein | 46568-46596 6:03:01                          |
| GGCCATCAGGCGCCACGGGCGCGGGCGG                                   |       |       |       |                                             |                                              |
| 46708                                                          | 46738 | 46500 | 47330 | CDS product nuclear egress membrane protein | 46708-46738 5:02:01                          |
| GGGGCCCGAGGTCTCGGGCGGTGCGCCGG                                  |       |       |       |                                             |                                              |

|                                        |       |       |       |                                             |                                             |
|----------------------------------------|-------|-------|-------|---------------------------------------------|---------------------------------------------|
| 46912                                  | 46924 | 46500 | 47330 | CDS product nuclear egress membrane protein | 46912-46924 4:01:01 CCAGCCCGCCGCC           |
| 46964                                  | 46982 | 46500 | 47330 | CDS product nuclear egress membrane protein | 46964-46982 4:01:01 GGCCTGGGTCGACCGGAGG     |
| 47000                                  | 47022 | 46500 | 47330 | CDS product nuclear egress membrane protein | 47000-47022 4:01:01                         |
| GGACGTGATGGGCGCTGCGGCGG                |       |       |       |                                             |                                             |
| 47077                                  | 47101 | 46500 | 47330 | CDS product nuclear egress membrane protein | 47077-47101 4:01:01                         |
| GGATTCGGACGTACGGGTCGCACGG              |       |       |       |                                             |                                             |
| 47198                                  | 47213 | 46500 | 47330 | CDS product nuclear egress membrane protein | 47198-47213 5:02:01 GGGGAGGTGGCGGGGG        |
| 47544                                  | 47574 | 47542 | 47922 | CDS product DNA packaging protein UL33      | 47544-47574 6:03:01                         |
| GGCATCGTGGAGGATCTGGTGCAGGTCGAGG        |       |       |       |                                             |                                             |
| 47603                                  | 47625 | 47542 | 47922 | CDS product DNA packaging protein UL33      | 47603-47625 5:02:01 CCTTGC GCGCTCCAGGGCCGCC |
| 47807                                  | 47827 | 47542 | 47922 | CDS product DNA packaging protein UL33      | 47807-47827 4:01:01 GGTCGCCGGGGCGGTACTTGG   |
| 47922                                  | 47959 | 47921 | 49786 | CDS product DNA packaging protein UL32      | 47922-47959 9:06:02                         |
| GGCCTCTGGCGCGGGGGCGGGTGGGCGCCGGGGG     |       |       |       |                                             |                                             |
| 48088                                  | 48126 | 47921 | 49786 | CDS product DNA packaging protein UL32      | 48088-48126 7:04:01                         |
| GGCGACGGGAGGACGGGGACGCGGATGAAGCGGGCGGG |       |       |       |                                             |                                             |
| 48152                                  | 48172 | 47921 | 49786 | CDS product DNA packaging protein UL32      | 48152-48172 4:01:01 CCGTGGCCGACTCCCTGGCCC   |
| 48269                                  | 48290 | 47921 | 49786 | CDS product DNA packaging protein UL32      | 48269-48290 4:01:01 CCAAGTGCCTGGCAGCCCCGCC  |
| 48466                                  | 48497 | 47921 | 49786 | CDS product DNA packaging protein UL32      | 48466-48497 6:03:01                         |
| CCGCGAGGCCCGCCCGCGCGCCGCGGCGCC         |       |       |       |                                             |                                             |
| 48536                                  | 48564 | 47921 | 49786 | CDS product DNA packaging protein UL32      | 48536-48564 5:02:01                         |
| CCAATACTCCTTCCTGGTCCAGTCATCC           |       |       |       |                                             |                                             |
| 48603                                  | 48620 | 47921 | 49786 | CDS product DNA packaging protein UL32      | 48603-48620 5:02:01 GGCGGAGGCGGCGTCGGG      |
| 48647                                  | 48664 | 47921 | 49786 | CDS product DNA packaging protein UL32      | 48647-48664 4:01:01 GGGAGCAGGGCGGCGCGG      |

|                                                        |       |       |       |                                        |             |                                |
|--------------------------------------------------------|-------|-------|-------|----------------------------------------|-------------|--------------------------------|
| 48665                                                  | 48717 | 47921 | 49786 | CDS product DNA packaging protein UL32 | 48665-48717 | 9:06:02                        |
| CCGCCGCTGGAGCCGCGCTGGCCCAGCCCCGCGCCAGCAGTCCCTCGGGCC    |       |       |       |                                        |             |                                |
| 48753                                                  | 48788 | 47921 | 49786 | CDS product DNA packaging protein UL32 | 48753-48788 | 6:03:01                        |
| GGACTGCTCGGGCCCGAGCTGCGGCGCGCCGGGG                     |       |       |       |                                        |             |                                |
| 48855                                                  | 48882 | 47921 | 49786 | CDS product DNA packaging protein UL32 | 48855-48882 | 6:03:01                        |
| GGCCAAGGCCGAGGGCGGGACGGGGG                             |       |       |       |                                        |             |                                |
| 48894                                                  | 48925 | 47921 | 49786 | CDS product DNA packaging protein UL32 | 48894-48925 | 6:03:01                        |
| GGCGCGCGGACATGGGGCTACGCGGACCTGG                        |       |       |       |                                        |             |                                |
| 48948                                                  | 48972 | 47921 | 49786 | CDS product DNA packaging protein UL32 | 48948-48972 | 5:02:01                        |
| GGCCACGTGGGAGGACGGAGAAAGG                              |       |       |       |                                        |             |                                |
| 49067                                                  | 49101 | 47921 | 49786 | CDS product DNA packaging protein UL32 | 49067-49101 | 6:03:01                        |
| CCCGGTTTGCCGAGCCCGACGCCGAGCCCGACGCC                    |       |       |       |                                        |             |                                |
| 49110                                                  | 49128 | 47921 | 49786 | CDS product DNA packaging protein UL32 | 49110-49128 | 4:01:01 CCCTGTCCTAGCGACCACC    |
| 49290                                                  | 49345 | 47921 | 49786 | CDS product DNA packaging protein UL32 | 49290-49345 | 11:08:02                       |
| GGAGGCGCTGGCCGCCGCGAGGGCAGGGAAGGGCTGAGGCGGCGCGGACCGAGG |       |       |       |                                        |             |                                |
| 49359                                                  | 49375 | 47921 | 49786 | CDS product DNA packaging protein UL32 | 49359-49375 | 4:01:01 GGATAGAGGGGCGGAGG      |
| 49386                                                  | 49407 | 47921 | 49786 | CDS product DNA packaging protein UL32 | 49386-49407 | 4:01:01 GGGCGATGGGCTCAGCGGCCGG |
| 49449                                                  | 49462 | 47921 | 49786 | CDS product DNA packaging protein UL32 | 49449-49462 | 4:01:01 GGCTGGGACGGAGG         |
| 49512                                                  | 49531 | 47921 | 49786 | CDS product DNA packaging protein UL32 | 49512-49531 | 4:01:01 CCACACCAACCCCGGTGTCC   |
| 49540                                                  | 49562 | 47921 | 49786 | CDS product DNA packaging protein UL32 | 49540-49562 | 6:03:01 CCGCCGGGCCCGCCCGGAGCC  |
| 49674                                                  | 49698 | 47921 | 49786 | CDS product DNA packaging protein UL32 | 49674-49698 | 5:02:01                        |
| CCCCCCAAGCCAACCGCAGGAGCC                               |       |       |       |                                        |             |                                |
| 49715                                                  | 49745 | 47921 | 49786 | CDS product DNA packaging protein UL32 | 49715-49745 | 6:03:01                        |

|                                             |       |       |       |                                              |                     |
|---------------------------------------------|-------|-------|-------|----------------------------------------------|---------------------|
| CCGGCCTGCTGCTCCGGCGCCACAACCTCCC             |       |       |       |                                              |                     |
| 49801                                       | 49828 | 49779 | 50774 | CDS product nuclear egress lamina protein    | 49801-49828 6:03:01 |
| CCGCCGGGCCACGCCCGAGCCGACCCC                 |       |       |       |                                              |                     |
| 49924                                       | 49945 | 49779 | 50774 | CDS product nuclear egress lamina protein    | 49924-49945 4:01:01 |
| CCGCGCGCGCCTCGGCTCCGCC                      |       |       |       |                                              |                     |
| 50088                                       | 50131 | 49779 | 50774 | CDS product nuclear egress lamina protein    | 50088-50131 8:05:02 |
| CCGCGCCCGTGACCCTCCCCTTTGACCTACCCAGACCGTGGCC |       |       |       |                                              |                     |
| 50988                                       | 51007 | 50698 | 54363 | CDS product DNA polymerase catalytic subunit | 50988-51007 4:01:01 |
| GGGGTCCTCGGCCAGGTCGG                        |       |       |       |                                              |                     |
| 51048                                       | 51069 | 50698 | 54363 | CDS product DNA polymerase catalytic subunit | 51048-51069 6:03:01 |
| GGAGGGGGGCTGGGGCGGGGG                       |       |       |       |                                              |                     |
| 51386                                       | 51417 | 50698 | 54363 | CDS product DNA polymerase catalytic subunit | 51386-51417 6:03:01 |
| CCGTCGCTTCGCGCGGCCGCGGCCACGGCC              |       |       |       |                                              |                     |
| 51428                                       | 51447 | 50698 | 54363 | CDS product DNA polymerase catalytic subunit | 51428-51447 4:01:01 |
| GGAGCAGGTCCACCAGGTGG                        |       |       |       |                                              |                     |
| 51883                                       | 51912 | 50698 | 54363 | CDS product DNA polymerase catalytic subunit | 51883-51912 5:02:01 |
| CCGTTGGCCACGCCCCGTAACCGTACACC               |       |       |       |                                              |                     |
| 51923                                       | 51939 | 50698 | 54363 | CDS product DNA polymerase catalytic subunit | 51923-51939 4:01:01 |
| CCACCTTGATGGCCGCC                           |       |       |       |                                              |                     |
| 51950                                       | 51966 | 50698 | 54363 | CDS product DNA polymerase catalytic subunit | 51950-51966 4:01:01 |
| CCAGCAGCACCGCCTCC                           |       |       |       |                                              |                     |
| 51969                                       | 52000 | 50698 | 54363 | CDS product DNA polymerase catalytic subunit | 51969-52000 6:03:01 |
| GGGGTGCTGGAGGGAATGCGGGCCCGCACGG             |       |       |       |                                              |                     |

|                                             |       |       |       |                                              |                                    |
|---------------------------------------------|-------|-------|-------|----------------------------------------------|------------------------------------|
| 52125                                       | 52152 | 50698 | 54363 | CDS product DNA polymerase catalytic subunit | 52125-52152 7:04:01                |
| CCCGGCCACGTCCGCCGCTCCGCGGCC                 |       |       |       |                                              |                                    |
| 52211                                       | 52224 | 50698 | 54363 | CDS product DNA polymerase catalytic subunit | 52211-52224 4:01:01 CCAGCACCACCACC |
| 52293                                       | 52306 | 50698 | 54363 | CDS product DNA polymerase catalytic subunit | 52293-52306 4:01:01 GGCCCGGGAGGCGG |
| 52334                                       | 52352 | 50698 | 54363 | CDS product DNA polymerase catalytic subunit | 52334-52352 4:01:01                |
| CCCCGCCGCCCTCGCTCCC                         |       |       |       |                                              |                                    |
| 52364                                       | 52380 | 50698 | 54363 | CDS product DNA polymerase catalytic subunit | 52364-52380 4:01:01                |
| CCGAACCCTCCCGCTCC                           |       |       |       |                                              |                                    |
| 52389                                       | 52415 | 50698 | 54363 | CDS product DNA polymerase catalytic subunit | 52389-52415 5:02:01                |
| GGCCTCGGCGTCGAGTCTCCGGCGG                   |       |       |       |                                              |                                    |
| 52406                                       | 52450 | 50698 | 54363 | CDS product DNA polymerase catalytic subunit | 52406-52450 9:06:02                |
| CCTCCGGCGGCGCCGATCCTCGTCCGCCCGCCAAACCGGCGCC |       |       |       |                                              |                                    |
| 52445                                       | 52464 | 50698 | 54363 | CDS product DNA polymerase catalytic subunit | 52445-52464 4:01:01                |
| GGCGCCGGTTGTCGGGGAGG                        |       |       |       |                                              |                                    |
| 52556                                       | 52581 | 50698 | 54363 | CDS product DNA polymerase catalytic subunit | 52556-52581 5:02:01                |
| CCAGCCTGGCCACGGCCGAGAGTCC                   |       |       |       |                                              |                                    |
| 52583                                       | 52593 | 50698 | 54363 | CDS product DNA polymerase catalytic subunit | 52583-52593 4:01:01 GGTGGGGGAGG    |
| 52612                                       | 52629 | 50698 | 54363 | CDS product DNA polymerase catalytic subunit | 52612-52629 4:01:01                |
| CCCACCAGCCGGGAGTCC                          |       |       |       |                                              |                                    |
| 52721                                       | 52749 | 50698 | 54363 | CDS product DNA polymerase catalytic subunit | 52721-52749 5:02:01                |
| CCTTGAGCACCTCGCCACACGGCGTCC                 |       |       |       |                                              |                                    |
| 52897                                       | 52919 | 50698 | 54363 | CDS product DNA polymerase catalytic subunit | 52897-52919 5:02:01                |
| CCGTAGCCGTCCAGCCGGAGGCC                     |       |       |       |                                              |                                    |

|                                |       |       |       |                                                 |                                    |
|--------------------------------|-------|-------|-------|-------------------------------------------------|------------------------------------|
| 52980                          | 52996 | 50698 | 54363 | CDS product DNA polymerase catalytic subunit    | 52980-52996 4:01:01                |
| GGTGGCGAACTCGGGG               |       |       |       |                                                 |                                    |
| 53009                          | 53031 | 50698 | 54363 | CDS product DNA polymerase catalytic subunit    | 53009-53031 5:02:01                |
| GGAAGGTGAGGAAGGCGAGAAG         |       |       |       |                                                 |                                    |
| 53358                          | 53378 | 50698 | 54363 | CDS product DNA polymerase catalytic subunit    | 53358-53378 4:01:01                |
| GGTCGCGTGGCGGTCAACCGG          |       |       |       |                                                 |                                    |
| 53403                          | 53421 | 50698 | 54363 | CDS product DNA polymerase catalytic subunit    | 53403-53421 4:01:01                |
| GGGGCCGGGGCGCAGGCGG            |       |       |       |                                                 |                                    |
| 53650                          | 53681 | 50698 | 54363 | CDS product DNA polymerase catalytic subunit    | 53650-53681 9:06:02                |
| CCGCCCCACCAGCCCCCGCGCCCCCTCGCC |       |       |       |                                                 |                                    |
| 53684                          | 53706 | 50698 | 54363 | CDS product DNA polymerase catalytic subunit    | 53684-53706 6:03:01                |
| GGCGATCGGCGGGGTGGAGGGG         |       |       |       |                                                 |                                    |
| 53954                          | 53967 | 50698 | 54363 | CDS product DNA polymerase catalytic subunit    | 53954-53967 4:01:01 CCACCGTCTCCACC |
| 54013                          | 54027 | 50698 | 54363 | CDS product DNA polymerase catalytic subunit    | 54013-54027 4:01:01 GGCCGAAGGCCCGG |
| 54015                          | 54034 | 50698 | 54363 | CDS product DNA polymerase catalytic subunit    | 54015-54034 4:01:01                |
| CCGGAAGGCCCGCCGTTC             |       |       |       |                                                 |                                    |
| 54044                          | 54066 | 50698 | 54363 | CDS product DNA polymerase catalytic subunit    | 54044-54066 4:01:01                |
| CCCGGCGGGGCCAGCAGCCCTCC        |       |       |       |                                                 |                                    |
| 54149                          | 54169 | 50698 | 54363 | CDS product DNA polymerase catalytic subunit    | 54149-54169 7:04:01                |
| GGCGGCGGTTCGGTGGGGCGG          |       |       |       |                                                 |                                    |
| 54225                          | 54246 | 50698 | 54363 | CDS product DNA polymerase catalytic subunit    | 54225-54246 5:02:01                |
| GGAGTGGGGCGGGGCGCGGG           |       |       |       |                                                 |                                    |
| 54690                          | 54725 | 54684 | 58328 | CDS product single-stranded DNA-binding protein | 54690-54725 7:04:01                |

|                                                  |       |       |       |                                                 |                                     |
|--------------------------------------------------|-------|-------|-------|-------------------------------------------------|-------------------------------------|
| CCGCACCCAAAACCGTCAGCCTCCCAGCGGCCCCC              |       |       |       |                                                 |                                     |
| 54895                                            | 54913 | 54684 | 58328 | CDS product single-stranded DNA-binding protein | 54895-54913 4:01:01                 |
| GGGACTCGGCGGCAGCGGG                              |       |       |       |                                                 |                                     |
| 54932                                            | 54948 | 54684 | 58328 | CDS product single-stranded DNA-binding protein | 54932-54948 4:01:01                 |
| CCCAGCCACTACCACCC                                |       |       |       |                                                 |                                     |
| 54975                                            | 54988 | 54684 | 58328 | CDS product single-stranded DNA-binding protein | 54975-54988 4:01:01 CCGCCATCCGAGCC  |
| 54999                                            | 55030 | 54684 | 58328 | CDS product single-stranded DNA-binding protein | 54999-55030 7:04:01                 |
| CCCCAACCTATCCCGGCCTGCGACGCCGCC                   |       |       |       |                                                 |                                     |
| 55032                                            | 55052 | 54684 | 58328 | CDS product single-stranded DNA-binding protein | 55032-55052 4:01:01                 |
| GGAAGCGGTTTGGCTTCTCGG                            |       |       |       |                                                 |                                     |
| 55208                                            | 55223 | 54684 | 58328 | CDS product single-stranded DNA-binding protein | 55208-55223 4:01:01 GGCGGCGCGGCACGG |
| 55310                                            | 55333 | 54684 | 58328 | CDS product single-stranded DNA-binding protein | 55310-55333 4:01:01                 |
| CCCTTCAACGCCAAGCACCGCTCC                         |       |       |       |                                                 |                                     |
| 55552                                            | 55601 | 54684 | 58328 | CDS product single-stranded DNA-binding protein | 55552-55601 9:06:02                 |
| GGGCAGGGGCGGCGCCGCGGGCCCCAGCGGGGCGGGACGGCACCTCGG |       |       |       |                                                 |                                     |
| 55596                                            | 55615 | 54684 | 58328 | CDS product single-stranded DNA-binding protein | 55596-55615 4:01:01                 |
| CCTCGGCAAGAGCACCCCC                              |       |       |       |                                                 |                                     |
| 55622                                            | 55664 | 54684 | 58328 | CDS product single-stranded DNA-binding protein | 55622-55664 9:06:02                 |
| GGGACGGAGCGGCGCCTGGCCTCGGTGATGGCGGCGGACACGG      |       |       |       |                                                 |                                     |
| 55687                                            | 55697 | 54684 | 58328 | CDS product single-stranded DNA-binding protein | 55687-55697 4:01:01 GGGGGCGGGG      |
| 55768                                            | 55781 | 54684 | 58328 | CDS product single-stranded DNA-binding protein | 55768-55781 4:01:01 GGAGGCGCTGGGG   |
| 55794                                            | 55820 | 54684 | 58328 | CDS product single-stranded DNA-binding protein | 55794-55820 5:02:01                 |
| GGGTCTCGGCCTGGTAGGGGCCATGG                       |       |       |       |                                                 |                                     |



|                                              |       |       |       |                                                 |             |                         |
|----------------------------------------------|-------|-------|-------|-------------------------------------------------|-------------|-------------------------|
| 55852                                        | 55869 | 54684 | 58328 | CDS product single-stranded DNA-binding protein | 55852-55869 | 5:02:01                 |
| GGAGGTGGACGACGGCGG                           |       |       |       |                                                 |             |                         |
| 55897                                        | 55919 | 54684 | 58328 | CDS product single-stranded DNA-binding protein | 55897-55919 | 4:01:01                 |
| CCCCTCATACCACGCTTCTACC                       |       |       |       |                                                 |             |                         |
| 56116                                        | 56130 | 54684 | 58328 | CDS product single-stranded DNA-binding protein | 56116-56130 | 4:01:01 GGGGGCCTTTGGCGG |
| 56154                                        | 56183 | 54684 | 58328 | CDS product single-stranded DNA-binding protein | 56154-56183 | 6:03:01                 |
| GGTATCTGGCCGGTACGCTGGAGTCGGAGG               |       |       |       |                                                 |             |                         |
| 56186                                        | 56218 | 54684 | 58328 | CDS product single-stranded DNA-binding protein | 56186-56218 | 5:02:01                 |
| CCCTGCGGCCTTTGCGACCGAACCACGCGCCCC            |       |       |       |                                                 |             |                         |
| 56242                                        | 56252 | 54684 | 58328 | CDS product single-stranded DNA-binding protein | 56242-56252 | 4:01:01 CCGCCTCCGCC     |
| 56452                                        | 56471 | 54684 | 58328 | CDS product single-stranded DNA-binding protein | 56452-56471 | 5:02:01                 |
| GGAGCAGGCCAGGCTGGTGG                         |       |       |       |                                                 |             |                         |
| 56491                                        | 56517 | 54684 | 58328 | CDS product single-stranded DNA-binding protein | 56491-56517 | 5:02:01                 |
| GGCCGGCGTCGGCCCCGGCGCAGCGGG                  |       |       |       |                                                 |             |                         |
| 56566                                        | 56585 | 54684 | 58328 | CDS product single-stranded DNA-binding protein | 56566-56585 | 4:01:01                 |
| GGAGACGGTGGAGCAAGCGG                         |       |       |       |                                                 |             |                         |
| 56828                                        | 56849 | 54684 | 58328 | CDS product single-stranded DNA-binding protein | 56828-56849 | 5:02:01                 |
| CCAGTGCTCCGCCGCCGCTTCC                       |       |       |       |                                                 |             |                         |
| 56878                                        | 56921 | 54684 | 58328 | CDS product single-stranded DNA-binding protein | 56878-56921 | 9:06:02                 |
| GGCCAAGACGGTGACGGTGACGGTGGCCGAGTCGGGGGTGGTGG |       |       |       |                                                 |             |                         |
| 56924                                        | 56959 | 54684 | 58328 | CDS product single-stranded DNA-binding protein | 56924-56959 | 7:04:01                 |
| CCTGACCTGACGCTCCCCGCCACGGAGCCCCCACC          |       |       |       |                                                 |             |                         |
| 57061                                        | 57092 | 54684 | 58328 | CDS product single-stranded DNA-binding protein | 57061-57092 | 7:04:01                 |

GGAGGCGGCCAAGGCGCGCTGGCCGGGATGG

|                                |       |       |       |                                                 |                     |
|--------------------------------|-------|-------|-------|-------------------------------------------------|---------------------|
| 57084                          | 57112 | 54684 | 58328 | CDS product single-stranded DNA-binding protein | 57084-57112 6:03:01 |
| CCGGGATGGCCAGCGCCTACCGCCGCCCC  |       |       |       |                                                 |                     |
| 57181                          | 57198 | 54684 | 58328 | CDS product single-stranded DNA-binding protein | 57181-57198 4:01:01 |
| CCCCAAGGGCCACCCTCC             |       |       |       |                                                 |                     |
| 57437                          | 57459 | 54684 | 58328 | CDS product single-stranded DNA-binding protein | 57437-57459 4:01:01 |
| GGCCTCACGGCCATTGTGGTGGG        |       |       |       |                                                 |                     |
| 57462                          | 57484 | 54684 | 58328 | CDS product single-stranded DNA-binding protein | 57462-57484 4:01:01 |
| CCAAACGGCCCCGCGACCCGGCC        |       |       |       |                                                 |                     |
| 57481                          | 57508 | 54684 | 58328 | CDS product single-stranded DNA-binding protein | 57481-57508 5:02:01 |
| GGCCTCGGTGCTGGCCTGGATCGACAGG   |       |       |       |                                                 |                     |
| 57517                          | 57539 | 54684 | 58328 | CDS product single-stranded DNA-binding protein | 57517-57539 5:02:01 |
| GGGTCAGGCGGACGTGGAGCCGG        |       |       |       |                                                 |                     |
| 57706                          | 57735 | 54684 | 58328 | CDS product single-stranded DNA-binding protein | 57706-57735 6:03:01 |
| GGCGGGCAACTGGAACGGCCTGAACGGCGG |       |       |       |                                                 |                     |
| 57817                          | 57845 | 54684 | 58328 | CDS product single-stranded DNA-binding protein | 57817-57845 6:03:01 |
| GGCCGGCGGCTTTGGCGCCGGCGTGCGGG  |       |       |       |                                                 |                     |
| 57865                          | 57891 | 54684 | 58328 | CDS product single-stranded DNA-binding protein | 57865-57891 6:03:01 |
| GGTGCGTGGCATAGTGGCGGAGGGCGG    |       |       |       |                                                 |                     |
| 57940                          | 57961 | 54684 | 58328 | CDS product single-stranded DNA-binding protein | 57940-57961 5:02:01 |
| CCCCCGCACCCAGCACCTGGCC         |       |       |       |                                                 |                     |
| 57972                          | 57989 | 54684 | 58328 | CDS product single-stranded DNA-binding protein | 57972-57989 5:02:01 |
| GGGTCGGGCTGGTGGAGG             |       |       |       |                                                 |                     |

|                                          |       |       |       |                                                 |                                      |
|------------------------------------------|-------|-------|-------|-------------------------------------------------|--------------------------------------|
| 58002                                    | 58027 | 54684 | 58328 | CDS product single-stranded DNA-binding protein | 58002-58027 4:01:01                  |
| CCGTCAGCCTGGATGCCATCAACGCC               |       |       |       |                                                 |                                      |
| 58046                                    | 58079 | 54684 | 58328 | CDS product single-stranded DNA-binding protein | 58046-58079 7:04:01                  |
| GGCGAGTGGACCGTGGAGGCGGCGCAGGAGCTGG       |       |       |       |                                                 |                                      |
| 58171                                    | 58192 | 54684 | 58328 | CDS product single-stranded DNA-binding protein | 58171-58192 5:02:01                  |
| GGCGGCCGGACCCGGGTTTGGG                   |       |       |       |                                                 |                                      |
| 58223                                    | 58240 | 54684 | 58328 | CDS product single-stranded DNA-binding protein | 58223-58240 4:01:01                  |
| GGCGTCGGCGGCGCCGGG                       |       |       |       |                                                 |                                      |
| 58445                                    | 58485 | 58444 | 60738 | CDS product DNA packaging terminase subunit 2   | 58445-58485 8:05:02                  |
| GGAGCGGAGGAGGGCGCCGGAACGATCGGGAGGGCGCAGG |       |       |       |                                                 |                                      |
| 58502                                    | 58524 | 58444 | 60738 | CDS product DNA packaging terminase subunit 2   | 58502-58524 5:02:01                  |
| GGCGGTCTTCGGGCAGGTGCAGG                  |       |       |       |                                                 |                                      |
| 58627                                    | 58642 | 58444 | 60738 | CDS product DNA packaging terminase subunit 2   | 58627-58642 4:01:01 GGCGGAAGCTGGCGGG |
| 58664                                    | 58685 | 58444 | 60738 | CDS product DNA packaging terminase subunit 2   | 58664-58685 4:01:01                  |
| CCGACACCAGACGCCGCTCGCC                   |       |       |       |                                                 |                                      |
| 58702                                    | 58721 | 58444 | 60738 | CDS product DNA packaging terminase subunit 2   | 58702-58721 4:01:01                  |
| CCATGGCCTACGCCGAGGCC                     |       |       |       |                                                 |                                      |
| 58718                                    | 58743 | 58444 | 60738 | CDS product DNA packaging terminase subunit 2   | 58718-58743 5:02:01                  |
| GGCCGAGGGGAGCGGGTGCTCAAGG                |       |       |       |                                                 |                                      |
| 58988                                    | 59007 | 58444 | 60738 | CDS product DNA packaging terminase subunit 2   | 58988-59007 4:01:01                  |
| GGCGGGAAGCGGCCTCGTGG                     |       |       |       |                                                 |                                      |
| 59072                                    | 59110 | 58444 | 60738 | CDS product DNA packaging terminase subunit 2   | 59072-59110 8:05:02                  |
| GGCCAACCAGGGGAGGCGGTGCACCGGCGGCTGCTGGG   |       |       |       |                                                 |                                      |

|                                      |       |       |       |                                               |                                      |
|--------------------------------------|-------|-------|-------|-----------------------------------------------|--------------------------------------|
| 59134                                | 59169 | 58444 | 60738 | CDS product DNA packaging terminase subunit 2 | 59134-59169 8:05:02                  |
| GGCAGGCGGCGGTGCGGGTGGCCGACGCGGACATGG |       |       |       |                                               |                                      |
| 59228                                | 59247 | 58444 | 60738 | CDS product DNA packaging terminase subunit 2 | 59228-59247 4:01:01                  |
| GGCGCTCCGGGCGCTGGAGG                 |       |       |       |                                               |                                      |
| 59252                                | 59279 | 58444 | 60738 | CDS product DNA packaging terminase subunit 2 | 59252-59279 5:02:01                  |
| CCGTGCACCCGGGCGCCCCCGGCGCCC          |       |       |       |                                               |                                      |
| 59389                                | 59421 | 58444 | 60738 | CDS product DNA packaging terminase subunit 2 | 59389-59421 6:03:01                  |
| GGCTGGCCTCGGCCGAGCGGGCGAGGGCGGGG     |       |       |       |                                               |                                      |
| 59449                                | 59472 | 58444 | 60738 | CDS product DNA packaging terminase subunit 2 | 59449-59472 4:01:01                  |
| CCAACCTGGAGACCCTGGGGCGCC             |       |       |       |                                               |                                      |
| 59486                                | 59501 | 58444 | 60738 | CDS product DNA packaging terminase subunit 2 | 59486-59501 4:01:01 CCACCTCCGAGCGGCC |
| 59548                                | 59577 | 58444 | 60738 | CDS product DNA packaging terminase subunit 2 | 59548-59577 5:02:01                  |
| GGGTCTTCGCGGACGGGCTGCTGGACCTGG       |       |       |       |                                               |                                      |
| 59660                                | 59677 | 58444 | 60738 | CDS product DNA packaging terminase subunit 2 | 59660-59677 4:01:01                  |
| CCACCACATGTCCGCACC                   |       |       |       |                                               |                                      |
| 59738                                | 59757 | 58444 | 60738 | CDS product DNA packaging terminase subunit 2 | 59738-59757 4:01:01                  |
| GGGGCGCGTAGGCATGGGGG                 |       |       |       |                                               |                                      |
| 60077                                | 60105 | 58444 | 60738 | CDS product DNA packaging terminase subunit 2 | 60077-60105 6:03:01                  |
| GGCGGTGGGGCGCGCCGAACGGTTGTGG         |       |       |       |                                               |                                      |
| 60124                                | 60141 | 58444 | 60738 | CDS product DNA packaging terminase subunit 2 | 60124-60141 4:01:01                  |
| CCGCCTTCGACTCCCACC                   |       |       |       |                                               |                                      |
| 60347                                | 60371 | 58444 | 60738 | CDS product DNA packaging terminase subunit 2 | 60347-60371 4:01:01                  |
| GGTGACAGCGGCCCGCGCGATTGG             |       |       |       |                                               |                                      |

|                                                      |       |       |       |                                               |             |          |
|------------------------------------------------------|-------|-------|-------|-----------------------------------------------|-------------|----------|
| 60424                                                | 60443 | 58444 | 60738 | CDS product DNA packaging terminase subunit 2 | 60424-60443 | 5:02:01  |
| CCGCCACCCAGCGCCTGGCC                                 |       |       |       |                                               |             |          |
| 60626                                                | 60653 | 58444 | 60738 | CDS product DNA packaging terminase subunit 2 | 60626-60653 | 6:03:01  |
| GGGCCCCGAGGGTACGGTCCGGGAGGGG                         |       |       |       |                                               |             |          |
| 60713                                                | 60747 | 60600 | 63581 | CDS product envelope glycoprotein B           | 60713-60747 | 5:02:01  |
| GGCTCCGGGGTCTGGGGCGAGCTAGGCGCCATCGG                  |       |       |       |                                               |             |          |
| 60751                                                | 60792 | 60600 | 63581 | CDS product envelope glycoprotein B           | 60751-60792 | 8:05:02  |
| CCGCTGCTCCCCGGGCGCCGTTGCCGGCGCCCGCCACCGCC            |       |       |       |                                               |             |          |
| 60835                                                | 60861 | 60600 | 63581 | CDS product envelope glycoprotein B           | 60835-60861 | 5:02:01  |
| 60864                                                | 60918 | 60600 | 63581 | CDS product envelope glycoprotein B           | 60864-60918 | 11:08:02 |
| CCACTCCGACGTCGCCCCGGCCACGCCAGCGCCCCACGACCCCTAGCCCGCC |       |       |       |                                               |             |          |
| 60930                                                | 60961 | 60600 | 63581 | CDS product envelope glycoprotein B           | 60930-60961 | 7:04:01  |
| CCTCCGAGCCGGCCGAACCGTCGCCGCTGCCC                     |       |       |       |                                               |             |          |
| 60965                                                | 60987 | 60600 | 63581 | CDS product envelope glycoprotein B           | 60965-60987 | 5:02:01  |
| 61006                                                | 61031 | 60600 | 63581 | CDS product envelope glycoprotein B           | 61006-61031 | 5:02:01  |
| 61062                                                | 61084 | 60600 | 63581 | CDS product envelope glycoprotein B           | 61062-61084 | 6:03:01  |
| 61096                                                | 61119 | 60600 | 63581 | CDS product envelope glycoprotein B           | 61096-61119 | 5:02:01  |
| 61260                                                | 61297 | 60600 | 63581 | CDS product envelope glycoprotein B           | 61260-61297 | 7:04:01  |
| CCATTACCAACCGCTACACCGACCGCGTGCCCGTCTCC               |       |       |       |                                               |             |          |
| 61341                                                | 61361 | 60600 | 63581 | CDS product envelope glycoprotein B           | 61341-61361 | 5:02:01  |
| 61393                                                | 61409 | 60600 | 63581 | CDS product envelope glycoprotein B           | 61393-61409 | 4:01:01  |
| 61417                                                | 61444 | 60600 | 63581 | CDS product envelope glycoprotein B           | 61417-61444 | 6:03:01  |
| 61543                                                | 61562 | 60600 | 63581 | CDS product envelope glycoprotein B           | 61543-61562 | 5:02:01  |
| GGAGGTGGACGCCCGGTCCG                                 |       |       |       |                                               |             |          |

|                                                       |       |       |       |                                     |
|-------------------------------------------------------|-------|-------|-------|-------------------------------------|
| 61774                                                 | 61789 | 60600 | 63581 | CDS product envelope glycoprotein B |
| 61885                                                 | 61903 | 60600 | 63581 | CDS product envelope glycoprotein B |
| 62033                                                 | 62054 | 60600 | 63581 | CDS product envelope glycoprotein B |
| 62073                                                 | 62092 | 60600 | 63581 | CDS product envelope glycoprotein B |
| 62133                                                 | 62152 | 60600 | 63581 | CDS product envelope glycoprotein B |
| 62232                                                 | 62257 | 60600 | 63581 | CDS product envelope glycoprotein B |
| 62281                                                 | 62317 | 60600 | 63581 | CDS product envelope glycoprotein B |
| CCTGCGCCGCGGGCCGCGGATGCCGCCACCCAGGCC                  |       |       |       |                                     |
| 62314                                                 | 62333 | 60600 | 63581 | CDS product envelope glycoprotein B |
| 62506                                                 | 62531 | 60600 | 63581 | CDS product envelope glycoprotein B |
| 62659                                                 | 62677 | 60600 | 63581 | CDS product envelope glycoprotein B |
| 63088                                                 | 63141 | 60600 | 63581 | CDS product envelope glycoprotein B |
| GGGCCTGGGCAAAGCGGGCCAGGCCATCGGCAAGCTGGTGATCGGGCCGCGGG |       |       |       |                                     |
| 63135                                                 | 63163 | 60600 | 63581 | CDS product envelope glycoprotein B |
| CCGCGGGCGCGTCTCTCCACCGTGTC                            |       |       |       |                                     |
| 63225                                                 | 63241 | 60600 | 63581 | CDS product envelope glycoprotein B |
| 63276                                                 | 63301 | 60600 | 63581 | CDS product envelope glycoprotein B |
| 63346                                                 | 63360 | 60600 | 63581 | CDS product envelope glycoprotein B |
| 63376                                                 | 63398 | 60600 | 63581 | CDS product envelope glycoprotein B |
| 63472                                                 | 63509 | 60600 | 63581 | CDS product envelope glycoprotein B |
| CCCCGCCCTAATCGCCAACCACGTCTCCAACCTCGCCC                |       |       |       |                                     |
| 63832                                                 | 63857 | 63814 | 64314 | CDS product protein V32             |
| 63854                                                 | 63870 | 63814 | 64314 | CDS product protein V32             |

|             |         |                            |
|-------------|---------|----------------------------|
| 61774-61789 | 4:01:01 | GGTCGGCTGGGACTGG           |
| 61885-61903 | 4:01:01 | CCGGGCCCTTTCCACGACC        |
| 62033-62054 | 4:01:01 | CCCATGGAAACCTACCTTGCCC     |
| 62073-62092 | 4:01:01 | CCTTCCGGCCCATGCTCTCC       |
| 62133-62152 | 4:01:01 | CCAACCGCACCTACGACCCC       |
| 62232-62257 | 5:02:01 | CCGAGGCCGTGCCCGCCGCGCAGCCC |
| 62281-62317 | 8:05:02 |                            |
|             |         |                            |
| 62314-62333 | 4:01:01 | GGCCGGCAAAGACGGCAAGG       |
| 62506-62531 | 4:01:01 | CCCCAGCGCCATCGCCTCGTCTTCCC |
| 62659-62677 | 4:01:01 | CCCCCGGTGACCTTCACC         |
| 63088-63141 | 8:05:02 |                            |
|             |         |                            |
| 63135-63163 | 5:02:01 |                            |
|             |         |                            |
| 63225-63241 | 4:01:01 | CCGGCCTCGTGGCCGCC          |
| 63276-63301 | 4:01:01 | CCAACCCCATGAAGGCCCTGTACCCC |
| 63346-63360 | 4:01:01 | GGCGGAGGCGACGG             |
| 63376-63398 | 4:01:01 | GGACAAGCTGGAGCAGGCCCGGG    |
| 63472-63509 | 7:04:01 |                            |
|             |         |                            |
| 63832-63857 | 6:03:01 | CCGCTCCCGCCGAGTCCCCCTGGCC  |
| 63854-63870 | 4:01:01 | GGCCGAGGAGGTTTCGG          |

|                                                  |       |       |       |                                     |
|--------------------------------------------------|-------|-------|-------|-------------------------------------|
| 63892                                            | 63911 | 63814 | 64314 | CDS product protein V32             |
| 63946                                            | 63974 | 63814 | 64314 | CDS product protein V32             |
| 63995                                            | 64020 | 63814 | 64314 | CDS product protein V32             |
| 64054                                            | 64083 | 63814 | 64314 | CDS product protein V32             |
| 64246                                            | 64268 | 63814 | 64314 | CDS product protein V32             |
| 64467                                            | 64503 | 64409 | 65437 | CDS product capsid scaffold protein |
| GGGTGGTGGCGGCGCTGGCATCGACGGTCTGGGTGGG            |       |       |       |                                     |
| 64555                                            | 64586 | 64409 | 65437 | CDS product capsid scaffold protein |
| GGGCCTCGCGGCTTCCGCGACGGCTGCTGGG                  |       |       |       |                                     |
| 64606                                            | 64635 | 64409 | 65437 | CDS product capsid scaffold protein |
| GGCTGGCGGCGGGCAGGGCTGGGAGTGGG                    |       |       |       |                                     |
| 64669                                            | 64684 | 64409 | 65437 | CDS product capsid scaffold protein |
| 64716                                            | 64734 | 64409 | 65437 | CDS product capsid scaffold protein |
| 64739                                            | 64763 | 64409 | 65437 | CDS product capsid scaffold protein |
| 64773                                            | 64821 | 64409 | 65437 | CDS product capsid scaffold protein |
| GGTGGCCCGCAAGGCGGTCCCCGGGTAAACGGCCGGCGCGCCGGCGGG |       |       |       |                                     |
| 64845                                            | 64862 | 64409 | 65437 | CDS product capsid scaffold protein |
| 64903                                            | 64929 | 64409 | 65437 | CDS product capsid scaffold protein |
| 65069                                            | 65094 | 64409 | 65437 | CDS product capsid scaffold protein |
| 65120                                            | 65138 | 64409 | 65437 | CDS product capsid scaffold protein |
| 65134                                            | 65150 | 64409 | 65437 | CDS product capsid scaffold protein |
| 65239                                            | 65281 | 64409 | 65437 | CDS product capsid scaffold protein |
| GGCCACTGCGGGCGCGTGCGGGCGGAGCGGGCGGTACGGGTGG      |       |       |       |                                     |

|             |         |                               |
|-------------|---------|-------------------------------|
| 63892-63911 | 4:01:01 | CCTCCGAAGCGCCCGCGGCC          |
| 63946-63974 | 5:02:01 | CCGGCGCTGCCAGCACCCCCGCGAGCGCC |
| 63995-64020 | 4:01:01 | GGACACCGAGGAGCTGCTGGAGATGG    |
| 64054-64083 | 5:02:01 | CCCCCAGCCGGCACAGCCCGCATTACCC  |
| 64246-64268 | 4:01:01 | CCCCGTGTGCCCCCTGGATGGCC       |
| 64467-64503 | 8:05:02 |                               |
| 64555-64586 | 5:02:01 |                               |
| 64606-64635 | 7:04:01 |                               |
| 64669-64684 | 4:01:01 | GGGCGGTGAGGATGG               |
| 64716-64734 | 4:01:01 | CCGACACGACCGCCTGCCC           |
| 64739-64763 | 5:02:01 | GGATACTGGGGGTAGACTGGCGGGG     |
| 64773-64821 | 9:06:02 |                               |
| 64845-64862 | 4:01:01 | GGACGGCCCGGAGCTGGG            |
| 64903-64929 | 5:02:01 | GGCTATGGTCGTCGAGGGGCGGTGGGG   |
| 65069-65094 | 6:03:01 | GGGGACGGGGGGTGGGCTGGCATGG     |
| 65120-65138 | 4:01:01 | CCGCCGCCCTTGCGGCC             |
| 65134-65150 | 4:01:01 | GGCCTGCGGTGCGCGG              |
| 65239-65281 | 7:04:01 |                               |

|                                       |       |       |       |                                                 |                     |                            |
|---------------------------------------|-------|-------|-------|-------------------------------------------------|---------------------|----------------------------|
| 65346                                 | 65371 | 64409 | 65437 | CDS product capsid scaffold protein             | 65346-65371 4:01:01 | GGTTGTACTGGGCCGTAGGAACGAGG |
| 65383                                 | 65409 | 64409 | 65437 | CDS product capsid scaffold protein             | 65383-65409 5:02:01 | GGAAACAAGGGGGTTCCCGGAGCCGG |
| 65418                                 | 65432 | 64409 | 65437 | CDS product capsid scaffold protein             | 65418-65432 4:01:01 | GGGAGCCGGAGGAGG            |
| 65445                                 | 65470 | 64409 | 66394 | CDS product capsid maturation protease          | 65445-65470 5:02:01 |                            |
| GGTGCTCGGGCGAGGGAGGTTGCGG             |       |       |       |                                                 |                     |                            |
| 65494                                 | 65522 | 64409 | 66394 | CDS product capsid maturation protease          | 65494-65522 6:03:01 |                            |
| GGGGGCGGAAGGCGTAGGCGCTAGAGGGG         |       |       |       |                                                 |                     |                            |
| 65600                                 | 65619 | 64409 | 66394 | CDS product capsid maturation protease          | 65600-65619 4:01:01 | CCTTCCCGCGACTCCGCCCC       |
| 65687                                 | 65714 | 64409 | 66394 | CDS product capsid maturation protease          | 65687-65714 6:03:01 |                            |
| CCCGCATGCCGGCCTCGCGCCGCCGCC           |       |       |       |                                                 |                     |                            |
| 65802                                 | 65820 | 64409 | 66394 | CDS product capsid maturation protease          | 65802-65820 4:01:01 | CCCACCGCGCGGCCTCCCC        |
| 65862                                 | 65885 | 64409 | 66394 | CDS product capsid maturation protease          | 65862-65885 5:02:01 | CCCGCACCCCGGCGCCAAGCGCC    |
| 65895                                 | 65905 | 64409 | 66394 | CDS product capsid maturation protease          | 65895-65905 4:01:01 | CCACCGCGGCC                |
| 66075                                 | 66108 | 64409 | 66394 | CDS product capsid maturation protease          | 66075-66108 5:02:01 |                            |
| CCGTCAGCCCCTCCCCGAGGTCCCCGAAAAATCC    |       |       |       |                                                 |                     |                            |
| 66244                                 | 66281 | 64409 | 66394 | CDS product capsid maturation protease          | 66244-66281 8:05:02 |                            |
| GGGGAGCTGGGAGCCGGCGGAAGGGCGGCCTCGACGG |       |       |       |                                                 |                     |                            |
| 66760                                 | 66783 | 66507 | 68294 | CDS product DNA packaging tegument protein UL25 | 66760-66783 5:02:01 |                            |
| GGCTGGCTTGGTGCCGCGCCGAGG              |       |       |       |                                                 |                     |                            |
| 66948                                 | 66971 | 66507 | 68294 | CDS product DNA packaging tegument protein UL25 | 66948-66971 5:02:01 |                            |
| CCACTCCGGCTGGCCATGGCCGCC              |       |       |       |                                                 |                     |                            |
| 66988                                 | 67015 | 66507 | 68294 | CDS product DNA packaging tegument protein UL25 | 66988-67015 4:01:01 |                            |
| CCCCGCGGCTCCCGCGCCAGCGCGCC            |       |       |       |                                                 |                     |                            |



|                                                                                |       |       |       |                                                 |             |                        |
|--------------------------------------------------------------------------------|-------|-------|-------|-------------------------------------------------|-------------|------------------------|
| 67189                                                                          | 67223 | 66507 | 68294 | CDS product DNA packaging tegument protein UL25 | 67189-67223 | 6:03:01                |
| CCAAAAACGCCGCCGCGCCCTGTAACTCGTCC                                               |       |       |       |                                                 |             |                        |
| 67246                                                                          | 67288 | 66507 | 68294 | CDS product DNA packaging tegument protein UL25 | 67246-67288 | 8:05:02                |
| CCAGCGCCGCACCCGCGCGCCGACCGGCGCCGAGGCTTCC                                       |       |       |       |                                                 |             |                        |
| 67274                                                                          | 67300 | 66507 | 68294 | CDS product DNA packaging tegument protein UL25 | 67274-67300 | 5:02:01                |
| GGCGCCGAGGCTTCCAGGAACGGGGG                                                     |       |       |       |                                                 |             |                        |
| 67364                                                                          | 67378 | 66507 | 68294 | CDS product DNA packaging tegument protein UL25 | 67364-67378 | 4:01:01 CCGCCCCCGTTTCC |
| 67393                                                                          | 67422 | 66507 | 68294 | CDS product DNA packaging tegument protein UL25 | 67393-67422 | 6:03:01                |
| GGTGCTTGGGAGGCGGGCGTGGTCGAAGG                                                  |       |       |       |                                                 |             |                        |
| 67436                                                                          | 67454 | 66507 | 68294 | CDS product DNA packaging tegument protein UL25 | 67436-67454 | 4:01:01                |
| CCCGGTGCCGCCCTCGCCC                                                            |       |       |       |                                                 |             |                        |
| 67460                                                                          | 67487 | 66507 | 68294 | CDS product DNA packaging tegument protein UL25 | 67460-67487 | 6:03:01                |
| GGCGGCGAGGGCGTCCAGGCAGCCGGG                                                    |       |       |       |                                                 |             |                        |
| 67518                                                                          | 67562 | 66507 | 68294 | CDS product DNA packaging tegument protein UL25 | 67518-67562 | 7:04:01                |
| GGGTACGACTGGCTAGGGGCCAGGAGCGGTGCGCAAGGTGCAGG                                   |       |       |       |                                                 |             |                        |
| 67658                                                                          | 67677 | 66507 | 68294 | CDS product DNA packaging tegument protein UL25 | 67658-67677 | 4:01:01                |
| CCGAGACATCCGCCCGTCCC                                                           |       |       |       |                                                 |             |                        |
| 67714                                                                          | 67796 | 66507 | 68294 | CDS product DNA packaging tegument protein UL25 | 67714-67796 | 14:11:03               |
| CCACCAAACGGTCTGCAGGGCCCGGTACCACGTTCCGAACACCACCCCGTTGGATCCCCCGCCGCCGCCACGAACACC |       |       |       |                                                 |             |                        |
| 67907                                                                          | 67930 | 66507 | 68294 | CDS product DNA packaging tegument protein UL25 | 67907-67930 | 6:03:01                |
| CCCGCCGCCCCGCAATTACCGCC                                                        |       |       |       |                                                 |             |                        |
| 67934                                                                          | 67956 | 66507 | 68294 | CDS product DNA packaging tegument protein UL25 | 67934-67956 | 6:03:01                |
| GGGGGGGAGGACGCGGCGTCGG                                                         |       |       |       |                                                 |             |                        |

|                                                               |       |       |       |                                                 |             |          |
|---------------------------------------------------------------|-------|-------|-------|-------------------------------------------------|-------------|----------|
| 67957                                                         | 67994 | 66507 | 68294 | CDS product DNA packaging tegument protein UL25 | 67957-67994 | 9:06:02  |
| CCTCTCCGCGGCCCGCGCGCTCTCCAGCGCCGCC                            |       |       |       |                                                 |             |          |
| 68008                                                         | 68027 | 66507 | 68294 | CDS product DNA packaging tegument protein UL25 | 68008-68027 | 5:02:01  |
| CCTTCGCCACCTGCCGCTCC                                          |       |       |       |                                                 |             |          |
| 68141                                                         | 68160 | 66507 | 68294 | CDS product DNA packaging tegument protein UL25 | 68141-68160 | 4:01:01  |
| GGCGCGGTGGGCATTGTCGG                                          |       |       |       |                                                 |             |          |
| 68161                                                         | 68187 | 66507 | 68294 | CDS product DNA packaging tegument protein UL25 | 68161-68187 | 5:02:01  |
| CCGAAAACGCGGGCCGCTCCAGTACC                                    |       |       |       |                                                 |             |          |
| 68390                                                         | 68415 | 68361 | 69104 | CDS product nuclear protein UL24                | 68390-68415 | 6:03:01  |
| 68416                                                         | 68452 | 68361 | 69104 | CDS product nuclear protein UL24                | 68416-68452 | 7:04:01  |
| CCGCGCCGCTCGGGCCAGCCGCCGCGCGCCGGAACC                          |       |       |       |                                                 |             |          |
| 68439                                                         | 68504 | 68361 | 69104 | CDS product nuclear protein UL24                | 68439-68504 | 14:11:03 |
| GGCGCGCCGGAACCGGGGCGGGGCTGGGGCTGGGGCCGCCGGCGAGAGCGGAGCCCGGCGG |       |       |       |                                                 |             |          |
| 68497                                                         | 68534 | 68361 | 69104 | CDS product nuclear protein UL24                | 68497-68534 | 6:03:01  |
| CCCGGCGGCCCTTTTCGGCCGCGCCGCCGGGCGGCC                          |       |       |       |                                                 |             |          |
| 68527                                                         | 68542 | 68361 | 69104 | CDS product nuclear protein UL24                | 68527-68542 | 4:01:01  |
| 68571                                                         | 68585 | 68361 | 69104 | CDS product nuclear protein UL24                | 68571-68585 | 4:01:01  |
| 68639                                                         | 68660 | 68361 | 69104 | CDS product nuclear protein UL24                | 68639-68660 | 4:01:01  |
| 68671                                                         | 68693 | 68361 | 69104 | CDS product nuclear protein UL24                | 68671-68693 | 5:02:01  |
| 68694                                                         | 68709 | 68361 | 69104 | CDS product nuclear protein UL24                | 68694-68709 | 4:01:01  |
| 68877                                                         | 68894 | 68361 | 69104 | CDS product nuclear protein UL24                | 68877-68894 | 4:01:01  |
| 68991                                                         | 69011 | 68361 | 69104 | CDS product nuclear protein UL24                | 68991-69011 | 5:02:01  |
| 69280                                                         | 69298 | 69148 | 70200 | CDS product thymidine kinase                    | 69280-69298 | 4:01:01  |

|                                                                                      |       |       |       |                                     |                      |                             |
|--------------------------------------------------------------------------------------|-------|-------|-------|-------------------------------------|----------------------|-----------------------------|
| 69385                                                                                | 69411 | 69148 | 70200 | CDS product thymidine kinase        | 69385-69411 6:03:01  | GGAAACGGGCCGGGGGGCTGACGGGGG |
| 69454                                                                                | 69474 | 69148 | 70200 | CDS product thymidine kinase        | 69454-69474 4:01:01  | CCACGCCCTACCTGCTGCTCC       |
| 69523                                                                                | 69543 | 69148 | 70200 | CDS product thymidine kinase        | 69523-69543 5:02:01  | CCGCCGCGCCCGACCTCGTCC       |
| 69625                                                                                | 69675 | 69148 | 70200 | CDS product thymidine kinase        | 69625-69675 11:08:02 |                             |
| CCCTGCTCGCCATGGCCGCCACCTCCCCCTGAAGCCCCGGGGCCAACC                                     |       |       |       |                                     |                      |                             |
| 69713                                                                                | 69732 | 69148 | 70200 | CDS product thymidine kinase        | 69713-69732 4:01:01  | CCGCCTGCGCGCCCCGCGCCC       |
| 69822                                                                                | 69848 | 69148 | 70200 | CDS product thymidine kinase        | 69822-69848 5:02:01  | GGGCGCGTCTGGCGGACGGCTGGGGG  |
| 69855                                                                                | 69876 | 69148 | 70200 | CDS product thymidine kinase        | 69855-69876 5:02:01  | CCCCCTTCACTGCCGCCCGCC       |
| 69971                                                                                | 69996 | 69148 | 70200 | CDS product thymidine kinase        | 69971-69996 5:02:01  | GGATGAGCGGGGGGTGCTCCTGGAGG  |
| 70072                                                                                | 70094 | 69148 | 70200 | CDS product thymidine kinase        | 70072-70094 5:02:01  | CCCCGCGCCAGTGCCCGCCGCC      |
| 70132                                                                                | 70155 | 69148 | 70200 | CDS product thymidine kinase        | 70132-70155 6:03:01  | CCGGGGCCGCCGAGCCGCCGCC      |
| 70515                                                                                | 70604 | 70439 | 73075 | CDS product envelope glycoprotein H | 70515-70604 16:13:04 |                             |
| CCCGGTTCCCACCCGGCGCCGCGTCTCCGTCGCGGCGACCCGTCCCCACAACGCCCCAACGACTCCGTCTCCCCCGCTGTTTCC |       |       |       |                                     |                      |                             |
| 70644                                                                                | 70663 | 70439 | 73075 | CDS product envelope glycoprotein H | 70644-70663 4:01:01  | GGAAGCCGGCTTCGGCTTGG        |
| 70842                                                                                | 70860 | 70439 | 73075 | CDS product envelope glycoprotein H | 70842-70860 4:01:01  | CCCCCGCCTAGGCGACCCC         |
| 71056                                                                                | 71079 | 70439 | 73075 | CDS product envelope glycoprotein H | 71056-71079 4:01:01  | CCAAAACCCTCGGGCCGCAAGACC    |
| 71133                                                                                | 71153 | 70439 | 73075 | CDS product envelope glycoprotein H | 71133-71153 4:01:01  | CCCTTTCGCTTCCGGGCCCC        |
| 71243                                                                                | 71260 | 70439 | 73075 | CDS product envelope glycoprotein H | 71243-71260 4:01:01  | CCGTCGCCACCATCGGCC          |
| 71288                                                                                | 71303 | 70439 | 73075 | CDS product envelope glycoprotein H | 71288-71303 4:01:01  | CCGTGAACCACCCCCC            |
| 71352                                                                                | 71368 | 70439 | 73075 | CDS product envelope glycoprotein H | 71352-71368 4:01:01  | CCGTCTCGCCCCCAGCC           |
| 71380                                                                                | 71404 | 70439 | 73075 | CDS product envelope glycoprotein H | 71380-71404 6:03:01  | CCCCCAGGGCTCCGGCCGGGCCCC    |
| 71466                                                                                | 71479 | 70439 | 73075 | CDS product envelope glycoprotein H | 71466-71479 4:01:01  | GGCCCGGGCGGTGG              |
| 71499                                                                                | 71518 | 70439 | 73075 | CDS product envelope glycoprotein H | 71499-71518 4:01:01  | CCTGGACTACCCTACCACC         |

|                                        |       |       |       |                                     |
|----------------------------------------|-------|-------|-------|-------------------------------------|
| 71556                                  | 71575 | 70439 | 73075 | CDS product envelope glycoprotein H |
| 71781                                  | 71815 | 70439 | 73075 | CDS product envelope glycoprotein H |
| CCTGGCCTTCGACCGCTCCGACGTCGCCGGTCGCC    |       |       |       |                                     |
| 71822                                  | 71836 | 70439 | 73075 | CDS product envelope glycoprotein H |
| 71847                                  | 71872 | 70439 | 73075 | CDS product envelope glycoprotein H |
| 71912                                  | 71928 | 70439 | 73075 | CDS product envelope glycoprotein H |
| 71934                                  | 71961 | 70439 | 73075 | CDS product envelope glycoprotein H |
| 72044                                  | 72063 | 70439 | 73075 | CDS product envelope glycoprotein H |
| 72083                                  | 72101 | 70439 | 73075 | CDS product envelope glycoprotein H |
| 72210                                  | 72227 | 70439 | 73075 | CDS product envelope glycoprotein H |
| 72218                                  | 72256 | 70439 | 73075 | CDS product envelope glycoprotein H |
| CCCTGGCCGGCCTGTCTGCCGGCGGCCCCAGTTTAGCC |       |       |       |                                     |
| 72378                                  | 72400 | 70439 | 73075 | CDS product envelope glycoprotein H |
| 72491                                  | 72517 | 70439 | 73075 | CDS product envelope glycoprotein H |
| 72675                                  | 72699 | 70439 | 73075 | CDS product envelope glycoprotein H |
| 72827                                  | 72849 | 70439 | 73075 | CDS product envelope glycoprotein H |
| 74561                                  | 74583 | 74386 | 75978 | CDS product tegument protein UL21   |
| 74595                                  | 74613 | 74386 | 75978 | CDS product tegument protein UL21   |
| 74656                                  | 74686 | 74386 | 75978 | CDS product tegument protein UL21   |
| GGAACTCTCGGCGCGCCGGCGAGGCTCACGG        |       |       |       |                                     |
| 74693                                  | 74709 | 74386 | 75978 | CDS product tegument protein UL21   |
| 74752                                  | 74769 | 74386 | 75978 | CDS product tegument protein UL21   |
| 74844                                  | 74859 | 74386 | 75978 | CDS product tegument protein UL21   |

|             |         |                              |
|-------------|---------|------------------------------|
| 71556-71575 | 5:02:01 | GGAGGCCGGCAGAAAGGGGG         |
| 71781-71815 | 6:03:01 |                              |
| 71822-71836 | 4:01:01 | GGCGCAGGGTGGCGG              |
| 71847-71872 | 6:03:01 | GGAGGCGGCCTCGCGGCGGCCCTGG    |
| 71912-71928 | 4:01:01 | CCGACCGGCGCCTGCCC            |
| 71934-71961 | 6:03:01 | GGTGCGGCTGGCCGGCGACCTGGCAAGG |
| 72044-72063 | 4:01:01 | CCGCCGGGCGCCAGTCGCCC         |
| 72083-72101 | 5:02:01 | CCGAGCCCACCGGCCCCC           |
| 72210-72227 | 4:01:01 | GGAAACGGCCCTGGCCGG           |
| 72218-72256 | 7:04:01 |                              |
| 72378-72400 | 5:02:01 | GGAGGCCAGCGGCGAGGCTTTGG      |
| 72491-72517 | 5:02:01 | CCTGCACCAAGCCGCTGCCCAAGCTCC  |
| 72675-72699 | 5:02:01 | CCGGGCGGCCACCCTGTTCACCCC     |
| 72827-72849 | 5:02:01 | CCACCATCCCAGCCTTTAACCCC      |
| 74561-74583 | 5:02:01 | CCGCTGCCGCCCAAATGCCCTCC      |
| 74595-74613 | 4:01:01 | CCGGCCGAGAACCTTGCCC          |
| 74656-74686 | 5:02:01 |                              |
| 74693-74709 | 4:01:01 | CCGCCAGCCACACTGCC            |
| 74752-74769 | 5:02:01 | GGCGGGGGTTCGAGGCGG           |
| 74844-74859 | 4:01:01 | GGCCTCGGGAAGGCGG             |

|       |       |       |       |                                   |
|-------|-------|-------|-------|-----------------------------------|
| 75092 | 75111 | 74386 | 75978 | CDS product tegument protein UL21 |
| 75402 | 75426 | 74386 | 75978 | CDS product tegument protein UL21 |
| 75678 | 75696 | 74386 | 75978 | CDS product tegument protein UL21 |
| 75791 | 75822 | 74386 | 75978 | CDS product tegument protein UL21 |

GGTCTCCAGGCGTTAGGCCGCGGACCGTCAGG

|       |       |       |       |                                   |
|-------|-------|-------|-------|-----------------------------------|
| 76562 | 76587 | 76498 | 77223 | CDS product envelope protein UL20 |
| 76661 | 76683 | 76498 | 77223 | CDS product envelope protein UL20 |
| 76697 | 76712 | 76498 | 77223 | CDS product envelope protein UL20 |
| 76817 | 76839 | 76498 | 77223 | CDS product envelope protein UL20 |
| 76938 | 76952 | 76498 | 77223 | CDS product envelope protein UL20 |
| 77066 | 77085 | 76498 | 77223 | CDS product envelope protein UL20 |
| 77128 | 77147 | 76498 | 77223 | CDS product envelope protein UL20 |
| 77477 | 77495 | 77440 | 81570 | CDS product major capsid protein  |
| 77757 | 77781 | 77440 | 81570 | CDS product major capsid protein  |
| 78236 | 78262 | 77440 | 81570 | CDS product major capsid protein  |
| 78395 | 78416 | 77440 | 81570 | CDS product major capsid protein  |
| 78590 | 78615 | 77440 | 81570 | CDS product major capsid protein  |
| 78706 | 78752 | 77440 | 81570 | CDS product major capsid protein  |

CCCCGAGTCCCGGCCAGCCGCGCACCTACCCCCCAAGACC

|       |       |       |       |                                  |
|-------|-------|-------|-------|----------------------------------|
| 78805 | 78830 | 77440 | 81570 | CDS product major capsid protein |
| 78918 | 78936 | 77440 | 81570 | CDS product major capsid protein |
| 79241 | 79286 | 77440 | 81570 | CDS product major capsid protein |

CCGGCACCGCCTGAGCCCCGCCACGGTGGCCGCGTCCGCGCCACC

|             |         |                           |
|-------------|---------|---------------------------|
| 75092-75111 | 4:01:01 | CCAGGCCGTCCCACGTTTCC      |
| 75402-75426 | 5:02:01 | CCCGTCCACCAGCGCCTCGAGCTCC |
| 75678-75696 | 4:01:01 | CCCCTGCGCCAAGACCTCC       |
| 75791-75822 | 5:02:01 |                           |

|             |         |                             |
|-------------|---------|-----------------------------|
| 76562-76587 | 6:03:01 | GGAGGCGCAGGCGGCGGACGACGGGG  |
| 76661-76683 | 4:01:01 | GGTGAGCTCGGCCGCGCGCGGG      |
| 76697-76712 | 4:01:01 | CCAGCCCGCCTTTTCC            |
| 76817-76839 | 5:02:01 | GGCAGGGGGTGCGGCAACGCTGG     |
| 76938-76952 | 4:01:01 | GGGCTGGCGGTGGGG             |
| 77066-77085 | 5:02:01 | CCACCGGCTCCTGCCGCTCC        |
| 77128-77147 | 4:01:01 | CCGTTTACGCCGCCGACGCC        |
| 77477-77495 | 5:02:01 | GGAGGTGGTCCGCGCGGG          |
| 77757-77781 | 5:02:01 | CCCCACCGGTCGACCAGCCCATCC    |
| 78236-78262 | 5:02:01 | GGACACCAAGGGCCGCGCGGTGGACGG |
| 78395-78416 | 4:01:01 | GGTTATGGGCAAGGCCGTCCGG      |
| 78590-78615 | 6:03:01 | CCAGGCCACCAACGTTCCCTACCCCC  |
| 78706-78752 | 9:06:02 |                             |

|             |          |                           |
|-------------|----------|---------------------------|
| 78805-78830 | 4:01:01  | CCGCGGGCACCTCTGCCACAGCTCC |
| 78918-78936 | 4:01:01  | GGCGGGGCGGCTGCTGG         |
| 79241-79286 | 10:07:02 |                           |

|                                                       |       |       |       |                                  |                                                   |
|-------------------------------------------------------|-------|-------|-------|----------------------------------|---------------------------------------------------|
| 79553                                                 | 79591 | 77440 | 81570 | CDS product major capsid protein | 79553-79591 8:05:02                               |
| GGACTACACGGTCCCGGGGAGGCTCTCGGCGGCCAGGG                |       |       |       |                                  |                                                   |
| 79613                                                 | 79641 | 77440 | 81570 | CDS product major capsid protein | 79613-79641 6:03:01                               |
| CCTGGTAGACCCCGCCTTCCTCCCGCCCC                         |       |       |       |                                  |                                                   |
| 79658                                                 | 79680 | 77440 | 81570 | CDS product major capsid protein | 79658-79680 5:02:01 CCCCTCATCTACCGGGCCGACC        |
| 79741                                                 | 79758 | 77440 | 81570 | CDS product major capsid protein | 79741-79758 4:01:01 GGGTGGAGATGGCCGAGG            |
| 79826                                                 | 79849 | 77440 | 81570 | CDS product major capsid protein | 79826-79849 4:01:01 CCCCGTCGTTCCCCACCACGACCC      |
| 79885                                                 | 79904 | 77440 | 81570 | CDS product major capsid protein | 79885-79904 4:01:01 CCGTGGTCCCGCCTTCTCC           |
| 80001                                                 | 80053 | 77440 | 81570 | CDS product major capsid protein | 80001-80053 8:05:02                               |
| CCCACGAGCCCGAGCGACCCGCGCCACCCGCTCAACCCGCGGCACCTCGTCCC |       |       |       |                                  |                                                   |
| 80157                                                 | 80208 | 77440 | 81570 | CDS product major capsid protein | 80157-80208 9:06:02                               |
| CCCATCCTGGCGGCCGTGGCCCCGACGCCGAACAGCCACGGCCGTGACCC    |       |       |       |                                  |                                                   |
| 80237                                                 | 80250 | 77440 | 81570 | CDS product major capsid protein | 80237-80250 4:01:01 CCACCACGGCCTCC                |
| 80437                                                 | 80460 | 77440 | 81570 | CDS product major capsid protein | 80437-80460 5:02:01 CCACCGTCCGACAGCCCGTGGTCC      |
| 80714                                                 | 80732 | 77440 | 81570 | CDS product major capsid protein | 80714-80732 4:01:01 CCTTACCCAGCCCCGCGCC           |
| 80810                                                 | 80829 | 77440 | 81570 | CDS product major capsid protein | 80810-80829 5:02:01 CCTCCCCAGAACCTGTACC           |
| 80898                                                 | 80925 | 77440 | 81570 | CDS product major capsid protein | 80898-80925 5:02:01 GGCAACCGGCTCGGGCCCCAGGGCCCCGG |
| 80949                                                 | 80963 | 77440 | 81570 | CDS product major capsid protein | 80949-80963 4:01:01 CCAGCCGCCCCGGCC               |
| 81137                                                 | 81153 | 77440 | 81570 | CDS product major capsid protein | 81137-81153 4:01:01 CCCAGCCTACCCAAGCC             |
| 81278                                                 | 81296 | 77440 | 81570 | CDS product major capsid protein | 81278-81296 4:01:01 GGAGGTGGAGCAAGGGG             |
| 81319                                                 | 81359 | 77440 | 81570 | CDS product major capsid protein | 81319-81359 7:04:01                               |
| CCGAGGCCGGCGCCTCCGTGGCGCCAGCACGGCCAACACC              |       |       |       |                                  |                                                   |
| 81384                                                 | 81405 | 77440 | 81570 | CDS product major capsid protein | 81384-81405 4:01:01 GGGTCCGCGACCTTGTGGAGG         |

|                                                 |       |       |       |                                               |                      |                        |
|-------------------------------------------------|-------|-------|-------|-----------------------------------------------|----------------------|------------------------|
| 81925                                           | 81943 | 81813 | 82763 | CDS product capsid triplex subunit 2          | 81925-81943 4:01:01  | CCGCCGGGCCATGCTAGCC    |
| 81980                                           | 82027 | 81813 | 82763 | CDS product capsid triplex subunit 2          | 81980-82027 10:07:02 |                        |
| CCTCCGGACACCCTCTCCCTCATGGCCGCCTACCGCCGCCGTTTCCC |       |       |       |                                               |                      |                        |
| 82108                                           | 82130 | 81813 | 82763 | CDS product capsid triplex subunit 2          | 82108-82130 4:01:01  | CCAAAACACCGGCCCTTTGACC |
| 82160                                           | 82193 | 81813 | 82763 | CDS product capsid triplex subunit 2          | 82160-82193 6:03:01  |                        |
| CCGCCGCTCCTGGACCTGGAAGACCGGCTGCGCC              |       |       |       |                                               |                      |                        |
| 82370                                           | 82385 | 81813 | 82763 | CDS product capsid triplex subunit 2          | 82370-82385 4:01:01  | CCGGACCTCCAGCACC       |
| 82567                                           | 82589 | 81813 | 82763 | CDS product capsid triplex subunit 2          | 82567-82589 5:02:01  | CCAACAGCCGCCCGCGGCCCC  |
| 82621                                           | 82646 | 81813 | 82763 | CDS product capsid triplex subunit 2          | 82621-82646 5:02:01  |                        |
| GGCGCTGATGGCGTGGATTGGAACGG                      |       |       |       |                                               |                      |                        |
| 82706                                           | 82736 | 81813 | 82763 | CDS product capsid triplex subunit 2          | 82706-82736 6:03:01  |                        |
| GGCCCATCGGTGGTGGCCGAGGTGAGAAGG                  |       |       |       |                                               |                      |                        |
| 82909                                           | 82930 | 82877 | 88735 | CDS product DNA packaging terminase subunit 1 | 82909-82930 5:02:01  |                        |
| GGACGGGGGAGGCTGCTCAGG                           |       |       |       |                                               |                      |                        |
| 82938                                           | 82954 | 82877 | 88735 | CDS product DNA packaging terminase subunit 1 | 82938-82954 4:01:01  |                        |
| CCATCACCAGGGCCACC                               |       |       |       |                                               |                      |                        |
| 82965                                           | 82986 | 82877 | 88735 | CDS product DNA packaging terminase subunit 1 | 82965-82986 4:01:01  |                        |
| CCGACGCGCCGCTCGCTTCCC                           |       |       |       |                                               |                      |                        |
| 83330                                           | 83350 | 82877 | 88735 | CDS product DNA packaging terminase subunit 1 | 83330-83350 4:01:01  |                        |
| CCCTCGACGGCCACCCGACCC                           |       |       |       |                                               |                      |                        |
| 83359                                           | 83375 | 82877 | 88735 | CDS product DNA packaging terminase subunit 1 | 83359-83375 4:01:01  |                        |
| GGGTCGCGGGTGGATGG                               |       |       |       |                                               |                      |                        |
| 83495                                           | 83524 | 82877 | 88735 | CDS product DNA packaging terminase subunit 1 | 83495-83524 6:03:01  |                        |

|                                                        |       |       |       |                                                 |                                     |
|--------------------------------------------------------|-------|-------|-------|-------------------------------------------------|-------------------------------------|
| CCCACGACCGCCACGCCGTCCTCCGGACGCC                        |       |       |       |                                                 |                                     |
| 83518                                                  | 83548 | 82877 | 88735 | CDS product DNA packaging terminase subunit 1   | 83518-83548 6:03:01                 |
| GGACGCCAGGGAGTTGGTGGTAAAGGCCGGG                        |       |       |       |                                                 |                                     |
| 83580                                                  | 83596 | 82877 | 88735 | CDS product DNA packaging terminase subunit 1   | 83580-83596 4:01:01                 |
| CCGCCTGGTTCGCCACC                                      |       |       |       |                                                 |                                     |
| 83664                                                  | 83685 | 82877 | 88735 | CDS product DNA packaging terminase subunit 1   | 83664-83685 6:03:01                 |
| CCCCACTACGCCCCACCGCC                                   |       |       |       |                                                 |                                     |
| 83868                                                  | 83878 | 82877 | 88735 | CDS product DNA packaging terminase subunit 1   | 83868-83878 4:01:01 CCGCCGCCCCC     |
| 84125                                                  | 84144 | 82877 | 88735 | CDS product DNA packaging terminase subunit 1   | 84125-84144 5:02:01                 |
| CCCCCGCGCGCCCCACCACC                                   |       |       |       |                                                 |                                     |
| 84158                                                  | 84215 | 82877 | 88735 | CDS product DNA packaging terminase subunit 1   | 84158-84215 11:08:02                |
| CCGCCTTTTCGCTCTTGCCGCCGTCGCGCCGACGCCGCCCCCGCCATGAACGCC |       |       |       |                                                 |                                     |
| 84252                                                  | 84278 | 84207 | 86327 | CDS product DNA packaging tegument protein UL17 | 84252-84278 5:02:01                 |
| CCCGTCGCCGAGACCGGGGCCTGGTCC                            |       |       |       |                                                 |                                     |
| 84290                                                  | 84313 | 84207 | 86327 | CDS product DNA packaging tegument protein UL17 | 84290-84313 5:02:01                 |
| CCCGACGCCTGCCTCGCCAAGGCC                               |       |       |       |                                                 |                                     |
| 84745                                                  | 84759 | 84207 | 86327 | CDS product DNA packaging tegument protein UL17 | 84745-84759 4:01:01 CCGCCCTGACCTGCC |
| 84793                                                  | 84821 | 84207 | 86327 | CDS product DNA packaging tegument protein UL17 | 84793-84821 5:02:01                 |
| GGCCGGCCTCCGGGACGCGGCCGCTTCGG                          |       |       |       |                                                 |                                     |
| 84835                                                  | 84851 | 84207 | 86327 | CDS product DNA packaging tegument protein UL17 | 84835-84851 4:01:01                 |
| GGAGGTGGTCGACGGGG                                      |       |       |       |                                                 |                                     |
| 84948                                                  | 84964 | 84207 | 86327 | CDS product DNA packaging tegument protein UL17 | 84948-84964 4:01:01                 |
| CCCTTATCCGCGCGCC                                       |       |       |       |                                                 |                                     |



|                                           |       |       |       |                                                 |             |         |
|-------------------------------------------|-------|-------|-------|-------------------------------------------------|-------------|---------|
| 85018                                     | 85039 | 84207 | 86327 | CDS product DNA packaging tegument protein UL17 | 85018-85039 | 5:02:01 |
| GGGCGGCGGGCCGGTTCGAAGG                    |       |       |       |                                                 |             |         |
| 85048                                     | 85077 | 84207 | 86327 | CDS product DNA packaging tegument protein UL17 | 85048-85077 | 6:03:01 |
| GGCCTCGGGGCTGCGGCAGGGGCGCGTGG             |       |       |       |                                                 |             |         |
| 85080                                     | 85107 | 84207 | 86327 | CDS product DNA packaging tegument protein UL17 | 85080-85107 | 5:02:01 |
| CCCGCCCGCCGGACGCCCGGCTGCCCC               |       |       |       |                                                 |             |         |
| 85090                                     | 85123 | 84207 | 86327 | CDS product DNA packaging tegument protein UL17 | 85090-85123 | 6:03:01 |
| GGACGCCCCGGCTGCCCCGGGCGGGGGGCGGG          |       |       |       |                                                 |             |         |
| 85186                                     | 85198 | 84207 | 86327 | CDS product DNA packaging tegument protein UL17 | 85186-85198 | 4:01:01 |
| 85195                                     | 85214 | 84207 | 86327 | CDS product DNA packaging tegument protein UL17 | 85195-85214 | 5:02:01 |
| CCGCGCCACCTGCCCCGCC                       |       |       |       |                                                 |             |         |
| 85229                                     | 85259 | 84207 | 86327 | CDS product DNA packaging tegument protein UL17 | 85229-85259 | 5:02:01 |
| CCCGCGGACCGCAAAGCCCCCGCGCGCCC             |       |       |       |                                                 |             |         |
| 85283                                     | 85306 | 84207 | 86327 | CDS product DNA packaging tegument protein UL17 | 85283-85306 | 5:02:01 |
| CCCGAGAACGCCAACCCCTCACC                   |       |       |       |                                                 |             |         |
| 85471                                     | 85513 | 84207 | 86327 | CDS product DNA packaging tegument protein UL17 | 85471-85513 | 8:05:02 |
| CCGCGCGCCACGGGCCACCTCGCCGGCTCGGCCACCCGGCC |       |       |       |                                                 |             |         |
| 85521                                     | 85544 | 84207 | 86327 | CDS product DNA packaging tegument protein UL17 | 85521-85544 | 4:01:01 |
| GGGCGTGCCTGGTCGCCGGCGTGG                  |       |       |       |                                                 |             |         |
| 85546                                     | 85574 | 84207 | 86327 | CDS product DNA packaging tegument protein UL17 | 85546-85574 | 6:03:01 |
| CCACCCGCGCAACCTGCCTCCCGAGGCC              |       |       |       |                                                 |             |         |
| 85613                                     | 85635 | 84207 | 86327 | CDS product DNA packaging tegument protein UL17 | 85613-85635 | 5:02:01 |
| CCGCTCGCCAACACGCCCGGCC                    |       |       |       |                                                 |             |         |

|                                           |       |       |       |                                                 |                                                  |
|-------------------------------------------|-------|-------|-------|-------------------------------------------------|--------------------------------------------------|
| 85722                                     | 85743 | 84207 | 86327 | CDS product DNA packaging tegument protein UL17 | 85722-85743 4:01:01                              |
| CCGAAAGCCTGCGGCCAGCCC                     |       |       |       |                                                 |                                                  |
| 85774                                     | 85787 | 84207 | 86327 | CDS product DNA packaging tegument protein UL17 | 85774-85787 4:01:01 CCACGACCGCCACC               |
| 85831                                     | 85847 | 84207 | 86327 | CDS product DNA packaging tegument protein UL17 | 85831-85847 4:01:01                              |
| GGAGGCCGTGGCCTTGG                         |       |       |       |                                                 |                                                  |
| 85836                                     | 85870 | 84207 | 86327 | CDS product DNA packaging tegument protein UL17 | 85836-85870 8:05:02                              |
| CCGTGGCCTTGGCCGTCCGCCACGCCTCCGTCGCC       |       |       |       |                                                 |                                                  |
| 85912                                     | 85936 | 84207 | 86327 | CDS product DNA packaging tegument protein UL17 | 85912-85936 4:01:01                              |
| CCTCAGCTCCCGGGCCGGGCTCCC                  |       |       |       |                                                 |                                                  |
| 86020                                     | 86033 | 84207 | 86327 | CDS product DNA packaging tegument protein UL17 | 86020-86033 4:01:01 GGGCGGCGAGGTGG               |
| 86417                                     | 86439 | 86344 | 87510 | CDS product tegument protein UL16               | 86417-86439 5:02:01 GCGGCGCGGCGCCTGGCCGAGG       |
| 86429                                     | 86447 | 86344 | 87510 | CDS product tegument protein UL16               | 86429-86447 4:01:01 CCTGGCCGAGGCCCTCACC          |
| 86458                                     | 86485 | 86344 | 87510 | CDS product tegument protein UL16               | 86458-86485 5:02:01 CCGCCCTGCGCCTCGTCCGCGGGGACCC |
| 86516                                     | 86557 | 86344 | 87510 | CDS product tegument protein UL16               | 86516-86557 10:07:02                             |
| CCTCAGCCCCCGCCTGGCGCCGTTCGTACCGCCCCGCCCCC |       |       |       |                                                 |                                                  |
| 86567                                     | 86585 | 86344 | 87510 | CDS product tegument protein UL16               | 86567-86585 4:01:01 CCACGCCTCCAAGTGTGCC          |
| 86781                                     | 86810 | 86344 | 87510 | CDS product tegument protein UL16               | 86781-86810 6:03:01                              |
| CCCGACCCGGCAGCCGAGACCGTCCCCGCC            |       |       |       |                                                 |                                                  |
| 86891                                     | 86909 | 86344 | 87510 | CDS product tegument protein UL16               | 86891-86909 4:01:01 GCGCGCGGGCGTTTGGTGG          |
| 86976                                     | 86998 | 86344 | 87510 | CDS product tegument protein UL16               | 86976-86998 5:02:01 GGGTGGCGGGCGCGGCCCTTGG       |
| 87239                                     | 87264 | 86344 | 87510 | CDS product tegument protein UL16               | 87239-87264 5:02:01 CCGCAGCCCCAAGATCACCCCCGACC   |
| 87266                                     | 87298 | 86344 | 87510 | CDS product tegument protein UL16               | 87266-87298 6:03:01                              |
| GGCGGACGTGCTGGTGGCCTGGGCCCCACGG           |       |       |       |                                                 |                                                  |

|                                               |       |       |       |                                               |                                                  |
|-----------------------------------------------|-------|-------|-------|-----------------------------------------------|--------------------------------------------------|
| 87284                                         | 87300 | 86344 | 87510 | CDS product tegument protein UL16             | 87284-87300 4:01:01 CCTGGGCCCCACGGCC             |
| 87324                                         | 87351 | 86344 | 87510 | CDS product tegument protein UL16             | 87324-87351 6:03:01 GGCTGGAAGCTGGCGGTGCTGGACCCGG |
| 87408                                         | 87431 | 86344 | 87510 | CDS product tegument protein UL16             | 87408-87431 4:01:01 GGCCCTCGCGGCGAGGAACACCGG     |
| 87442                                         | 87458 | 86344 | 87510 | CDS product tegument protein UL16             | 87442-87458 4:01:01 GGCGGGCCTCGGGCAGG            |
| 87461                                         | 87483 | 86344 | 87510 | CDS product tegument protein UL16             | 87461-87483 4:01:01 CCCGTCCGGGTCCGGACGGTCCC      |
| 87468                                         | 87498 | 86344 | 87510 | CDS product tegument protein UL16             | 87468-87498 7:04:01                              |
| GGGTCCGGACGGTCCCGGTGCGGCGAGGCGG               |       |       |       |                                               |                                                  |
| 87593                                         | 87638 | 82877 | 88735 | CDS product DNA packaging terminase subunit 1 | 87593-87638 9:06:02                              |
| GGCGCGGTGTGGTCTTTGGGACTGGGCAGGTTGGCGAGCGGCTGG |       |       |       |                                               |                                                  |
| 87647                                         | 87670 | 82877 | 88735 | CDS product DNA packaging terminase subunit 1 | 87647-87670 6:03:01                              |
| GGTGAAGGGGGCGGCGAGGGAGG                       |       |       |       |                                               |                                                  |
| 87942                                         | 87965 | 82877 | 88735 | CDS product DNA packaging terminase subunit 1 | 87942-87965 4:01:01                              |
| GGCGACGCGGAACCAGGAAAACGG                      |       |       |       |                                               |                                                  |
| 88051                                         | 88073 | 82877 | 88735 | CDS product DNA packaging terminase subunit 1 | 88051-88073 4:01:01                              |
| GGCGTGGTCGCCTAGGATGACGG                       |       |       |       |                                               |                                                  |
| 88175                                         | 88194 | 82877 | 88735 | CDS product DNA packaging terminase subunit 1 | 88175-88194 4:01:01                              |
| CCCGCGCGCCGGCCGTCCCC                          |       |       |       |                                               |                                                  |
| 88370                                         | 88393 | 82877 | 88735 | CDS product DNA packaging terminase subunit 1 | 88370-88393 4:01:01                              |
| CCCCTCAGAGCCTGGGTCACCTCC                      |       |       |       |                                               |                                                  |
| 88428                                         | 88468 | 82877 | 88735 | CDS product DNA packaging terminase subunit 1 | 88428-88468 8:05:02                              |
| CCC GCCCTCGCGCCTCGCCGACCGGCCTGCTTCCGGGCC      |       |       |       |                                               |                                                  |
| 88486                                         | 88501 | 82877 | 88735 | CDS product DNA packaging terminase subunit 1 | 88486-88501 5:02:01 CCGCCTCGCCACCGCC             |
| 88541                                         | 88558 | 82877 | 88735 | CDS product DNA packaging terminase subunit 1 | 88541-88558 5:02:01                              |

|                                           |       |       |       |                                                      |                                               |
|-------------------------------------------|-------|-------|-------|------------------------------------------------------|-----------------------------------------------|
| CCAACCCCGGCACCACC                         |       |       |       |                                                      |                                               |
| 88674                                     | 88690 | 82877 | 88735 | CDS product DNA packaging terminase subunit 1        | 88674-88690 4:01:01                           |
| CCTCCCGCCGAGGTCC                          |       |       |       |                                                      |                                               |
| 88772                                     | 88800 | 88766 | 89689 | CDS product tegument protein UL14                    | 88772-88800 5:02:01                           |
| GGGGTCCAGGTCAGCGCGGCCAGCGG                |       |       |       |                                                      |                                               |
| 89049                                     | 89066 | 88766 | 89689 | CDS product tegument protein UL14                    | 89049-89066 4:01:01 CCGCCGCTTCCTGCATCC        |
| 89115                                     | 89131 | 88766 | 89689 | CDS product tegument protein UL14                    | 89115-89131 4:01:01 GGAGGACCGGCTAACGG         |
| 89228                                     | 89242 | 88766 | 89689 | CDS product tegument protein UL14                    | 89228-89242 4:01:01 GGATGTTGGGGGAGG           |
| 89301                                     | 89320 | 88766 | 89689 | CDS product tegument protein UL14                    | 89301-89320 4:01:01 GGGCGGACCGCGAGCTGG        |
| 89330                                     | 89354 | 88766 | 89689 | CDS product tegument protein UL14                    | 89330-89354 4:01:01 CCGCTGGGGCCAGGAGCCCGGACCC |
| 89411                                     | 89452 | 88766 | 89689 | CDS product tegument protein UL14                    | 89411-89452 7:04:01                           |
| GGCCCGACGGCGGCTCGGGTCAGAGGCCCGCCCGCCTCGGG |       |       |       |                                                      |                                               |
| 89458                                     | 89499 | 88766 | 89689 | CDS product tegument protein UL14                    | 89458-89499 7:04:01                           |
| CCTCCTCAGGGCCCATCGGATCCAGACAGTCCATGGCCGCC |       |       |       |                                                      |                                               |
| 89492                                     | 89511 | 88766 | 89689 | CDS product tegument protein UL14                    | 89492-89511 4:01:01 GGCCGCCCGGTGTCGGGCGG      |
| 89521                                     | 89541 | 88766 | 89689 | CDS product tegument protein UL14                    | 89521-89541 4:01:01 GGCTCGTCGGACGACCCGGG      |
| 89549                                     | 89579 | 88766 | 89689 | CDS product tegument protein UL14                    | 89549-89579 6:03:01                           |
| CCCCGAGTCCGCCCACAGTCCGGGGAGCCC            |       |       |       |                                                      |                                               |
| 89841                                     | 89865 | 89191 | 90939 | CDS product tegument serine/threonine protein kinase | 89841-89865 5:02:01                           |
| GGCGGCGGGGAGCTACGGCGAGG                   |       |       |       |                                                      |                                               |
| 90395                                     | 90410 | 89191 | 90939 | CDS product tegument serine/threonine protein kinase | 90395-90410 4:01:01                           |
| GGTGGTTGCCACGGG                           |       |       |       |                                                      |                                               |
| 90476                                     | 90492 | 89191 | 90939 | CDS product tegument serine/threonine protein kinase | 90476-90492 4:01:01                           |

|                                             |       |       |       |                                                      |             |                                          |
|---------------------------------------------|-------|-------|-------|------------------------------------------------------|-------------|------------------------------------------|
| CCCCCTCCGGCACGACC                           |       |       |       |                                                      |             |                                          |
| 90495                                       | 90507 | 89191 | 90939 | CDS product tegument serine/threonine protein kinase | 90495-90507 | 4:01:01                                  |
| GGGCTGGCGGTGG                               |       |       |       |                                                      |             |                                          |
| 90557                                       | 90580 | 89191 | 90939 | CDS product tegument serine/threonine protein kinase | 90557-90580 | 4:01:01                                  |
| CCTGTCGCCGTGCTTGCCGGTTCC                    |       |       |       |                                                      |             |                                          |
| 90683                                       | 90701 | 89191 | 90939 | CDS product tegument serine/threonine protein kinase | 90683-90701 | 4:01:01                                  |
| CCCATCCACGCCGCTCACC                         |       |       |       |                                                      |             |                                          |
| 90800                                       | 90819 | 89191 | 90939 | CDS product tegument serine/threonine protein kinase | 90800-90819 | 4:01:01                                  |
| CCGCCTGACGCACCGGCGCC                        |       |       |       |                                                      |             |                                          |
| 90840                                       | 90856 | 89191 | 90939 | CDS product tegument serine/threonine protein kinase | 90840-90856 | 4:01:01                                  |
| CCCACCACCCTCTCTCC                           |       |       |       |                                                      |             |                                          |
| 90978                                       | 90994 | 90924 | 92609 | CDS product deoxyribonuclease                        | 90978-90994 | 4:01:01 CCTCCTACCCCTACGCC                |
| 91010                                       | 91043 | 90924 | 92609 | CDS product deoxyribonuclease                        | 91010-91043 | 7:04:01                                  |
| CCCGCCTCCCTCGAGGACCCCCCGCGTTCCCCC           |       |       |       |                                                      |             |                                          |
| 91103                                       | 91123 | 90924 | 92609 | CDS product deoxyribonuclease                        | 91103-91123 | 4:01:01 CCCGCGCGCCTGTACCTGCCC            |
| 91174                                       | 91191 | 90924 | 92609 | CDS product deoxyribonuclease                        | 91174-91191 | 4:01:01 CCGGAGCAGCCCCCTGCC               |
| 91225                                       | 91256 | 90924 | 92609 | CDS product deoxyribonuclease                        | 91225-91256 | 6:03:01 CCGCCTGGCCTACATCCACGACCTGGTGGGCC |
| 91249                                       | 91292 | 90924 | 92609 | CDS product deoxyribonuclease                        | 91249-91292 | 9:06:02                                  |
| GGTGGGCCGATGGAGCTGGAGGGGCTAGTGGGCCGTGGAACGG |       |       |       |                                                      |             |                                          |
| 91296                                       | 91319 | 90924 | 92609 | CDS product deoxyribonuclease                        | 91296-91319 | 5:02:01 CCGCCCTGGTGGGCCTCTCCGGCC         |
| 91303                                       | 91324 | 90924 | 92609 | CDS product deoxyribonuclease                        | 91303-91324 | 4:01:01 GGTGGGCCTCTCCGGCCGCGGG           |
| 91461                                       | 91478 | 90924 | 92609 | CDS product deoxyribonuclease                        | 91461-91478 | 4:01:01 GGCGCGGGCTGGCTACGG               |
| 91491                                       | 91507 | 90924 | 92609 | CDS product deoxyribonuclease                        | 91491-91507 | 4:01:01 GGTGGGGGCTTGCGGG                 |

|                                   |       |       |       |                                           |                     |                                  |
|-----------------------------------|-------|-------|-------|-------------------------------------------|---------------------|----------------------------------|
| 91603                             | 91622 | 90924 | 92609 | CDS product deoxyribonuclease             | 91603-91622 4:01:01 | GGCCAGGTCGCTGGTGTCCG             |
| 91669                             | 91687 | 90924 | 92609 | CDS product deoxyribonuclease             | 91669-91687 4:01:01 | GGACCCGCGGGGTGGCCG               |
| 91870                             | 91893 | 90924 | 92609 | CDS product deoxyribonuclease             | 91870-91893 4:01:01 | CCGGGCAAGTACCTCTTCGACCC          |
| 91926                             | 91958 | 90924 | 92609 | CDS product deoxyribonuclease             | 91926-91958 6:03:01 |                                  |
| CCAACCTCCAAAAGCACCGCAGCGCCGCGTGCC |       |       |       |                                           |                     |                                  |
| 92009                             | 92029 | 90924 | 92609 | CDS product deoxyribonuclease             | 92009-92029 4:01:01 | CCAGGCCGCGTCCCCGGCGCC            |
| 92024                             | 92042 | 90924 | 92609 | CDS product deoxyribonuclease             | 92024-92042 4:01:01 | GGCGCCGCGGAGGCGCTGG              |
| 92205                             | 92237 | 90924 | 92609 | CDS product deoxyribonuclease             | 92205-92237 5:02:01 |                                  |
| GGGACACTGGCGAGTTGGCGCTGTCGGTCCCCG |       |       |       |                                           |                     |                                  |
| 92361                             | 92377 | 90924 | 92609 | CDS product deoxyribonuclease             | 92361-92377 4:01:01 | GGCGGTGCGAGGAGGGG                |
| 92437                             | 92457 | 90924 | 92609 | CDS product deoxyribonuclease             | 92437-92457 4:01:01 | CCACCCAGCTGCGCCGTTC              |
| 92479                             | 92510 | 90924 | 92609 | CDS product deoxyribonuclease             | 92479-92510 5:02:01 | GGTTATTGTGGACCGCGAGGGTTGCTGGGAGG |
| 92676                             | 92696 | 92561 | 92785 | CDS product myristylated tegument protein | 92676-92696 5:02:01 |                                  |
| CCTTCCGGCAGACCCCGGCC              |       |       |       |                                           |                     |                                  |
| 92754                             | 92777 | 92561 | 92785 | CDS product myristylated tegument protein | 92754-92777 5:02:01 |                                  |
| CCCCGACCCAAGCGCCGCGACCC           |       |       |       |                                           |                     |                                  |
| 93062                             | 93088 | 92993 | 94357 | CDS product envelope glycoprotein M       | 93062-93088 5:02:01 | CCCCTGACCGGGTACCGGTCTTCCGCC      |
| 93115                             | 93136 | 92993 | 94357 | CDS product envelope glycoprotein M       | 93115-93136 4:01:01 | GGTCTCGTAGGCGTCGGAGAGG           |
| 93324                             | 93344 | 92993 | 94357 | CDS product envelope glycoprotein M       | 93324-93344 4:01:01 | CCACGGCCCCCATGACGGCCC            |
| 93651                             | 93675 | 92993 | 94357 | CDS product envelope glycoprotein M       | 93651-93675 4:01:01 | GGTTGGCGACAACGGCGGCCAGGG         |
| 93687                             | 93707 | 92993 | 94357 | CDS product envelope glycoprotein M       | 93687-93707 4:01:01 | GGTGCATGGCGCTGCTGGTGG            |
| 93781                             | 93812 | 92993 | 94357 | CDS product envelope glycoprotein M       | 93781-93812 6:03:01 |                                  |
| GGCAAGGGCGAGGAAGTGGGCGATGTAGGCGG  |       |       |       |                                           |                     |                                  |

|                                        |       |       |       |                                                     |                     |                            |
|----------------------------------------|-------|-------|-------|-----------------------------------------------------|---------------------|----------------------------|
| 93871                                  | 93896 | 92993 | 94357 | CDS product envelope glycoprotein M                 | 93871-93896 5:02:01 | GGCGGACAGGGTGCCCAGGGTGATGG |
| 93949                                  | 93967 | 92993 | 94357 | CDS product envelope glycoprotein M                 | 93949-93967 4:01:01 | GGAGGAGCCGCCGTTTGG         |
| 94044                                  | 94064 | 92993 | 94357 | CDS product envelope glycoprotein M                 | 94044-94064 5:02:01 | GGAAGGCTGCCGTGGTGGCGG      |
| 94086                                  | 94123 | 92993 | 94357 | CDS product envelope glycoprotein M                 | 94086-94123 7:04:01 |                            |
| CCACTCCGCCAGTTATCCGATGCATCCACACCCCGTCC |       |       |       |                                                     |                     |                            |
| 94292                                  | 94315 | 92993 | 94357 | CDS product envelope glycoprotein M                 | 94292-94315 5:02:01 | CCCTCTCCAGCCGCGCCCGGCACC   |
| 94547                                  | 94567 | 94278 | 96938 | CDS product DNA replication origin-binding helicase | 94547-94567 4:01:01 |                            |
| CCTCGGCCTCGGGATCCCACC                  |       |       |       |                                                     |                     |                            |
| 94980                                  | 95003 | 94278 | 96938 | CDS product DNA replication origin-binding helicase | 94980-95003 4:01:01 |                            |
| CCATGGACGCCACGGCCAACGCCC               |       |       |       |                                                     |                     |                            |
| 95507                                  | 95525 | 94278 | 96938 | CDS product DNA replication origin-binding helicase | 95507-95525 4:01:01 |                            |
| GGCCCGGACATGGTGTCGG                    |       |       |       |                                                     |                     |                            |
| 95592                                  | 95610 | 94278 | 96938 | CDS product DNA replication origin-binding helicase | 95592-95610 4:01:01 |                            |
| CCGGGGCCAGGCCCGAGCC                    |       |       |       |                                                     |                     |                            |
| 95830                                  | 95861 | 94278 | 96938 | CDS product DNA replication origin-binding helicase | 95830-95861 6:03:01 |                            |
| CCTGCACACCCTCCTCGAGTCCAACCGGTCC        |       |       |       |                                                     |                     |                            |
| 95965                                  | 96004 | 94278 | 96938 | CDS product DNA replication origin-binding helicase | 95965-96004 8:05:02 |                            |
| CCAGCTCCGGGAGCCCGGCCCGCCGCGCCACCACTACC |       |       |       |                                                     |                     |                            |
| 96055                                  | 96092 | 94278 | 96938 | CDS product DNA replication origin-binding helicase | 96055-96092 6:03:01 |                            |
| GGCCGACGTGGCCTGCGAGGACATCAGGGGGCTCTTG  |       |       |       |                                                     |                     |                            |
| 96093                                  | 96116 | 94278 | 96938 | CDS product DNA replication origin-binding helicase | 96093-96116 4:01:01 |                            |
| CCGAGCTCCACAGCCCCGTCGTCC               |       |       |       |                                                     |                     |                            |
| 96359                                  | 96374 | 94278 | 96938 | CDS product DNA replication origin-binding helicase | 96359-96374 4:01:01 |                            |

|                                                   |       |       |       |                                                     |                                              |
|---------------------------------------------------|-------|-------|-------|-----------------------------------------------------|----------------------------------------------|
| GGGGGATCGGCCTCGG                                  |       |       |       |                                                     |                                              |
| 96667                                             | 96701 | 94278 | 96938 | CDS product DNA replication origin-binding helicase | 96667-96701 7:04:01                          |
| GGAGGAGATAGTGGGGCTTTTGGAGGCGGCAGGGG               |       |       |       |                                                     |                                              |
| 96892                                             | 96914 | 94278 | 96938 | CDS product DNA replication origin-binding helicase | 96892-96914 5:02:01                          |
| GGCGTGGCCACAGGCCAGGGG                             |       |       |       |                                                     |                                              |
| 97046                                             | 97067 | 96983 | 99238 | CDS product helicase-primase subunit                | 97046-97067 4:01:01 GGACGGACCCGGCCGAGCCGGG   |
| 97053                                             | 97102 | 96983 | 99238 | CDS product helicase-primase subunit                | 97053-97102 10:07:02                         |
| CCCGGCCGAGCCGGCGCCCTCCAGGCCCTGGTCCACCTGCTCTGCCGCC |       |       |       |                                                     |                                              |
| 97195                                             | 97215 | 96983 | 99238 | CDS product helicase-primase subunit                | 97195-97215 4:01:01 CCCGCCGCGCGGCCGCGGCC     |
| 97206                                             | 97225 | 96983 | 99238 | CDS product helicase-primase subunit                | 97206-97225 4:01:01 GGCCGCGCCGGGCACAGGG      |
| 97246                                             | 97269 | 96983 | 99238 | CDS product helicase-primase subunit                | 97246-97269 5:02:01 CCGCTCGCCGCCCTGGGCCAGGCC |
| 97313                                             | 97328 | 96983 | 99238 | CDS product helicase-primase subunit                | 97313-97328 4:01:01 GGCGGACCCTGGGCGG         |
| 97350                                             | 97399 | 96983 | 99238 | CDS product helicase-primase subunit                | 97350-97399 8:05:02                          |
| GGCGCTTGGGGTAGACCCGGCCACCGGGCTTTGGTGGCGGCCGCGCCG  |       |       |       |                                                     |                                              |
| 97391                                             | 97413 | 96983 | 99238 | CDS product helicase-primase subunit                | 97391-97413 4:01:01 CCGCGCCGGCGCCCGCGCGGGCC  |
| 97409                                             | 97440 | 96983 | 99238 | CDS product helicase-primase subunit                | 97409-97440 6:03:01                          |
| GGGCCGGCGCGGCAGAGGAGCCGGGCCCGCGG                  |       |       |       |                                                     |                                              |
| 97429                                             | 97446 | 96983 | 99238 | CDS product helicase-primase subunit                | 97429-97446 4:01:01 CCGGGCCCGCGCCCGCC        |
| 97460                                             | 97481 | 96983 | 99238 | CDS product helicase-primase subunit                | 97460-97481 4:01:01 CCGCCGAGGTGCCCTGGACCC    |
| 97467                                             | 97504 | 96983 | 99238 | CDS product helicase-primase subunit                | 97467-97504 7:04:01                          |
| GGTGCCCTTGACCCGGCGCGGTTAGGGCCACGCGG               |       |       |       |                                                     |                                              |
| 97778                                             | 97806 | 96983 | 99238 | CDS product helicase-primase subunit                | 97778-97806 6:03:01                          |
| CCAGCTCCCAGGCCGCTCCGGCCTGGCC                      |       |       |       |                                                     |                                              |



|                                                |       |       |       |                                      |                                             |
|------------------------------------------------|-------|-------|-------|--------------------------------------|---------------------------------------------|
| 97868                                          | 97896 | 96983 | 99238 | CDS product helicase-primase subunit | 97868-97896 5:02:01                         |
| CCGTGCCCCGTCTTCGCCTACCTCGGCCCC                 |       |       |       |                                      |                                             |
| 97970                                          | 97992 | 96983 | 99238 | CDS product helicase-primase subunit | 97970-97992 5:02:01 CCGCCTCGACCACTCCCAGAGCC |
| 98018                                          | 98037 | 96983 | 99238 | CDS product helicase-primase subunit | 98018-98037 4:01:01 GGTTTGC GGACGGCCTCTGG   |
| 98072                                          | 98099 | 96983 | 99238 | CDS product helicase-primase subunit | 98072-98099 4:01:01                         |
| CCCCGTGGGGGCCGGGGGACCGCTGGCC                   |       |       |       |                                      |                                             |
| 98078                                          | 98108 | 96983 | 99238 | CDS product helicase-primase subunit | 98078-98108 7:04:01                         |
| GGGGGCCGGGGGACCGCTGGCCTGGCGAGGG                |       |       |       |                                      |                                             |
| 98117                                          | 98142 | 96983 | 99238 | CDS product helicase-primase subunit | 98117-98142 5:02:01                         |
| GGCGGCTGGCTGCGACGGCGTCCCGG                     |       |       |       |                                      |                                             |
| 98160                                          | 98178 | 96983 | 99238 | CDS product helicase-primase subunit | 98160-98178 4:01:01 GGACGCGTGCCGGCAGGG      |
| 98196                                          | 98226 | 96983 | 99238 | CDS product helicase-primase subunit | 98196-98226 5:02:01                         |
| GGAGTCGCCGGCGGCGCTGCAGGGGCCCTGG                |       |       |       |                                      |                                             |
| 98268                                          | 98301 | 96983 | 99238 | CDS product helicase-primase subunit | 98268-98301 6:03:01                         |
| CCTGGCCCTGTTTCCGAACCACGCGGCCTGGCC              |       |       |       |                                      |                                             |
| 98336                                          | 98353 | 96983 | 99238 | CDS product helicase-primase subunit | 98336-98353 4:01:01 CCGCCCTGAAGCCTGCCC      |
| 98382                                          | 98406 | 96983 | 99238 | CDS product helicase-primase subunit | 98382-98406 5:02:01                         |
| CCTGGACCCCGCGGCCTACCGGGCC                      |       |       |       |                                      |                                             |
| 98413                                          | 98459 | 96983 | 99238 | CDS product helicase-primase subunit | 98413-98459 7:04:01                         |
| GGCCTGGCCAACGGGATAAGCCGGCGCCTGGAGCGGAGGCAAACGG |       |       |       |                                      |                                             |
| 98643                                          | 98665 | 96983 | 99238 | CDS product helicase-primase subunit | 98643-98665 4:01:01 CCTGCGCCTGCGCCTCGAGGGCC |
| 98678                                          | 98695 | 96983 | 99238 | CDS product helicase-primase subunit | 98678-98695 4:01:01 CCGTCTCCTGGTCCACCC      |
| 98717                                          | 98744 | 96983 | 99238 | CDS product helicase-primase subunit | 98717-98744 4:01:01                         |

|                                                                  |        |        |        |                                      |                                                 |
|------------------------------------------------------------------|--------|--------|--------|--------------------------------------|-------------------------------------------------|
| GGGAGACTGGCATTGTGGACTTTGTGGG                                     |        |        |        |                                      |                                                 |
| 98749                                                            | 98814  | 96983  | 99238  | CDS product helicase-primase subunit | 98749-98814 13:10:03                            |
| CCCGCCAAGAGCCGCGCCGAAAGGCCGCAAGTCCAGCCTGGCGAGCCTCCTTGCCGCCGCTGCC |        |        |        |                                      |                                                 |
| 98850                                                            | 98876  | 96983  | 99238  | CDS product helicase-primase subunit | 98850-98876 5:02:01                             |
| GGCGGCGGCGCGGAGGCGTGCGAGGG                                       |        |        |        |                                      |                                                 |
| 98889                                                            | 98922  | 96983  | 99238  | CDS product helicase-primase subunit | 98889-98922 5:02:01                             |
| GGCGTTTGCGGAGCGGGCAACCCGAGTTTGG                                  |        |        |        |                                      |                                                 |
| 98948                                                            | 98964  | 96983  | 99238  | CDS product helicase-primase subunit | 98948-98964 5:02:01 CCCCCCTCCCCCGGCC            |
| 98974                                                            | 99002  | 96983  | 99238  | CDS product helicase-primase subunit | 98974-99002 5:02:01                             |
| GGAGGGGCCGTGCTGGACCTGGACCGCGG                                    |        |        |        |                                      |                                                 |
| 99110                                                            | 99123  | 96983  | 99238  | CDS product helicase-primase subunit | 99110-99123 4:01:01 CCCACCTAACCCCC              |
| 99606                                                            | 99632  | 99332  | 100267 | CDS product tegument protein UL7     | 99606-99632 5:02:01 GGCTCTGGTCAAAGGGGCTGTGGCTGG |
| 99825                                                            | 99838  | 99332  | 100267 | CDS product tegument protein UL7     | 99825-99838 4:01:01 GGTTGGTGGGCCGG              |
| 99933                                                            | 99952  | 99332  | 100267 | CDS product tegument protein UL7     | 99933-99952 5:02:01 GGAAGGCGGGCAGGTCCAGG        |
| 100079                                                           | 100096 | 99332  | 100267 | CDS product tegument protein UL7     | 100079-100096 4:01:01 CCGTCGACCTCCCGGACC        |
| 100209                                                           | 100228 | 99332  | 100267 | CDS product tegument protein UL7     | 100209-100228 4:01:01 CCAGGGGATCCAGCCCCTCC      |
| 100489                                                           | 100505 | 100044 | 102290 | CDS product capsid portal protein    | 100489-100505 4:01:01 GGTGGCGGGCCCGCAGG         |
| 100651                                                           | 100669 | 100044 | 102290 | CDS product capsid portal protein    | 100651-100669 4:01:01 GGTCGGCAGCGTAGGGGGG       |
| 100738                                                           | 100766 | 100044 | 102290 | CDS product capsid portal protein    | 100738-100766 6:03:01                           |
| CCTCGTGTCCTCAAGCCGTCCGCGGCCGCC                                   |        |        |        |                                      |                                                 |
| 100795                                                           | 100843 | 100044 | 102290 | CDS product capsid portal protein    | 100795-100843 8:05:02                           |
| CCGCCTGCGAAGCCTGGACCAGGCGCTCCCTGGCCGGGCCAGCTCACC                 |        |        |        |                                      |                                                 |
| 100978                                                           | 100995 | 100044 | 102290 | CDS product capsid portal protein    | 100978-100995 4:01:01 GGACCGGCTGGGCGCCGG        |

|        |        |        |        |                                               |               |         |                         |
|--------|--------|--------|--------|-----------------------------------------------|---------------|---------|-------------------------|
| 100992 | 101026 | 100044 | 102290 | CDS product capsid portal protein             | 100992-101026 | 5:02:01 |                         |
|        |        |        |        | CCGGCAGCCCGTGGGCGCCCGCTCTGTCCGAAGCC           |               |         |                         |
| 101041 | 101057 | 100044 | 102290 | CDS product capsid portal protein             | 101041-101057 | 4:01:01 | CCACCTGCGATCCGCCC       |
| 101209 | 101243 | 100044 | 102290 | CDS product capsid portal protein             | 101209-101243 | 8:05:02 |                         |
|        |        |        |        | CCACCGCCTTGGACGCCACCCAGGCCCCCTGTCC            |               |         |                         |
| 101621 | 101644 | 100044 | 102290 | CDS product capsid portal protein             | 101621-101644 | 6:03:01 | GGGGGGTGGGCGTCTGGGGGGGG |
| 101661 | 101680 | 100044 | 102290 | CDS product capsid portal protein             | 101661-101680 | 5:02:01 | GGGTGGACGGCGGATCCCGG    |
| 101741 | 101772 | 100044 | 102290 | CDS product capsid portal protein             | 101741-101772 | 5:02:01 |                         |
|        |        |        |        | GGCGAAGCTGGCGGTCCGTCGGGCTCGCTGG               |               |         |                         |
| 101860 | 101876 | 100044 | 102290 | CDS product capsid portal protein             | 101860-101876 | 4:01:01 | CCCGCACCGCCTCGGCC       |
| 101926 | 101940 | 100044 | 102290 | CDS product capsid portal protein             | 101926-101940 | 4:01:01 | GGCCGGACAGGTGGG         |
| 101983 | 102021 | 100044 | 102290 | CDS product capsid portal protein             | 101983-102021 | 8:05:02 |                         |
|        |        |        |        | GGGTGTTGGTTAGGATGGTCGTCTGGATCTGGCGGATGG       |               |         |                         |
| 102022 | 102036 | 100044 | 102290 | CDS product capsid portal protein             | 102022-102036 | 4:01:01 | CCGCCTCCGTGGACC         |
| 102133 | 102146 | 100044 | 102290 | CDS product capsid portal protein             | 102133-102146 | 4:01:01 | CCCATCCCCCGTCC          |
| 102160 | 102184 | 100044 | 102290 | CDS product capsid portal protein             | 102160-102184 | 4:01:01 |                         |
|        |        |        |        | CCTGGTCATCCGCGTCCGCGCGGCC                     |               |         |                         |
| 102209 | 102234 | 100044 | 102290 | CDS product capsid portal protein             | 102209-102234 | 5:02:01 |                         |
|        |        |        |        | CCGCTTCCGCTCCCGCCCGGCACCC                     |               |         |                         |
| 102262 | 102279 | 100044 | 102290 | CDS product capsid portal protein             | 102262-102279 | 4:01:01 | GGGGGGGAGGCCGCATGG      |
| 102294 | 102319 | 102277 | 104922 | CDS product helicase-primase helicase subunit | 102294-102319 | 5:02:01 |                         |
|        |        |        |        | GGCGAGGGGCGCGACGGCCGCGGCGG                    |               |         |                         |
| 102372 | 102396 | 102277 | 104922 | CDS product helicase-primase helicase subunit | 102372-102396 | 4:01:01 |                         |

|                             |                                               |               |         |  |  |  |
|-----------------------------|-----------------------------------------------|---------------|---------|--|--|--|
| GGCGCGGAGTCTGAGGATTACTCGG   |                                               |               |         |  |  |  |
| 102458 102476 102277 104922 | CDS product helicase-primase helicase subunit | 102458-102476 | 4:01:01 |  |  |  |
| CCGCATCCGGGCCCTGGCC         |                                               |               |         |  |  |  |
| 102466 102486 102277 104922 | CDS product helicase-primase helicase subunit | 102466-102486 | 4:01:01 |  |  |  |
| GGGCCCTGGCCGAAAGACGG        |                                               |               |         |  |  |  |
| 102489 102508 102277 104922 | CDS product helicase-primase helicase subunit | 102489-102508 | 5:02:01 |  |  |  |
| CCCGCCGCCCGCGTGCCGCC        |                                               |               |         |  |  |  |
| 102666 102684 102277 104922 | CDS product helicase-primase helicase subunit | 102666-102684 | 4:01:01 |  |  |  |
| GGGGCGACGCGGGTGGCGG         |                                               |               |         |  |  |  |
| 102761 102783 102277 104922 | CDS product helicase-primase helicase subunit | 102761-102783 | 4:01:01 |  |  |  |
| CCGCGGAAACCACGTCCAGGCC      |                                               |               |         |  |  |  |
| 102814 102827 102277 104922 | CDS product helicase-primase helicase subunit | 102814-102827 | 4:01:01 |  |  |  |
| CCAACCCCTCCC                |                                               |               |         |  |  |  |
| 102969 102987 102277 104922 | CDS product helicase-primase helicase subunit | 102969-102987 | 4:01:01 |  |  |  |
| GGGTCGCTGGCCGGGCTGG         |                                               |               |         |  |  |  |
| 103051 103074 102277 104922 | CDS product helicase-primase helicase subunit | 103051-103074 | 5:02:01 |  |  |  |
| CCGGCCTGCTGGGCCGACACTCC     |                                               |               |         |  |  |  |
| 103451 103466 102277 104922 | CDS product helicase-primase helicase subunit | 103451-103466 | 4:01:01 |  |  |  |
| CCCCGCCAACCTACCC            |                                               |               |         |  |  |  |
| 103538 103553 102277 104922 | CDS product helicase-primase helicase subunit | 103538-103553 | 4:01:01 |  |  |  |
| GGTATCCGGGGGGGGG            |                                               |               |         |  |  |  |
| 103748 103770 102277 104922 | CDS product helicase-primase helicase subunit | 103748-103770 | 6:03:01 |  |  |  |
| GGGGGTGGTGGTGGCGGAACGG      |                                               |               |         |  |  |  |

|                                                 |        |        |        |                                               |               |         |                                  |
|-------------------------------------------------|--------|--------|--------|-----------------------------------------------|---------------|---------|----------------------------------|
| 104092                                          | 104103 | 102277 | 104922 | CDS product helicase-primase helicase subunit | 104092-104103 | 4:01:01 | GGGAGGAGGGGG                     |
| 104141                                          | 104175 | 102277 | 104922 | CDS product helicase-primase helicase subunit | 104141-104175 | 6:03:01 |                                  |
| GGCGGCCGGGACGACTGGGGCGAGGACGACGTGG              |        |        |        |                                               |               |         |                                  |
| 104522                                          | 104546 | 102277 | 104922 | CDS product helicase-primase helicase subunit | 104522-104546 | 4:01:01 |                                  |
| GGGTATCGCGGAGCTCCTGGGCGGG                       |        |        |        |                                               |               |         |                                  |
| 104966                                          | 104985 | 104945 | 105661 | CDS product nuclear protein UL4               | 104966-104985 | 5:02:01 | CCGCGGCCTCCCCGTAACC              |
| 105277                                          | 105293 | 104945 | 105661 | CDS product nuclear protein UL4               | 105277-105293 | 4:01:01 | GGCTGGGTGGCCGTGGG                |
| 105412                                          | 105433 | 104945 | 105661 | CDS product nuclear protein UL4               | 105412-105433 | 4:01:01 | GGGTCCAGCGGCGAGGAACCGG           |
| 105430                                          | 105447 | 104945 | 105661 | CDS product nuclear protein UL4               | 105430-105447 | 4:01:01 | CCGGAGCCCGCCTGCCCC               |
| 105492                                          | 105514 | 104945 | 105661 | CDS product nuclear protein UL4               | 105492-105514 | 5:02:01 | CCGTGCCCCGAGACCGAGGCC            |
| 105556                                          | 105592 | 104945 | 105661 | CDS product nuclear protein UL4               | 105556-105592 | 7:04:01 |                                  |
| GGGTTTGGGGTTCTGCGGACTGGCCCGGGCAGCGG             |        |        |        |                                               |               |         |                                  |
| 105809                                          | 105858 | 105782 | 106288 | CDS product protein V57                       | 105809-105858 | 9:06:02 |                                  |
| GGCCTATGGTGGGTTCGGGGTTGGGGTTAGAGGCGGGTAGGGCGCGG |        |        |        |                                               |               |         |                                  |
| 105894                                          | 105909 | 105782 | 106288 | CDS product protein V57                       | 105894-105909 | 4:01:01 | CCTCCTTGCCGCCCC                  |
| 105975                                          | 106006 | 105782 | 106288 | CDS product protein V57                       | 105975-106006 | 6:03:01 | GGTCGCCGGCTCGGGTTGTGGACTTTCGGTGG |
| 106084                                          | 106102 | 105782 | 106288 | CDS product protein V57                       | 106084-106102 | 4:01:01 | CCTATCGCCCGCGGCTGCC              |
| 106135                                          | 106155 | 105782 | 106288 | CDS product protein V57                       | 106135-106155 | 4:01:01 | CCGTGCCGGGCGCCGGGGCC             |
| 106167                                          | 106183 | 105782 | 106288 | CDS product protein V57                       | 106167-106183 | 4:01:01 | GGGCGTGCGGCGGCTGG                |
| 106631                                          | 106656 | 106335 | 106964 | CDS product nuclear protein UL3               | 106631-106656 | 6:03:01 | GGAGGAGGTTTTGGTGCAGGCAATGG       |
| 106839                                          | 106876 | 106335 | 106964 | CDS product nuclear protein UL3               | 106839-106876 | 7:04:01 |                                  |
| GGGGAAGCGCCGGGCGGGCCGGCAAAAGCGGACGGCGG          |        |        |        |                                               |               |         |                                  |
| 106898                                          | 106914 | 106335 | 106964 | CDS product nuclear protein UL3               | 106898-106914 | 4:01:01 | GGCCGCGGCCTGGGCGG                |

|                                                                       |        |        |        |     |         |                          |               |          |                        |
|-----------------------------------------------------------------------|--------|--------|--------|-----|---------|--------------------------|---------------|----------|------------------------|
| 106921                                                                | 106939 | 106335 | 106964 | CDS | product | nuclear protein UL3      | 106921-106939 | 5:02:01  | CCGCCCACCCCCACTCCCC    |
| 107091                                                                | 107108 | 107048 | 107995 | CDS | product | uracil-DNA glycosylase   | 107091-107108 | 4:01:01  | GGTAGGCGTTGGCGTCGG     |
| 107145                                                                | 107165 | 107048 | 107995 | CDS | product | uracil-DNA glycosylase   | 107145-107165 | 4:01:01  | GGGGCGACGGGTGGCCGTAGG  |
| 107311                                                                | 107332 | 107048 | 107995 | CDS | product | uracil-DNA glycosylase   | 107311-107332 | 4:01:01  | CCCCGGCTGTCCGCGCCGACC  |
| 107358                                                                | 107388 | 107048 | 107995 | CDS | product | uracil-DNA glycosylase   | 107358-107388 | 5:02:01  |                        |
| CCCCCTGGAGGGCCCACTTTTCCAGGTAGCC                                       |        |        |        |     |         |                          |               |          |                        |
| 107382                                                                | 107401 | 107048 | 107995 | CDS | product | uracil-DNA glycosylase   | 107382-107401 | 4:01:01  | GGTAGCCGTGGCGGGGAGG    |
| 107448                                                                | 107463 | 107048 | 107995 | CDS | product | uracil-DNA glycosylase   | 107448-107463 | 4:01:01  | GGCTTGGGGGAAGTGG       |
| 107487                                                                | 107511 | 107048 | 107995 | CDS | product | uracil-DNA glycosylase   | 107487-107511 | 5:02:01  |                        |
| CCAGCCCGTGCGCTGGCCGGGGCC                                              |        |        |        |     |         |                          |               |          |                        |
| 107502                                                                | 107527 | 107048 | 107995 | CDS | product | uracil-DNA glycosylase   | 107502-107527 | 5:02:01  |                        |
| GGCCGGGGCCGTGGTAGGGTCCTGG                                             |        |        |        |     |         |                          |               |          |                        |
| 107589                                                                | 107611 | 107048 | 107995 | CDS | product | uracil-DNA glycosylase   | 107589-107611 | 5:02:01  | CCTTTCCCGGCAGAACCTCTCC |
| 107679                                                                | 107699 | 107048 | 107995 | CDS | product | uracil-DNA glycosylase   | 107679-107699 | 5:02:01  | GGATGGAGCGCCAGGCGGGGG  |
| 107718                                                                | 107736 | 107048 | 107995 | CDS | product | uracil-DNA glycosylase   | 107718-107736 | 5:02:01  | CCAGCTCCTCCCAGCCCCC    |
| 107876                                                                | 107985 | 107048 | 107995 | CDS | product | uracil-DNA glycosylase   | 107876-107985 | 22:19:05 |                        |
| GGCGGGCGCTTGGGGGGCGGGGGCGGCGGGCGGGCGGCTCAGGGCTTTTTTGGGGCGGGCGGGCGTCCG |        |        |        |     |         |                          |               |          |                        |
| 108311                                                                | 108327 | 107955 | 108593 | CDS | product | envelope glycoprotein L  | 108311-108327 | 4:01:01  | GGGGGGGGCGCAGTTGG      |
| 108430                                                                | 108444 | 107955 | 108593 | CDS | product | envelope glycoprotein L  | 108430-108444 | 4:01:01  | CCGCCCTGGGCCCCC        |
| 108479                                                                | 108494 | 107955 | 108593 | CDS | product | envelope glycoprotein L  | 108479-108494 | 4:01:01  | GGAGGCCGGCCAAGGG       |
| 108484                                                                | 108503 | 107955 | 108593 | CDS | product | envelope glycoprotein L  | 108484-108503 | 4:01:01  | CCGGCCAAGGGCCCGCACC    |
| 108550                                                                | 108564 | 107955 | 108593 | CDS | product | envelope glycoprotein L  | 108550-108564 | 4:01:01  | CCCCAGCTCCCCC          |
| 113705                                                                | 113718 | 113644 | 115263 | CDS | product | ubiquitin E3 ligase ICP0 | 113705-113718 | 4:01:01  | GGAAAGGCGGCCGG         |

|                                                                                                                                     |                                           |
|-------------------------------------------------------------------------------------------------------------------------------------|-------------------------------------------|
| 113752 113782 113644 115263 CDS product ubiquitin E3 ligase ICPO<br>GGGCGCCGGGCGACCGGTAAGGGTTGGGG                                   | 113752-113782 5:02:01                     |
| 113790 113851 113644 115263 CDS product ubiquitin E3 ligase ICPO<br>CCTCCCGGCACCACGCACCACCCGCCGCTAGCCTGGCCGCCCTCTCCTCGGTCCAGCGCC    | 113790-113851 12:09:03                    |
| 113860 113889 113644 115263 CDS product ubiquitin E3 ligase ICPO<br>CCCTTCAACCGGCGCCTGGCGCCCCCGCC                                   | 113860-113889 6:03:01                     |
| 113892 113921 113644 115263 CDS product ubiquitin E3 ligase ICPO<br>GGCGGGGGGCGCGGTCCCGCCGGGCTGAGG                                  | 113892-113921 6:03:01                     |
| 113922 113938 113644 115263 CDS product ubiquitin E3 ligase ICPO                                                                    | 113922-113938 4:01:01 CCGAAAACCCTCCACCC   |
| 114019 114054 113644 115263 CDS product ubiquitin E3 ligase ICPO<br>CCGACGCCGTACCTCGGCCCGCTCCGGGGGAACCC                             | 114019-114054 6:03:01                     |
| 114060 114107 113644 115263 CDS product ubiquitin E3 ligase ICPO<br>GGGGGGGCGAGGGCTGCGGGGCGAGGTTTTGGGCGCGCCGGTGGG                   | 114060-114107 10:07:02                    |
| 114117 114138 113644 115263 CDS product ubiquitin E3 ligase ICPO<br>GGAAGTGCGGGCAAGGGGCGGG                                          | 114117-114138 4:01:01                     |
| 114167 114189 113644 115263 CDS product ubiquitin E3 ligase ICPO<br>CCGTAAACGCCTGCCCGGGGGCC                                         | 114167-114189 4:01:01                     |
| 114183 114248 113644 115263 CDS product ubiquitin E3 ligase ICPO<br>GGGGGCCGGGGTGGCTCGCGGGCCGGGCTGGGTAGGCGGCCACCCGGGCGGGCAGGCGGCCGG | 114183-114248 14:11:03                    |
| 114414 114431 113644 115263 CDS product ubiquitin E3 ligase ICPO                                                                    | 114414-114431 5:02:01 GGCCCTGGCCGGCGGGGG  |
| 114500 114520 113644 115263 CDS product ubiquitin E3 ligase ICPO<br>GGTGGACGAGCGGCGAGTGGG                                           | 114500-114520 4:01:01                     |
| 114650 114668 113644 115263 CDS product ubiquitin E3 ligase ICPO                                                                    | 114650-114668 4:01:01 CCACGCCGCGCGCCCGGCC |

|                                                                                                                     |                                           |
|---------------------------------------------------------------------------------------------------------------------|-------------------------------------------|
| 114665 114694 113644 115263 CDS product ubiquitin E3 ligase ICP0<br>GGCCGGGGTGCGGCACAGCGGGGGCCGG                    | 114665-114694 6:03:01                     |
| 114705 114725 113644 115263 CDS product ubiquitin E3 ligase ICP0<br>CCGGGCCTCGGCCACCAGCCC                           | 114705-114725 5:02:01                     |
| 114909 114931 113644 115263 CDS product ubiquitin E3 ligase ICP0<br>GGGCGCCCCGGCGTTCCGTTGG                          | 114909-114931 4:01:01                     |
| 114997 115015 113644 115263 CDS product ubiquitin E3 ligase ICP0                                                    | 114997-115015 4:01:01 GGGGGAGTAGGCGTGAGGG |
| 115043 115071 113644 115263 CDS product ubiquitin E3 ligase ICP0<br>CCACGGGCCCTCCGTTTACCGCGTTTCC                    | 115043-115071 5:02:01                     |
| 115166 115196 113644 115263 CDS product ubiquitin E3 ligase ICP0<br>GGCATACGTGGCAGAAGCGGTGGAGACACGG                 | 115166-115196 5:02:01                     |
| 115236 115257 113644 115263 CDS product ubiquitin E3 ligase ICP0<br>GGCACACGGGTTTTCTGCGGG                           | 115236-115257 4:01:01                     |
| 118353 118377 118285 122433 CDS product transcriptional regulator ICP4<br>GGGCCCCGCGGGCCCCGCGCCGGGG                 | 118353-118377 4:01:01                     |
| 118356 118400 118285 122433 CDS product transcriptional regulator ICP4<br>CCCGCGGGCCCCGCGCGGGGCGCCGCTGCCGCCGCGGGCCC | 118356-118400 7:04:01                     |
| 118437 118458 118285 122433 CDS product transcriptional regulator ICP4<br>CCCGCCGCGCGCGTCCGTCTCC                    | 118437-118458 5:02:01                     |
| 118505 118527 118285 122433 CDS product transcriptional regulator ICP4<br>CCACGGCCCCGGCCGCCAGCACC                   | 118505-118527 5:02:01                     |
| 118607 118644 118285 122433 CDS product transcriptional regulator ICP4<br>CCGTGCGGCGGCCTCGAGGTCCGGCTCCAGCAGCGCC     | 118607-118644 6:03:01                     |



|                                   |        |        |        |                                            |               |         |
|-----------------------------------|--------|--------|--------|--------------------------------------------|---------------|---------|
| 118612                            | 118631 | 118285 | 122433 | CDS product transcriptional regulator ICP4 | 118612-118631 | 4:01:01 |
| GGGCCGGCCTCGAGGTCCGG              |        |        |        |                                            |               |         |
| 118668                            | 118696 | 118285 | 122433 | CDS product transcriptional regulator ICP4 | 118668-118696 | 6:03:01 |
| GGGCGGCAGCAGGTCCGCGGGCGGCGG       |        |        |        |                                            |               |         |
| 118703                            | 118728 | 118285 | 122433 | CDS product transcriptional regulator ICP4 | 118703-118728 | 4:01:01 |
| CCAGCGCGCCGCGGCGCCGCGGCC          |        |        |        |                                            |               |         |
| 118715                            | 118748 | 118285 | 122433 | CDS product transcriptional regulator ICP4 | 118715-118748 | 7:04:01 |
| GGCGGCCGCGGCCAGGTAGAGCGGACGCAGCGG |        |        |        |                                            |               |         |
| 118766                            | 118782 | 118285 | 122433 | CDS product transcriptional regulator ICP4 | 118766-118782 | 4:01:01 |
| GGTTGGCCGCGGGTGG                  |        |        |        |                                            |               |         |
| 118821                            | 118840 | 118285 | 122433 | CDS product transcriptional regulator ICP4 | 118821-118840 | 4:01:01 |
| GGCCAGGCCCCGGCTCTGGG              |        |        |        |                                            |               |         |
| 118883                            | 118907 | 118285 | 122433 | CDS product transcriptional regulator ICP4 | 118883-118907 | 5:02:01 |
| GGCGGTAGTCCCGGGCGGCATGGG          |        |        |        |                                            |               |         |
| 118937                            | 118959 | 118285 | 122433 | CDS product transcriptional regulator ICP4 | 118937-118959 | 4:01:01 |
| CCACCACGTAGGCCACGTTGCCC           |        |        |        |                                            |               |         |
| 119157                            | 119174 | 118285 | 122433 | CDS product transcriptional regulator ICP4 | 119157-119174 | 4:01:01 |
| GGCCGGGCCGTCGGCGGG                |        |        |        |                                            |               |         |
| 119211                            | 119229 | 118285 | 122433 | CDS product transcriptional regulator ICP4 | 119211-119229 | 4:01:01 |
| CCGGCGCCGGGCGGAGCCC               |        |        |        |                                            |               |         |
| 119249                            | 119276 | 118285 | 122433 | CDS product transcriptional regulator ICP4 | 119249-119276 | 4:01:01 |
| CCACGCAGCCCGCAAGGCCAGGTCCCC       |        |        |        |                                            |               |         |
| 119265                            | 119281 | 118285 | 122433 | CDS product transcriptional regulator ICP4 | 119265-119281 | 4:01:01 |

|                                                                                         |        |        |        |                                            |               |                       |
|-----------------------------------------------------------------------------------------|--------|--------|--------|--------------------------------------------|---------------|-----------------------|
| GGCCAGGTCCCCGGTGG                                                                       |        |        |        |                                            |               |                       |
| 119329                                                                                  | 119347 | 118285 | 122433 | CDS product transcriptional regulator ICP4 | 119329-119347 | 4:01:01               |
| CCGGTCCAGTTGCCGCCCC                                                                     |        |        |        |                                            |               |                       |
| 119434                                                                                  | 119459 | 118285 | 122433 | CDS product transcriptional regulator ICP4 | 119434-119459 | 6:03:01               |
| CCGCCCTCGCGCCCCCGCGCCGCC                                                                |        |        |        |                                            |               |                       |
| 119470                                                                                  | 119489 | 118285 | 122433 | CDS product transcriptional regulator ICP4 | 119470-119489 | 4:01:01               |
| CCGCCCAGCAGGTCCTCGCC                                                                    |        |        |        |                                            |               |                       |
| 119490                                                                                  | 119508 | 118285 | 122433 | CDS product transcriptional regulator ICP4 | 119490-119508 | 5:02:01               |
| GGGCAGGGGTGGTAGAGG                                                                      |        |        |        |                                            |               |                       |
| 119553                                                                                  | 119584 | 118285 | 122433 | CDS product transcriptional regulator ICP4 | 119553-119584 | 7:04:01               |
| GGCGGCGCGGCGCGCAGCGGGCCGCTGGGGG                                                         |        |        |        |                                            |               |                       |
| 119605                                                                                  | 119632 | 118285 | 122433 | CDS product transcriptional regulator ICP4 | 119605-119632 | 4:01:01               |
| CCCTCGCGGGCCGGGGCCCCGTGCGCC                                                             |        |        |        |                                            |               |                       |
| 119633                                                                                  | 119678 | 118285 | 122433 | CDS product transcriptional regulator ICP4 | 119633-119678 | 8:05:02               |
| GGGCGGCACGGTCGCCAGGGCGCGGGTCAAGGTAGCGCGGG                                               |        |        |        |                                            |               |                       |
| 119679                                                                                  | 119691 | 118285 | 122433 | CDS product transcriptional regulator ICP4 | 119679-119691 | 4:01:01 CCGCCATGCCTCC |
| 119718                                                                                  | 119778 | 118285 | 122433 | CDS product transcriptional regulator ICP4 | 119718-119778 | 10:07:02              |
| GGCCACGGTCTCGGGGAGCAGTAGGCCGCGCGGGCGCCTCGCCGGGCGCGGCGTGTGG                              |        |        |        |                                            |               |                       |
| 119813                                                                                  | 119905 | 118285 | 122433 | CDS product transcriptional regulator ICP4 | 119813-119905 | 18:15:04              |
| GGGGGTGCGGGCCGCCGCGGGCATGGGGCCAGGGCGCGAGGCGGGGGGCGCGGGCCGGCGCTTGGGTGCCGGCGGGTGGCGCCCCGG |        |        |        |                                            |               |                       |
| 119937                                                                                  | 119958 | 118285 | 122433 | CDS product transcriptional regulator ICP4 | 119937-119958 | 5:02:01               |
| GGGGCGCGGCGGCTCGGAGCGG                                                                  |        |        |        |                                            |               |                       |
| 119964                                                                                  | 119983 | 118285 | 122433 | CDS product transcriptional regulator ICP4 | 119964-119983 | 4:01:01               |

|                                                                                   |               |          |  |  |  |  |
|-----------------------------------------------------------------------------------|---------------|----------|--|--|--|--|
| CCCCCGCTGCCTGGGGCGCC                                                              |               |          |  |  |  |  |
| 119988 120046 118285 122433 CDS product transcriptional regulator ICP4            | 119988-120046 | 10:07:02 |  |  |  |  |
| GGGAAGGCGTCCCAGGCAGCGGGGGACGCGCCTCCGAGGCCTCGGGAGGCCCCGGG                          |               |          |  |  |  |  |
| 120055 120084 118285 122433 CDS product transcriptional regulator ICP4            | 120055-120084 | 8:05:02  |  |  |  |  |
| GGGGAGGCGCAGGGGGCGGCGGGGCGCGGG                                                    |               |          |  |  |  |  |
| 120094 120177 118285 122433 CDS product transcriptional regulator ICP4            | 120094-120177 | 17:14:04 |  |  |  |  |
| GGGGACGGGGCCCGGTGCGCGCCGGGCTCGGAGGGCCCGCGGCTGGGGCTGCGGCGGGTGGGCCACAGGGGCGGCAGGTGG |               |          |  |  |  |  |
| 120208 120244 118285 122433 CDS product transcriptional regulator ICP4            | 120208-120244 | 6:03:01  |  |  |  |  |
| GGCCGGGGCGCGCCGGGAGCGCGCGACGGCCTCGG                                               |               |          |  |  |  |  |
| 120239 120261 118285 122433 CDS product transcriptional regulator ICP4            | 120239-120261 | 5:02:01  |  |  |  |  |
| CCTCGGCCATCTGCCGGGCCGCC                                                           |               |          |  |  |  |  |
| 120293 120313 118285 122433 CDS product transcriptional regulator ICP4            | 120293-120313 | 4:01:01  |  |  |  |  |
| GGGTCCAGGCCGAGGCGCGGG                                                             |               |          |  |  |  |  |
| 120328 120355 118285 122433 CDS product transcriptional regulator ICP4            | 120328-120355 | 4:01:01  |  |  |  |  |
| GGGTTGTACCGGACGAGCGGGGCGACGG                                                      |               |          |  |  |  |  |
| 120418 120442 118285 122433 CDS product transcriptional regulator ICP4            | 120418-120442 | 4:01:01  |  |  |  |  |
| CCGGGGTCCTGCGGGCCAGGAGCC                                                          |               |          |  |  |  |  |
| 120477 120507 118285 122433 CDS product transcriptional regulator ICP4            | 120477-120507 | 7:04:01  |  |  |  |  |
| GGCCGCGGCGGCGGCCCGAGGCCGCGGGG                                                     |               |          |  |  |  |  |
| 120491 120512 118285 122433 CDS product transcriptional regulator ICP4            | 120491-120512 | 4:01:01  |  |  |  |  |
| CCCGGAGGCCGCGGGGTTGCC                                                             |               |          |  |  |  |  |
| 120518 120546 118285 122433 CDS product transcriptional regulator ICP4            | 120518-120546 | 6:03:01  |  |  |  |  |
| GGGCCTCCGGGGGCGAGCGGGCGTCGGG                                                      |               |          |  |  |  |  |

|                                                           |        |        |        |                                            |               |          |                |
|-----------------------------------------------------------|--------|--------|--------|--------------------------------------------|---------------|----------|----------------|
| 120555                                                    | 120580 | 118285 | 122433 | CDS product transcriptional regulator ICP4 | 120555-120580 | 6:03:01  |                |
| GGGCTGGAGGCCGGGACGGCCGCGG                                 |        |        |        |                                            |               |          |                |
| 120575                                                    | 120595 | 118285 | 122433 | CDS product transcriptional regulator ICP4 | 120575-120595 | 4:01:01  |                |
| CCGCGGCGCCTCCGCGGAGCC                                     |        |        |        |                                            |               |          |                |
| 120615                                                    | 120637 | 118285 | 122433 | CDS product transcriptional regulator ICP4 | 120615-120637 | 5:02:01  |                |
| GGCGTGGCAGGCGAGGACGCAGG                                   |        |        |        |                                            |               |          |                |
| 120641                                                    | 120668 | 118285 | 122433 | CDS product transcriptional regulator ICP4 | 120641-120668 | 6:03:01  |                |
| CCCCAGCTCCTTGACCCGGGCGCCCC                                |        |        |        |                                            |               |          |                |
| 120678                                                    | 120715 | 118285 | 122433 | CDS product transcriptional regulator ICP4 | 120678-120715 | 6:03:01  |                |
| CCGCGCCGCCCGGGCTCCCCGGGCTCCCCGGGCGCCC                     |        |        |        |                                            |               |          |                |
| 120690                                                    | 120717 | 118285 | 122433 | CDS product transcriptional regulator ICP4 | 120690-120717 | 4:01:01  |                |
| GGGCTCCCCGGGCTCCCCGGGCGCCCGG                              |        |        |        |                                            |               |          |                |
| 120764                                                    | 120820 | 118285 | 122433 | CDS product transcriptional regulator ICP4 | 120764-120820 | 11:08:02 |                |
| GGGCCCCGGGCCTGCGGCGGGGAGCGCGGCCCGGCCGTCGGGGAGGAGGAGGAGG   |        |        |        |                                            |               |          |                |
| 120830                                                    | 120886 | 118285 | 122433 | CDS product transcriptional regulator ICP4 | 120830-120886 | 13:10:03 |                |
| GGGGCGAGGGGGCGGCGGGTCCGGGGCCCGGCGGCGAGCCGGGCTCGGCGGCGGGGG |        |        |        |                                            |               |          |                |
| 120900                                                    | 120913 | 118285 | 122433 | CDS product transcriptional regulator ICP4 | 120900-120913 | 4:01:01  | GGGCCGGGGAAGG  |
| 120927                                                    | 120948 | 118285 | 122433 | CDS product transcriptional regulator ICP4 | 120927-120948 | 4:01:01  |                |
| GGCCCCGGCGCAGGCTCTGCAGG                                   |        |        |        |                                            |               |          |                |
| 120968                                                    | 120997 | 118285 | 122433 | CDS product transcriptional regulator ICP4 | 120968-120997 | 5:02:01  |                |
| GGTCGTATCGGCGGCTCATGGCCACCGAGG                            |        |        |        |                                            |               |          |                |
| 120989                                                    | 121002 | 118285 | 122433 | CDS product transcriptional regulator ICP4 | 120989-121002 | 4:01:01  | CCACCGAGGCCGCC |
| 121234                                                    | 121251 | 118285 | 122433 | CDS product transcriptional regulator ICP4 | 121234-121251 | 4:01:01  |                |

|                                                                        |               |          |
|------------------------------------------------------------------------|---------------|----------|
| CCCGAGTCCCCATCTCC                                                      |               |          |
| 121263 121282 118285 122433 CDS product transcriptional regulator ICP4 | 121263-121282 | 4:01:01  |
| GGGCACGGGCCCCGCGCGG                                                    |               |          |
| 121322 121355 118285 122433 CDS product transcriptional regulator ICP4 | 121322-121355 | 6:03:01  |
| CCCAGAGCCCCTCCCGCGAGTCCCCGGTGCCCC                                      |               |          |
| 121367 121412 118285 122433 CDS product transcriptional regulator ICP4 | 121367-121412 | 9:06:02  |
| GGCCCTTGGGCGGCGGGTCGGAGCCCGCCAGGGGTCCCCGGCCGG                          |               |          |
| 121390 121410 118285 122433 CDS product transcriptional regulator ICP4 | 121390-121410 | 4:01:01  |
| CCCGGCCAGGGGTCCCCGGCC                                                  |               |          |
| 121421 121492 118285 122433 CDS product transcriptional regulator ICP4 | 121421-121492 | 12:09:03 |
| GGGGCTCCGCGGGGCGGCCGCGGGCTCCCGGGCGGCGTCGGGGCCCGGGCCGAGGGCGGCGCGCGCCGG  |               |          |
| 121427 121450 118285 122433 CDS product transcriptional regulator ICP4 | 121427-121450 | 4:01:01  |
| CCGCGGGGCCGCGCGGGCTCCC                                                 |               |          |
| 121516 121553 118285 122433 CDS product transcriptional regulator ICP4 | 121516-121553 | 8:05:02  |
| GGCTGCTGGGGCAGGGGCGGCGAGGAGGGGTGCGGCGG                                 |               |          |
| 121568 121638 118285 122433 CDS product transcriptional regulator ICP4 | 121568-121638 | 13:10:03 |
| GGGGCGAGGACGATCGGCGGGCGGGACGGGGTTCGCGGGGCGGCCTGGAGGAACGCGGGCACCGGCCGG  |               |          |
| 121653 121723 118285 122433 CDS product transcriptional regulator ICP4 | 121653-121723 | 14:11:03 |
| GGAGGCCCCCGAGGGCGGCGGGCGGGCCCCGAGGGCGGCGGGCGGGCCCCGCGGGAGGGCGAAGGGG    |               |          |
| 121796 121817 118285 122433 CDS product transcriptional regulator ICP4 | 121796-121817 | 4:01:01  |
| GGTCTCCGGGCGGGAGAGCCGG                                                 |               |          |
| 121827 121846 118285 122433 CDS product transcriptional regulator ICP4 | 121827-121846 | 6:03:01  |
| GGGCGGCGGGGACGGCGGG                                                    |               |          |

|                                                                                                                       |        |        |        |                                            |               |          |                    |
|-----------------------------------------------------------------------------------------------------------------------|--------|--------|--------|--------------------------------------------|---------------|----------|--------------------|
| 121857                                                                                                                | 121879 | 118285 | 122433 | CDS product transcriptional regulator ICP4 | 121857-121879 | 5:02:01  |                    |
| GGACGGGGCGGGCGGCGTCGG                                                                                                 |        |        |        |                                            |               |          |                    |
| 121893                                                                                                                | 122014 | 118285 | 122433 | CDS product transcriptional regulator ICP4 | 121893-122014 | 24:21:06 |                    |
| GGCGGAGTCCGAGCGGAGGAGCCAGAGGAGGAGGACGCGGACGAGGACGAGGAGCAGGAGGCGCTCCGGGCGCGGGGGGCTCGACGGCGGGAGGCGGACGCGGGAGCGGAGGGGTGG |        |        |        |                                            |               |          |                    |
| 122050                                                                                                                | 122091 | 118285 | 122433 | CDS product transcriptional regulator ICP4 | 122050-122091 | 7:04:01  |                    |
| CCGTCCCCTTCGACCTCCGTGGTCTCCATCTCGGCCCGGACC                                                                            |        |        |        |                                            |               |          |                    |
| 122113                                                                                                                | 122136 | 118285 | 122433 | CDS product transcriptional regulator ICP4 | 122113-122136 | 5:02:01  |                    |
| CCCGCCGGCTCCCCGCCGGGGGCC                                                                                              |        |        |        |                                            |               |          |                    |
| 122130                                                                                                                | 122192 | 118285 | 122433 | CDS product transcriptional regulator ICP4 | 122130-122192 | 13:10:03 |                    |
| GGGGCCGGCGAGGGACCGTCGGCGGGGCGGCGGCTTGGTGGGCGGCGGCCTGCTTGGG                                                            |        |        |        |                                            |               |          |                    |
| 122201                                                                                                                | 122254 | 118285 | 122433 | CDS product transcriptional regulator ICP4 | 122201-122254 | 13:10:03 |                    |
| GGGGCTCCGGCGGCGGCGGAGCCGGGAGGCGGGGATGGCGGGGATGGCGGGG                                                                  |        |        |        |                                            |               |          |                    |
| 122276                                                                                                                | 122300 | 118285 | 122433 | CDS product transcriptional regulator ICP4 | 122276-122300 | 4:01:01  |                    |
| CCACCCGAAGAGCCCTGGCTCCC                                                                                               |        |        |        |                                            |               |          |                    |
| 122306                                                                                                                | 122326 | 118285 | 122433 | CDS product transcriptional regulator ICP4 | 122306-122326 | 4:01:01  |                    |
| GGAGGTCGGGGTGCTGCTGGG                                                                                                 |        |        |        |                                            |               |          |                    |
| 122337                                                                                                                | 122361 | 118285 | 122433 | CDS product transcriptional regulator ICP4 | 122337-122361 | 6:03:01  |                    |
| GGCGGCACCGGCGGCCCGATGAGG                                                                                              |        |        |        |                                            |               |          |                    |
| 126116                                                                                                                | 126133 | 126077 | 127144 | CDS product regulatory protein ICP22       | 126116-126133 | 5:02:01  | CCTGCCGCCTGCGCCCCC |
| 126142                                                                                                                | 126247 | 126077 | 127144 | CDS product regulatory protein ICP22       | 126142-126247 | 23:20:05 |                    |
| CCCCCAGCCCCCTCATCCCGCTCTGTCCGCTCGCCCCCGCTCCGGCGCCACCGCCCCCTCCTGGCGCGCCTCCCTCTCCCCACGCCCGGCTCCGCCCCC                   |        |        |        |                                            |               |          |                    |
| 126277                                                                                                                | 126304 | 126077 | 127144 | CDS product regulatory protein ICP22       | 126277-126304 | 5:02:01  |                    |
| GGGGGGCGGACCACCGGAGTACGGG                                                                                             |        |        |        |                                            |               |          |                    |

126307 126351 126077 127144 CDS product regulatory protein ICP22  
 CCCGTCTCGCCCCGCGCCTCGCCCCGCGCCTCGCCGGCGGGCCC

126390 126421 126077 127144 CDS product regulatory protein ICP22  
 CCGCCTCGCCGCGCGCCTGAACCGCCTCTTCC

126630 126649 126077 127144 CDS product regulatory protein ICP22

126703 126741 126077 127144 CDS product regulatory protein ICP22  
 CCCTCCCCGTCTCCGCTCGTCGTCTCCGCCCCCTCC

126772 126784 126077 127144 CDS product regulatory protein ICP22

126825 126842 126077 127144 CDS product regulatory protein ICP22

126860 126876 126077 127144 CDS product regulatory protein ICP22

126897 126931 126077 127144 CDS product regulatory protein ICP22  
 CCCGCCCTCCTCCCCGAGACGCCGCCGTGCTCC

126964 126997 126077 127144 CDS product regulatory protein ICP22  
 CCCCCCTCCTCCCCGAGACGCCGCCGTGCTCC

127007 127021 126077 127144 CDS product regulatory protein ICP22

127030 127074 126077 127144 CDS product regulatory protein ICP22  
 CCCCCCTTCTCCCCGTTGCCCTCCTCCTCCCCGAGACGCCGCC

127097 127115 126077 127144 CDS product regulatory protein ICP22

127103 127125 126077 127144 CDS product regulatory protein ICP22  
 CCCGCGGCCGCGGCCGTCCCGCC

127339 127359 127330 127995 CDS product virion protein US10

127462 127494 127330 127995 CDS product virion protein US10  
 CCGCCTCCGCCGAGGCCGCCGAGGCCCTGCGCC

126307-126351 7:04:01

126390-126421 7:04:01

126630-126649 4:01:01 CCTCGACCCCCCGAGCCCC

126703-126741 10:07:02

126772-126784 4:01:01 GGCGAGGAGGAGG

126825-126842 5:02:01 GGACGGGGGCTTTGGCGG

126860-126876 4:01:01 CCACCGGCCGCTGGACC

126897-126931 8:05:02

126964-126997 8:05:02

127007-127021 4:01:01 CCCGCCGCGCCGCC

127030-127074 10:07:02

127097-127115 4:01:01 GGAAGCCCCGCGCCGCGG

127103-127125 5:02:01

127339-127359 4:01:01 CCTCGGTCTCCCCATGGCCC

127462-127494 8:05:02

|                                                    |        |        |        |                                  |
|----------------------------------------------------|--------|--------|--------|----------------------------------|
| 127503                                             | 127525 | 127330 | 127995 | CDS product virion protein US10  |
| 127567                                             | 127616 | 127330 | 127995 | CDS product virion protein US10  |
| CCGCCGGGCCCTCGCCCGTCTTCCACTCGGCCGACCCGCTGCGCCGCGCC |        |        |        |                                  |
| 127645                                             | 127667 | 127330 | 127995 | CDS product virion protein US10  |
| 127775                                             | 127794 | 127330 | 127995 | CDS product virion protein US10  |
| 127838                                             | 127854 | 127330 | 127995 | CDS product virion protein US10  |
| 127869                                             | 127905 | 127330 | 127995 | CDS product virion protein US10  |
| CCGCGCCACGCGGCCCGCCCGCTACCTGCGCGCCC                |        |        |        |                                  |
| 127906                                             | 127917 | 127330 | 127995 | CDS product virion protein US10  |
| 127920                                             | 127936 | 127330 | 127995 | CDS product virion protein US10  |
| 127948                                             | 127968 | 127330 | 127995 | CDS product virion protein US10  |
| 127964                                             | 127988 | 127330 | 127995 | CDS product virion protein US10  |
| 128370                                             | 128391 | 128351 | 128707 | CDS product membrane protein US9 |
| 128409                                             | 128434 | 128351 | 128707 | CDS product membrane protein US9 |
| CCACGACCAGCGCCACGCCGGCGACC                         |        |        |        |                                  |
| 128439                                             | 128455 | 128351 | 128707 | CDS product membrane protein US9 |
| 128555                                             | 128568 | 128351 | 128707 | CDS product membrane protein US9 |
| 128591                                             | 128629 | 128351 | 128707 | CDS product membrane protein US9 |
| CCCCCGGGGGCGCCGCCACGGTCGCCTCCAGGCCACAC             |        |        |        |                                  |
| 128836                                             | 128879 | 128805 | 129599 | CDS product virion protein V67   |
| GGTTGGCGGGCGTGGGCGGCGGGTTTGGCCAAACGGGCACGGG        |        |        |        |                                  |
| 128974                                             | 128995 | 128805 | 129599 | CDS product virion protein V67   |
| 129228                                             | 129240 | 128805 | 129599 | CDS product virion protein V67   |

|               |         |                         |
|---------------|---------|-------------------------|
| 127503-127525 | 5:02:01 | CCCCGCCCCAGGGCCTGTGGCC  |
| 127567-127616 | 9:06:02 |                         |
| 127645-127667 | 5:02:01 | CCGCGCGCCCCGCCGCGCACGCC |
| 127775-127794 | 4:01:01 | GGCCCGGCTCGGCATCGGGG    |
| 127838-127854 | 4:01:01 | GGAGCTGGCCGGGGCGG       |
| 127869-127905 | 8:05:02 |                         |
| 127906-127917 | 4:01:01 | GGGGCGGGCGG             |
| 127920-127936 | 5:02:01 | CCGCTCCCGCCGCCCC        |
| 127948-127968 | 4:01:01 | GGCCCCGCGCGGGGACCCGG    |
| 127964-127988 | 5:02:01 | CCCGCCGCGCTCCGGGAGACCCC |
| 128370-128391 | 4:01:01 | CCAGGAACGCCCGGCCACGCC   |
| 128409-128434 | 5:02:01 |                         |
| 128439-128455 | 4:01:01 | GGGCGCACTGGCGGCGG       |
| 128555-128568 | 4:01:01 | CCGCCCGCCCCGCC          |
| 128591-128629 | 8:05:02 |                         |
| 128836-128879 | 9:06:02 |                         |
| 128974-128995 | 5:02:01 | GGGGAGCGGCAGGGGCCTGGG   |
| 129228-129240 | 4:01:01 | GGGGCAGGAAGG            |



|                                            |        |        |        |                                |
|--------------------------------------------|--------|--------|--------|--------------------------------|
| 129258                                     | 129285 | 128805 | 129599 | CDS product virion protein V67 |
| 129452                                     | 129485 | 128805 | 129599 | CDS product virion protein V67 |
| CCTTCGCGCCCGCCGCGCCGGCCTCCGCGGCC           |        |        |        |                                |
| 129467                                     | 129487 | 128805 | 129599 | CDS product virion protein V67 |
| 129500                                     | 129537 | 128805 | 129599 | CDS product virion protein V67 |
| GGCGGGCTCTCTGGAGTCAGCGCGTCTTGGCGCTGGG      |        |        |        |                                |
| 129563                                     | 129573 | 128805 | 129599 | CDS product virion protein V67 |
| 129764                                     | 129792 | 129705 | 130700 | CDS product virion protein US2 |
| CCGCGCCCCGACGCCCCCTTCACTCCCCC              |        |        |        |                                |
| 129838                                     | 129863 | 129705 | 130700 | CDS product virion protein US2 |
| 129890                                     | 129918 | 129705 | 130700 | CDS product virion protein US2 |
| GGAGCGCGGGGTGGGCGCGGAGCCCGGGG              |        |        |        |                                |
| 129956                                     | 129997 | 129705 | 130700 | CDS product virion protein US2 |
| GGGGGTGGCTGGCGTGGCGCGCCCGGGGACGTGGCGGAGGGG |        |        |        |                                |
| 130087                                     | 130113 | 129705 | 130700 | CDS product virion protein US2 |
| 130129                                     | 130140 | 129705 | 130700 | CDS product virion protein US2 |
| 130179                                     | 130196 | 129705 | 130700 | CDS product virion protein US2 |
| 130186                                     | 130207 | 129705 | 130700 | CDS product virion protein US2 |
| 130230                                     | 130244 | 129705 | 130700 | CDS product virion protein US2 |
| 130271                                     | 130286 | 129705 | 130700 | CDS product virion protein US2 |
| 130330                                     | 130343 | 129705 | 130700 | CDS product virion protein US2 |
| 130485                                     | 130506 | 129705 | 130700 | CDS product virion protein US2 |
| 130595                                     | 130631 | 129705 | 130700 | CDS product virion protein US2 |

|               |         |                              |
|---------------|---------|------------------------------|
| 129258-129285 | 6:03:01 | CCCTCCACCTTCACCTCGCCGTACAGCC |
| 129452-129485 | 7:04:01 |                              |
| 129467-129487 | 4:01:01 | GGCGCCGGCCTCCGCGGCCGG        |
| 129500-129537 | 6:03:01 |                              |
| 129563-129573 | 4:01:01 | GGCGGCGGAGG                  |
| 129764-129792 | 6:03:01 |                              |
| 129838-129863 | 4:01:01 | CCGGGGGGGCCCCGGGCGCCGCAGCC   |
| 129890-129918 | 6:03:01 |                              |
| 129956-129997 | 9:06:02 |                              |
| 130087-130113 | 5:02:01 | CCACCGCGTAGACCATGCGGCCACCC   |
| 130129-130140 | 4:01:01 | GGTCGGCGGGGG                 |
| 130179-130196 | 4:01:01 | GGCACGGCCGAAACCGG            |
| 130186-130207 | 4:01:01 | CCGGAACCGGCGACCGCATCC        |
| 130230-130244 | 4:01:01 | CCGGGCCACTCCTCC              |
| 130271-130286 | 4:01:01 | GGCCCCGGGAGGAGG              |
| 130330-130343 | 4:01:01 | GGTGGTAGGGCGG                |
| 130485-130506 | 4:01:01 | GGCCTGCAGGGCTTCGGTAGGG       |
| 130595-130631 | 6:03:01 |                              |

|                                                                             |               |         |  |
|-----------------------------------------------------------------------------|---------------|---------|--|
| CCGCGCCAAAACTCCCACAGGTGCCCGTCCACGTCC                                        |               |         |  |
| 130940 130957 130842 132023 CDS product serine/threonine protein kinase US3 | 130940-130957 | 4:01:01 |  |
| CCCgATGCCCCCCCAGCC                                                          |               |         |  |
| 130959 130982 130842 132023 CDS product serine/threonine protein kinase US3 | 130959-130982 | 6:03:01 |  |
| GGGGTGGGCCCGGTCGGGGGGCGG                                                    |               |         |  |
| 131092 131116 130842 132023 CDS product serine/threonine protein kinase US3 | 131092-131116 | 5:02:01 |  |
| CCTCGTCCCCTCCAGGTCCAAGGCC                                                   |               |         |  |
| 131200 131219 130842 132023 CDS product serine/threonine protein kinase US3 | 131200-131219 | 5:02:01 |  |
| GGAGGGGGAGGACGAGACGG                                                        |               |         |  |
| 131348 131366 130842 132023 CDS product serine/threonine protein kinase US3 | 131348-131366 | 4:01:01 |  |
| CCCCACTACCGGTCCGACC                                                         |               |         |  |
| 131397 131417 130842 132023 CDS product serine/threonine protein kinase US3 | 131397-131417 | 4:01:01 |  |
| CCATCCCGCTCGACCGGGCCC                                                       |               |         |  |
| 131547 131575 130842 132023 CDS product serine/threonine protein kinase US3 | 131547-131575 | 5:02:01 |  |
| CCGCCAGGTACCCCGTCGACGCCCGGCC                                                |               |         |  |
| 131572 131600 130842 132023 CDS product serine/threonine protein kinase US3 | 131572-131600 | 5:02:01 |  |
| GGCCGAGCTGGGAATAGCCGGGACGGTGG                                               |               |         |  |
| 131850 131870 130842 132023 CDS product serine/threonine protein kinase US3 | 131850-131870 | 4:01:01 |  |
| CCACCCGAGAGCGCCGGCCCC                                                       |               |         |  |
| 131968 131984 130842 132023 CDS product serine/threonine protein kinase US3 | 131968-131984 | 4:01:01 |  |
| GGCGGCGGAGCTGCTGG                                                           |               |         |  |
| 132258 132288 132158 133504 CDS product envelope glycoprotein G             | 132258-132288 | 5:02:01 |  |
| CCCTGAGCCATGGCCCCTGCTCCCGGGCCCC                                             |               |         |  |

|                                                 |        |        |        |                                     |
|-------------------------------------------------|--------|--------|--------|-------------------------------------|
| 132716                                          | 132736 | 132158 | 133504 | CDS product envelope glycoprotein G |
| 132960                                          | 132982 | 132158 | 133504 | CDS product envelope glycoprotein G |
| 133148                                          | 133164 | 132158 | 133504 | CDS product envelope glycoprotein G |
| 133207                                          | 133229 | 132158 | 133504 | CDS product envelope glycoprotein G |
| 133758                                          | 133781 | 133704 | 135005 | CDS product envelope glycoprotein J |
| 133822                                          | 133836 | 133704 | 135005 | CDS product envelope glycoprotein J |
| 133913                                          | 133927 | 133704 | 135005 | CDS product envelope glycoprotein J |
| 133973                                          | 134008 | 133704 | 135005 | CDS product envelope glycoprotein J |
| CCCGCCTTCACCGCCCTCGCAACCCGGAACCGGCC             |        |        |        |                                     |
| 134055                                          | 134083 | 133704 | 135005 | CDS product envelope glycoprotein J |
| CCGCCGAGGAAACCCCAACGCATCCGCCC                   |        |        |        |                                     |
| 134124                                          | 134155 | 133704 | 135005 | CDS product envelope glycoprotein J |
| CCACCACGCCCTTCGCCGAGCCGGCTCCACC                 |        |        |        |                                     |
| 134165                                          | 134212 | 133704 | 135005 | CDS product envelope glycoprotein J |
| CCCGCCCTCTCTACCACCAAGCGGCCCGGTGCCGCCCGGCAGCGCCC |        |        |        |                                     |
| 134237                                          | 134262 | 133704 | 135005 | CDS product envelope glycoprotein J |
| CCCGCTCCGATCACGCCCCCGGCC                        |        |        |        |                                     |
| 134393                                          | 134413 | 133704 | 135005 | CDS product envelope glycoprotein J |
| 134427                                          | 134459 | 133704 | 135005 | CDS product envelope glycoprotein J |
| GGGGCGTTATGGTGGACGTGGTGGTTGGAACGG               |        |        |        |                                     |
| 134622                                          | 134638 | 133704 | 135005 | CDS product envelope glycoprotein J |
| 134667                                          | 134699 | 133704 | 135005 | CDS product envelope glycoprotein J |
| GGCCCGTGGTCAGGTGGACAGTGGCGGCGCGGG               |        |        |        |                                     |

|               |         |                          |
|---------------|---------|--------------------------|
| 132716-132736 | 4:01:01 | CCCGCGACCACCTGCGAGACC    |
| 132960-132982 | 4:01:01 | CCTTGCCAGGGGCCCTCAATCCC  |
| 133148-133164 | 4:01:01 | CCCCCGCTTCTCCCACC        |
| 133207-133229 | 5:02:01 | CCAACCCAGCGCCACCGGCCCC   |
| 133758-133781 | 5:02:01 | GGTACGGCCTTCCCGGCGCGGAGG |
| 133822-133836 | 4:01:01 | GGACGGAGGGGAGGG          |
| 133913-133927 | 4:01:01 | CCGCCACCCCTGTCC          |
| 133973-134008 | 7:04:01 |                          |
| 134055-134083 | 5:02:01 |                          |
| 134124-134155 | 7:04:01 |                          |
| 134165-134212 | 8:05:02 |                          |
| 134237-134262 | 5:02:01 |                          |
| 134393-134413 | 4:01:01 | GGCATGGGAACCCGGCGCAGG    |
| 134427-134459 | 7:04:01 |                          |
| 134622-134638 | 4:01:01 | CCTCCGGGGACCGCGCC        |
| 134667-134699 | 7:04:01 |                          |

|                                                           |        |        |        |                                     |               |          |                         |
|-----------------------------------------------------------|--------|--------|--------|-------------------------------------|---------------|----------|-------------------------|
| 134741                                                    | 134757 | 133704 | 135005 | CDS product envelope glycoprotein J | 134741-134757 | 4:01:01  | GGCCCGGGGAGTGCGG        |
| 134782                                                    | 134825 | 133704 | 135005 | CDS product envelope glycoprotein J | 134782-134825 | 7:04:01  |                         |
| CCCCGCTATGCCCCGCGCCGACCCGACGGCCTCTGCGTCCTACC              |        |        |        |                                     |               |          |                         |
| 134839                                                    | 134860 | 133704 | 135005 | CDS product envelope glycoprotein J | 134839-134860 | 5:02:01  | CCCCCGGGCGGCCAGACCACC   |
| 135129                                                    | 135187 | 135101 | 136321 | CDS product envelope glycoprotein D | 135129-135187 | 10:07:02 |                         |
| CCTCGGCCTCCTGCTGGCCCTGCTGGCCCGCCGTCGCCGGGGCCACTGGCCCCGGCC |        |        |        |                                     |               |          |                         |
| 135244                                                    | 135268 | 135101 | 136321 | CDS product envelope glycoprotein D | 135244-135268 | 5:02:01  |                         |
| CCGCTGCCAAAGTTCCACCTCCCC                                  |        |        |        |                                     |               |          |                         |
| 135594                                                    | 135616 | 135101 | 136321 | CDS product envelope glycoprotein D | 135594-135616 | 4:01:01  | GGACTACGTGGTGGACACGTCCG |
| 135643                                                    | 135660 | 135101 | 136321 | CDS product envelope glycoprotein D | 135643-135660 | 5:02:01  | CCGCCGCCGGGCGCCGCC      |
| 135849                                                    | 135867 | 135101 | 136321 | CDS product envelope glycoprotein D | 135849-135867 | 4:01:01  | CCAGCCGACCACATCGCC      |
| 135938                                                    | 135954 | 135101 | 136321 | CDS product envelope glycoprotein D | 135938-135954 | 4:01:01  | CCAAACCCGCGCCCCC        |
| 136008                                                    | 136034 | 135101 | 136321 | CDS product envelope glycoprotein D | 136008-136034 | 6:03:01  |                         |
| CCGTCCACAATCCGGACCTCCGCATCC                               |        |        |        |                                     |               |          |                         |
| 136044                                                    | 136062 | 135101 | 136321 | CDS product envelope glycoprotein D | 136044-136062 | 4:01:01  | CCCGCCACCAGACGCACCC     |
| 136125                                                    | 136151 | 135101 | 136321 | CDS product envelope glycoprotein D | 136125-136151 | 5:02:01  |                         |
| GGGCGGAAAGTCCGGGGAAGACCGGG                                |        |        |        |                                     |               |          |                         |
| 136188                                                    | 136206 | 135101 | 136321 | CDS product envelope glycoprotein D | 136188-136206 | 4:01:01  | CCTAGCCCTGGCCGGTGCC     |
| 136260                                                    | 136276 | 135101 | 136321 | CDS product envelope glycoprotein D | 136260-136276 | 4:01:01  | GGTGGGAGGCATTGGGG       |
| 136469                                                    | 136489 | 136427 | 137770 | CDS product envelope glycoprotein I | 136469-136489 | 4:01:01  | CCCTCGGCGCCGCGCGCCC     |
| 136760                                                    | 136781 | 136427 | 137770 | CDS product envelope glycoprotein I | 136760-136781 | 4:01:01  | CCAGGACCACCACGGCGACCC   |
| 136945                                                    | 136964 | 136427 | 137770 | CDS product envelope glycoprotein I | 136945-136964 | 4:01:01  | GGGGAGGGAGAAGGCAACGG    |
| 136975                                                    | 137028 | 136427 | 137770 | CDS product envelope glycoprotein I | 136975-137028 | 10:07:02 |                         |

|                                                       |        |        |        |                                     |               |                                  |
|-------------------------------------------------------|--------|--------|--------|-------------------------------------|---------------|----------------------------------|
| CCAACGCCCCGCCCCCGAGCGACCCCCGTCTGCTCCCGCCACACCGACGCCC  |        |        |        |                                     |               |                                  |
| 137038                                                | 137061 | 136427 | 137770 | CDS product envelope glycoprotein I | 137038-137061 | 5:02:01 CCAACCGCGGCCGCAACCGAAGCC |
| 137072                                                | 137105 | 136427 | 137770 | CDS product envelope glycoprotein I | 137072-137105 | 7:04:01                          |
| CCGCGGCGACCTTTATCGCCACCCCCGCCCCACC                    |        |        |        |                                     |               |                                  |
| 137151                                                | 137165 | 136427 | 137770 | CDS product envelope glycoprotein I | 137151-137165 | 4:01:01 GGTGCAGGTCGGCGG          |
| 137268                                                | 137289 | 136427 | 137770 | CDS product envelope glycoprotein I | 137268-137289 | 5:02:01 GGAGGAAGACGGCGCCGGTGGG   |
| 137315                                                | 137366 | 136427 | 137770 | CDS product envelope glycoprotein I | 137315-137366 | 11:08:02                         |
| CCACCGGCGGAGCGGCCACGACCAACAACCGCCCCACCAACCACCCCC      |        |        |        |                                     |               |                                  |
| 137514                                                | 137538 | 136427 | 137770 | CDS product envelope glycoprotein I | 137514-137538 | 5:02:01                          |
| CCGCCGCATTTACGCCCCGGCTCC                              |        |        |        |                                     |               |                                  |
| 137533                                                | 137569 | 136427 | 137770 | CDS product envelope glycoprotein I | 137533-137569 | 7:04:01                          |
| GGCTCCGGGCTCGGGCCTGGTACGGCCGCGGAGCTGG                 |        |        |        |                                     |               |                                  |
| 137570                                                | 137592 | 136427 | 137770 | CDS product envelope glycoprotein I | 137570-137592 | 4:01:01 CCACGCTCGCCGCTCGCCCGCC   |
| 137603                                                | 137634 | 136427 | 137770 | CDS product envelope glycoprotein I | 137603-137634 | 6:03:01                          |
| CCTCGGAGTCCCTCGCATCCGAGCGCGCCGCC                      |        |        |        |                                     |               |                                  |
| 137645                                                | 137661 | 136427 | 137770 | CDS product envelope glycoprotein I | 137645-137661 | 4:01:01 CCGCGTCCGCGCCCCC         |
| 137690                                                | 137717 | 136427 | 137770 | CDS product envelope glycoprotein I | 137690-137717 | 5:02:01                          |
| CCTCGAAGCCCGGGCAGCCCCCGATCC                           |        |        |        |                                     |               |                                  |
| 138089                                                | 138110 | 138046 | 139713 | CDS product envelope glycoprotein E | 138089-138110 | 4:01:01 CCTGGCGCCAGCCTTTGGGACC   |
| 138162                                                | 138215 | 138046 | 139713 | CDS product envelope glycoprotein E | 138162-138215 | 8:05:02                          |
| GGGGGCACGCTCGGCGTTCCGGACAACGGGACCTCGGGGTGCTCAAGGCCTGG |        |        |        |                                     |               |                                  |
| 138211                                                | 138232 | 138046 | 139713 | CDS product envelope glycoprotein E | 138211-138232 | 4:01:01 CCTGGACCTTCCTGGAAACCCC   |
| 138341                                                | 138374 | 138046 | 139713 | CDS product envelope glycoprotein E | 138341-138374 | 7:04:01                          |

|                                                   |        |        |        |                                            |               |                                 |
|---------------------------------------------------|--------|--------|--------|--------------------------------------------|---------------|---------------------------------|
| CCCCCTGGCCCTGGCCGAGTTCACCGCCGCAGCC                |        |        |        |                                            |               |                                 |
| 138426                                            | 138453 | 138046 | 139713 | CDS product envelope glycoprotein E        | 138426-138453 | 4:01:01                         |
| CCCATTTTGACCGAAACCCGAAGCGGCC                      |        |        |        |                                            |               |                                 |
| 138472                                            | 138485 | 138046 | 139713 | CDS product envelope glycoprotein E        | 138472-138485 | 4:01:01 CCACCAACCTCACC          |
| 138567                                            | 138616 | 138046 | 139713 | CDS product envelope glycoprotein E        | 138567-138616 | 10:07:02                        |
| CCCAAGCCGTCCGCGGCACCCGCGCCACGCCGACCACGACCGCCGCGCC |        |        |        |                                            |               |                                 |
| 138940                                            | 138962 | 138046 | 139713 | CDS product envelope glycoprotein E        | 138940-138962 | 5:02:01 CCATCCAGTGCCACAGCACCCCC |
| 139067                                            | 139091 | 138046 | 139713 | CDS product envelope glycoprotein E        | 139067-139091 | 5:02:01                         |
| GGTCAACGGACACCCGGAGGCGTGG                         |        |        |        |                                            |               |                                 |
| 139138                                            | 139160 | 138046 | 139713 | CDS product envelope glycoprotein E        | 139138-139160 | 5:02:01 CCGACACCACCCGCCACGGCCC  |
| 139209                                            | 139232 | 138046 | 139713 | CDS product envelope glycoprotein E        | 139209-139232 | 5:02:01 CCCGCCGAGGTTCCGCCAGTCCC |
| 139233                                            | 139250 | 138046 | 139713 | CDS product envelope glycoprotein E        | 139233-139250 | 4:01:01 GGACGCGGCTGGGCTCGG      |
| 139505                                            | 139553 | 138046 | 139713 | CDS product envelope glycoprotein E        | 139505-139553 | 10:07:02                        |
| CCCGGGACTGCCCGCGCGCCGACTCTCTCCGCTCCCCGCCCCCCC     |        |        |        |                                            |               |                                 |
| 139585                                            | 139604 | 138046 | 139713 | CDS product envelope glycoprotein E        | 139585-139604 | 4:01:01 GGTCCGGATAACAAGGTCTGG   |
| 139616                                            | 139633 | 138046 | 139713 | CDS product envelope glycoprotein E        | 139616-139633 | 4:01:01 CCCCAGCCCTCGCCCCC       |
| 139647                                            | 139661 | 138046 | 139713 | CDS product envelope glycoprotein E        | 139647-139661 | 4:01:01 CCGCCCCGCCAAGCC         |
| 139833                                            | 139864 | 139710 | 140135 | CDS product putative membrane protein US8A | 139833-139864 | 6:03:01                         |
| CCATCAGCCGCTACCGCCGCGGTCCGAGTCC                   |        |        |        |                                            |               |                                 |
| 139937                                            | 139950 | 139710 | 140135 | CDS product putative membrane protein US8A | 139937-139950 | 4:01:01 CCCGACCGCCAACC          |
| 139967                                            | 139986 | 139710 | 140135 | CDS product putative membrane protein US8A | 139967-139986 | 4:01:01                         |
| CCCAACTCTCCGCGCGCGCC                              |        |        |        |                                            |               |                                 |
| 139997                                            | 140020 | 139710 | 140135 | CDS product putative membrane protein US8A | 139997-140020 | 4:01:01                         |

CCAAAGCCCCGCCGAGAAACCC  
 140451 140489 140351 140731 CDS product membrane protein US9  
 GGTGGGCCTGGAGGCGACCGTGGCGGCGCCCCGGGGG  
 140512 140525 140351 140731 CDS product membrane protein US9  
 140625 140641 140351 140731 CDS product membrane protein US9  
 140646 140671 140351 140731 CDS product membrane protein US9  
 GGTCGCCGCGTGGCGCTGGTCGTGG  
 140689 140710 140351 140731 CDS product membrane protein US9  
 141092 141116 141087 141752 CDS product virion protein US10  
 141112 141132 141087 141752 CDS product virion protein US10  
 141144 141160 141087 141752 CDS product virion protein US10  
 141163 141174 141087 141752 CDS product virion protein US10  
 141175 141211 141087 141752 CDS product virion protein US10  
 GGGCGCGCAGGTAGGCGGCGGCGCCGCGTGGCGCGG  
 141226 141242 141087 141752 CDS product virion protein US10  
 141286 141305 141087 141752 CDS product virion protein US10  
 141413 141435 141087 141752 CDS product virion protein US10  
 141464 141513 141087 141752 CDS product virion protein US10  
 GGCGCGGCGCAGCGGGTCGGCCGAGTGGAAGACGGGCGAGGGCCCGGCGG  
 141555 141577 141087 141752 CDS product virion protein US10  
 141586 141618 141087 141752 CDS product virion protein US10  
 GGCGCAGGGCCTCGGCGGCCTCGGCGGAGGCGG  
 141721 141741 141087 141752 CDS product virion protein US10

140451-140489 8:05:02  
 140512-140525 4:01:01 GGCGGGGCGGGCGG  
 140625-140641 4:01:01 CCGCCGCCAGTGC GCCC  
 140646-140671 5:02:01  
 140689-140710 4:01:01 GGCGTGGCCGGGGCGTTCCTGG  
 141092-141116 5:02:01 GGGGGTCTCCCGAGCGCGGCCGGG  
 141112-141132 4:01:01 CCGGGTCCCCGCCGCGGGGCC  
 141144-141160 5:02:01 GGGGCGGCGGGAGCGG  
 141163-141174 4:01:01 CCCGCCGCCCC  
 141175-141211 8:05:02  
 141226-141242 4:01:01 CCGCCCCGCCAGCTCC  
 141286-141305 4:01:01 CCCCAGTCCGAGCCGGGCC  
 141413-141435 5:02:01 GGCGTGCGCGGCGGGCGGCGCGG  
 141464-141513 9:06:02  
 141555-141577 5:02:01 GGCCACAGGCCCTGGGGCGGGG  
 141586-141618 8:05:02  
 141721-141741 4:01:01 GGGCCATGGGGGAGACCGAGG

|                                                                                                                |                                           |
|----------------------------------------------------------------------------------------------------------------|-------------------------------------------|
| 141955 141977 141938 143005 CDS product regulatory protein ICP22<br>GGCGGGACGGCCGCGCCGCGGG                     | 141955-141977 5:02:01                     |
| 141965 141983 141938 143005 CDS product regulatory protein ICP22                                               | 141965-141983 4:01:01 CCGCGGCCGCGGGCCTTCC |
| 142006 142050 141938 143005 CDS product regulatory protein ICP22<br>GGGCGGCGTCTCGGGGAGGAGGAGGGCAACGGGAGAAGGGGG | 142006-142050 10:07:02                    |
| 142059 142073 141938 143005 CDS product regulatory protein ICP22                                               | 142059-142073 4:01:01 GGGCGGCGCGGCGGG     |
| 142083 142116 141938 143005 CDS product regulatory protein ICP22<br>GGAGCACGGGCGGCGTCTCGGGGAGGAGGGGG           | 142083-142116 8:05:02                     |
| 142149 142183 141938 143005 CDS product regulatory protein ICP22<br>GGAGCACGGGCGGCGTCTCGGGGAGGAGGGCGGG         | 142149-142183 8:05:02                     |
| 142204 142220 141938 143005 CDS product regulatory protein ICP22                                               | 142204-142220 4:01:01 GGTCCAGCGGCCGTGG    |
| 142238 142255 141938 143005 CDS product regulatory protein ICP22                                               | 142238-142255 5:02:01 CCGCCAAAGCCCCGTCC   |
| 142296 142308 141938 143005 CDS product regulatory protein ICP22                                               | 142296-142308 4:01:01 CCTCCTCCTCGCC       |
| 142339 142377 141938 143005 CDS product regulatory protein ICP22<br>GGAGGGGCGGAGGACGACGAGGCGGAGGACGGGAGGG      | 142339-142377 10:07:02                    |
| 142431 142450 141938 143005 CDS product regulatory protein ICP22                                               | 142431-142450 4:01:01 GGGGCTCGGGGGGTCGAGG |
| 142659 142690 141938 143005 CDS product regulatory protein ICP22<br>GGAAGAGGCGTTTCAGGCGCGCGGCGAGGCGG           | 142659-142690 7:04:01                     |
| 142729 142773 141938 143005 CDS product regulatory protein ICP22<br>GGGCCCCCGGCGAGGCGCGGGGCGAGGGCGGGGCGAGACGGG | 142729-142773 7:04:01                     |
| 142776 142803 141938 143005 CDS product regulatory protein ICP22<br>CCCCGTACTCCGGGTGGTCCGCCCCCCC               | 142776-142803 5:02:01                     |
| 142833 142938 141938 143005 CDS product regulatory protein ICP22                                               | 142833-142938 23:20:05                    |



GGGGGGCGGAGCCGGGCGTGGGGGAGAGGGAGGCGCGCCAGGAGGGGGCGGTGGCGCCGAGCGGGGGGGCGACGGCGACAGAGGCGGGATGAGGGGGCTGGCGGG

|        |        |        |        |                                                                                                                    |               |          |                    |
|--------|--------|--------|--------|--------------------------------------------------------------------------------------------------------------------|---------------|----------|--------------------|
| 142947 | 142964 | 141938 | 143005 | CDS product regulatory protein ICP22                                                                               | 142947-142964 | 5:02:01  | GGGGGCGCAGGCGGCAGG |
| 146719 | 146743 | 146649 | 150797 | CDS product transcriptional regulator ICP4                                                                         | 146719-146743 | 6:03:01  |                    |
|        |        |        |        | CCTCATCCGGGCCGCCGGTGCCGCC                                                                                          |               |          |                    |
| 146754 | 146774 | 146649 | 150797 | CDS product transcriptional regulator ICP4                                                                         | 146754-146774 | 4:01:01  |                    |
|        |        |        |        | CCCAGCAGCACCCCGACCTCC                                                                                              |               |          |                    |
| 146780 | 146804 | 146649 | 150797 | CDS product transcriptional regulator ICP4                                                                         | 146780-146804 | 4:01:01  |                    |
|        |        |        |        | GGGAGCCAGGGGCTCTTCGGGGTGG                                                                                          |               |          |                    |
| 146826 | 146879 | 146649 | 150797 | CDS product transcriptional regulator ICP4                                                                         | 146826-146879 | 13:10:03 |                    |
|        |        |        |        | CCCCGCCATCCCCGCCATCCCCGCTCCCCGGCTCCGCCGCCGCCGAGCCCC                                                                |               |          |                    |
| 146888 | 146950 | 146649 | 150797 | CDS product transcriptional regulator ICP4                                                                         | 146888-146950 | 13:10:03 |                    |
|        |        |        |        | CCCAAGCAGGCCGCGCCGCCACCAAGCCCGCCCGCCCGACGGTGCCCTCGCCGGCCCCC                                                        |               |          |                    |
| 146944 | 146967 | 146649 | 150797 | CDS product transcriptional regulator ICP4                                                                         | 146944-146967 | 5:02:01  |                    |
|        |        |        |        | GGCCCCCGCGGGGAGCCGGCGGG                                                                                            |               |          |                    |
| 146989 | 147030 | 146649 | 150797 | CDS product transcriptional regulator ICP4                                                                         | 146989-147030 | 7:04:01  |                    |
|        |        |        |        | GGTCCGGGCCGAGATGGAGACCACGGAGGTCTGAAGGGGACGG                                                                        |               |          |                    |
| 147066 | 147187 | 146649 | 150797 | CDS product transcriptional regulator ICP4                                                                         | 147066-147187 | 24:21:06 |                    |
|        |        |        |        | CCACCCCTCCGCTCCCCGCTCCGCCTCCCCGCGTCGAGGCCCCCGCGCGCCGGAGCGCCTCCTGCTCCTCGTCCTCGTCGCTCCTCCTCTGGCTCCTCCGCCTCGGACTCCGCC |               |          |                    |
| 147201 | 147223 | 146649 | 150797 | CDS product transcriptional regulator ICP4                                                                         | 147201-147223 | 5:02:01  |                    |
|        |        |        |        | CCGACGCCGCGCCCGCCCCGTCC                                                                                            |               |          |                    |
| 147234 | 147253 | 146649 | 150797 | CDS product transcriptional regulator ICP4                                                                         | 147234-147253 | 6:03:01  |                    |
|        |        |        |        | CCCGCGTCCCCCGCGCCC                                                                                                 |               |          |                    |
| 147263 | 147284 | 146649 | 150797 | CDS product transcriptional regulator ICP4                                                                         | 147263-147284 | 4:01:01  |                    |

|                                                                        |               |          |                |  |  |  |
|------------------------------------------------------------------------|---------------|----------|----------------|--|--|--|
| CCGGCTCTCCCGCCCGGAGACC                                                 |               |          |                |  |  |  |
| 147357 147427 146649 150797 CDS product transcriptional regulator ICP4 | 147357-147427 | 14:11:03 |                |  |  |  |
| CCCCTTCGCCCTCCCCGCGGGCCCCGCCGCCGCCCTCGGGGGCCCGCCGCCCTCGGGGGCCTCC       |               |          |                |  |  |  |
| 147442 147512 146649 150797 CDS product transcriptional regulator ICP4 | 147442-147512 | 13:10:03 |                |  |  |  |
| CCGGCCGGTGCCCGCGTTCTCCAGGCCGCCCCGGAACCCCGTCCCCGCCCGCCGATCGGTCCTCGCCCC  |               |          |                |  |  |  |
| 147527 147564 146649 150797 CDS product transcriptional regulator ICP4 | 147527-147564 | 8:05:02  |                |  |  |  |
| CCGCCGAGCCCTCCTCGCGCCCCTGCCCCAGCAGCC                                   |               |          |                |  |  |  |
| 147588 147659 146649 150797 CDS product transcriptional regulator ICP4 | 147588-147659 | 12:09:03 |                |  |  |  |
| CCGGCGCCGGCGCCCTCGGGCCCGGGCCCCGACGCCGCCGGAGCCCGCGCCGGCCCCGCGGAGCCCC    |               |          |                |  |  |  |
| 147630 147653 146649 150797 CDS product transcriptional regulator ICP4 | 147630-147653 | 4:01:01  |                |  |  |  |
| GGGAGCCCGCGGCCGCCCCGCGG                                                |               |          |                |  |  |  |
| 147668 147713 146649 150797 CDS product transcriptional regulator ICP4 | 147668-147713 | 9:06:02  |                |  |  |  |
| CCGGCCGGGGACCCCTGGCCGGGCTCCGACCCGCCGCCAAGGGCC                          |               |          |                |  |  |  |
| 147670 147690 146649 150797 CDS product transcriptional regulator ICP4 | 147670-147690 | 4:01:01  |                |  |  |  |
| GGCCGGGGACCCCTGGCCGGG                                                  |               |          |                |  |  |  |
| 147725 147758 146649 150797 CDS product transcriptional regulator ICP4 | 147725-147758 | 6:03:01  |                |  |  |  |
| GGGGGCACCGGGACTCGCGGGAGGGCTCTGGG                                       |               |          |                |  |  |  |
| 147798 147817 146649 150797 CDS product transcriptional regulator ICP4 | 147798-147817 | 4:01:01  |                |  |  |  |
| CCGCCGGCGGGCCCGTGCCC                                                   |               |          |                |  |  |  |
| 147829 147846 146649 150797 CDS product transcriptional regulator ICP4 | 147829-147846 | 4:01:01  |                |  |  |  |
| GGAGATGGGGGACTCGGG                                                     |               |          |                |  |  |  |
| 148078 148091 146649 150797 CDS product transcriptional regulator ICP4 | 148078-148091 | 4:01:01  | GGCGGCCTCGGTGG |  |  |  |
| 148083 148112 146649 150797 CDS product transcriptional regulator ICP4 | 148083-148112 | 5:02:01  |                |  |  |  |

|                                                                        |               |                        |
|------------------------------------------------------------------------|---------------|------------------------|
| CCTCGGTGGCCATGAGCCGCCGATACGACC                                         |               |                        |
| 148132 148153 146649 150797 CDS product transcriptional regulator ICP4 | 148132-148153 | 4:01:01                |
| CCTGCAGAGCCTGCGCCGGGCC                                                 |               |                        |
| 148167 148180 146649 150797 CDS product transcriptional regulator ICP4 | 148167-148180 | 4:01:01 CCTTCCCCCGGCCC |
| 148194 148250 146649 150797 CDS product transcriptional regulator ICP4 | 148194-148250 | 13:10:03               |
| CCCCCGCCGCGAGCCCGGCTCGCCGCCGGGCCCCGGACCCGCCGCCCCCTCGCCCC               |               |                        |
| 148260 148316 146649 150797 CDS product transcriptional regulator ICP4 | 148260-148316 | 11:08:02               |
| CCTCCTCCTCCTCCCGACGGCCGGGCGCCGCGCTCCCCGCCGAGCCCCGGGCCC                 |               |                        |
| 148363 148390 146649 150797 CDS product transcriptional regulator ICP4 | 148363-148390 | 4:01:01                |
| CCGGGCGCCCGGGAGCCCGGGAGCCC                                             |               |                        |
| 148365 148402 146649 150797 CDS product transcriptional regulator ICP4 | 148365-148402 | 6:03:01                |
| GGGCGCCCGGGAGCCCGGGAGCCCGGGCGGCGCGG                                    |               |                        |
| 148412 148439 146649 150797 CDS product transcriptional regulator ICP4 | 148412-148439 | 6:03:01                |
| GGGGGCGCCCGGTCAAGGAGCTGGGGG                                            |               |                        |
| 148443 148465 146649 150797 CDS product transcriptional regulator ICP4 | 148443-148465 | 5:02:01                |
| CCTGCGTCCTCGCCTGCCACGCC                                                |               |                        |
| 148485 148505 146649 150797 CDS product transcriptional regulator ICP4 | 148485-148505 | 4:01:01                |
| GGCTCCGCGGAGGCGCCGCGG                                                  |               |                        |
| 148500 148525 146649 150797 CDS product transcriptional regulator ICP4 | 148500-148525 | 6:03:01                |
| CCGCGCCGTCCCCGGCCTCCAGCCC                                              |               |                        |
| 148534 148562 146649 150797 CDS product transcriptional regulator ICP4 | 148534-148562 | 6:03:01                |
| CCCGACCCCGCCTGCCCCCGGAGGCC                                             |               |                        |
| 148568 148589 146649 150797 CDS product transcriptional regulator ICP4 | 148568-148589 | 4:01:01                |

|                                                                              |        |        |        |                                            |               |          |
|------------------------------------------------------------------------------|--------|--------|--------|--------------------------------------------|---------------|----------|
| GGCAACCCCGCGGCCTCCGGG                                                        |        |        |        |                                            |               |          |
| 148573                                                                       | 148603 | 146649 | 150797 | CDS product transcriptional regulator ICP4 | 148573-148603 | 7:04:01  |
| CCCCGGCGGCCTCCGGGCCGCCGCGGCC                                                 |        |        |        |                                            |               |          |
| 148638                                                                       | 148662 | 146649 | 150797 | CDS product transcriptional regulator ICP4 | 148638-148662 | 4:01:01  |
| GGCTCCTGGGCGCAGGACCCCGG                                                      |        |        |        |                                            |               |          |
| 148725                                                                       | 148752 | 146649 | 150797 | CDS product transcriptional regulator ICP4 | 148725-148752 | 4:01:01  |
| CCGTCGCCCCGCTCGTCCGGTACAACCC                                                 |        |        |        |                                            |               |          |
| 148767                                                                       | 148787 | 146649 | 150797 | CDS product transcriptional regulator ICP4 | 148767-148787 | 4:01:01  |
| CCCGCGCCTCGGCCTGGACCC                                                        |        |        |        |                                            |               |          |
| 148819                                                                       | 148841 | 146649 | 150797 | CDS product transcriptional regulator ICP4 | 148819-148841 | 5:02:01  |
| GGCGGCCCGGCAGATGGCCGAGG                                                      |        |        |        |                                            |               |          |
| 148836                                                                       | 148872 | 146649 | 150797 | CDS product transcriptional regulator ICP4 | 148836-148872 | 6:03:01  |
| CCGAGGCCGTCGCCGCGCTCCCCGGCGCCCCGGCC                                          |        |        |        |                                            |               |          |
| 148903                                                                       | 148986 | 146649 | 150797 | CDS product transcriptional regulator ICP4 | 148903-148986 | 17:14:04 |
| CCACCTGCCGCCCTGTGGGCCACCCGCCGAGCCCCAGCCGCGGGCCCTCCGAGCCCGCGCACCGGGCCCCGTCCCC |        |        |        |                                            |               |          |
| 148996                                                                       | 149025 | 146649 | 150797 | CDS product transcriptional regulator ICP4 | 148996-149025 | 8:05:02  |
| CCCGCCCCCGCCGCCCTGCGCCTCCCC                                                  |        |        |        |                                            |               |          |
| 149034                                                                       | 149092 | 146649 | 150797 | CDS product transcriptional regulator ICP4 | 149034-149092 | 10:07:02 |
| CCCGGGGCTCCCCGAGGCCTCGGAGGCCGCTCCCCCGCTGCCTGGGACGCCTTCCC                     |        |        |        |                                            |               |          |
| 149097                                                                       | 149116 | 146649 | 150797 | CDS product transcriptional regulator ICP4 | 149097-149116 | 4:01:01  |
| GGCGCCCAGGCAGCGGGG                                                           |        |        |        |                                            |               |          |
| 149122                                                                       | 149143 | 146649 | 150797 | CDS product transcriptional regulator ICP4 | 149122-149143 | 5:02:01  |
| CCGCTCCGAGCCCGCGCCCC                                                         |        |        |        |                                            |               |          |

|                                                                                            |        |        |        |                                            |               |          |               |
|--------------------------------------------------------------------------------------------|--------|--------|--------|--------------------------------------------|---------------|----------|---------------|
| 149175                                                                                     | 149267 | 146649 | 150797 | CDS product transcriptional regulator ICP4 | 149175-149267 | 18:15:04 |               |
| CCGGGGCCGCCACCCCGCCGGCACCCAAGCGCCGGCCCGCGCCCCCGCCTCGCGCCCTGGGCCCCATGCCCGCCGGCGGCCCCGACCCCC |        |        |        |                                            |               |          |               |
| 149302                                                                                     | 149362 | 146649 | 150797 | CDS product transcriptional regulator ICP4 | 149302-149362 | 10:07:02 |               |
| CCACACGCCGGCGCCCGGCGAGGCCGCCCGCGCGCCTACTGCTCCCCGAGACCGTGGCC                                |        |        |        |                                            |               |          |               |
| 149389                                                                                     | 149401 | 146649 | 150797 | CDS product transcriptional regulator ICP4 | 149389-149401 | 4:01:01  | GGAGGCATGGCGG |
| 149402                                                                                     | 149447 | 146649 | 150797 | CDS product transcriptional regulator ICP4 | 149402-149447 | 8:05:02  |               |
| CCCGCGCTACCTTCGACCCGGCCGCCCTGGCGACCGTCGCCGCC                                               |        |        |        |                                            |               |          |               |
| 149448                                                                                     | 149475 | 146649 | 150797 | CDS product transcriptional regulator ICP4 | 149448-149475 | 4:01:01  |               |
| GGCGCACGGGGCCCCCGGCCCGGAGGG                                                                |        |        |        |                                            |               |          |               |
| 149496                                                                                     | 149527 | 146649 | 150797 | CDS product transcriptional regulator ICP4 | 149496-149527 | 7:04:01  |               |
| CCCCCAGCGGCCCGCTGCGCCGCCGCGCCGCC                                                           |        |        |        |                                            |               |          |               |
| 149572                                                                                     | 149590 | 146649 | 150797 | CDS product transcriptional regulator ICP4 | 149572-149590 | 5:02:01  |               |
| CCTCTACCACCCCTGCCC                                                                         |        |        |        |                                            |               |          |               |
| 149591                                                                                     | 149610 | 146649 | 150797 | CDS product transcriptional regulator ICP4 | 149591-149610 | 4:01:01  |               |
| GGCGAGGACCTGCTGGGCGG                                                                       |        |        |        |                                            |               |          |               |
| 149621                                                                                     | 149646 | 146649 | 150797 | CDS product transcriptional regulator ICP4 | 149621-149646 | 6:03:01  |               |
| GGCGGCGCGGCGGGCCGCGAGGGCGG                                                                 |        |        |        |                                            |               |          |               |
| 149733                                                                                     | 149751 | 146649 | 150797 | CDS product transcriptional regulator ICP4 | 149733-149751 | 4:01:01  |               |
| GGGCCGGCAACTGGACCGG                                                                        |        |        |        |                                            |               |          |               |
| 149799                                                                                     | 149815 | 146649 | 150797 | CDS product transcriptional regulator ICP4 | 149799-149815 | 4:01:01  |               |
| CCACCGGGGACCTGGCC                                                                          |        |        |        |                                            |               |          |               |
| 149804                                                                                     | 149831 | 146649 | 150797 | CDS product transcriptional regulator ICP4 | 149804-149831 | 4:01:01  |               |
| GGGGACCTGGCCTTCGCGGGCTGCGTGG                                                               |        |        |        |                                            |               |          |               |

|                                       |        |        |        |                                            |               |         |
|---------------------------------------|--------|--------|--------|--------------------------------------------|---------------|---------|
| 149851                                | 149869 | 146649 | 150797 | CDS product transcriptional regulator ICP4 | 149851-149869 | 4:01:01 |
| GGGCTCGGCCCGGCCGG                     |        |        |        |                                            |               |         |
| 149906                                | 149923 | 146649 | 150797 | CDS product transcriptional regulator ICP4 | 149906-149923 | 4:01:01 |
| CCCGCCGACGGCCCGGCC                    |        |        |        |                                            |               |         |
| 150121                                | 150143 | 146649 | 150797 | CDS product transcriptional regulator ICP4 | 150121-150143 | 4:01:01 |
| GGGCAACGTGGCCTACGTGGTGG               |        |        |        |                                            |               |         |
| 150173                                | 150197 | 146649 | 150797 | CDS product transcriptional regulator ICP4 | 150173-150197 | 5:02:01 |
| CCCATGCCGCCCCGGGACTACCGCC             |        |        |        |                                            |               |         |
| 150240                                | 150259 | 146649 | 150797 | CDS product transcriptional regulator ICP4 | 150240-150259 | 4:01:01 |
| CCCAGAGCCGGGGCCTGGCC                  |        |        |        |                                            |               |         |
| 150298                                | 150314 | 146649 | 150797 | CDS product transcriptional regulator ICP4 | 150298-150314 | 4:01:01 |
| CCACCGCGCGGCAACC                      |        |        |        |                                            |               |         |
| 150332                                | 150365 | 146649 | 150797 | CDS product transcriptional regulator ICP4 | 150332-150365 | 7:04:01 |
| CCGCTGCGTCCGCTCTACCTGGCCGCCGGCCGCC    |        |        |        |                                            |               |         |
| 150352                                | 150377 | 146649 | 150797 | CDS product transcriptional regulator ICP4 | 150352-150377 | 4:01:01 |
| GGCCGCCGGCCGCCGCGCGCTGG               |        |        |        |                                            |               |         |
| 150384                                | 150412 | 146649 | 150797 | CDS product transcriptional regulator ICP4 | 150384-150412 | 6:03:01 |
| CCGCCGCGCCCGCGGACCTGCTGCCGCC          |        |        |        |                                            |               |         |
| 150436                                | 150473 | 146649 | 150797 | CDS product transcriptional regulator ICP4 | 150436-150473 | 6:03:01 |
| GGCGCTGCTGGAGCCGACCTCGAGGCCGCCCCGACGG |        |        |        |                                            |               |         |
| 150449                                | 150468 | 146649 | 150797 | CDS product transcriptional regulator ICP4 | 150449-150468 | 4:01:01 |
| CCGGACCTCGAGGCCGCCC                   |        |        |        |                                            |               |         |
| 150553                                | 150575 | 146649 | 150797 | CDS product transcriptional regulator ICP4 | 150553-150575 | 5:02:01 |

GGTGCTGGCGCCGGGGCCGTGG

150622 150643 146649 150797 CDS product transcriptional regulator ICP4

150622-150643 5:02:01

GGAGACGGACGGCGCCGGCGGG

150680 150724 146649 150797 CDS product transcriptional regulator ICP4

150680-150724 7:04:01

GGGCCCCGGGGCGGCAGCGGGCGCCCCGGCGCCGGGGCCCCGCGGG

150703 150727 146649 150797 CDS product transcriptional regulator ICP4

150703-150727 4:01:01

CCCCGGCGCCGGGGCCCCGCGGGCCC
