# Supplementary material for: Intensive Distribution of G2-Quaduplexes in the Pseudorabies Virus Genome and Their Sensitivity to Cations and G-Quadruplex Ligands
Source: MDPI journal article supplement (doi:10.3390/molecules24040774), 2019-02-21
Supplement: s1 [file s1]

|                            |                              |                                                         |
|----------------------------|------------------------------|---------------------------------------------------------|
| capsid maturation protease | gi 9625875 ref NC_001348.1   | Human herpesvirus 3, complete genome                    |
| capsid maturation protease | gi 50313241 ref NC_001491.2  | Equid herpesvirus 1, complete genome                    |
| capsid maturation protease | gi 9629732 ref NC_001844.1   | Equid herpesvirus 4, complete genome                    |
| capsid maturation protease | gi 9629818 ref NC_001847.1   | Bovine herpesvirus 1, complete genome                   |
| capsid maturation protease | gi 126882977 ref NC_002686.2 | Cercopithecine herpesvirus 9, complete genome           |
| capsid maturation protease | gi 123318702 ref NC_005261.2 | Bovine herpesvirus 5, complete genome                   |
| capsid maturation protease | gi 51557483 ref NC_006151.1  | Suid herpesvirus 1, complete genome                     |
| capsid maturation protease | gi 216905852 ref NC_011644.1 | Equid herpesvirus 9, complete genome                    |
| capsid maturation protease | gi 281190771 ref NC_013590.2 | Felid herpesvirus 1, complete genome                    |
| capsid maturation protease | gi 675510705 ref NC_024771.1 | Equid herpesvirus 3 strain AR/2007/C3A, complete genome |
| capsid portal protein      | gi 9625875 ref NC_001348.1   | Human herpesvirus 3, complete genome                    |
| capsid portal protein      | gi 50313241 ref NC_001491.2  | Equid herpesvirus 1, complete genome                    |
| capsid portal protein      | gi 9629732 ref NC_001844.1   | Equid herpesvirus 4, complete genome                    |
| capsid portal protein      | gi 9629818 ref NC_001847.1   | Bovine herpesvirus 1, complete genome                   |
| capsid portal protein      | gi 126882977 ref NC_002686.2 | Cercopithecine herpesvirus 9, complete genome           |
| capsid portal protein      | gi 123318702 ref NC_005261.2 | Bovine herpesvirus 5, complete genome                   |
| capsid portal protein      | gi 51557483 ref NC_006151.1  | Suid herpesvirus 1, complete genome                     |
| capsid portal protein      | gi 216905852 ref NC_011644.1 | Equid herpesvirus 9, complete genome                    |
| capsid portal protein      | gi 281190771 ref NC_013590.2 | Felid herpesvirus 1, complete genome                    |
| capsid portal protein      | gi 386522723 ref NC_017826.1 | Equid herpesvirus 8, complete genome                    |
| capsid portal protein      | gi 675510705 ref NC_024771.1 | Equid herpesvirus 3 strain AR/2007/C3A, complete genome |
| capsid scaffold protein    | gi 9625875 ref NC_001348.1   | Human herpesvirus 3, complete genome                    |
| capsid scaffold protein    | gi 50313241 ref NC_001491.2  | Equid herpesvirus 1, complete genome                    |

|                          |                              |                                                         |
|--------------------------|------------------------------|---------------------------------------------------------|
| capsid scaffold protein  | gi 9629732 ref NC_001844.1   | Equid herpesvirus 4, complete genome                    |
| capsid scaffold protein  | gi 9629818 ref NC_001847.1   | Bovine herpesvirus 1, complete genome                   |
| capsid scaffold protein  | gi 123318702 ref NC_005261.2 | Bovine herpesvirus 5, complete genome                   |
| capsid scaffold protein  | gi 51557483 ref NC_006151.1  | Suid herpesvirus 1, complete genome                     |
| capsid scaffold protein  | gi 216905852 ref NC_011644.1 | Equid herpesvirus 9, complete genome                    |
| capsid scaffold protein  | gi 281190771 ref NC_013590.2 | Felid herpesvirus 1, complete genome                    |
| capsid scaffold protein  | gi 675510705 ref NC_024771.1 | Equid herpesvirus 3 strain AR/2007/C3A, complete genome |
| capsid triplex subunit 1 | gi 9625875 ref NC_001348.1   | Human herpesvirus 3, complete genome                    |
| capsid triplex subunit 1 | gi 50313241 ref NC_001491.2  | Equid herpesvirus 1, complete genome                    |
| capsid triplex subunit 1 | gi 9629732 ref NC_001844.1   | Equid herpesvirus 4, complete genome                    |
| capsid triplex subunit 1 | gi 9629818 ref NC_001847.1   | Bovine herpesvirus 1, complete genome                   |
| capsid triplex subunit 1 | gi 126882977 ref NC_002686.2 | Cercopithecine herpesvirus 9, complete genome           |
| capsid triplex subunit 1 | gi 123318702 ref NC_005261.2 | Bovine herpesvirus 5, complete genome                   |
| capsid triplex subunit 1 | gi 51557483 ref NC_006151.1  | Suid herpesvirus 1, complete genome                     |
| capsid triplex subunit 1 | gi 216905852 ref NC_011644.1 | Equid herpesvirus 9, complete genome                    |
| capsid triplex subunit 1 | gi 281190771 ref NC_013590.2 | Felid herpesvirus 1, complete genome                    |
| capsid triplex subunit 1 | gi 675510705 ref NC_024771.1 | Equid herpesvirus 3 strain AR/2007/C3A, complete genome |
| capsid triplex subunit 2 | gi 9625875 ref NC_001348.1   | Human herpesvirus 3, complete genome                    |
| capsid triplex subunit 2 | gi 50313241 ref NC_001491.2  | Equid herpesvirus 1, complete genome                    |
| capsid triplex subunit 2 | gi 9629732 ref NC_001844.1   | Equid herpesvirus 4, complete genome                    |
| capsid triplex subunit 2 | gi 9629818 ref NC_001847.1   | Bovine herpesvirus 1, complete genome                   |
| capsid triplex subunit 2 | gi 123318702 ref NC_005261.2 | Bovine herpesvirus 5, complete genome                   |
| capsid triplex subunit 2 | gi 51557483 ref NC_006151.1  | Suid herpesvirus 1, complete genome                     |

|                             |                              |                                                         |
|-----------------------------|------------------------------|---------------------------------------------------------|
| capsid triplex subunit 2    | gi 216905852 ref NC_011644.1 | Equid herpesvirus 9, complete genome                    |
| capsid triplex subunit 2    | gi 281190771 ref NC_013590.2 | Felid herpesvirus 1, complete genome                    |
| capsid triplex subunit 2    | gi 675510705 ref NC_024771.1 | Equid herpesvirus 3 strain AR/2007/C3A, complete genome |
| deoxyribonuclease           | gi 9625875 ref NC_001348.1   | Human herpesvirus 3, complete genome                    |
| deoxyribonuclease           | gi 50313241 ref NC_001491.2  | Equid herpesvirus 1, complete genome                    |
| deoxyribonuclease           | gi 9629732 ref NC_001844.1   | Equid herpesvirus 4, complete genome                    |
| deoxyribonuclease           | gi 9629818 ref NC_001847.1   | Bovine herpesvirus 1, complete genome                   |
| deoxyribonuclease           | gi 126882977 ref NC_002686.2 | Cercopithecine herpesvirus 9, complete genome           |
| deoxyribonuclease           | gi 123318702 ref NC_005261.2 | Bovine herpesvirus 5, complete genome                   |
| deoxyribonuclease           | gi 51557483 ref NC_006151.1  | Suid herpesvirus 1, complete genome                     |
| deoxyribonuclease           | gi 216905852 ref NC_011644.1 | Equid herpesvirus 9, complete genome                    |
| deoxyribonuclease           | gi 281190771 ref NC_013590.2 | Felid herpesvirus 1, complete genome                    |
| deoxyribonuclease           | gi 675510705 ref NC_024771.1 | Equid herpesvirus 3 strain AR/2007/C3A, complete genome |
| deoxyuridine triphosphatase | gi 50313241 ref NC_001491.2  | Equid herpesvirus 1, complete genome                    |
| deoxyuridine triphosphatase | gi 9629732 ref NC_001844.1   | Equid herpesvirus 4, complete genome                    |
| deoxyuridine triphosphatase | gi 9629818 ref NC_001847.1   | Bovine herpesvirus 1, complete genome                   |
| deoxyuridine triphosphatase | gi 123318702 ref NC_005261.2 | Bovine herpesvirus 5, complete genome                   |
| deoxyuridine triphosphatase | gi 51557483 ref NC_006151.1  | Suid herpesvirus 1, complete genome                     |
| deoxyuridine triphosphatase | gi 216905852 ref NC_011644.1 | Equid herpesvirus 9, complete genome                    |
| deoxyuridine triphosphatase | gi 281190771 ref NC_013590.2 | Felid herpesvirus 1, complete genome                    |
| deoxyuridine triphosphatase | gi 675510705 ref NC_024771.1 | Equid herpesvirus 3 strain AR/2007/C3A, complete genome |
| DNA packaging protein UL32  | gi 9625875 ref NC_001348.1   | Human herpesvirus 3, complete genome                    |
| DNA packaging protein UL32  | gi 50313241 ref NC_001491.2  | Equid herpesvirus 1, complete genome                    |

DNA packaging protein UL32 gi|9629732|ref|NC\_001844.1| Equid herpesvirus 4, complete genome  
DNA packaging protein UL32 gi|51557483|ref|NC\_006151.1| Suid herpesvirus 1, complete genome  
DNA packaging protein UL32 gi|216905852|ref|NC\_011644.1| Equid herpesvirus 9, complete genome  
DNA packaging protein UL32 gi|281190771|ref|NC\_013590.2| Felid herpesvirus 1, complete genome  
DNA packaging protein UL32 gi|386522723|ref|NC\_017826.1| Equid herpesvirus 8, complete genome  
DNA packaging protein UL33 gi|9629818|ref|NC\_001847.1| Bovine herpesvirus 1, complete genome  
DNA packaging protein UL33 gi|123318702|ref|NC\_005261.2| Bovine herpesvirus 5, complete genome  
DNA packaging protein UL33 gi|675510705|ref|NC\_024771.1| Equid herpesvirus 3 strain AR/2007/C3A, complete genome  
DNA packaging tegument protein UL17 gi|9625875|ref|NC\_001348.1| Human herpesvirus 3, complete genome  
DNA packaging tegument protein UL17 gi|50313241|ref|NC\_001491.2| Equid herpesvirus 1, complete genome  
DNA packaging tegument protein UL17 gi|9629732|ref|NC\_001844.1| Equid herpesvirus 4, complete genome  
DNA packaging tegument protein UL17 gi|9629818|ref|NC\_001847.1| Bovine herpesvirus 1, complete genome  
DNA packaging tegument protein UL17 gi|123318702|ref|NC\_005261.2| Bovine herpesvirus 5, complete genome  
DNA packaging tegument protein UL17 gi|51557483|ref|NC\_006151.1| Suid herpesvirus 1, complete genome  
DNA packaging tegument protein UL17 gi|216905852|ref|NC\_011644.1| Equid herpesvirus 9, complete genome  
DNA packaging tegument protein UL17 gi|281190771|ref|NC\_013590.2| Felid herpesvirus 1, complete genome  
DNA packaging tegument protein UL17 gi|675510705|ref|NC\_024771.1| Equid herpesvirus 3 strain AR/2007/C3A, complete genome  
DNA packaging tegument protein UL25 gi|9625875|ref|NC\_001348.1| Human herpesvirus 3, complete genome  
DNA packaging tegument protein UL25 gi|50313241|ref|NC\_001491.2| Equid herpesvirus 1, complete genome  
DNA packaging tegument protein UL25 gi|9629732|ref|NC\_001844.1| Equid herpesvirus 4, complete genome  
DNA packaging tegument protein UL25 gi|9629818|ref|NC\_001847.1| Bovine herpesvirus 1, complete genome  
DNA packaging tegument protein UL25 gi|126882977|ref|NC\_002686.2| Cercopithecine herpesvirus 9, complete genome  
DNA packaging tegument protein UL25 gi|123318702|ref|NC\_005261.2| Bovine herpesvirus 5, complete genome

|                                     |                              |                                                         |
|-------------------------------------|------------------------------|---------------------------------------------------------|
| DNA packaging tegument protein UL25 | gi 51557483 ref NC_006151.1  | Suid herpesvirus 1, complete genome                     |
| DNA packaging tegument protein UL25 | gi 216905852 ref NC_011644.1 | Equid herpesvirus 9, complete genome                    |
| DNA packaging tegument protein UL25 | gi 281190771 ref NC_013590.2 | Felid herpesvirus 1, complete genome                    |
| DNA packaging tegument protein UL25 | gi 675510705 ref NC_024771.1 | Equid herpesvirus 3 strain AR/2007/C3A, complete genome |
| DNA packaging terminase subunit 1   | gi 9625875 ref NC_001348.1   | Human herpesvirus 3, complete genome                    |
| DNA packaging terminase subunit 1   | gi 50313241 ref NC_001491.2  | Equid herpesvirus 1, complete genome                    |
| DNA packaging terminase subunit 1   | gi 9629732 ref NC_001844.1   | Equid herpesvirus 4, complete genome                    |
| DNA packaging terminase subunit 1   | gi 9629818 ref NC_001847.1   | Bovine herpesvirus 1, complete genome                   |
| DNA packaging terminase subunit 1   | gi 123318702 ref NC_005261.2 | Bovine herpesvirus 5, complete genome                   |
| DNA packaging terminase subunit 1   | gi 51557483 ref NC_006151.1  | Suid herpesvirus 1, complete genome                     |
| DNA packaging terminase subunit 1   | gi 216905852 ref NC_011644.1 | Equid herpesvirus 9, complete genome                    |
| DNA packaging terminase subunit 1   | gi 281190771 ref NC_013590.2 | Felid herpesvirus 1, complete genome                    |
| DNA packaging terminase subunit 1   | gi 675510705 ref NC_024771.1 | Equid herpesvirus 3 strain AR/2007/C3A, complete genome |
| DNA packaging terminase subunit 2   | gi 9625875 ref NC_001348.1   | Human herpesvirus 3, complete genome                    |
| DNA packaging terminase subunit 2   | gi 50313241 ref NC_001491.2  | Equid herpesvirus 1, complete genome                    |
| DNA packaging terminase subunit 2   | gi 9629732 ref NC_001844.1   | Equid herpesvirus 4, complete genome                    |
| DNA packaging terminase subunit 2   | gi 9629818 ref NC_001847.1   | Bovine herpesvirus 1, complete genome                   |
| DNA packaging terminase subunit 2   | gi 126882977 ref NC_002686.2 | Cercopithecine herpesvirus 9, complete genome           |
| DNA packaging terminase subunit 2   | gi 123318702 ref NC_005261.2 | Bovine herpesvirus 5, complete genome                   |
| DNA packaging terminase subunit 2   | gi 51557483 ref NC_006151.1  | Suid herpesvirus 1, complete genome                     |
| DNA packaging terminase subunit 2   | gi 216905852 ref NC_011644.1 | Equid herpesvirus 9, complete genome                    |
| DNA packaging terminase subunit 2   | gi 281190771 ref NC_013590.2 | Felid herpesvirus 1, complete genome                    |
| DNA packaging terminase subunit 2   | gi 386522723 ref NC_017826.1 | Equid herpesvirus 8, complete genome                    |

|                                                    |                                                                                       |
|----------------------------------------------------|---------------------------------------------------------------------------------------|
| DNA packaging terminase subunit 2                  | gi 675510705 ref NC_024771.1  Equid herpesvirus 3 strain AR/2007/C3A, complete genome |
| DNA packaging tsingle-stranded DNA-binding protein | gi 9625875 ref NC_001348.1  Human herpesvirus 3, complete genome                      |
| DNA packaging tsingle-stranded DNA-binding protein | gi 50313241 ref NC_001491.2  Equid herpesvirus 1, complete genome                     |
| DNA packaging tsingle-stranded DNA-binding protein | gi 9629732 ref NC_001844.1  Equid herpesvirus 4, complete genome                      |
| DNA packaging tsingle-stranded DNA-binding protein | gi 9629818 ref NC_001847.1  Bovine herpesvirus 1, complete genome                     |
| DNA packaging tsingle-stranded DNA-binding protein | gi 126882977 ref NC_002686.2  Cercopithecine herpesvirus 9, complete genome           |
| DNA packaging tsingle-stranded DNA-binding protein | gi 123318702 ref NC_005261.2  Bovine herpesvirus 5, complete genome                   |
| DNA packaging tsingle-stranded DNA-binding protein | gi 51557483 ref NC_006151.1  Suid herpesvirus 1, complete genome                      |
| DNA packaging tsingle-stranded DNA-binding protein | gi 216905852 ref NC_011644.1  Equid herpesvirus 9, complete genome                    |
| DNA packaging tsingle-stranded DNA-binding protein | gi 281190771 ref NC_013590.2  Felid herpesvirus 1, complete genome                    |
| DNA packaging tsingle-stranded DNA-binding protein | gi 675510705 ref NC_024771.1  Equid herpesvirus 3 strain AR/2007/C3A, complete genome |
| DNA polymerase catalytic subunit                   | gi 9625875 ref NC_001348.1  Human herpesvirus 3, complete genome                      |
| DNA polymerase catalytic subunit                   | gi 50313241 ref NC_001491.2  Equid herpesvirus 1, complete genome                     |
| DNA polymerase catalytic subunit                   | gi 9629732 ref NC_001844.1  Equid herpesvirus 4, complete genome                      |
| DNA polymerase catalytic subunit                   | gi 9629818 ref NC_001847.1  Bovine herpesvirus 1, complete genome                     |
| DNA polymerase catalytic subunit                   | gi 126882977 ref NC_002686.2  Cercopithecine herpesvirus 9, complete genome           |
| DNA polymerase catalytic subunit                   | gi 123318702 ref NC_005261.2  Bovine herpesvirus 5, complete genome                   |
| DNA polymerase catalytic subunit                   | gi 51557483 ref NC_006151.1  Suid herpesvirus 1, complete genome                      |
| DNA polymerase catalytic subunit                   | gi 216905852 ref NC_011644.1  Equid herpesvirus 9, complete genome                    |
| DNA polymerase catalytic subunit                   | gi 281190771 ref NC_013590.2  Felid herpesvirus 1, complete genome                    |
| DNA polymerase catalytic subunit                   | gi 386522723 ref NC_017826.1  Equid herpesvirus 8, complete genome                    |
| DNA polymerase catalytic subunit                   | gi 675510705 ref NC_024771.1  Equid herpesvirus 3 strain AR/2007/C3A, complete genome |

DNA polymerase processivity subunit gi|9625875|ref|NC\_001348.1| Human herpesvirus 3, complete genome  
DNA polymerase processivity subunit gi|50313241|ref|NC\_001491.2| Equid herpesvirus 1, complete genome  
DNA polymerase processivity subunit gi|9629732|ref|NC\_001844.1| Equid herpesvirus 4, complete genome  
DNA polymerase processivity subunit gi|9629818|ref|NC\_001847.1| Bovine herpesvirus 1, complete genome  
DNA polymerase processivity subunit gi|51557483|ref|NC\_006151.1| Suid herpesvirus 1, complete genome  
DNA polymerase processivity subunit gi|216905852|ref|NC\_011644.1| Equid herpesvirus 9, complete genome  
DNA polymerase processivity subunit gi|386522723|ref|NC\_017826.1| Equid herpesvirus 8, complete genome  
DNA polymerase processivity subunit gi|675510705|ref|NC\_024771.1| Equid herpesvirus 3 strain AR/2007/C3A, complete genome  
DNA replication origin-binding helicase gi|9625875|ref|NC\_001348.1| Human herpesvirus 3, complete genome  
DNA replication origin-binding helicase gi|50313241|ref|NC\_001491.2| Equid herpesvirus 1, complete genome  
DNA replication origin-binding helicase gi|9629732|ref|NC\_001844.1| Equid herpesvirus 4, complete genome  
DNA replication origin-binding helicase gi|9629818|ref|NC\_001847.1| Bovine herpesvirus 1, complete genome  
DNA replication origin-binding helicase gi|126882977|ref|NC\_002686.2| Cercopithecine herpesvirus 9, complete genome  
DNA replication origin-binding helicase gi|123318702|ref|NC\_005261.2| Bovine herpesvirus 5, complete genome  
DNA replication origin-binding helicase gi|51557483|ref|NC\_006151.1| Suid herpesvirus 1, complete genome  
DNA replication origin-binding helicase gi|216905852|ref|NC\_011644.1| Equid herpesvirus 9, complete genome  
DNA replication origin-binding helicase gi|281190771|ref|NC\_013590.2| Felid herpesvirus 1, complete genome  
DNA replication origin-binding helicase gi|675510705|ref|NC\_024771.1| Equid herpesvirus 3 strain AR/2007/C3A, complete genome  
envelope glycoprotein B gi|9625875|ref|NC\_001348.1| Human herpesvirus 3, complete genome  
envelope glycoprotein B gi|50313241|ref|NC\_001491.2| Equid herpesvirus 1, complete genome  
envelope glycoprotein B gi|9629732|ref|NC\_001844.1| Equid herpesvirus 4, complete genome  
envelope glycoprotein B gi|9629818|ref|NC\_001847.1| Bovine herpesvirus 1, complete genome  
envelope glycoprotein B gi|126882977|ref|NC\_002686.2| Cercopithecine herpesvirus 9, complete genome

envelope glycoprotein B gi|123318702|ref|NC\_005261.2| Bovine herpesvirus 5, complete genome  
envelope glycoprotein B gi|51557483|ref|NC\_006151.1| Suid herpesvirus 1, complete genome  
envelope glycoprotein B gi|216905852|ref|NC\_011644.1| Equid herpesvirus 9, complete genome  
envelope glycoprotein B gi|281190771|ref|NC\_013590.2| Felid herpesvirus 1, complete genome  
envelope glycoprotein B gi|386522723|ref|NC\_017826.1| Equid herpesvirus 8, complete genome  
envelope glycoprotein B gi|675510705|ref|NC\_024771.1| Equid herpesvirus 3 strain AR/2007/C3A, complete genome  
envelope glycoprotein C gi|9625875|ref|NC\_001348.1| Human herpesvirus 3, complete genome  
envelope glycoprotein C gi|50313241|ref|NC\_001491.2| Equid herpesvirus 1, complete genome  
envelope glycoprotein C gi|9629732|ref|NC\_001844.1| Equid herpesvirus 4, complete genome  
envelope glycoprotein C gi|9629818|ref|NC\_001847.1| Bovine herpesvirus 1, complete genome  
envelope glycoprotein C gi|126882977|ref|NC\_002686.2| Cercopithecine herpesvirus 9, complete genome  
envelope glycoprotein C gi|123318702|ref|NC\_005261.2| Bovine herpesvirus 5, complete genome  
envelope glycoprotein C gi|51557483|ref|NC\_006151.1| Suid herpesvirus 1, complete genome  
envelope glycoprotein C gi|216905852|ref|NC\_011644.1| Equid herpesvirus 9, complete genome  
envelope glycoprotein C gi|281190771|ref|NC\_013590.2| Felid herpesvirus 1, complete genome  
envelope glycoprotein C gi|675510705|ref|NC\_024771.1| Equid herpesvirus 3 strain AR/2007/C3A, complete genome  
envelope glycoprotein D gi|50313241|ref|NC\_001491.2| Equid herpesvirus 1, complete genome  
envelope glycoprotein D gi|9629732|ref|NC\_001844.1| Equid herpesvirus 4, complete genome  
envelope glycoprotein D gi|9629818|ref|NC\_001847.1| Bovine herpesvirus 1, complete genome  
envelope glycoprotein D gi|123318702|ref|NC\_005261.2| Bovine herpesvirus 5, complete genome  
envelope glycoprotein D gi|51557483|ref|NC\_006151.1| Suid herpesvirus 1, complete genome  
envelope glycoprotein D gi|216905852|ref|NC\_011644.1| Equid herpesvirus 9, complete genome  
envelope glycoprotein D gi|281190771|ref|NC\_013590.2| Felid herpesvirus 1, complete genome



envelope glycoprotein D gi|675510705|ref|NC\_024771.1| Equid herpesvirus 3 strain AR/2007/C3A, complete genome  
envelope glycoprotein E gi|9625875|ref|NC\_001348.1| Human herpesvirus 3, complete genome  
envelope glycoprotein E gi|50313241|ref|NC\_001491.2| Equid herpesvirus 1, complete genome  
envelope glycoprotein E gi|9629732|ref|NC\_001844.1| Equid herpesvirus 4, complete genome  
envelope glycoprotein E gi|9629818|ref|NC\_001847.1| Bovine herpesvirus 1, complete genome  
envelope glycoprotein E gi|126882977|ref|NC\_002686.2| Cercopithecine herpesvirus 9, complete genome  
envelope glycoprotein E gi|123318702|ref|NC\_005261.2| Bovine herpesvirus 5, complete genome  
envelope glycoprotein E gi|51557483|ref|NC\_006151.1| Suid herpesvirus 1, complete genome  
envelope glycoprotein E gi|216905852|ref|NC\_011644.1| Equid herpesvirus 9, complete genome  
envelope glycoprotein E gi|281190771|ref|NC\_013590.2| Felid herpesvirus 1, complete genome  
envelope glycoprotein E gi|386522723|ref|NC\_017826.1| Equid herpesvirus 8, complete genome  
envelope glycoprotein E gi|675510705|ref|NC\_024771.1| Equid herpesvirus 3 strain AR/2007/C3A, complete genome  
envelope glycoprotein G gi|50313241|ref|NC\_001491.2| Equid herpesvirus 1, complete genome  
envelope glycoprotein G gi|9629732|ref|NC\_001844.1| Equid herpesvirus 4, complete genome  
envelope glycoprotein G gi|9629818|ref|NC\_001847.1| Bovine herpesvirus 1, complete genome  
envelope glycoprotein G gi|123318702|ref|NC\_005261.2| Bovine herpesvirus 5, complete genome  
envelope glycoprotein G gi|51557483|ref|NC\_006151.1| Suid herpesvirus 1, complete genome  
envelope glycoprotein G gi|216905852|ref|NC\_011644.1| Equid herpesvirus 9, complete genome  
envelope glycoprotein G gi|281190771|ref|NC\_013590.2| Felid herpesvirus 1, complete genome  
envelope glycoprotein G gi|675510705|ref|NC\_024771.1| Equid herpesvirus 3 strain AR/2007/C3A, complete genome  
envelope glycoprotein H gi|9625875|ref|NC\_001348.1| Human herpesvirus 3, complete genome  
envelope glycoprotein H gi|50313241|ref|NC\_001491.2| Equid herpesvirus 1, complete genome  
envelope glycoprotein H gi|9629732|ref|NC\_001844.1| Equid herpesvirus 4, complete genome

envelope glycoprotein H gi|9629818|ref|NC\_001847.1| Bovine herpesvirus 1, complete genome  
envelope glycoprotein H gi|126882977|ref|NC\_002686.2| Cercopithecine herpesvirus 9, complete genome  
envelope glycoprotein H gi|123318702|ref|NC\_005261.2| Bovine herpesvirus 5, complete genome  
envelope glycoprotein H gi|51557483|ref|NC\_006151.1| Suid herpesvirus 1, complete genome  
envelope glycoprotein H gi|216905852|ref|NC\_011644.1| Equid herpesvirus 9, complete genome  
envelope glycoprotein H gi|281190771|ref|NC\_013590.2| Felid herpesvirus 1, complete genome  
envelope glycoprotein H gi|386522723|ref|NC\_017826.1| Equid herpesvirus 8, complete genome  
envelope glycoprotein H gi|675510705|ref|NC\_024771.1| Equid herpesvirus 3 strain AR/2007/C3A, complete genome  
envelope glycoprotein I gi|9625875|ref|NC\_001348.1| Human herpesvirus 3, complete genome  
envelope glycoprotein I gi|50313241|ref|NC\_001491.2| Equid herpesvirus 1, complete genome  
envelope glycoprotein I gi|9629732|ref|NC\_001844.1| Equid herpesvirus 4, complete genome  
envelope glycoprotein I gi|9629818|ref|NC\_001847.1| Bovine herpesvirus 1, complete genome  
envelope glycoprotein I gi|123318702|ref|NC\_005261.2| Bovine herpesvirus 5, complete genome  
envelope glycoprotein I gi|51557483|ref|NC\_006151.1| Suid herpesvirus 1, complete genome  
envelope glycoprotein I gi|216905852|ref|NC\_011644.1| Equid herpesvirus 9, complete genome  
envelope glycoprotein I gi|281190771|ref|NC\_013590.2| Felid herpesvirus 1, complete genome  
envelope glycoprotein I gi|675510705|ref|NC\_024771.1| Equid herpesvirus 3 strain AR/2007/C3A, complete genome  
envelope glycoprotein J gi|50313241|ref|NC\_001491.2| Equid herpesvirus 1, complete genome  
envelope glycoprotein J gi|9629732|ref|NC\_001844.1| Equid herpesvirus 4, complete genome  
envelope glycoprotein J gi|216905852|ref|NC\_011644.1| Equid herpesvirus 9, complete genome  
envelope glycoprotein J gi|386522723|ref|NC\_017826.1| Equid herpesvirus 8, complete genome  
envelope glycoprotein J gi|675510705|ref|NC\_024771.1| Equid herpesvirus 3 strain AR/2007/C3A, complete genome  
envelope glycoprotein K gi|9625875|ref|NC\_001348.1| Human herpesvirus 3, complete genome

envelope glycoprotein K gi|50313241|ref|NC\_001491.2| Equid herpesvirus 1, complete genome  
envelope glycoprotein K gi|9629732|ref|NC\_001844.1| Equid herpesvirus 4, complete genome  
envelope glycoprotein K gi|9629818|ref|NC\_001847.1| Bovine herpesvirus 1, complete genome  
envelope glycoprotein K gi|126882977|ref|NC\_002686.2| Cercopithecine herpesvirus 9, complete genome  
envelope glycoprotein K gi|123318702|ref|NC\_005261.2| Bovine herpesvirus 5, complete genome  
envelope glycoprotein K gi|51557483|ref|NC\_006151.1| Suid herpesvirus 1, complete genome  
envelope glycoprotein K gi|216905852|ref|NC\_011644.1| Equid herpesvirus 9, complete genome  
envelope glycoprotein K gi|281190771|ref|NC\_013590.2| Felid herpesvirus 1, complete genome  
envelope glycoprotein K gi|675510705|ref|NC\_024771.1| Equid herpesvirus 3 strain AR/2007/C3A, complete genome  
envelope glycoprotein L gi|9625875|ref|NC\_001348.1| Human herpesvirus 3, complete genome  
envelope glycoprotein L gi|9629818|ref|NC\_001847.1| Bovine herpesvirus 1, complete genome  
envelope glycoprotein L gi|123318702|ref|NC\_005261.2| Bovine herpesvirus 5, complete genome  
envelope glycoprotein L gi|51557483|ref|NC\_006151.1| Suid herpesvirus 1, complete genome  
envelope glycoprotein L gi|281190771|ref|NC\_013590.2| Felid herpesvirus 1, complete genome  
envelope glycoprotein L gi|675510705|ref|NC\_024771.1| Equid herpesvirus 3 strain AR/2007/C3A, complete genome  
envelope glycoprotein M gi|9625875|ref|NC\_001348.1| Human herpesvirus 3, complete genome  
envelope glycoprotein M gi|50313241|ref|NC\_001491.2| Equid herpesvirus 1, complete genome  
envelope glycoprotein M gi|9629732|ref|NC\_001844.1| Equid herpesvirus 4, complete genome  
envelope glycoprotein M gi|9629818|ref|NC\_001847.1| Bovine herpesvirus 1, complete genome  
envelope glycoprotein M gi|126882977|ref|NC\_002686.2| Cercopithecine herpesvirus 9, complete genome  
envelope glycoprotein M gi|123318702|ref|NC\_005261.2| Bovine herpesvirus 5, complete genome  
envelope glycoprotein M gi|51557483|ref|NC\_006151.1| Suid herpesvirus 1, complete genome  
envelope glycoprotein M gi|216905852|ref|NC\_011644.1| Equid herpesvirus 9, complete genome

envelope glycoprotein M gi|281190771|ref|NC\_013590.2| Felid herpesvirus 1, complete genome  
 envelope glycoprotein M gi|386522723|ref|NC\_017826.1| Equid herpesvirus 8, complete genome  
 envelope glycoprotein M gi|675510705|ref|NC\_024771.1| Equid herpesvirus 3 strain AR/2007/C3A, complete genome  
 envelope glycoprotein N gi|50313241|ref|NC\_001491.2| Equid herpesvirus 1, complete genome  
 envelope glycoprotein N gi|9629732|ref|NC\_001844.1| Equid herpesvirus 4, complete genome  
 envelope glycoprotein N gi|9629818|ref|NC\_001847.1| Bovine herpesvirus 1, complete genome  
 envelope glycoprotein N gi|123318702|ref|NC\_005261.2| Bovine herpesvirus 5, complete genome  
 envelope glycoprotein N gi|51557483|ref|NC\_006151.1| Suid herpesvirus 1, complete genome  
 envelope glycoprotein N gi|216905852|ref|NC\_011644.1| Equid herpesvirus 9, complete genome  
 envelope glycoprotein N gi|675510705|ref|NC\_024771.1| Equid herpesvirus 3 strain AR/2007/C3A, complete genome  
 envelope protein UL20 gi|9625875|ref|NC\_001348.1| Human herpesvirus 3, complete genome  
 envelope protein UL20 gi|50313241|ref|NC\_001491.2| Equid herpesvirus 1, complete genome  
 envelope protein UL20 gi|9629818|ref|NC\_001847.1| Bovine herpesvirus 1, complete genome  
 envelope protein UL20 gi|123318702|ref|NC\_005261.2| Bovine herpesvirus 5, complete genome  
 envelope protein UL20 gi|51557483|ref|NC\_006151.1| Suid herpesvirus 1, complete genome  
 envelope protein UL20 gi|675510705|ref|NC\_024771.1| Equid herpesvirus 3 strain AR/2007/C3A, complete genome  
 envelope protein UL43 gi|9625875|ref|NC\_001348.1| Human herpesvirus 3, complete genome  
 envelope protein UL43 gi|50313241|ref|NC\_001491.2| Equid herpesvirus 1, complete genome  
 envelope protein UL43 gi|9629732|ref|NC\_001844.1| Equid herpesvirus 4, complete genome  
 envelope protein UL43 gi|9629818|ref|NC\_001847.1| Bovine herpesvirus 1, complete genome  
 envelope protein UL43 gi|126882977|ref|NC\_002686.2| Cercopithecine herpesvirus 9, complete genome  
 envelope protein UL43 gi|123318702|ref|NC\_005261.2| Bovine herpesvirus 5, complete genome  
 envelope protein UL43 gi|51557483|ref|NC\_006151.1| Suid herpesvirus 1, complete genome

|                                   |                              |                                                         |
|-----------------------------------|------------------------------|---------------------------------------------------------|
| envelope protein UL43             | gi 216905852 ref NC_011644.1 | Equid herpesvirus 9, complete genome                    |
| envelope protein UL43             | gi 281190771 ref NC_013590.2 | Felid herpesvirus 1, complete genome                    |
| envelope protein UL43             | gi 675510705 ref NC_024771.1 | Equid herpesvirus 3 strain AR/2007/C3A, complete genome |
| helicase-primase helicase subunit | gi 9625875 ref NC_001348.1   | Human herpesvirus 3, complete genome                    |
| helicase-primase helicase subunit | gi 50313241 ref NC_001491.2  | Equid herpesvirus 1, complete genome                    |
| helicase-primase helicase subunit | gi 9629732 ref NC_001844.1   | Equid herpesvirus 4, complete genome                    |
| helicase-primase helicase subunit | gi 9629818 ref NC_001847.1   | Bovine herpesvirus 1, complete genome                   |
| helicase-primase helicase subunit | gi 123318702 ref NC_005261.2 | Bovine herpesvirus 5, complete genome                   |
| helicase-primase helicase subunit | gi 51557483 ref NC_006151.1  | Suid herpesvirus 1, complete genome                     |
| helicase-primase helicase subunit | gi 216905852 ref NC_011644.1 | Equid herpesvirus 9, complete genome                    |
| helicase-primase helicase subunit | gi 281190771 ref NC_013590.2 | Felid herpesvirus 1, complete genome                    |
| helicase-primase helicase subunit | gi 675510705 ref NC_024771.1 | Equid herpesvirus 3 strain AR/2007/C3A, complete genome |
| helicase-primase primase subunit  | gi 9625875 ref NC_001348.1   | Human herpesvirus 3, complete genome                    |
| helicase-primase primase subunit  | gi 50313241 ref NC_001491.2  | Equid herpesvirus 1, complete genome                    |
| helicase-primase primase subunit  | gi 9629732 ref NC_001844.1   | Equid herpesvirus 4, complete genome                    |
| helicase-primase primase subunit  | gi 9629818 ref NC_001847.1   | Bovine herpesvirus 1, complete genome                   |
| helicase-primase primase subunit  | gi 126882977 ref NC_002686.2 | Cercopithecine herpesvirus 9, complete genome           |
| helicase-primase primase subunit  | gi 123318702 ref NC_005261.2 | Bovine herpesvirus 5, complete genome                   |
| helicase-primase primase subunit  | gi 51557483 ref NC_006151.1  | Suid herpesvirus 1, complete genome                     |
| helicase-primase primase subunit  | gi 216905852 ref NC_011644.1 | Equid herpesvirus 9, complete genome                    |
| helicase-primase primase subunit  | gi 281190771 ref NC_013590.2 | Felid herpesvirus 1, complete genome                    |
| helicase-primase primase subunit  | gi 386522723 ref NC_017826.1 | Equid herpesvirus 8, complete genome                    |
| helicase-primase primase subunit  | gi 675510705 ref NC_024771.1 | Equid herpesvirus 3 strain AR/2007/C3A, complete genome |

|                          |                                                                                       |
|--------------------------|---------------------------------------------------------------------------------------|
| helicase-primase subunit | gi 9625875 ref NC_001348.1  Human herpesvirus 3, complete genome                      |
| helicase-primase subunit | gi 50313241 ref NC_001491.2  Equid herpesvirus 1, complete genome                     |
| helicase-primase subunit | gi 9629732 ref NC_001844.1  Equid herpesvirus 4, complete genome                      |
| helicase-primase subunit | gi 9629818 ref NC_001847.1  Bovine herpesvirus 1, complete genome                     |
| helicase-primase subunit | gi 126882977 ref NC_002686.2  Cercopithecine herpesvirus 9, complete genome           |
| helicase-primase subunit | gi 123318702 ref NC_005261.2  Bovine herpesvirus 5, complete genome                   |
| helicase-primase subunit | gi 51557483 ref NC_006151.1  Suid herpesvirus 1, complete genome                      |
| helicase-primase subunit | gi 216905852 ref NC_011644.1  Equid herpesvirus 9, complete genome                    |
| helicase-primase subunit | gi 281190771 ref NC_013590.2  Felid herpesvirus 1, complete genome                    |
| helicase-primase subunit | gi 386522723 ref NC_017826.1  Equid herpesvirus 8, complete genome                    |
| helicase-primase subunit | gi 675510705 ref NC_024771.1  Equid herpesvirus 3 strain AR/2007/C3A, complete genome |
| hypothetical protein     | gi 386522723 ref NC_017826.1  Equid herpesvirus 8, complete genome                    |
| large latency transcript | gi 51557483 ref NC_006151.1  Suid herpesvirus 1, complete genome                      |
| large tegument protein   | gi 9625875 ref NC_001348.1  Human herpesvirus 3, complete genome                      |
| large tegument protein   | gi 50313241 ref NC_001491.2  Equid herpesvirus 1, complete genome                     |
| large tegument protein   | gi 9629732 ref NC_001844.1  Equid herpesvirus 4, complete genome                      |
| large tegument protein   | gi 9629818 ref NC_001847.1  Bovine herpesvirus 1, complete genome                     |
| large tegument protein   | gi 126882977 ref NC_002686.2  Cercopithecine herpesvirus 9, complete genome           |
| large tegument protein   | gi 123318702 ref NC_005261.2  Bovine herpesvirus 5, complete genome                   |
| large tegument protein   | gi 51557483 ref NC_006151.1  Suid herpesvirus 1, complete genome                      |
| large tegument protein   | gi 216905852 ref NC_011644.1  Equid herpesvirus 9, complete genome                    |
| large tegument protein   | gi 281190771 ref NC_013590.2  Felid herpesvirus 1, complete genome                    |
| large tegument protein   | gi 675510705 ref NC_024771.1  Equid herpesvirus 3 strain AR/2007/C3A, complete genome |

|                        |                                                                                       |
|------------------------|---------------------------------------------------------------------------------------|
| major capsid protein   | gi 9625875 ref NC_001348.1  Human herpesvirus 3, complete genome                      |
| major capsid protein   | gi 50313241 ref NC_001491.2  Equid herpesvirus 1, complete genome                     |
| major capsid protein   | gi 9629732 ref NC_001844.1  Equid herpesvirus 4, complete genome                      |
| major capsid protein   | gi 9629818 ref NC_001847.1  Bovine herpesvirus 1, complete genome                     |
| major capsid protein   | gi 126882977 ref NC_002686.2  Cercopithecine herpesvirus 9, complete genome           |
| major capsid protein   | gi 123318702 ref NC_005261.2  Bovine herpesvirus 5, complete genome                   |
| major capsid protein   | gi 51557483 ref NC_006151.1  Suid herpesvirus 1, complete genome                      |
| major capsid protein   | gi 216905852 ref NC_011644.1  Equid herpesvirus 9, complete genome                    |
| major capsid protein   | gi 281190771 ref NC_013590.2  Felid herpesvirus 1, complete genome                    |
| major capsid protein   | gi 675510705 ref NC_024771.1  Equid herpesvirus 3 strain AR/2007/C3A, complete genome |
| membrane protein UL45  | gi 9629732 ref NC_001844.1  Equid herpesvirus 4, complete genome                      |
| membrane protein UL45  | gi 216905852 ref NC_011644.1  Equid herpesvirus 9, complete genome                    |
| membrane protein UL45  | gi 281190771 ref NC_013590.2  Felid herpesvirus 1, complete genome                    |
| membrane protein UL45  | gi 386522723 ref NC_017826.1  Equid herpesvirus 8, complete genome                    |
| membrane protein UL45  | gi 675510705 ref NC_024771.1  Equid herpesvirus 3 strain AR/2007/C3A, complete genome |
| membrane protein UL56  | gi 9625875 ref NC_001348.1  Human herpesvirus 3, complete genome                      |
| membrane protein UL56  | gi 50313241 ref NC_001491.2  Equid herpesvirus 1, complete genome                     |
| membrane protein UL56  | gi 51557483 ref NC_006151.1  Suid herpesvirus 1, complete genome                      |
| membrane protein UL56  | gi 216905852 ref NC_011644.1  Equid herpesvirus 9, complete genome                    |
| membrane protein UL56  | gi 386522723 ref NC_017826.1  Equid herpesvirus 8, complete genome                    |
| membrane protein UL56  | gi 675510705 ref NC_024771.1  Equid herpesvirus 3 strain AR/2007/C3A, complete genome |
| membrane protein UL56A | gi 126882977 ref NC_002686.2  Cercopithecine herpesvirus 9, complete genome           |
| membrane protein US8A  | gi 50313241 ref NC_001491.2  Equid herpesvirus 1, complete genome                     |

|                                      |                                                                                       |
|--------------------------------------|---------------------------------------------------------------------------------------|
| membrane protein US8A                | gi 9629732 ref NC_001844.1  Equid herpesvirus 4, complete genome                      |
| membrane protein US8A                | gi 216905852 ref NC_011644.1  Equid herpesvirus 9, complete genome                    |
| membrane protein US9                 | gi 9625875 ref NC_001348.1  Human herpesvirus 3, complete genome                      |
| membrane protein US9                 | gi 50313241 ref NC_001491.2  Equid herpesvirus 1, complete genome                     |
| membrane protein US9                 | gi 9629732 ref NC_001844.1  Equid herpesvirus 4, complete genome                      |
| membrane protein US9                 | gi 9629818 ref NC_001847.1  Bovine herpesvirus 1, complete genome                     |
| membrane protein US9                 | gi 123318702 ref NC_005261.2  Bovine herpesvirus 5, complete genome                   |
| membrane protein US9                 | gi 51557483 ref NC_006151.1  Suid herpesvirus 1, complete genome                      |
| membrane protein US9                 | gi 216905852 ref NC_011644.1  Equid herpesvirus 9, complete genome                    |
| membrane protein US9                 | gi 281190771 ref NC_013590.2  Felid herpesvirus 1, complete genome                    |
| membrane protein US9                 | gi 675510705 ref NC_024771.1  Equid herpesvirus 3 strain AR/2007/C3A, complete genome |
| membrane protein V1                  | gi 9625875 ref NC_001348.1  Human herpesvirus 3, complete genome                      |
| membrane protein V1                  | gi 50313241 ref NC_001491.2  Equid herpesvirus 1, complete genome                     |
| membrane protein V1                  | gi 216905852 ref NC_011644.1  Equid herpesvirus 9, complete genome                    |
| membrane protein V1                  | gi 386522723 ref NC_017826.1  Equid herpesvirus 8, complete genome                    |
| membrane protein V1                  | gi 675510705 ref NC_024771.1  Equid herpesvirus 3 strain AR/2007/C3A, complete genome |
| multifunctional expression regulator | gi 9625875 ref NC_001348.1  Human herpesvirus 3, complete genome                      |
| multifunctional expression regulator | gi 50313241 ref NC_001491.2  Equid herpesvirus 1, complete genome                     |
| multifunctional expression regulator | gi 9629732 ref NC_001844.1  Equid herpesvirus 4, complete genome                      |
| multifunctional expression regulator | gi 9629818 ref NC_001847.1  Bovine herpesvirus 1, complete genome                     |
| multifunctional expression regulator | gi 123318702 ref NC_005261.2  Bovine herpesvirus 5, complete genome                   |
| multifunctional expression regulator | gi 51557483 ref NC_006151.1  Suid herpesvirus 1, complete genome                      |
| multifunctional expression regulator | gi 216905852 ref NC_011644.1  Equid herpesvirus 9, complete genome                    |



|                                                      |                              |                                                         |
|------------------------------------------------------|------------------------------|---------------------------------------------------------|
| multifunctional expression regulator                 | gi 281190771 ref NC_013590.2 | Felid herpesvirus 1, complete genome                    |
| multifunctional expression regulator                 | gi 386522723 ref NC_017826.1 | Equid herpesvirus 8, complete genome                    |
| multifunctional expression regulator                 | gi 675510705 ref NC_024771.1 | Equid herpesvirus 3 strain AR/2007/C3A, complete genome |
| multifunctional expression regulator-related protein | gi 126882977 ref NC_002686.2 | Cercopithecine herpesvirus 9, complete genome           |
| myristylated tegument protein                        | gi 9625875 ref NC_001348.1   | Human herpesvirus 3, complete genome                    |
| myristylated tegument protein                        | gi 50313241 ref NC_001491.2  | Equid herpesvirus 1, complete genome                    |
| myristylated tegument protein                        | gi 9629732 ref NC_001844.1   | Equid herpesvirus 4, complete genome                    |
| myristylated tegument protein                        | gi 9629818 ref NC_001847.1   | Bovine herpesvirus 1, complete genome                   |
| myristylated tegument protein                        | gi 126882977 ref NC_002686.2 | Cercopithecine herpesvirus 9, complete genome           |
| myristylated tegument protein                        | gi 123318702 ref NC_005261.2 | Bovine herpesvirus 5, complete genome                   |
| myristylated tegument protein                        | gi 51557483 ref NC_006151.1  | Suid herpesvirus 1, complete genome                     |
| myristylated tegument protein                        | gi 216905852 ref NC_011644.1 | Equid herpesvirus 9, complete genome                    |
| myristylated tegument protein                        | gi 675510705 ref NC_024771.1 | Equid herpesvirus 3 strain AR/2007/C3A, complete genome |
| myristylated tegument protein CIRC                   | gi 9625875 ref NC_001348.1   | Human herpesvirus 3, complete genome                    |
| myristylated tegument protein CIRC                   | gi 50313241 ref NC_001491.2  | Equid herpesvirus 1, complete genome                    |
| myristylated tegument protein CIRC                   | gi 9629732 ref NC_001844.1   | Equid herpesvirus 4, complete genome                    |
| myristylated tegument protein CIRC                   | gi 9629818 ref NC_001847.1   | Bovine herpesvirus 1, complete genome                   |
| myristylated tegument protein CIRC                   | gi 123318702 ref NC_005261.2 | Bovine herpesvirus 5, complete genome                   |
| myristylated tegument protein CIRC                   | gi 216905852 ref NC_011644.1 | Equid herpesvirus 9, complete genome                    |
| myristylated tegument protein CIRC                   | gi 386522723 ref NC_017826.1 | Equid herpesvirus 8, complete genome                    |
| myristylated tegument protein CIRC                   | gi 675510705 ref NC_024771.1 | Equid herpesvirus 3 strain AR/2007/C3A, complete genome |
| nuclear egress lamina protein                        | gi 9625875 ref NC_001348.1   | Human herpesvirus 3, complete genome                    |
| nuclear egress lamina protein                        | gi 50313241 ref NC_001491.2  | Equid herpesvirus 1, complete genome                    |

|                                 |                              |                                                         |
|---------------------------------|------------------------------|---------------------------------------------------------|
| nuclear egress lamina protein   | gi 9629818 ref NC_001847.1   | Bovine herpesvirus 1, complete genome                   |
| nuclear egress lamina protein   | gi 123318702 ref NC_005261.2 | Bovine herpesvirus 5, complete genome                   |
| nuclear egress lamina protein   | gi 51557483 ref NC_006151.1  | Suid herpesvirus 1, complete genome                     |
| nuclear egress lamina protein   | gi 216905852 ref NC_011644.1 | Equid herpesvirus 9, complete genome                    |
| nuclear egress lamina protein   | gi 675510705 ref NC_024771.1 | Equid herpesvirus 3 strain AR/2007/C3A, complete genome |
| nuclear egress membrane protein | gi 9625875 ref NC_001348.1   | Human herpesvirus 3, complete genome                    |
| nuclear egress membrane protein | gi 50313241 ref NC_001491.2  | Equid herpesvirus 1, complete genome                    |
| nuclear egress membrane protein | gi 9629732 ref NC_001844.1   | Equid herpesvirus 4, complete genome                    |
| nuclear egress membrane protein | gi 9629818 ref NC_001847.1   | Bovine herpesvirus 1, complete genome                   |
| nuclear egress membrane protein | gi 126882977 ref NC_002686.2 | Cercopithecine herpesvirus 9, complete genome           |
| nuclear egress membrane protein | gi 123318702 ref NC_005261.2 | Bovine herpesvirus 5, complete genome                   |
| nuclear egress membrane protein | gi 51557483 ref NC_006151.1  | Suid herpesvirus 1, complete genome                     |
| nuclear egress membrane protein | gi 216905852 ref NC_011644.1 | Equid herpesvirus 9, complete genome                    |
| nuclear egress membrane protein | gi 281190771 ref NC_013590.2 | Felid herpesvirus 1, complete genome                    |
| nuclear egress membrane protein | gi 675510705 ref NC_024771.1 | Equid herpesvirus 3 strain AR/2007/C3A, complete genome |
| nuclear protein UL24            | gi 50313241 ref NC_001491.2  | Equid herpesvirus 1, complete genome                    |
| nuclear protein UL24            | gi 9629732 ref NC_001844.1   | Equid herpesvirus 4, complete genome                    |
| nuclear protein UL24            | gi 9629818 ref NC_001847.1   | Bovine herpesvirus 1, complete genome                   |
| nuclear protein UL24            | gi 126882977 ref NC_002686.2 | Cercopithecine herpesvirus 9, complete genome           |
| nuclear protein UL24            | gi 123318702 ref NC_005261.2 | Bovine herpesvirus 5, complete genome                   |
| nuclear protein UL24            | gi 51557483 ref NC_006151.1  | Suid herpesvirus 1, complete genome                     |
| nuclear protein UL24            | gi 216905852 ref NC_011644.1 | Equid herpesvirus 9, complete genome                    |
| nuclear protein UL24            | gi 281190771 ref NC_013590.2 | Felid herpesvirus 1, complete genome                    |

nuclear protein UL24 gi|675510705|ref|NC\_024771.1| Equid herpesvirus 3 strain AR/2007/C3A, complete genome  
nuclear protein UL3 gi|9625875|ref|NC\_001348.1| Human herpesvirus 3, complete genome  
nuclear protein UL3 gi|50313241|ref|NC\_001491.2| Equid herpesvirus 1, complete genome  
nuclear protein UL3 gi|9629732|ref|NC\_001844.1| Equid herpesvirus 4, complete genome  
nuclear protein UL3 gi|9629818|ref|NC\_001847.1| Bovine herpesvirus 1, complete genome  
nuclear protein UL3 gi|123318702|ref|NC\_005261.2| Bovine herpesvirus 5, complete genome  
nuclear protein UL3 gi|51557483|ref|NC\_006151.1| Suid herpesvirus 1, complete genome  
nuclear protein UL3 gi|216905852|ref|NC\_011644.1| Equid herpesvirus 9, complete genome  
nuclear protein UL3 gi|281190771|ref|NC\_013590.2| Felid herpesvirus 1, complete genome  
nuclear protein UL3 gi|675510705|ref|NC\_024771.1| Equid herpesvirus 3 strain AR/2007/C3A, complete genome  
nuclear protein UL4 gi|9625875|ref|NC\_001348.1| Human herpesvirus 3, complete genome  
nuclear protein UL4 gi|50313241|ref|NC\_001491.2| Equid herpesvirus 1, complete genome  
nuclear protein UL4 gi|9629732|ref|NC\_001844.1| Equid herpesvirus 4, complete genome  
nuclear protein UL4 gi|9629818|ref|NC\_001847.1| Bovine herpesvirus 1, complete genome  
nuclear protein UL4 gi|123318702|ref|NC\_005261.2| Bovine herpesvirus 5, complete genome  
nuclear protein UL4 gi|51557483|ref|NC\_006151.1| Suid herpesvirus 1, complete genome  
nuclear protein UL4 gi|216905852|ref|NC\_011644.1| Equid herpesvirus 9, complete genome  
nuclear protein UL4 gi|281190771|ref|NC\_013590.2| Felid herpesvirus 1, complete genome  
nuclear protein UL4 gi|386522723|ref|NC\_017826.1| Equid herpesvirus 8, complete genome  
nuclear protein UL4 gi|675510705|ref|NC\_024771.1| Equid herpesvirus 3 strain AR/2007/C3A, complete genome  
nuclear protein UL55 gi|9625875|ref|NC\_001348.1| Human herpesvirus 3, complete genome  
nuclear protein UL55 gi|50313241|ref|NC\_001491.2| Equid herpesvirus 1, complete genome  
nuclear protein UL55 gi|9629732|ref|NC\_001844.1| Equid herpesvirus 4, complete genome

nuclear protein UL55 gi|126882977|ref|NC\_002686.2| Cercopithecine herpesvirus 9, complete genome  
nuclear protein UL55 gi|386522723|ref|NC\_017826.1| Equid herpesvirus 8, complete genome  
nuclear protein UL55 gi|675510705|ref|NC\_024771.1| Equid herpesvirus 3 strain AR/2007/C3A, complete genome  
protein V32 gi|9625875|ref|NC\_001348.1| Human herpesvirus 3, complete genome  
protein V32 gi|50313241|ref|NC\_001491.2| Equid herpesvirus 1, complete genome  
protein V32 gi|9629732|ref|NC\_001844.1| Equid herpesvirus 4, complete genome  
protein V32 gi|216905852|ref|NC\_011644.1| Equid herpesvirus 9, complete genome  
protein V32 gi|675510705|ref|NC\_024771.1| Equid herpesvirus 3 strain AR/2007/C3A, complete genome  
protein V57 gi|50313241|ref|NC\_001491.2| Equid herpesvirus 1, complete genome  
protein V57 gi|9629818|ref|NC\_001847.1| Bovine herpesvirus 1, complete genome  
protein V57 gi|123318702|ref|NC\_005261.2| Bovine herpesvirus 5, complete genome  
protein V57 gi|51557483|ref|NC\_006151.1| Suid herpesvirus 1, complete genome  
protein V57 gi|216905852|ref|NC\_011644.1| Equid herpesvirus 9, complete genome  
protein V57 gi|281190771|ref|NC\_013590.2| Felid herpesvirus 1, complete genome  
protein V57 gi|675510705|ref|NC\_024771.1| Equid herpesvirus 3 strain AR/2007/C3A, complete genome  
putative membrane protein US8A gi|675510705|ref|NC\_024771.1| Equid herpesvirus 3 strain AR/2007/C3A, complete genome  
regulatory protein ICP22 gi|9625875|ref|NC\_001348.1| Human herpesvirus 3, complete genome  
regulatory protein ICP22 gi|50313241|ref|NC\_001491.2| Equid herpesvirus 1, complete genome  
regulatory protein ICP22 gi|9629732|ref|NC\_001844.1| Equid herpesvirus 4, complete genome  
regulatory protein ICP22 gi|9629818|ref|NC\_001847.1| Bovine herpesvirus 1, complete genome  
regulatory protein ICP22 gi|126882977|ref|NC\_002686.2| Cercopithecine herpesvirus 9, complete genome  
regulatory protein ICP22 gi|123318702|ref|NC\_005261.2| Bovine herpesvirus 5, complete genome  
regulatory protein ICP22 gi|51557483|ref|NC\_006151.1| Suid herpesvirus 1, complete genome

|                                    |                              |                                                         |
|------------------------------------|------------------------------|---------------------------------------------------------|
| regulatory protein ICP22           | gi 216905852 ref NC_011644.1 | Equid herpesvirus 9, complete genome                    |
| regulatory protein ICP22           | gi 281190771 ref NC_013590.2 | Felid herpesvirus 1, complete genome                    |
| regulatory protein ICP22           | gi 386522723 ref NC_017826.1 | Equid herpesvirus 8, complete genome                    |
| regulatory protein ICP22           | gi 675510705 ref NC_024771.1 | Equid herpesvirus 3 strain AR/2007/C3A, complete genome |
| ribonucleotide reductase subunit 1 | gi 9625875 ref NC_001348.1   | Human herpesvirus 3, complete genome                    |
| ribonucleotide reductase subunit 1 | gi 50313241 ref NC_001491.2  | Equid herpesvirus 1, complete genome                    |
| ribonucleotide reductase subunit 1 | gi 9629732 ref NC_001844.1   | Equid herpesvirus 4, complete genome                    |
| ribonucleotide reductase subunit 1 | gi 9629818 ref NC_001847.1   | Bovine herpesvirus 1, complete genome                   |
| ribonucleotide reductase subunit 1 | gi 123318702 ref NC_005261.2 | Bovine herpesvirus 5, complete genome                   |
| ribonucleotide reductase subunit 1 | gi 51557483 ref NC_006151.1  | Suid herpesvirus 1, complete genome                     |
| ribonucleotide reductase subunit 1 | gi 216905852 ref NC_011644.1 | Equid herpesvirus 9, complete genome                    |
| ribonucleotide reductase subunit 1 | gi 281190771 ref NC_013590.2 | Felid herpesvirus 1, complete genome                    |
| ribonucleotide reductase subunit 1 | gi 675510705 ref NC_024771.1 | Equid herpesvirus 3 strain AR/2007/C3A, complete genome |
| ribonucleotide reductase subunit 2 | gi 9625875 ref NC_001348.1   | Human herpesvirus 3, complete genome                    |
| ribonucleotide reductase subunit 2 | gi 50313241 ref NC_001491.2  | Equid herpesvirus 1, complete genome                    |
| ribonucleotide reductase subunit 2 | gi 9629732 ref NC_001844.1   | Equid herpesvirus 4, complete genome                    |
| ribonucleotide reductase subunit 2 | gi 9629818 ref NC_001847.1   | Bovine herpesvirus 1, complete genome                   |
| ribonucleotide reductase subunit 2 | gi 126882977 ref NC_002686.2 | Cercopithecine herpesvirus 9, complete genome           |
| ribonucleotide reductase subunit 2 | gi 123318702 ref NC_005261.2 | Bovine herpesvirus 5, complete genome                   |
| ribonucleotide reductase subunit 2 | gi 51557483 ref NC_006151.1  | Suid herpesvirus 1, complete genome                     |
| ribonucleotide reductase subunit 2 | gi 216905852 ref NC_011644.1 | Equid herpesvirus 9, complete genome                    |
| ribonucleotide reductase subunit 2 | gi 281190771 ref NC_013590.2 | Felid herpesvirus 1, complete genome                    |
| ribonucleotide reductase subunit 2 | gi 675510705 ref NC_024771.1 | Equid herpesvirus 3 strain AR/2007/C3A, complete genome |

serine/threonine protein kinase US3 gi|9625875|ref|NC\_001348.1| Human herpesvirus 3, complete genome  
 serine/threonine protein kinase US3 gi|50313241|ref|NC\_001491.2| Equid herpesvirus 1, complete genome  
 serine/threonine protein kinase US3 gi|9629732|ref|NC\_001844.1| Equid herpesvirus 4, complete genome  
 serine/threonine protein kinase US3 gi|9629818|ref|NC\_001847.1| Bovine herpesvirus 1, complete genome  
 serine/threonine protein kinase US3 gi|126882977|ref|NC\_002686.2| Cercopithecine herpesvirus 9, complete genome  
 serine/threonine protein kinase US3 gi|123318702|ref|NC\_005261.2| Bovine herpesvirus 5, complete genome  
 serine/threonine protein kinase US3 gi|51557483|ref|NC\_006151.1| Suid herpesvirus 1, complete genome  
 serine/threonine protein kinase US3 gi|216905852|ref|NC\_011644.1| Equid herpesvirus 9, complete genome  
 serine/threonine protein kinase US3 gi|281190771|ref|NC\_013590.2| Felid herpesvirus 1, complete genome  
 serine/threonine protein kinase US3 gi|675510705|ref|NC\_024771.1| Equid herpesvirus 3 strain AR/2007/C3A, complete genome  
 small capsid protein gi|9625875|ref|NC\_001348.1| Human herpesvirus 3, complete genome  
 small capsid protein gi|9629818|ref|NC\_001847.1| Bovine herpesvirus 1, complete genome  
 small capsid protein gi|123318702|ref|NC\_005261.2| Bovine herpesvirus 5, complete genome  
 small capsid protein gi|51557483|ref|NC\_006151.1| Suid herpesvirus 1, complete genome  
 small capsid protein gi|675510705|ref|NC\_024771.1| Equid herpesvirus 3 strain AR/2007/C3A, complete genome  
 tegument host shutoff protein gi|9625875|ref|NC\_001348.1| Human herpesvirus 3, complete genome  
 tegument host shutoff protein gi|50313241|ref|NC\_001491.2| Equid herpesvirus 1, complete genome  
 tegument host shutoff protein gi|9629732|ref|NC\_001844.1| Equid herpesvirus 4, complete genome  
 tegument host shutoff protein gi|9629818|ref|NC\_001847.1| Bovine herpesvirus 1, complete genome  
 tegument host shutoff protein gi|123318702|ref|NC\_005261.2| Bovine herpesvirus 5, complete genome  
 tegument host shutoff protein gi|51557483|ref|NC\_006151.1| Suid herpesvirus 1, complete genome  
 tegument host shutoff protein gi|216905852|ref|NC\_011644.1| Equid herpesvirus 9, complete genome  
 tegument host shutoff protein gi|281190771|ref|NC\_013590.2| Felid herpesvirus 1, complete genome

|                                |                              |                                                         |
|--------------------------------|------------------------------|---------------------------------------------------------|
| tegument host shut-off protein | gi 675510705 ref NC_024771.1 | Equid herpesvirus 3 strain AR/2007/C3A, complete genome |
| tegument protein UL14          | gi 9625875 ref NC_001348.1   | Human herpesvirus 3, complete genome                    |
| tegument protein UL14          | gi 50313241 ref NC_001491.2  | Equid herpesvirus 1, complete genome                    |
| tegument protein UL14          | gi 9629732 ref NC_001844.1   | Equid herpesvirus 4, complete genome                    |
| tegument protein UL14          | gi 9629818 ref NC_001847.1   | Bovine herpesvirus 1, complete genome                   |
| tegument protein UL14          | gi 126882977 ref NC_002686.2 | Cercopithecine herpesvirus 9, complete genome           |
| tegument protein UL14          | gi 123318702 ref NC_005261.2 | Bovine herpesvirus 5, complete genome                   |
| tegument protein UL14          | gi 51557483 ref NC_006151.1  | Suid herpesvirus 1, complete genome                     |
| tegument protein UL14          | gi 216905852 ref NC_011644.1 | Equid herpesvirus 9, complete genome                    |
| tegument protein UL14          | gi 281190771 ref NC_013590.2 | Felid herpesvirus 1, complete genome                    |
| tegument protein UL14          | gi 386522723 ref NC_017826.1 | Equid herpesvirus 8, complete genome                    |
| tegument protein UL14          | gi 675510705 ref NC_024771.1 | Equid herpesvirus 3 strain AR/2007/C3A, complete genome |
| tegument protein UL16          | gi 9625875 ref NC_001348.1   | Human herpesvirus 3, complete genome                    |
| tegument protein UL16          | gi 50313241 ref NC_001491.2  | Equid herpesvirus 1, complete genome                    |
| tegument protein UL16          | gi 9629732 ref NC_001844.1   | Equid herpesvirus 4, complete genome                    |
| tegument protein UL16          | gi 9629818 ref NC_001847.1   | Bovine herpesvirus 1, complete genome                   |
| tegument protein UL16          | gi 126882977 ref NC_002686.2 | Cercopithecine herpesvirus 9, complete genome           |
| tegument protein UL16          | gi 123318702 ref NC_005261.2 | Bovine herpesvirus 5, complete genome                   |
| tegument protein UL16          | gi 51557483 ref NC_006151.1  | Suid herpesvirus 1, complete genome                     |
| tegument protein UL16          | gi 216905852 ref NC_011644.1 | Equid herpesvirus 9, complete genome                    |
| tegument protein UL16          | gi 281190771 ref NC_013590.2 | Felid herpesvirus 1, complete genome                    |
| tegument protein UL16          | gi 675510705 ref NC_024771.1 | Equid herpesvirus 3 strain AR/2007/C3A, complete genome |
| tegument protein UL21          | gi 9625875 ref NC_001348.1   | Human herpesvirus 3, complete genome                    |

|                       |                                                                                       |
|-----------------------|---------------------------------------------------------------------------------------|
| tegument protein UL21 | gi 50313241 ref NC_001491.2  Equid herpesvirus 1, complete genome                     |
| tegument protein UL21 | gi 9629732 ref NC_001844.1  Equid herpesvirus 4, complete genome                      |
| tegument protein UL21 | gi 9629818 ref NC_001847.1  Bovine herpesvirus 1, complete genome                     |
| tegument protein UL21 | gi 126882977 ref NC_002686.2  Cercopithecine herpesvirus 9, complete genome           |
| tegument protein UL21 | gi 123318702 ref NC_005261.2  Bovine herpesvirus 5, complete genome                   |
| tegument protein UL21 | gi 51557483 ref NC_006151.1  Suid herpesvirus 1, complete genome                      |
| tegument protein UL21 | gi 216905852 ref NC_011644.1  Equid herpesvirus 9, complete genome                    |
| tegument protein UL21 | gi 281190771 ref NC_013590.2  Felid herpesvirus 1, complete genome                    |
| tegument protein UL21 | gi 675510705 ref NC_024771.1  Equid herpesvirus 3 strain AR/2007/C3A, complete genome |
| tegument protein UL37 | gi 9625875 ref NC_001348.1  Human herpesvirus 3, complete genome                      |
| tegument protein UL37 | gi 50313241 ref NC_001491.2  Equid herpesvirus 1, complete genome                     |
| tegument protein UL37 | gi 9629732 ref NC_001844.1  Equid herpesvirus 4, complete genome                      |
| tegument protein UL37 | gi 9629818 ref NC_001847.1  Bovine herpesvirus 1, complete genome                     |
| tegument protein UL37 | gi 123318702 ref NC_005261.2  Bovine herpesvirus 5, complete genome                   |
| tegument protein UL37 | gi 51557483 ref NC_006151.1  Suid herpesvirus 1, complete genome                      |
| tegument protein UL37 | gi 216905852 ref NC_011644.1  Equid herpesvirus 9, complete genome                    |
| tegument protein UL37 | gi 281190771 ref NC_013590.2  Felid herpesvirus 1, complete genome                    |
| tegument protein UL37 | gi 675510705 ref NC_024771.1  Equid herpesvirus 3 strain AR/2007/C3A, complete genome |
| tegument protein UL51 | gi 9625875 ref NC_001348.1  Human herpesvirus 3, complete genome                      |
| tegument protein UL51 | gi 50313241 ref NC_001491.2  Equid herpesvirus 1, complete genome                     |
| tegument protein UL51 | gi 9629732 ref NC_001844.1  Equid herpesvirus 4, complete genome                      |
| tegument protein UL51 | gi 9629818 ref NC_001847.1  Bovine herpesvirus 1, complete genome                     |
| tegument protein UL51 | gi 126882977 ref NC_002686.2  Cercopithecine herpesvirus 9, complete genome           |



|                          |                                                                                       |
|--------------------------|---------------------------------------------------------------------------------------|
| tegument protein UL51    | gi 123318702 ref NC_005261.2  Bovine herpesvirus 5, complete genome                   |
| tegument protein UL51    | gi 51557483 ref NC_006151.1  Suid herpesvirus 1, complete genome                      |
| tegument protein UL51    | gi 216905852 ref NC_011644.1  Equid herpesvirus 9, complete genome                    |
| tegument protein UL51    | gi 281190771 ref NC_013590.2  Felid herpesvirus 1, complete genome                    |
| tegument protein UL51    | gi 386522723 ref NC_017826.1  Equid herpesvirus 8, complete genome                    |
| tegument protein UL51    | gi 675510705 ref NC_024771.1  Equid herpesvirus 3 strain AR/2007/C3A, complete genome |
| tegument protein UL7     | gi 9625875 ref NC_001348.1  Human herpesvirus 3, complete genome                      |
| tegument protein UL7     | gi 50313241 ref NC_001491.2  Equid herpesvirus 1, complete genome                     |
| tegument protein UL7     | gi 9629732 ref NC_001844.1  Equid herpesvirus 4, complete genome                      |
| tegument protein UL7     | gi 9629818 ref NC_001847.1  Bovine herpesvirus 1, complete genome                     |
| tegument protein UL7     | gi 126882977 ref NC_002686.2  Cercopithecine herpesvirus 9, complete genome           |
| tegument protein UL7     | gi 123318702 ref NC_005261.2  Bovine herpesvirus 5, complete genome                   |
| tegument protein UL7     | gi 51557483 ref NC_006151.1  Suid herpesvirus 1, complete genome                      |
| tegument protein UL7     | gi 216905852 ref NC_011644.1  Equid herpesvirus 9, complete genome                    |
| tegument protein UL7     | gi 281190771 ref NC_013590.2  Felid herpesvirus 1, complete genome                    |
| tegument protein UL7     | gi 675510705 ref NC_024771.1  Equid herpesvirus 3 strain AR/2007/C3A, complete genome |
| tegument protein VP11/12 | gi 9625875 ref NC_001348.1  Human herpesvirus 3, complete genome                      |
| tegument protein VP11/12 | gi 50313241 ref NC_001491.2  Equid herpesvirus 1, complete genome                     |
| tegument protein VP11/12 | gi 9629732 ref NC_001844.1  Equid herpesvirus 4, complete genome                      |
| tegument protein VP11/12 | gi 9629818 ref NC_001847.1  Bovine herpesvirus 1, complete genome                     |
| tegument protein VP11/12 | gi 126882977 ref NC_002686.2  Cercopithecine herpesvirus 9, complete genome           |
| tegument protein VP11/12 | gi 123318702 ref NC_005261.2  Bovine herpesvirus 5, complete genome                   |
| tegument protein VP11/12 | gi 51557483 ref NC_006151.1  Suid herpesvirus 1, complete genome                      |

|                                          |                                                                                       |
|------------------------------------------|---------------------------------------------------------------------------------------|
| tegument protein VP11/12                 | gi 216905852 ref NC_011644.1  Equid herpesvirus 9, complete genome                    |
| tegument protein VP11/12                 | gi 281190771 ref NC_013590.2  Felid herpesvirus 1, complete genome                    |
| tegument protein VP11/12                 | gi 675510705 ref NC_024771.1  Equid herpesvirus 3 strain AR/2007/C3A, complete genome |
| tegument protein VP13/14                 | gi 50313241 ref NC_001491.2  Equid herpesvirus 1, complete genome                     |
| tegument protein VP13/14                 | gi 9629732 ref NC_001844.1  Equid herpesvirus 4, complete genome                      |
| tegument protein VP13/14                 | gi 9629818 ref NC_001847.1  Bovine herpesvirus 1, complete genome                     |
| tegument protein VP13/14                 | gi 126882977 ref NC_002686.2  Cercopithecine herpesvirus 9, complete genome           |
| tegument protein VP13/14                 | gi 123318702 ref NC_005261.2  Bovine herpesvirus 5, complete genome                   |
| tegument protein VP13/14                 | gi 51557483 ref NC_006151.1  Suid herpesvirus 1, complete genome                      |
| tegument protein VP13/14                 | gi 216905852 ref NC_011644.1  Equid herpesvirus 9, complete genome                    |
| tegument protein VP13/14                 | gi 281190771 ref NC_013590.2  Felid herpesvirus 1, complete genome                    |
| tegument protein VP13/14                 | gi 675510705 ref NC_024771.1  Equid herpesvirus 3 strain AR/2007/C3A, complete genome |
| tegument protein VP22                    | gi 50313241 ref NC_001491.2  Equid herpesvirus 1, complete genome                     |
| tegument protein VP22                    | gi 9629732 ref NC_001844.1  Equid herpesvirus 4, complete genome                      |
| tegument protein VP22                    | gi 9629818 ref NC_001847.1  Bovine herpesvirus 1, complete genome                     |
| tegument protein VP22                    | gi 123318702 ref NC_005261.2  Bovine herpesvirus 5, complete genome                   |
| tegument protein VP22                    | gi 51557483 ref NC_006151.1  Suid herpesvirus 1, complete genome                      |
| tegument protein VP22                    | gi 216905852 ref NC_011644.1  Equid herpesvirus 9, complete genome                    |
| tegument protein VP22                    | gi 281190771 ref NC_013590.2  Felid herpesvirus 1, complete genome                    |
| tegument protein VP22                    | gi 386522723 ref NC_017826.1  Equid herpesvirus 8, complete genome                    |
| tegument protein VP22                    | gi 675510705 ref NC_024771.1  Equid herpesvirus 3 strain AR/2007/C3A, complete genome |
| tegument serine/threonine protein kinase | gi 9625875 ref NC_001348.1  Human herpesvirus 3, complete genome                      |
| tegument serine/threonine protein kinase | gi 50313241 ref NC_001491.2  Equid herpesvirus 1, complete genome                     |

|                                          |                                                                                       |
|------------------------------------------|---------------------------------------------------------------------------------------|
| tegument serine/threonine protein kinase | gi 9629732 ref NC_001844.1  Equid herpesvirus 4, complete genome                      |
| tegument serine/threonine protein kinase | gi 9629818 ref NC_001847.1  Bovine herpesvirus 1, complete genome                     |
| tegument serine/threonine protein kinase | gi 123318702 ref NC_005261.2  Bovine herpesvirus 5, complete genome                   |
| tegument serine/threonine protein kinase | gi 51557483 ref NC_006151.1  Suid herpesvirus 1, complete genome                      |
| tegument serine/threonine protein kinase | gi 216905852 ref NC_011644.1  Equid herpesvirus 9, complete genome                    |
| tegument serine/threonine protein kinase | gi 281190771 ref NC_013590.2  Felid herpesvirus 1, complete genome                    |
| tegument serine/threonine protein kinase | gi 386522723 ref NC_017826.1  Equid herpesvirus 8, complete genome                    |
| tegument serine/threonine protein kinase | gi 675510705 ref NC_024771.1  Equid herpesvirus 3 strain AR/2007/C3A, complete genome |
| thymidine kinase                         | gi 9625875 ref NC_001348.1  Human herpesvirus 3, complete genome                      |
| thymidine kinase                         | gi 50313241 ref NC_001491.2  Equid herpesvirus 1, complete genome                     |
| thymidine kinase                         | gi 9629732 ref NC_001844.1  Equid herpesvirus 4, complete genome                      |
| thymidine kinase                         | gi 9629818 ref NC_001847.1  Bovine herpesvirus 1, complete genome                     |
| thymidine kinase                         | gi 126882977 ref NC_002686.2  Cercopithecine herpesvirus 9, complete genome           |
| thymidine kinase                         | gi 123318702 ref NC_005261.2  Bovine herpesvirus 5, complete genome                   |
| thymidine kinase                         | gi 51557483 ref NC_006151.1  Suid herpesvirus 1, complete genome                      |
| thymidine kinase                         | gi 216905852 ref NC_011644.1  Equid herpesvirus 9, complete genome                    |
| thymidine kinase                         | gi 281190771 ref NC_013590.2  Felid herpesvirus 1, complete genome                    |
| thymidine kinase                         | gi 386522723 ref NC_017826.1  Equid herpesvirus 8, complete genome                    |
| thymidine kinase                         | gi 675510705 ref NC_024771.1  Equid herpesvirus 3 strain AR/2007/C3A, complete genome |
| thymidylate synthase                     | gi 9625875 ref NC_001348.1  Human herpesvirus 3, complete genome                      |
| transactivating tegument protein VP16    | gi 9625875 ref NC_001348.1  Human herpesvirus 3, complete genome                      |
| transactivating tegument protein VP16    | gi 50313241 ref NC_001491.2  Equid herpesvirus 1, complete genome                     |
| transactivating tegument protein VP16    | gi 9629732 ref NC_001844.1  Equid herpesvirus 4, complete genome                      |

|                                       |                              |                                                         |
|---------------------------------------|------------------------------|---------------------------------------------------------|
| transactivating tegument protein VP16 | gi 9629818 ref NC_001847.1   | Bovine herpesvirus 1, complete genome                   |
| transactivating tegument protein VP16 | gi 126882977 ref NC_002686.2 | Cercopithecine herpesvirus 9, complete genome           |
| transactivating tegument protein VP16 | gi 123318702 ref NC_005261.2 | Bovine herpesvirus 5, complete genome                   |
| transactivating tegument protein VP16 | gi 51557483 ref NC_006151.1  | Suid herpesvirus 1, complete genome                     |
| transactivating tegument protein VP16 | gi 216905852 ref NC_011644.1 | Equid herpesvirus 9, complete genome                    |
| transactivating tegument protein VP16 | gi 281190771 ref NC_013590.2 | Felid herpesvirus 1, complete genome                    |
| transactivating tegument protein VP16 | gi 675510705 ref NC_024771.1 | Equid herpesvirus 3 strain AR/2007/C3A, complete genome |
| transcriptional regulator ICP4        | gi 9625875 ref NC_001348.1   | Human herpesvirus 3, complete genome                    |
| transcriptional regulator ICP4        | gi 50313241 ref NC_001491.2  | Equid herpesvirus 1, complete genome                    |
| transcriptional regulator ICP4        | gi 9629732 ref NC_001844.1   | Equid herpesvirus 4, complete genome                    |
| transcriptional regulator ICP4        | gi 9629818 ref NC_001847.1   | Bovine herpesvirus 1, complete genome                   |
| transcriptional regulator ICP4        | gi 126882977 ref NC_002686.2 | Cercopithecine herpesvirus 9, complete genome           |
| transcriptional regulator ICP4        | gi 123318702 ref NC_005261.2 | Bovine herpesvirus 5, complete genome                   |
| transcriptional regulator ICP4        | gi 51557483 ref NC_006151.1  | Suid herpesvirus 1, complete genome                     |
| transcriptional regulator ICP4        | gi 216905852 ref NC_011644.1 | Equid herpesvirus 9, complete genome                    |
| transcriptional regulator ICP4        | gi 281190771 ref NC_013590.2 | Felid herpesvirus 1, complete genome                    |
| transcriptional regulator ICP4        | gi 675510705 ref NC_024771.1 | Equid herpesvirus 3 strain AR/2007/C3A, complete genome |
| ubiquitin E3 ligase ICP0              | gi 9625875 ref NC_001348.1   | Human herpesvirus 3, complete genome                    |
| ubiquitin E3 ligase ICP0              | gi 50313241 ref NC_001491.2  | Equid herpesvirus 1, complete genome                    |
| ubiquitin E3 ligase ICP0              | gi 9629732 ref NC_001844.1   | Equid herpesvirus 4, complete genome                    |
| ubiquitin E3 ligase ICP0              | gi 9629818 ref NC_001847.1   | Bovine herpesvirus 1, complete genome                   |
| ubiquitin E3 ligase ICP0              | gi 126882977 ref NC_002686.2 | Cercopithecine herpesvirus 9, complete genome           |
| ubiquitin E3 ligase ICP0              | gi 123318702 ref NC_005261.2 | Bovine herpesvirus 5, complete genome                   |

ubiquitin E3 ligase ICP0 gi|51557483|ref|NC\_006151.1| Suid herpesvirus 1, complete genome  
 ubiquitin E3 ligase ICP0 gi|216905852|ref|NC\_011644.1| Equid herpesvirus 9, complete genome  
 ubiquitin E3 ligase ICP0 gi|281190771|ref|NC\_013590.2| Felid herpesvirus 1, complete genome  
 ubiquitin E3 ligase ICP0 gi|675510705|ref|NC\_024771.1| Equid herpesvirus 3 strain AR/2007/C3A, complete genome  
 uracil DNA glycosylase gi|9629818|ref|NC\_001847.1| Bovine herpesvirus 1, complete genome  
 uracil DNA glycosylase gi|126882977|ref|NC\_002686.2| Cercopithecine herpesvirus 9, complete genome  
 uracil-DNA glycosylase gi|9625875|ref|NC\_001348.1| Human herpesvirus 3, complete genome  
 uracil-DNA glycosylase gi|50313241|ref|NC\_001491.2| Equid herpesvirus 1, complete genome  
 uracil-DNA glycosylase gi|9629732|ref|NC\_001844.1| Equid herpesvirus 4, complete genome  
 uracil-DNA glycosylase gi|123318702|ref|NC\_005261.2| Bovine herpesvirus 5, complete genome  
 uracil-DNA glycosylase gi|51557483|ref|NC\_006151.1| Suid herpesvirus 1, complete genome  
 uracil-DNA glycosylase gi|216905852|ref|NC\_011644.1| Equid herpesvirus 9, complete genome  
 uracil-DNA glycosylase gi|281190771|ref|NC\_013590.2| Felid herpesvirus 1, complete genome  
 uracil-DNA glycosylase gi|675510705|ref|NC\_024771.1| Equid herpesvirus 3 strain AR/2007/C3A, complete genome  
 virion protein gi|216905852|ref|NC\_011644.1| Equid herpesvirus 9, complete genome  
 virion protein US10 gi|9625875|ref|NC\_001348.1| Human herpesvirus 3, complete genome  
 virion protein US10 gi|50313241|ref|NC\_001491.2| Equid herpesvirus 1, complete genome  
 virion protein US10 gi|9629732|ref|NC\_001844.1| Equid herpesvirus 4, complete genome  
 virion protein US10 gi|126882977|ref|NC\_002686.2| Cercopithecine herpesvirus 9, complete genome  
 virion protein US10 gi|281190771|ref|NC\_013590.2| Felid herpesvirus 1, complete genome  
 virion protein US10 gi|386522723|ref|NC\_017826.1| Equid herpesvirus 8, complete genome  
 virion protein US10 gi|675510705|ref|NC\_024771.1| Equid herpesvirus 3 strain AR/2007/C3A, complete genome  
 virion protein US2 gi|50313241|ref|NC\_001491.2| Equid herpesvirus 1, complete genome

|                    |                              |                                                         |
|--------------------|------------------------------|---------------------------------------------------------|
| virion protein US2 | gi 9629732 ref NC_001844.1   | Equid herpesvirus 4, complete genome                    |
| virion protein US2 | gi 9629818 ref NC_001847.1   | Bovine herpesvirus 1, complete genome                   |
| virion protein US2 | gi 123318702 ref NC_005261.2 | Bovine herpesvirus 5, complete genome                   |
| virion protein US2 | gi 51557483 ref NC_006151.1  | Suid herpesvirus 1, complete genome                     |
| virion protein US2 | gi 216905852 ref NC_011644.1 | Equid herpesvirus 9, complete genome                    |
| virion protein US2 | gi 675510705 ref NC_024771.1 | Equid herpesvirus 3 strain AR/2007/C3A, complete genome |
| virion protein V67 | gi 50313241 ref NC_001491.2  | Equid herpesvirus 1, complete genome                    |
| virion protein V67 | gi 9629732 ref NC_001844.1   | Equid herpesvirus 4, complete genome                    |
| virion protein V67 | gi 9629818 ref NC_001847.1   | Bovine herpesvirus 1, complete genome                   |
| virion protein V67 | gi 123318702 ref NC_005261.2 | Bovine herpesvirus 5, complete genome                   |
| virion protein V67 | gi 216905852 ref NC_011644.1 | Equid herpesvirus 9, complete genome                    |
| virion protein V67 | gi 675510705 ref NC_024771.1 | Equid herpesvirus 3 strain AR/2007/C3A, complete genome |
