# Supplementary material for: Intensive Distribution of G2-Quaduplexes in the Pseudorabies Virus Genome and Their Sensitivity to Cations and G-Quadruplex Ligands
Source: MDPI journal article supplement (doi:10.3390/molecules24040774), 2019-02-21
Supplement: s1 [file s1]

Table S4. PQSs from *UL5* 3'UTR and *UL9* 3'UTR, and mutant sequence.

| Name             | Sequence (5'-3') |
|------------------|------------------|
| UL5-3'UTR-2G     | GGCGAGCGGAGGAGG  |
| UL9-3'UTR-2G     | GGCGGGCGGCGG     |
| UL9-3'UTR-3G-mut | GGGCGGGCGGGCGGG  |
