# Supplementary material for: Intensive Distribution of G2-Quaduplexes in the Pseudorabies Virus Genome and Their Sensitivity to Cations and G-Quadruplex Ligands
Source: MDPI journal article supplement (doi:10.3390/molecules24040774), 2019-02-21
Supplement: s1 [file s1]

Table S5. Oligonucleotide sequences for plasmids construction.

| Primer      | Sequence (5'-3')                     |
|-------------|--------------------------------------|
| UL5-3'UTR-F | GGCGAGCGGAGGAGGAATAAAATATCTTTATTTTC  |
| UL5-3'UTR-R | CCTCCTCCGCTCGCCTTACTGCTCGTTCCTTCAGCA |
| UL9-3'UTR-F | GGCGGGCGGCGGAATAAAATATCTTTATTTTC     |
| UL9-3'UTR-R | CCGCCGCCCCGCCTTACTGCTCGTTCCTTCAGCA   |
