# Supplementary material for: Intensive Distribution of G2-Quaduplexes in the Pseudorabies Virus Genome and Their Sensitivity to Cations and G-Quadruplex Ligands
Source: MDPI journal article supplement (doi:10.3390/molecules24040774), 2019-02-21
Supplement: s1 [file s1]

Table S2. G<sub>2</sub>-PQSs with 100% conservation in the large latency transcripts among twenty-five PRV genome sequences.

| Sequence 5'-3'                                          | Nucleotide position |
|---------------------------------------------------------|---------------------|
| GGGGGCAGGAGCGGCGCGG                                     | 96413-96432         |
| GGTAGCGGAGCGGGGGG                                       | 96514-96530         |
| GGGGGGCGGCGGTCTCGGGGGCAGAGGCAGAGGGCGACGGG               | 96564-96604         |
| GGGCCGGCCCCGGCCCCGAGG                                   | 96674-96695         |
| GGGGAGCGCCTGGGCGCCGGCCTCTGG                             | 96839-96865         |
| GGTGGAGGATGGAGGTGACGCGGG                                | 97434-97457         |
| GGCGCTGGAAGCCTCGGCGGTGG                                 | 97660-97682         |
| GGGGGGTTGATGGGGATGGGCGCTCGGGGG                          | 99290-99319         |
| GGGGGCGAGGCAGGG                                         | 99533-99547         |
| GGTGGTGGGGATGAGTGGATGGATGGAGGCGAGGGACGCGGTGG            | 99899-99942         |
| GGATGGCGAGGATGTGGGGGAGAGGTCTCCCGCGCTTAGTGGG             | 100455-100498       |
| GGGGGCGGGGCTTAAAGGGGGGGGG                               | 101174-101198       |
| GGGGGTCCGCGGGCGGGGG                                     | 101863-101881       |
| GGAGCAGCAGGTAGGGGTTGCCGGCGTCCTCGG                       | 103176-103208       |
| GGGCCCAGCGGGCCGCGGGGCGG                                 | 103243-103267       |
| GGGGCGGCCTCGGCGTCGGG                                    | 103472-103491       |
| GGCGGTAGGCGCGCGGCGGCAGCGGGACCGGGGTCCGGGGCCCCGGCGCGGG    | 103737-103787       |
| GGCGGCAGAGGCGCAGCGGCTCGGCCCCGGGGTGCAGGCGGGCGAAGGAGG     | 103815-103865       |
| GGCGGTGGGCGAAGGCGG                                      | 104220-104237       |
| GGCCGCCGCGGCGCGGTCCCAGGCCGGGCGCGGGGCGCCCTCGGCGGGCTCGG   | 104253-104306       |
| GGGCGGCCGGGTCTGAAGG                                     | 104436-104453       |
| GGGCGCGGGGTGCTCGGGCATGGGCCGAGCGGGCGCCGAGCCGG            | 104599-104644       |
| GGGAGCGGGGTCCGAGCGGG                                    | 104683-104703       |
| GGGGCGGCGGGCCCCGGGCGCGCGG                               | 104824-104848       |
| GGCGCCACGTGCGGGCGACGAGGG                                | 105230-105254       |
| GGGGCACGCGGCCGGGTGCGCGGCGGCGAAGGCGGCGCGGACGCGGGCGCAGAGG | 105462-105527       |
| GCCTCGACGG                                              |                     |
| GGCGGCTCATGGCCACGG                                      | 105633-105650       |
| GGGTCTGGGCGGCCATGG                                      | 105680-105698       |
| GGTGATGAAGGAGCCGTGGCCGTGGGGCGCGTGACCCGGCGCTGGCAGAACTGG  | 105736-105790       |
| GGACATGGCCTCGCCGCGG                                     | 105835-105854       |
| GGGCACGGGCCCCGGCCGCGGCGCGGTAGCGGGCCGCGGCCTGGCGG         | 105925-105970       |
| GGACGCGGCCGTGCGCCGAGGGTCGGAGCCGGGCCAGGG                 | 106023-106062       |
| GGCCCGTCGGTCGGCGGGGGCCCGTCGG                            | 106085-106112       |
| GGCGCGGCGCCGGCGGGG                                      | 106507-106524       |
| GGGGCTCGCGGTGCTGGTGATGG                                 | 106719-106741       |
| GGCGGAGGGG                                              | 106762-106772       |
| GGCTGTGCTGGTGGCGCCGGGTCCGAGG                            | 106865-106893       |
| GGGGTCGGCGGCCGGGGCCCGAGCCGGCCCGGACCGGGGGCCCGAGGACGAGG   | 107063-107116       |
| GGGGGACCCGGCGGCCGGGGACCCGGG                             | 107152-107178       |
| GGCGGCCCGCGCCAATGGG                                     | 107939-107958       |
