# Supplementary material for: Intensive Distribution of G2-Quaduplexes in the Pseudorabies Virus Genome and Their Sensitivity to Cations and G-Quadruplex Ligands
Source: MDPI journal article supplement (doi:10.3390/molecules24040774), 2019-02-21
Supplement: s1 [file s1]

Table S1. G<sub>2</sub>-PQSs with 100% conservation in repeat regions among twenty-five PRV genome sequences.

| Sequence 5'-3'                         | Nucleotide position | Genome Location |
|----------------------------------------|---------------------|-----------------|
| GGGGAAGGTCGGGCGATGG                    | 110127-110146       | IRS             |
| GGCACCACAGGCGGGAGCGGGTCGCTCGGGGGAAGG   | 110470-110506       | IRS             |
| GGCGCGGCCGGCTCGGCGGCCCGG               | 111721-111744       | IRS             |
| GGCGGCGGGGAGCGCGG                      | 111813-111830       | IRS             |
| GGGCGGGGCGGGGG                         | 131926-131939       | TRS             |
| GGAGAAGGCGAGGGAGACGGAGAGGGAGG          | 132667-132695       | TRS             |
| GGACCGAGGCGACGGCGGAGACGGAGACGG         | 134715-134744       | TRS             |
| GGGGGCGGGGG                            | 135068-135078       | TRS             |
| GGTTCGGGTCCGGTCGCCGGTCCCCGGTCCGACGGCGG | 135706-135743       | TRS             |
| GGCCGCCGCGGGGGCCGG                     | 136420-136437       | TRS             |
| GGGGGAAGCGGAAGGGGCCGG                  | 142824-142844       | TRS             |
