# Supplementary material for: Intensive Distribution of G2-Quaduplexes in the Pseudorabies Virus Genome and Their Sensitivity to Cations and G-Quadruplex Ligands
Source: MDPI journal article supplement (doi:10.3390/molecules24040774), 2019-02-21
Supplement: s1 [file s1]

Table S3. Oligonucleotide sequences for Circular dichroism (CD) spectroscopy.

| PQS                                                | Site          | x:y:z    | Label    | Location                            |
|----------------------------------------------------|---------------|----------|----------|-------------------------------------|
| GGTGGAGGATGGAGGTGACGCGGG                           | 97434-97457   | 6:03:01  | LLT-PQS1 | Start-Prv-miR-1-5'                  |
| GGCGCTGCGGCGGTGGCGAGGGGCTTCTGGGGCGG                | 97605-97639   | 7:04:01  | LLT-PQS2 | Start-Prv-miR-1-5'                  |
| GGAGGAGGAGGAGGAGGAGG                               | 104653-104672 | 13:10:03 | LLT-PQS3 | Prv-miR-11-1-End                    |
| GGCGGCGGCGGGGGCCCCGGGGGGCGGAGGGCGAGCGGGCCGGGGAGAGG | 106393-106441 | 12:09:03 | LLT-PQS4 | Prv-miR-11-1-End                    |
| GGACCGGGGACCGGCGACCGG                              | 108866-108886 | 4:01:01  | LLT-PQS5 | Prv-miR-11-1-End                    |
| GGACCCGGAAGGAAGGAGCCGG                             | 108952-108973 | 5:02:01  | LLT-PQS6 | Prv-miR-11-1-End                    |
| GGAGGGTCGGGAGGACGGATGGTCGGTCGGACGGGGCGGGCGGGGAGGG  | 109610-109658 | 12:09:03 | IRS-PQS1 | Between <i>IE180</i> and <i>US1</i> |
| GGCGGAGGAGGAGGAAGAAGGAGAGGAAGG                     | 111118-111147 | 8:05:02  | IRS-PQS2 | Between <i>IE180</i> and <i>US1</i> |
| GGGGGGCGTGGGGGTCGAGGCGGGGGACGGGGGG                 | 128470-128503 | 9:06:02  | TRS-PQS1 | Complementary to <i>US1</i> CDS     |
| GGGTGGGGGTGGCTGGATGGATTGGATGGATTGAATGGGTGG         | 128810-128851 | 10:07:02 | TRS-PQS2 | Complementary to <i>US1</i> CDS     |
| GGGGGAGGGGAGGGGGGAGG                               | 128984-129003 | 6:03:01  | TRS-PQS3 | Complementary to <i>US1</i> CDS     |
| GGGGTGGGGAGGGAGGGGGGACGGGGAGG                      | 129122-129150 | 7:04:01  | TRS-PQS4 | Complementary to <i>US1</i> CDS     |
| GGGTGGGTGGGGGAGGGGGTTGATGGCCGCGCTGGTTCCGGG         | 131809-131850 | 9:06:02  | TRS-PQS5 | Between <i>IE180</i> and <i>US1</i> |
| GGAGTGAGAGGCGGAGAGGGGCGGGCGAGCGGAGGAGG             | 92293-92330   | 8:05:02  | UL5-3UTR | <i>UL5</i> 3'UTR                    |
| GGGGATCGACCGGGAGAGGCGCGG                           | 115268-115291 | 4:01:01  | US1-5UTR | <i>US1</i> 5'UTR                    |
